# Supplementary material
Source: PubMed Central journal article supplement (PMC7043790)
Supplement: NIHMS1554272-supplement-WHITE_JACS_Spectra_02690s_pdf.pdf [file NIHMS1554272-supplement-WHITE_JACS_Spectra_02690s_pdf.pdf]

| Parameter                 | Value               |
|---------------------------|---------------------|
| 1 Origin                  | Bruker BioSpin GmbH |
| 2 Instrument              | spect               |
| 3 Solvent                 | CDCl3               |
| 4 Temperature             | 298.1               |
| 5 Pulse Sequence          | zg30                |
| 6 Experiment              | 1D                  |
| 7 Number of Scans         | 16                  |
| 8 Receiver Gain           | 94.3                |
| 9 Relaxation Delay        | 15.0000             |
| 10 Pulse Width            | 12.0000             |
| 11 Spectrometer Frequency | 500.35              |
| 12 Spectral Width         | 10000.0             |
| 13 Lowest Frequency       | -1921.3             |
| 14 Nucleus                | 1H                  |
| 15 Acquired Size          | 32768               |
| 16 Spectral Size          | 65536               |

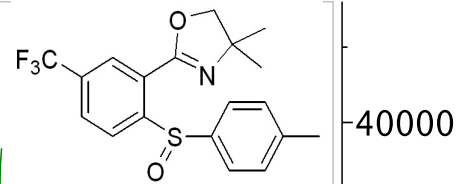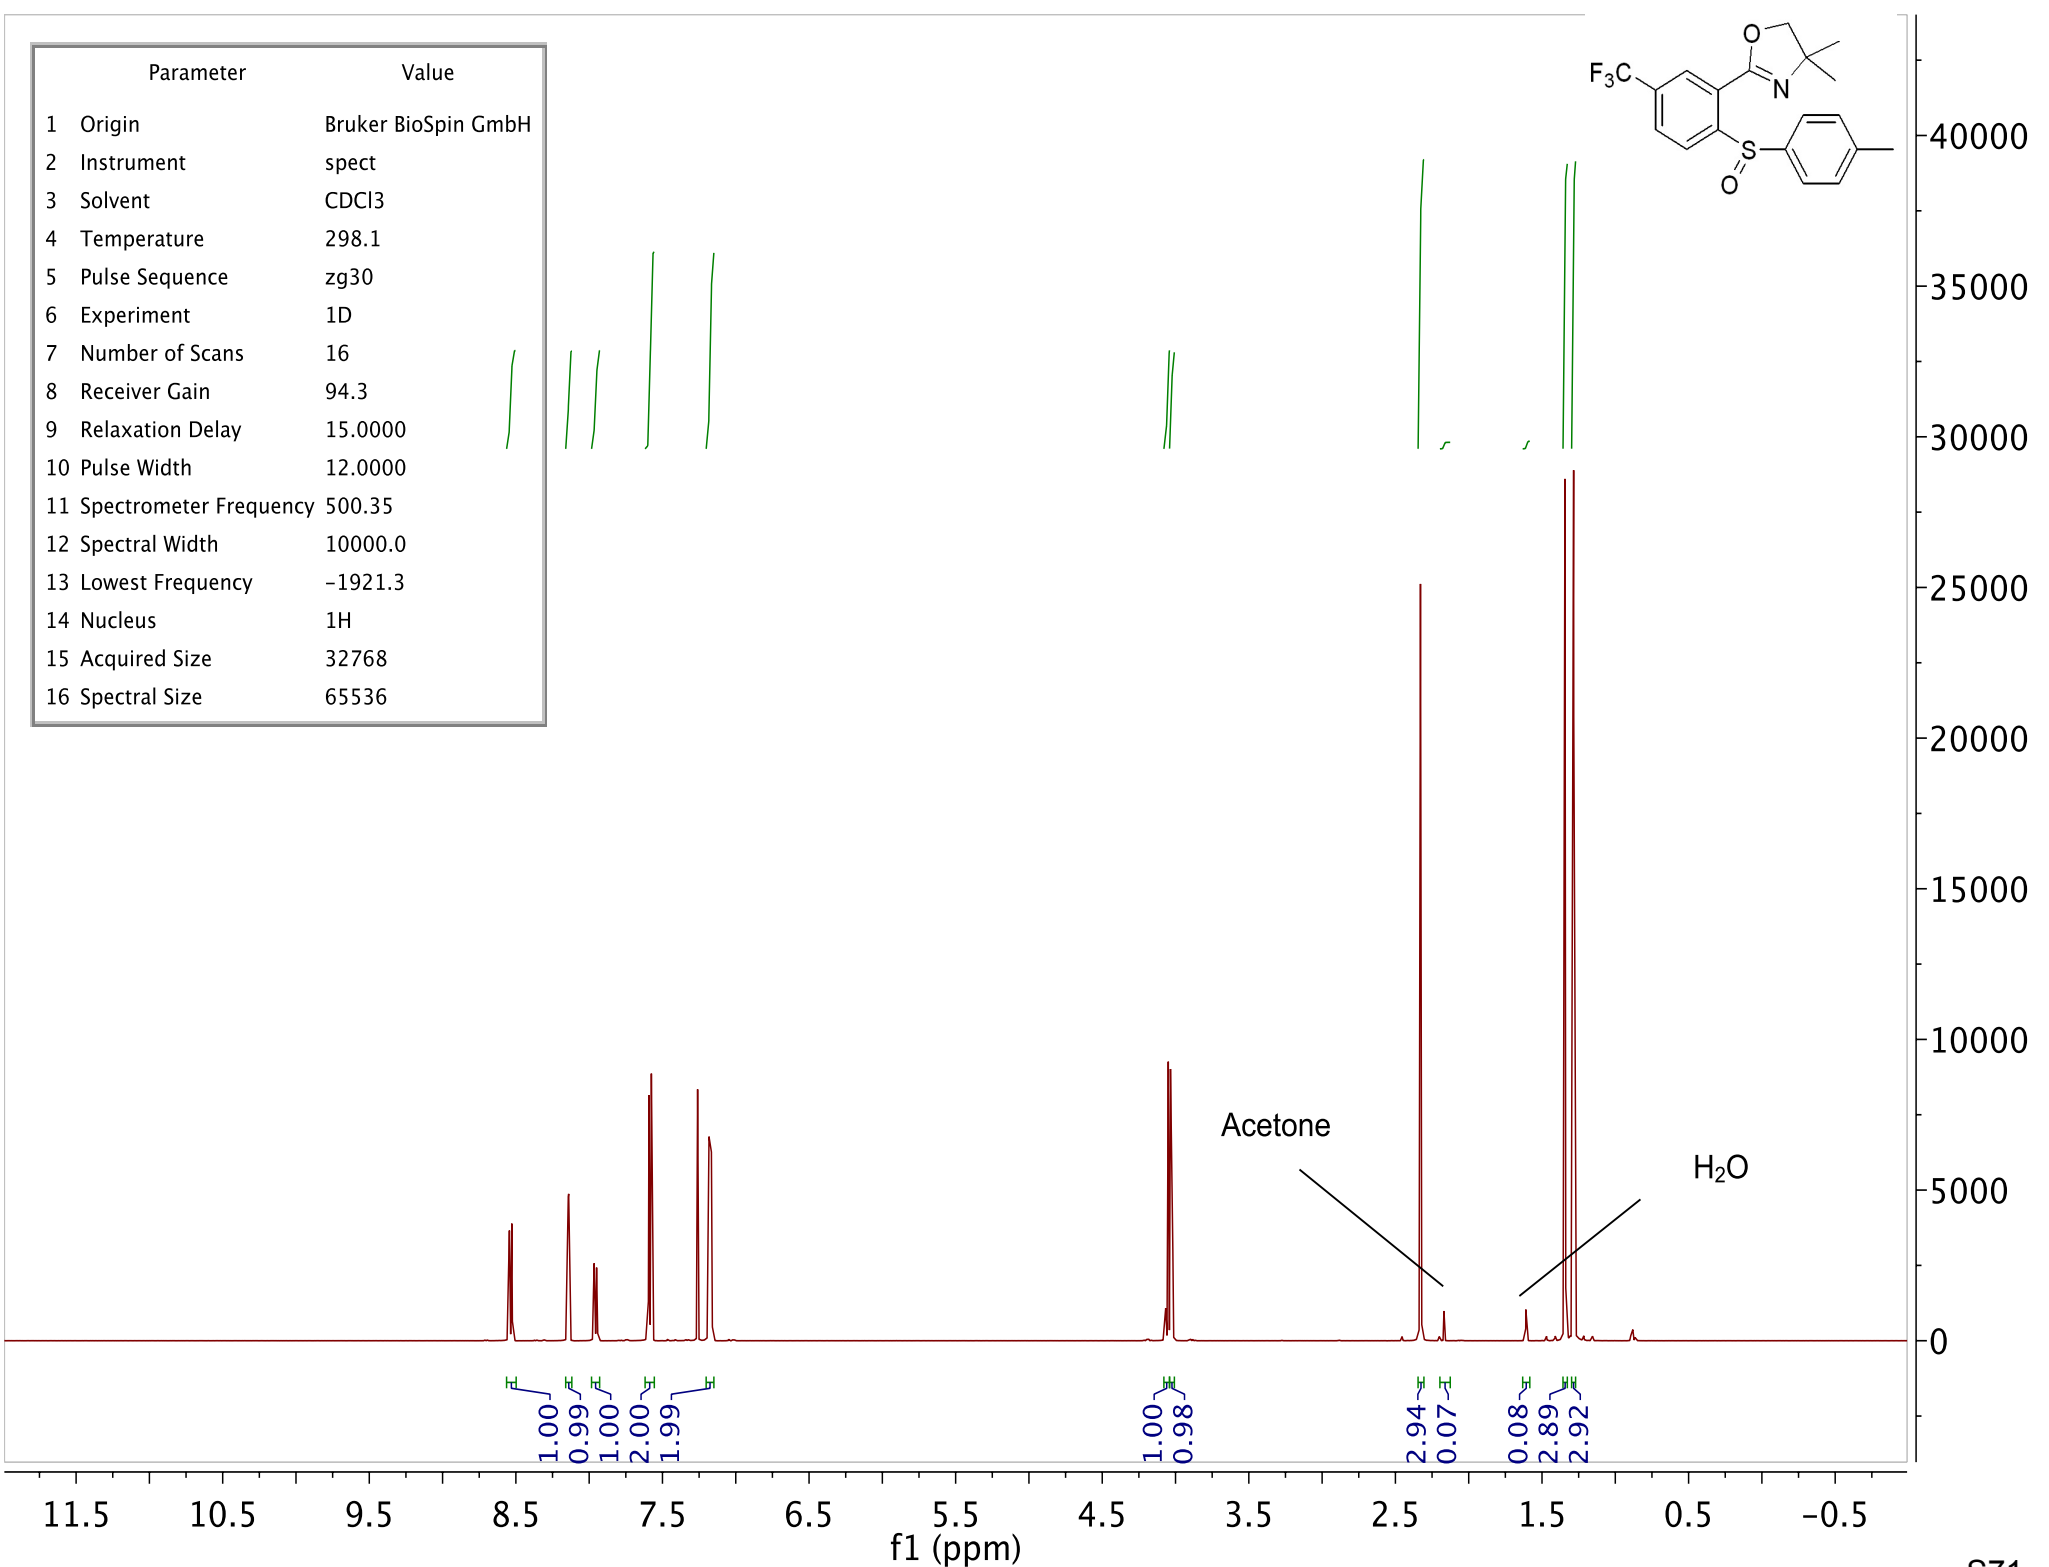

Integration values (from left to right): 1.00, 0.99, 1.00, 2.00, 1.99, 1.00, 0.98, 2.94, 0.07, 0.08, 2.89, 2.92

| Parameter                 | Value               |
|---------------------------|---------------------|
| 1 Origin                  | Bruker BioSpin GmbH |
| 2 Instrument              | spect               |
| 3 Solvent                 | CDCl3               |
| 4 Temperature             | 298.1               |
| 5 Pulse Sequence          | zgpg30              |
| 6 Experiment              | 1D                  |
| 7 Number of Scans         | 256                 |
| 8 Receiver Gain           | 190.5               |
| 9 Relaxation Delay        | 2.0000              |
| 10 Pulse Width            | 10.0000             |
| 11 Spectrometer Frequency | 125.83              |
| 12 Spectral Width         | 31512.6             |
| 13 Lowest Frequency       | -1899.0             |
| 14 Nucleus                | 13C                 |
| 15 Acquired Size          | 32768               |
| 16 Spectral Size          | 65536               |

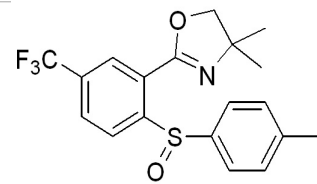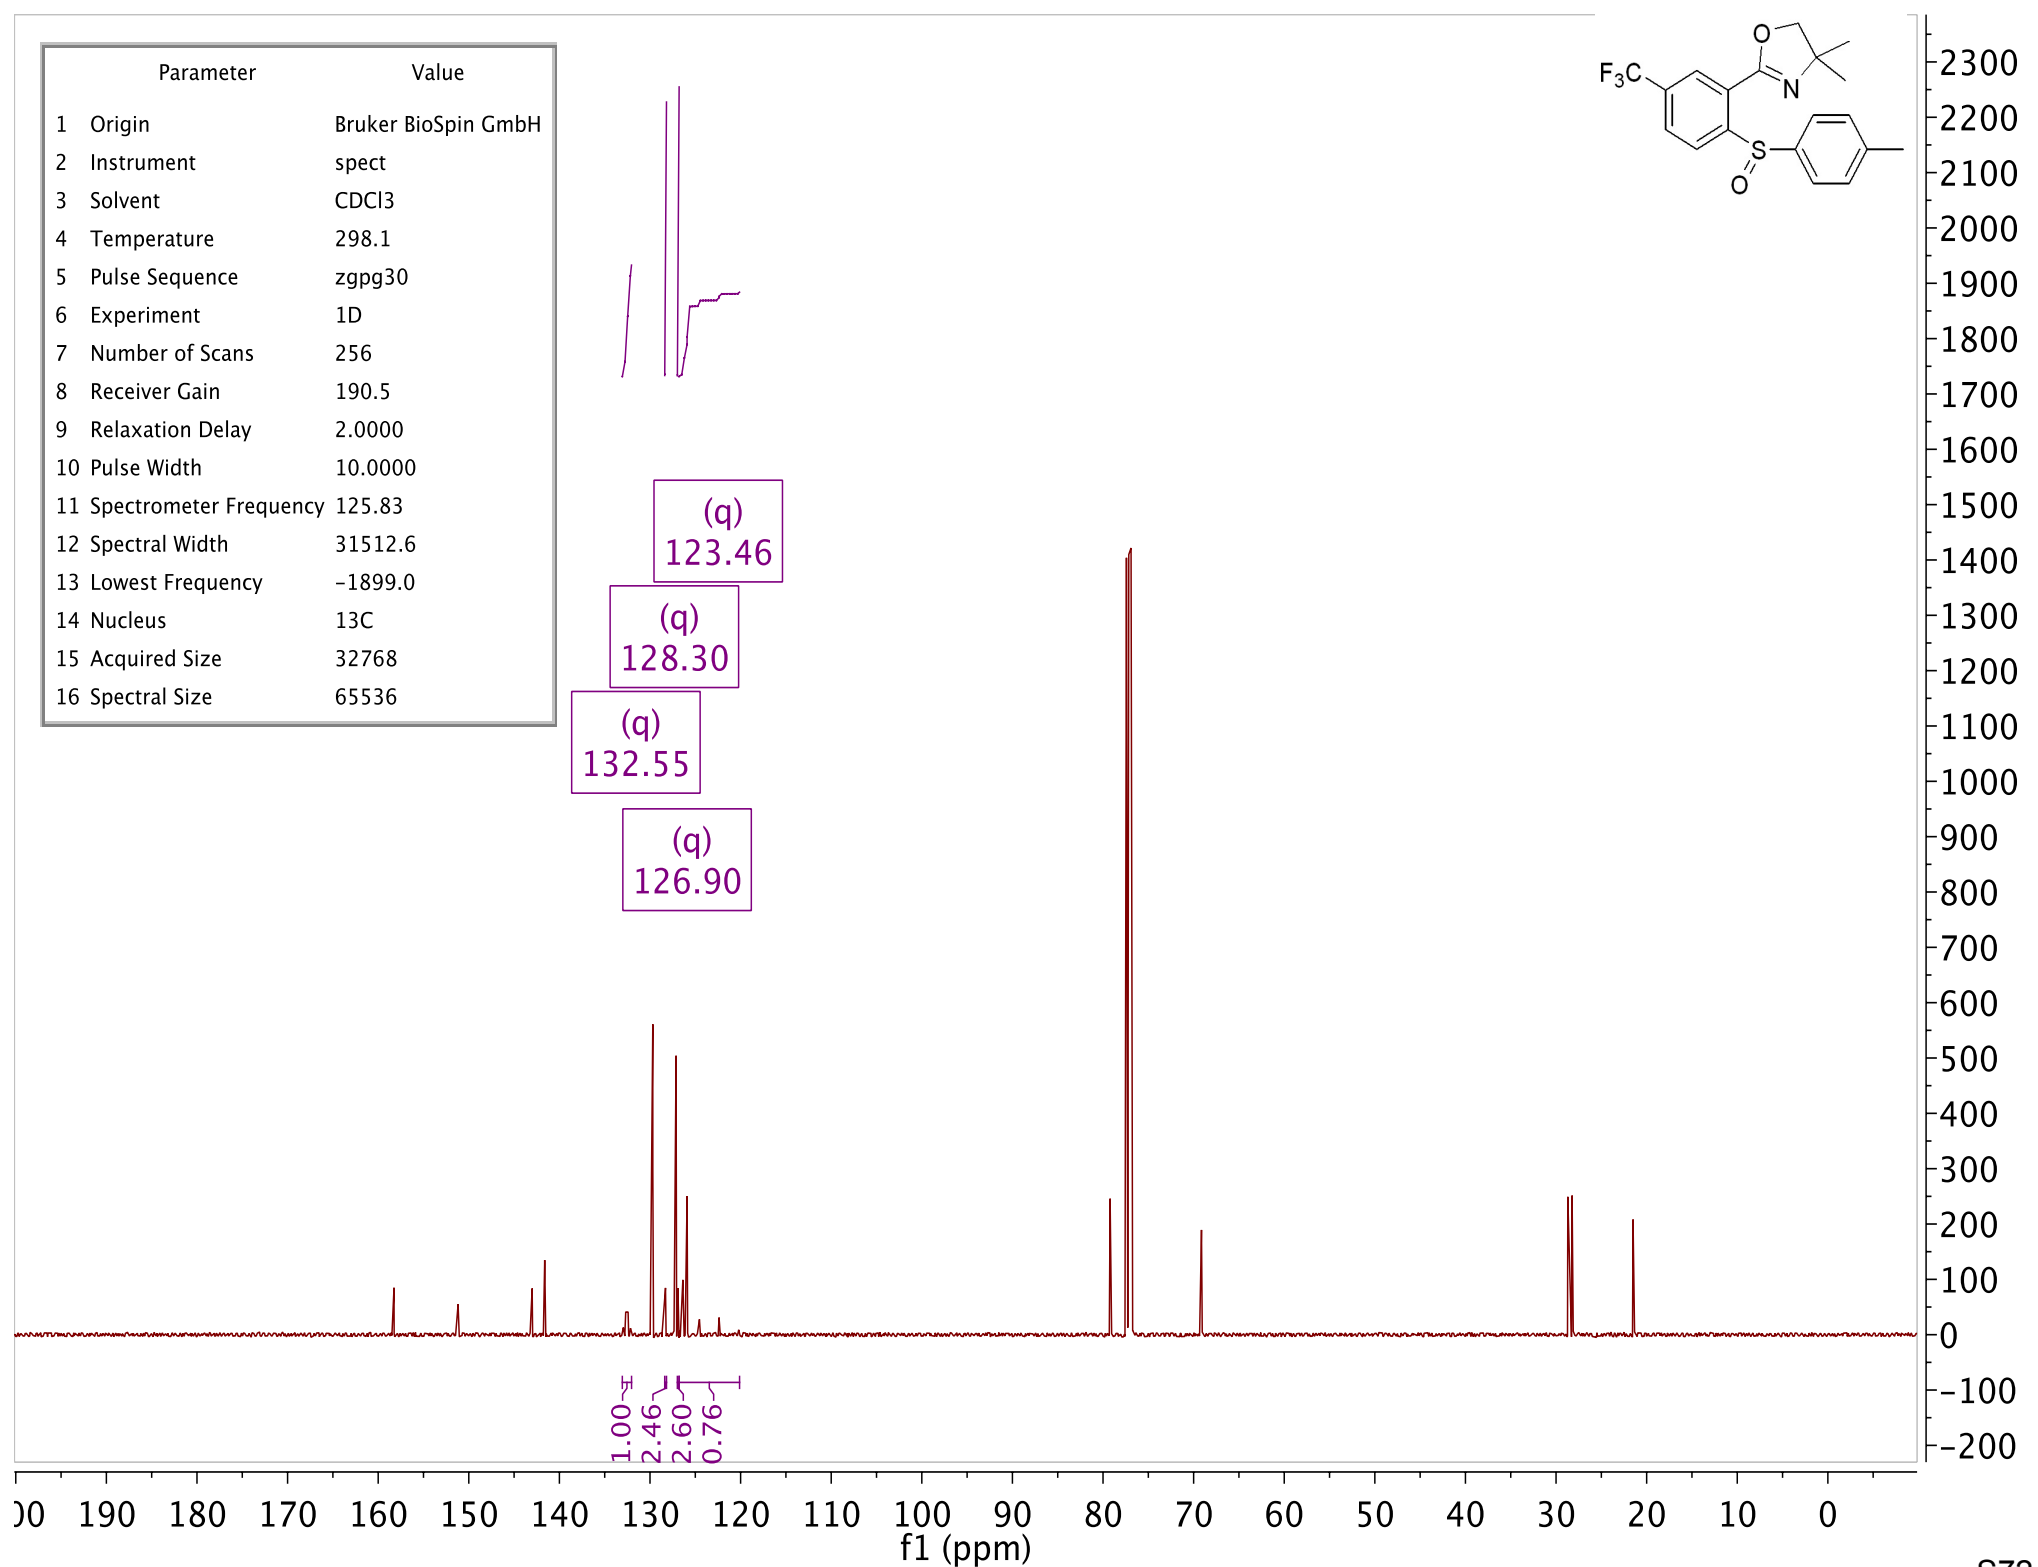

180-100 ppm

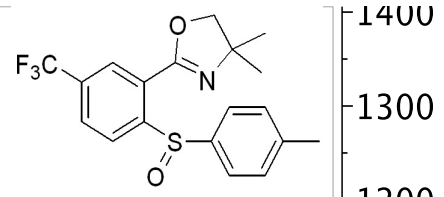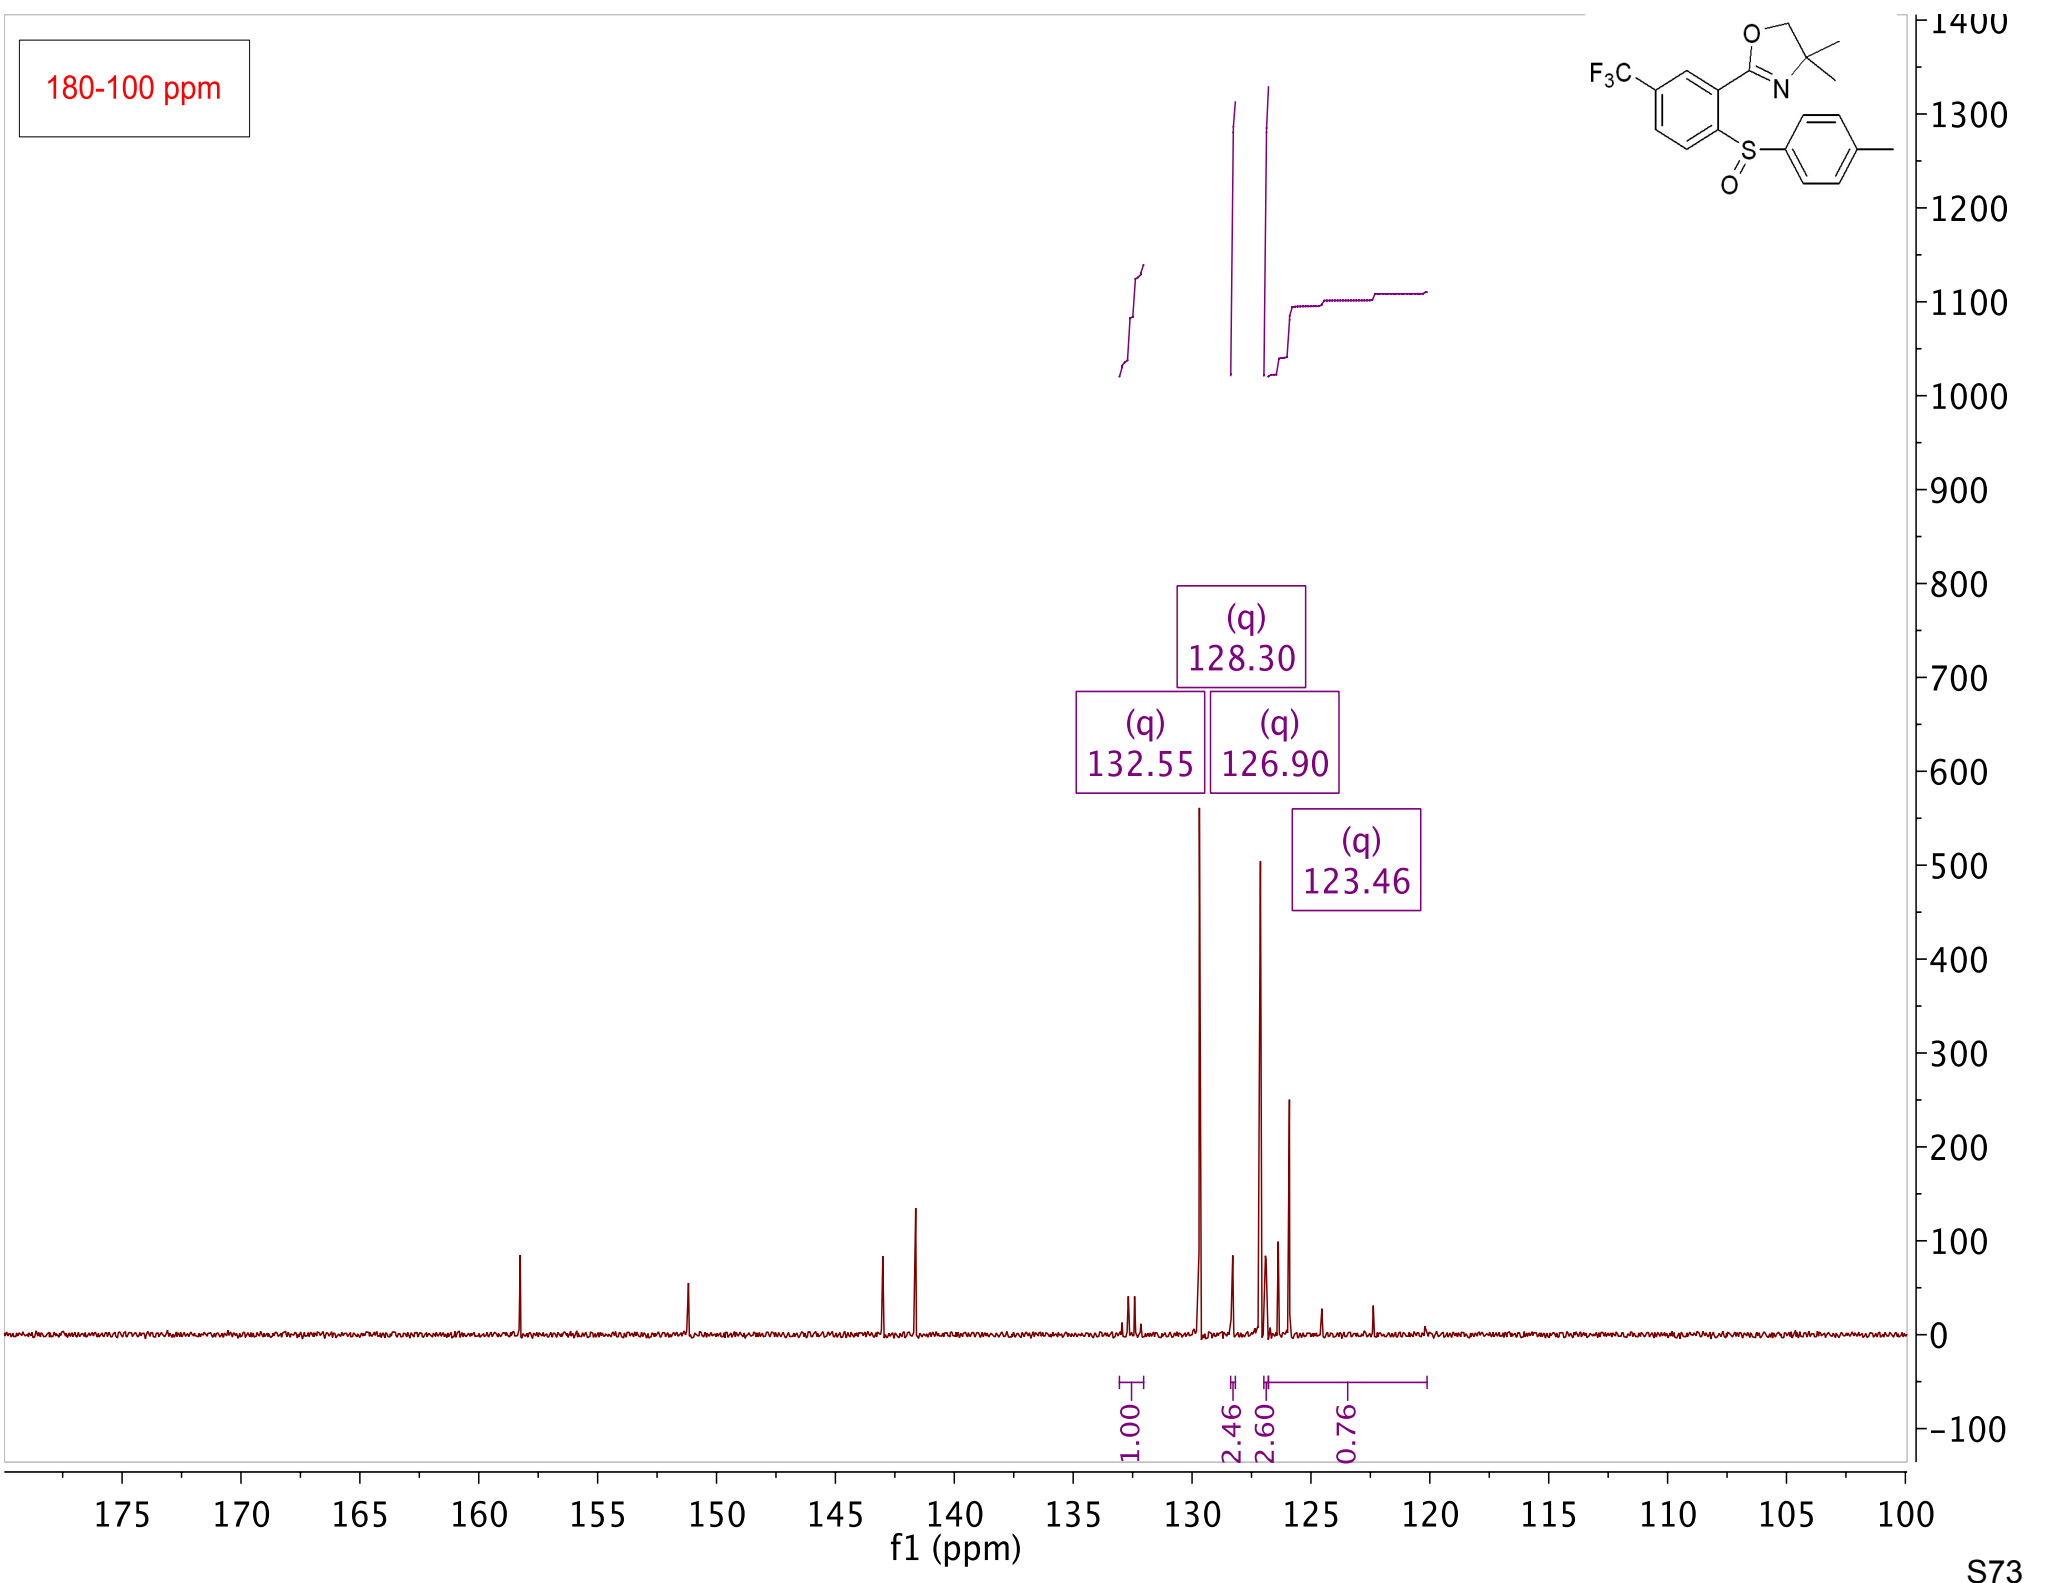

| Parameter                 | Value               |
|---------------------------|---------------------|
| 1 Origin                  | Bruker BioSpin GmbH |
| 2 Instrument              | spect               |
| 3 Solvent                 | CDCl3               |
| 4 Temperature             | 298.2               |
| 5 Pulse Sequence          | zg30                |
| 6 Experiment              | 1D                  |
| 7 Number of Scans         | 16                  |
| 8 Receiver Gain           | 29.7                |
| 9 Relaxation Delay        | 15.0000             |
| 10 Pulse Width            | 12.0000             |
| 11 Spectrometer Frequency | 500.35              |
| 12 Spectral Width         | 10000.0             |
| 13 Lowest Frequency       | -1921.3             |
| 14 Nucleus                | 1H                  |
| 15 Acquired Size          | 32768               |
| 16 Spectral Size          | 65536               |

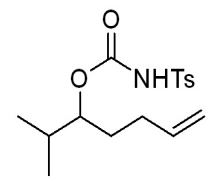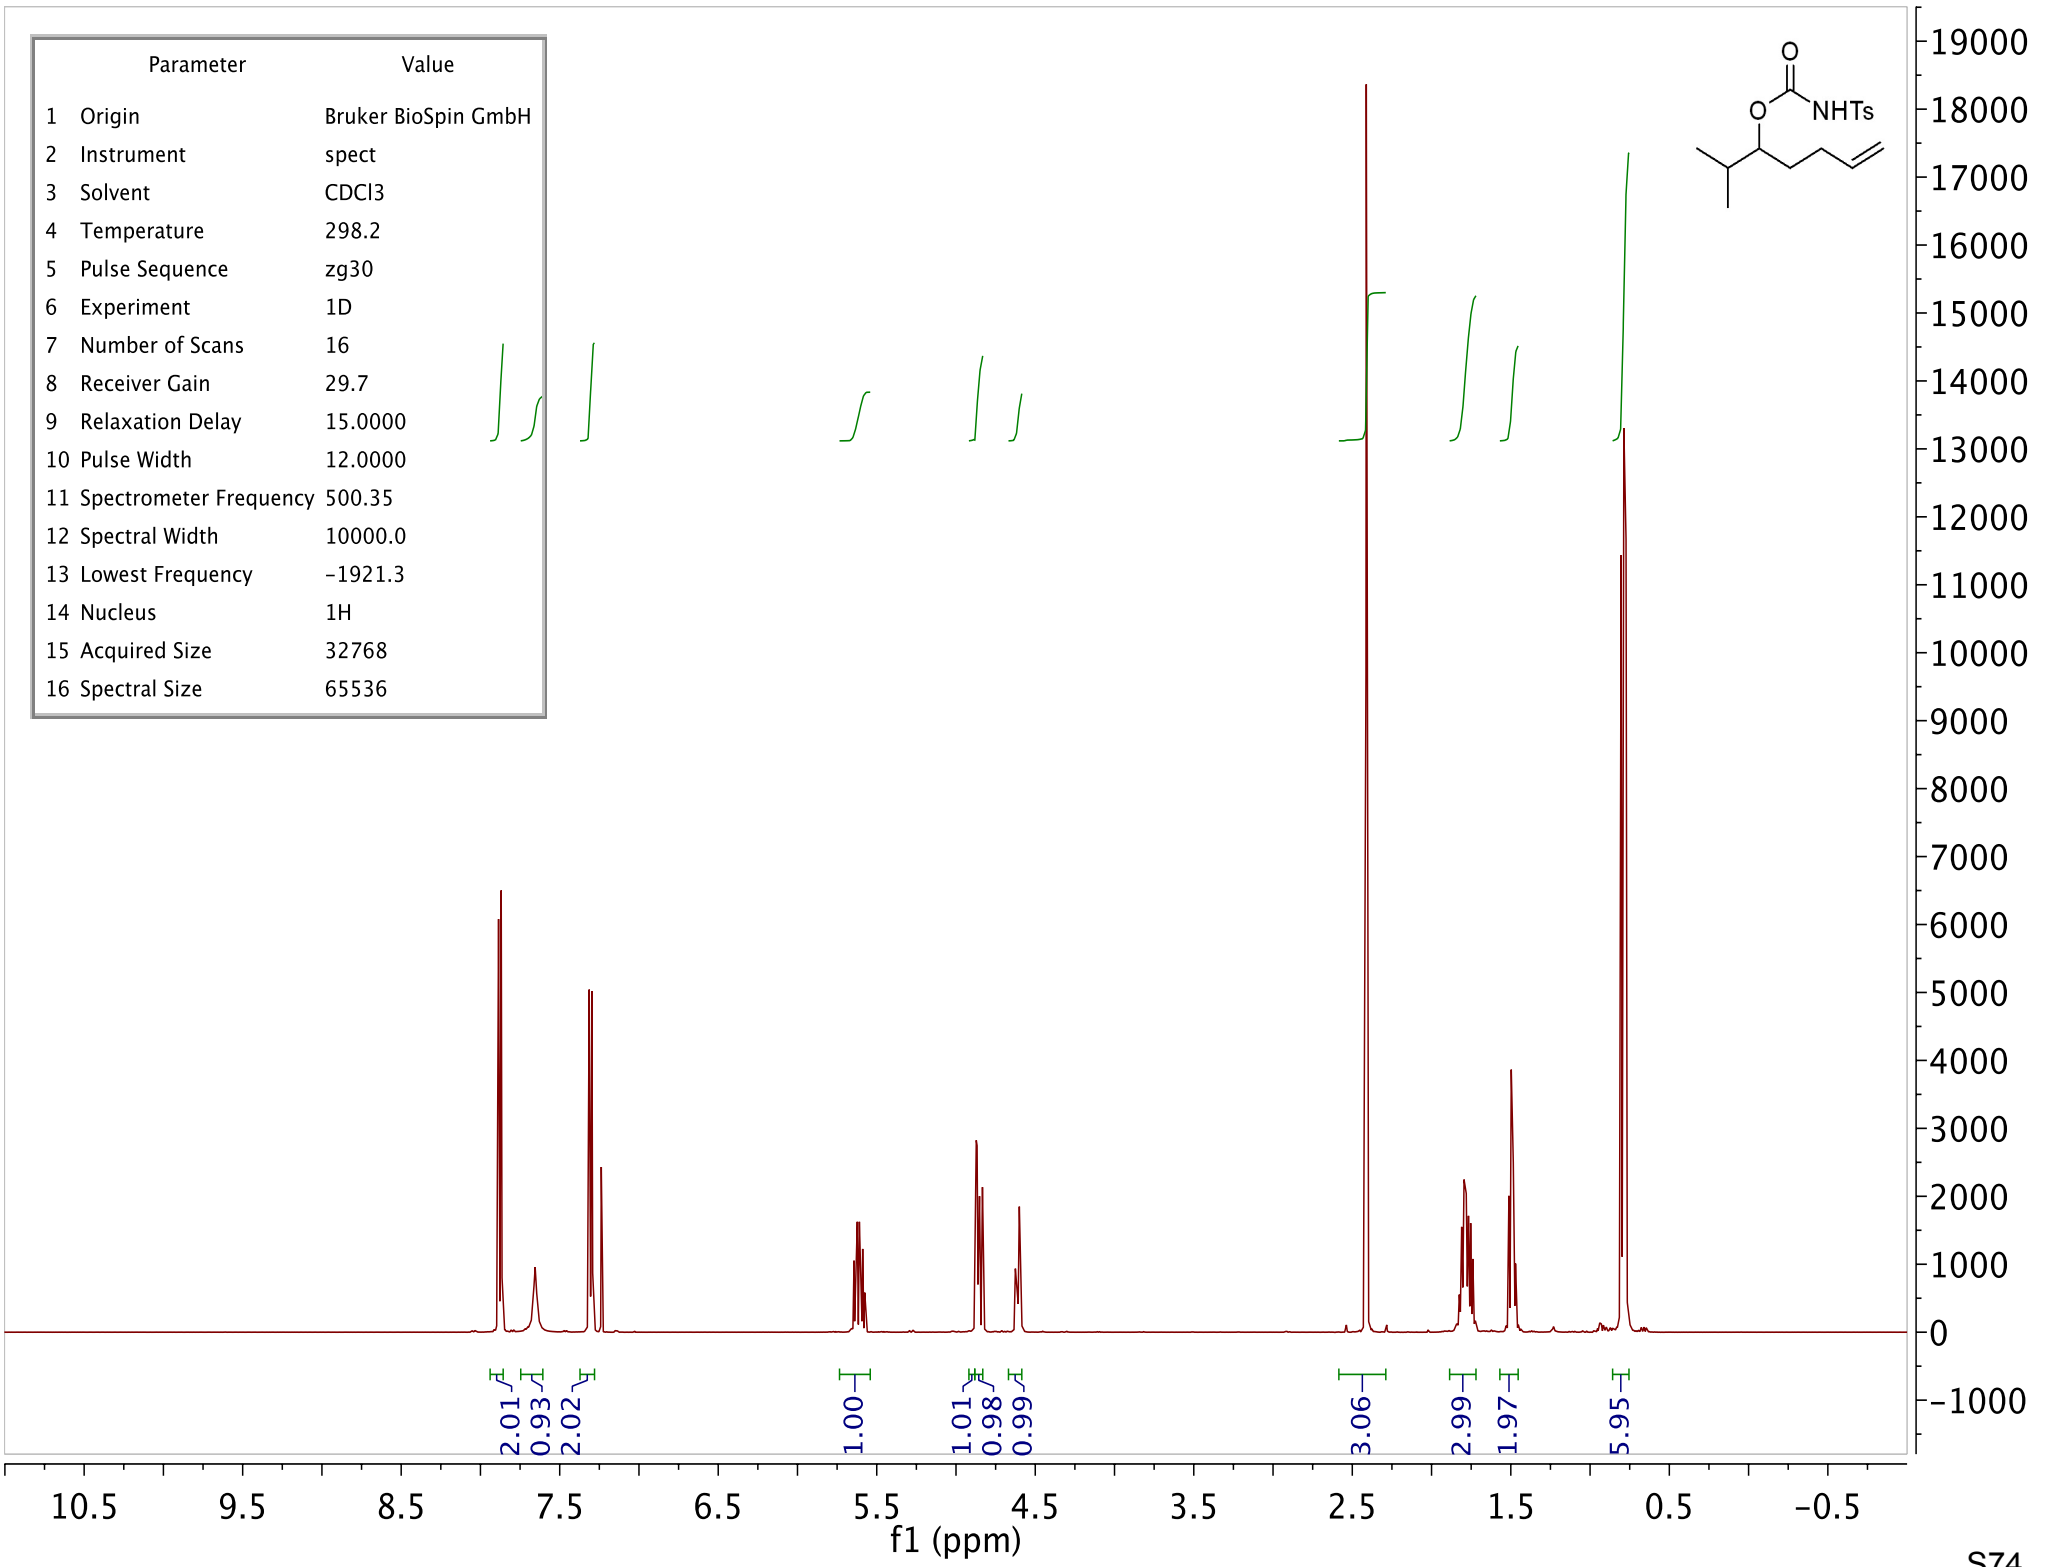

| Parameter                 | Value               |
|---------------------------|---------------------|
| 1 Origin                  | Bruker BioSpin GmbH |
| 2 Instrument              | spect               |
| 3 Solvent                 | CDCl3               |
| 4 Temperature             | 298.1               |
| 5 Pulse Sequence          | zgpg30              |
| 6 Experiment              | 1D                  |
| 7 Number of Scans         | 256                 |
| 8 Receiver Gain           | 190.5               |
| 9 Relaxation Delay        | 2.0000              |
| 10 Pulse Width            | 10.0000             |
| 11 Spectrometer Frequency | 125.83              |
| 12 Spectral Width         | 31512.6             |
| 13 Lowest Frequency       | -1900.4             |
| 14 Nucleus                | 13C                 |
| 15 Acquired Size          | 32768               |
| 16 Spectral Size          | 65536               |

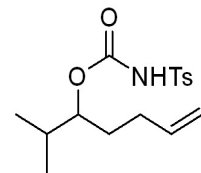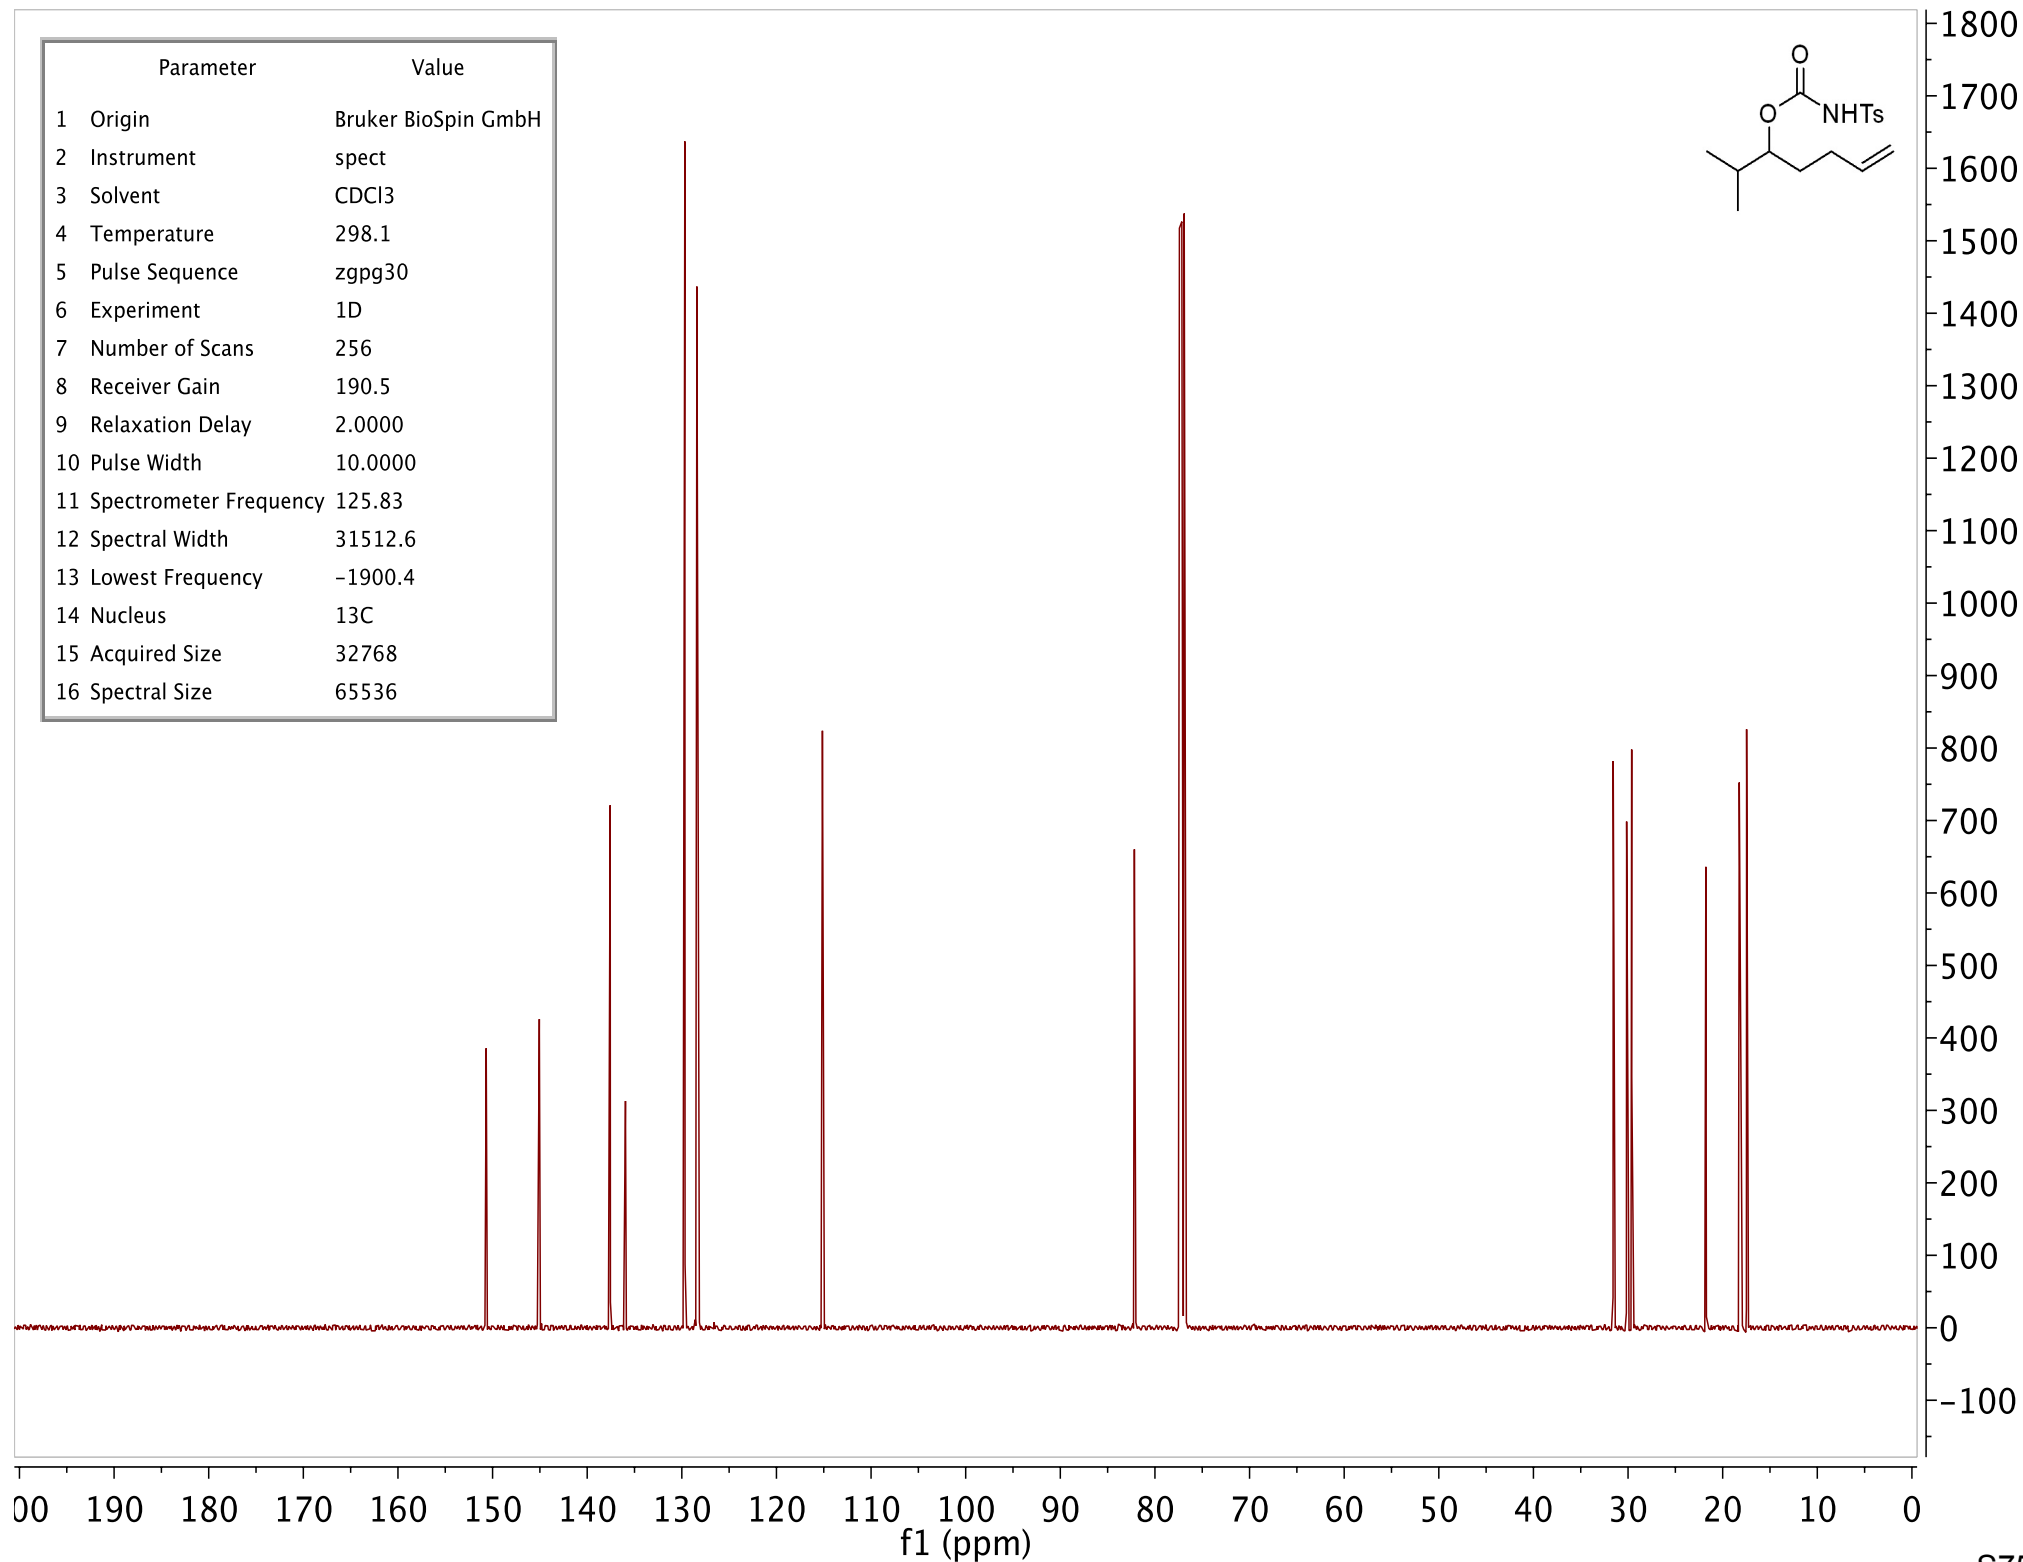

| Parameter                 | Value               |
|---------------------------|---------------------|
| 1 Origin                  | Bruker BioSpin GmbH |
| 2 Instrument              | spect               |
| 3 Solvent                 | CDCl3               |
| 4 Temperature             | 298.1               |
| 5 Pulse Sequence          | zg30                |
| 6 Experiment              | 1D                  |
| 7 Number of Scans         | 16                  |
| 8 Receiver Gain           | 55.0                |
| 9 Relaxation Delay        | 15.0000             |
| 10 Pulse Width            | 12.0000             |
| 11 Spectrometer Frequency | 500.35              |
| 12 Spectral Width         | 10000.0             |
| 13 Lowest Frequency       | -1922.3             |
| 14 Nucleus                | 1H                  |
| 15 Acquired Size          | 32768               |
| 16 Spectral Size          | 65536               |

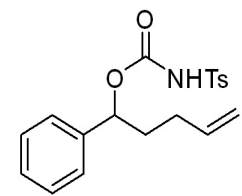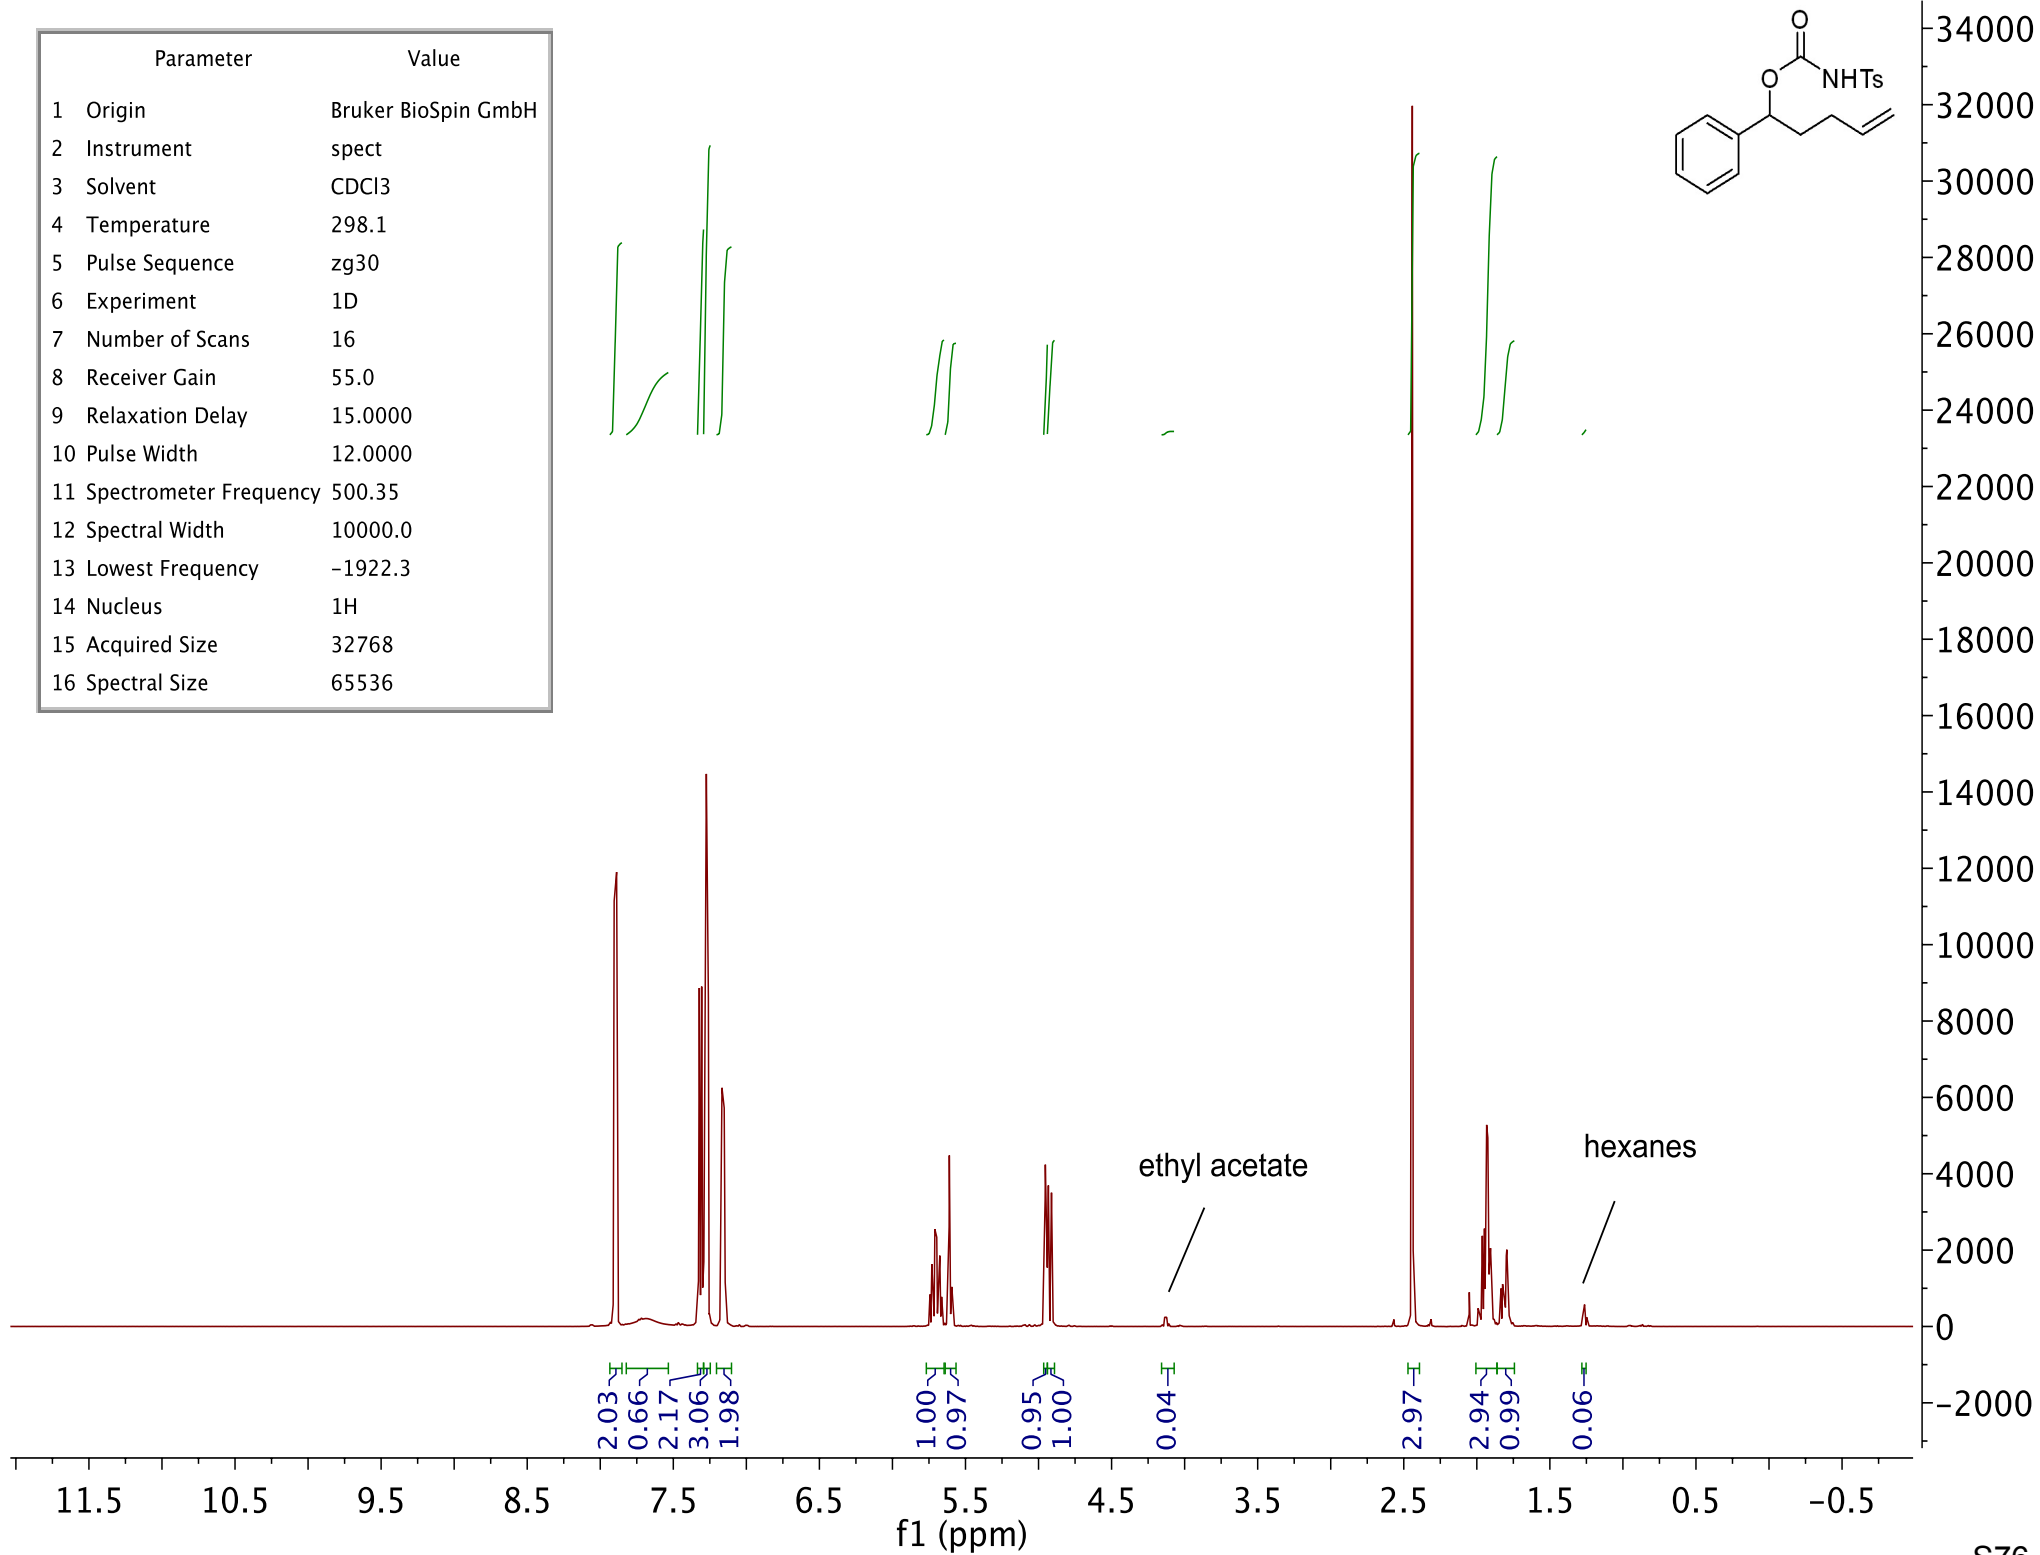

| Parameter                 | Value               |
|---------------------------|---------------------|
| 1 Origin                  | Bruker BioSpin GmbH |
| 2 Instrument              | spect               |
| 3 Solvent                 | CDCl3               |
| 4 Temperature             | 298.2               |
| 5 Pulse Sequence          | zgpg30              |
| 6 Experiment              | 1D                  |
| 7 Number of Scans         | 256                 |
| 8 Receiver Gain           | 190.5               |
| 9 Relaxation Delay        | 2.0000              |
| 10 Pulse Width            | 10.0000             |
| 11 Spectrometer Frequency | 125.83              |
| 12 Spectral Width         | 31512.6             |
| 13 Lowest Frequency       | -1902.4             |
| 14 Nucleus                | 13C                 |
| 15 Acquired Size          | 32768               |
| 16 Spectral Size          | 65536               |

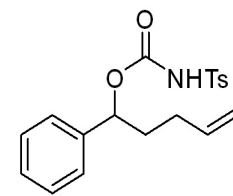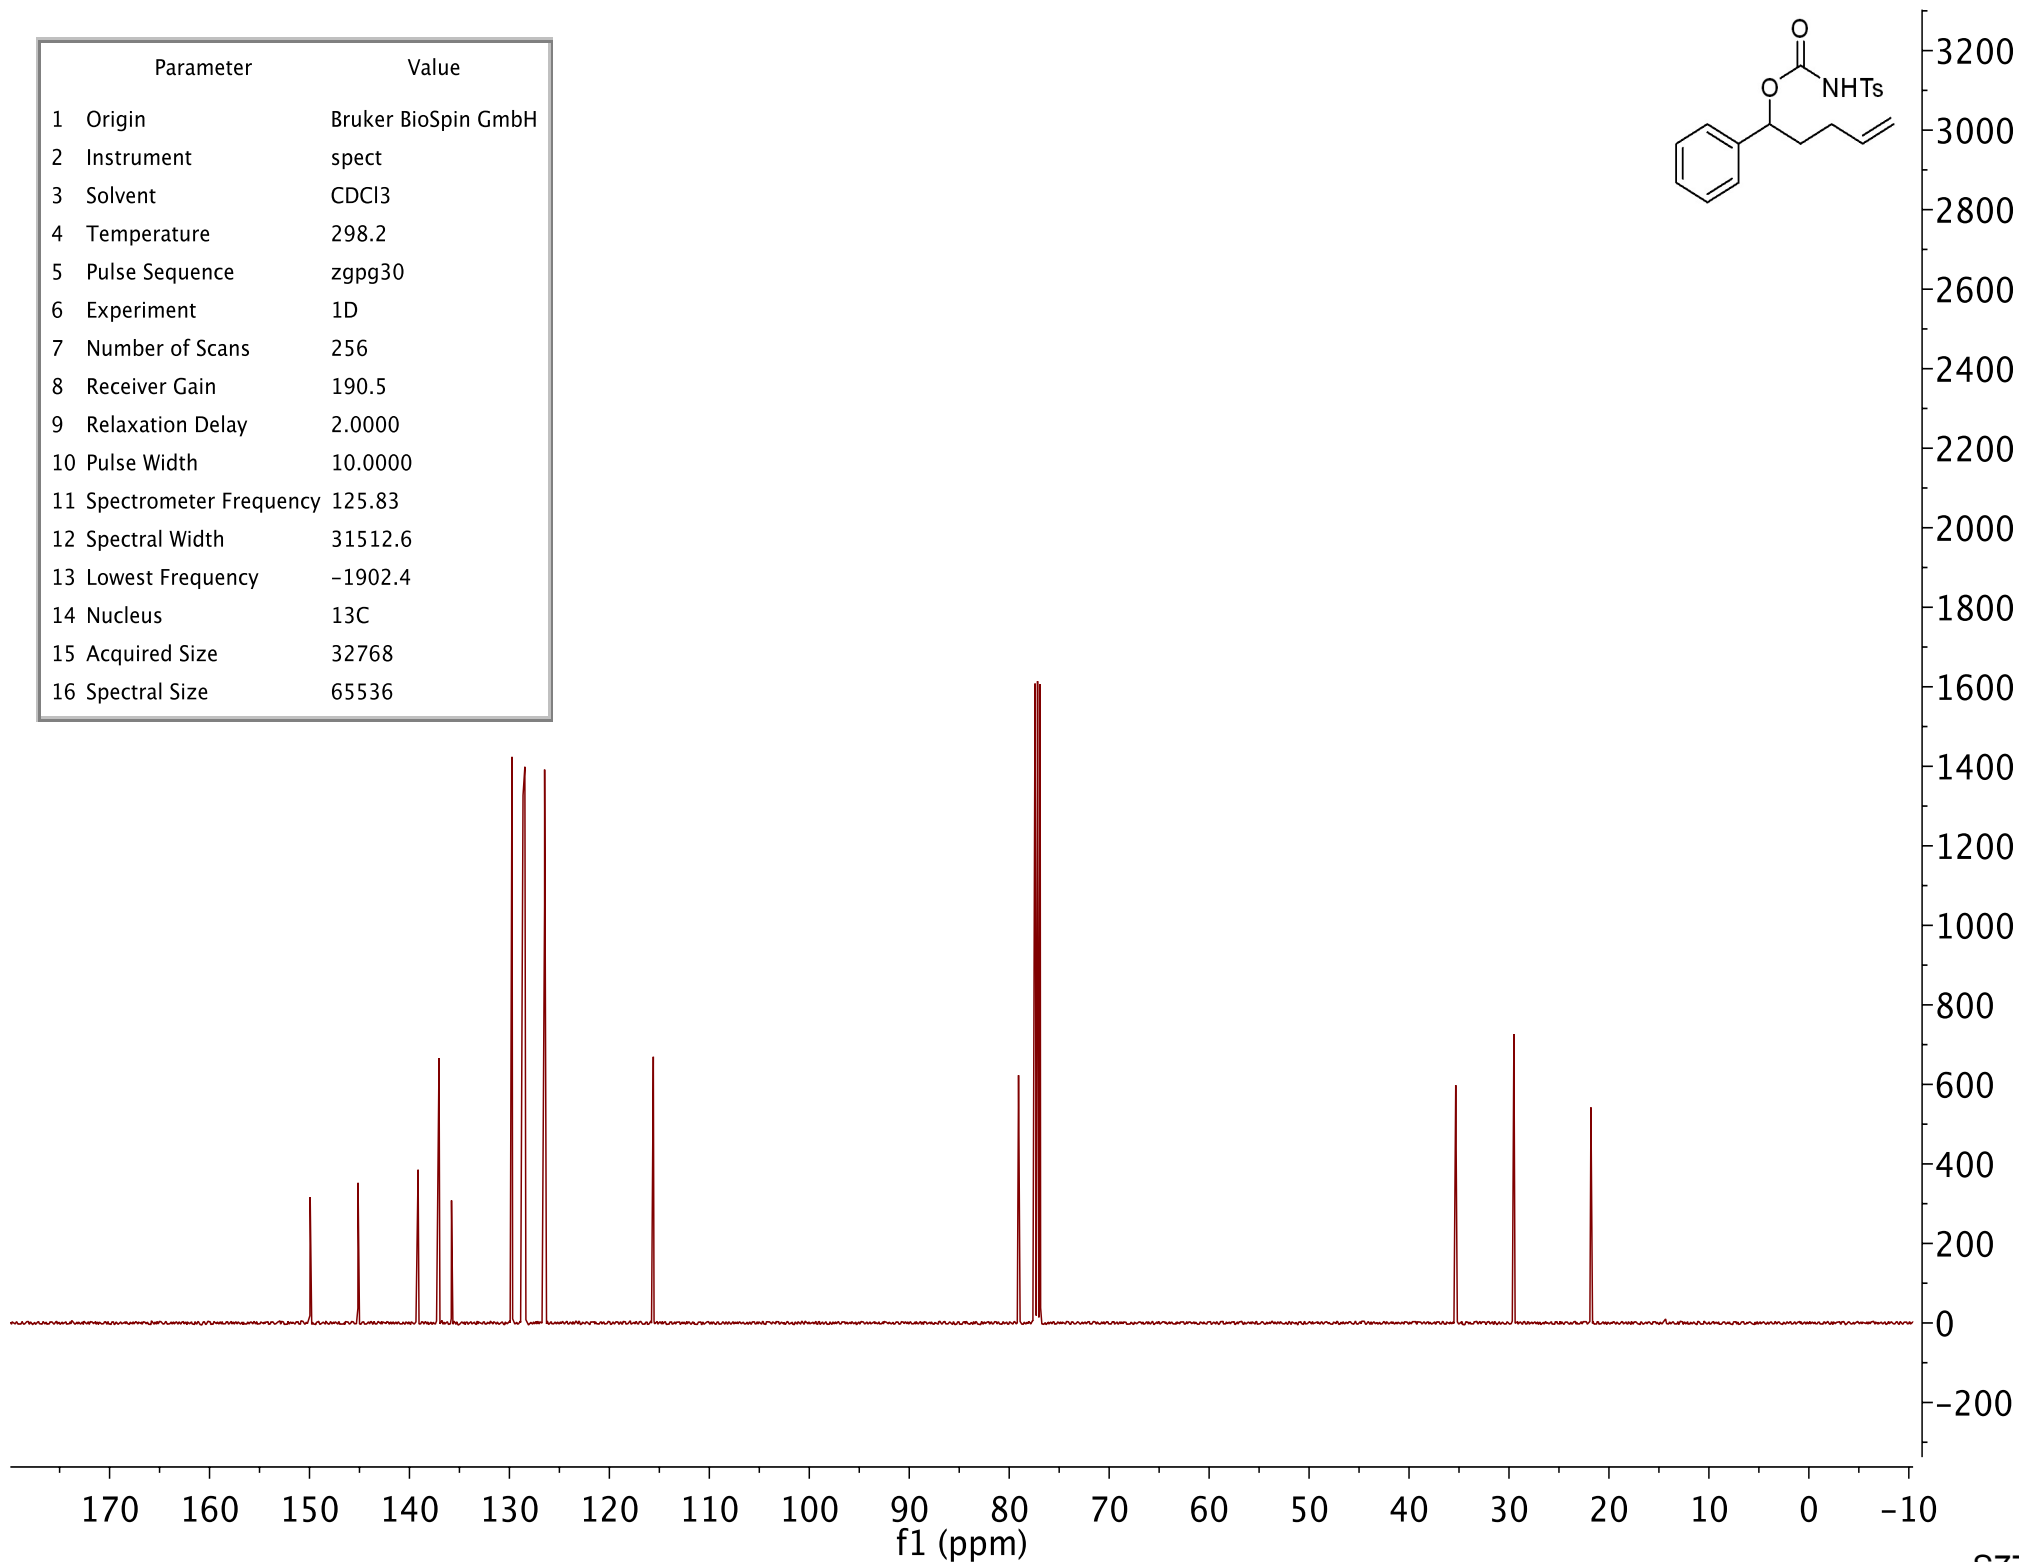

130-125ppm

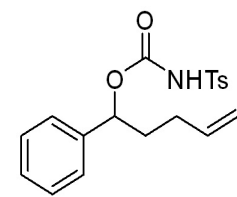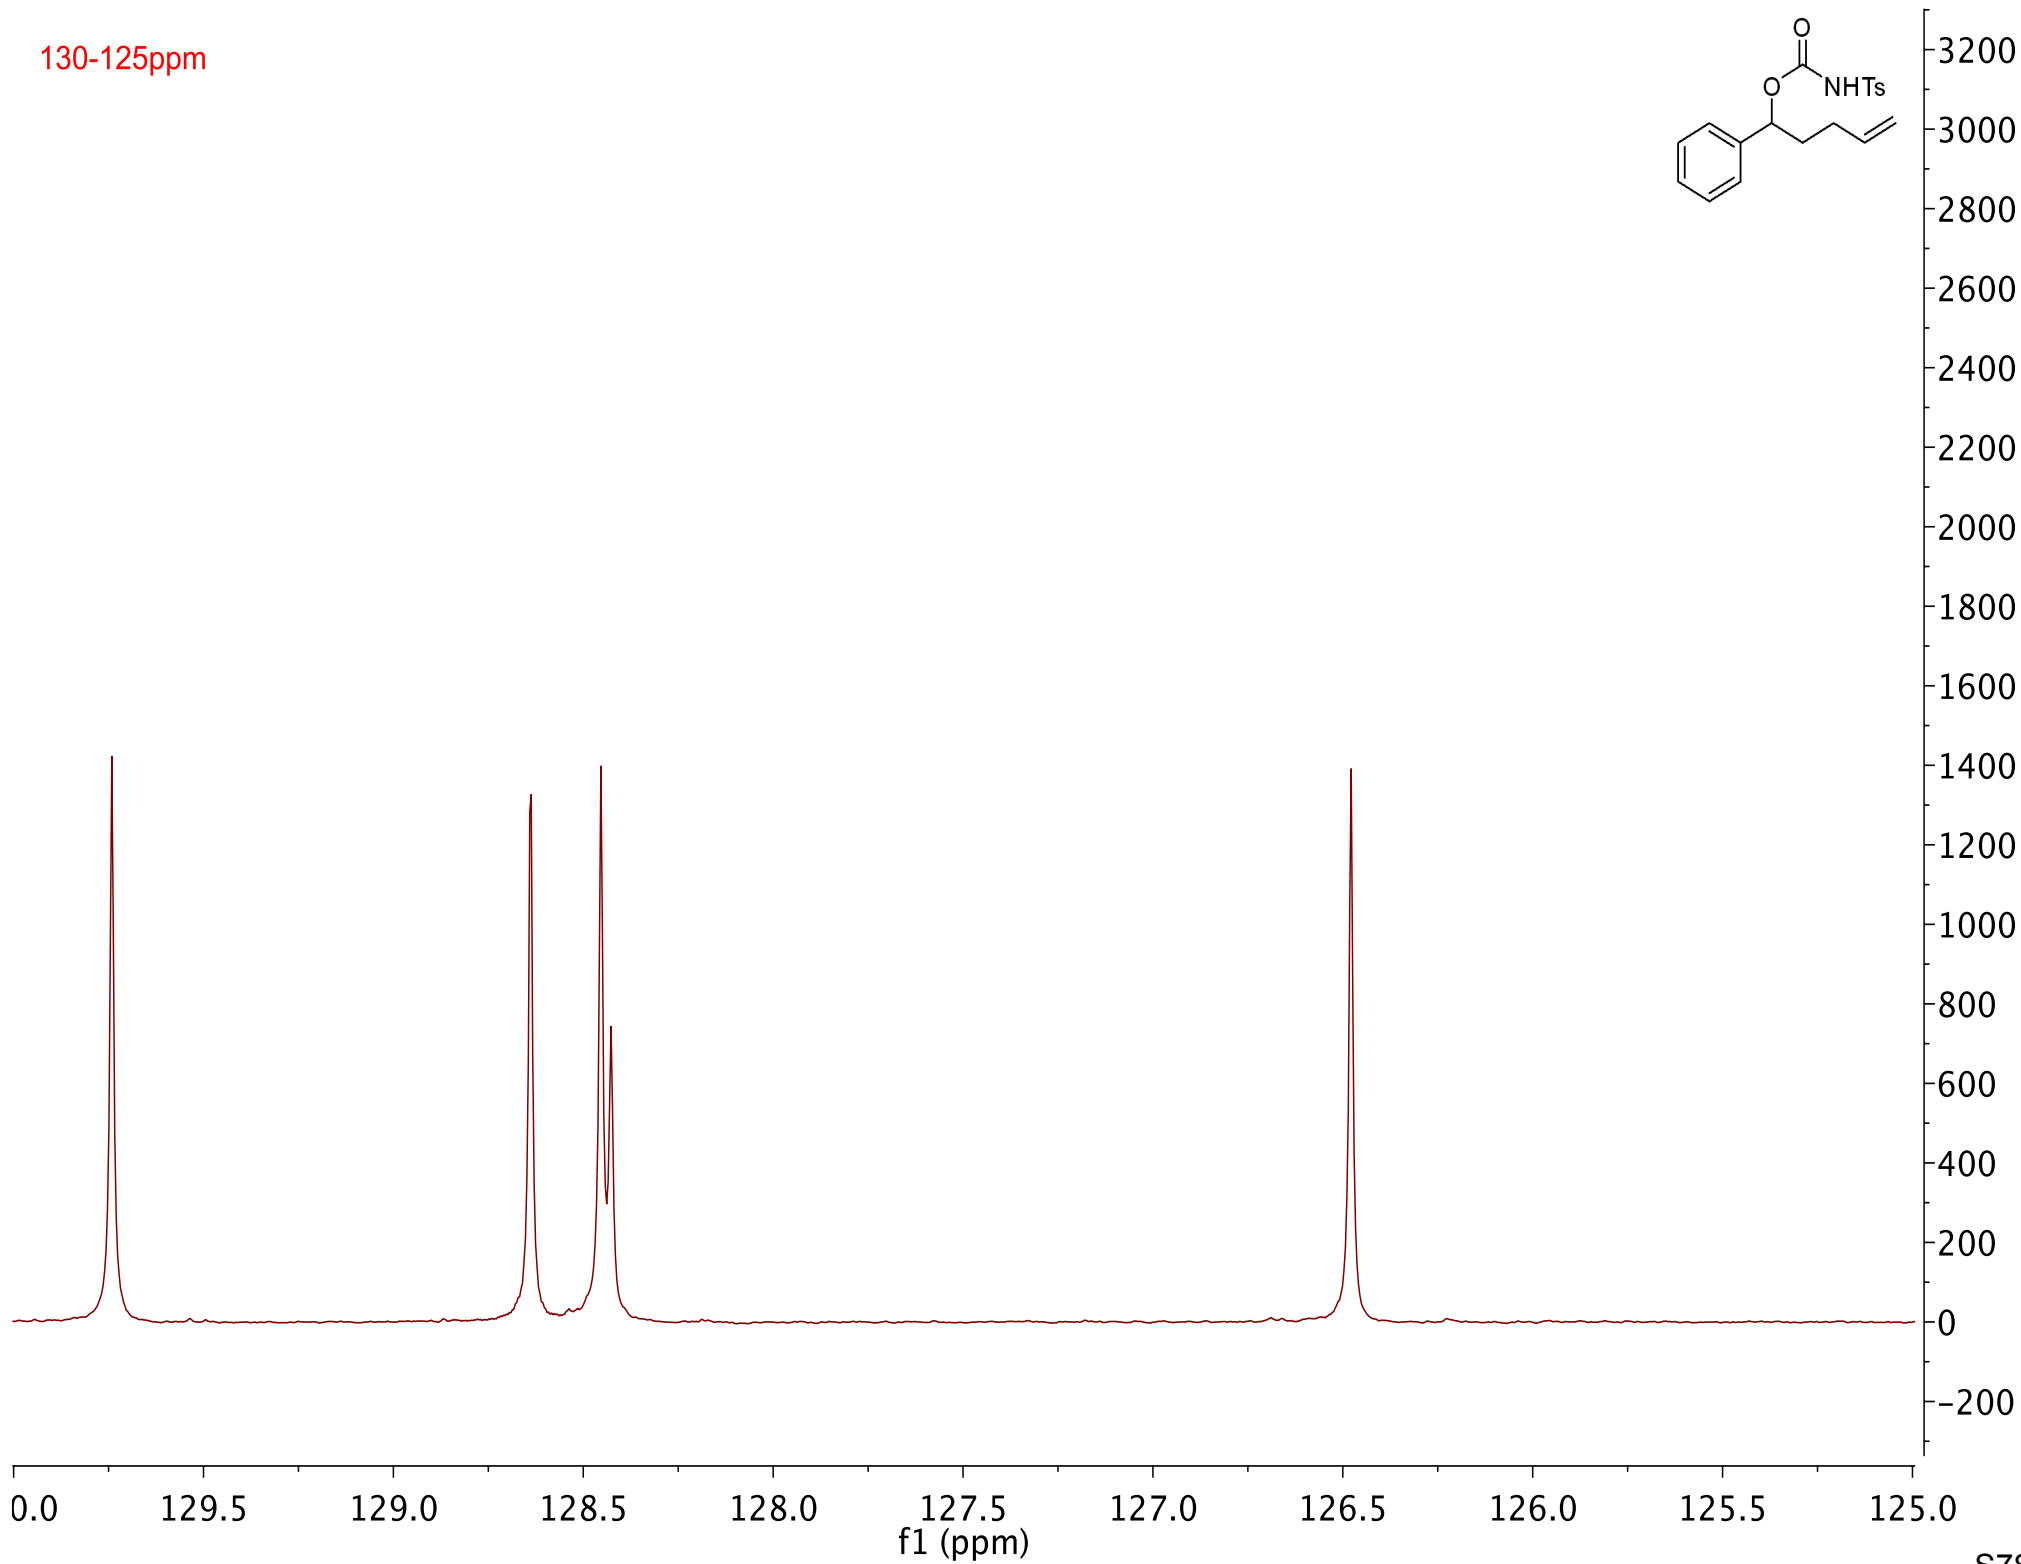



| Parameter                 | Value               |
|---------------------------|---------------------|
| 1 Origin                  | Bruker BioSpin GmbH |
| 2 Instrument              | spect               |
| 3 Solvent                 | CDCl3               |
| 4 Temperature             | 298.1               |
| 5 Pulse Sequence          | zg30                |
| 6 Experiment              | 1D                  |
| 7 Number of Scans         | 16                  |
| 8 Receiver Gain           | 29.7                |
| 9 Relaxation Delay        | 15.0000             |
| 10 Pulse Width            | 12.0000             |
| 11 Spectrometer Frequency | 500.35              |
| 12 Spectral Width         | 10000.0             |
| 13 Lowest Frequency       | -1922.3             |
| 14 Nucleus                | 1H                  |
| 15 Acquired Size          | 32768               |
| 16 Spectral Size          | 65536               |

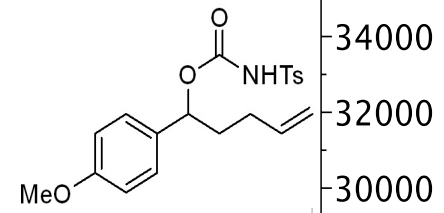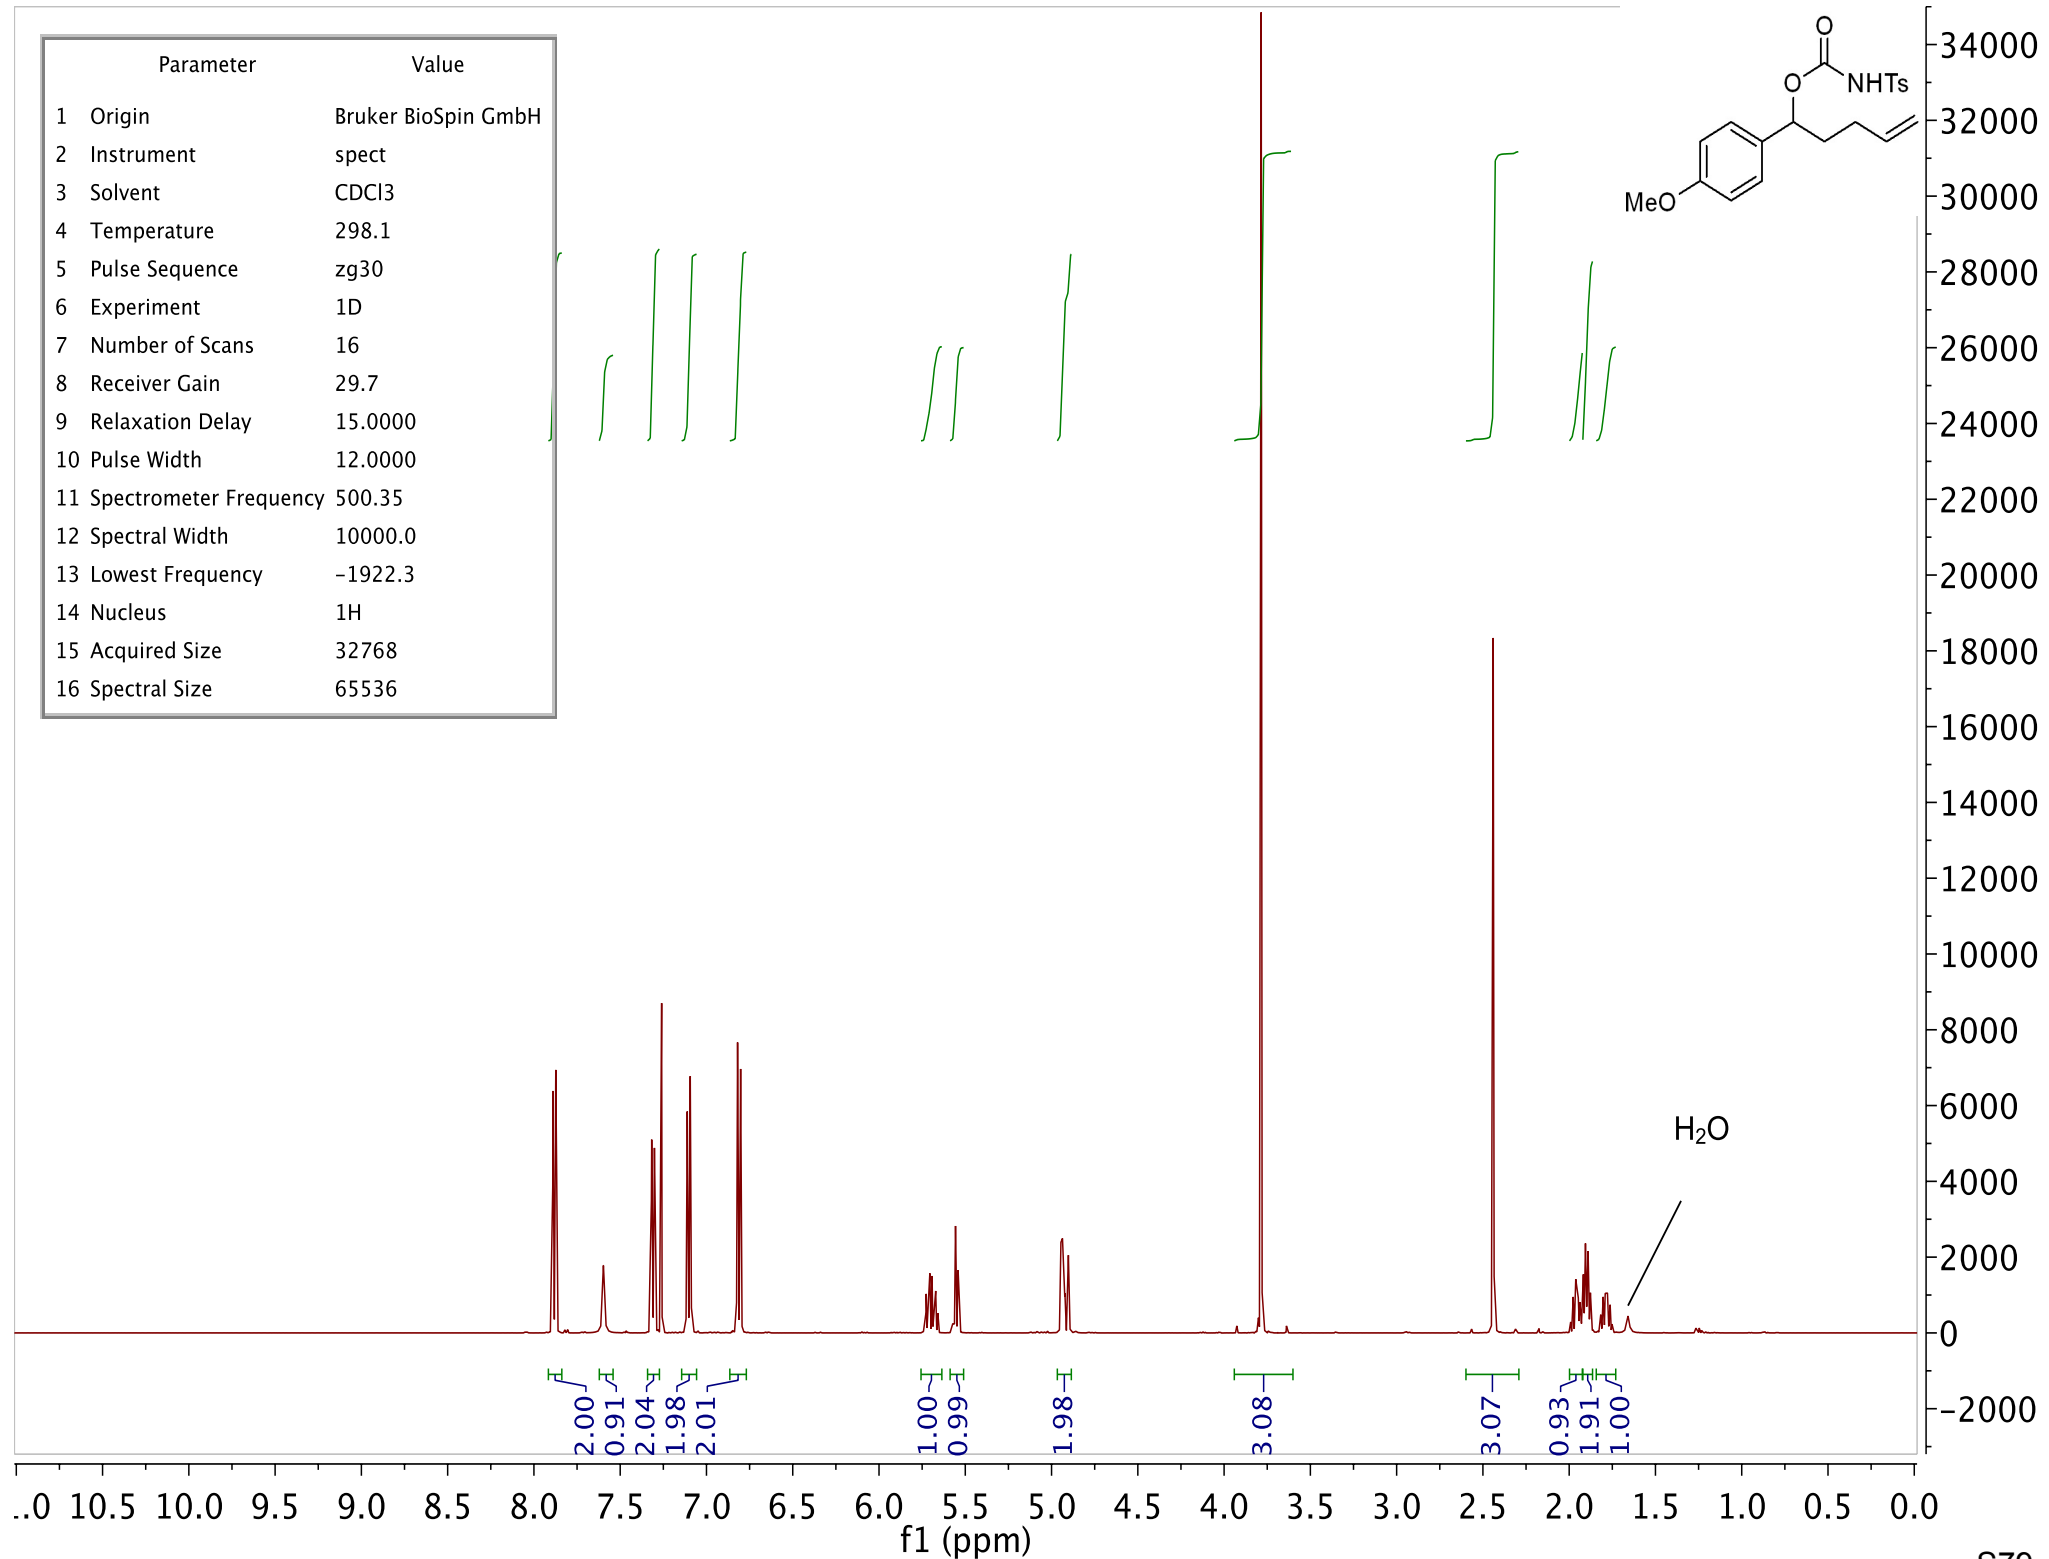

| Parameter                 | Value               |
|---------------------------|---------------------|
| 1 Origin                  | Bruker BioSpin GmbH |
| 2 Instrument              | spect               |
| 3 Solvent                 | CDCl3               |
| 4 Temperature             | 298.1               |
| 5 Pulse Sequence          | zgpg30              |
| 6 Experiment              | 1D                  |
| 7 Number of Scans         | 256                 |
| 8 Receiver Gain           | 190.5               |
| 9 Relaxation Delay        | 2.0000              |
| 10 Pulse Width            | 10.0000             |
| 11 Spectrometer Frequency | 125.83              |
| 12 Spectral Width         | 31512.6             |
| 13 Lowest Frequency       | -1901.4             |
| 14 Nucleus                | 13C                 |
| 15 Acquired Size          | 32768               |
| 16 Spectral Size          | 65536               |

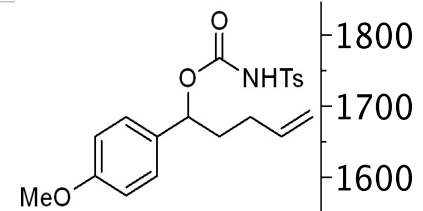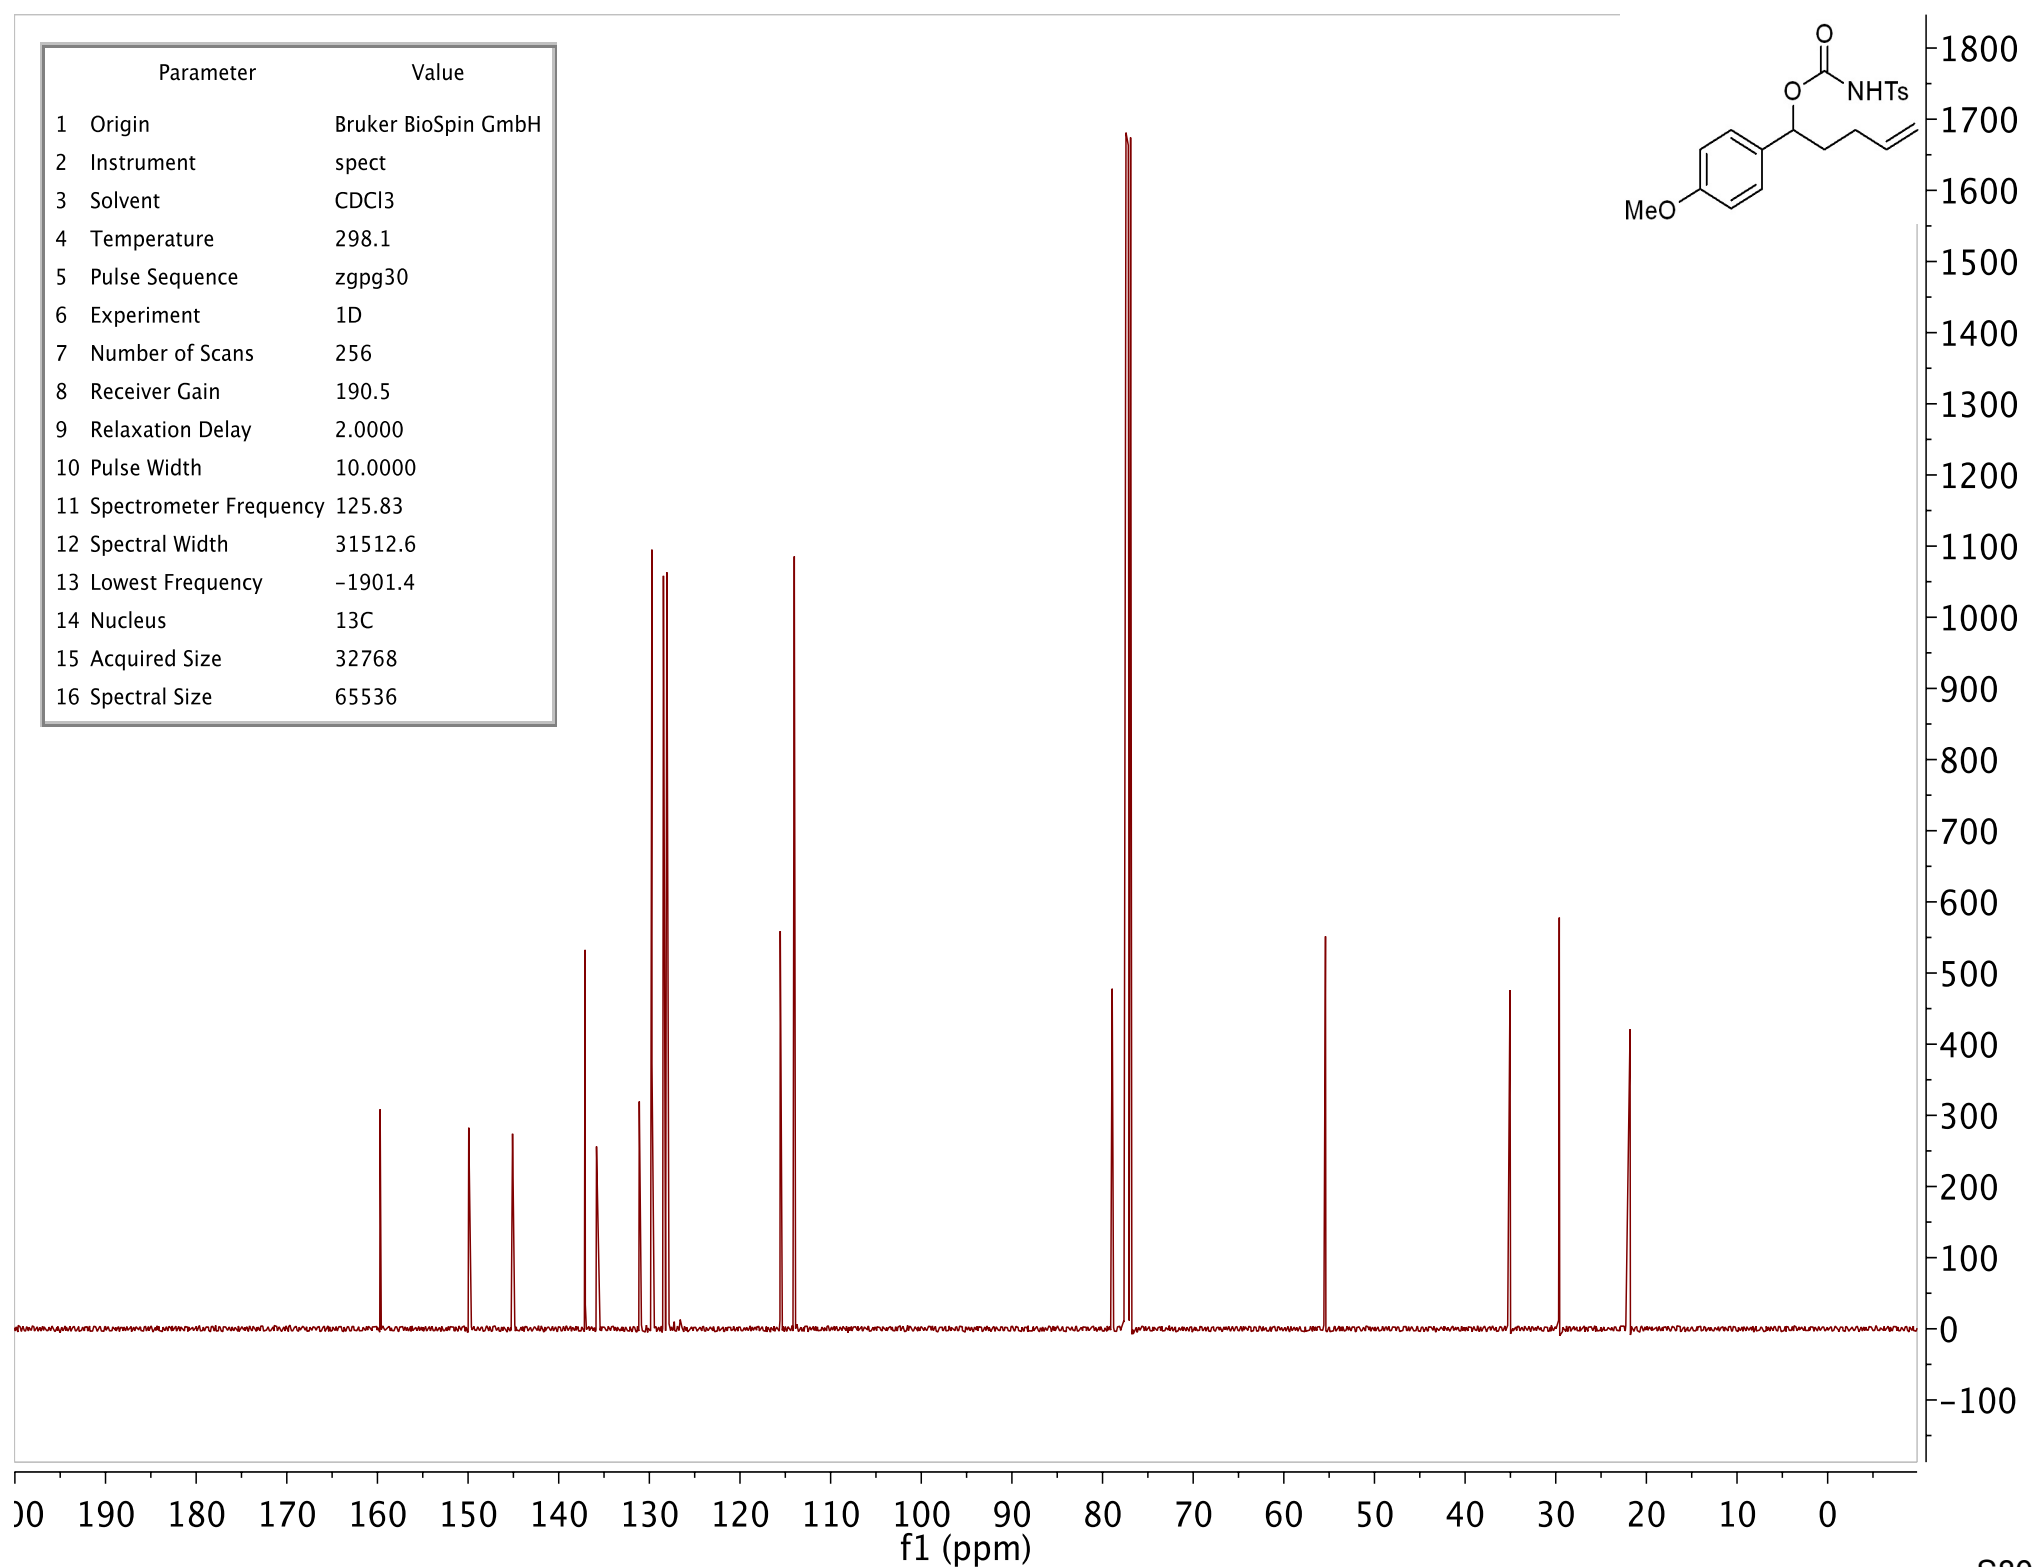

| Parameter                 | Value               |
|---------------------------|---------------------|
| 1 Origin                  | Bruker BioSpin GmbH |
| 2 Instrument              | spect               |
| 3 Solvent                 | CDCl3               |
| 4 Temperature             | 298.2               |
| 5 Pulse Sequence          | zg30                |
| 6 Experiment              | 1D                  |
| 7 Number of Scans         | 16                  |
| 8 Receiver Gain           | 29.7                |
| 9 Relaxation Delay        | 15.0000             |
| 10 Pulse Width            | 12.0000             |
| 11 Spectrometer Frequency | 500.35              |
| 12 Spectral Width         | 10000.0             |
| 13 Lowest Frequency       | -1921.8             |
| 14 Nucleus                | 1H                  |
| 15 Acquired Size          | 32768               |
| 16 Spectral Size          | 65536               |

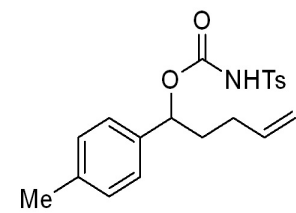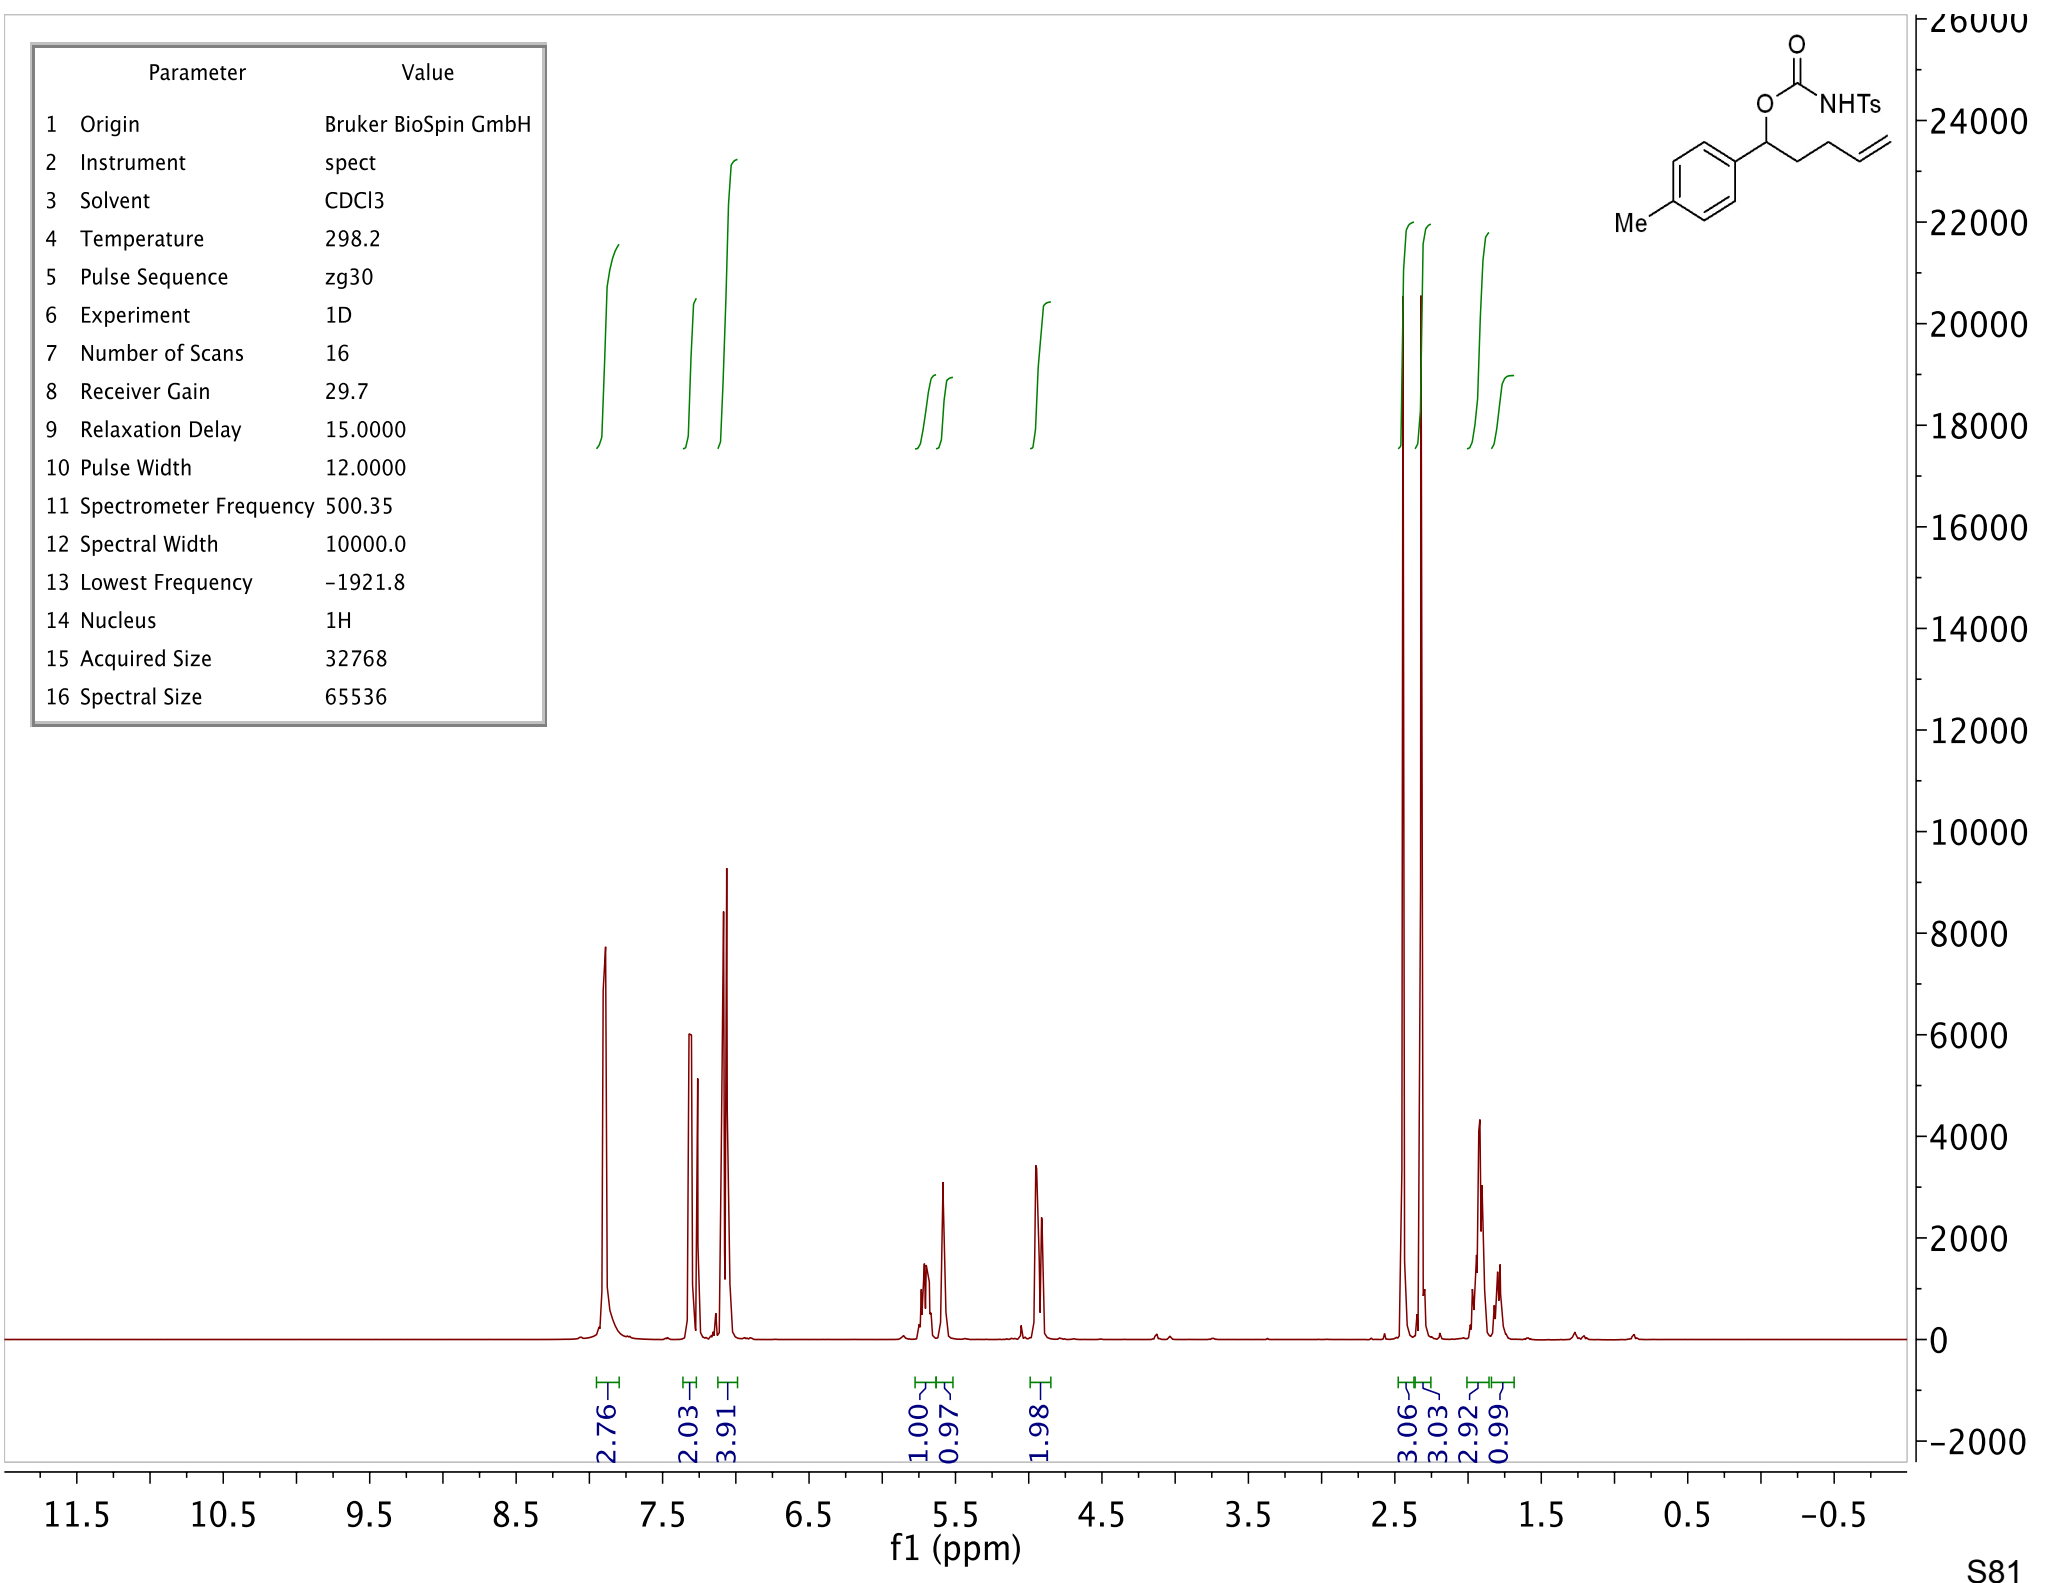

| Parameter                 | Value               |
|---------------------------|---------------------|
| 1 Origin                  | Bruker BioSpin GmbH |
| 2 Instrument              | spect               |
| 3 Solvent                 | CDCl3               |
| 4 Temperature             | 298.2               |
| 5 Pulse Sequence          | zgpg30              |
| 6 Experiment              | 1D                  |
| 7 Number of Scans         | 256                 |
| 8 Receiver Gain           | 190.5               |
| 9 Relaxation Delay        | 2.0000              |
| 10 Pulse Width            | 10.0000             |
| 11 Spectrometer Frequency | 125.83              |
| 12 Spectral Width         | 31512.6             |
| 13 Lowest Frequency       | -1906.0             |
| 14 Nucleus                | <sup>13</sup> C     |
| 15 Acquired Size          | 32768               |
| 16 Spectral Size          | 65536               |

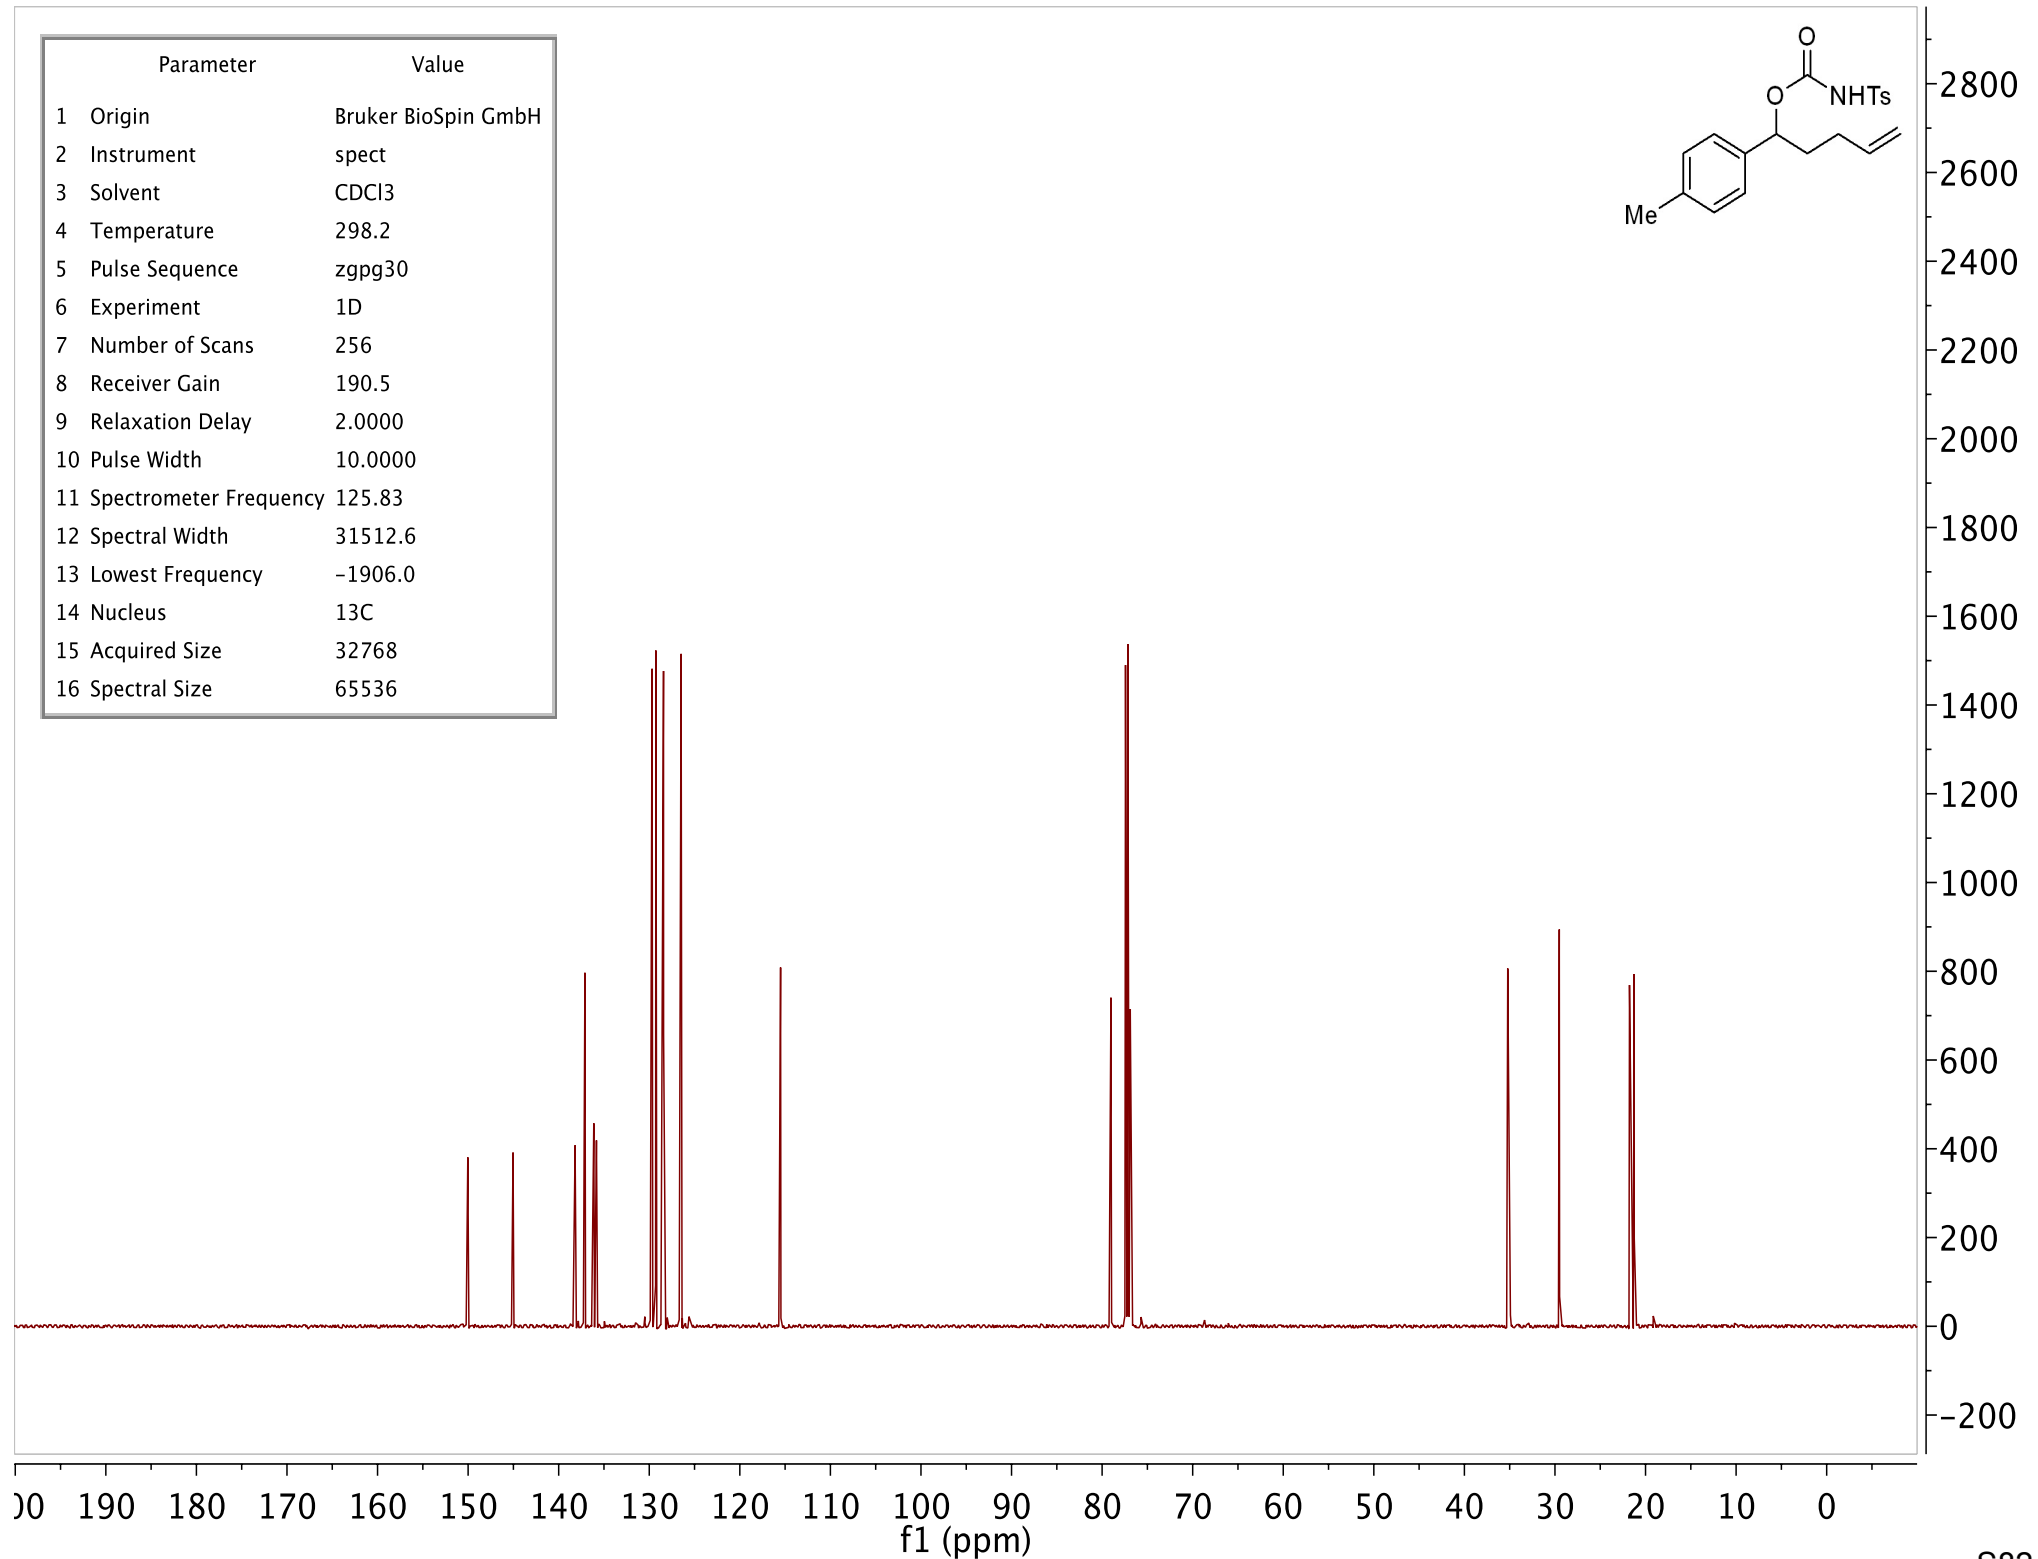

| Parameter                 | Value               |
|---------------------------|---------------------|
| 1 Origin                  | Bruker BioSpin GmbH |
| 2 Instrument              | spect               |
| 3 Solvent                 | CDCl3               |
| 4 Temperature             | 298.0               |
| 5 Pulse Sequence          | zg30                |
| 6 Experiment              | 1D                  |
| 7 Number of Scans         | 16                  |
| 8 Receiver Gain           | 107.0               |
| 9 Relaxation Delay        | 15.0000             |
| 10 Pulse Width            | 12.0000             |
| 11 Spectrometer Frequency | 500.35              |
| 12 Spectral Width         | 10000.0             |
| 13 Lowest Frequency       | -1922.8             |
| 14 Nucleus                | 1H                  |
| 15 Acquired Size          | 32768               |
| 16 Spectral Size          | 65536               |

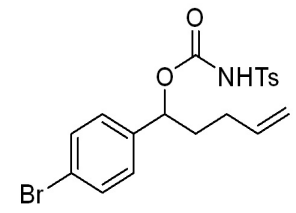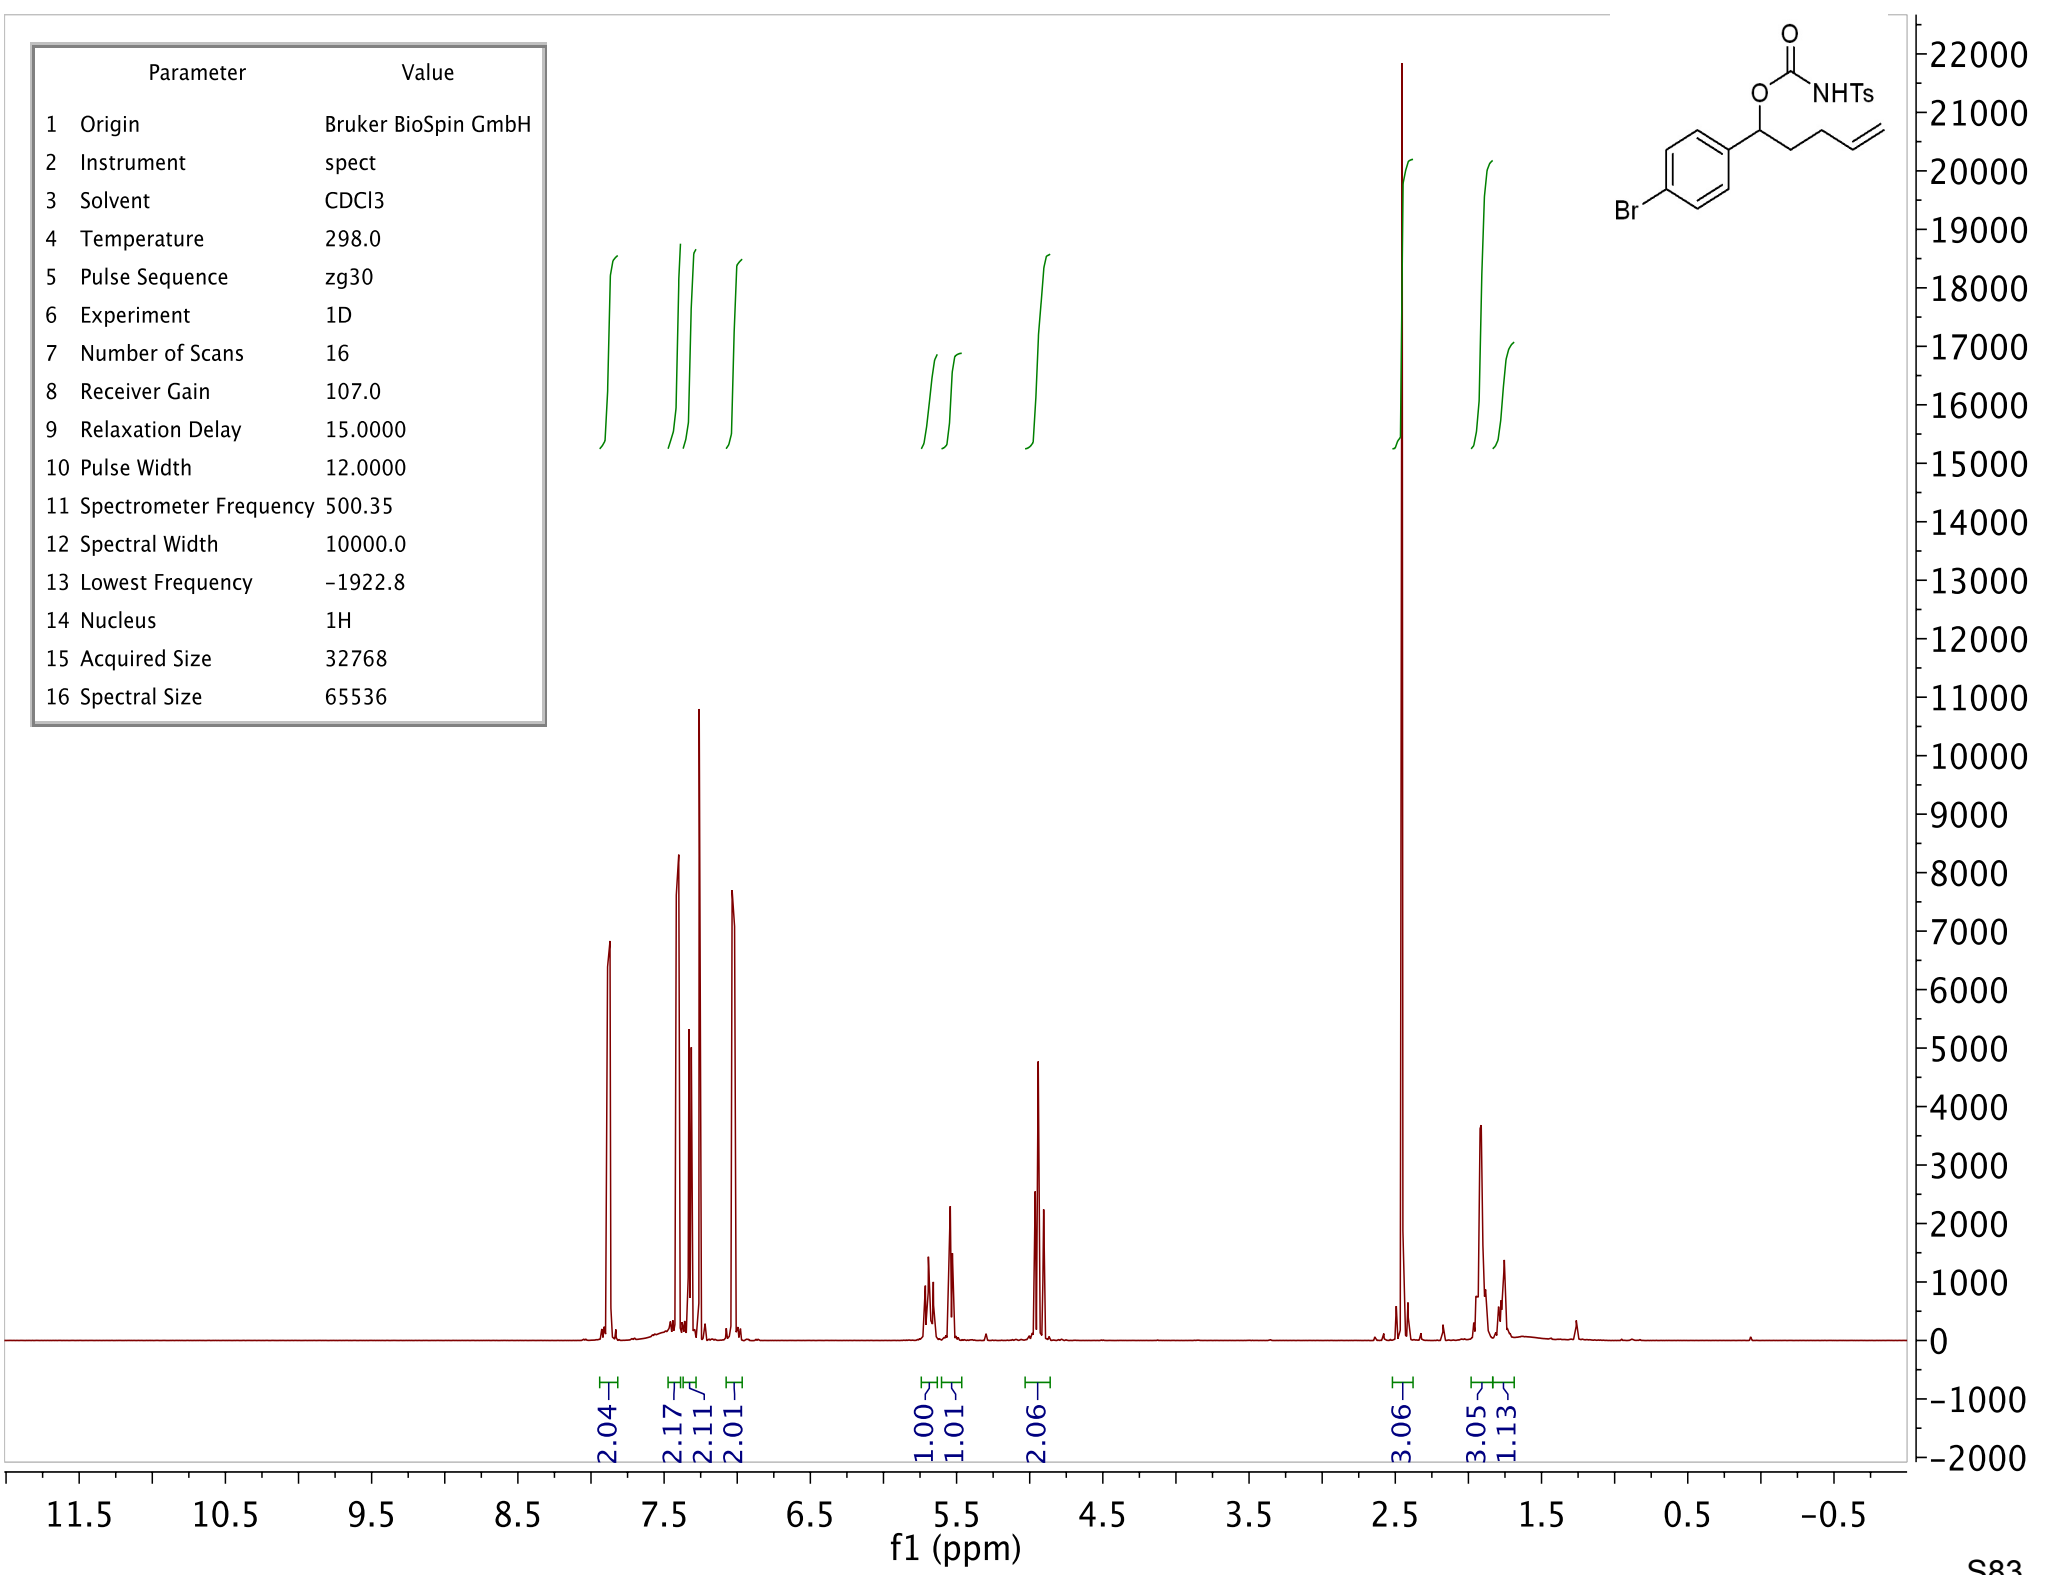

| Parameter                 | Value               |
|---------------------------|---------------------|
| 1 Origin                  | Bruker BioSpin GmbH |
| 2 Instrument              | spect               |
| 3 Solvent                 | CDCl3               |
| 4 Temperature             | 298.0               |
| 5 Pulse Sequence          | zgpg30              |
| 6 Experiment              | 1D                  |
| 7 Number of Scans         | 2048                |
| 8 Receiver Gain           | 190.5               |
| 9 Relaxation Delay        | 2.0000              |
| 10 Pulse Width            | 10.0000             |
| 11 Spectrometer Frequency | 125.83              |
| 12 Spectral Width         | 31512.6             |
| 13 Lowest Frequency       | -1899.7             |
| 14 Nucleus                | 13C                 |
| 15 Acquired Size          | 32768               |
| 16 Spectral Size          | 65536               |

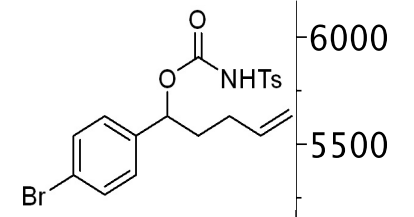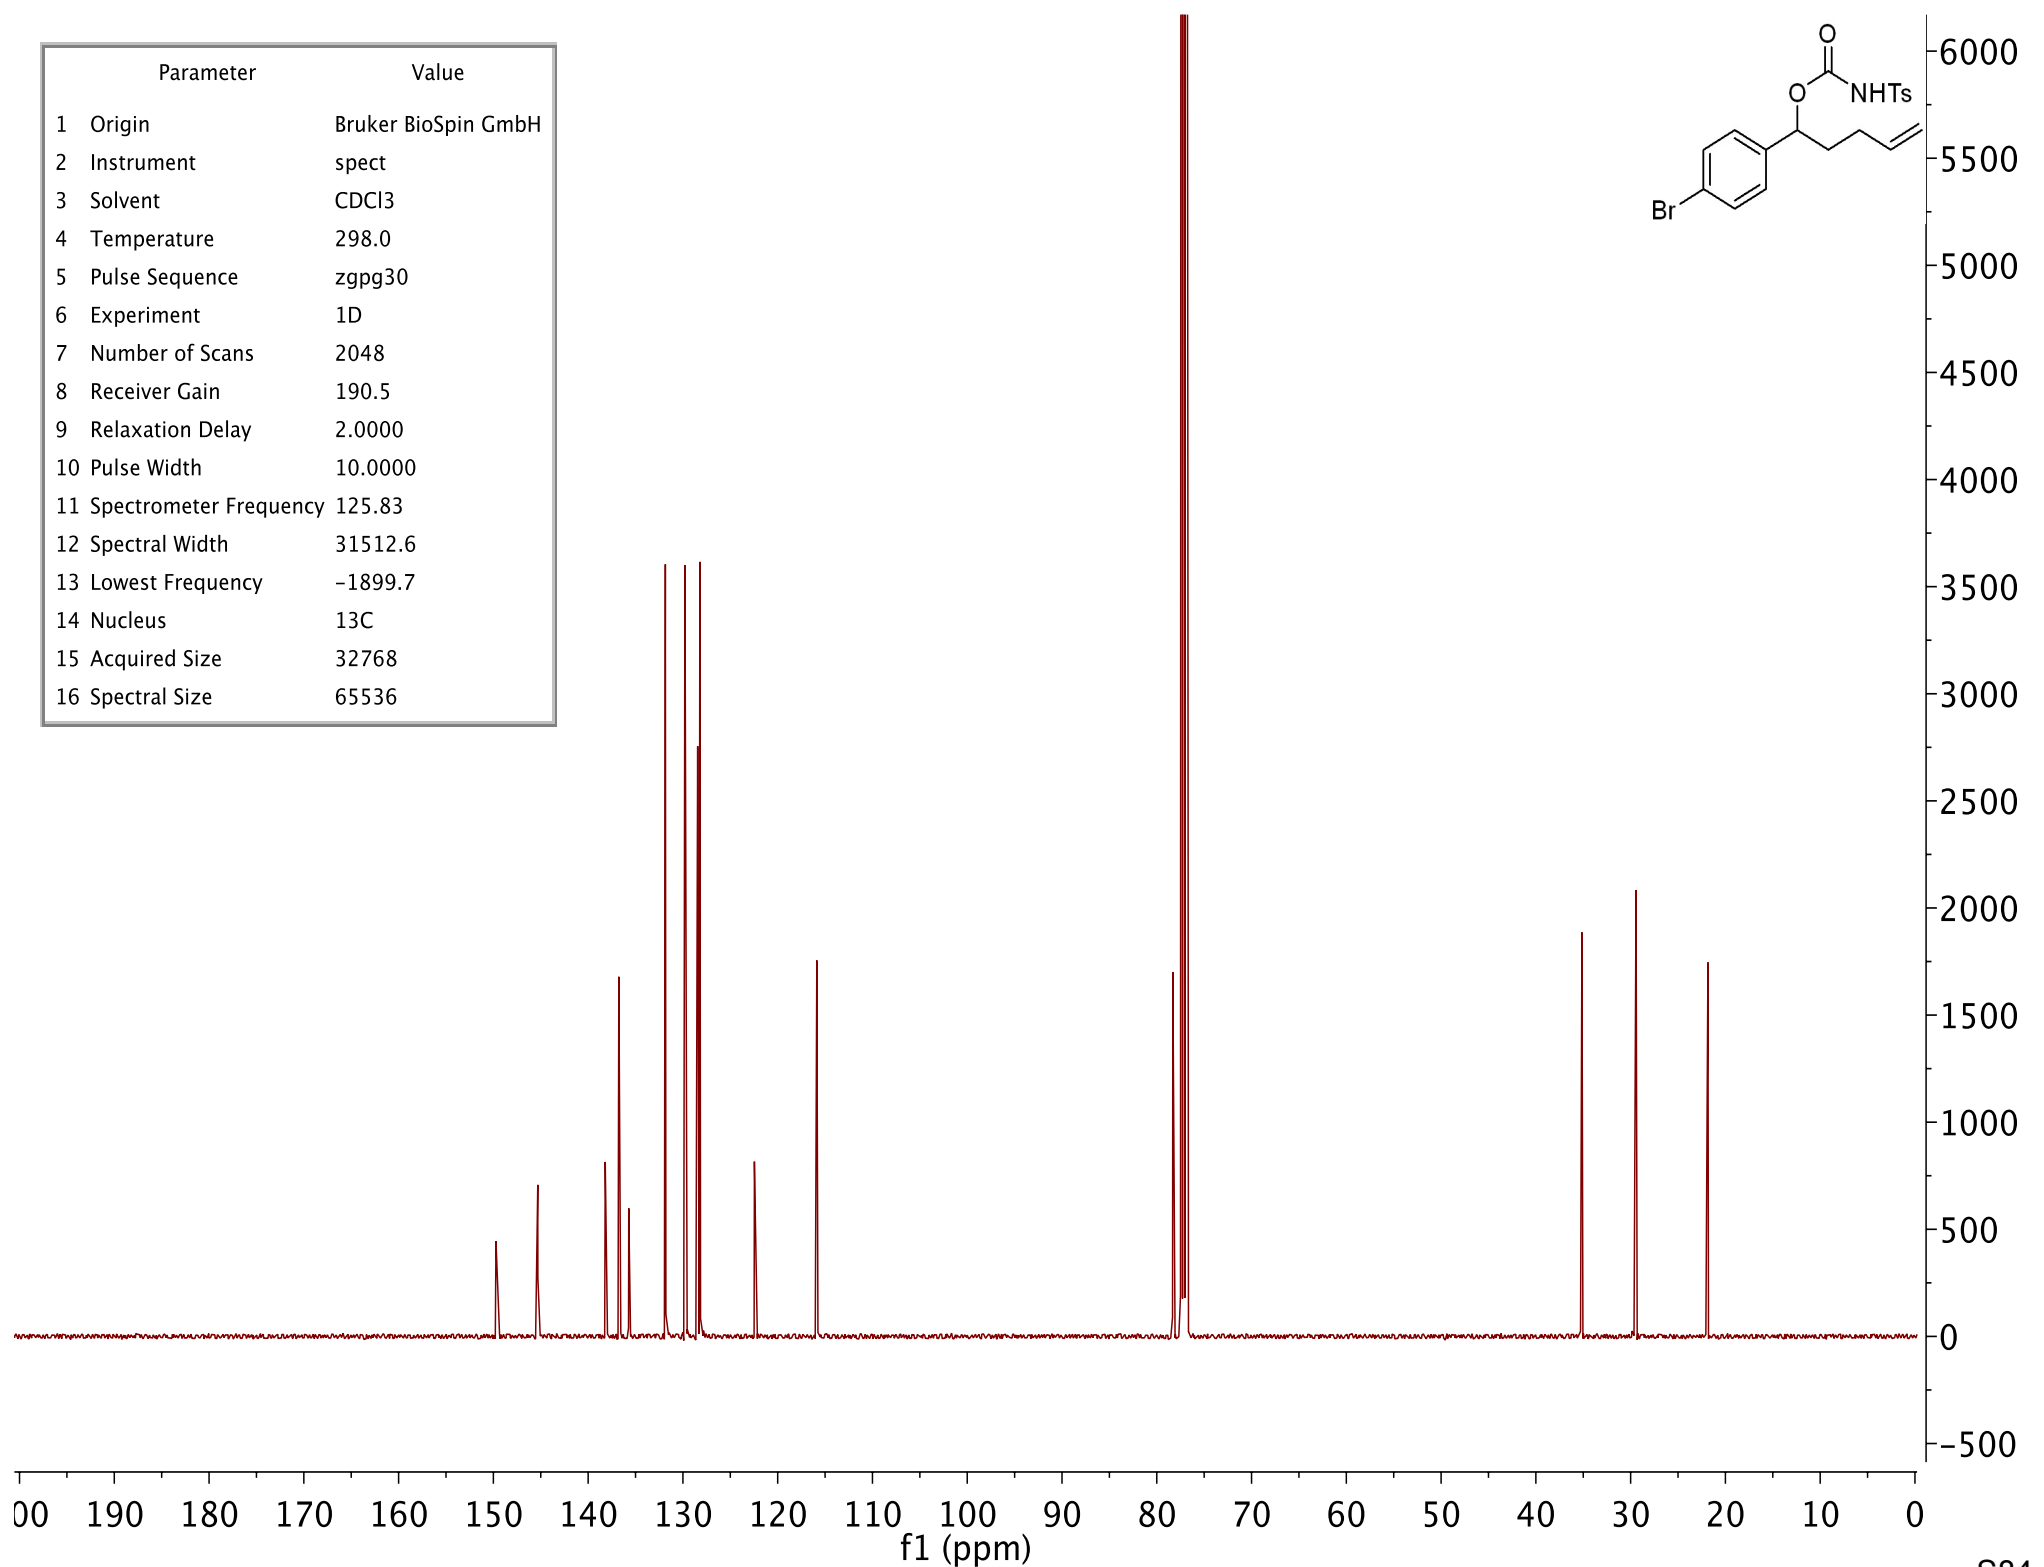

160-100ppm

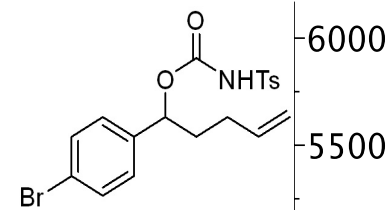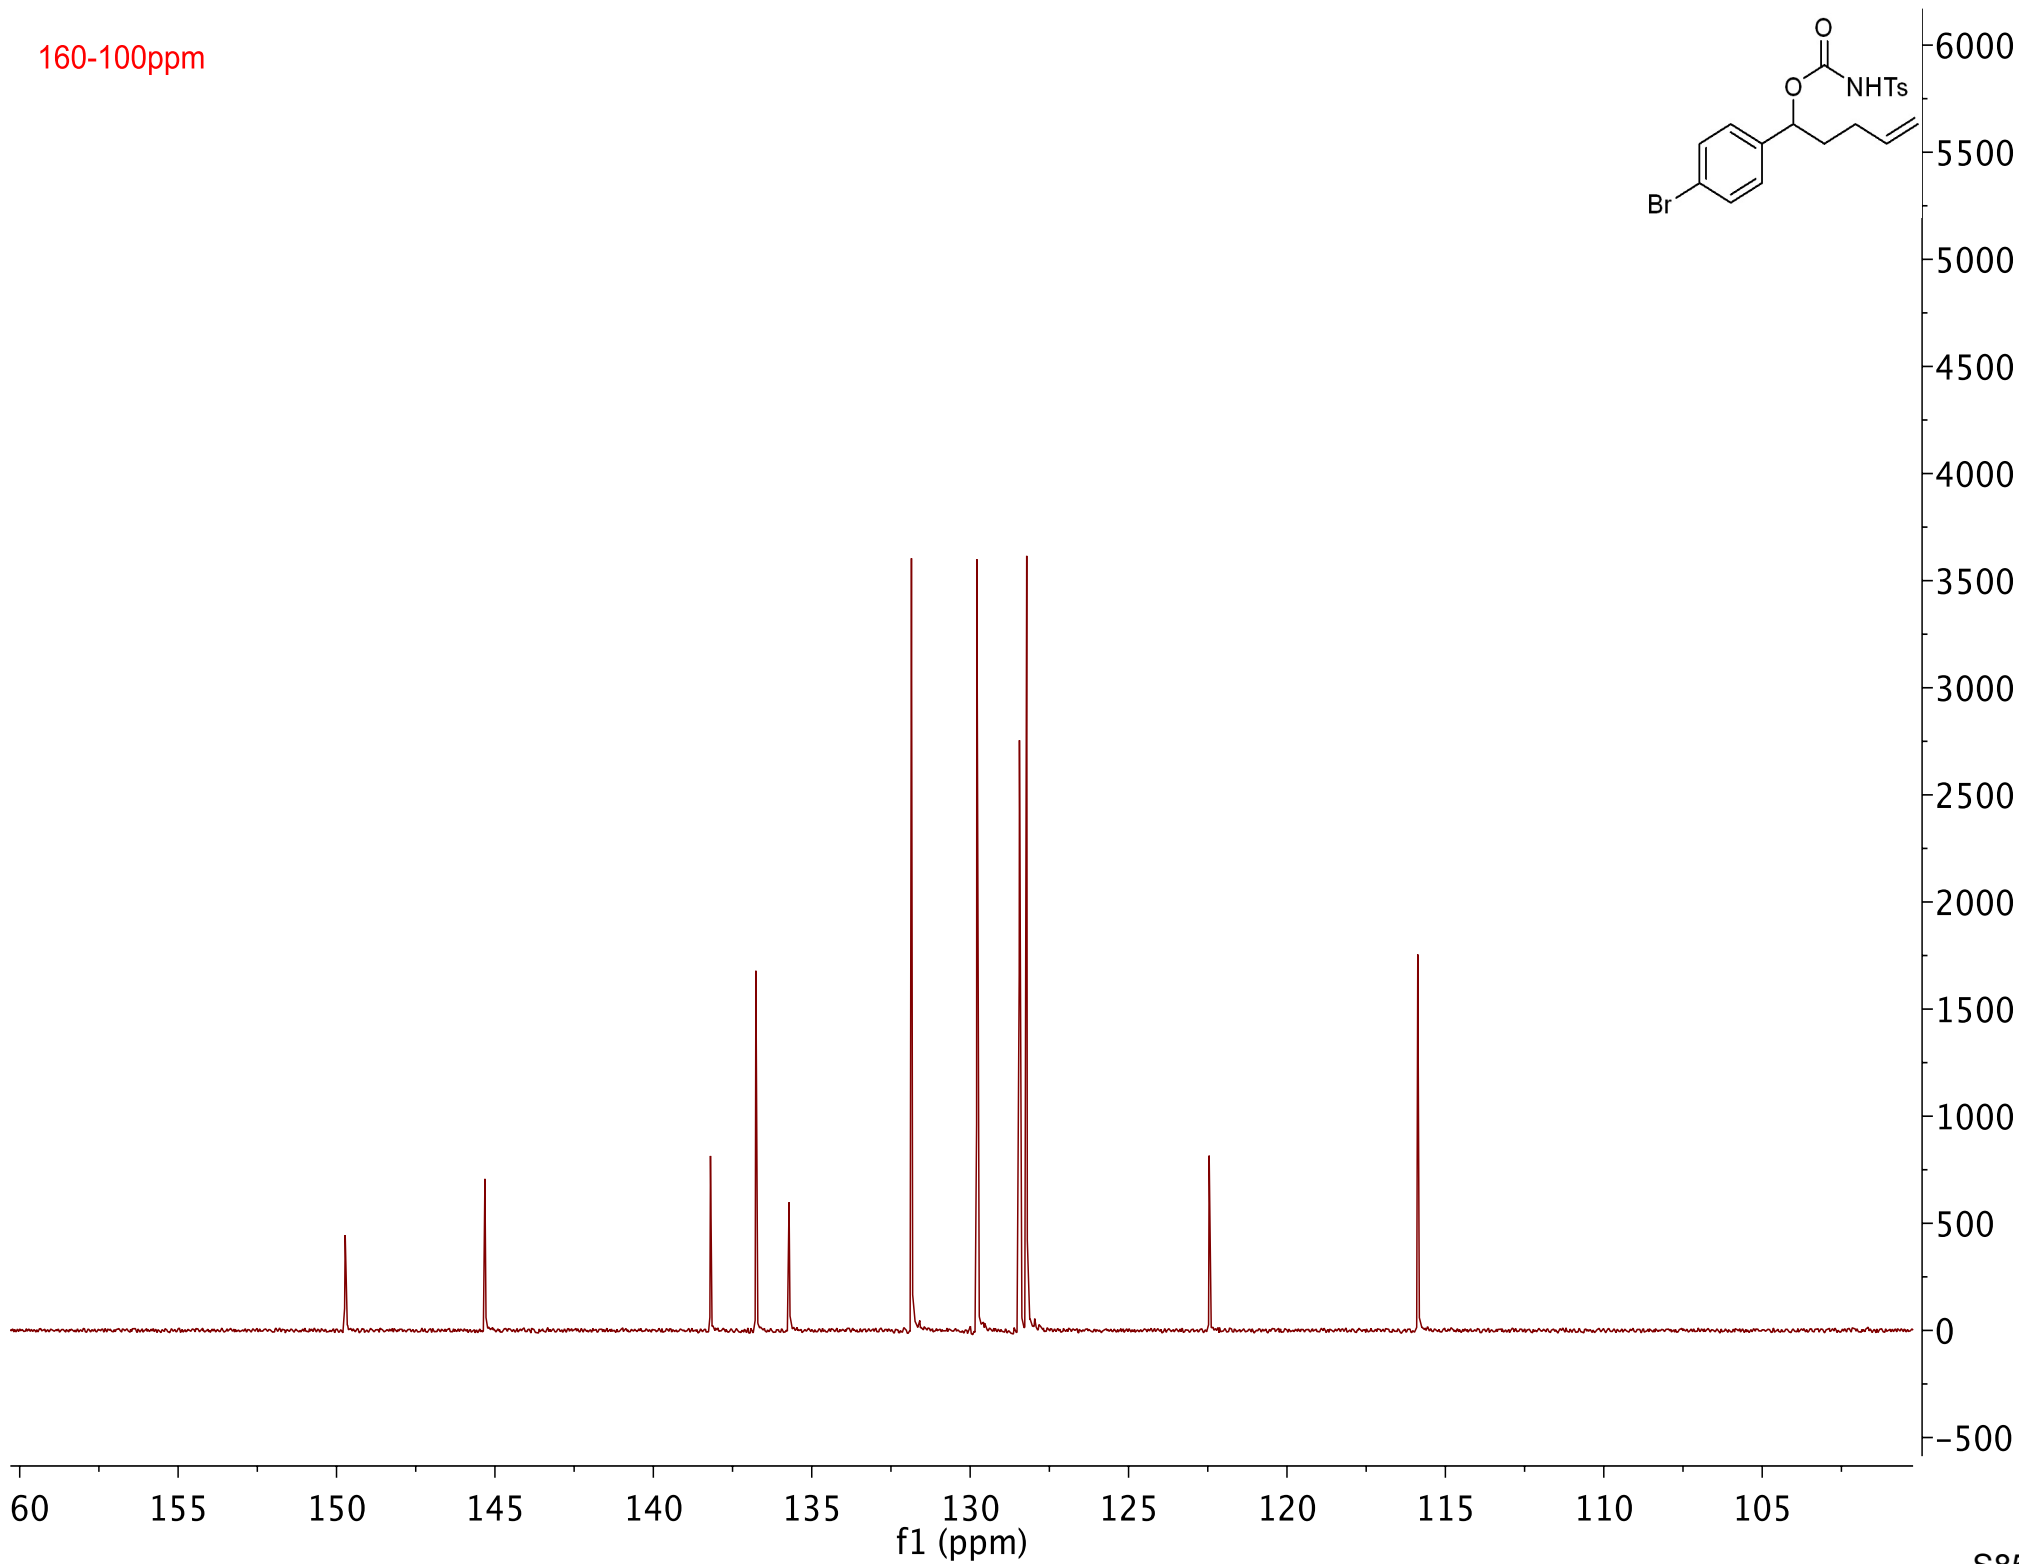

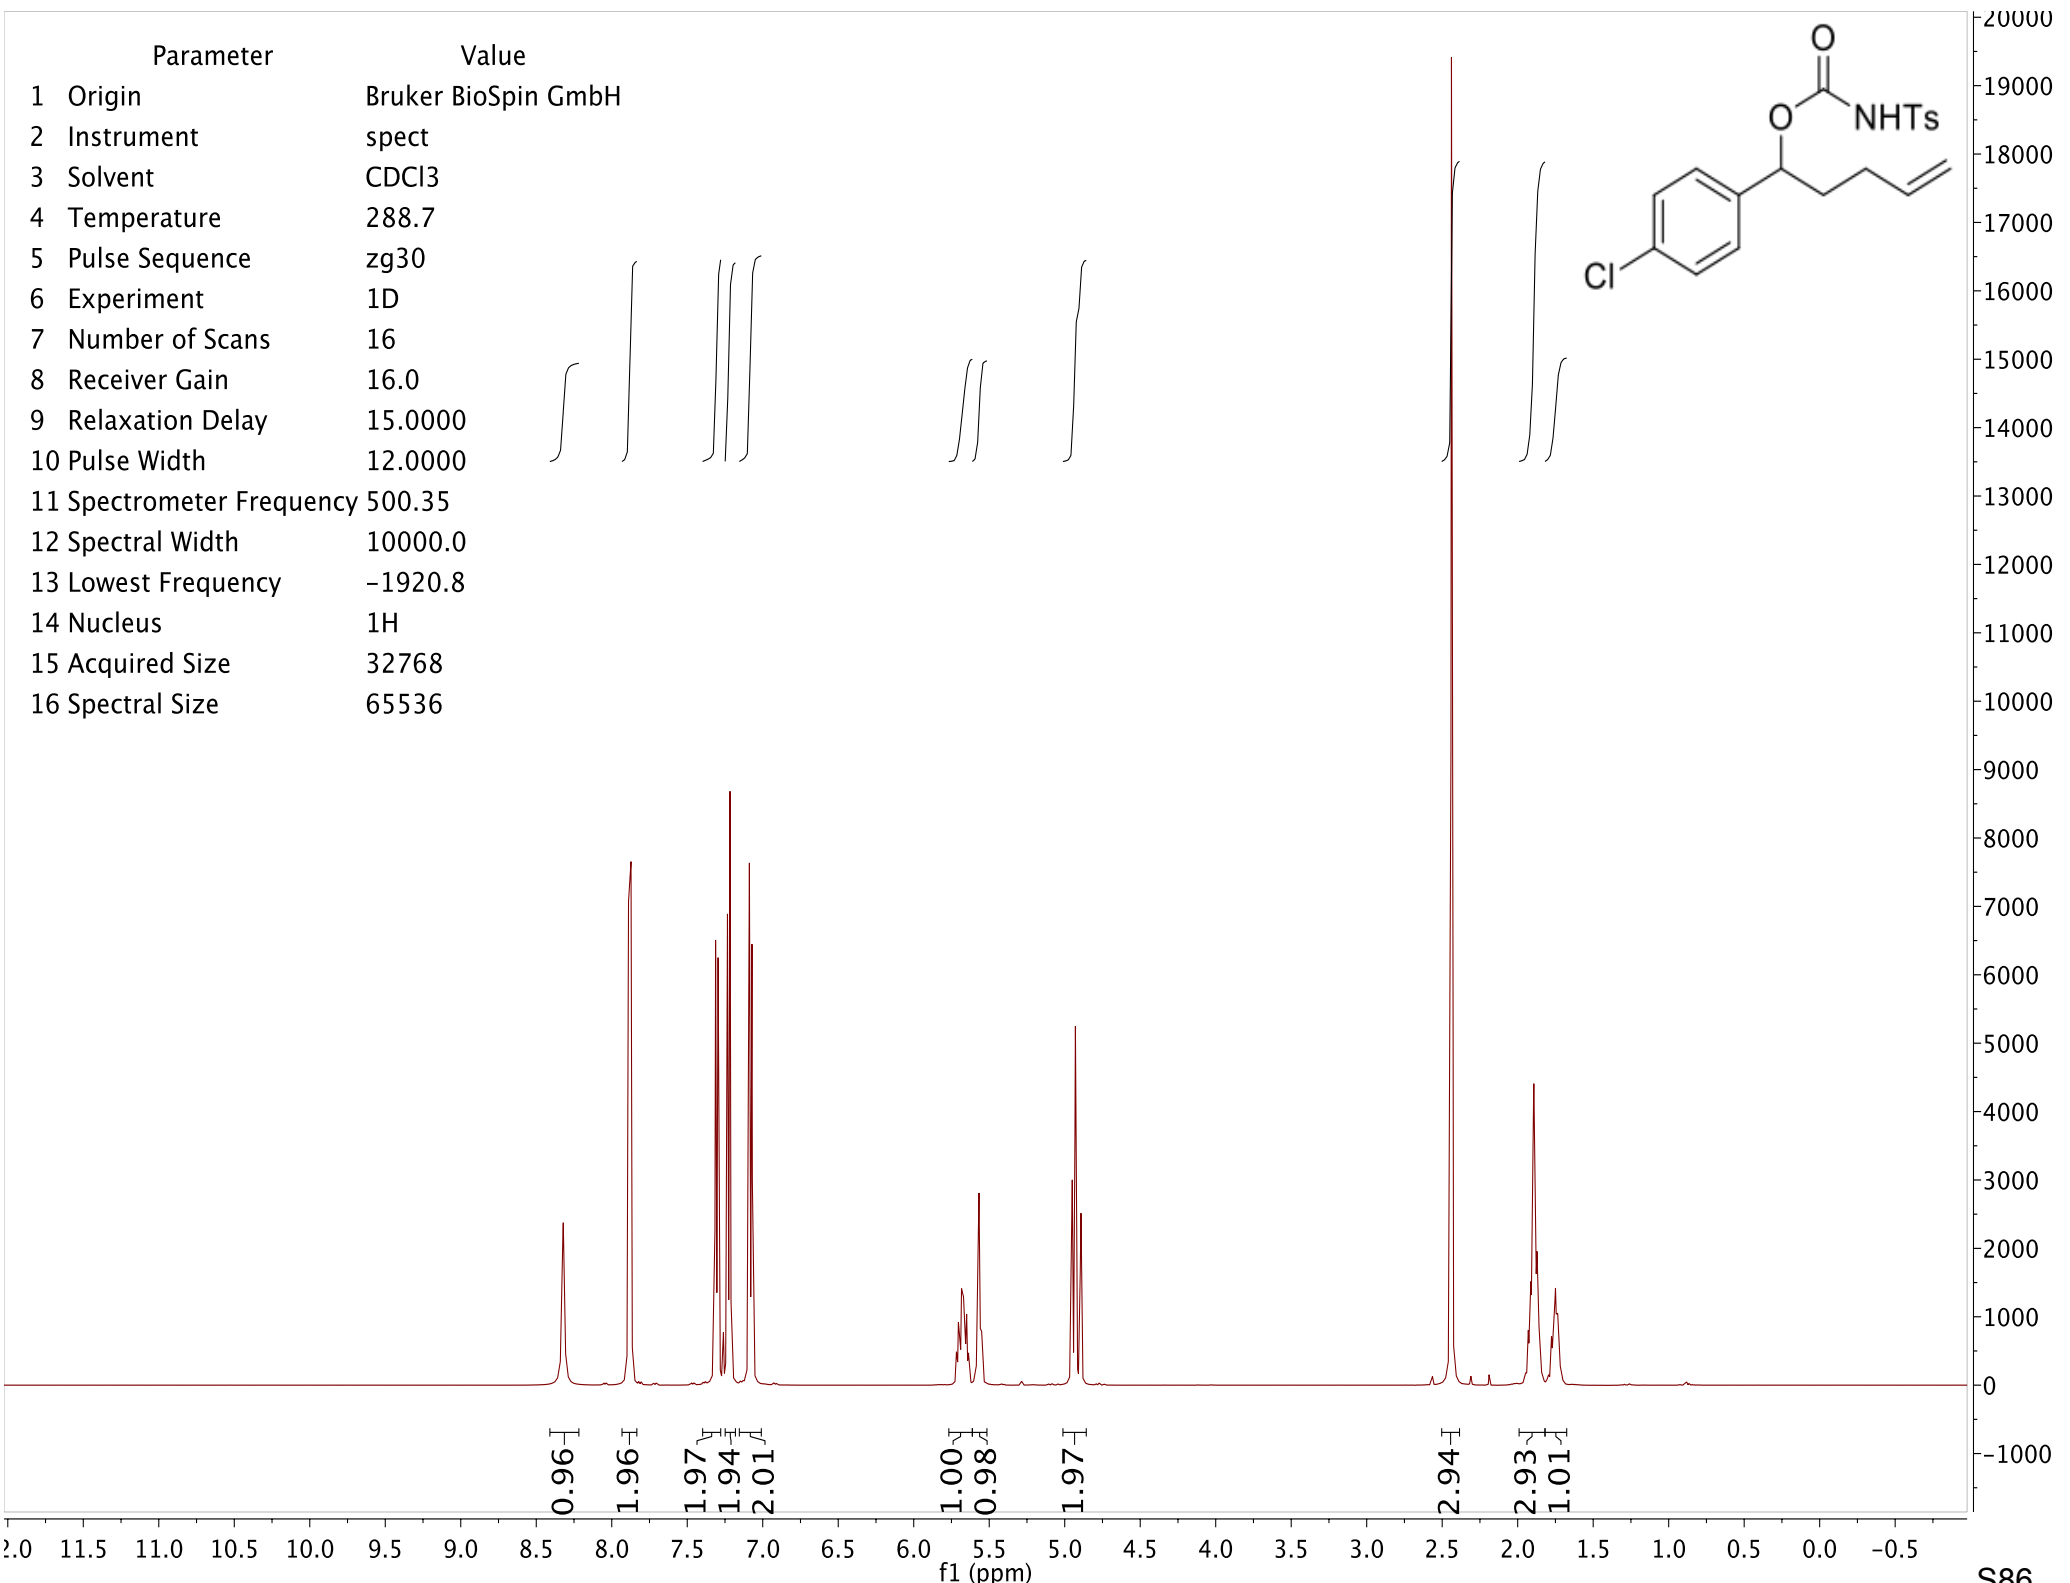



| Parameter                 | Value               |
|---------------------------|---------------------|
| 1 Origin                  | Bruker BioSpin GmbH |
| 2 Instrument              | spect               |
| 3 Solvent                 | CDCl3               |
| 4 Temperature             | 288.7               |
| 5 Pulse Sequence          | zgpg30              |
| 6 Experiment              | 1D                  |
| 7 Number of Scans         | 256                 |
| 8 Receiver Gain           | 190.5               |
| 9 Relaxation Delay        | 2.0000              |
| 10 Pulse Width            | 10.0000             |
| 11 Spectrometer Frequency | 125.83              |
| 12 Spectral Width         | 31512.6             |
| 13 Lowest Frequency       | -1914.2             |
| 14 Nucleus                | 13C                 |
| 15 Acquired Size          | 32768               |
| 16 Spectral Size          | 65536               |

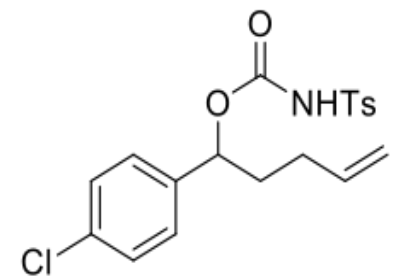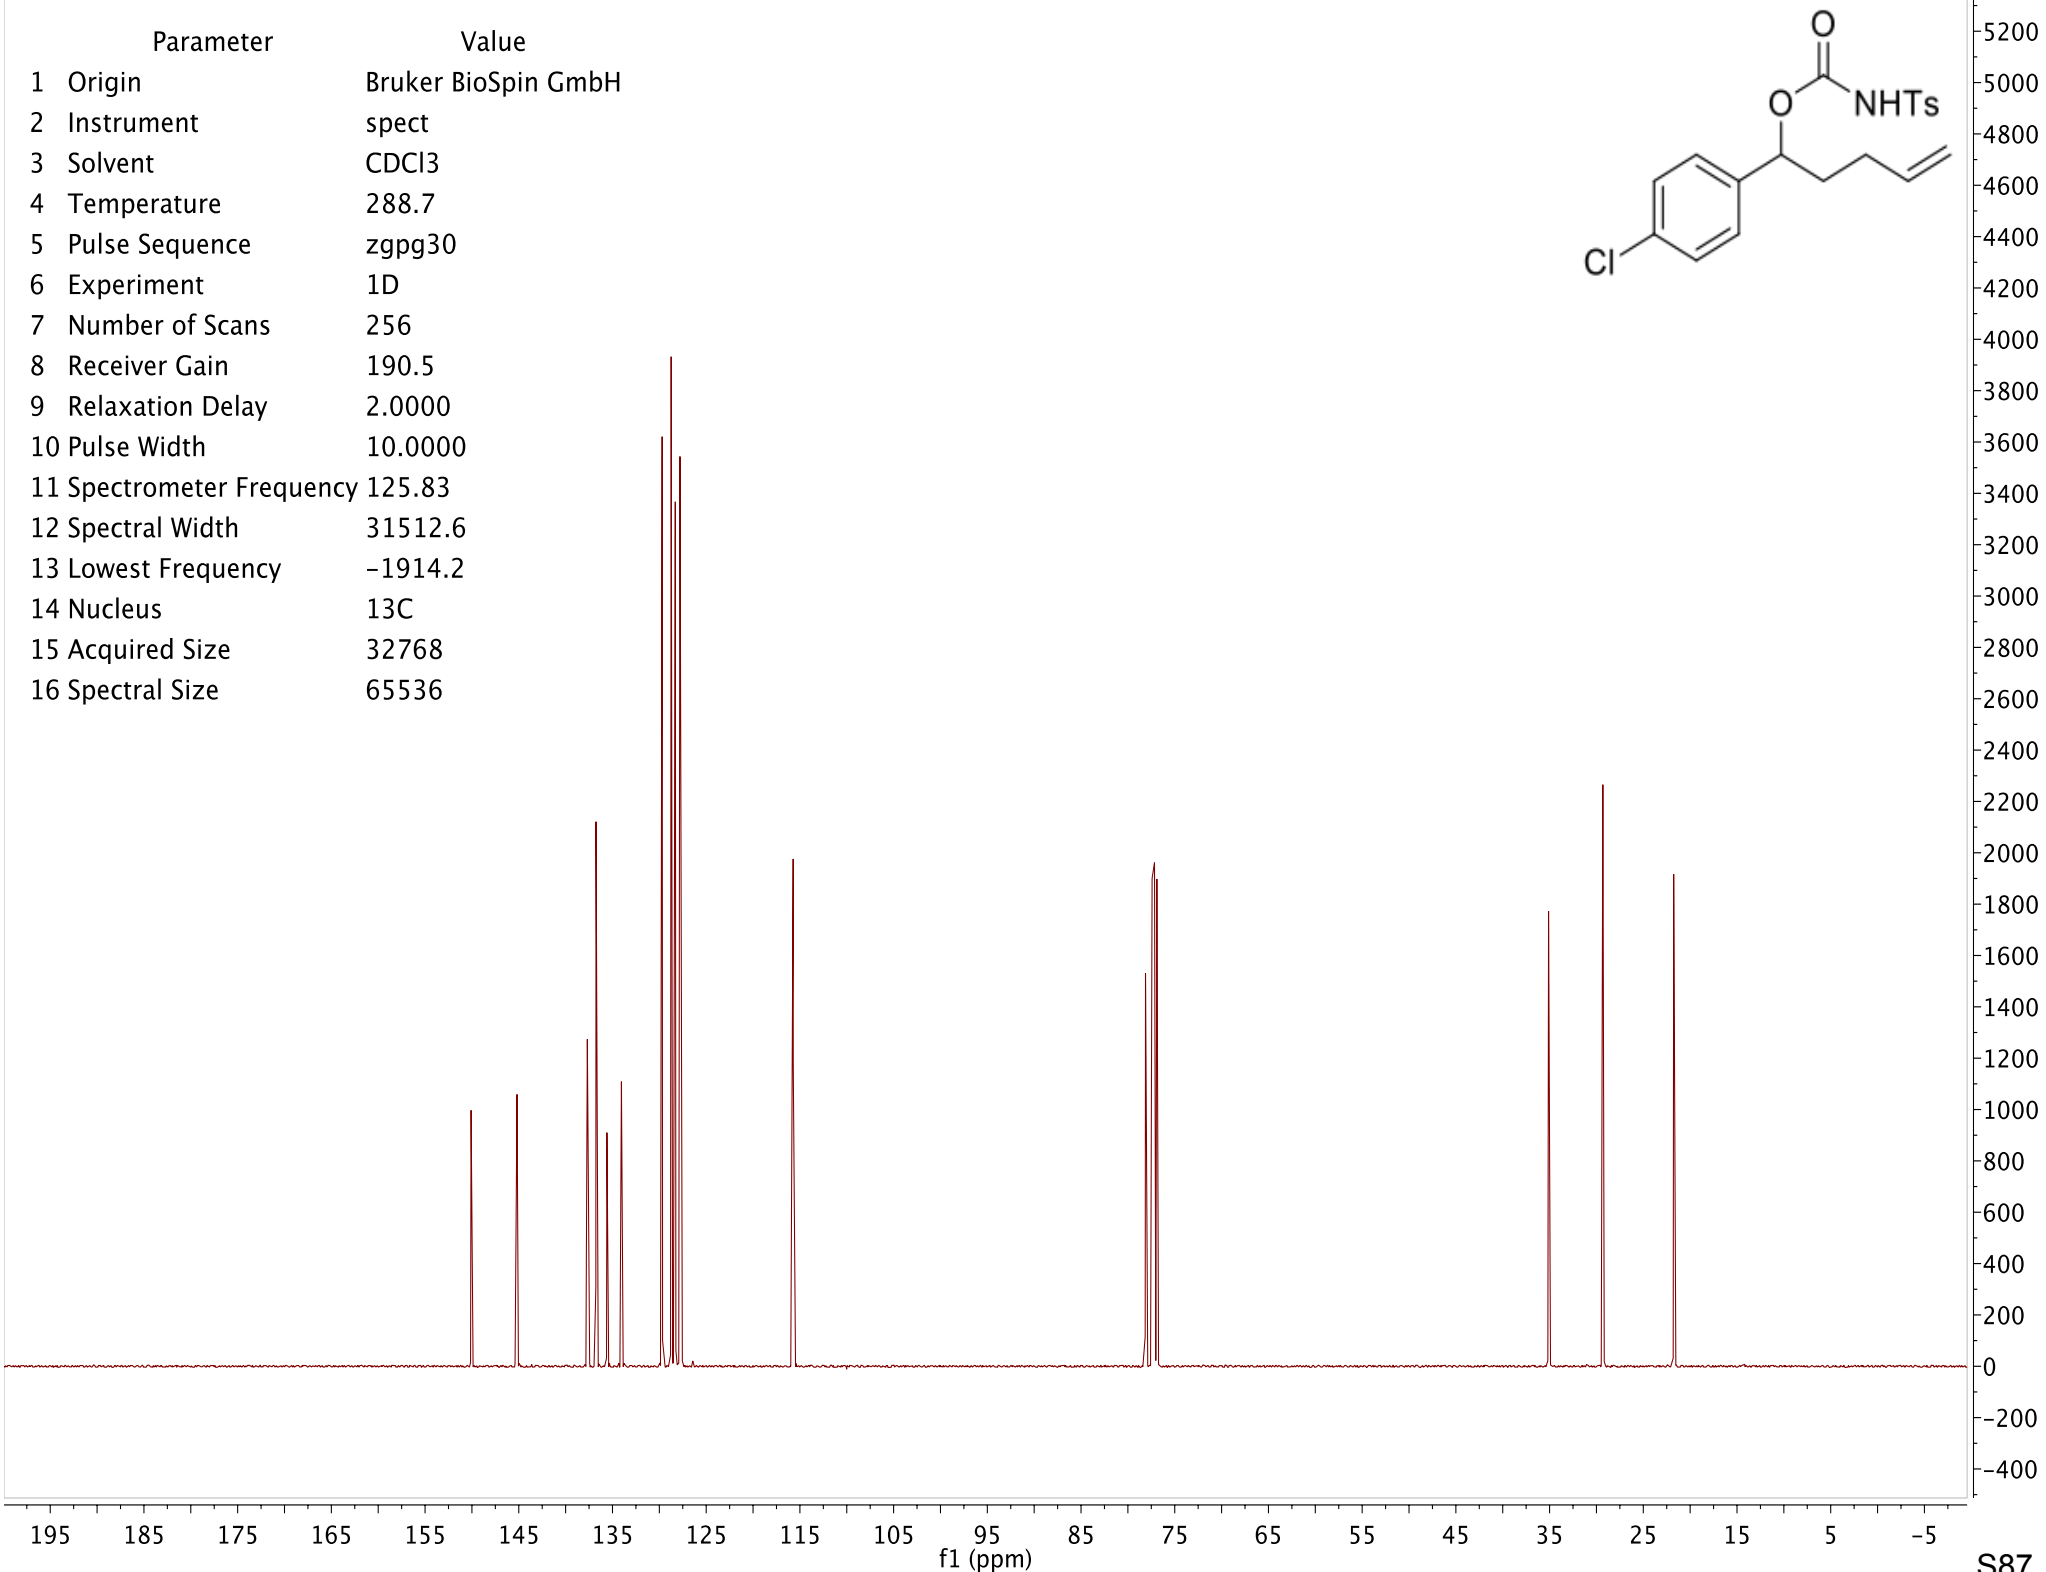

| Parameter                 | Value               |
|---------------------------|---------------------|
| 1 Origin                  | Bruker BioSpin GmbH |
| 2 Instrument              | spect               |
| 3 Solvent                 | CDCl3               |
| 4 Temperature             | 298.1               |
| 5 Pulse Sequence          | zg30                |
| 6 Experiment              | 1D                  |
| 7 Number of Scans         | 16                  |
| 8 Receiver Gain           | 17.0                |
| 9 Relaxation Delay        | 15.0000             |
| 10 Pulse Width            | 12.0000             |
| 11 Spectrometer Frequency | 500.35              |
| 12 Spectral Width         | 10000.0             |
| 13 Lowest Frequency       | -1921.8             |
| 14 Nucleus                | 1H                  |
| 15 Acquired Size          | 32768               |
| 16 Spectral Size          | 65536               |

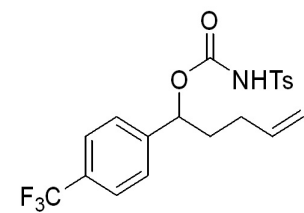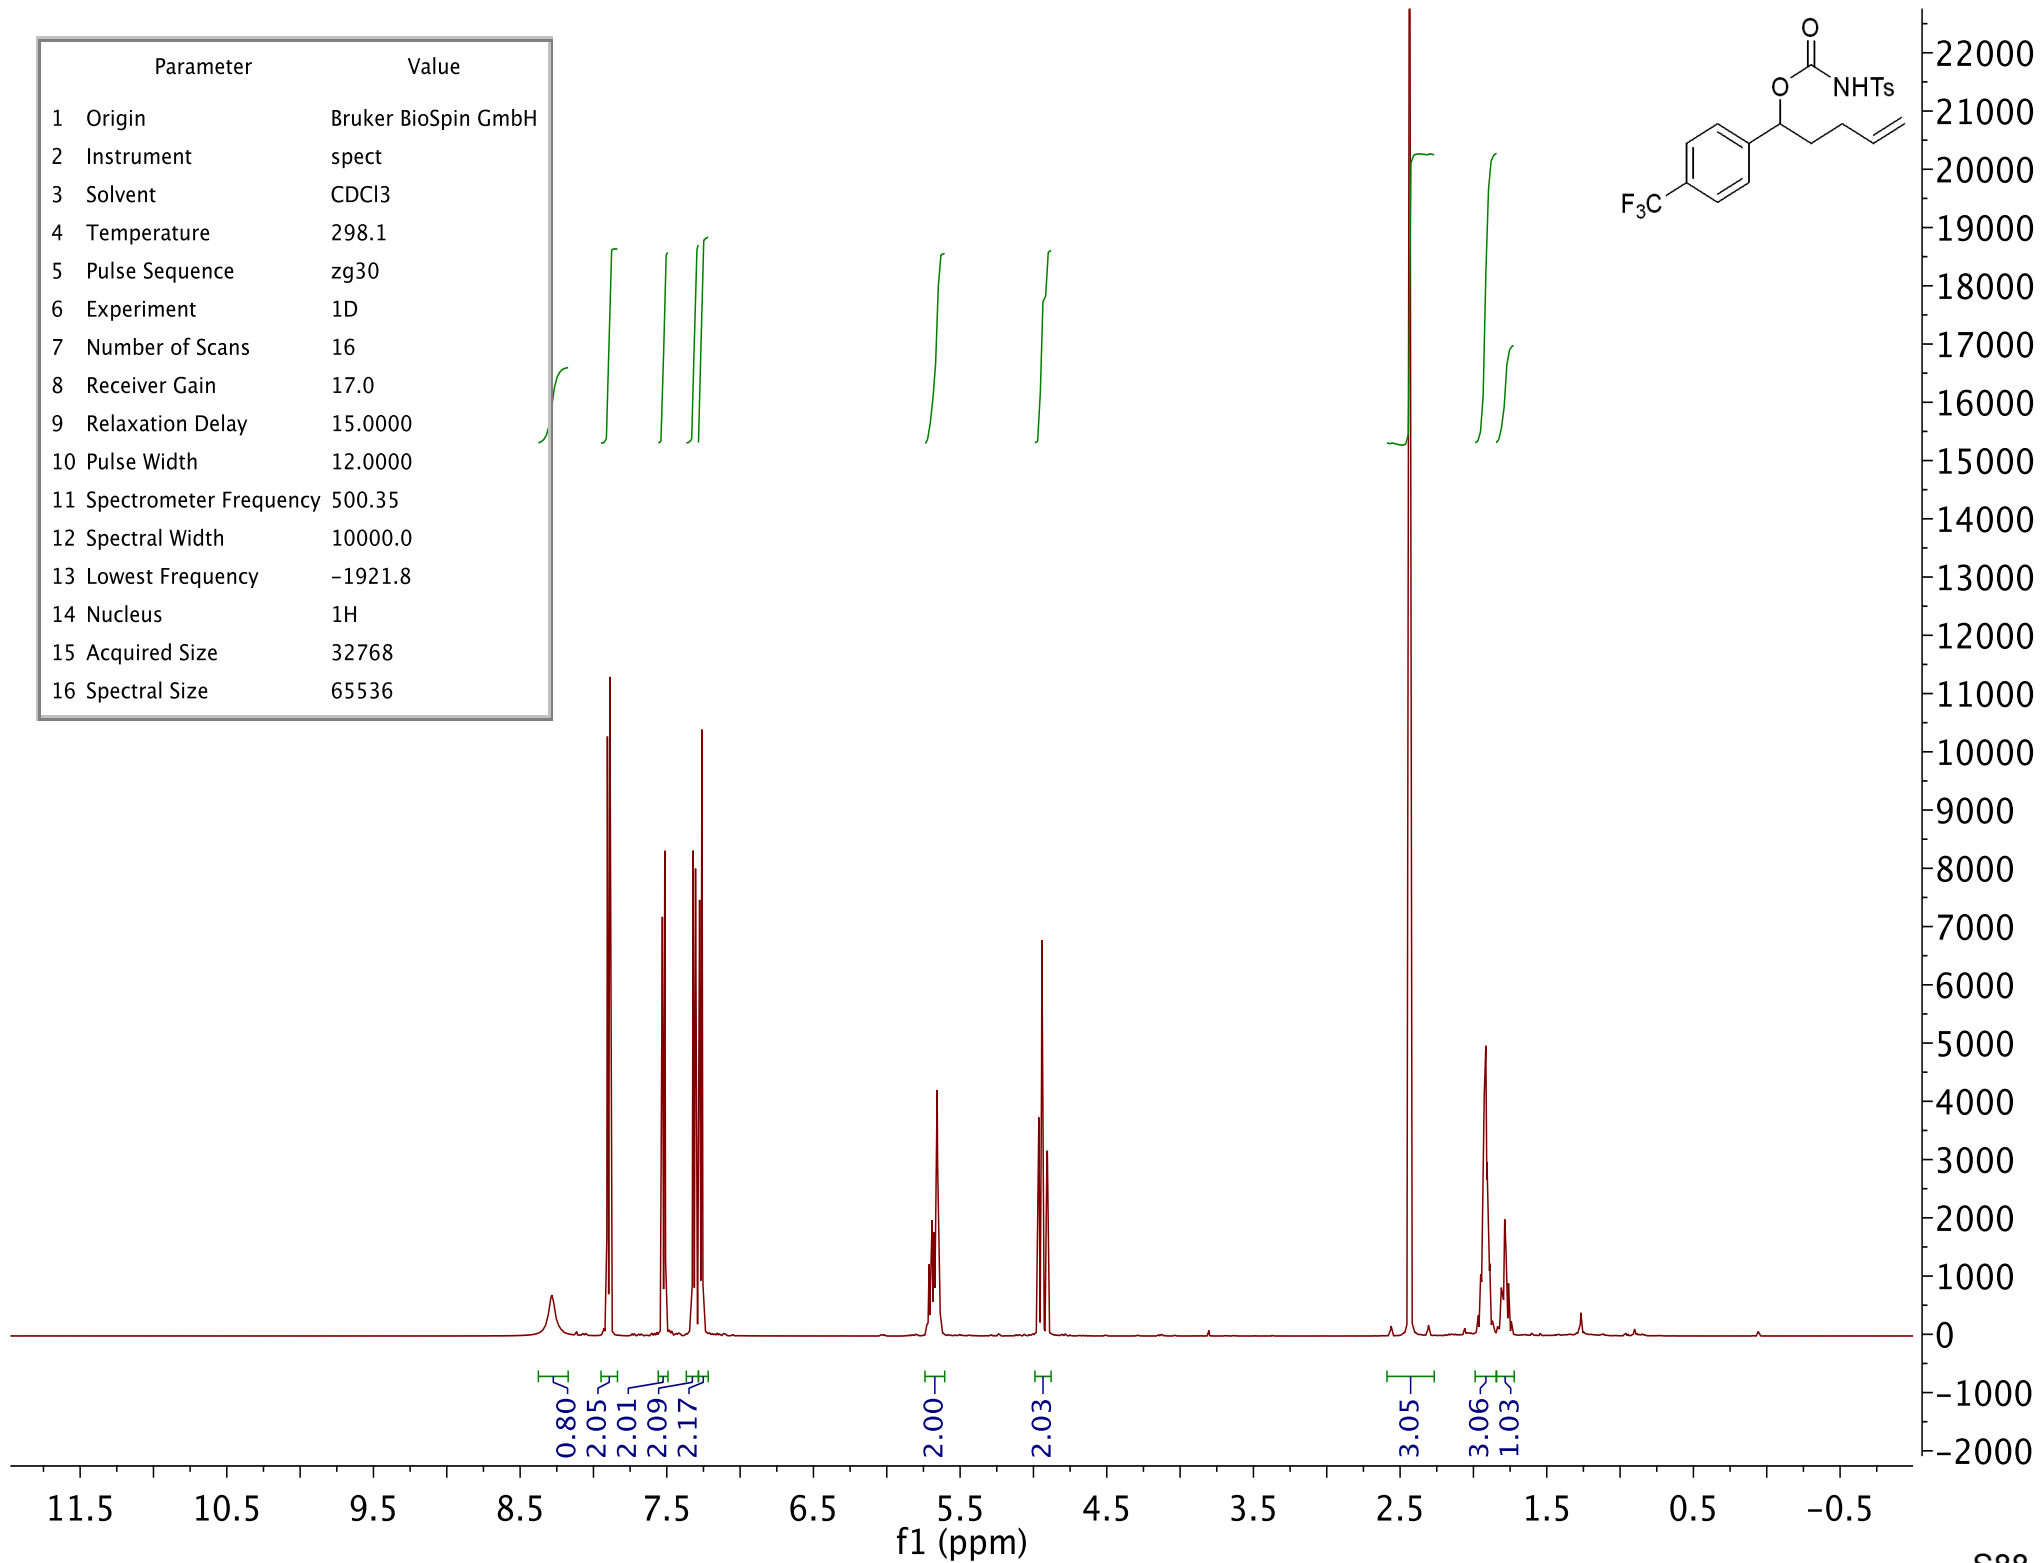

| Parameter                 | Value               |
|---------------------------|---------------------|
| 1 Origin                  | Bruker BioSpin GmbH |
| 2 Instrument              | spect               |
| 3 Solvent                 | CDCl3               |
| 4 Temperature             | 298.1               |
| 5 Pulse Sequence          | zgpg30              |
| 6 Experiment              | 1D                  |
| 7 Number of Scans         | 256                 |
| 8 Receiver Gain           | 190.5               |
| 9 Relaxation Delay        | 2.0000              |
| 10 Pulse Width            | 10.0000             |
| 11 Spectrometer Frequency | 125.83              |
| 12 Spectral Width         | 31512.6             |
| 13 Lowest Frequency       | -1905.9             |
| 14 Nucleus                | <sup>13</sup> C     |
| 15 Acquired Size          | 32768               |
| 16 Spectral Size          | 65536               |

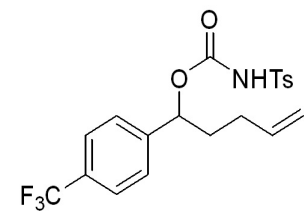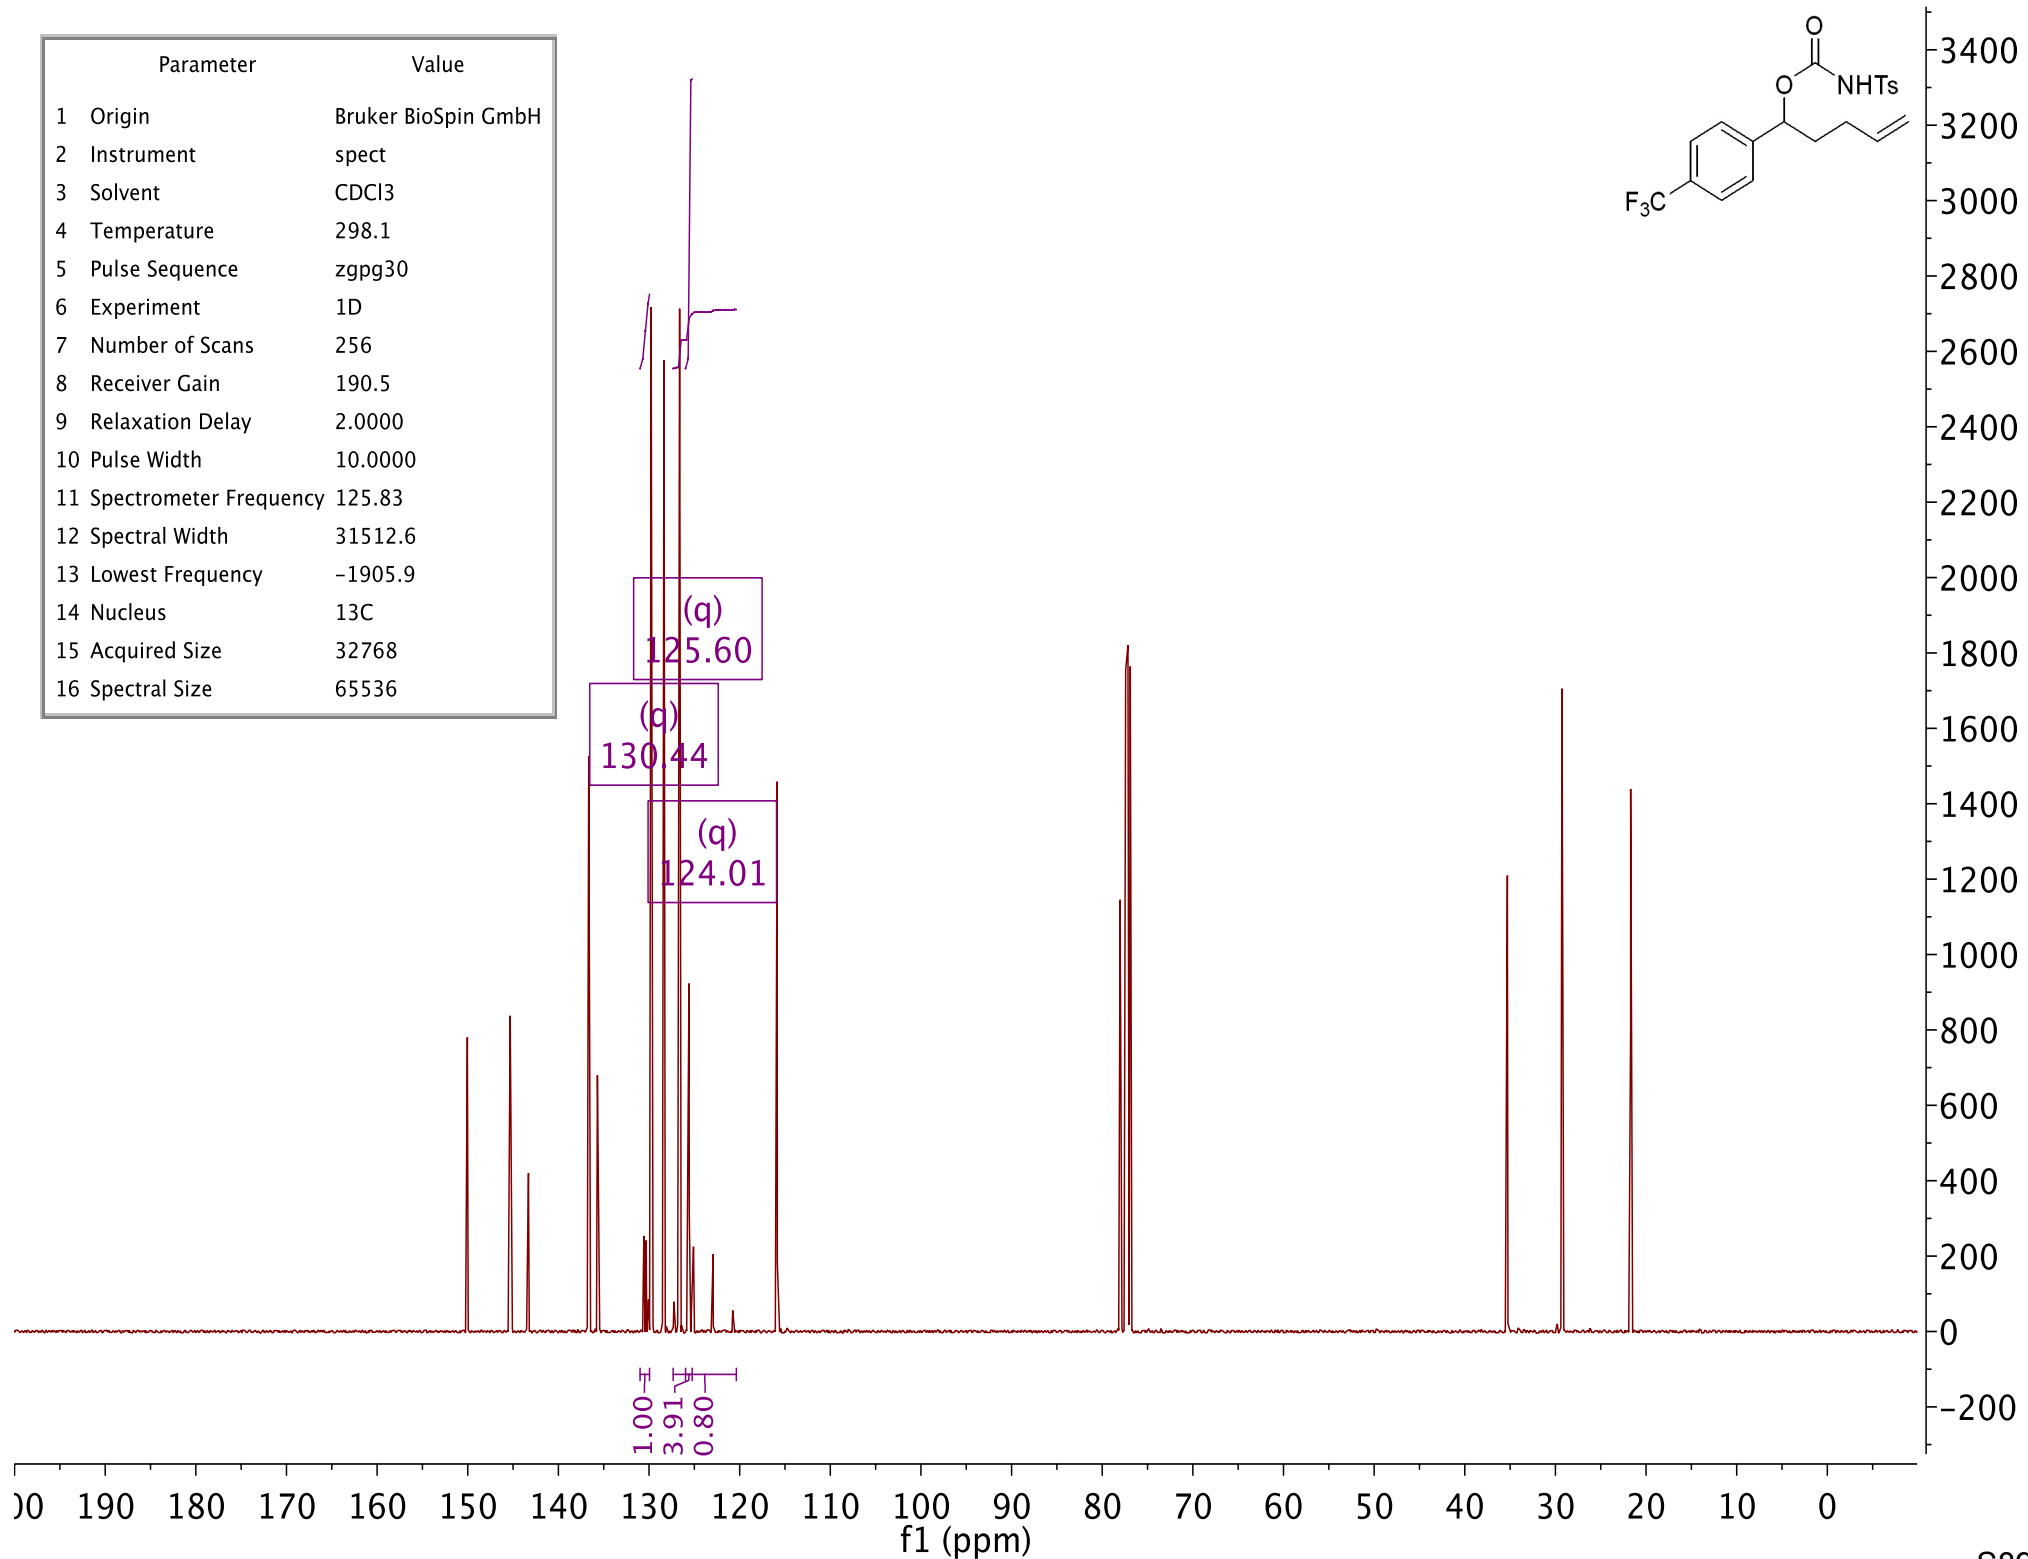

160-100ppm

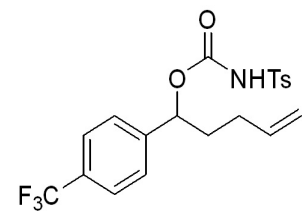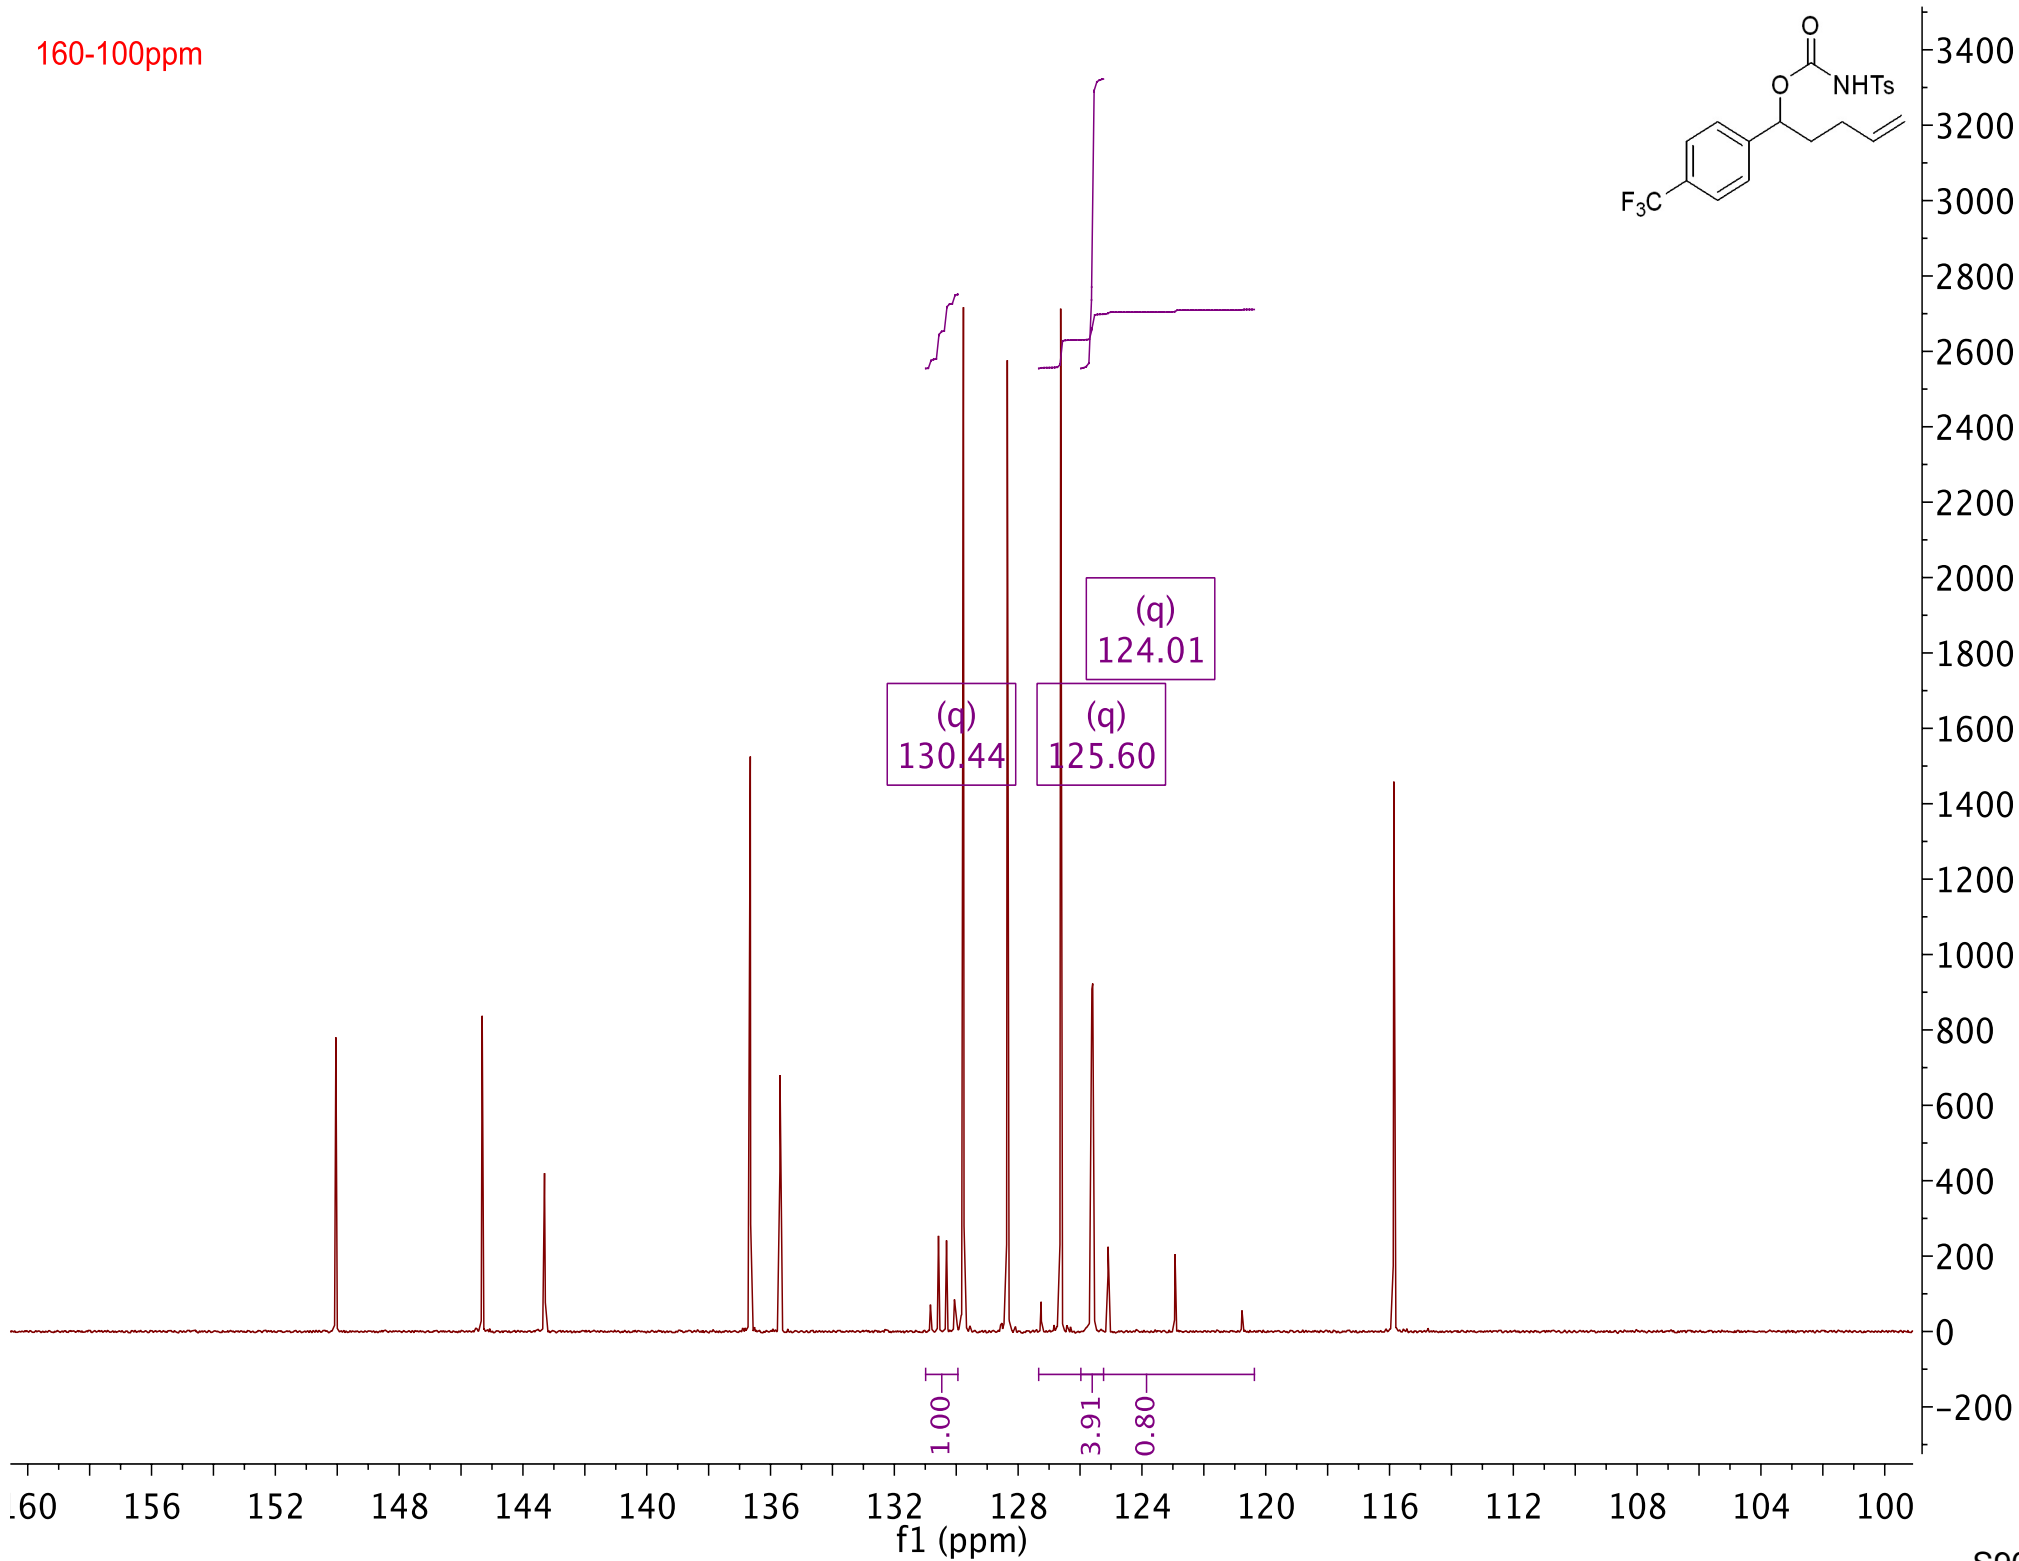

| Parameter                 | Value               |
|---------------------------|---------------------|
| 1 Origin                  | Bruker BioSpin GmbH |
| 2 Instrument              | spect               |
| 3 Solvent                 | CDCl3               |
| 4 Temperature             | 298.1               |
| 5 Pulse Sequence          | zgfgq               |
| 6 Experiment              | 1D                  |
| 7 Number of Scans         | 16                  |
| 8 Receiver Gain           | 190.5               |
| 9 Relaxation Delay        | 5.0000              |
| 10 Pulse Width            | 15.0000             |
| 11 Spectrometer Frequency | 470.75              |
| 12 Spectral Width         | 113636.4            |
| 13 Lowest Frequency       | -103898.1           |
| 14 Nucleus                | 19F                 |
| 15 Acquired Size          | 65536               |
| 16 Spectral Size          | 131072              |

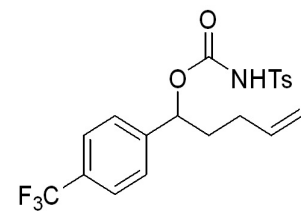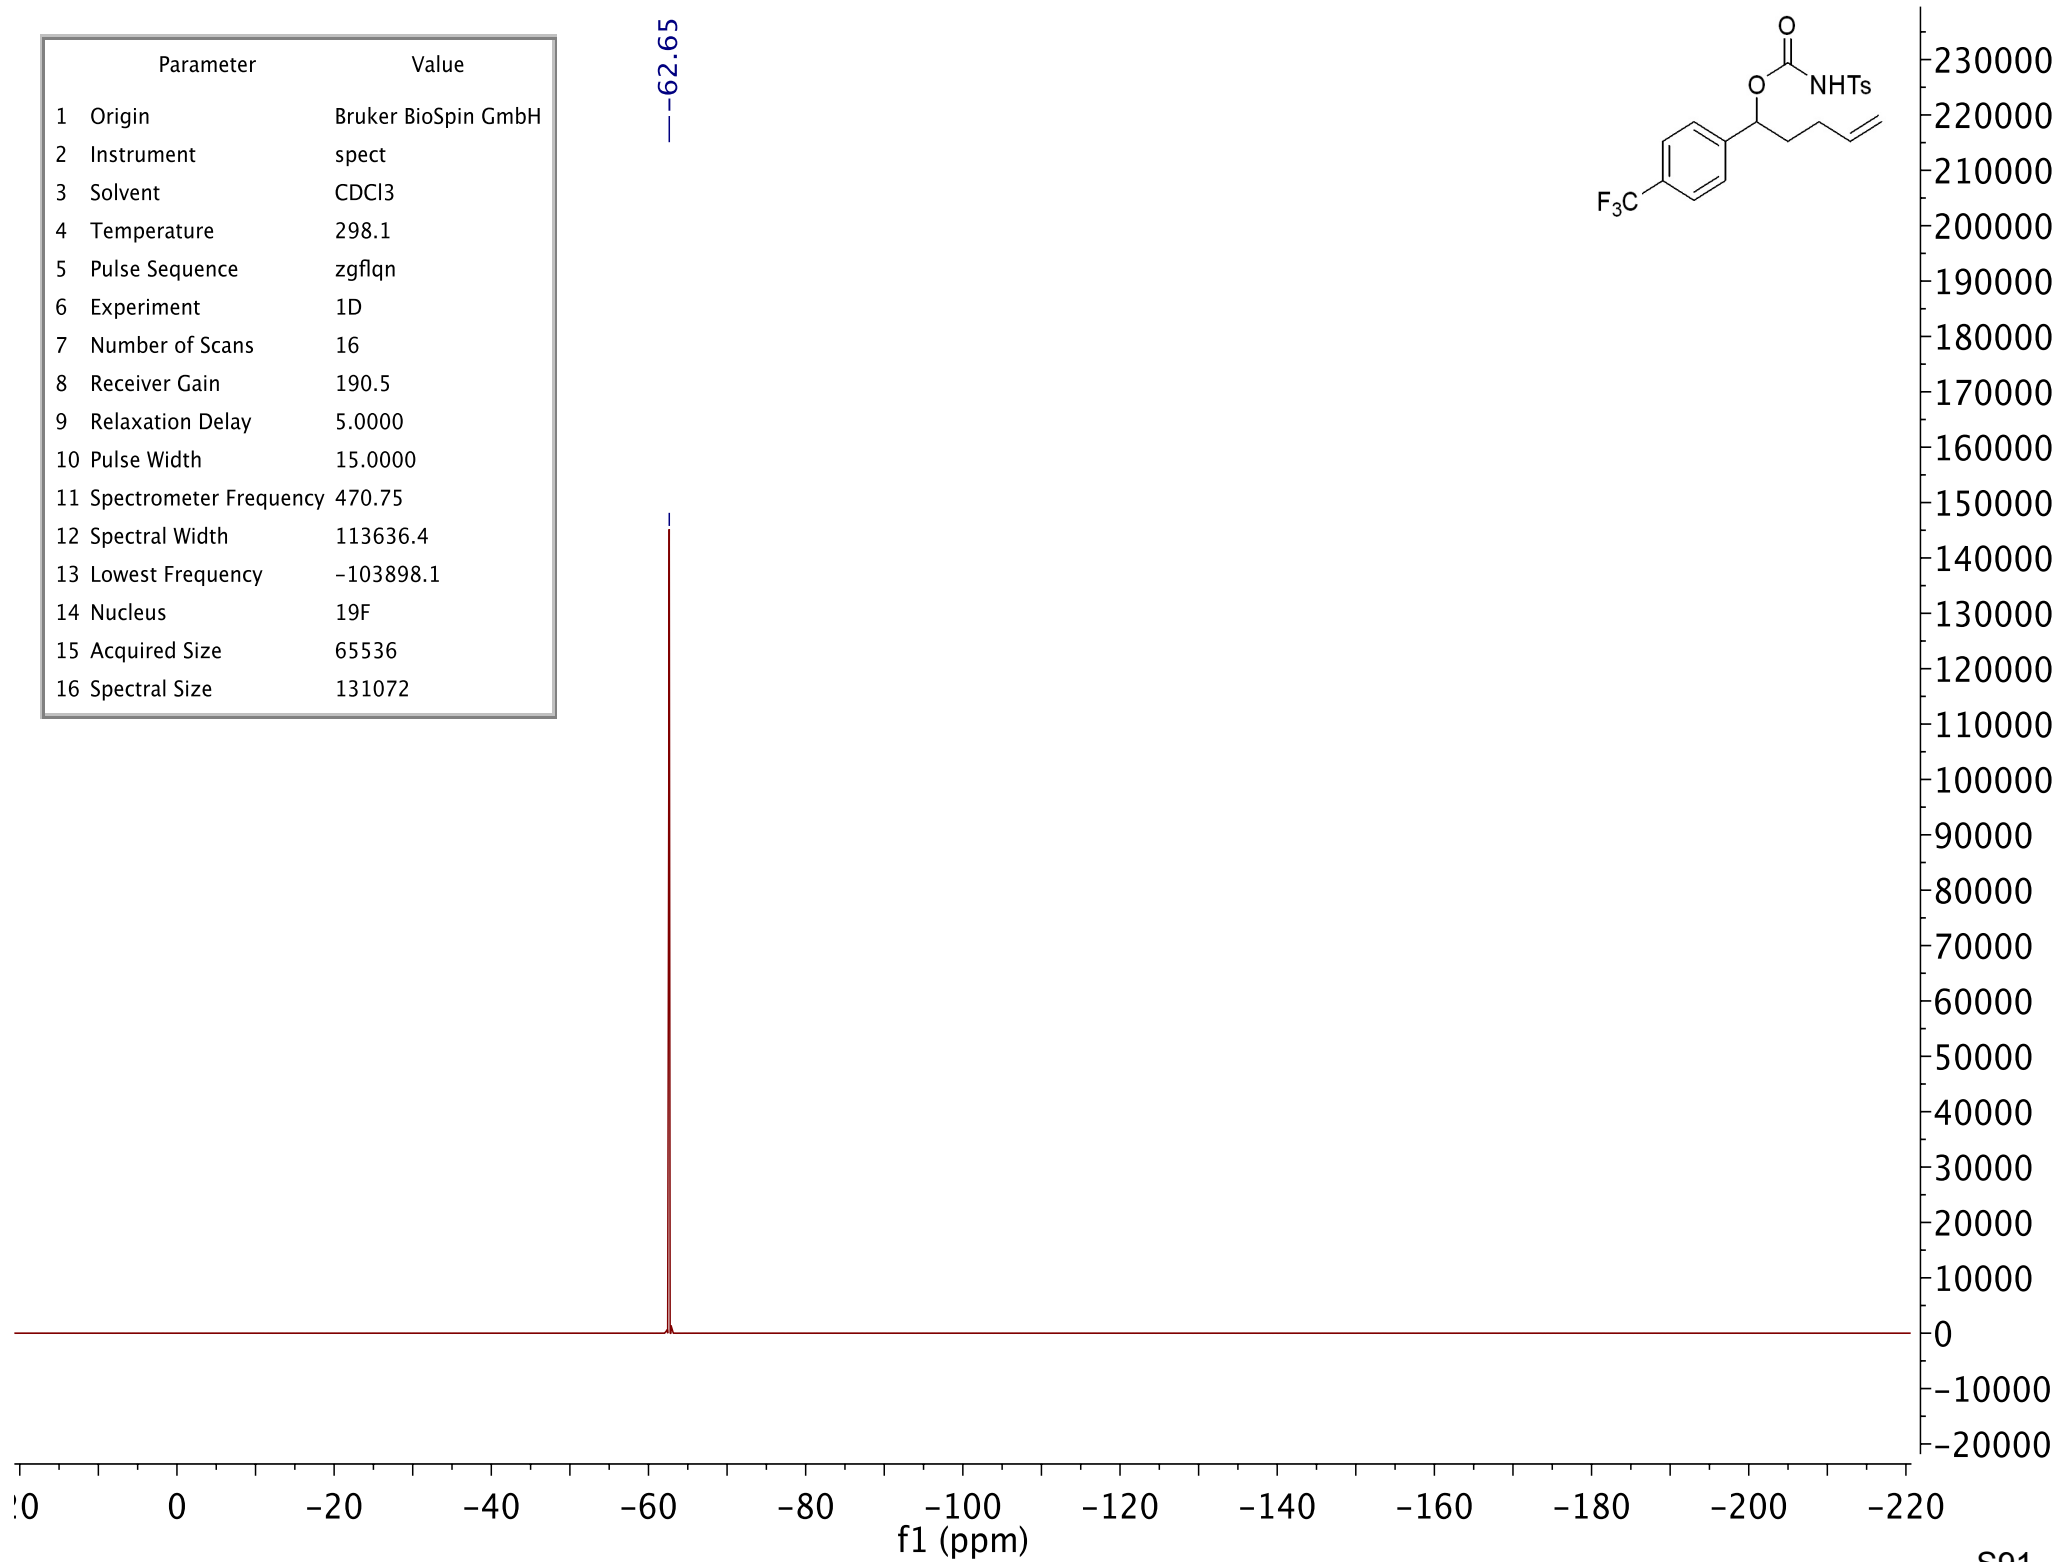

| Parameter                 | Value               |
|---------------------------|---------------------|
| 1 Origin                  | Bruker BioSpin GmbH |
| 2 Instrument              | spect               |
| 3 Solvent                 | CDCl3               |
| 4 Temperature             | 298.1               |
| 5 Pulse Sequence          | zg30                |
| 6 Experiment              | 1D                  |
| 7 Number of Scans         | 5                   |
| 8 Receiver Gain           | 76.2                |
| 9 Relaxation Delay        | 15.0000             |
| 10 Pulse Width            | 12.0000             |
| 11 Spectrometer Frequency | 500.35              |
| 12 Spectral Width         | 10000.0             |
| 13 Lowest Frequency       | -1922.3             |
| 14 Nucleus                | 1H                  |
| 15 Acquired Size          | 32768               |
| 16 Spectral Size          | 65536               |

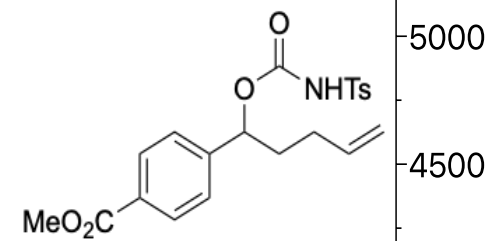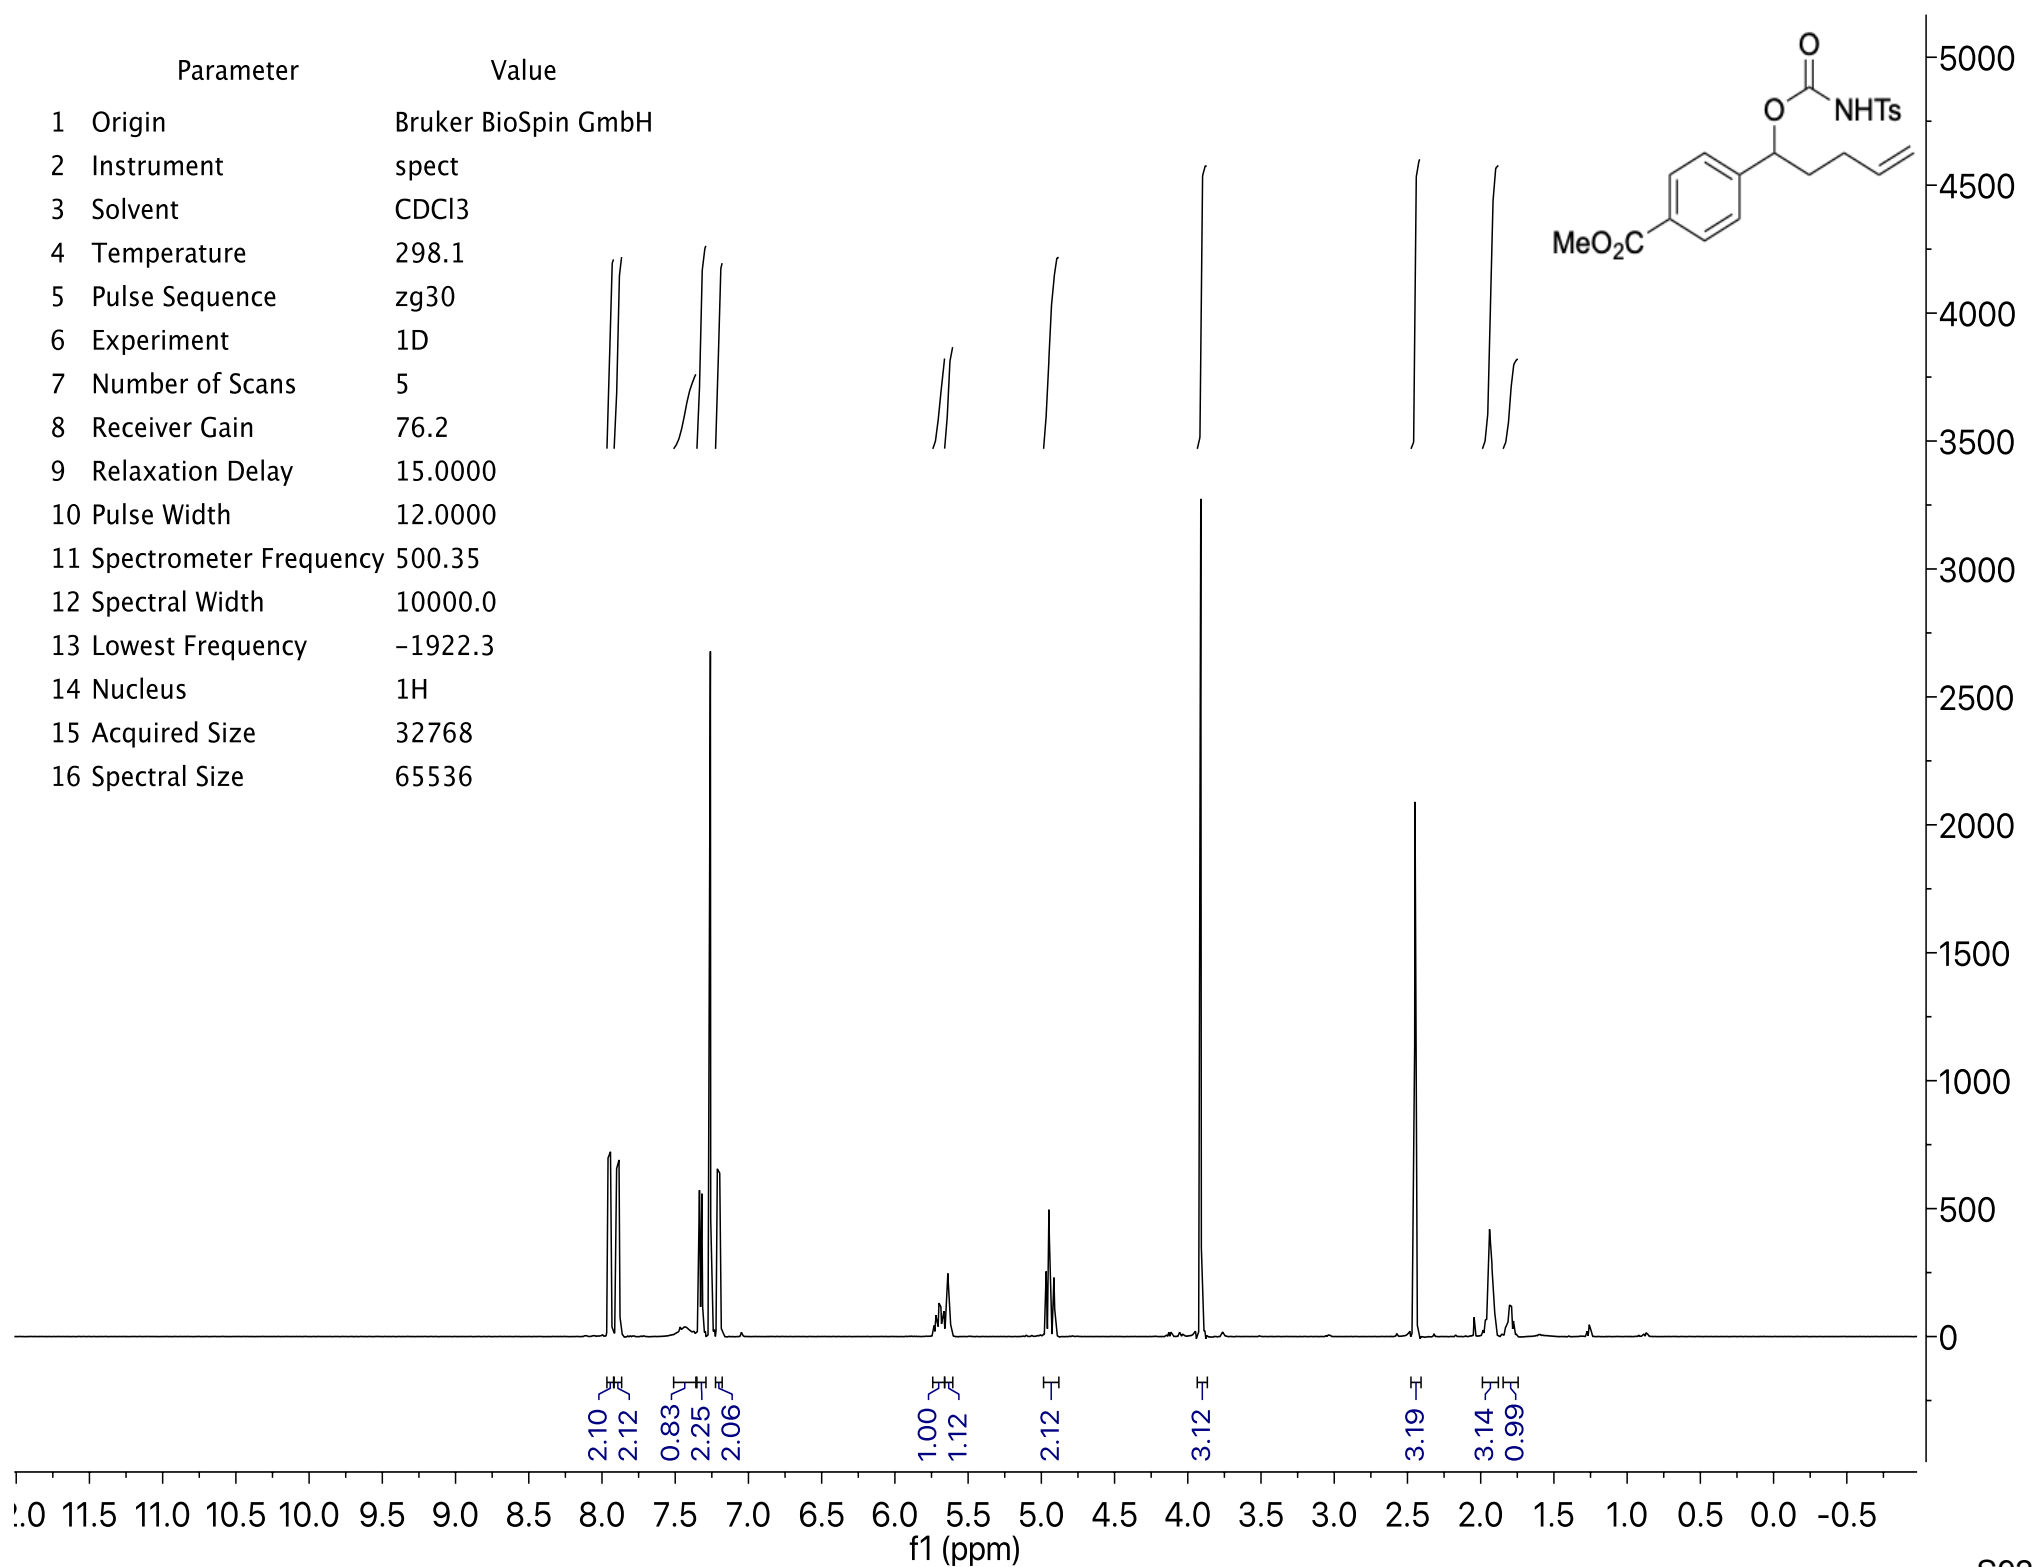

| Parameter                 | Value               |
|---------------------------|---------------------|
| 1 Origin                  | Bruker BioSpin GmbH |
| 2 Instrument              | spect               |
| 3 Solvent                 | CDCl3               |
| 4 Temperature             | 298.2               |
| 5 Pulse Sequence          | zgpg30              |
| 6 Experiment              | 1D                  |
| 7 Number of Scans         | 512                 |
| 8 Receiver Gain           | 190.5               |
| 9 Relaxation Delay        | 1.0000              |
| 10 Pulse Width            | 10.0000             |
| 11 Spectrometer Frequency | 125.83              |
| 12 Spectral Width         | 31512.6             |
| 13 Lowest Frequency       | -1898.1             |
| 14 Nucleus                | 13C                 |
| 15 Acquired Size          | 32768               |
| 16 Spectral Size          | 65536               |

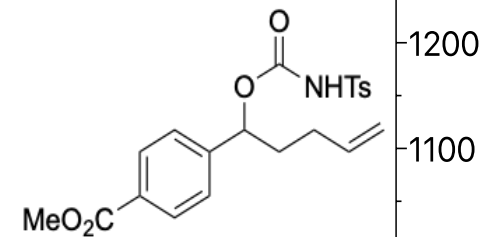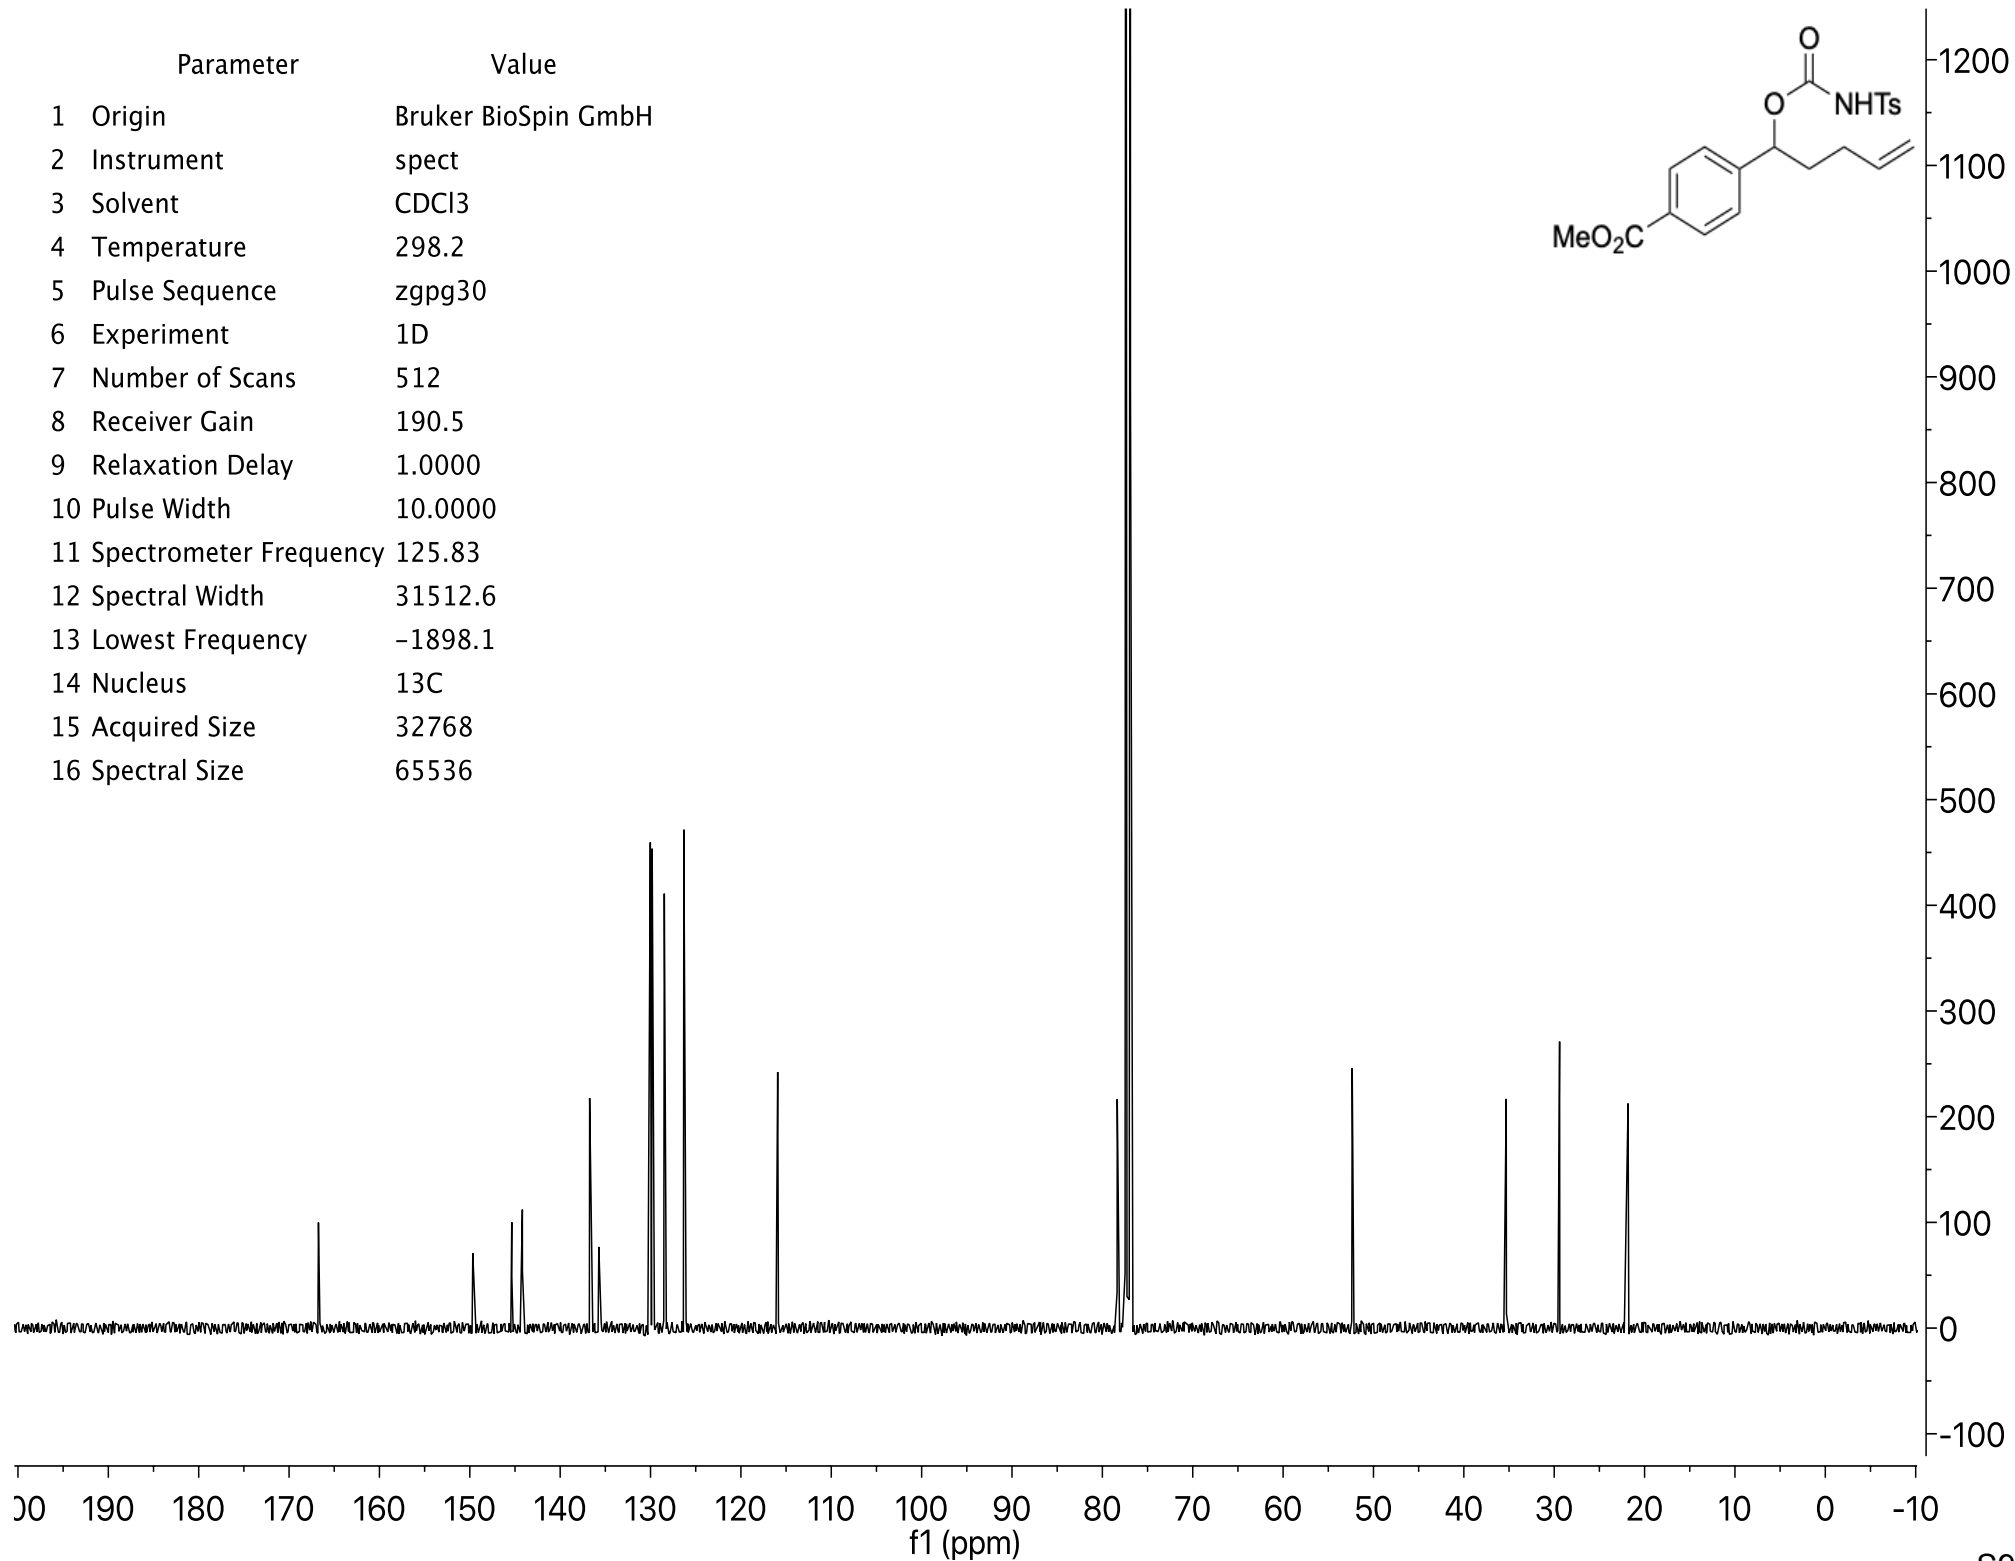

180-100ppm

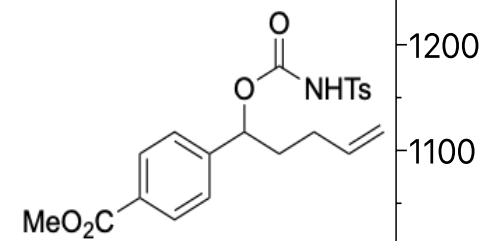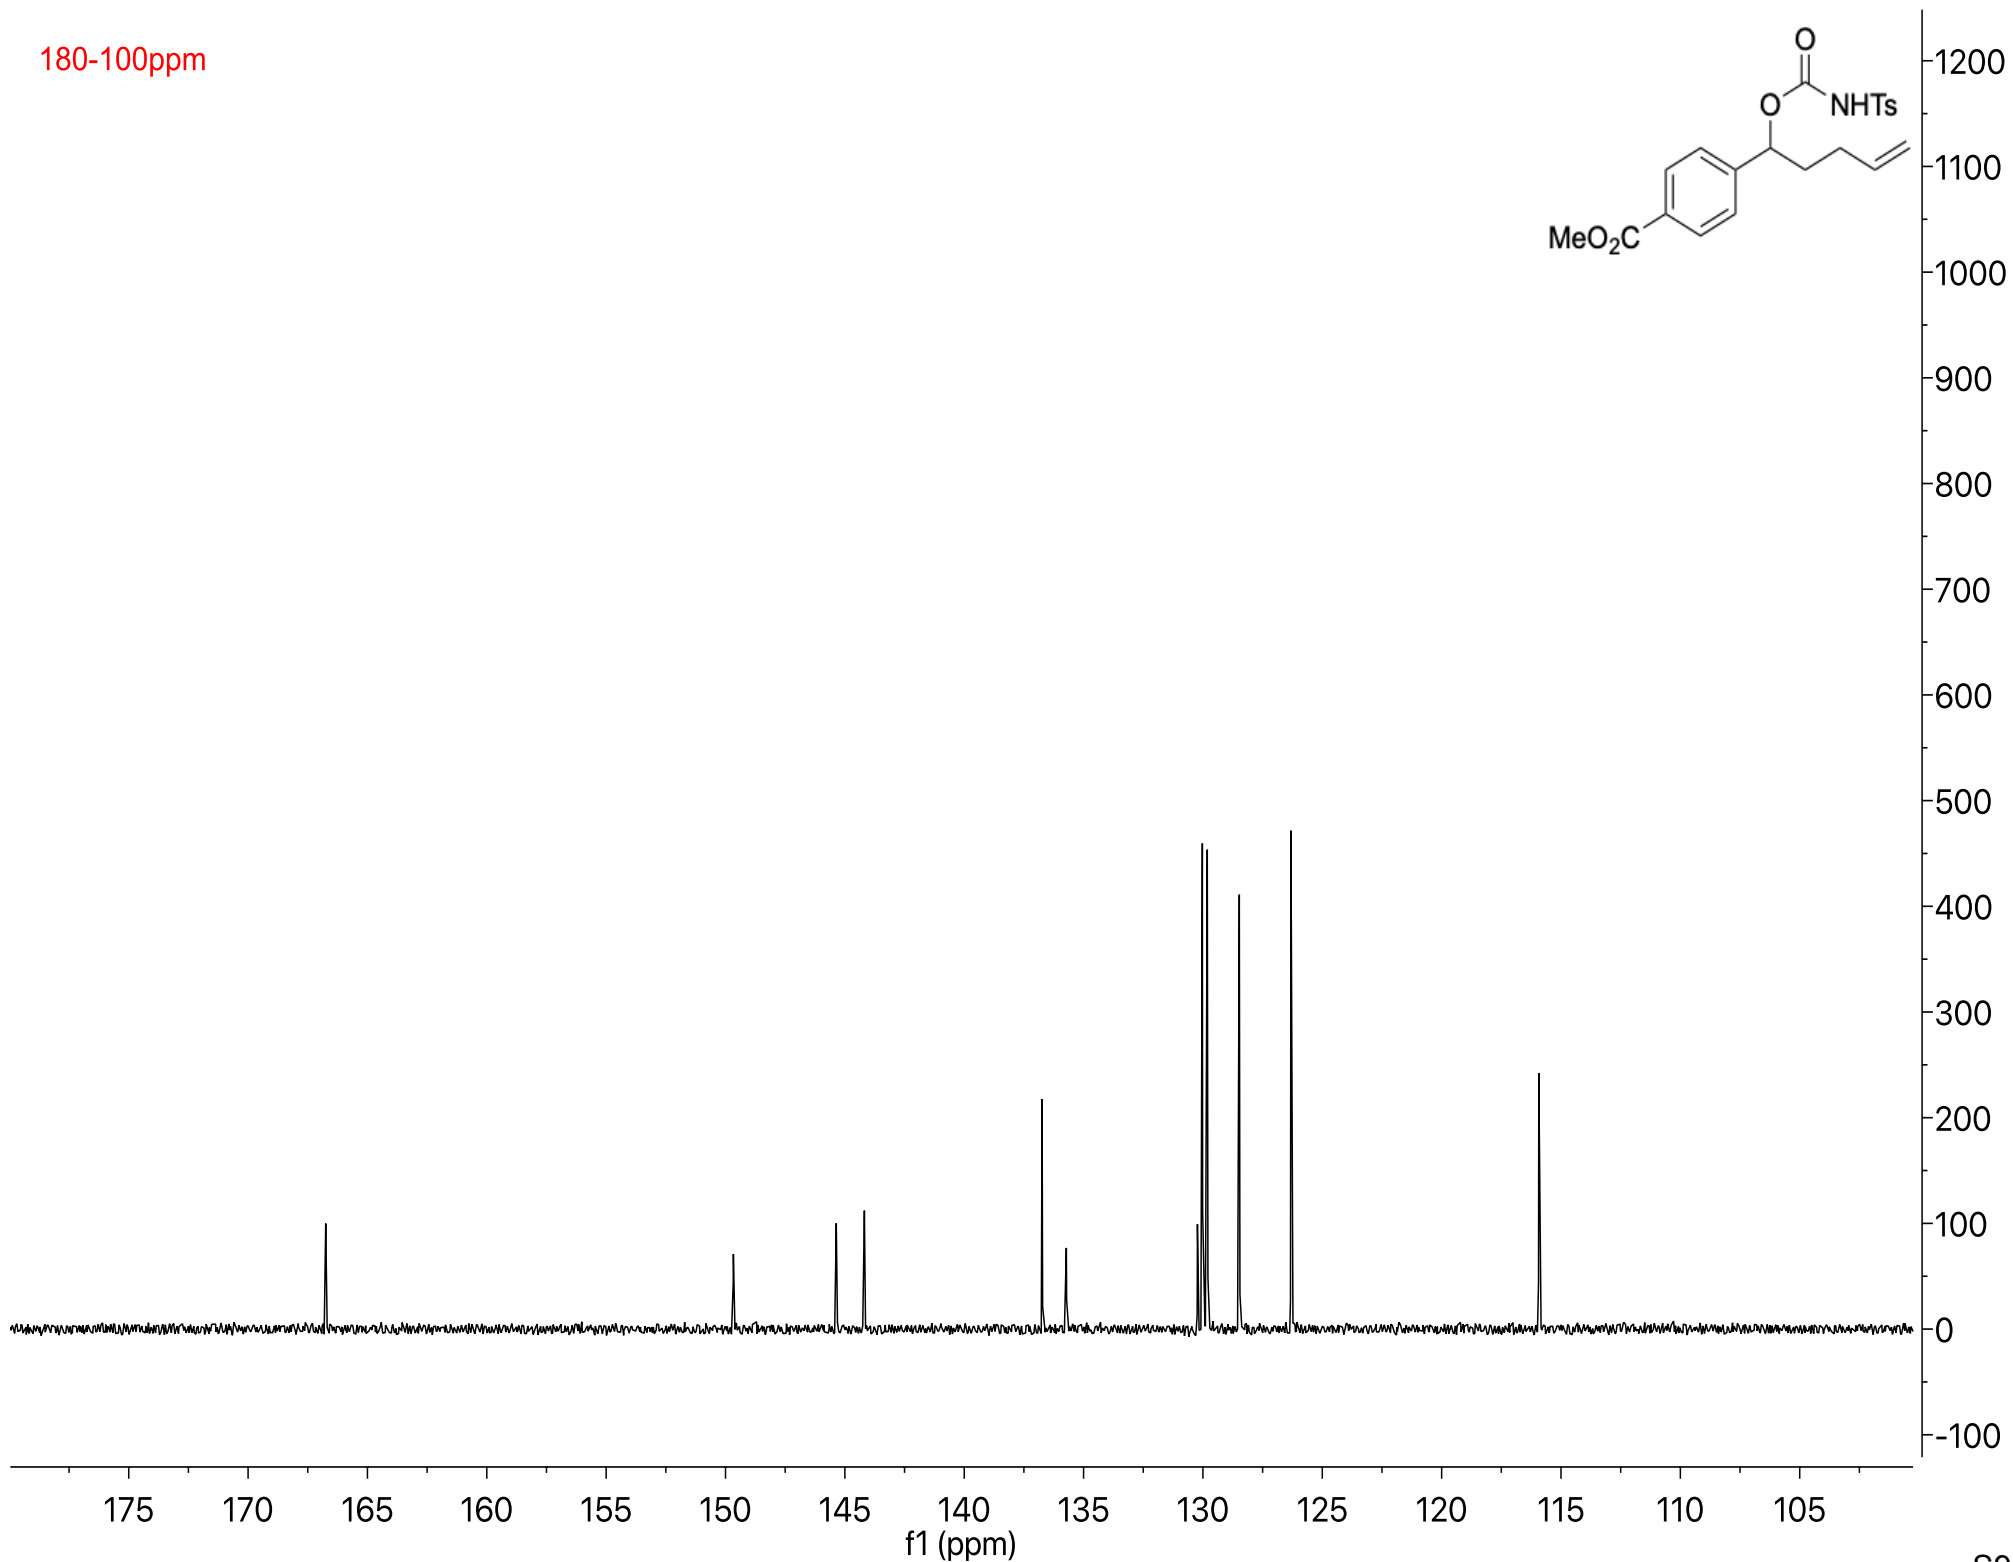



| Parameter                 | Value               |
|---------------------------|---------------------|
| 1 Origin                  | Bruker BioSpin GmbH |
| 2 Instrument              | spect               |
| 3 Solvent                 | CDCl3               |
| 4 Temperature             | 298.1               |
| 5 Pulse Sequence          | zg30                |
| 6 Experiment              | 1D                  |
| 7 Number of Scans         | 5                   |
| 8 Receiver Gain           | 76.2                |
| 9 Relaxation Delay        | 15.0000             |
| 10 Pulse Width            | 12.0000             |
| 11 Spectrometer Frequency | 500.35              |
| 12 Spectral Width         | 10000.0             |
| 13 Lowest Frequency       | -1922.3             |
| 14 Nucleus                | 1H                  |
| 15 Acquired Size          | 32768               |
| 16 Spectral Size          | 65536               |

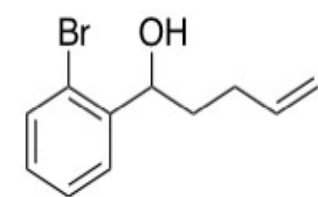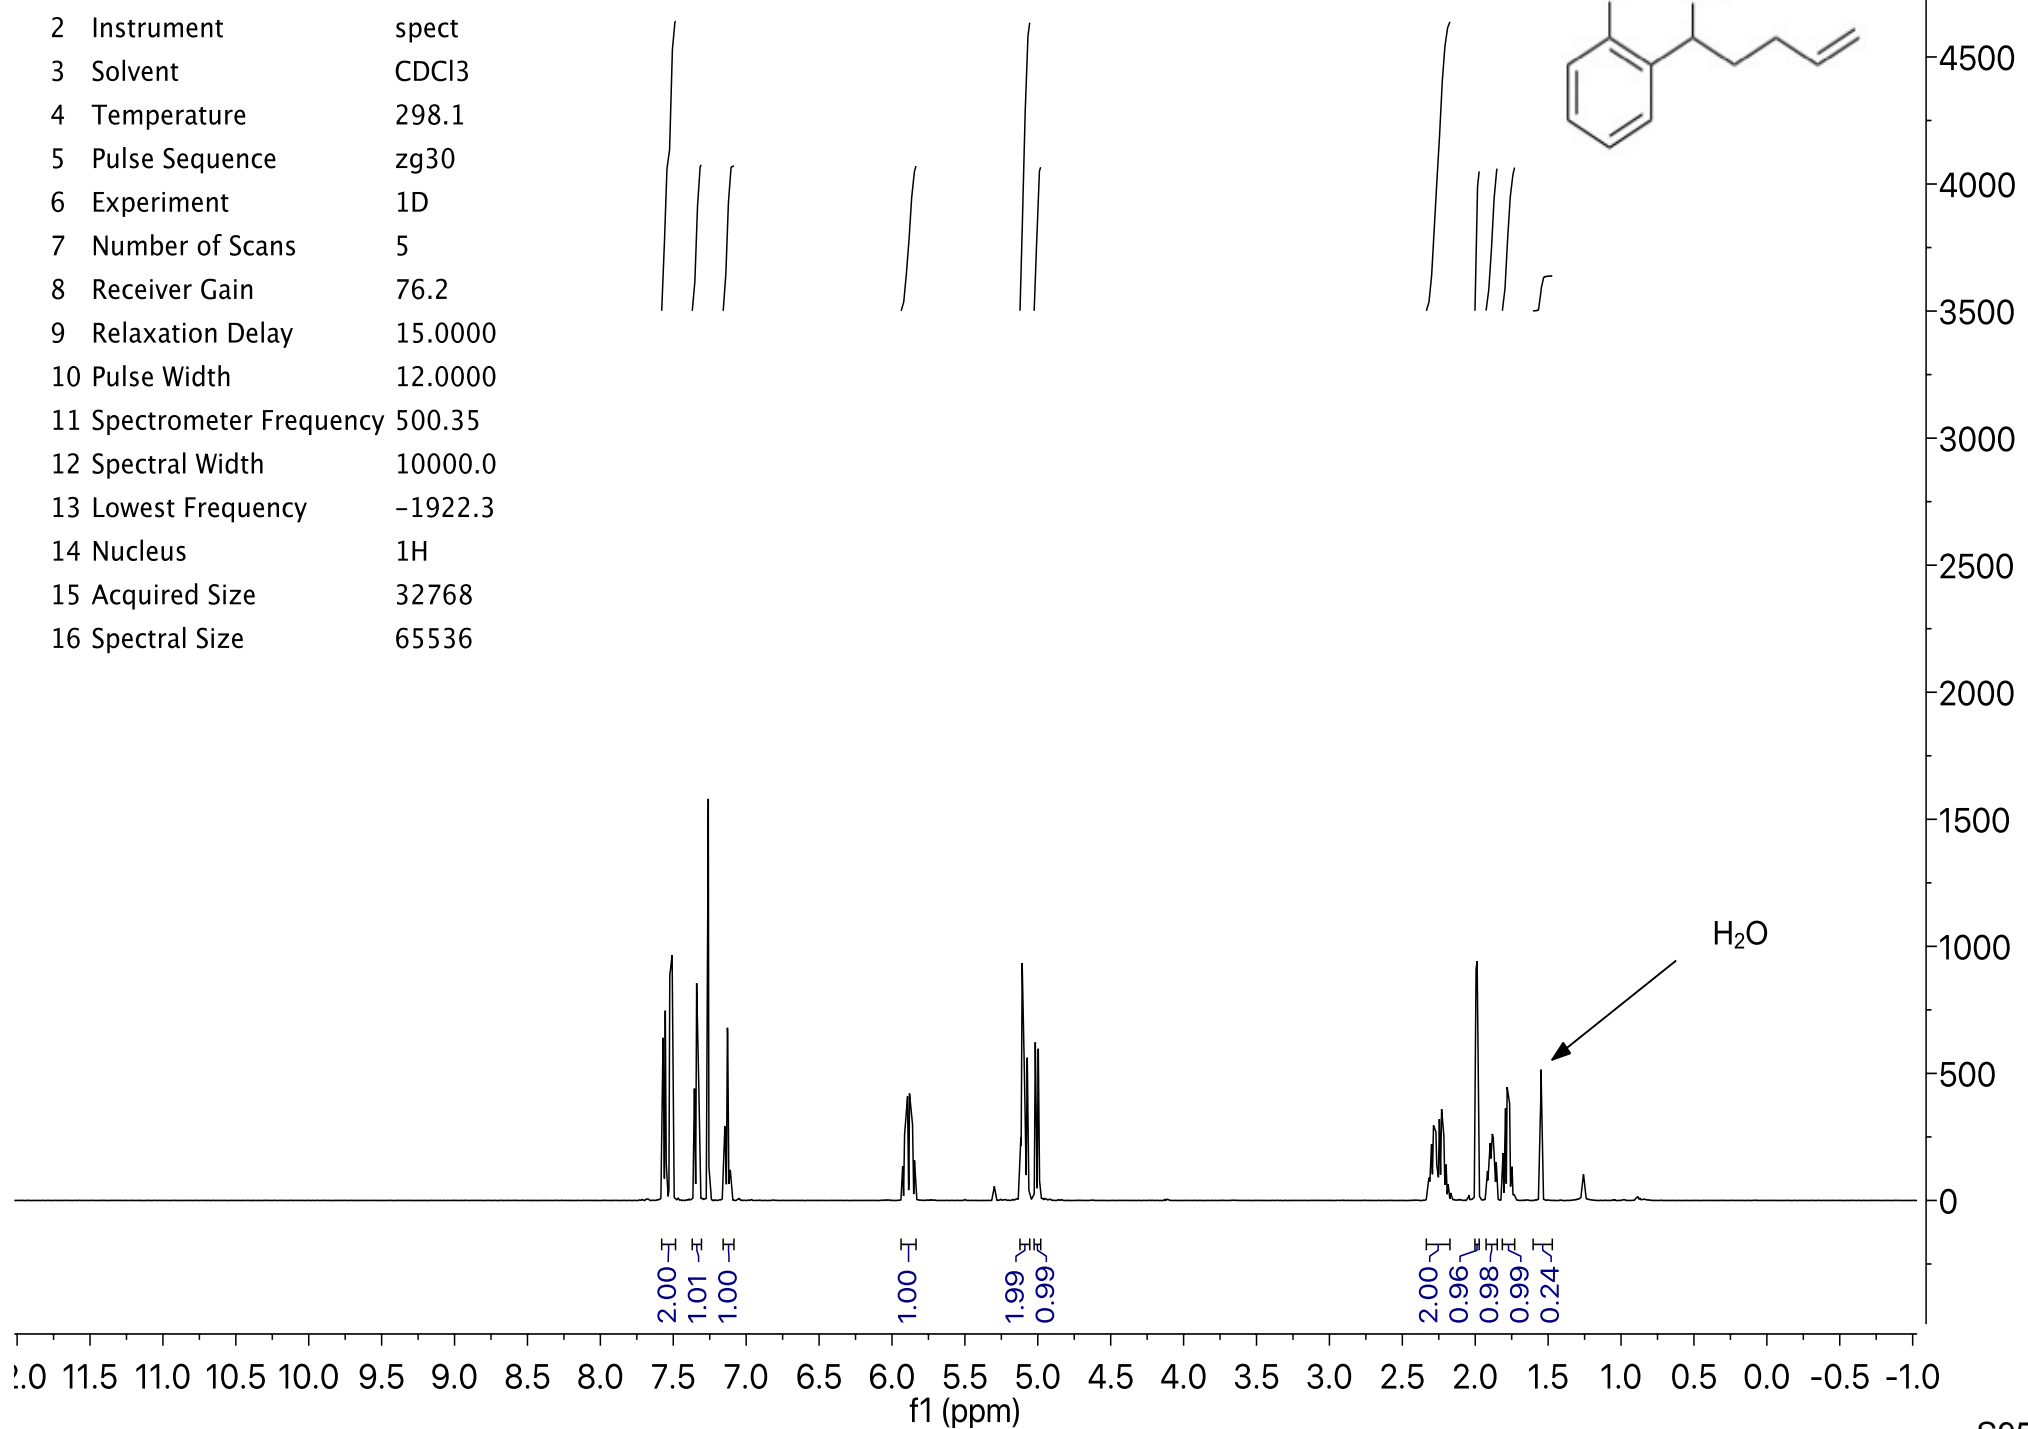

| Parameter                 | Value               |
|---------------------------|---------------------|
| 1 Origin                  | Bruker BioSpin GmbH |
| 2 Instrument              | spect               |
| 3 Solvent                 | CDCl3               |
| 4 Temperature             | 298.1               |
| 5 Pulse Sequence          | zgpg30              |
| 6 Experiment              | 1D                  |
| 7 Number of Scans         | 512                 |
| 8 Receiver Gain           | 190.5               |
| 9 Relaxation Delay        | 1.0000              |
| 10 Pulse Width            | 10.0000             |
| 11 Spectrometer Frequency | 125.83              |
| 12 Spectral Width         | 31512.6             |
| 13 Lowest Frequency       | -1898.1             |
| 14 Nucleus                | 13C                 |
| 15 Acquired Size          | 32768               |
| 16 Spectral Size          | 65536               |

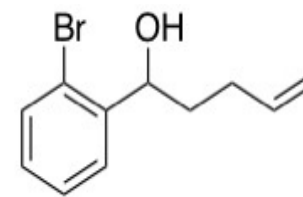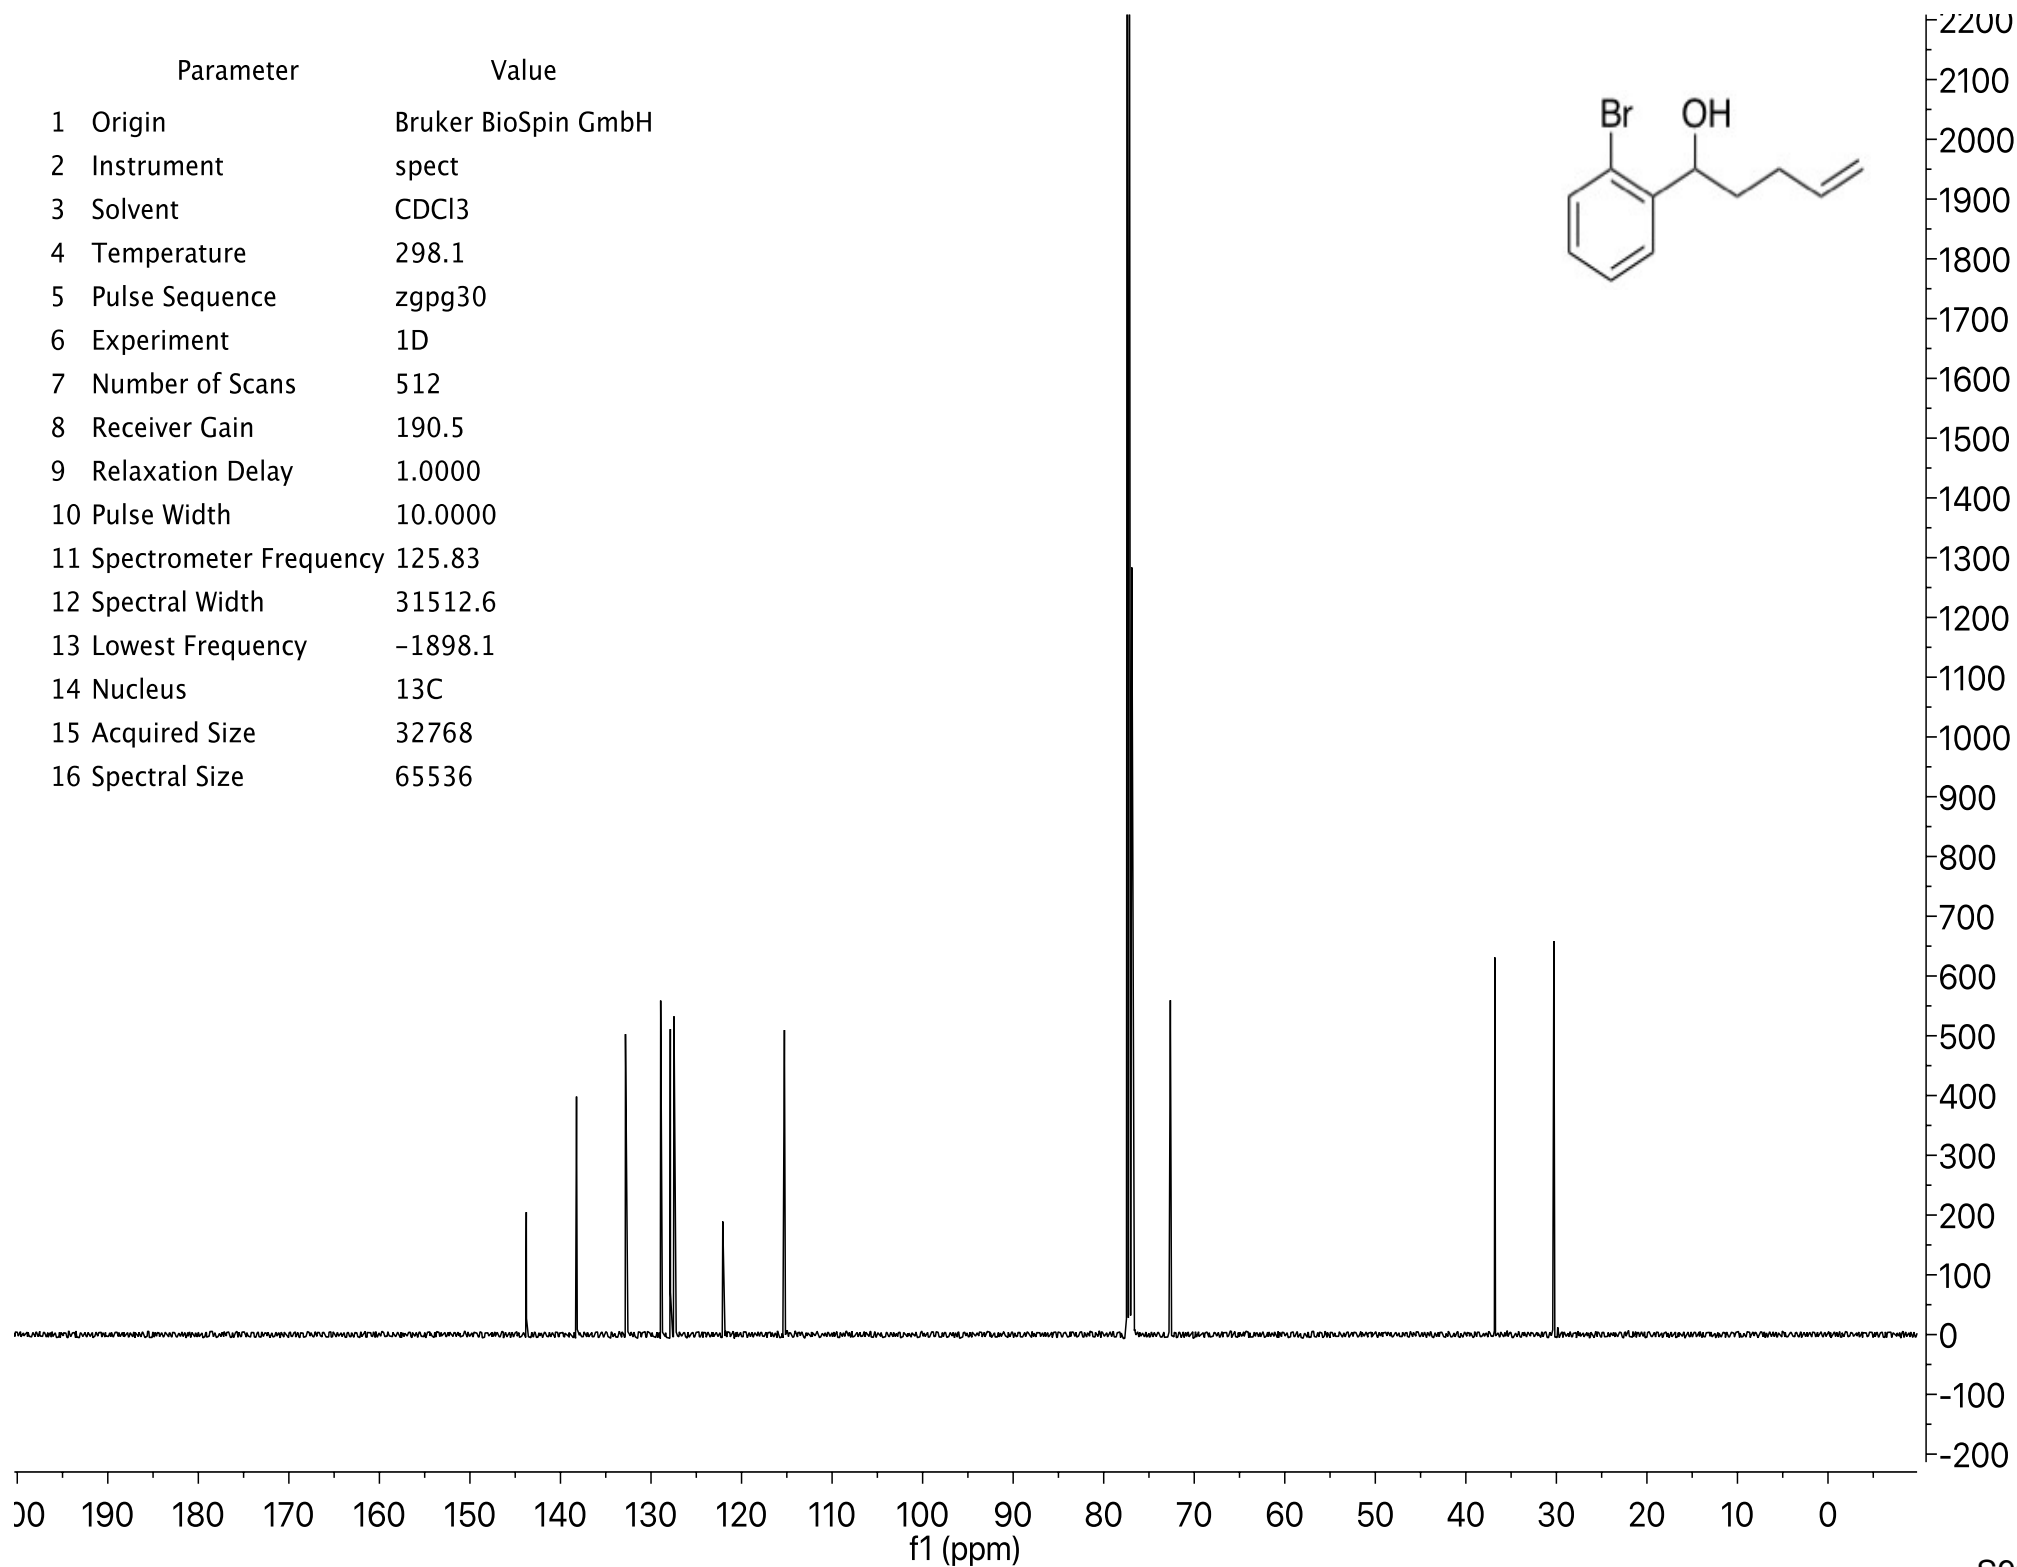

| Parameter                 | Value               |
|---------------------------|---------------------|
| 1 Origin                  | Bruker BioSpin GmbH |
| 2 Instrument              | spect               |
| 3 Solvent                 | CDCl3               |
| 4 Temperature             | 298.1               |
| 5 Pulse Sequence          | zg30                |
| 6 Experiment              | 1D                  |
| 7 Number of Scans         | 5                   |
| 8 Receiver Gain           | 61.8                |
| 9 Relaxation Delay        | 15.0000             |
| 10 Pulse Width            | 12.0000             |
| 11 Spectrometer Frequency | 500.35              |
| 12 Spectral Width         | 10000.0             |
| 13 Lowest Frequency       | -1921.8             |
| 14 Nucleus                | 1H                  |
| 15 Acquired Size          | 32768               |
| 16 Spectral Size          | 65536               |

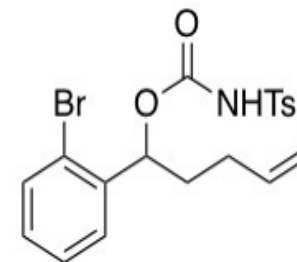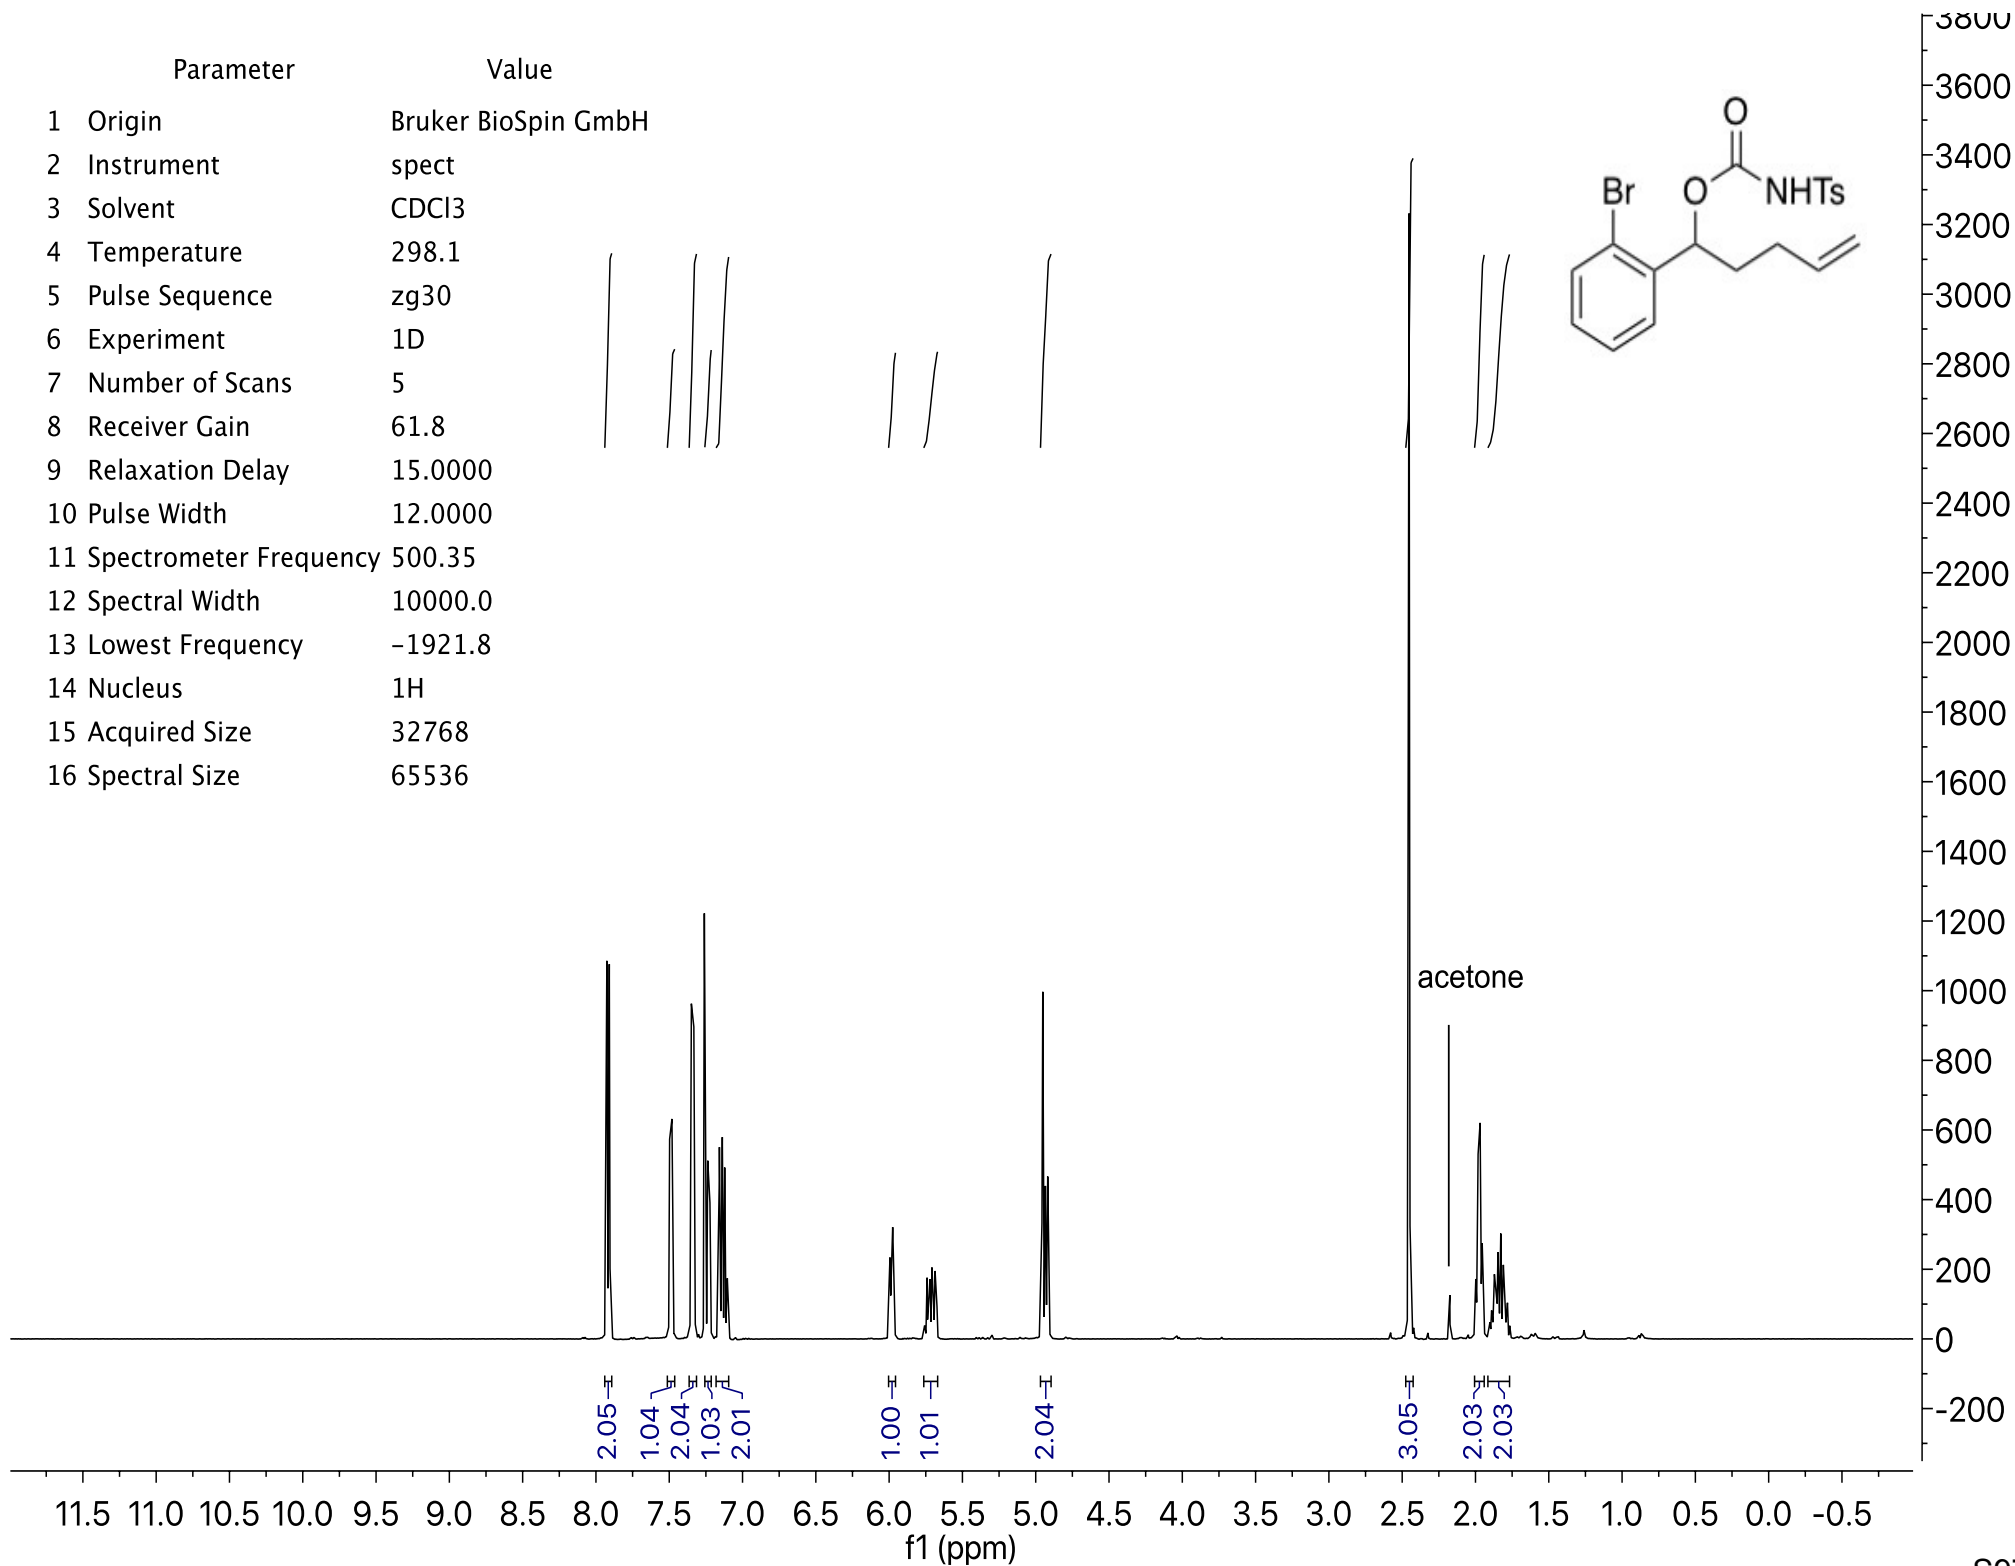

| Parameter                 | Value               |
|---------------------------|---------------------|
| 1 Origin                  | Bruker BioSpin GmbH |
| 2 Instrument              | spect               |
| 3 Solvent                 | CDCl3               |
| 4 Temperature             | 298.1               |
| 5 Pulse Sequence          | zgpg30              |
| 6 Experiment              | 1D                  |
| 7 Number of Scans         | 512                 |
| 8 Receiver Gain           | 190.5               |
| 9 Relaxation Delay        | 1.0000              |
| 10 Pulse Width            | 10.0000             |
| 11 Spectrometer Frequency | 125.83              |
| 12 Spectral Width         | 31512.6             |
| 13 Lowest Frequency       | -1899.1             |
| 14 Nucleus                | 13C                 |
| 15 Acquired Size          | 32768               |
| 16 Spectral Size          | 65536               |

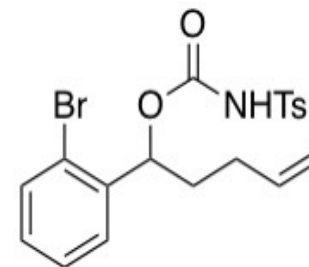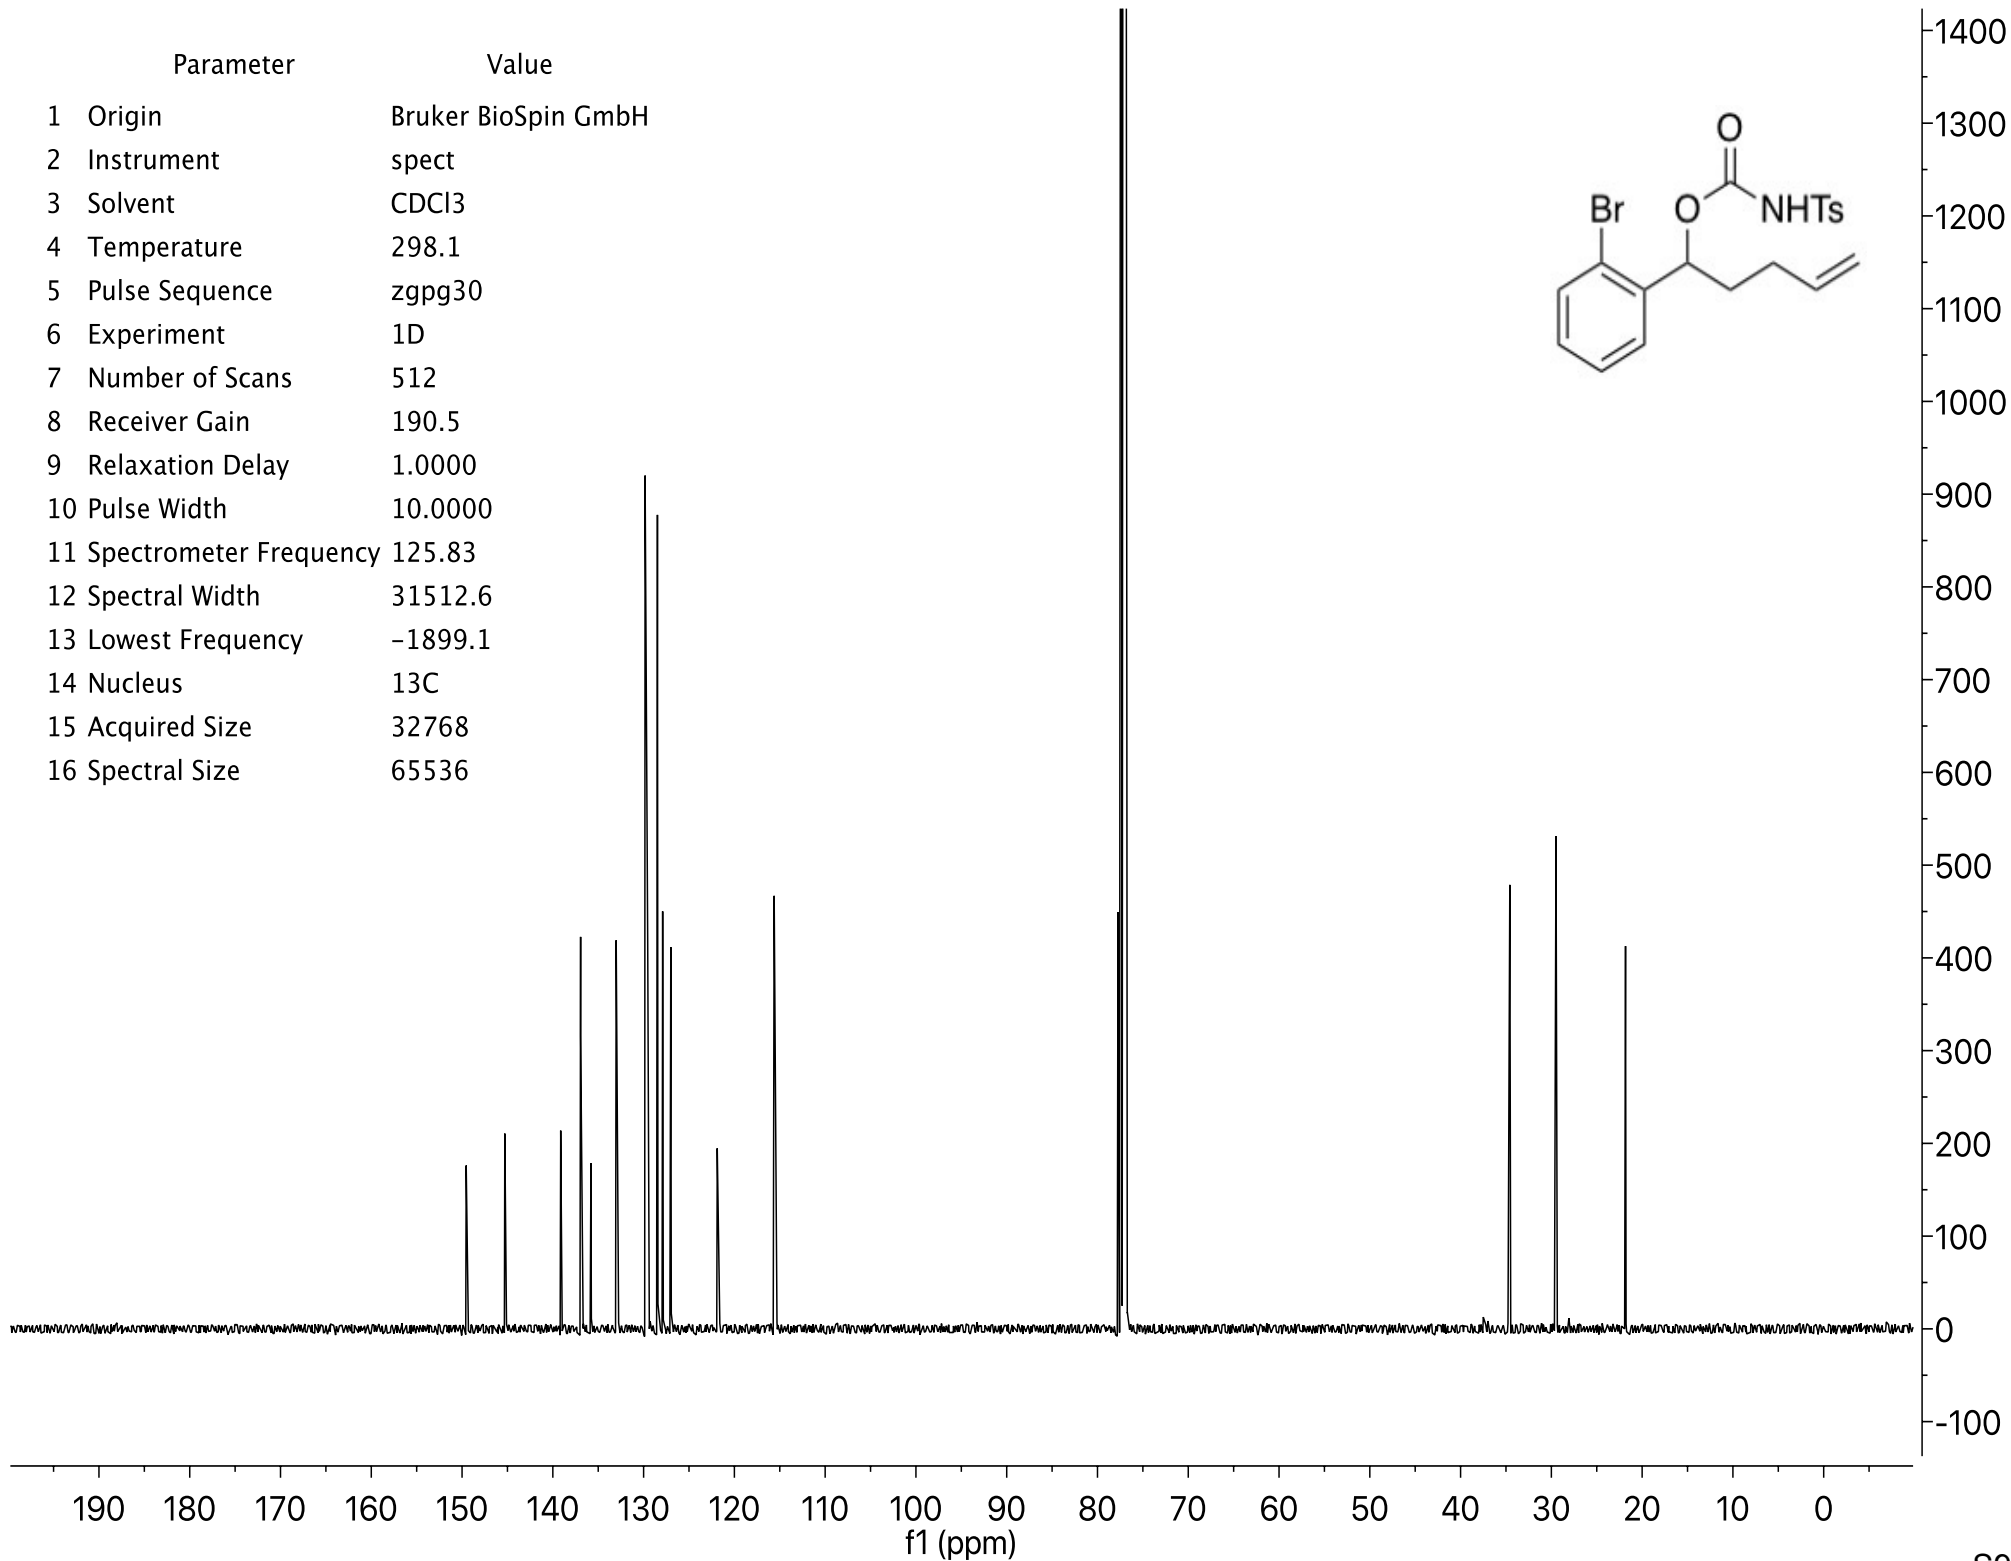

160-100ppm

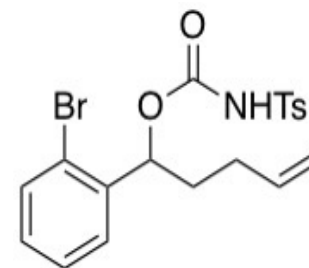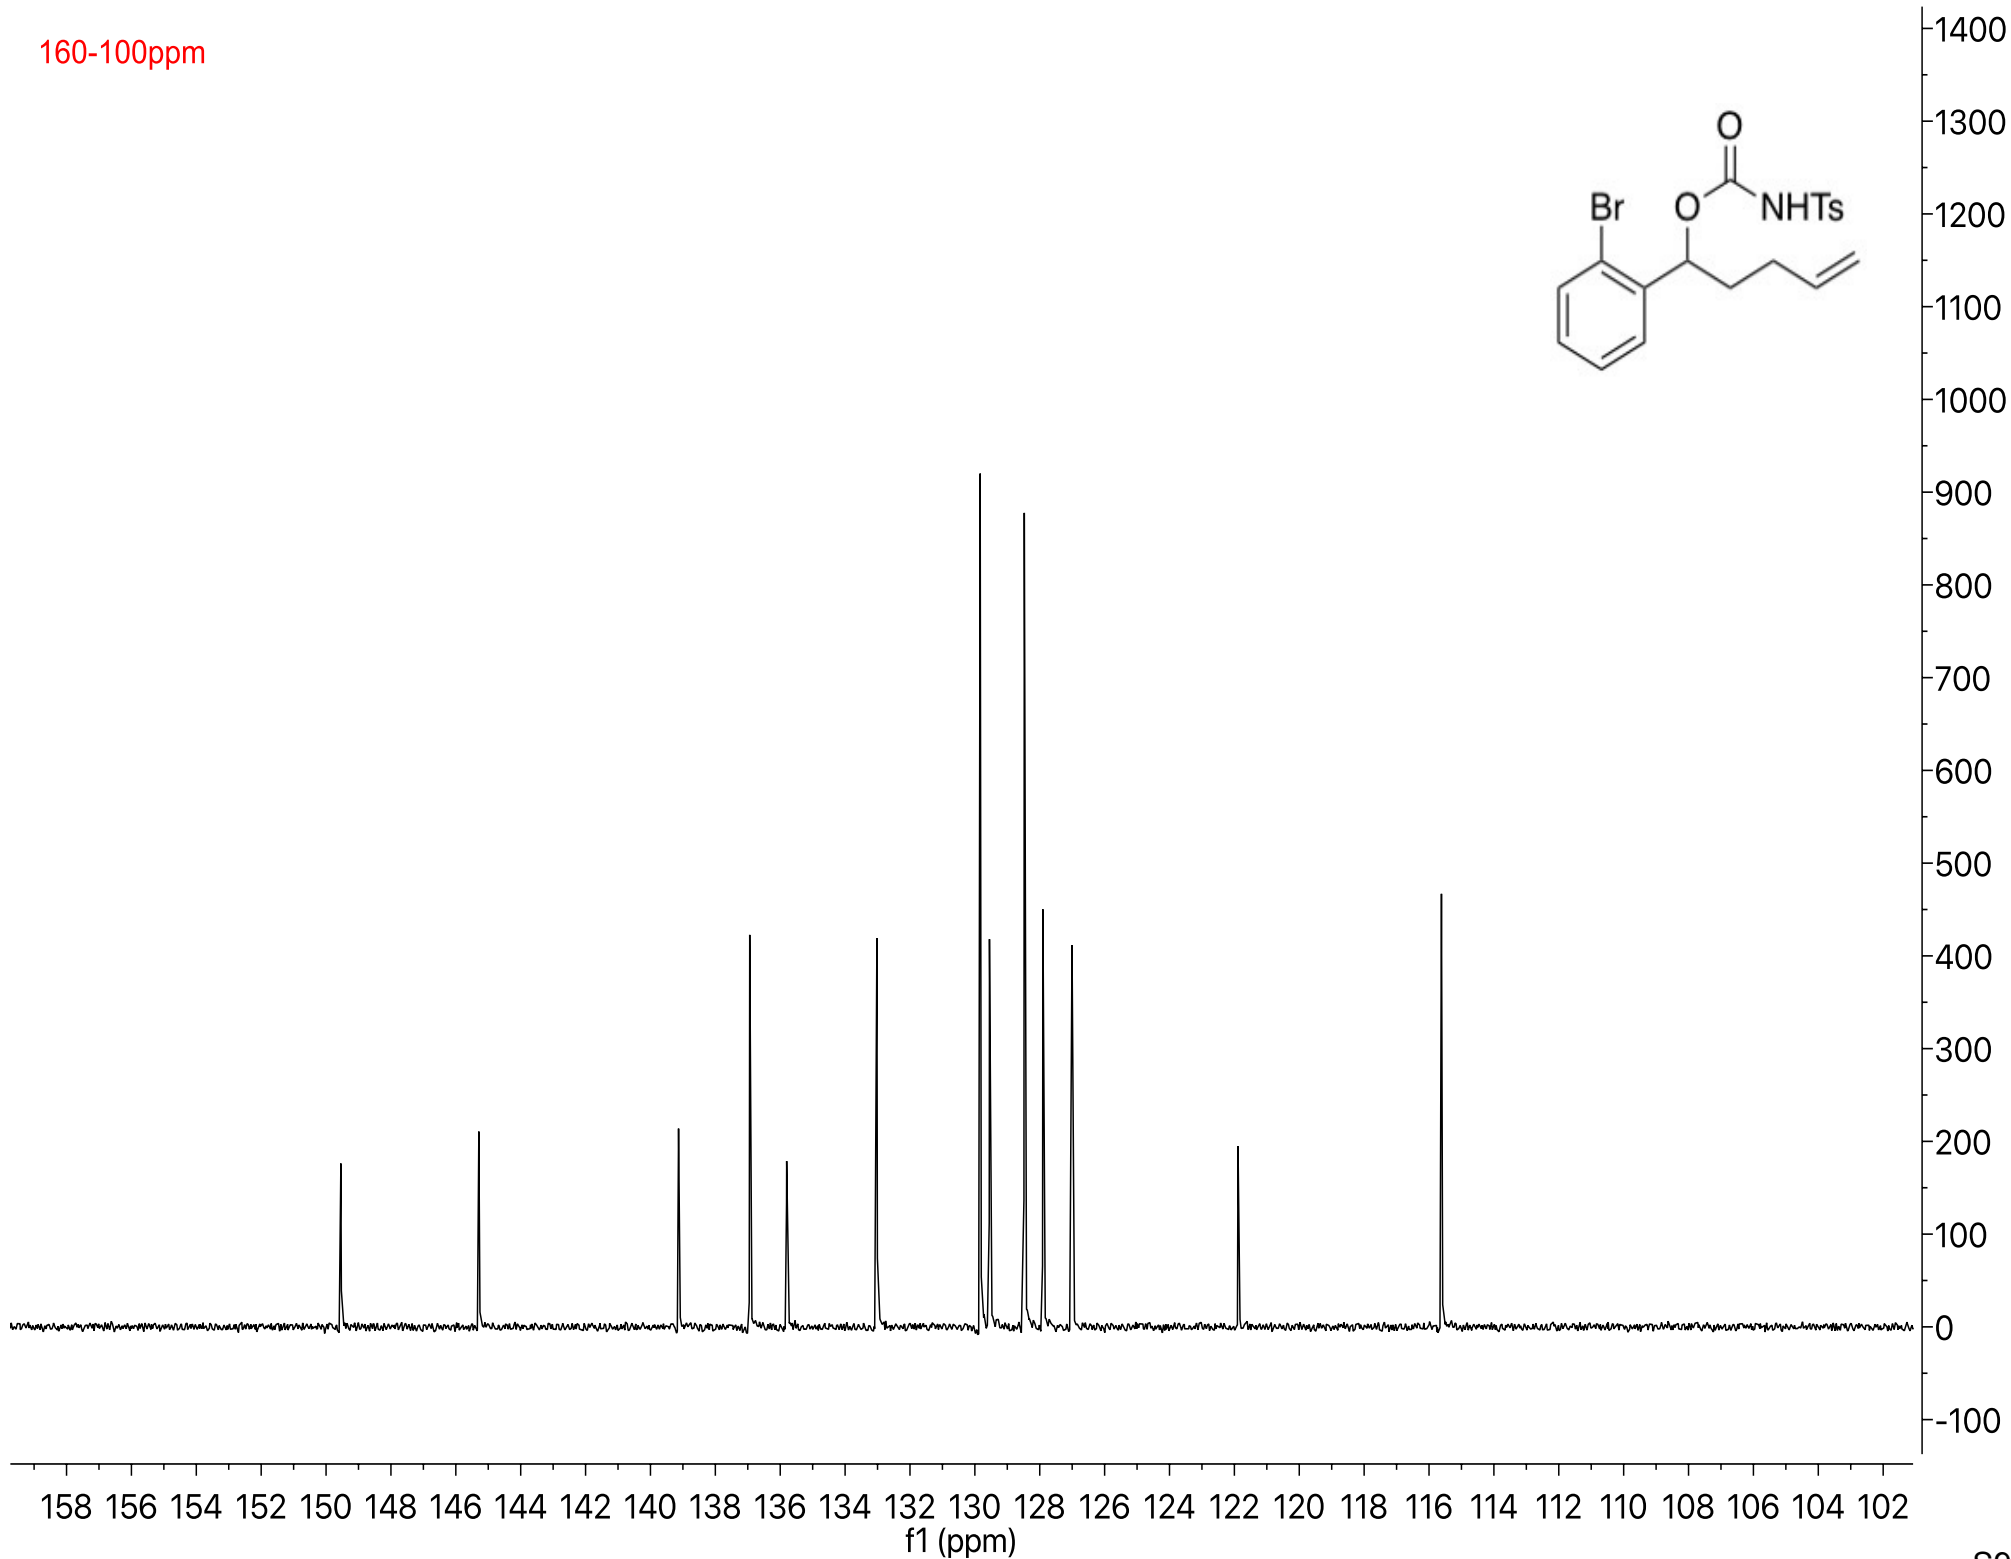

| Parameter                 | Value               |
|---------------------------|---------------------|
| 1 Origin                  | Bruker BioSpin GmbH |
| 2 Instrument              | spect               |
| 3 Solvent                 | CDCl3               |
| 4 Temperature             | 298.0               |
| 5 Pulse Sequence          | zg30                |
| 6 Experiment              | 1D                  |
| 7 Number of Scans         | 16                  |
| 8 Receiver Gain           | 29.7                |
| 9 Relaxation Delay        | 20.0000             |
| 10 Pulse Width            | 12.0000             |
| 11 Spectrometer Frequency | 500.35              |
| 12 Spectral Width         | 10000.0             |
| 13 Lowest Frequency       | -1911.8             |
| 14 Nucleus                | 1H                  |
| 15 Acquired Size          | 32768               |
| 16 Spectral Size          | 65536               |

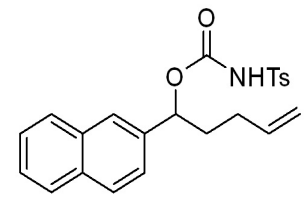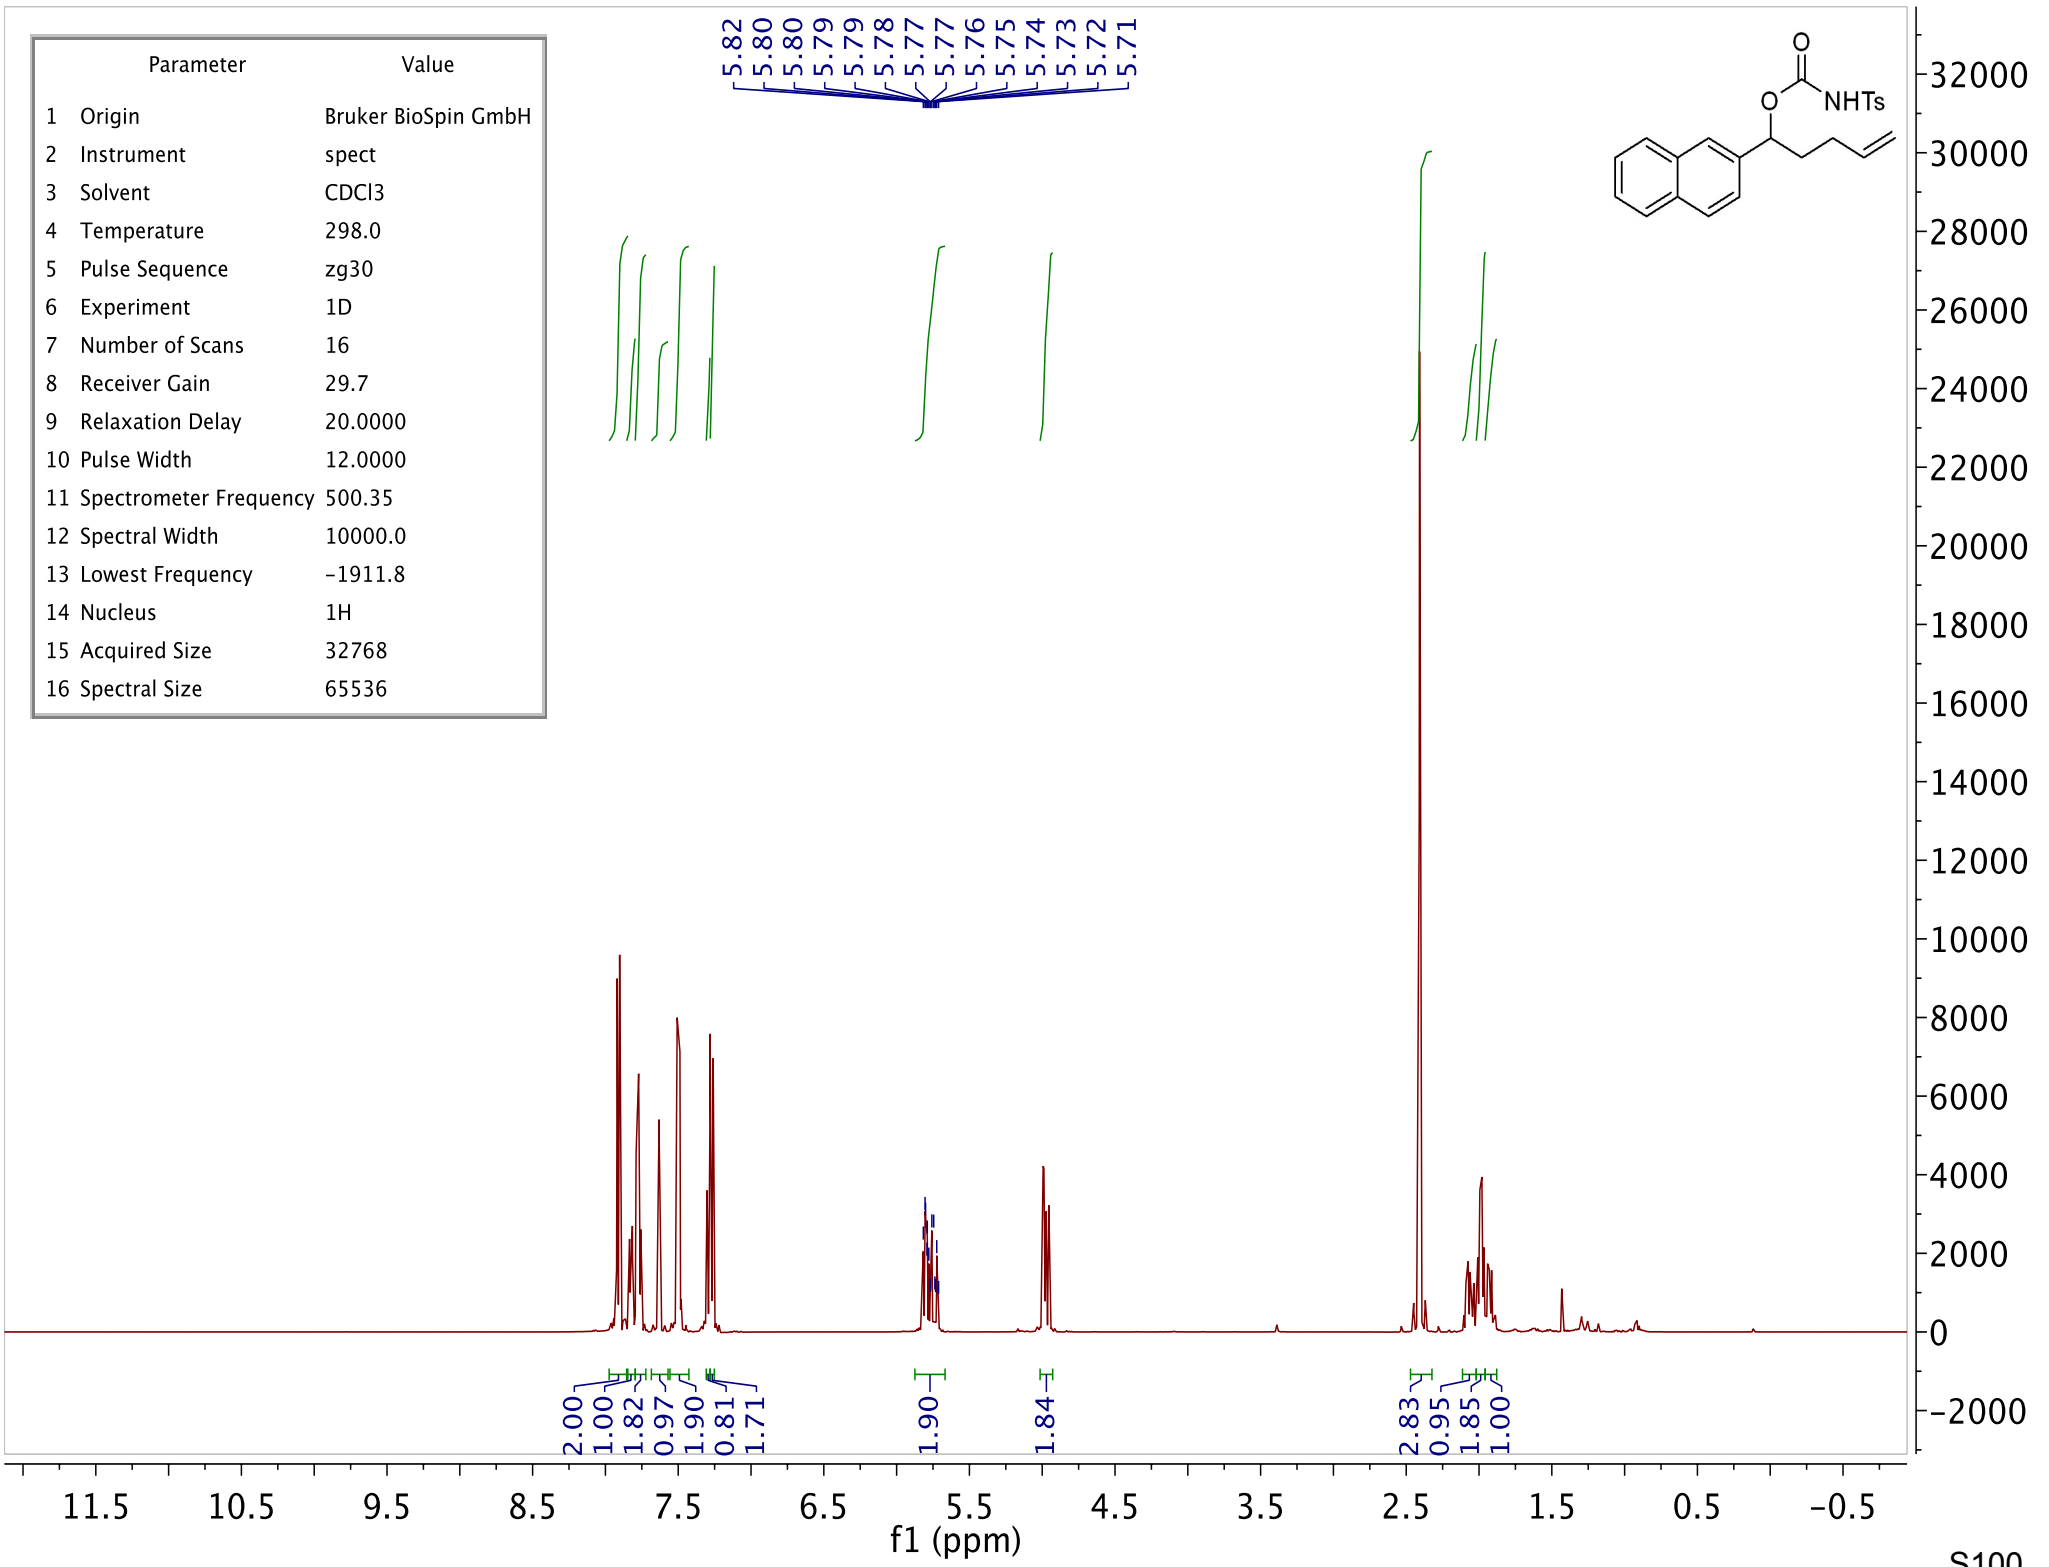

5.82  
5.80  
5.80  
5.79  
5.79  
5.78  
5.77  
5.77  
5.76  
5.75  
5.74  
5.73  
5.72  
5.71

| Parameter                 | Value               |
|---------------------------|---------------------|
| 1 Origin                  | Bruker BioSpin GmbH |
| 2 Instrument              | spect               |
| 3 Solvent                 | CDCl3               |
| 4 Temperature             | 298.0               |
| 5 Pulse Sequence          | zgpg30              |
| 6 Experiment              | 1D                  |
| 7 Number of Scans         | 128                 |
| 8 Receiver Gain           | 190.5               |
| 9 Relaxation Delay        | 2.0000              |
| 10 Pulse Width            | 10.0000             |
| 11 Spectrometer Frequency | 125.83              |
| 12 Spectral Width         | 31512.6             |
| 13 Lowest Frequency       | -1905.8             |
| 14 Nucleus                | <sup>13</sup> C     |
| 15 Acquired Size          | 32768               |
| 16 Spectral Size          | 65536               |

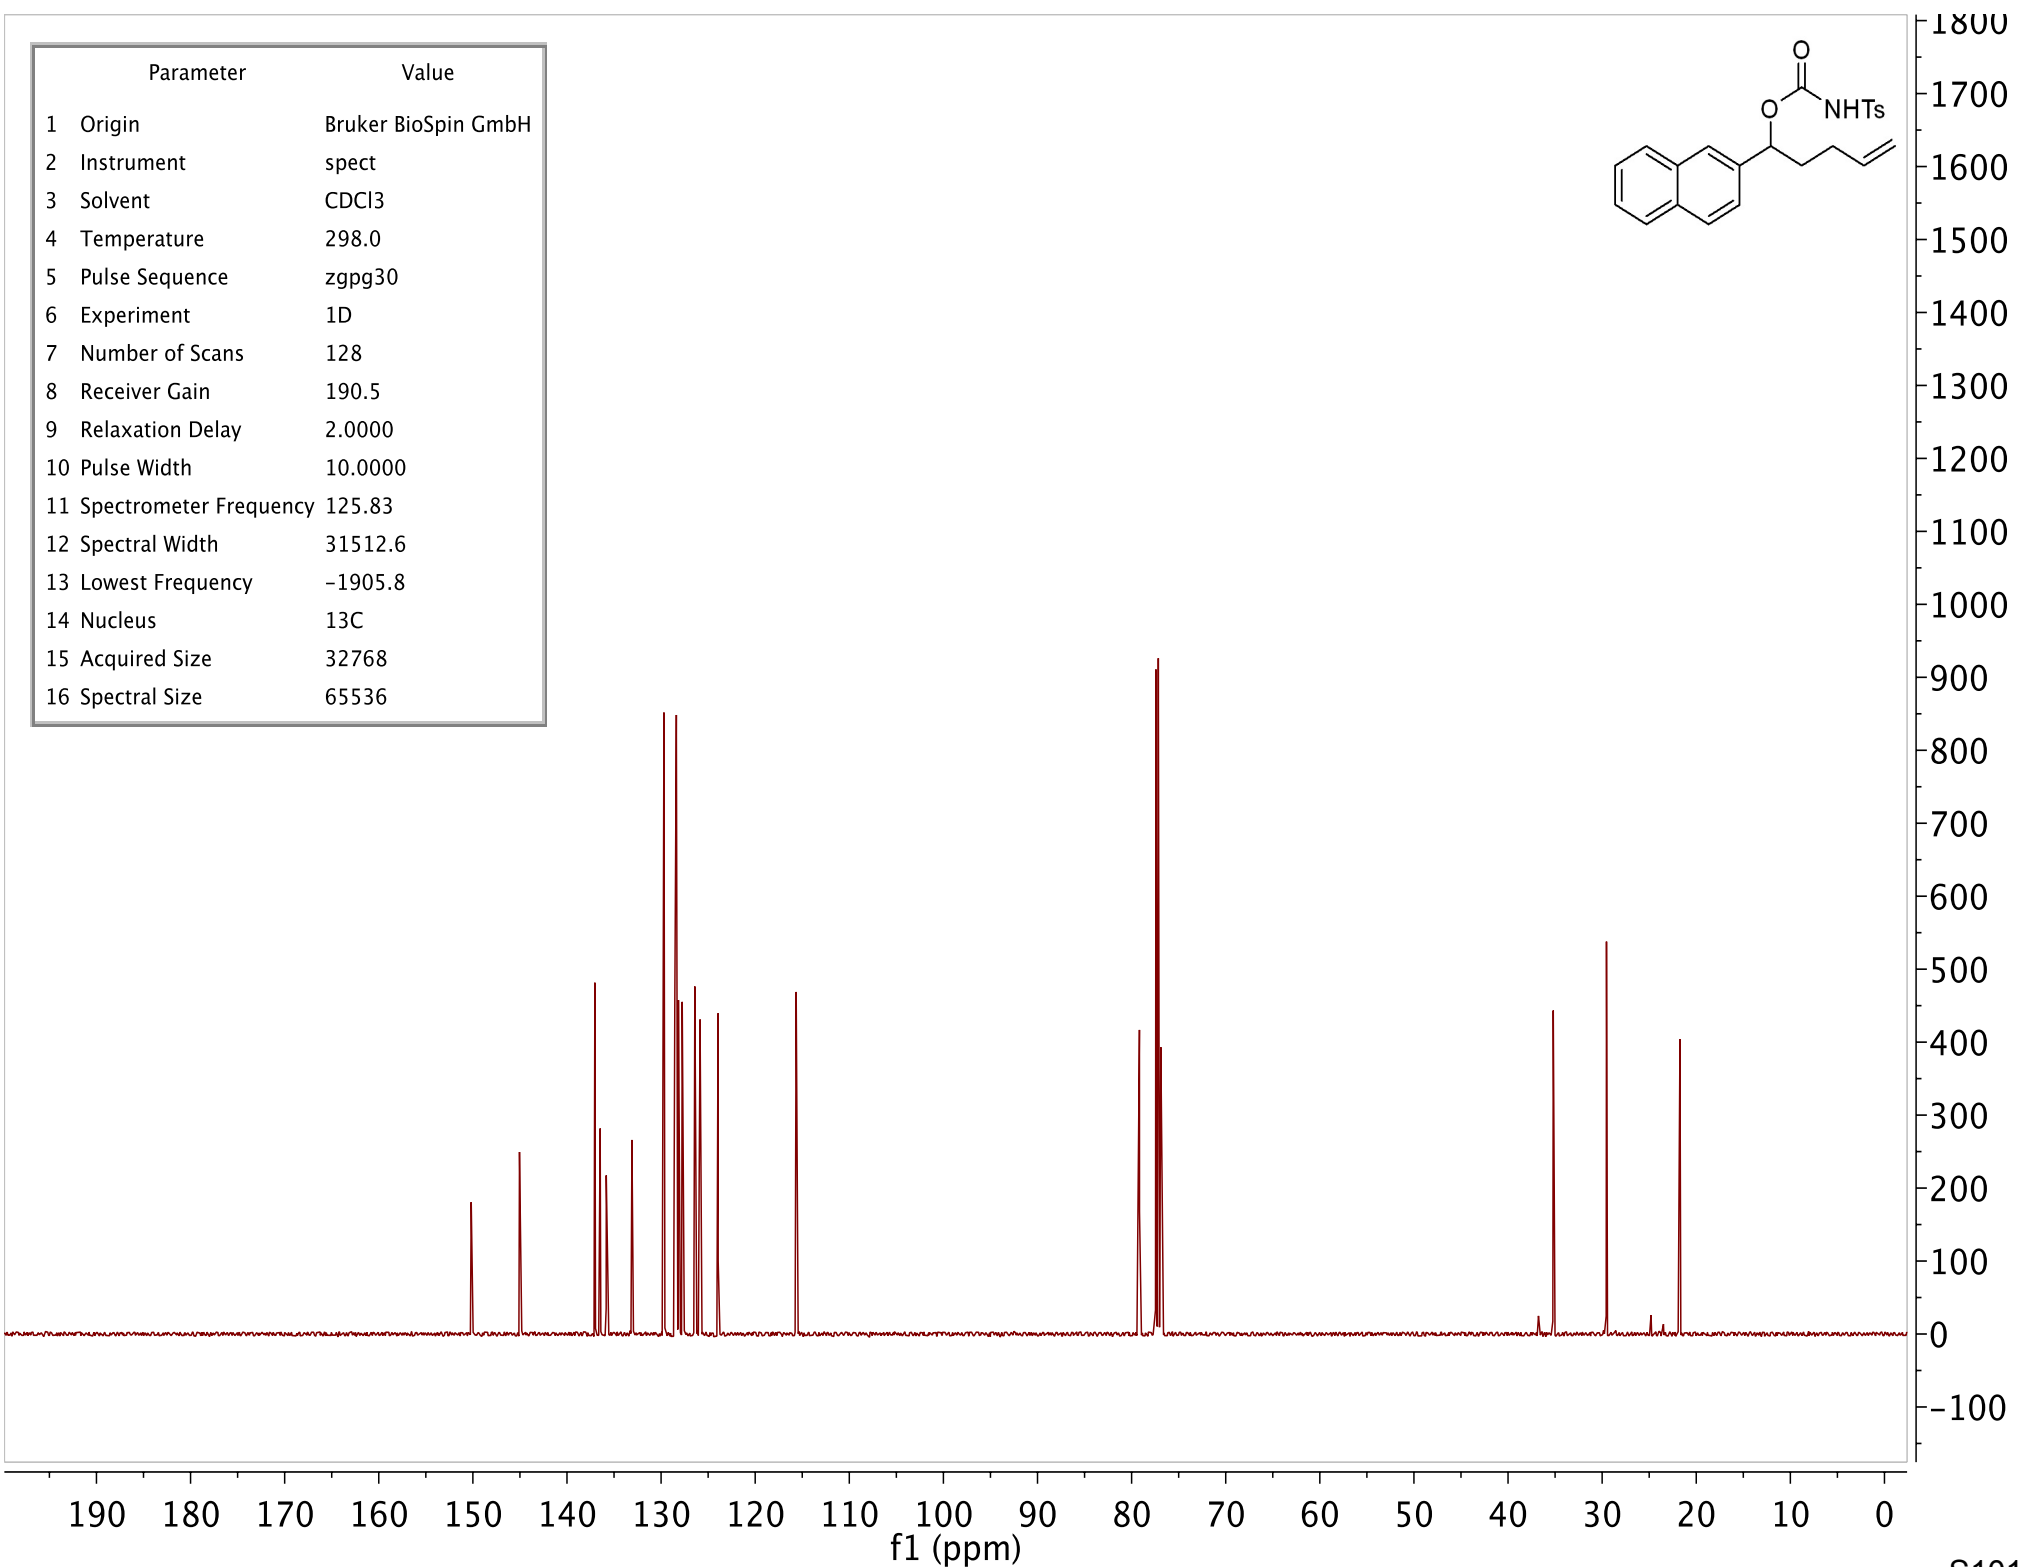

160-100ppm

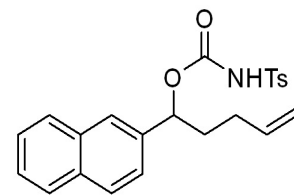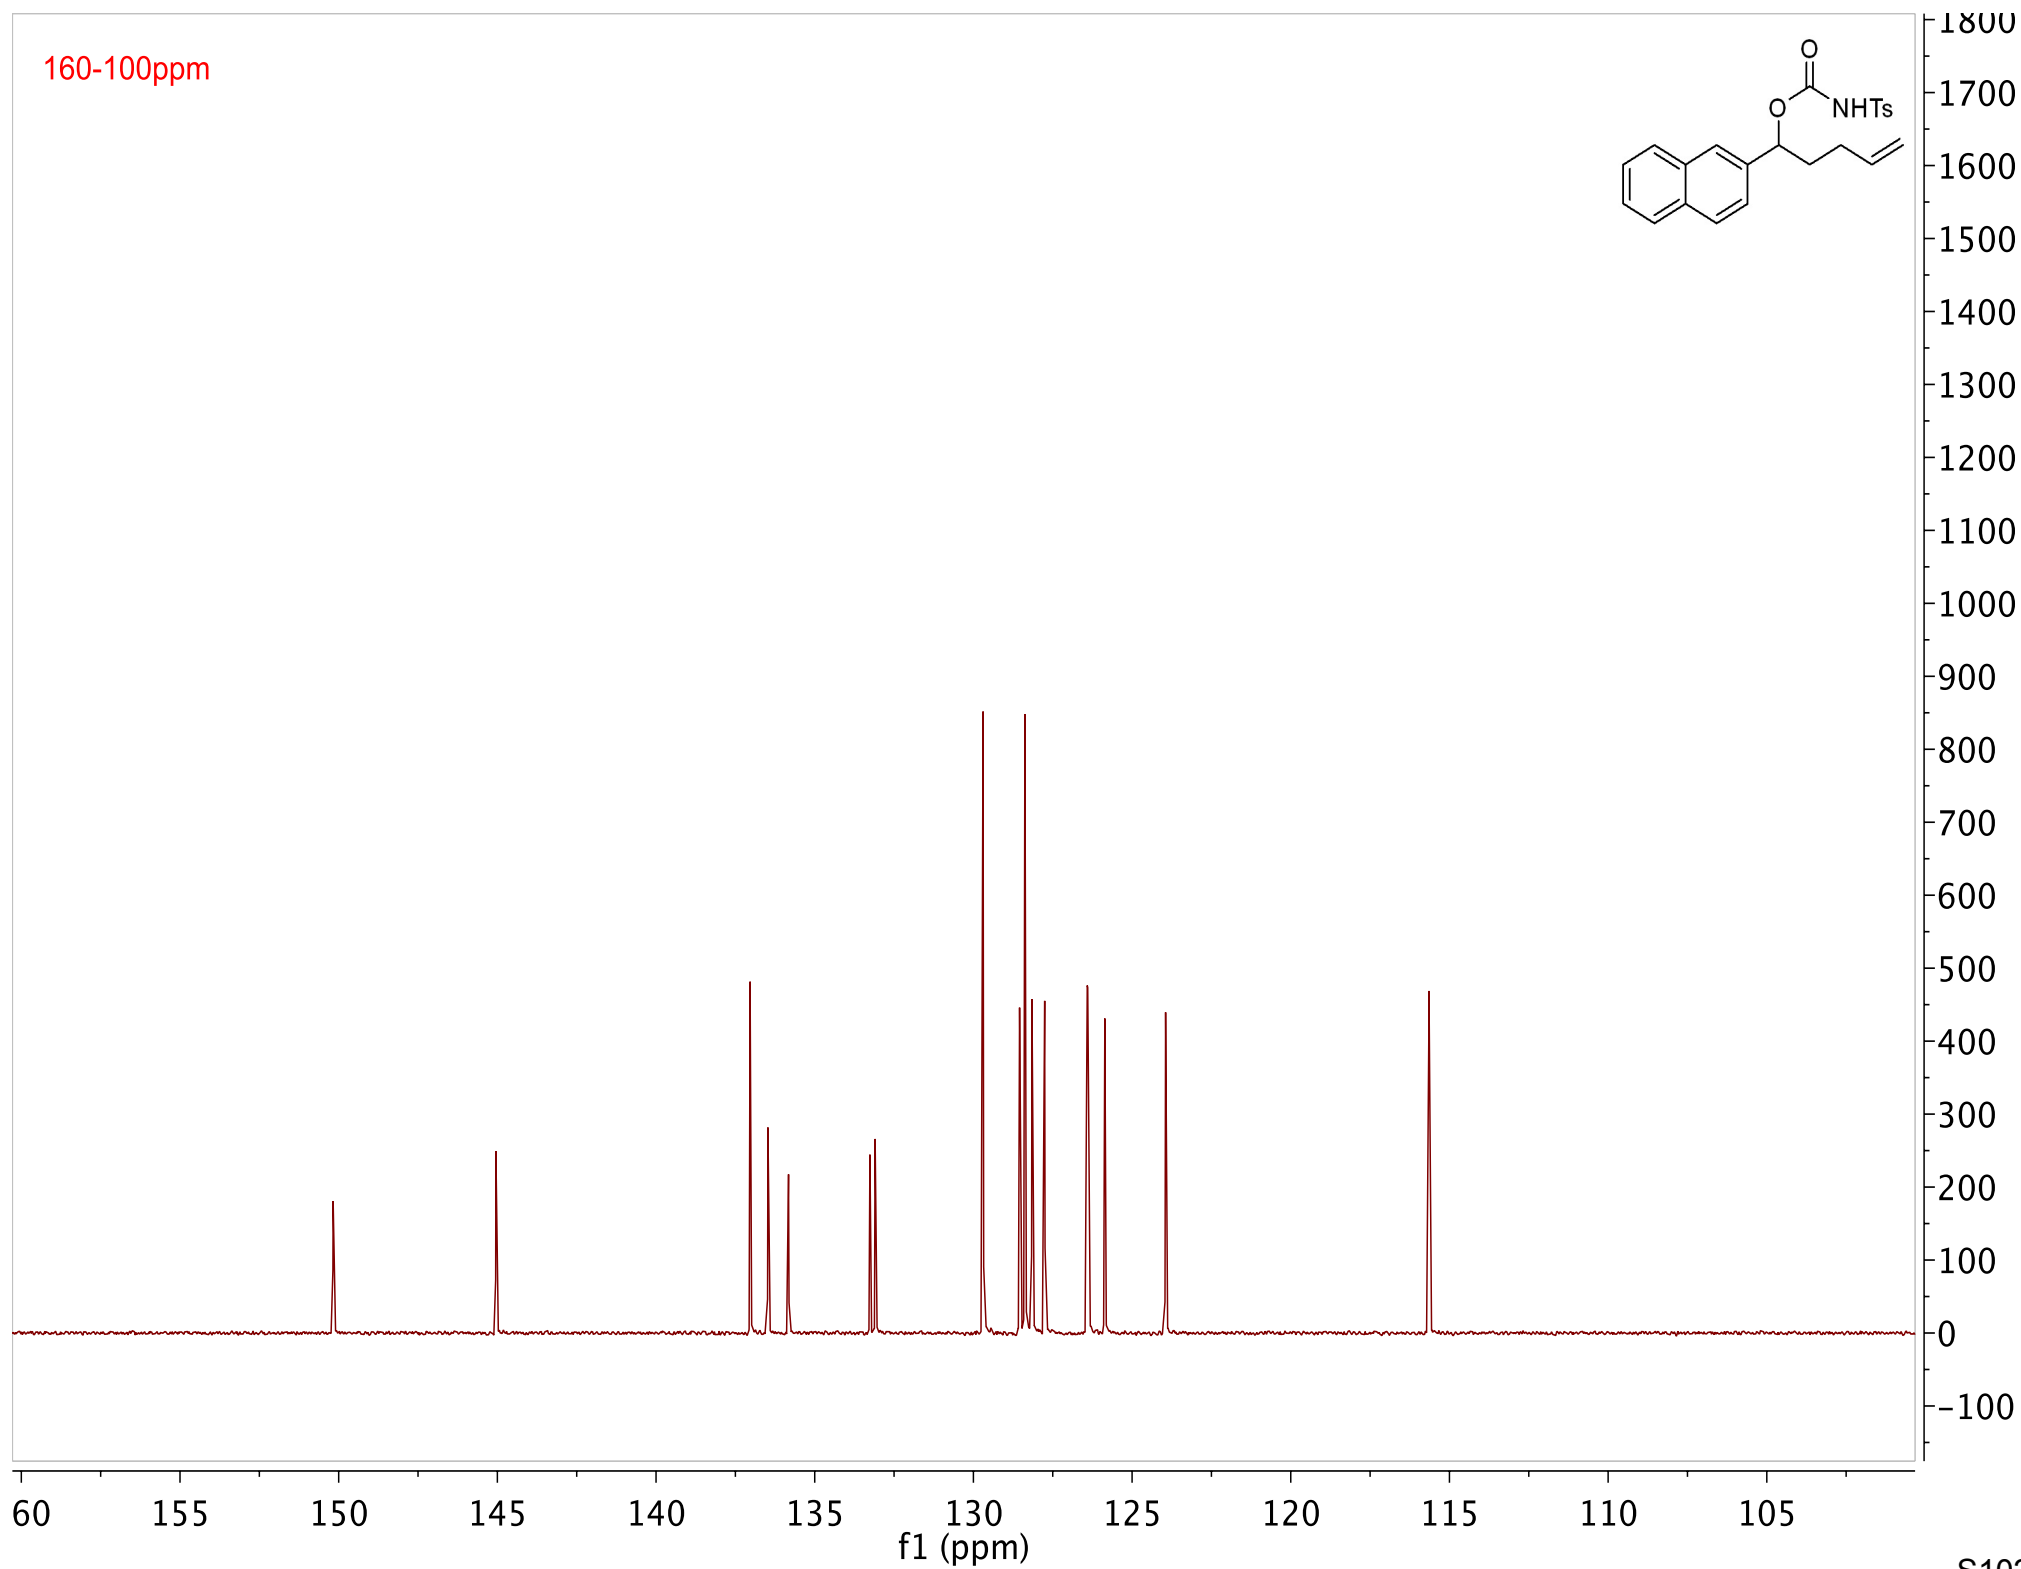



| Parameter                 | Value               |
|---------------------------|---------------------|
| 1 Origin                  | Bruker BioSpin GmbH |
| 2 Instrument              | spect               |
| 3 Solvent                 | CDCl3               |
| 4 Temperature             | 298.1               |
| 5 Pulse Sequence          | zg30                |
| 6 Experiment              | 1D                  |
| 7 Number of Scans         | 16                  |
| 8 Receiver Gain           | 29.7                |
| 9 Relaxation Delay        | 1.0000              |
| 10 Pulse Width            | 12.0000             |
| 11 Spectrometer Frequency | 500.35              |
| 12 Spectral Width         | 10000.0             |
| 13 Lowest Frequency       | -1920.8             |
| 14 Nucleus                | 1H                  |
| 15 Acquired Size          | 32768               |
| 16 Spectral Size          | 65536               |

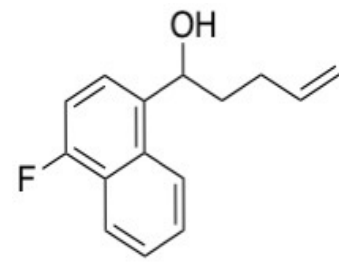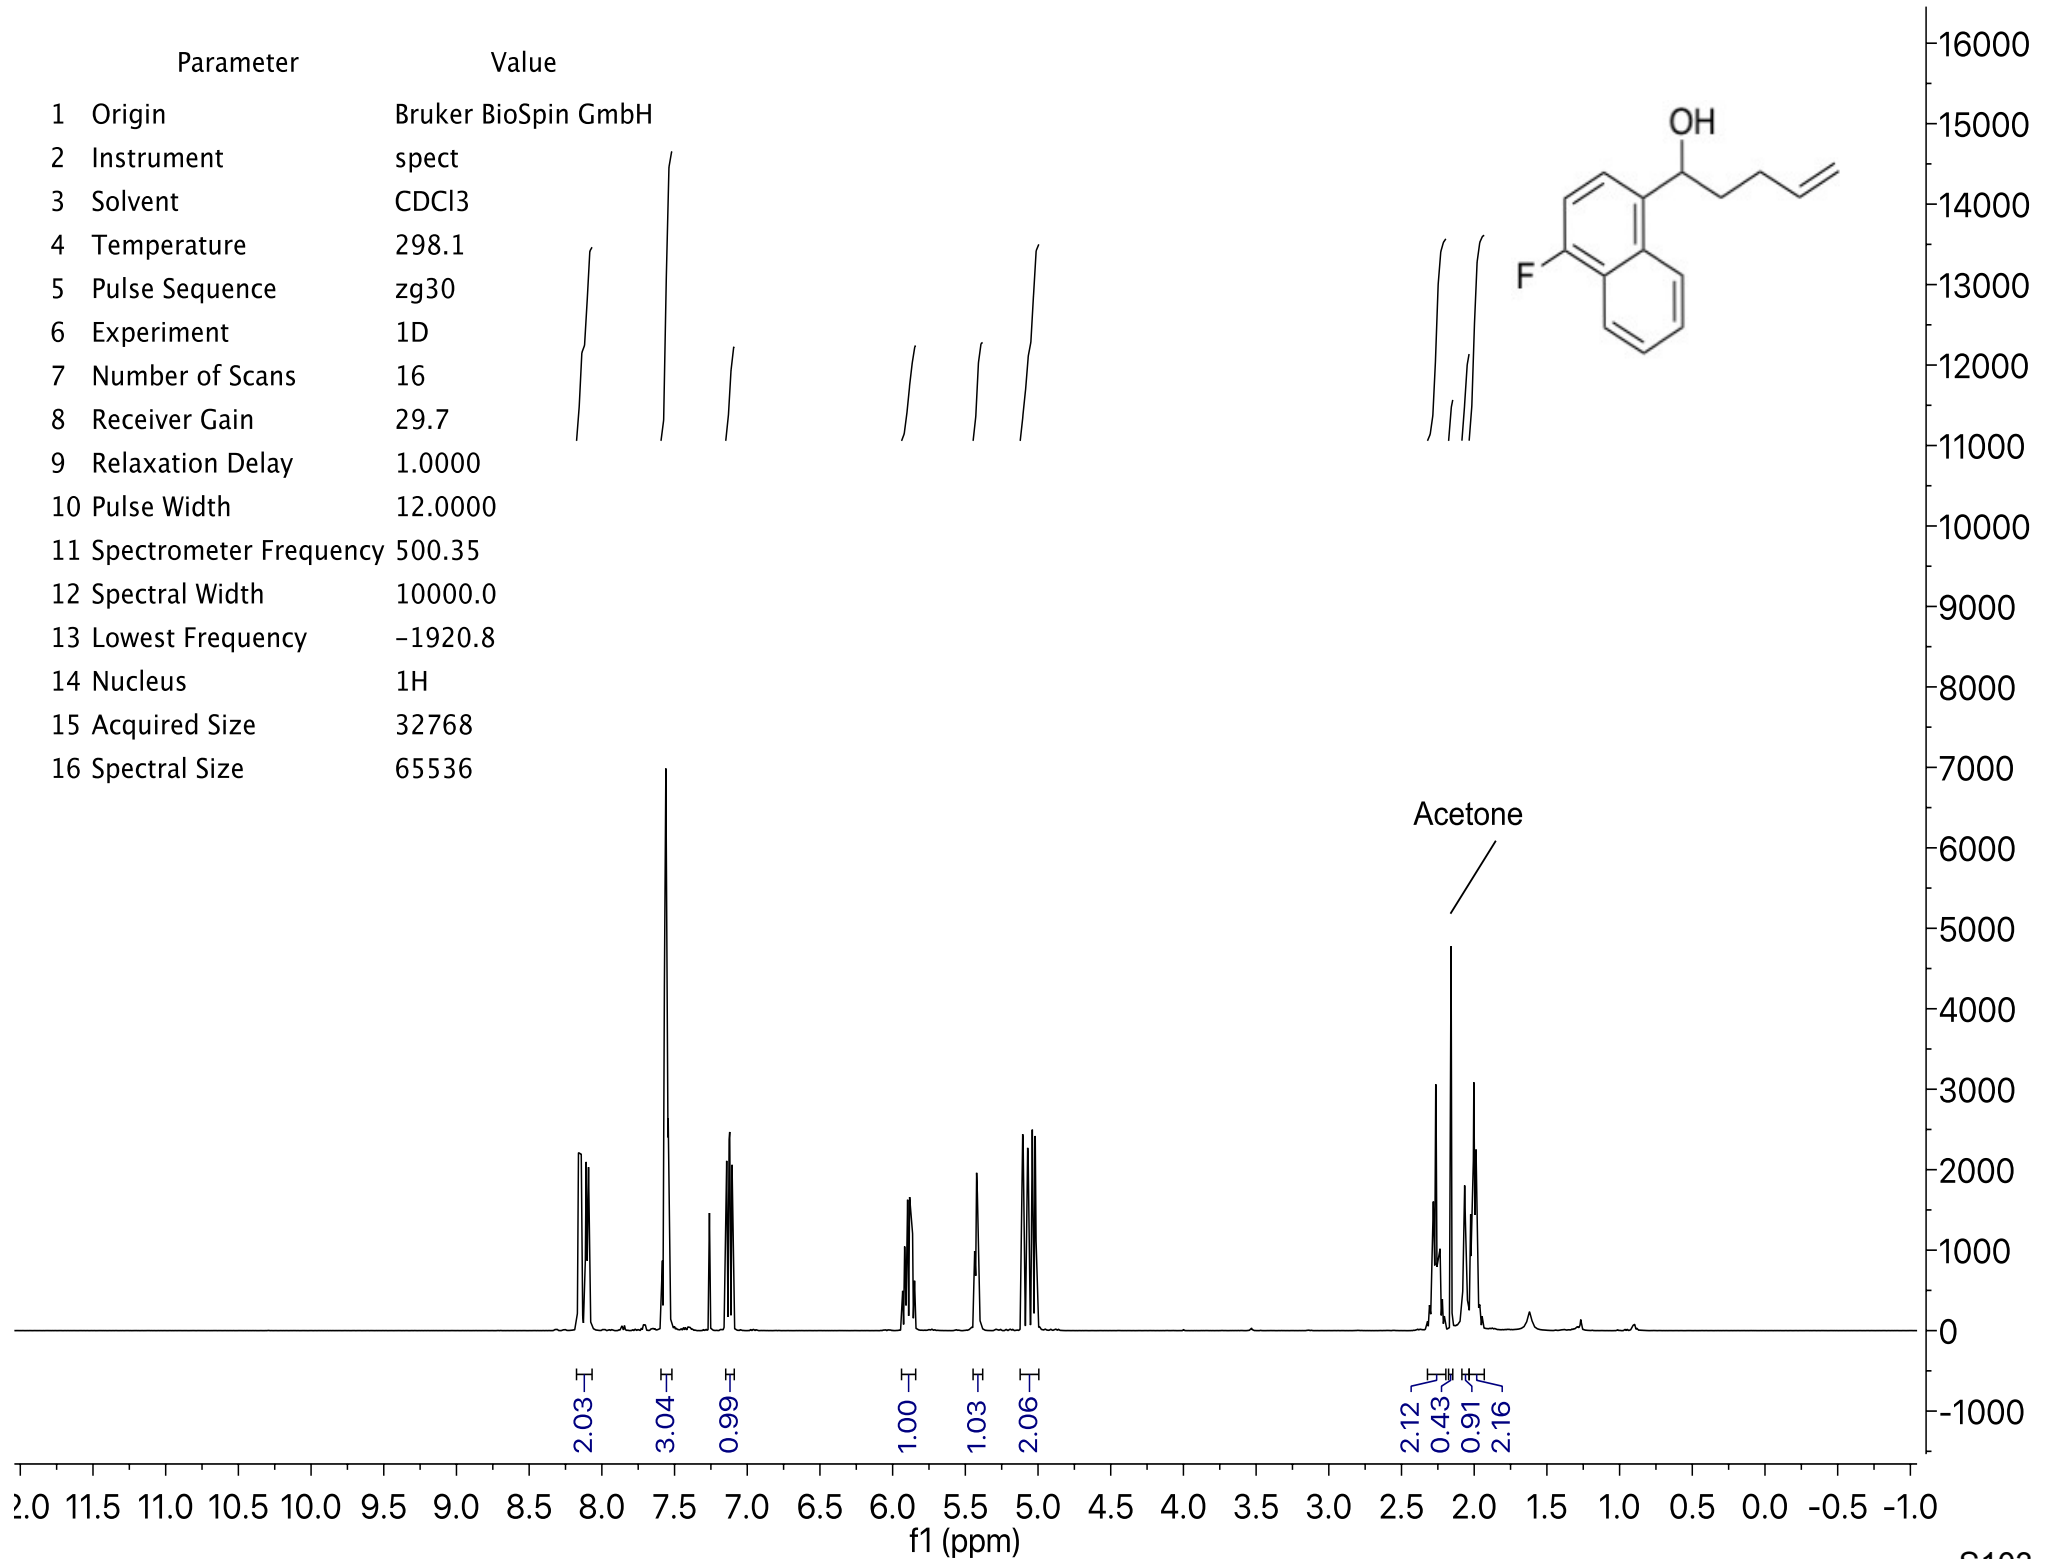

| Parameter                 | Value               |
|---------------------------|---------------------|
| 1 Origin                  | Bruker BioSpin GmbH |
| 2 Instrument              | spect               |
| 3 Solvent                 | CDCl3               |
| 4 Temperature             | 298.1               |
| 5 Pulse Sequence          | zgpg30              |
| 6 Experiment              | 1D                  |
| 7 Number of Scans         | 128                 |
| 8 Receiver Gain           | 190.5               |
| 9 Relaxation Delay        | 2.0000              |
| 10 Pulse Width            | 10.0000             |
| 11 Spectrometer Frequency | 125.83              |
| 12 Spectral Width         | 31512.6             |
| 13 Lowest Frequency       | -1900.6             |
| 14 Nucleus                | <sup>13</sup> C     |
| 15 Acquired Size          | 32768               |
| 16 Spectral Size          | 65536               |

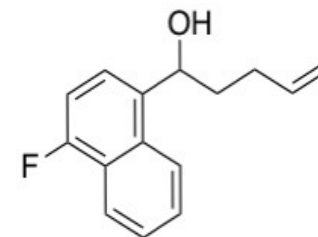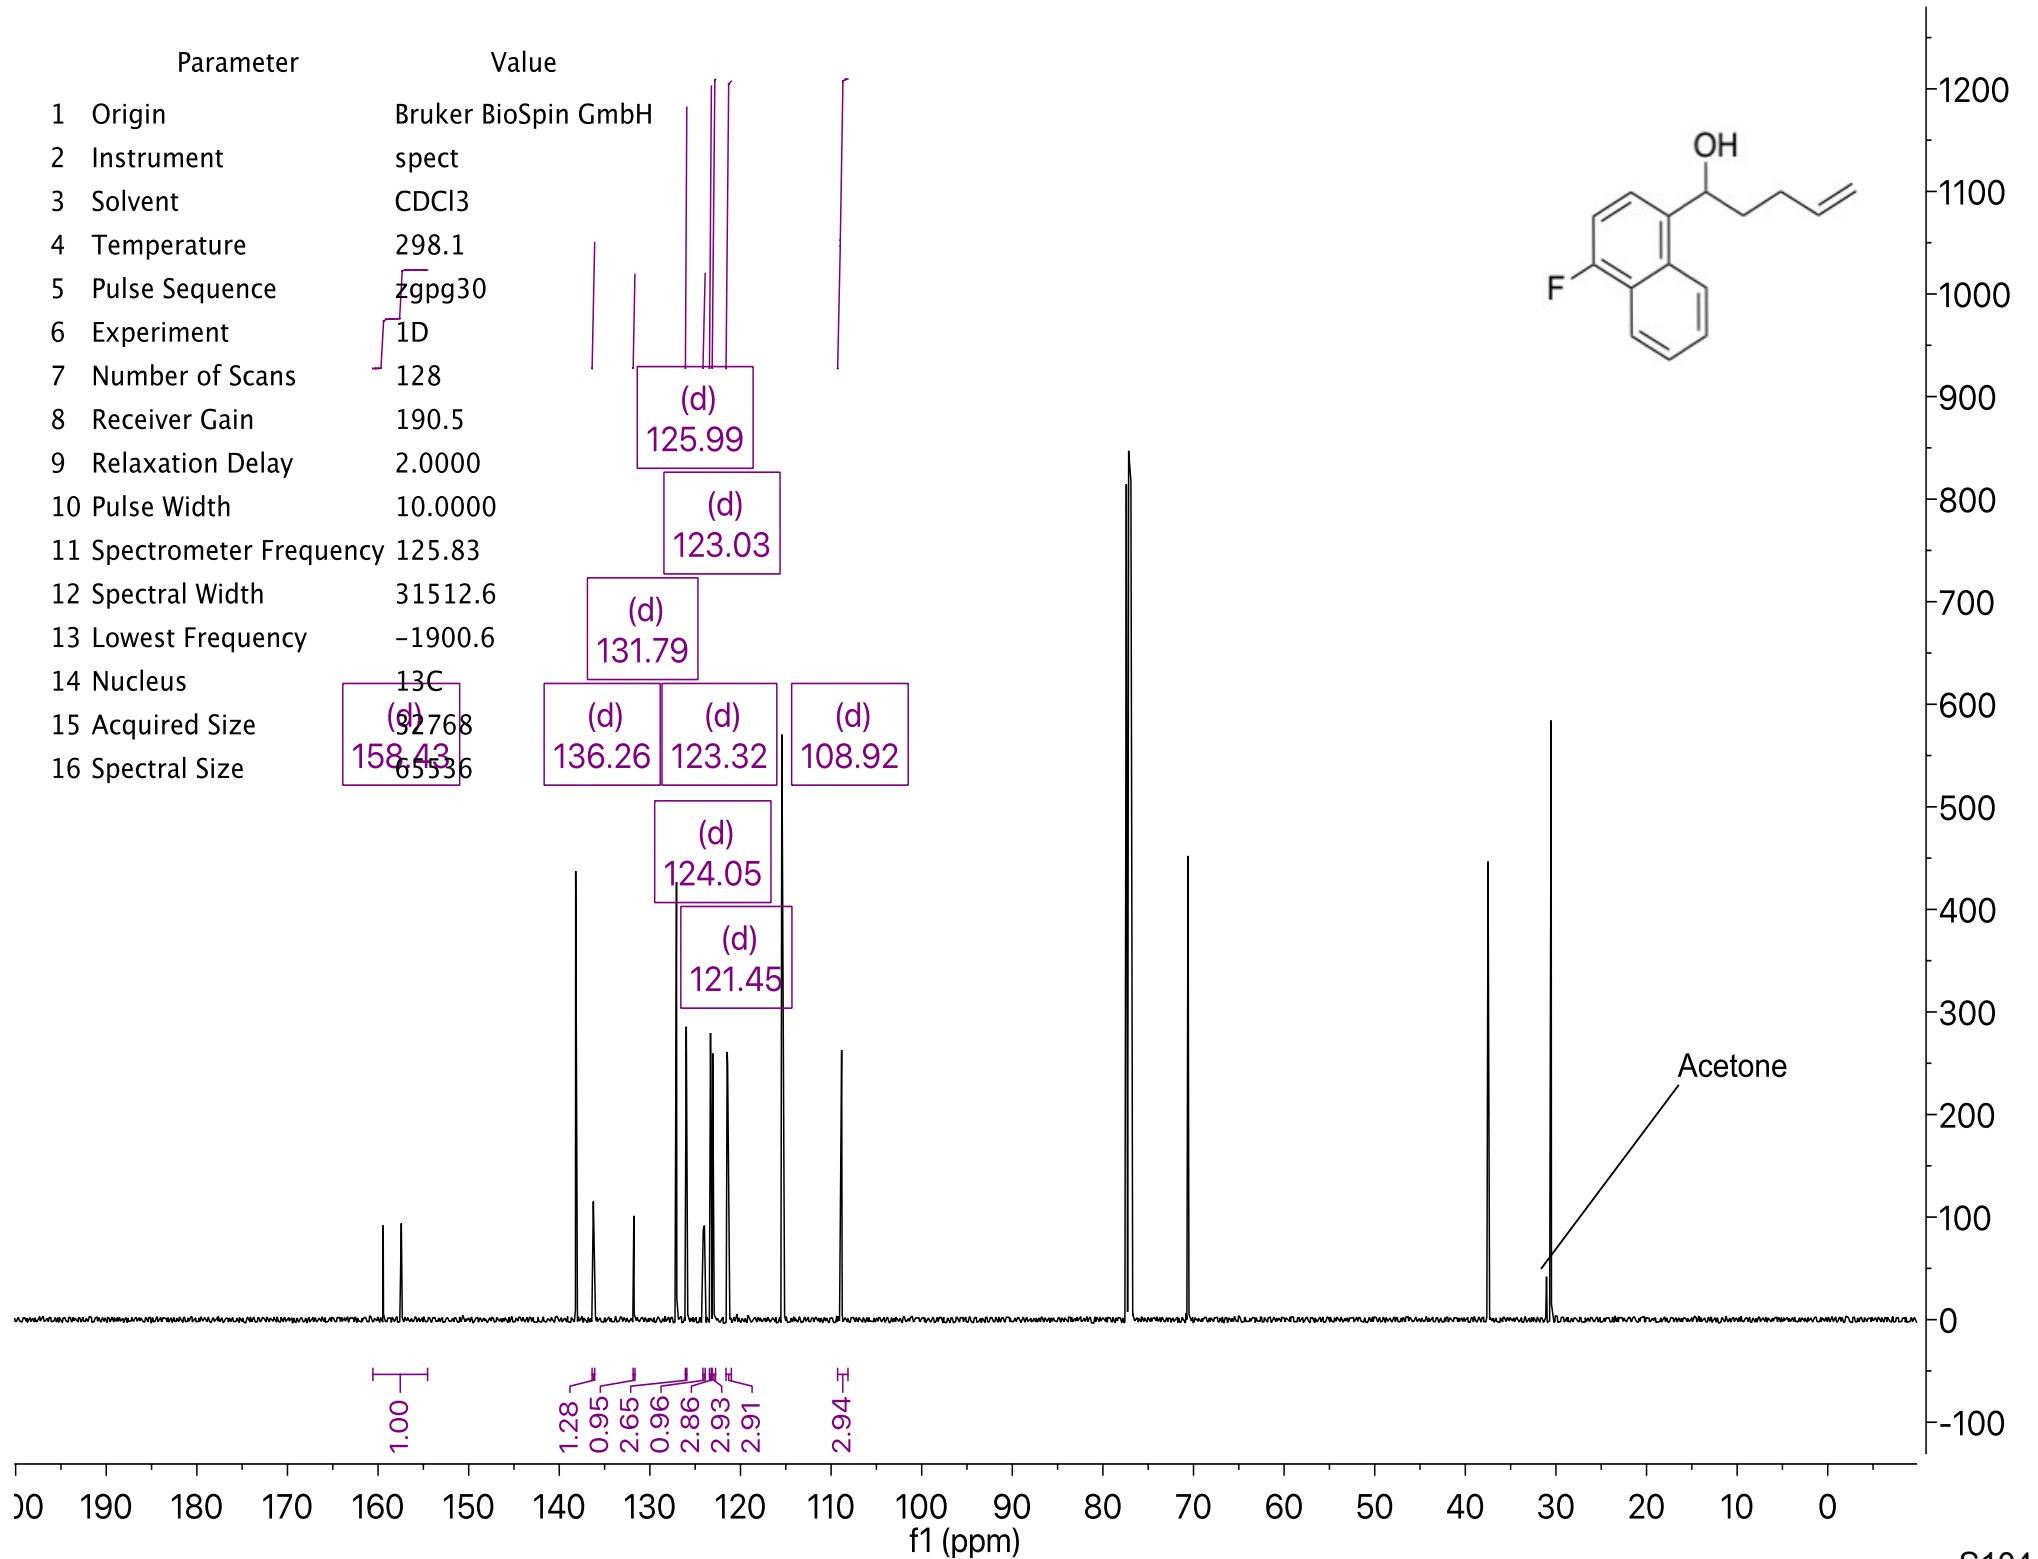

170-100 ppm

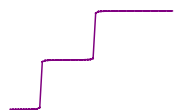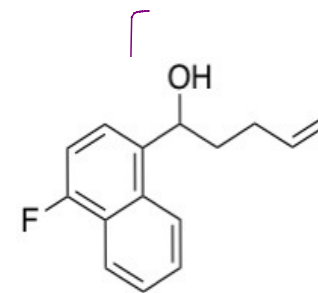

(d)  
158.43  
 $^1J_{CF} = 251.5 \text{ Hz}$

(d) 136.26 (d) 131.79

(d) 125.99 (d) 121.45

(d) 123.32

(d) 124.05

(d) 123.03

$^2J_{CF} = 16.2 \text{ Hz}$

(d) 108.92

$^2J_{CF} = 19.8 \text{ Hz}$

1.00

1.28

0.95

2.65

0.96

2.86

2.93

2.91

2.94

165 160 155 150 145 140 135 130 125 120 115 110 105 100  
f1 (ppm)

1200  
1100  
1000  
900  
800  
700  
600  
500  
400  
300  
200  
100  
0  
-100

| Parameter                 | Value               |
|---------------------------|---------------------|
| 1 Origin                  | Bruker BioSpin GmbH |
| 2 Instrument              | spect               |
| 3 Solvent                 | CDCl3               |
| 4 Temperature             | 298.2               |
| 5 Pulse Sequence          | zg30                |
| 6 Experiment              | 1D                  |
| 7 Number of Scans         | 16                  |
| 8 Receiver Gain           | 137.4               |
| 9 Relaxation Delay        | 15.0000             |
| 10 Pulse Width            | 12.0000             |
| 11 Spectrometer Frequency | 500.35              |
| 12 Spectral Width         | 10000.0             |
| 13 Lowest Frequency       | -1910.3             |
| 14 Nucleus                | 1H                  |
| 15 Acquired Size          | 32768               |
| 16 Spectral Size          | 65536               |

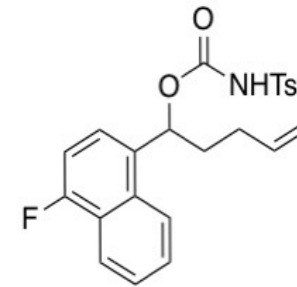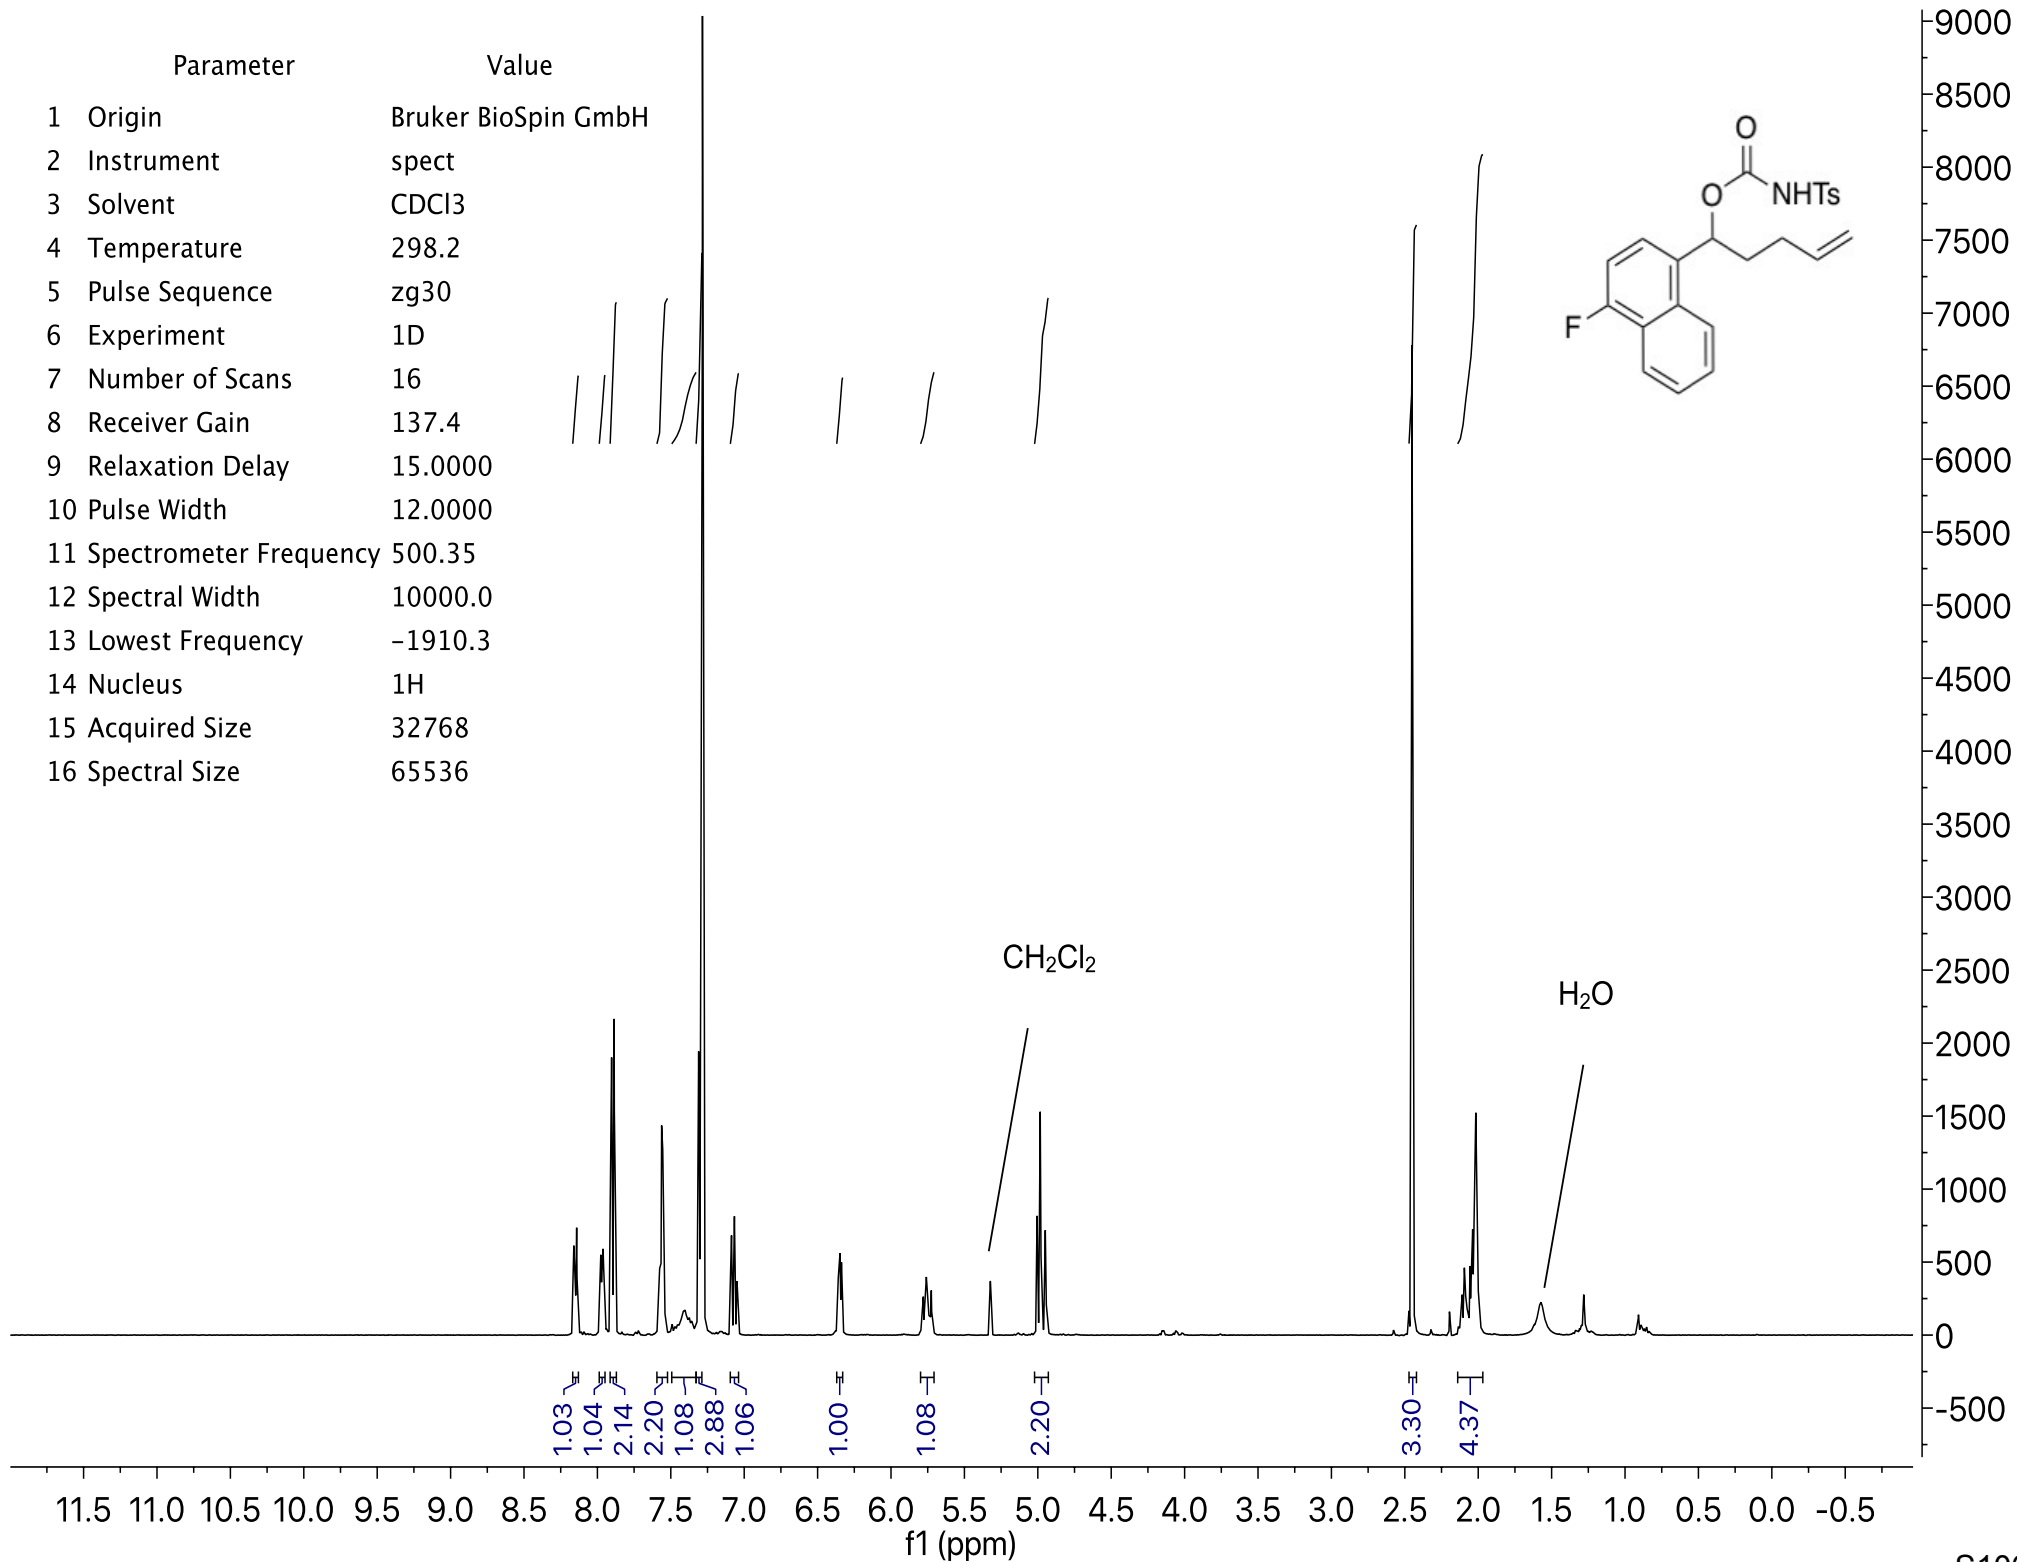

| Parameter                 | Value               |
|---------------------------|---------------------|
| 1 Origin                  | Bruker BioSpin GmbH |
| 2 Instrument              | spect               |
| 3 Solvent                 | CDCl3               |
| 4 Temperature             | 298.1               |
| 5 Pulse Sequence          | zgpg30              |
| 6 Experiment              | 1D                  |
| 7 Number of Scans         | 1080                |
| 8 Receiver Gain           | 190.5               |
| 9 Relaxation Delay        | 1.0000              |
| 10 Pulse Width            | 10.0000             |
| 11 Spectrometer Frequency | 125.83              |
| 12 Spectral Width         | 31512.6             |
| 13 Lowest Frequency       | -1897.7             |
| 14 Nucleus                | <sup>13</sup> C     |
| 15 Acquired Size          | 32768               |
| 16 Spectral Size          | 65536               |

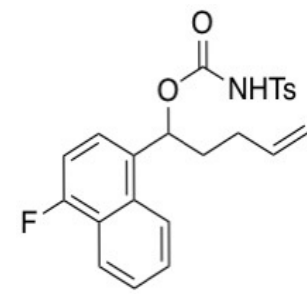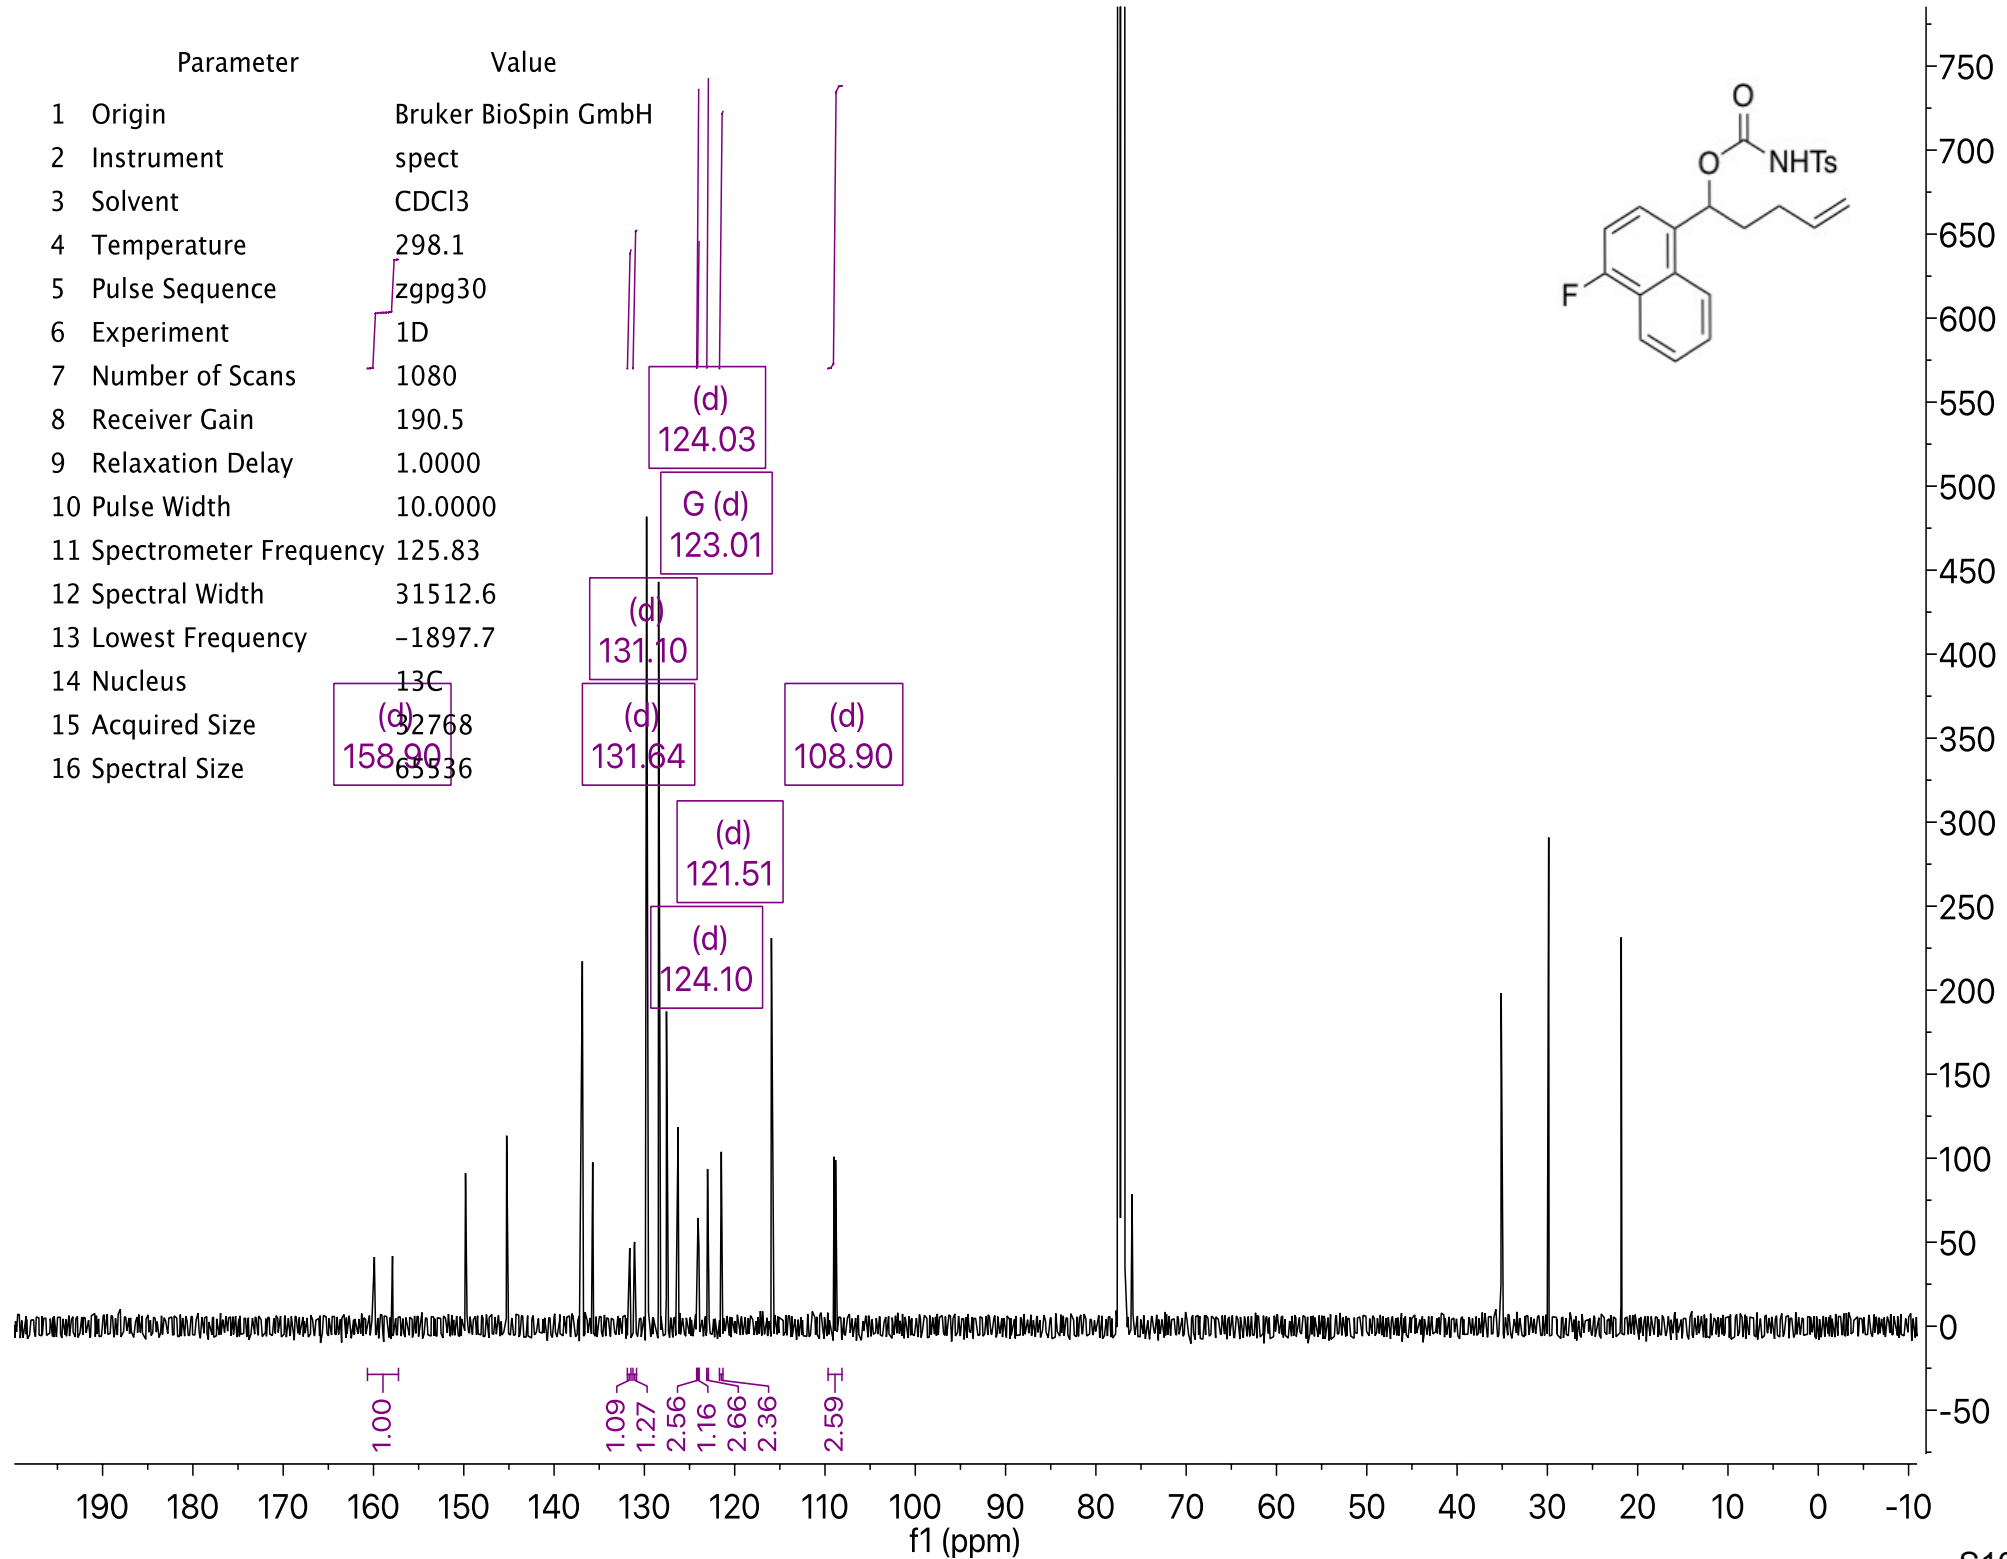

180-140 ppm

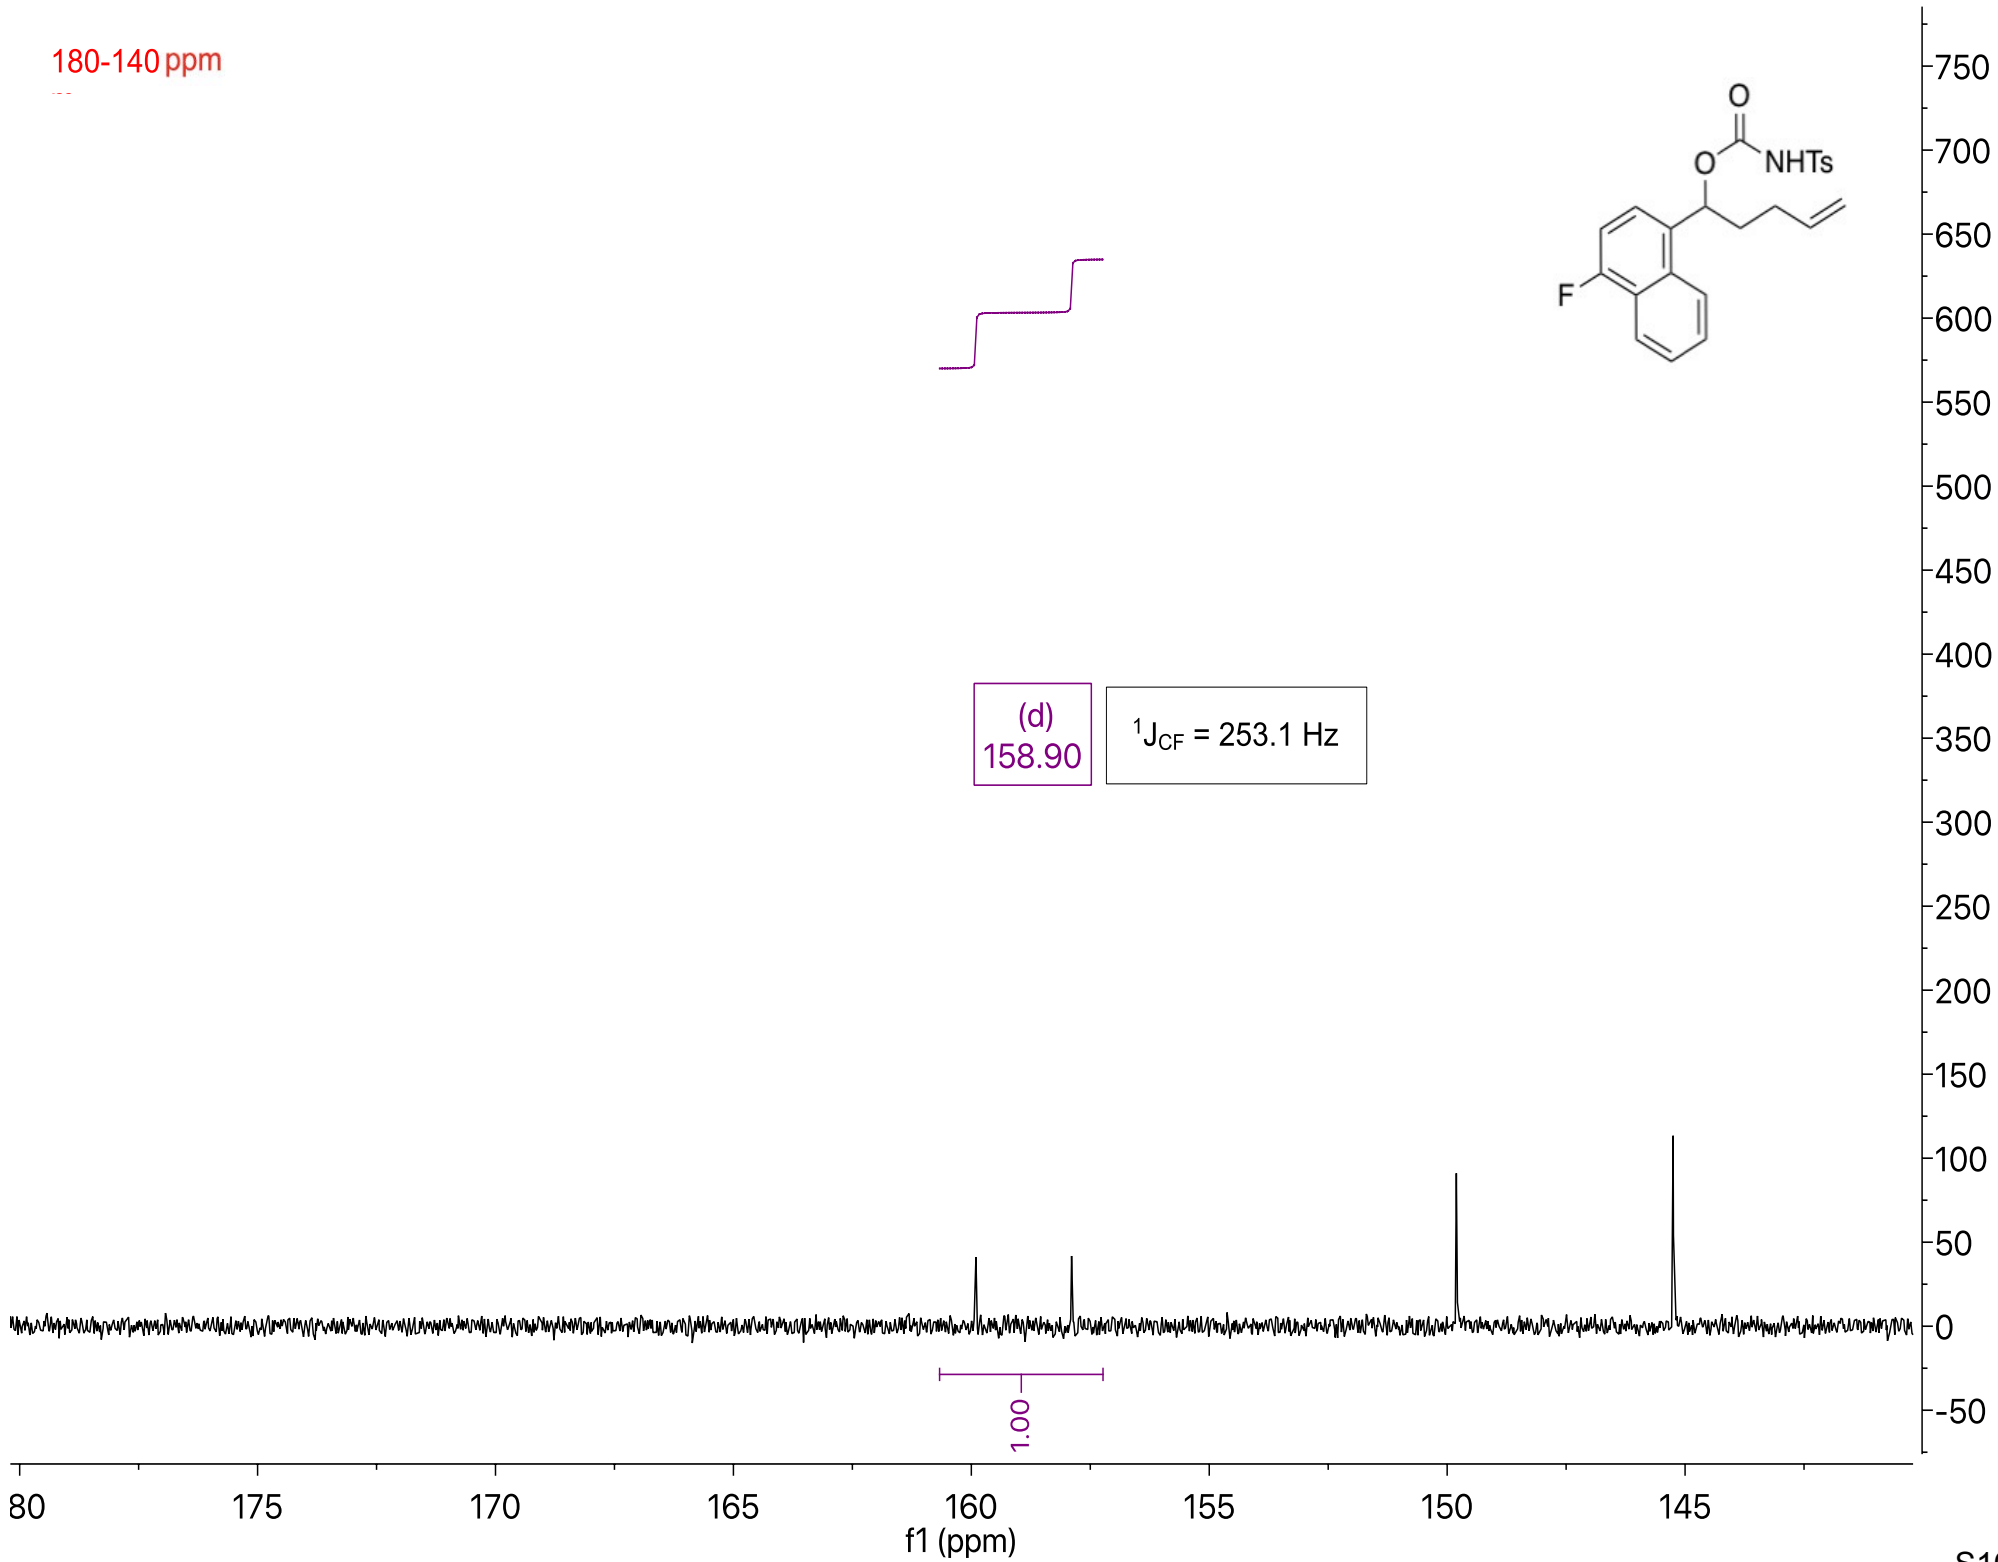

140-100ppm

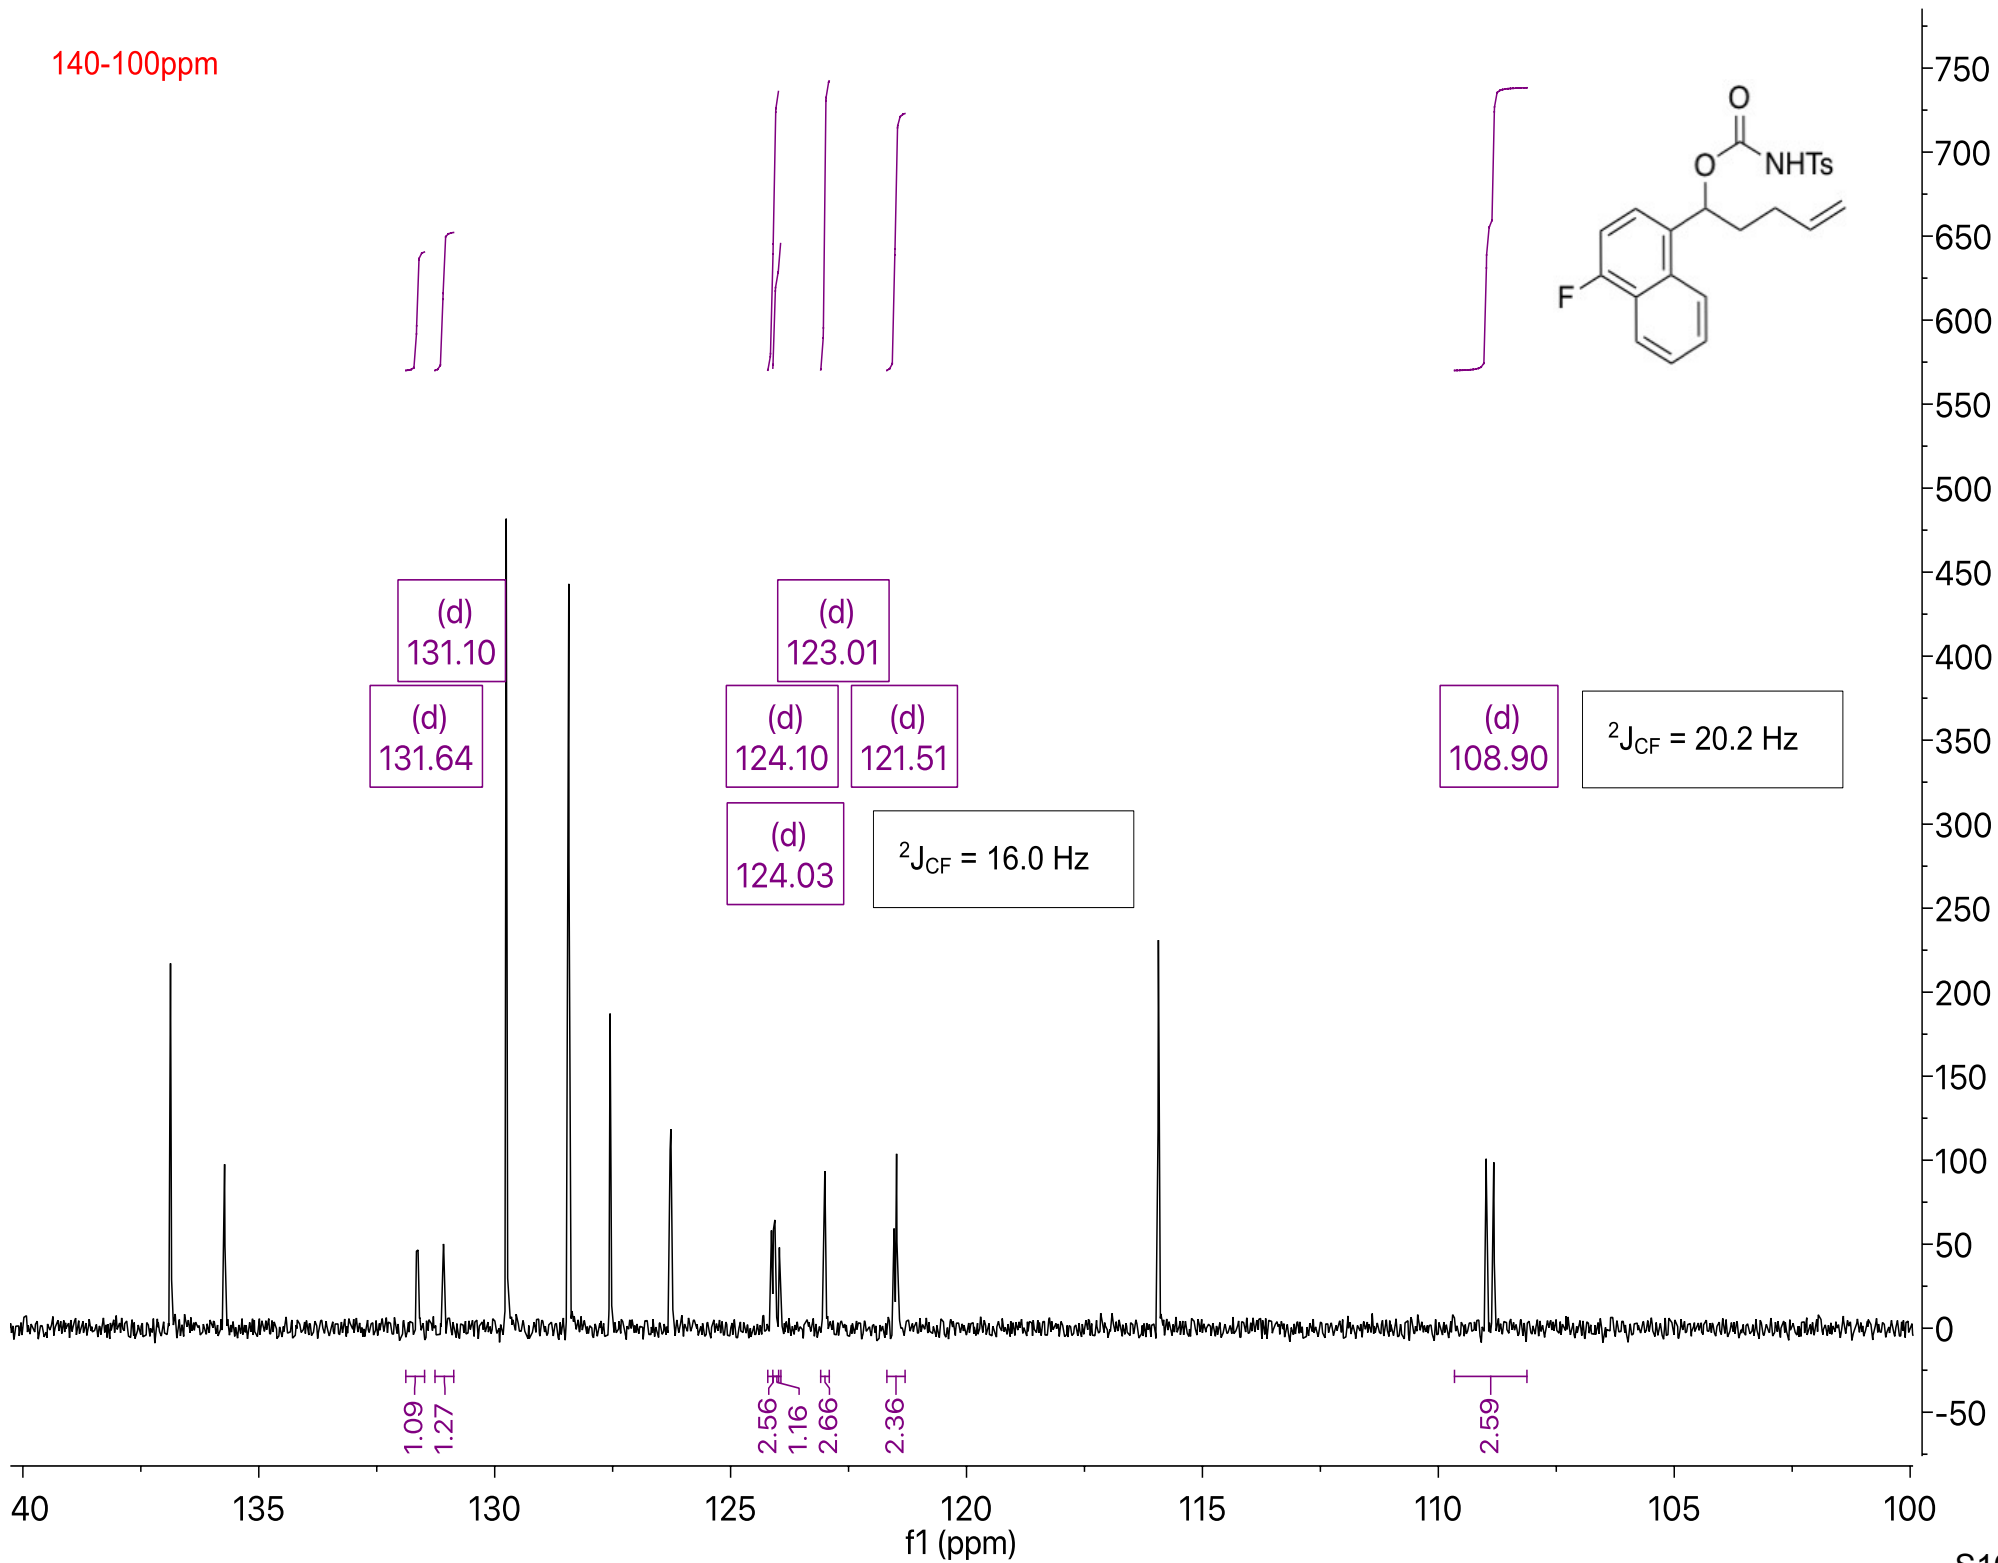

| Parameter                 | Value               |
|---------------------------|---------------------|
| 1 Origin                  | Bruker BioSpin GmbH |
| 2 Instrument              | spect               |
| 3 Solvent                 | CDCl3               |
| 4 Temperature             | 298.2               |
| 5 Pulse Sequence          | zgflqn              |
| 6 Experiment              | 1D                  |
| 7 Number of Scans         | 16                  |
| 8 Receiver Gain           | 190.5               |
| 9 Relaxation Delay        | 1.0000              |
| 10 Pulse Width            | 15.0000             |
| 11 Spectrometer Frequency | 470.75              |
| 12 Spectral Width         | 113636.4            |
| 13 Lowest Frequency       | -103898.1           |
| 14 Nucleus                | 19F                 |
| 15 Acquired Size          | 65536               |
| 16 Spectral Size          | 131072              |

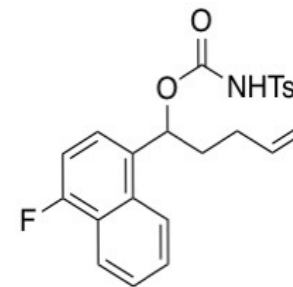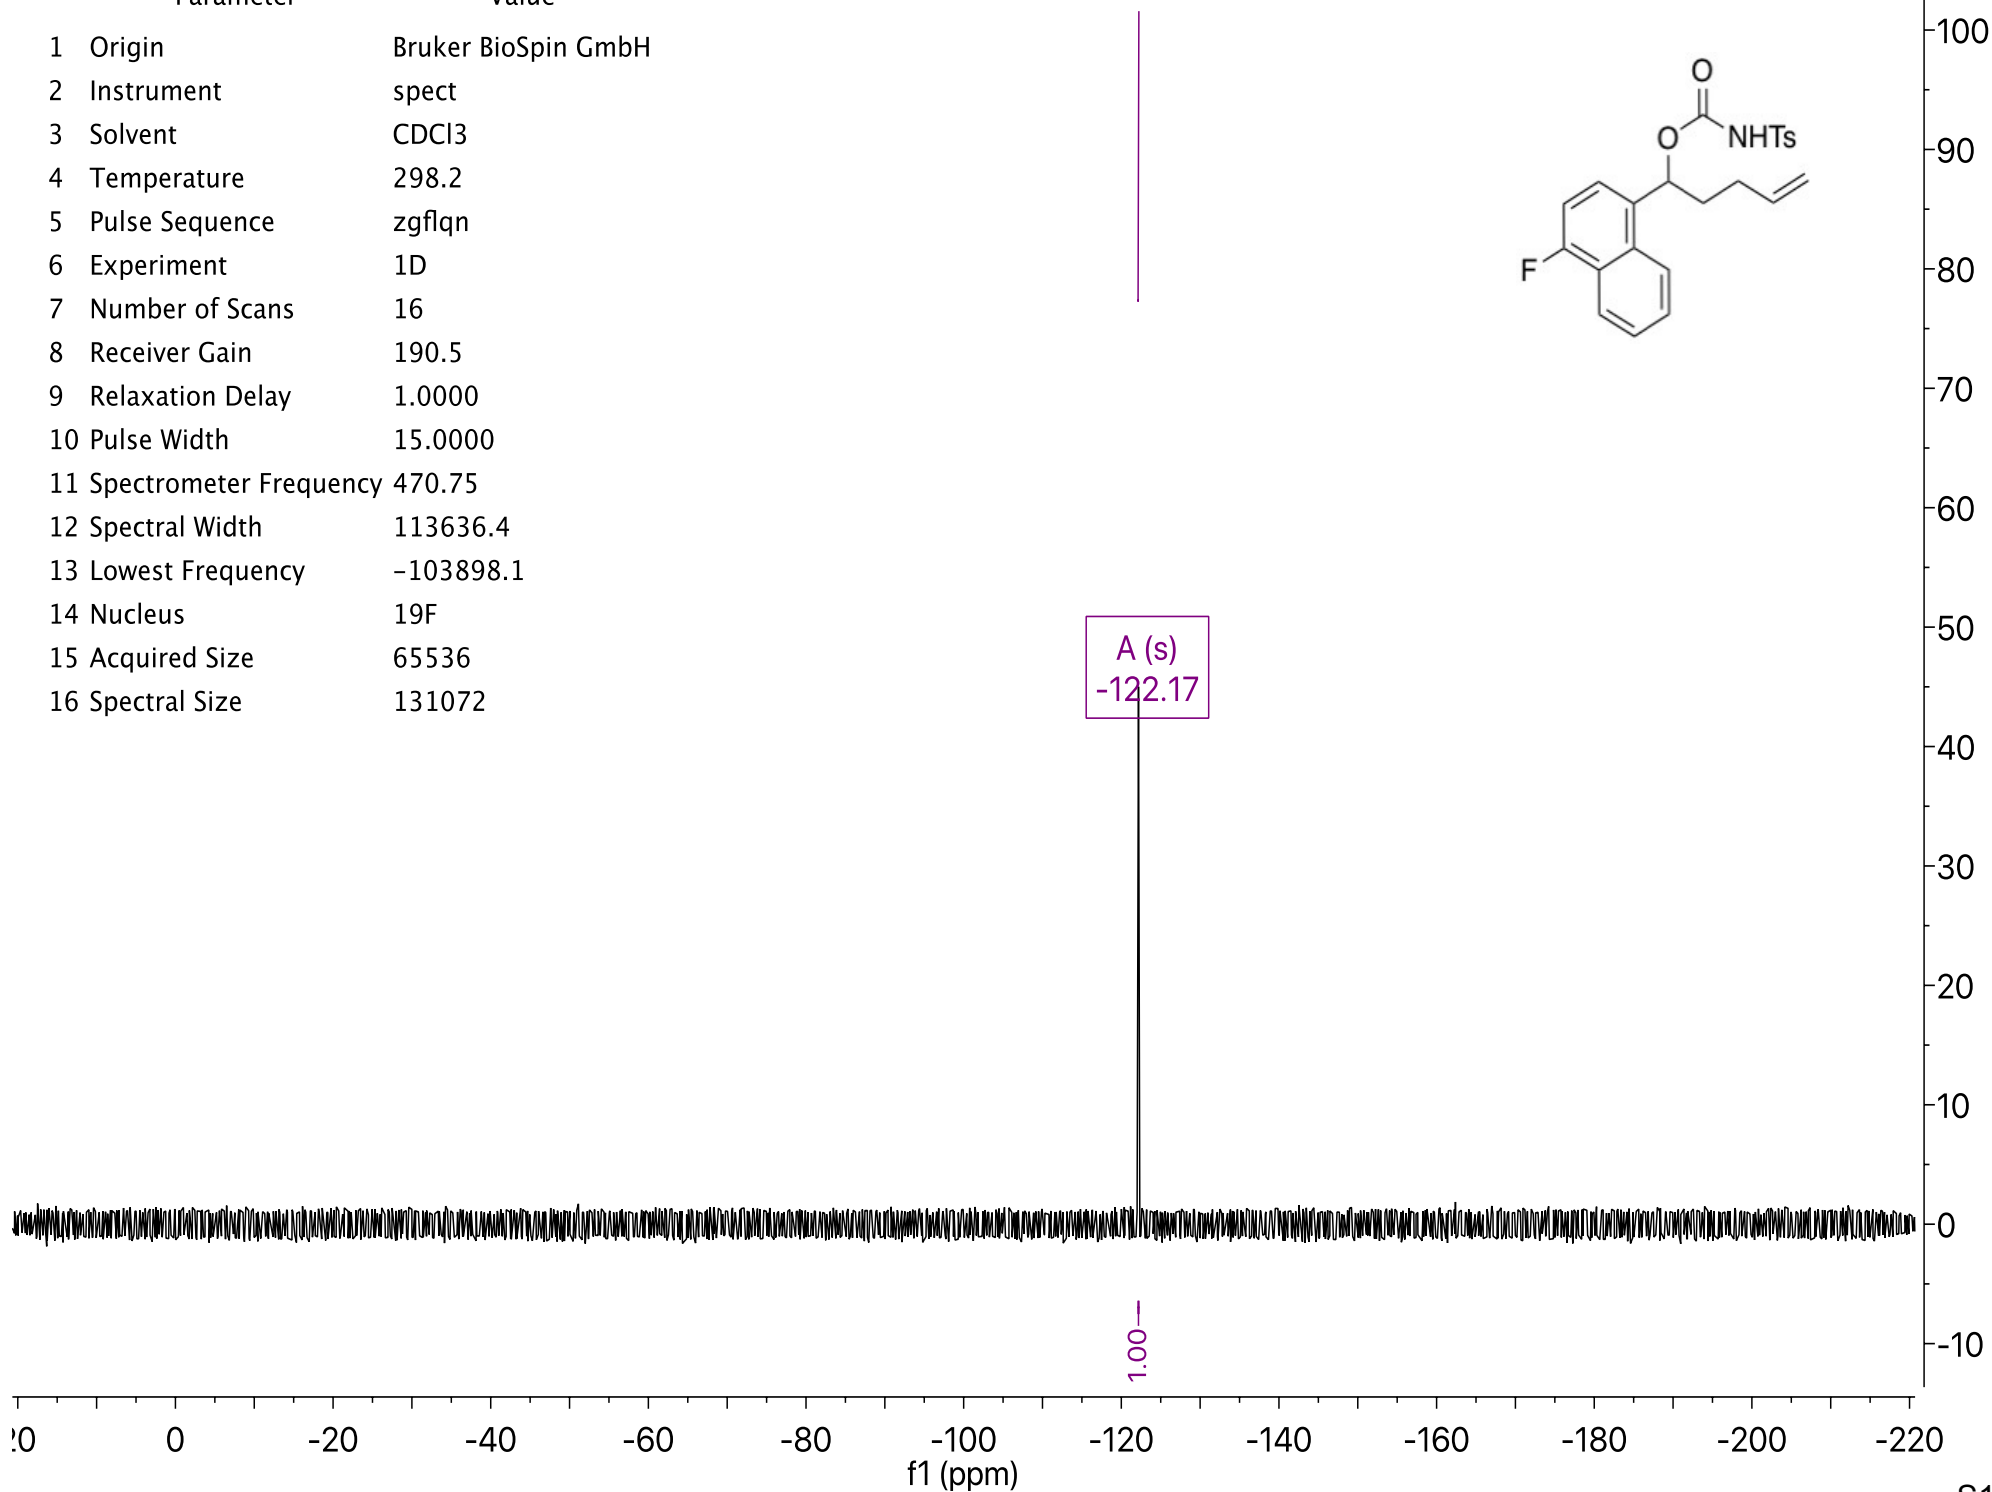



| Parameter                 | Value               |
|---------------------------|---------------------|
| 1 Origin                  | Bruker BioSpin GmbH |
| 2 Instrument              | spect               |
| 3 Solvent                 | CDCl3               |
| 4 Temperature             | 289.1               |
| 5 Pulse Sequence          | zg30                |
| 6 Experiment              | 1D                  |
| 7 Number of Scans         | 16                  |
| 8 Receiver Gain           | 190.5               |
| 9 Relaxation Delay        | 15.0000             |
| 10 Pulse Width            | 12.0000             |
| 11 Spectrometer Frequency | 500.35              |
| 12 Spectral Width         | 10000.0             |
| 13 Lowest Frequency       | -1921.3             |
| 14 Nucleus                | 1H                  |
| 15 Acquired Size          | 32768               |
| 16 Spectral Size          | 65536               |

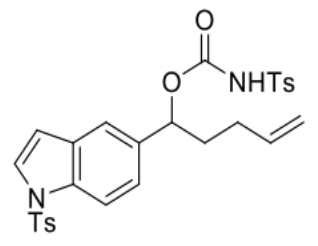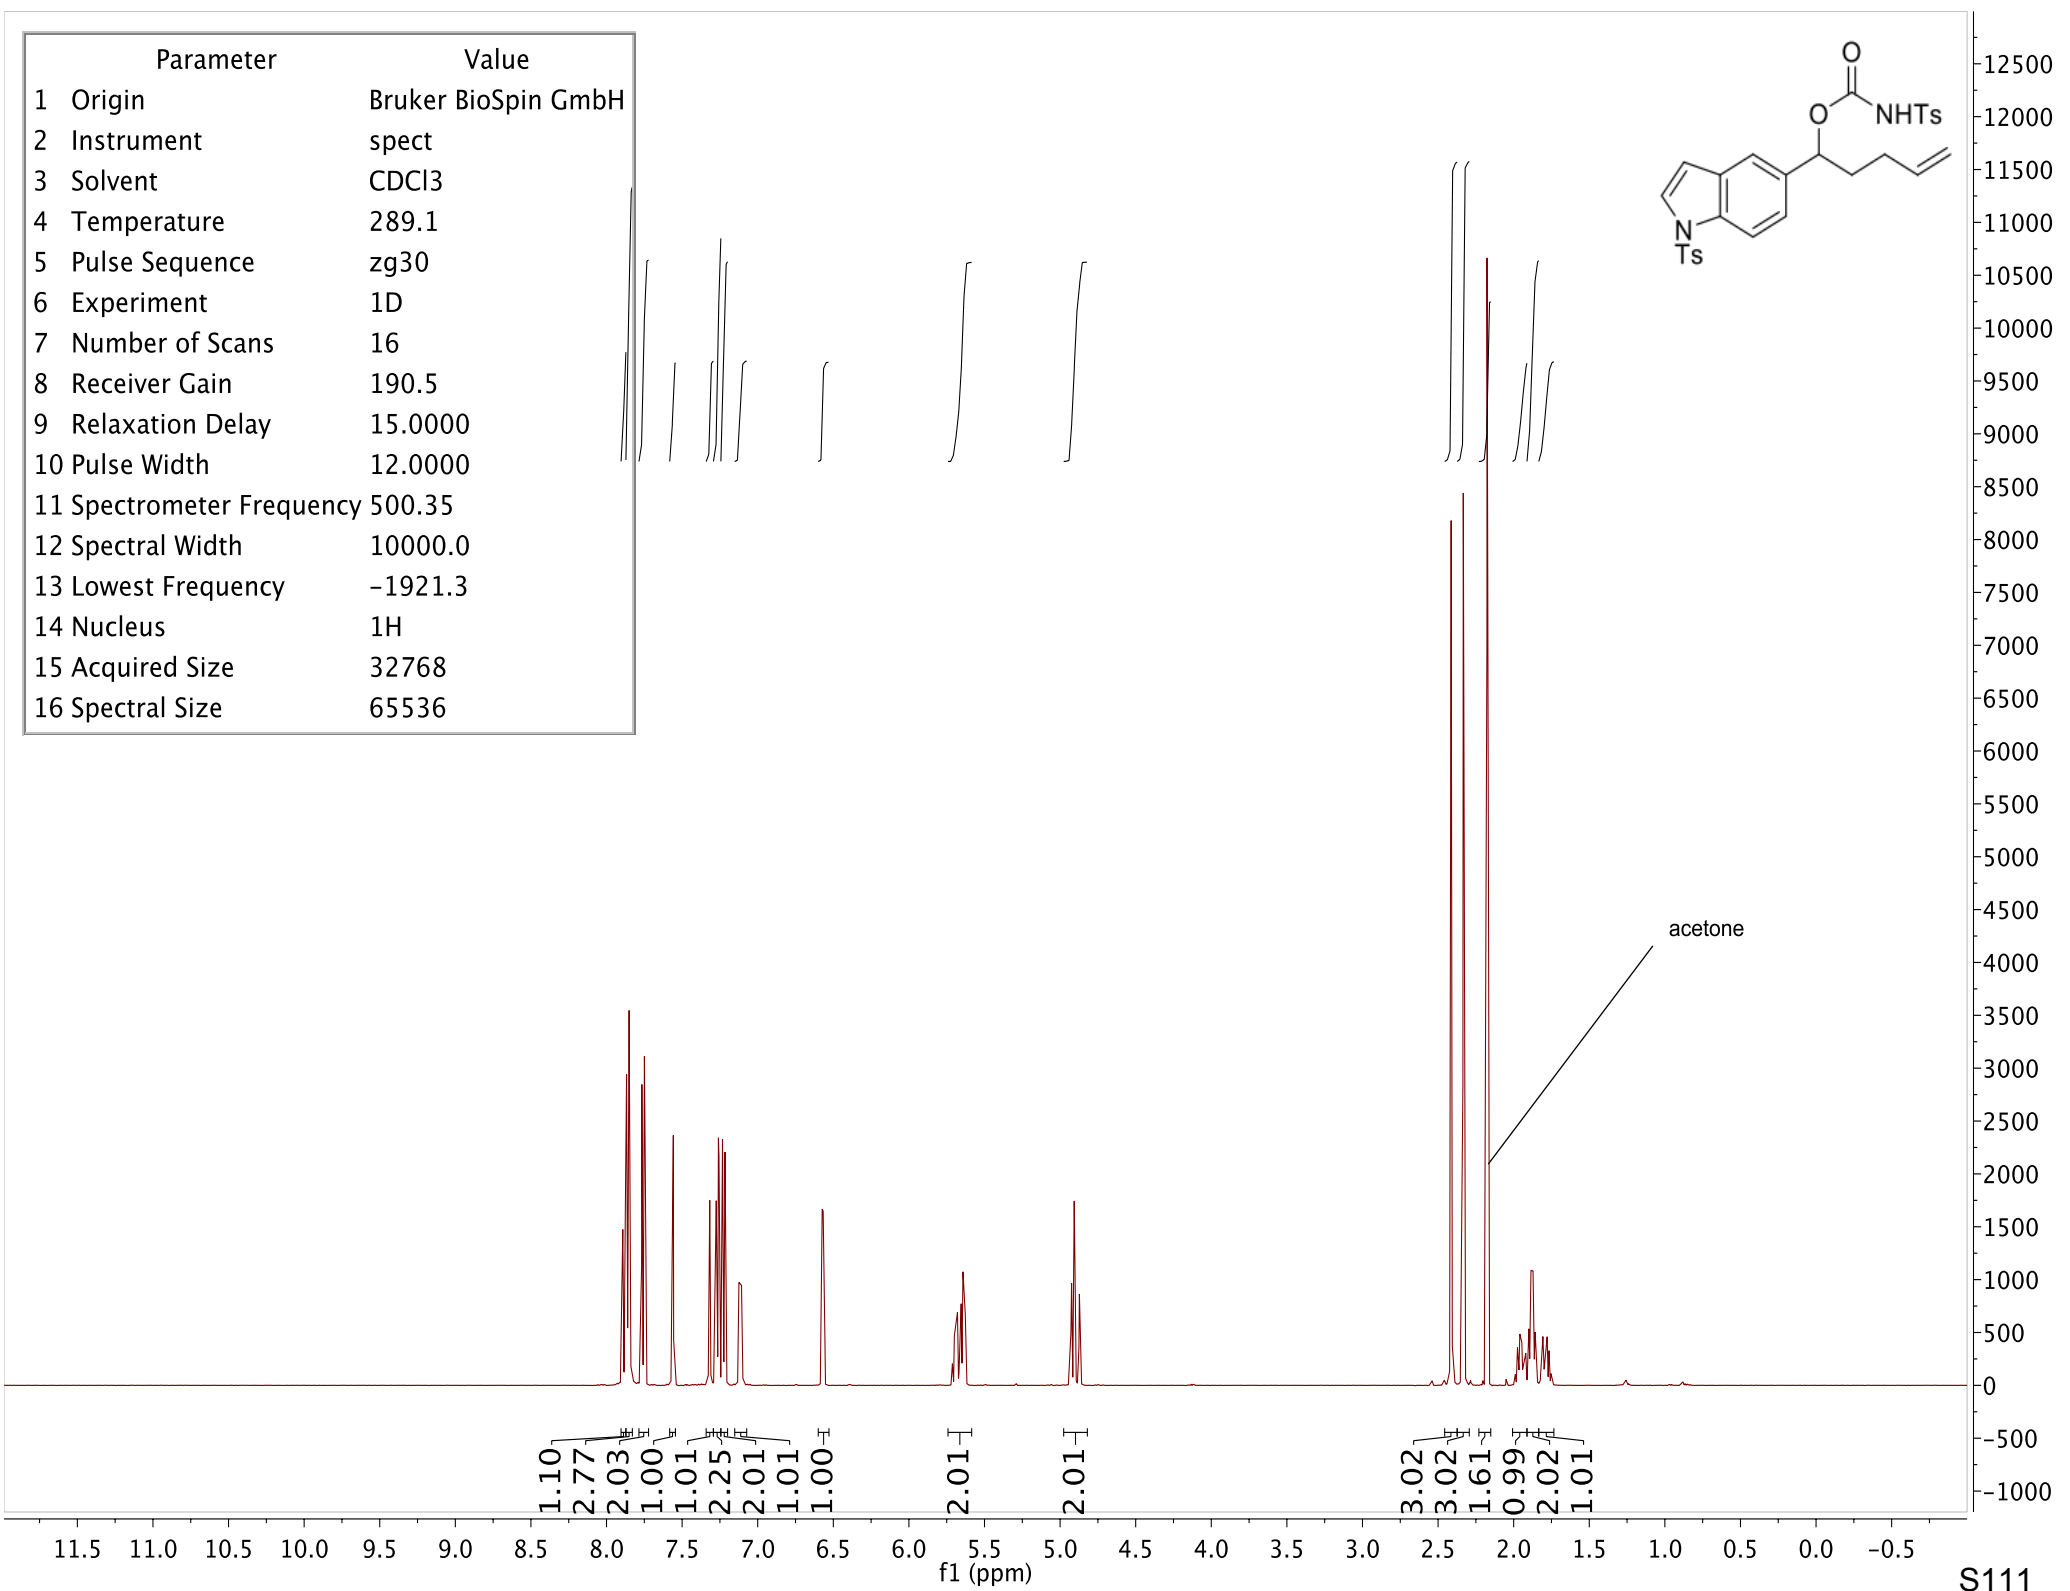

| Parameter                 | Value               |
|---------------------------|---------------------|
| 1 Origin                  | Bruker BioSpin GmbH |
| 2 Instrument              | spect               |
| 3 Solvent                 | CDCl3               |
| 4 Temperature             | 289.1               |
| 5 Pulse Sequence          | zgpg30              |
| 6 Experiment              | 1D                  |
| 7 Number of Scans         | 256                 |
| 8 Receiver Gain           | 190.5               |
| 9 Relaxation Delay        | 2.0000              |
| 10 Pulse Width            | 10.0000             |
| 11 Spectrometer Frequency | 125.83              |
| 12 Spectral Width         | 31512.6             |
| 13 Lowest Frequency       | -1908.2             |
| 14 Nucleus                | 13C                 |
| 15 Acquired Size          | 32768               |
| 16 Spectral Size          | 65536               |

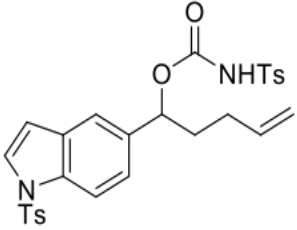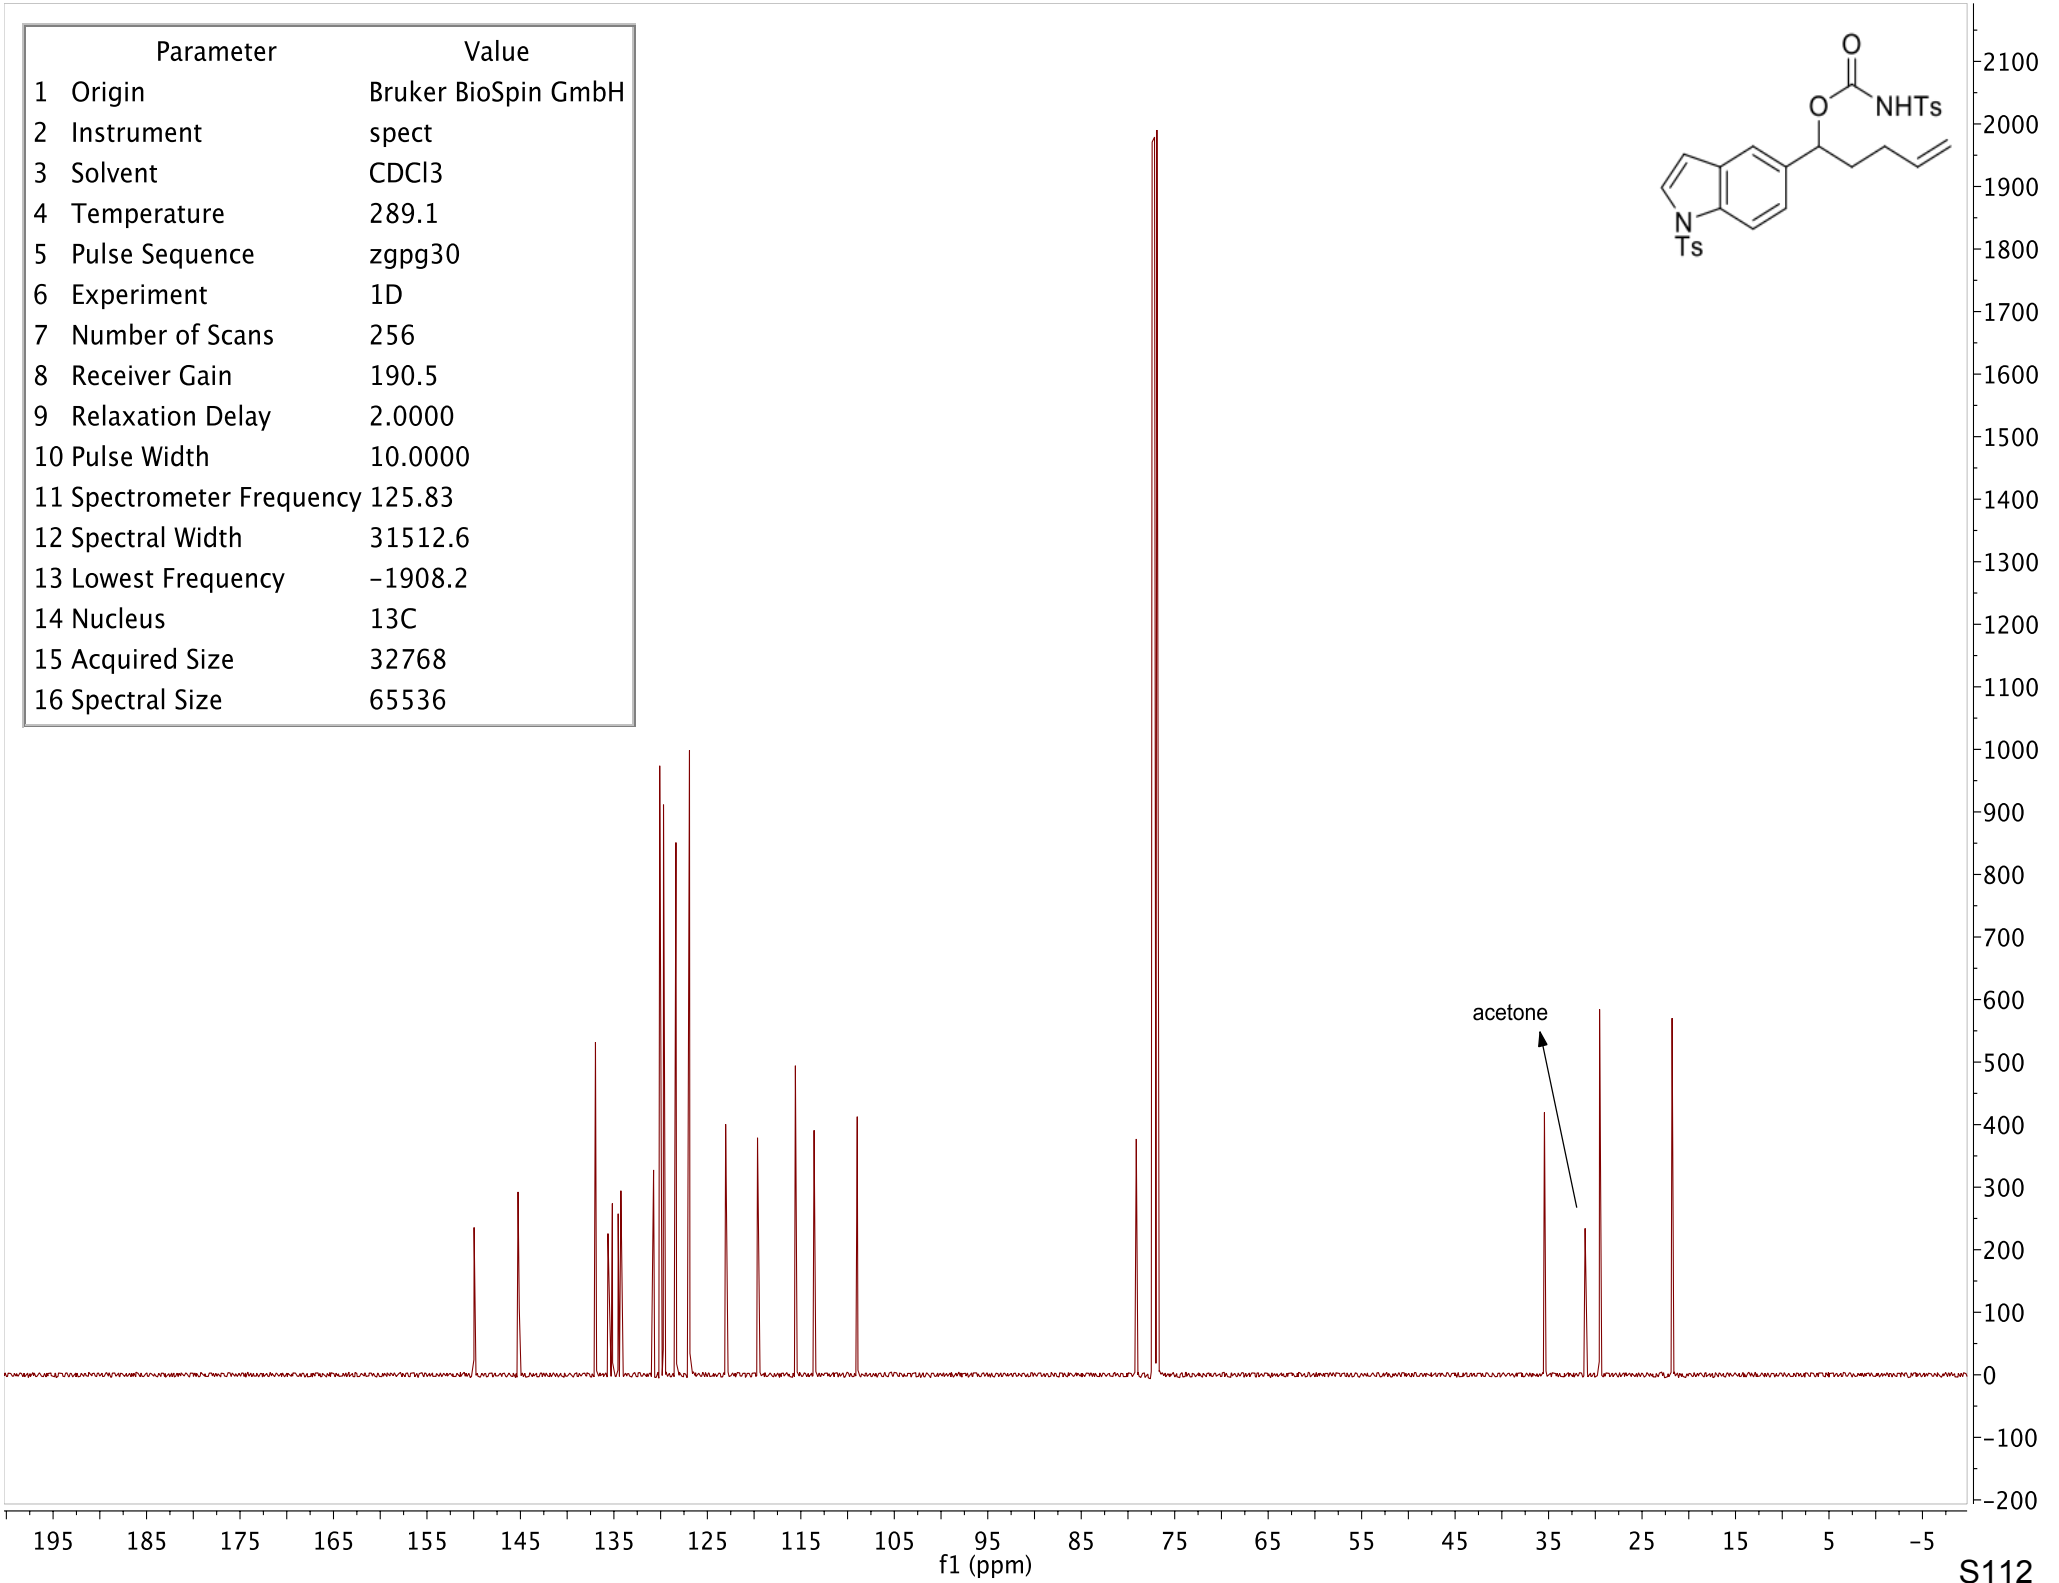

155-125pp

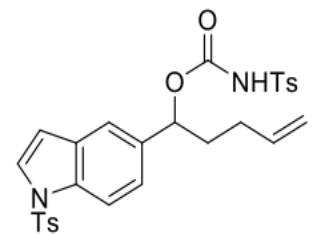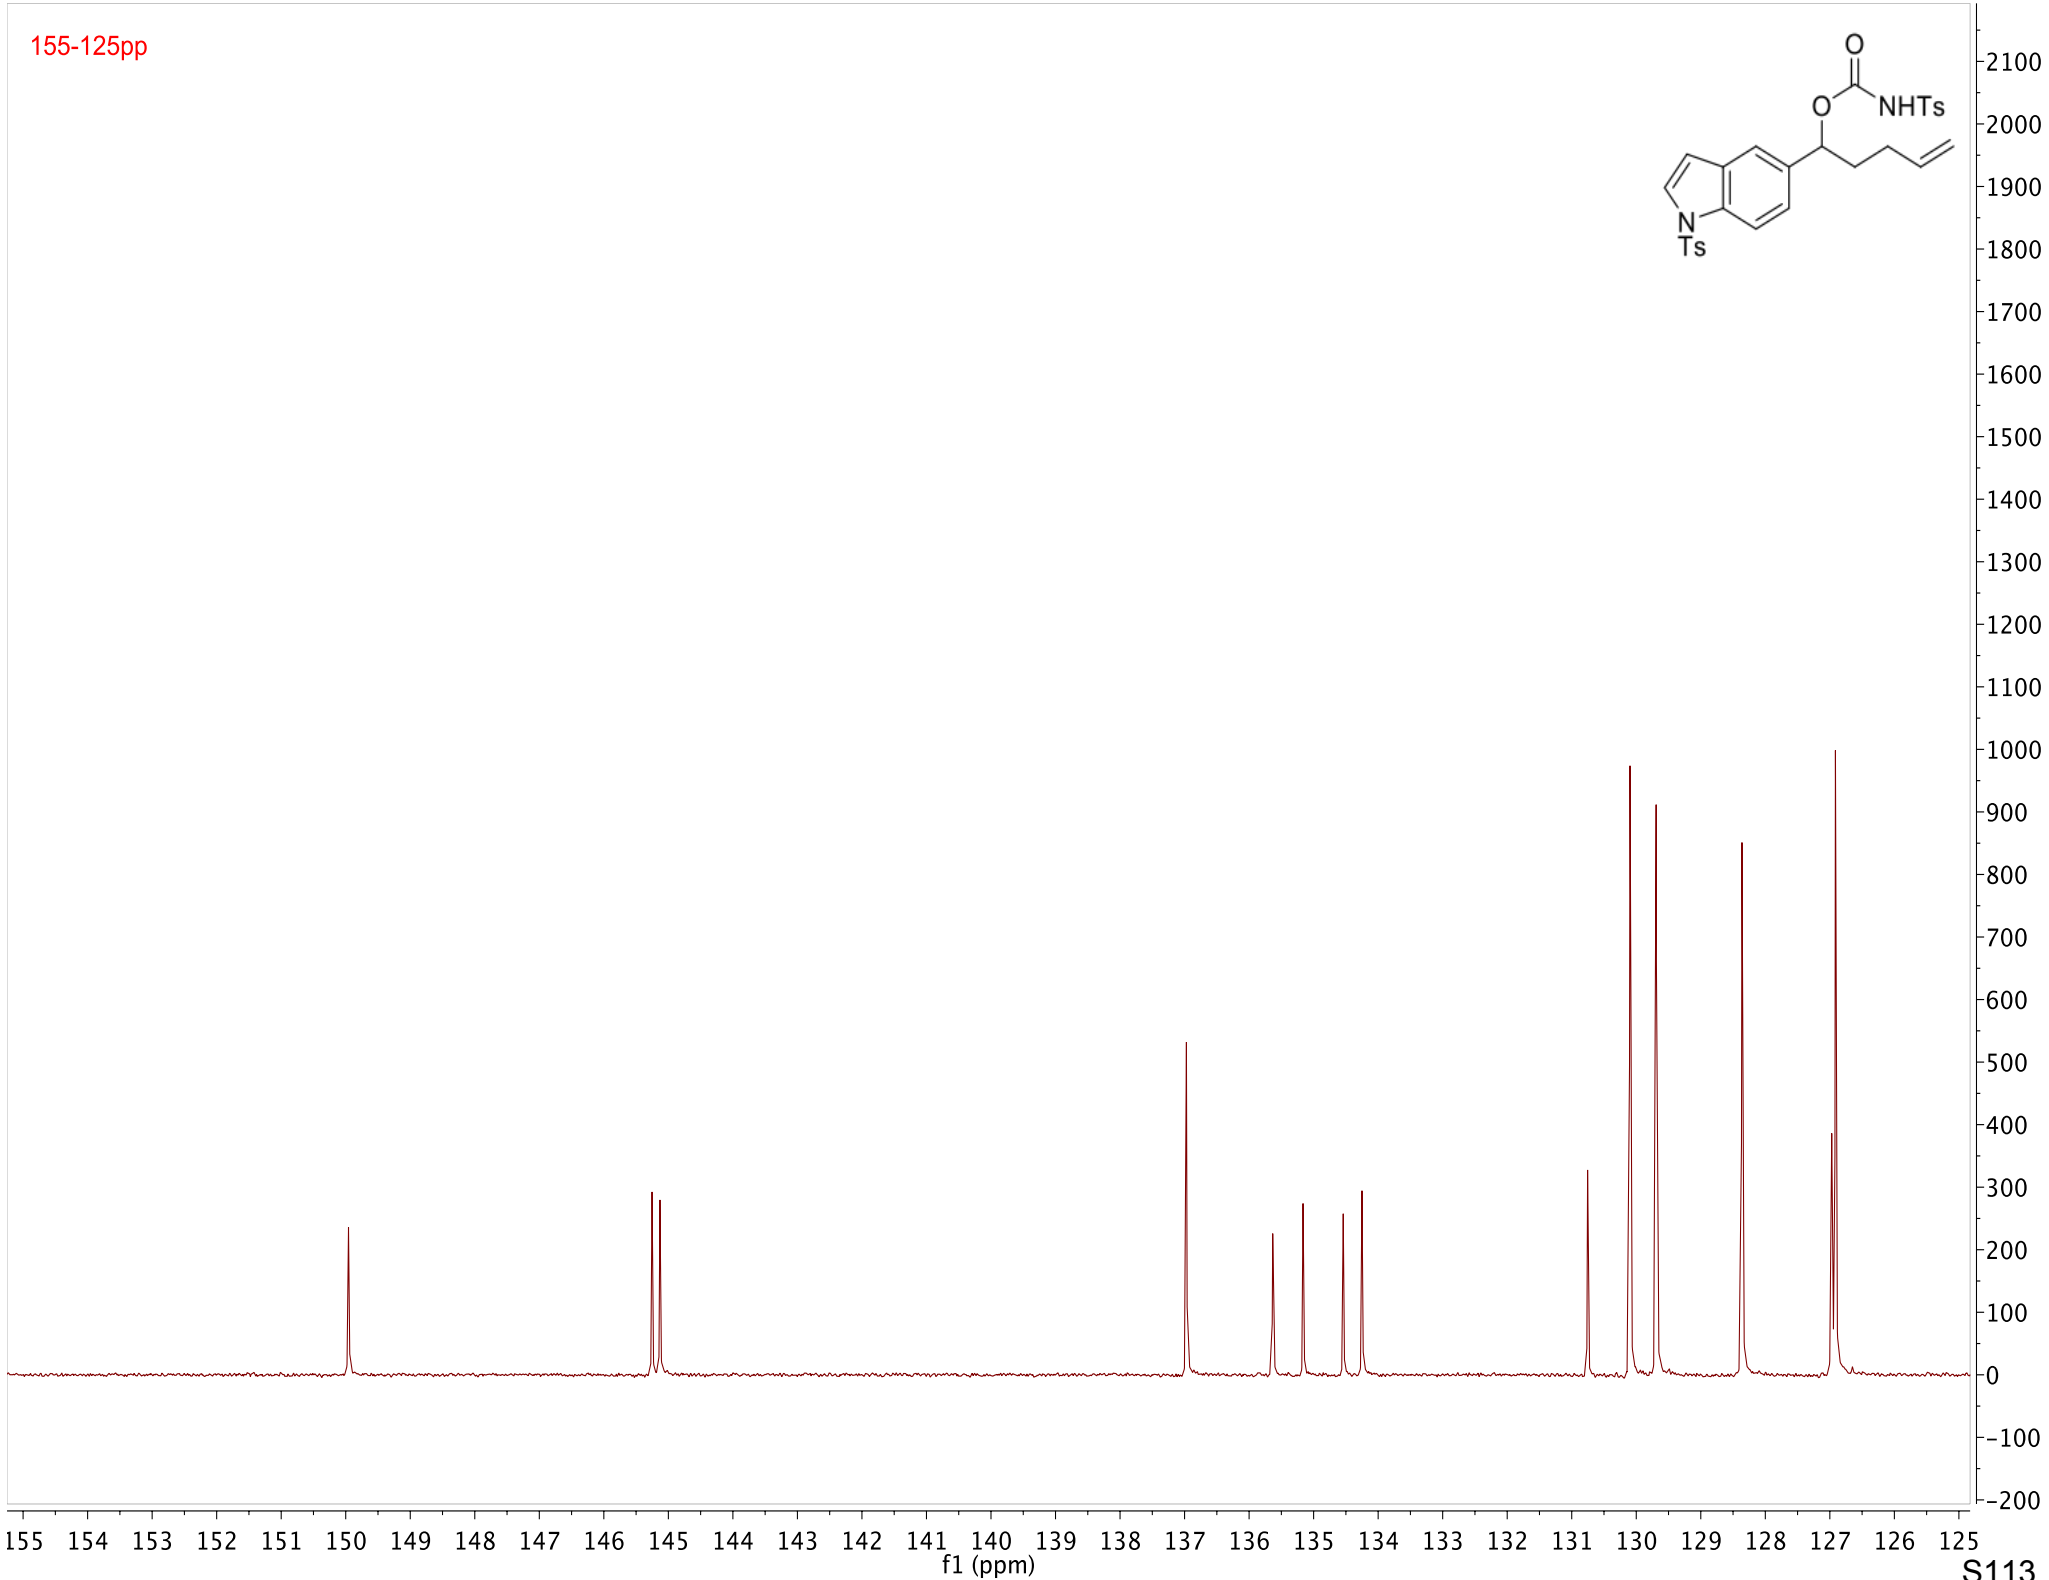

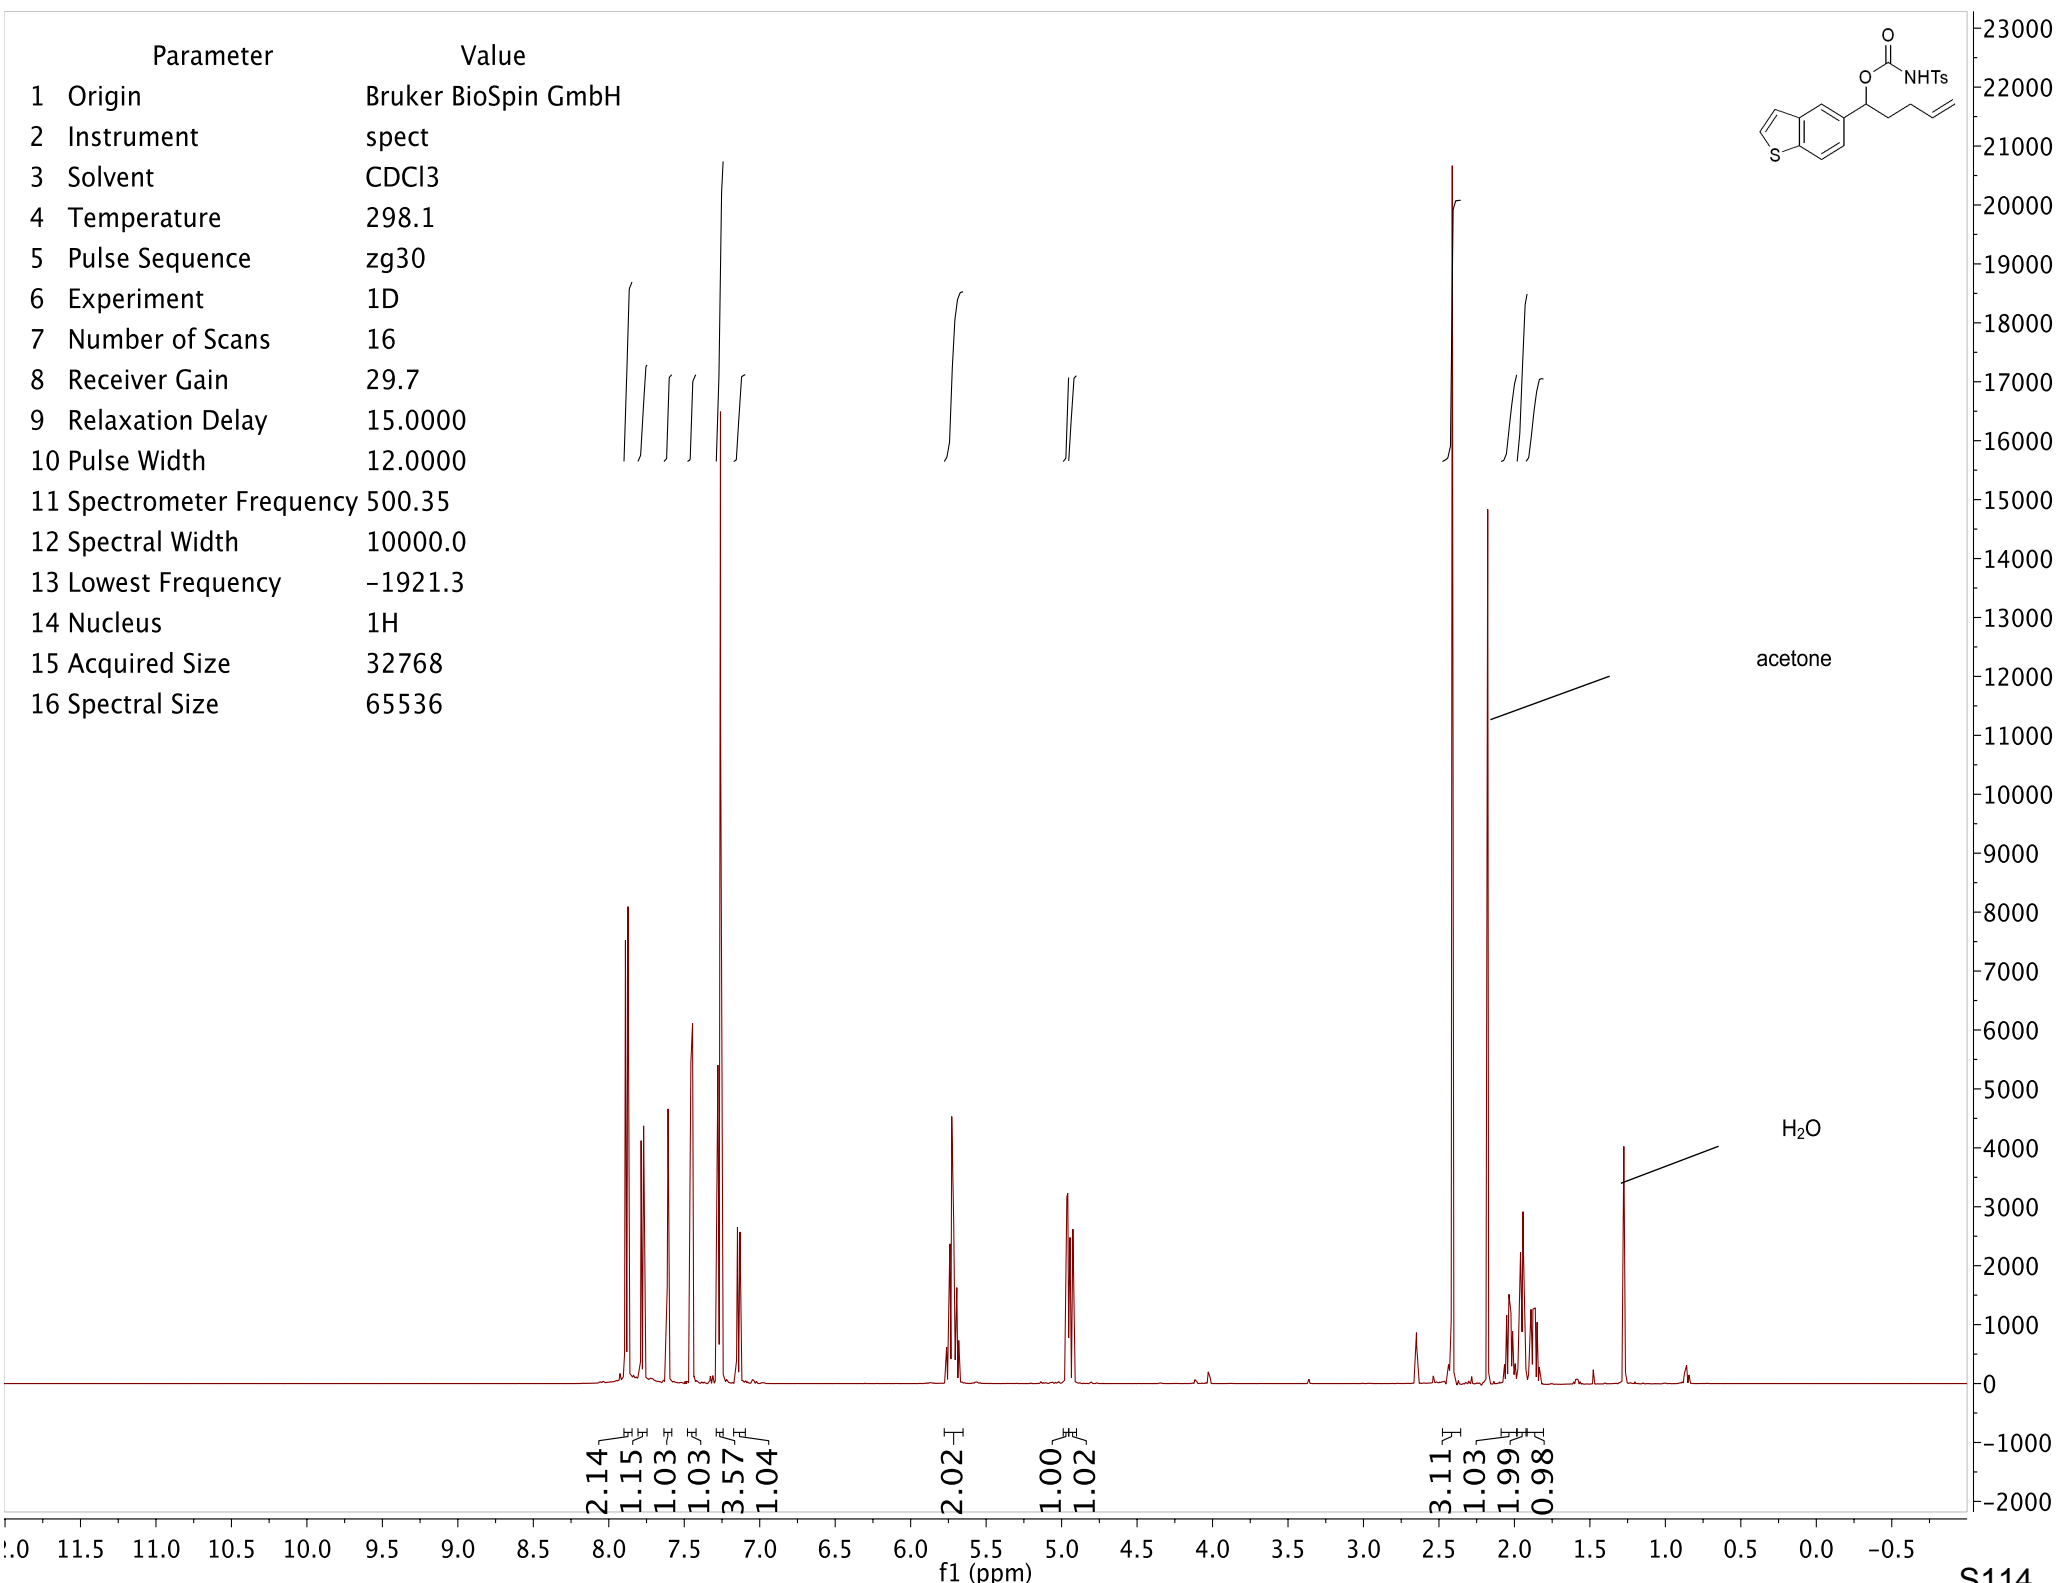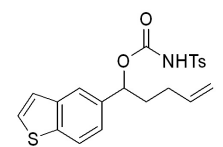

| Parameter                 | Value               |
|---------------------------|---------------------|
| 1 Origin                  | Bruker BioSpin GmbH |
| 2 Instrument              | spect               |
| 3 Solvent                 | CDCl3               |
| 4 Temperature             | 298.2               |
| 5 Pulse Sequence          | zgpg30              |
| 6 Experiment              | 1D                  |
| 7 Number of Scans         | 256                 |
| 8 Receiver Gain           | 190.5               |
| 9 Relaxation Delay        | 2.0000              |
| 10 Pulse Width            | 10.0000             |
| 11 Spectrometer Frequency | 125.83              |
| 12 Spectral Width         | 31512.6             |
| 13 Lowest Frequency       | -1904.0             |
| 14 Nucleus                | 13C                 |
| 15 Acquired Size          | 32768               |
| 16 Spectral Size          | 65536               |

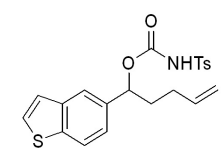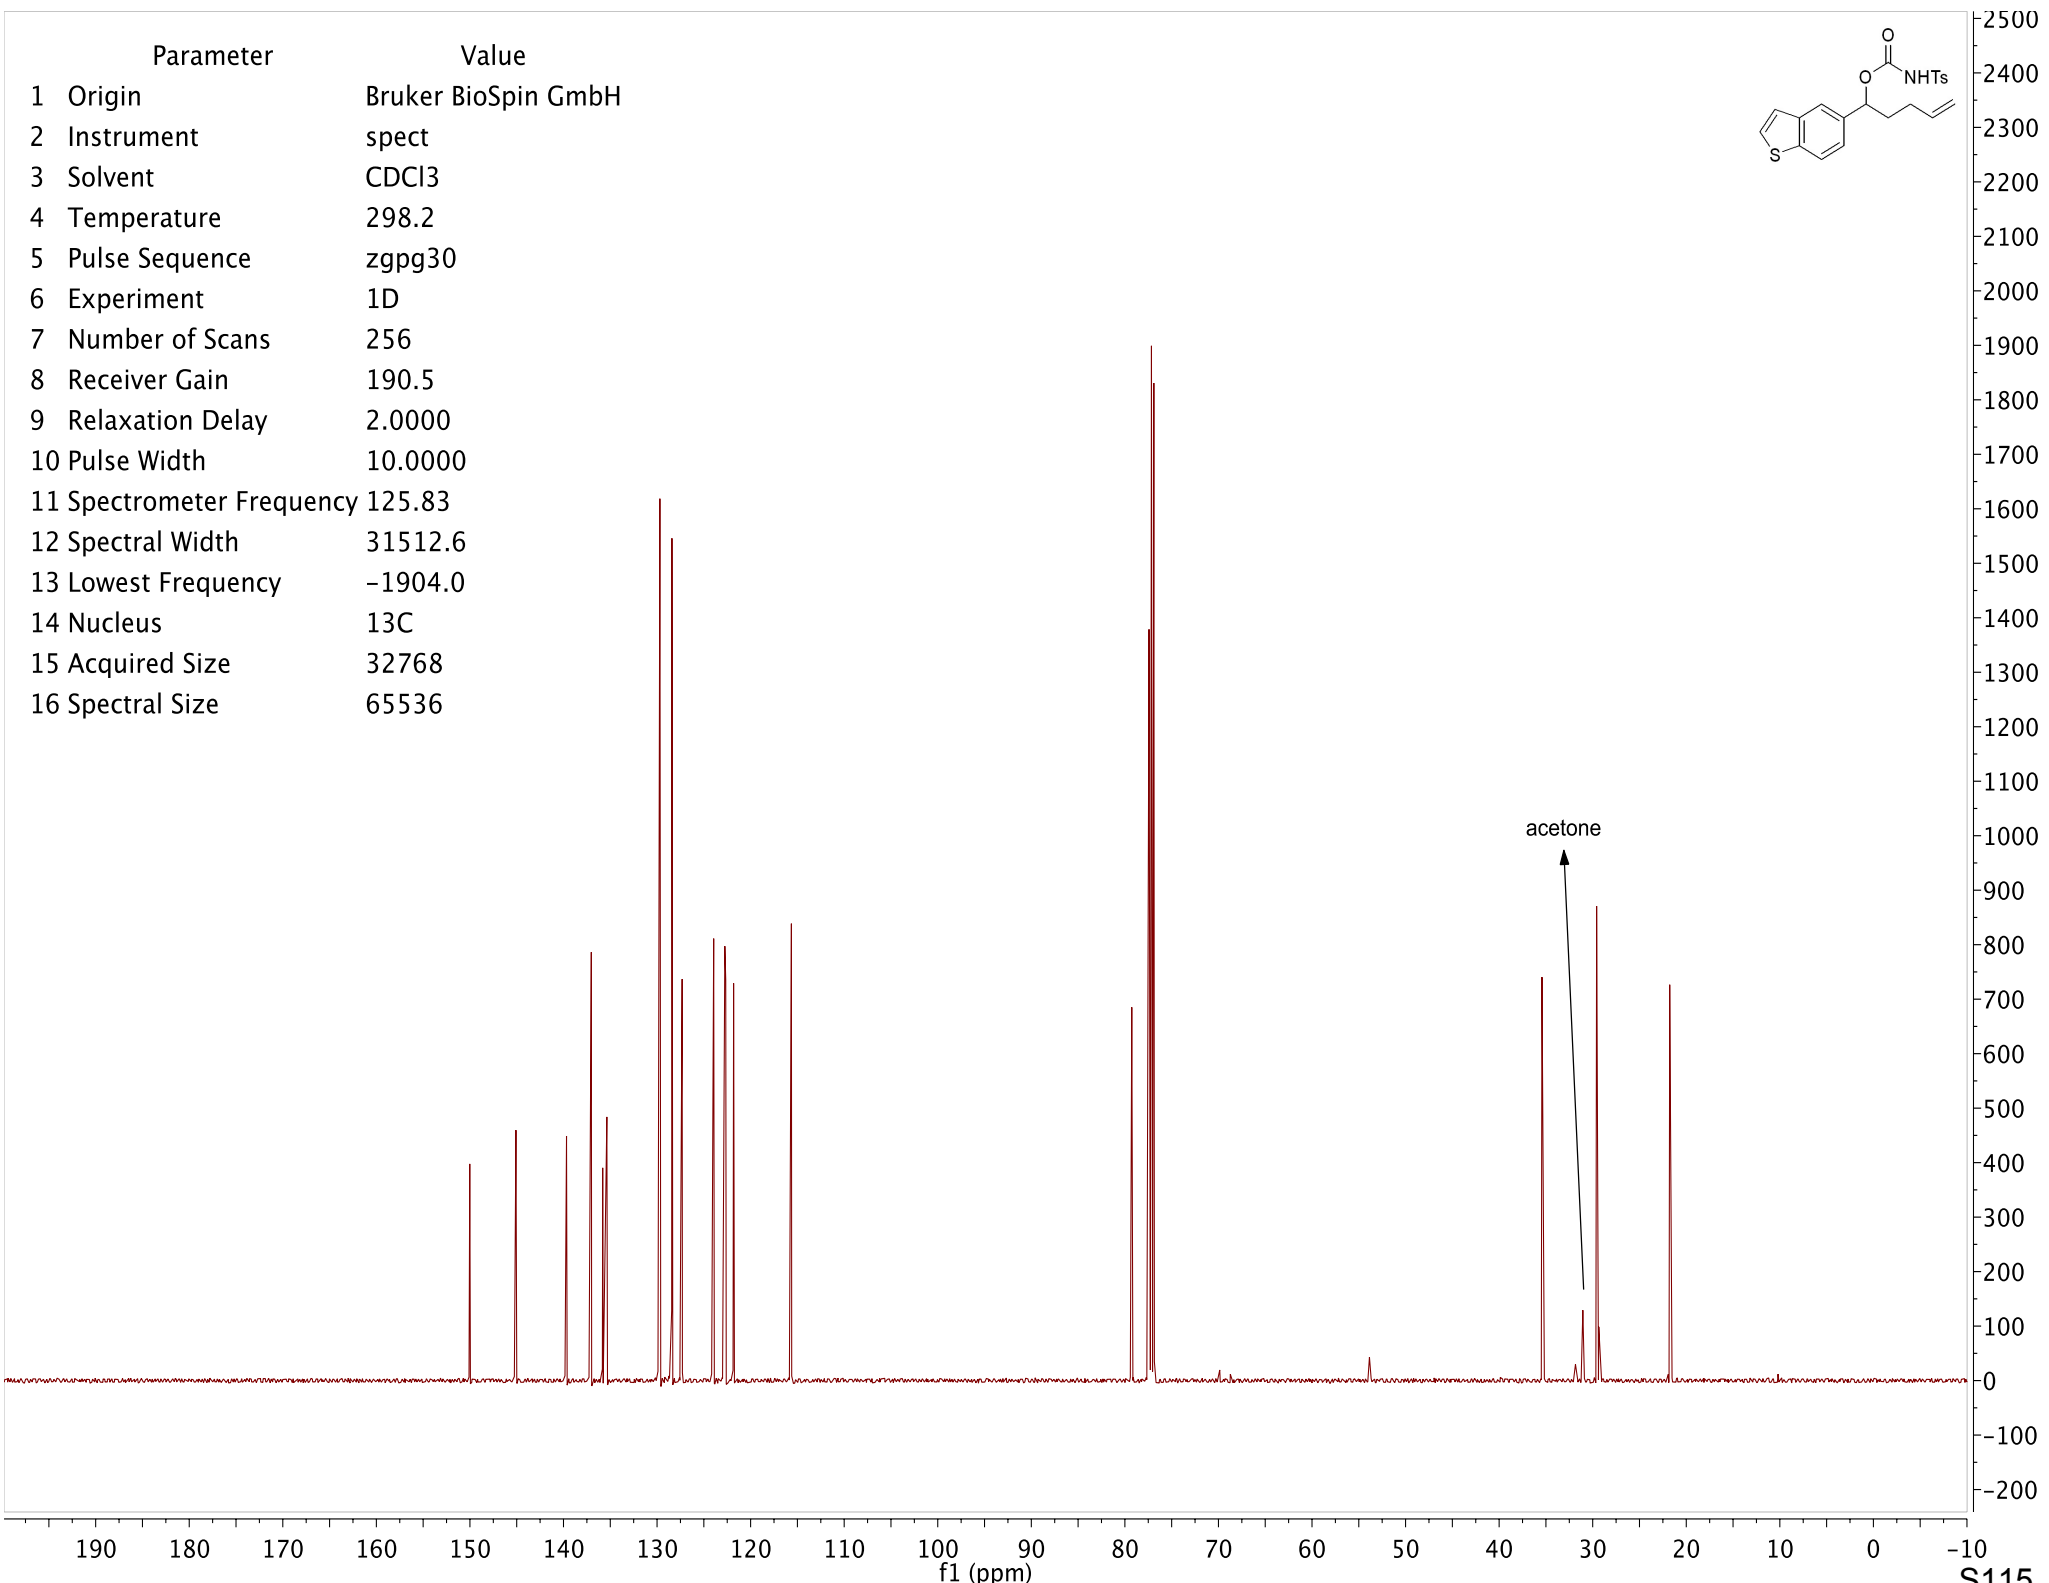

| Parameter                 | Value   |
|---------------------------|---------|
| 1 Origin                  | Varian  |
| 2 Instrument              | inova   |
| 3 Solvent                 | CDCl3   |
| 4 Temperature             | 20.0    |
| 5 Pulse Sequence          | s2pul   |
| 6 Experiment              | 1D      |
| 7 Number of Scans         | 8       |
| 8 Receiver Gain           | 60      |
| 9 Relaxation Delay        | 15.0000 |
| 10 Pulse Width            | 5.5000  |
| 11 Spectrometer Frequency | 499.43  |
| 12 Spectral Width         | 8000.0  |
| 13 Lowest Frequency       | -1518.7 |
| 14 Nucleus                | 1H      |
| 15 Acquired Size          | 32768   |
| 16 Spectral Size          | 65536   |

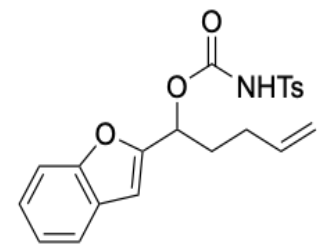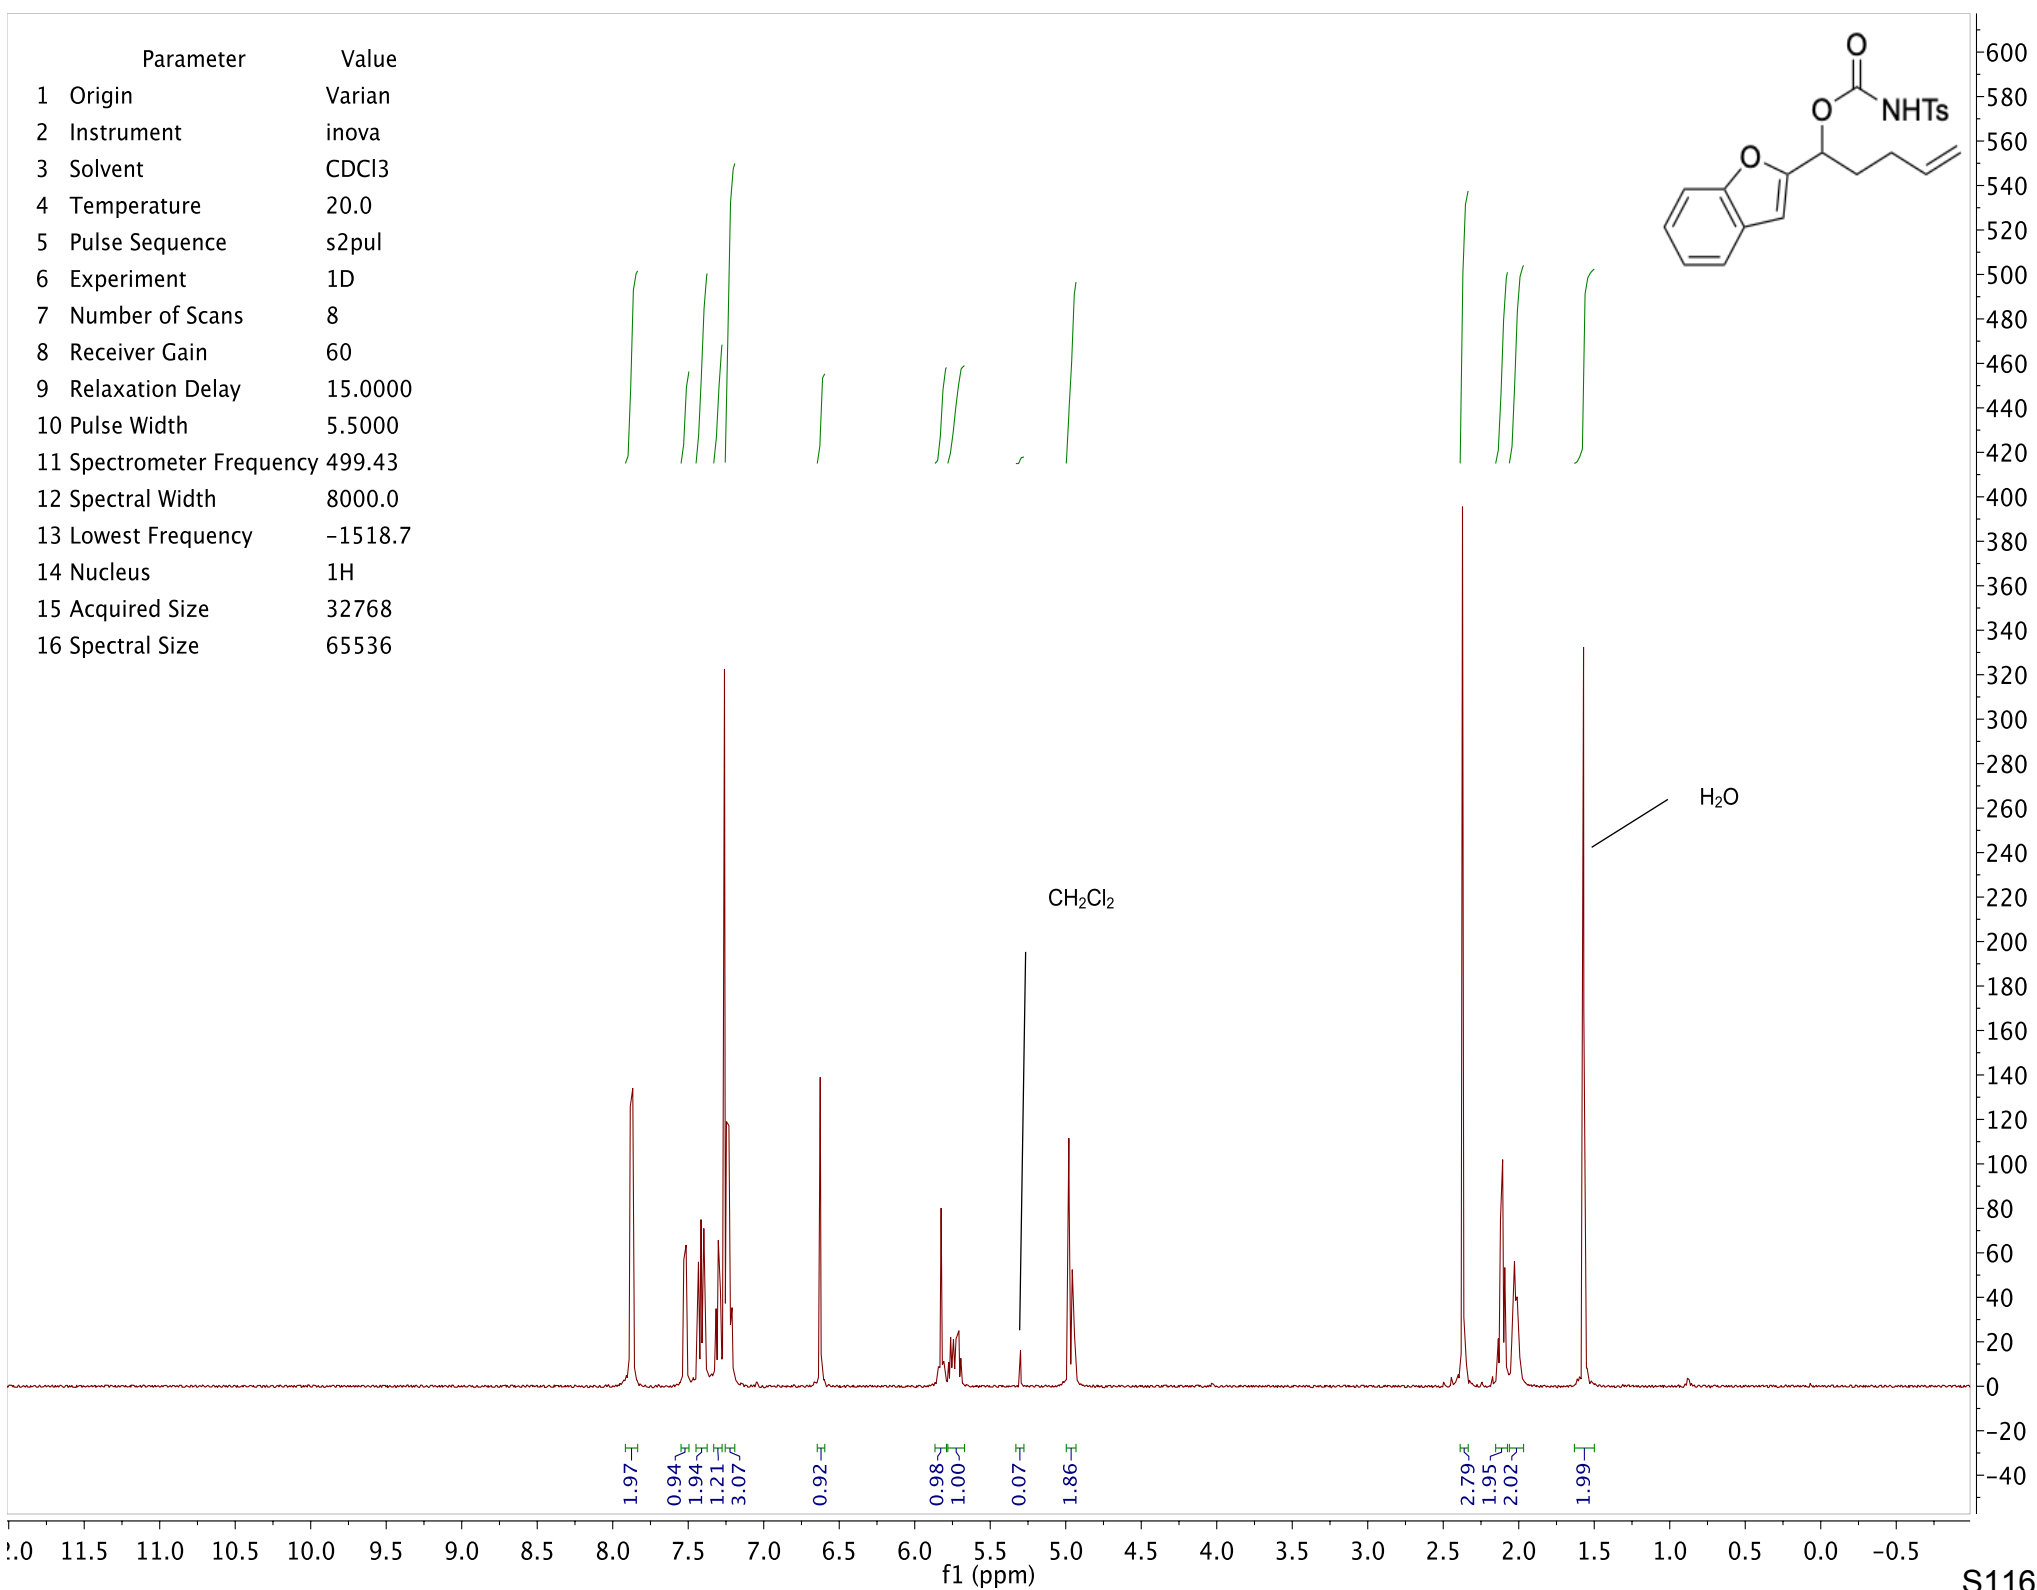

| Parameter                 | Value               |
|---------------------------|---------------------|
| 1 Origin                  | Bruker BioSpin GmbH |
| 2 Instrument              | spect               |
| 3 Solvent                 | CDCl3               |
| 4 Temperature             | 289.0               |
| 5 Pulse Sequence          | zgpg30              |
| 6 Experiment              | 1D                  |
| 7 Number of Scans         | 1024                |
| 8 Receiver Gain           | 190.5               |
| 9 Relaxation Delay        | 2.0000              |
| 10 Pulse Width            | 10.0000             |
| 11 Spectrometer Frequency | 125.83              |
| 12 Spectral Width         | 31512.6             |
| 13 Lowest Frequency       | -1903.8             |
| 14 Nucleus                | 13C                 |
| 15 Acquired Size          | 32768               |
| 16 Spectral Size          | 65536               |

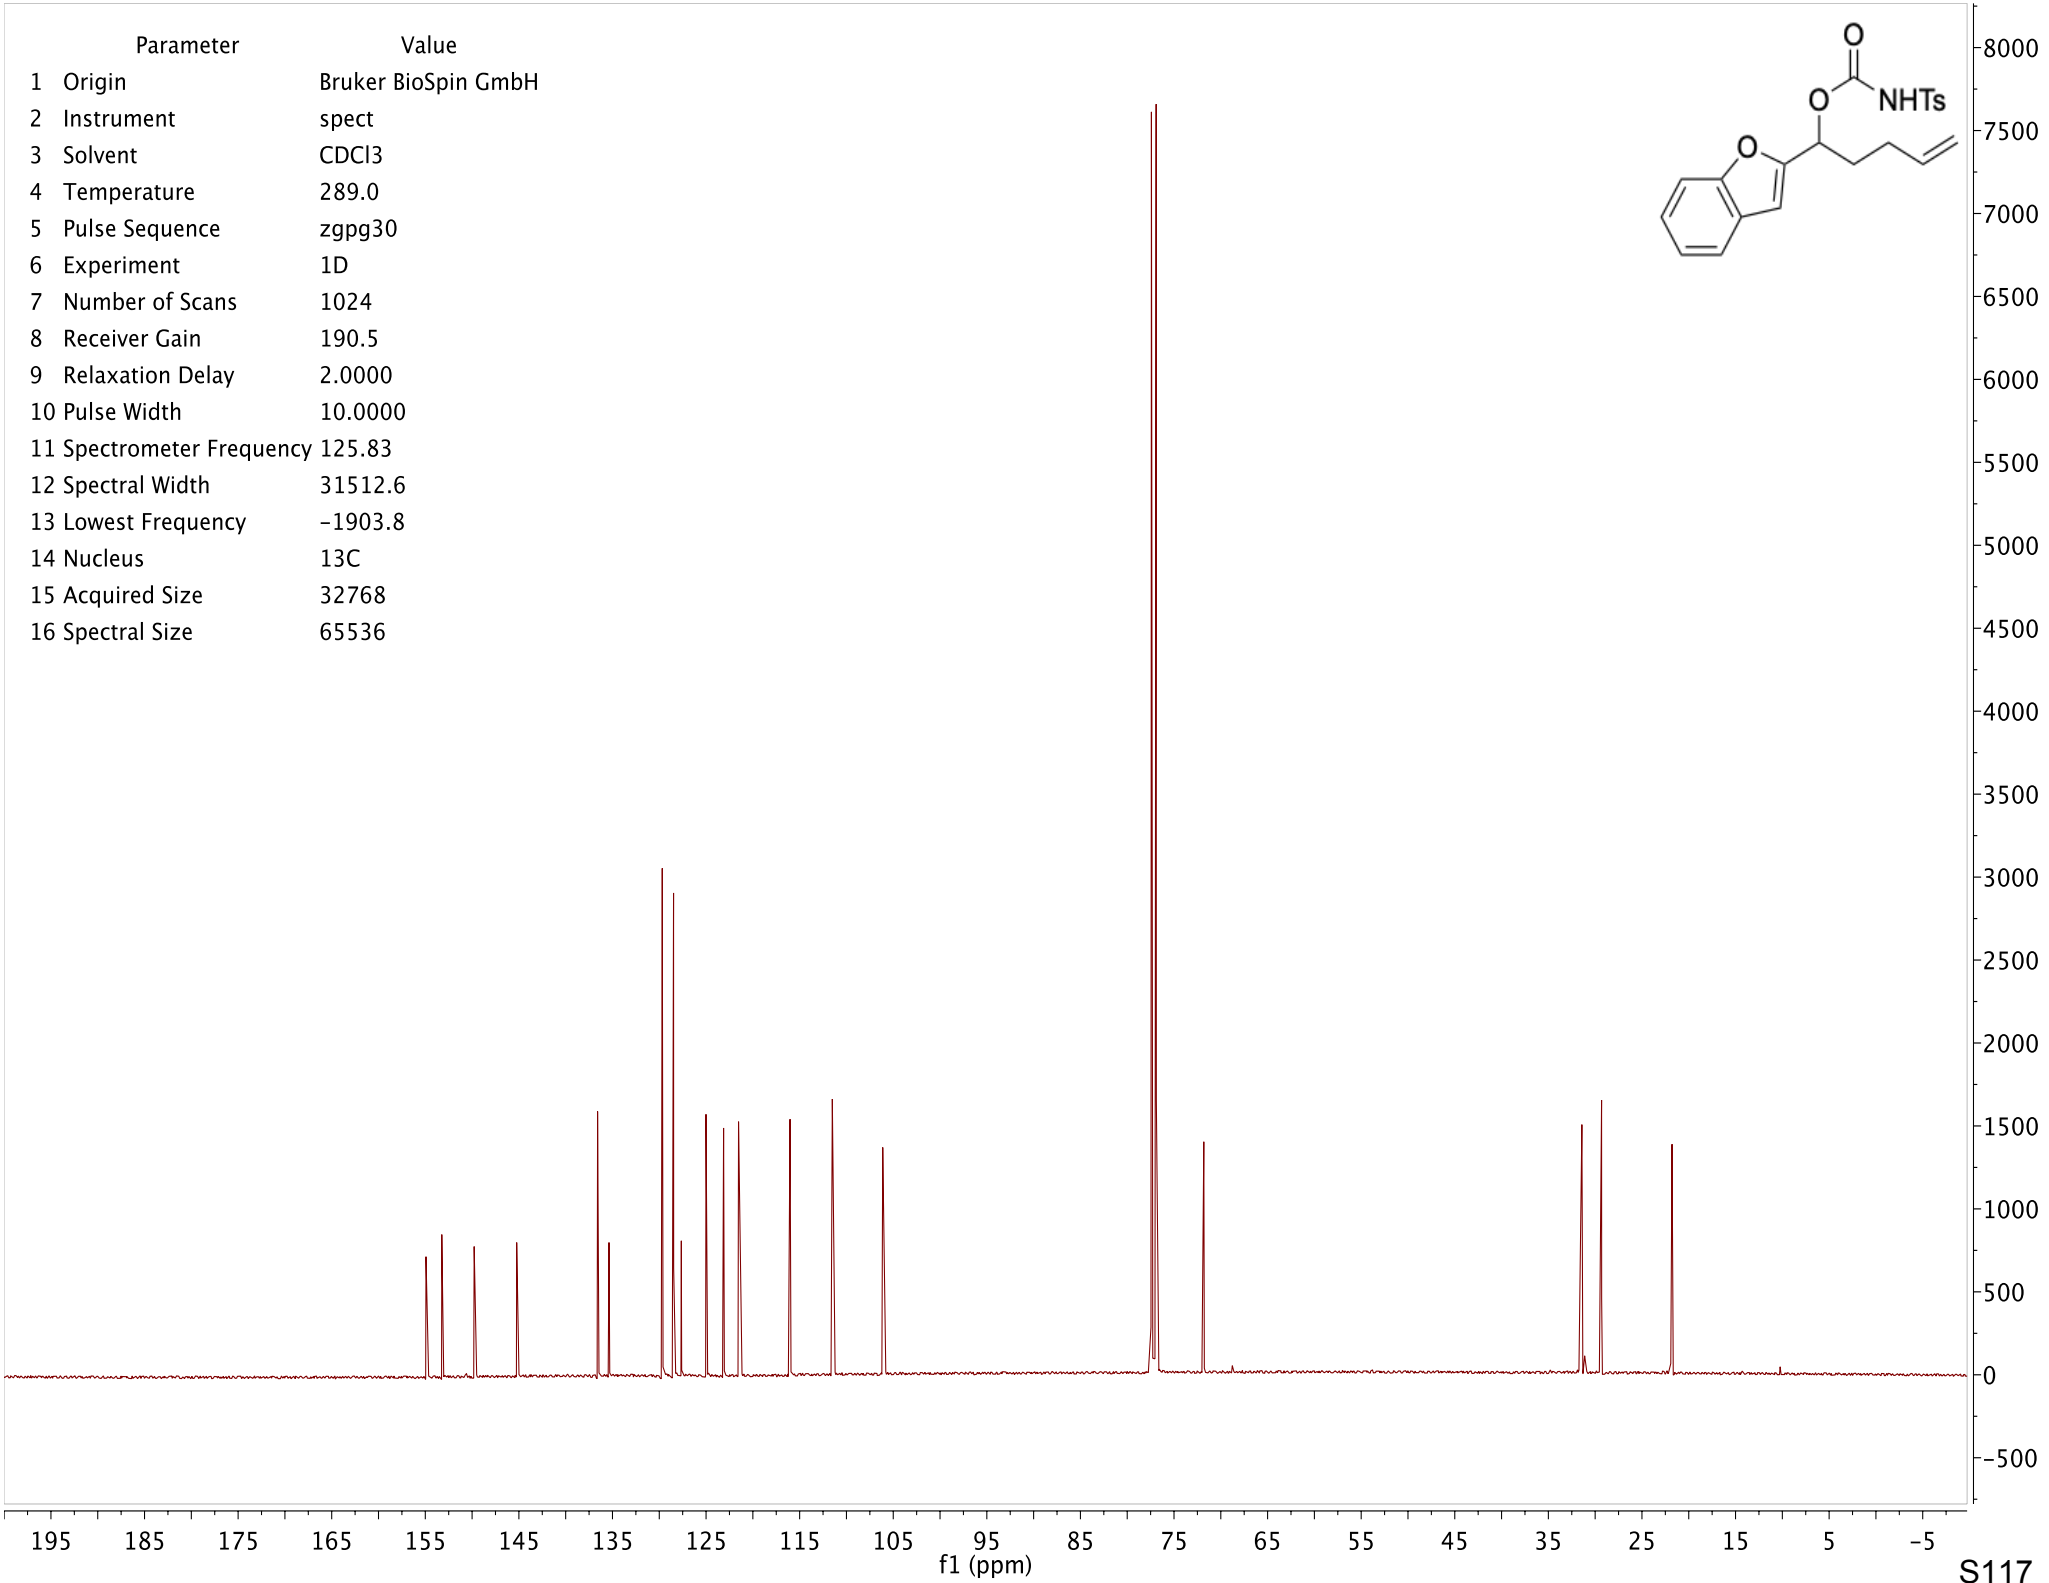

Parameters

| Parameter                 | Value               |
|---------------------------|---------------------|
| 1 Origin                  | Bruker BioSpin GmbH |
| 2 Instrument              | spect               |
| 3 Solvent                 | CDCl3               |
| 4 Temperature             | 298.1               |
| 5 Pulse Sequence          | zg30                |
| 6 Experiment              | 1D                  |
| 7 Number of Scans         | 16                  |
| 8 Receiver Gain           | 168.2               |
| 9 Relaxation Delay        | 1.0000              |
| 10 Pulse Width            | 12.0000             |
| 11 Spectrometer Frequency | 500.35              |
| 12 Spectral Width         | 10000.0             |
| 13 Lowest Frequency       | -1921.8             |
| 14 Nucleus                | 1H                  |
| 15 Acquired Size          | 32768               |
| 16 Spectral Size          | 65536               |

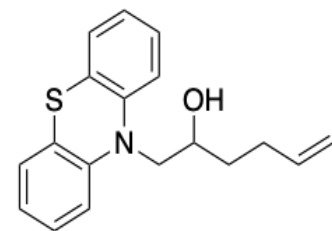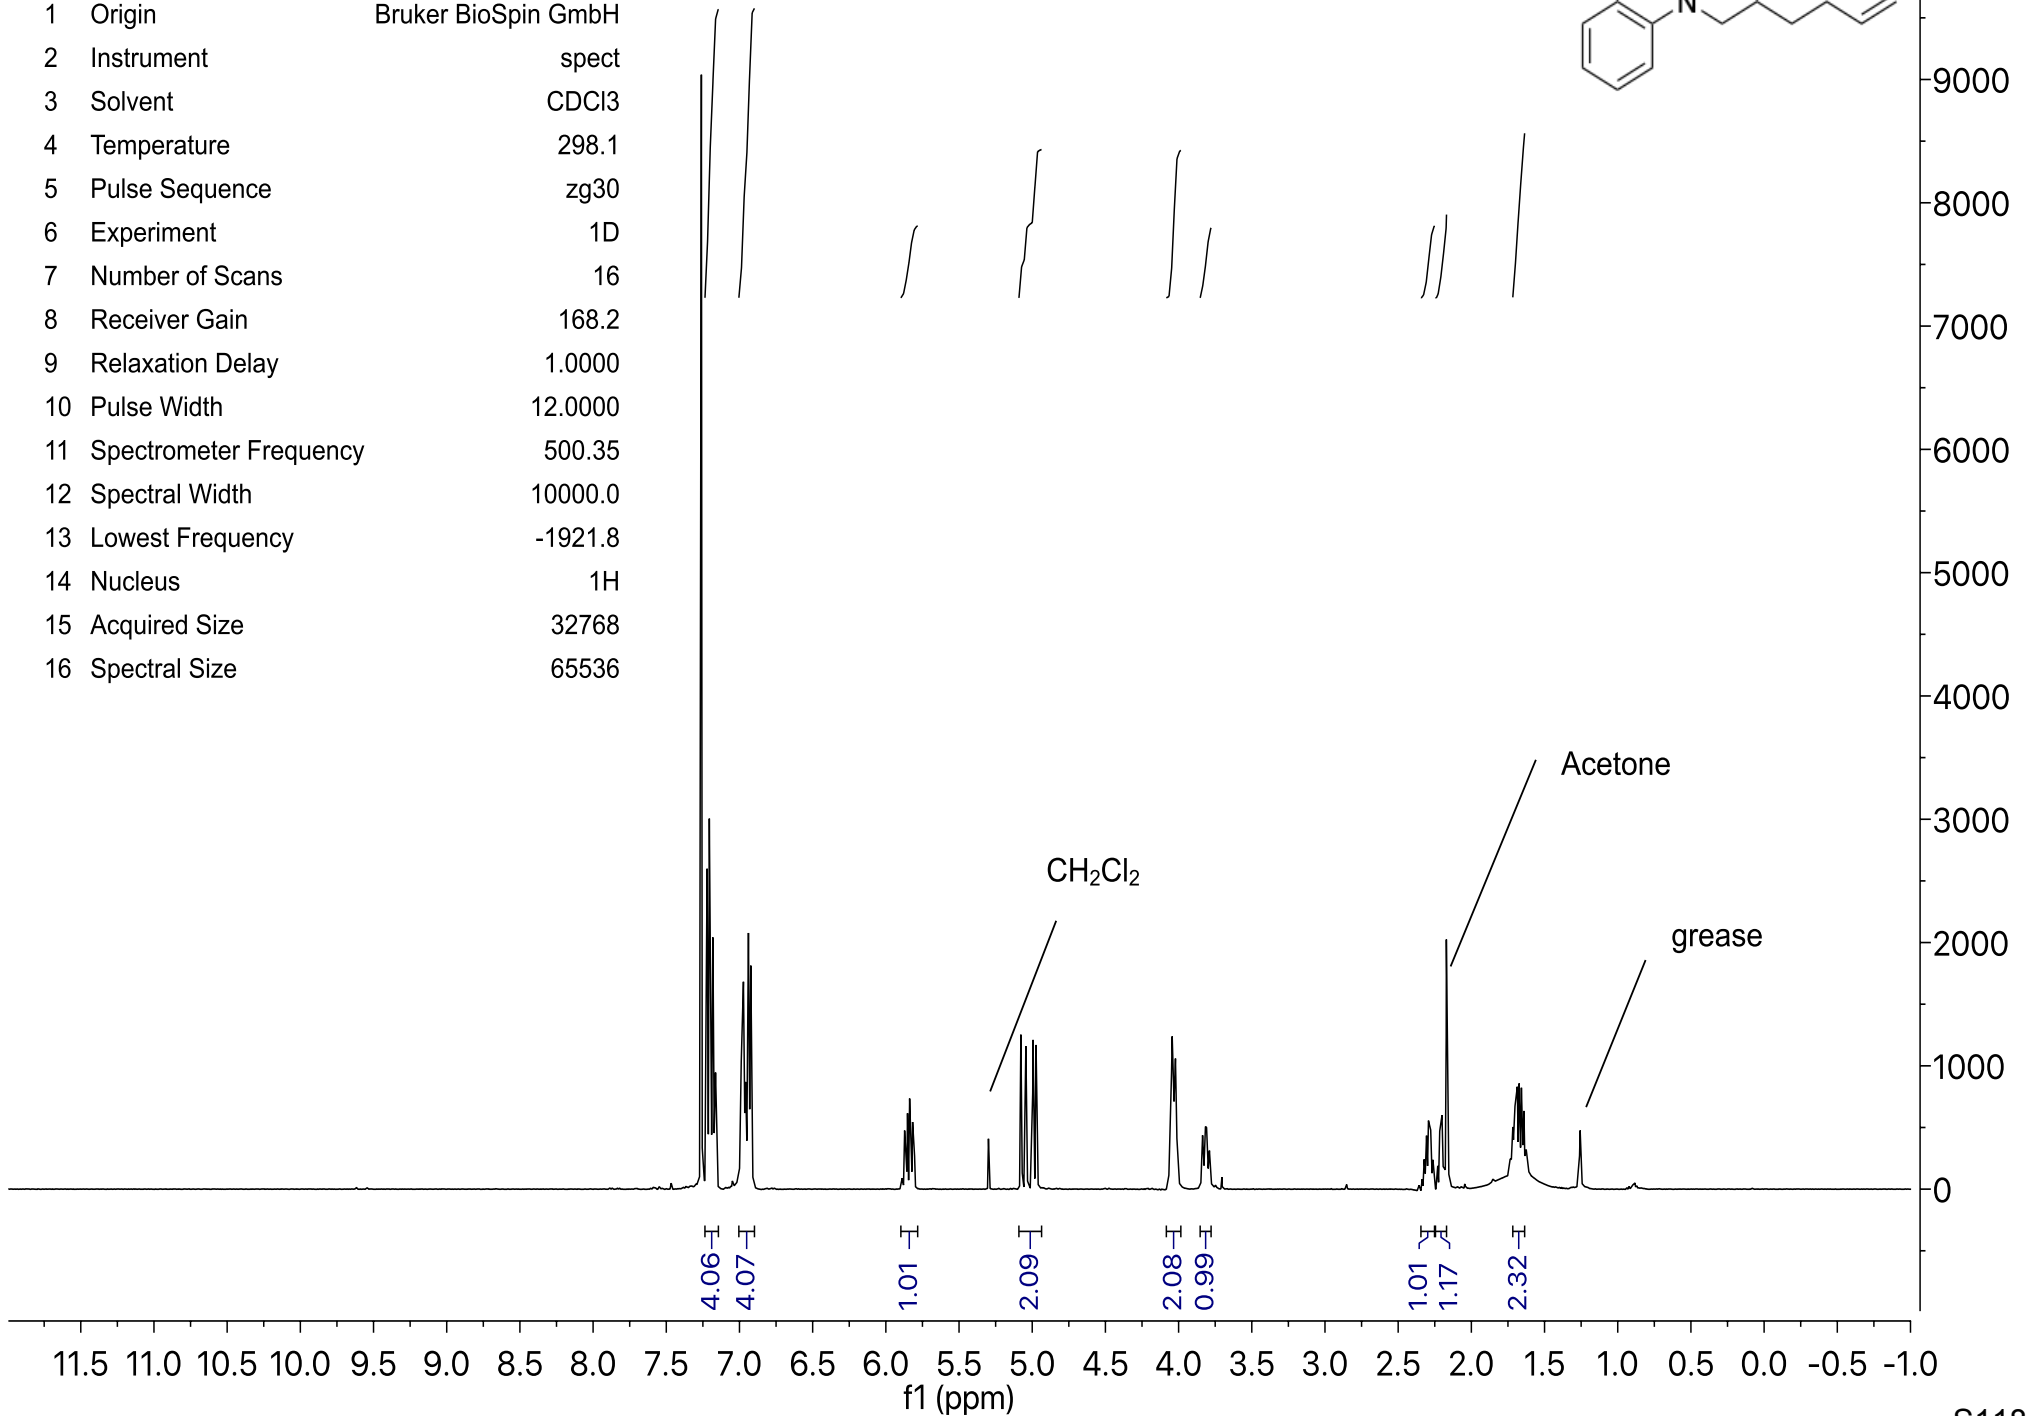



Parameters

| Parameter                 | Value               |
|---------------------------|---------------------|
| 1 Origin                  | Bruker BioSpin GmbH |
| 2 Instrument              | spect               |
| 3 Solvent                 | CDCl3               |
| 4 Temperature             | 298.1               |
| 5 Pulse Sequence          | zgpg30              |
| 6 Experiment              | 1D                  |
| 7 Number of Scans         | 1080                |
| 8 Receiver Gain           | 190.5               |
| 9 Relaxation Delay        | 1.0000              |
| 10 Pulse Width            | 10.0000             |
| 11 Spectrometer Frequency | 125.83              |
| 12 Spectral Width         | 31512.6             |
| 13 Lowest Frequency       | -1897.4             |
| 14 Nucleus                | <sup>13</sup> C     |
| 15 Acquired Size          | 32768               |
| 16 Spectral Size          | 65536               |

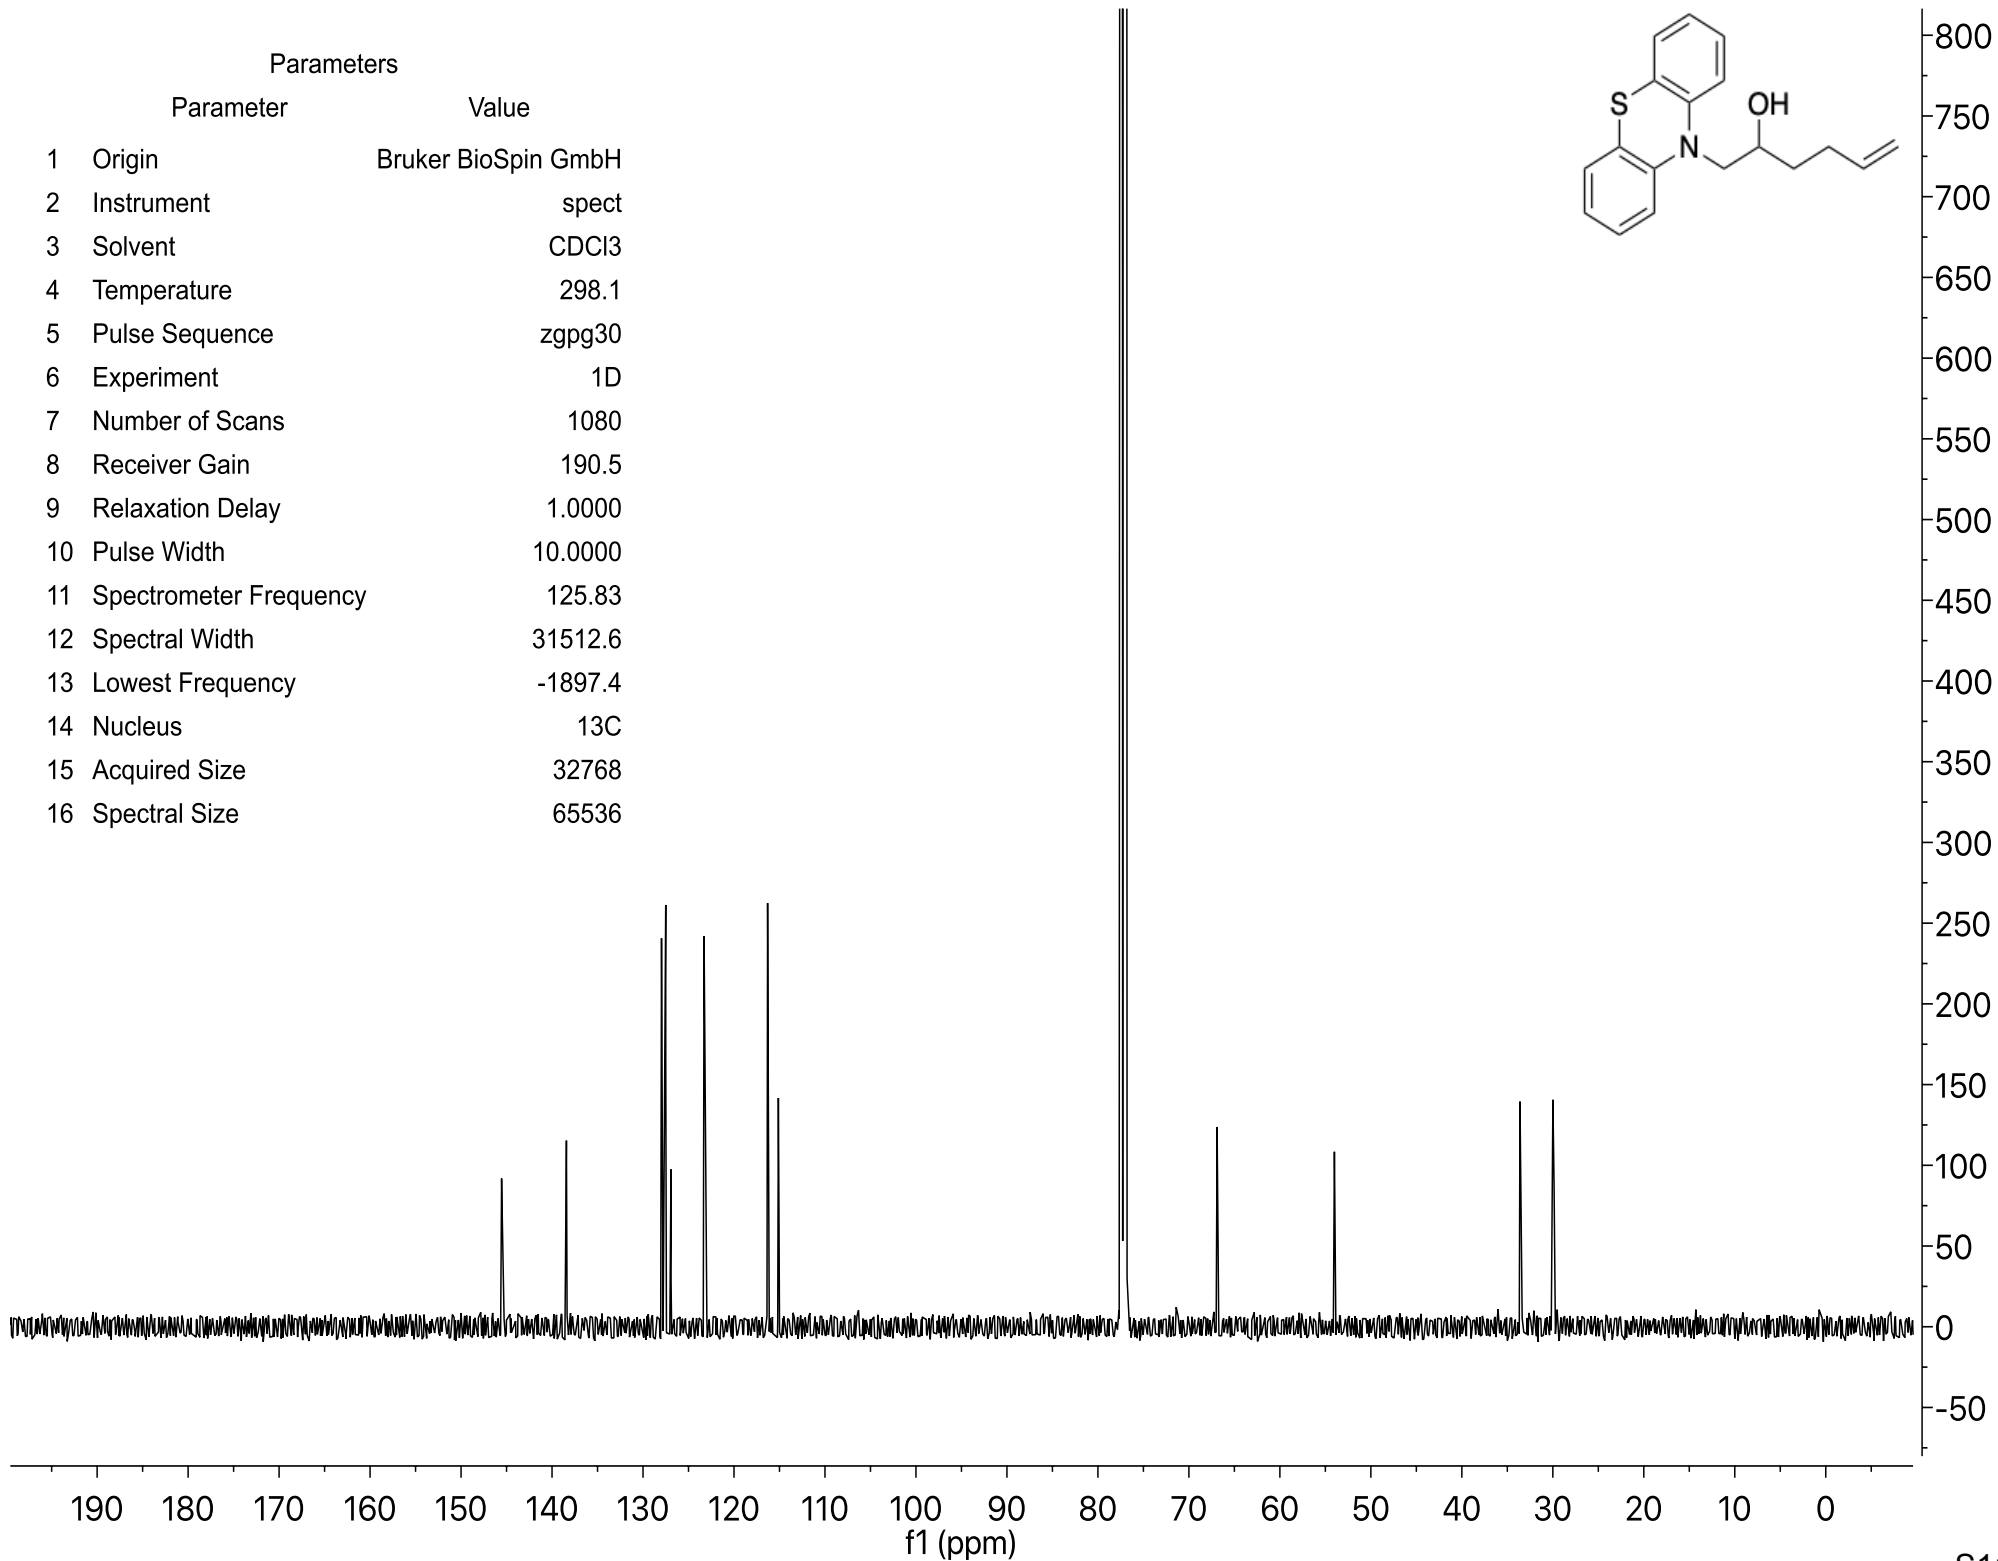

| Parameter                 | Value               |
|---------------------------|---------------------|
| 1 Origin                  | Bruker BioSpin GmbH |
| 2 Instrument              | spect               |
| 3 Solvent                 | CDCl3               |
| 4 Temperature             | 298.2               |
| 5 Pulse Sequence          | zg30                |
| 6 Experiment              | 1D                  |
| 7 Number of Scans         | 5                   |
| 8 Receiver Gain           | 94.3                |
| 9 Relaxation Delay        | 15.0000             |
| 10 Pulse Width            | 12.0000             |
| 11 Spectrometer Frequency | 500.35              |
| 12 Spectral Width         | 10000.0             |
| 13 Lowest Frequency       | -1922.3             |
| 14 Nucleus                | 1H                  |
| 15 Acquired Size          | 32768               |
| 16 Spectral Size          | 65536               |

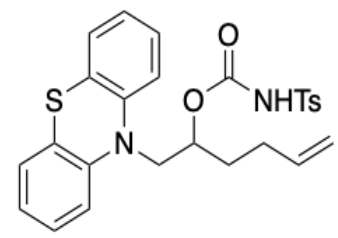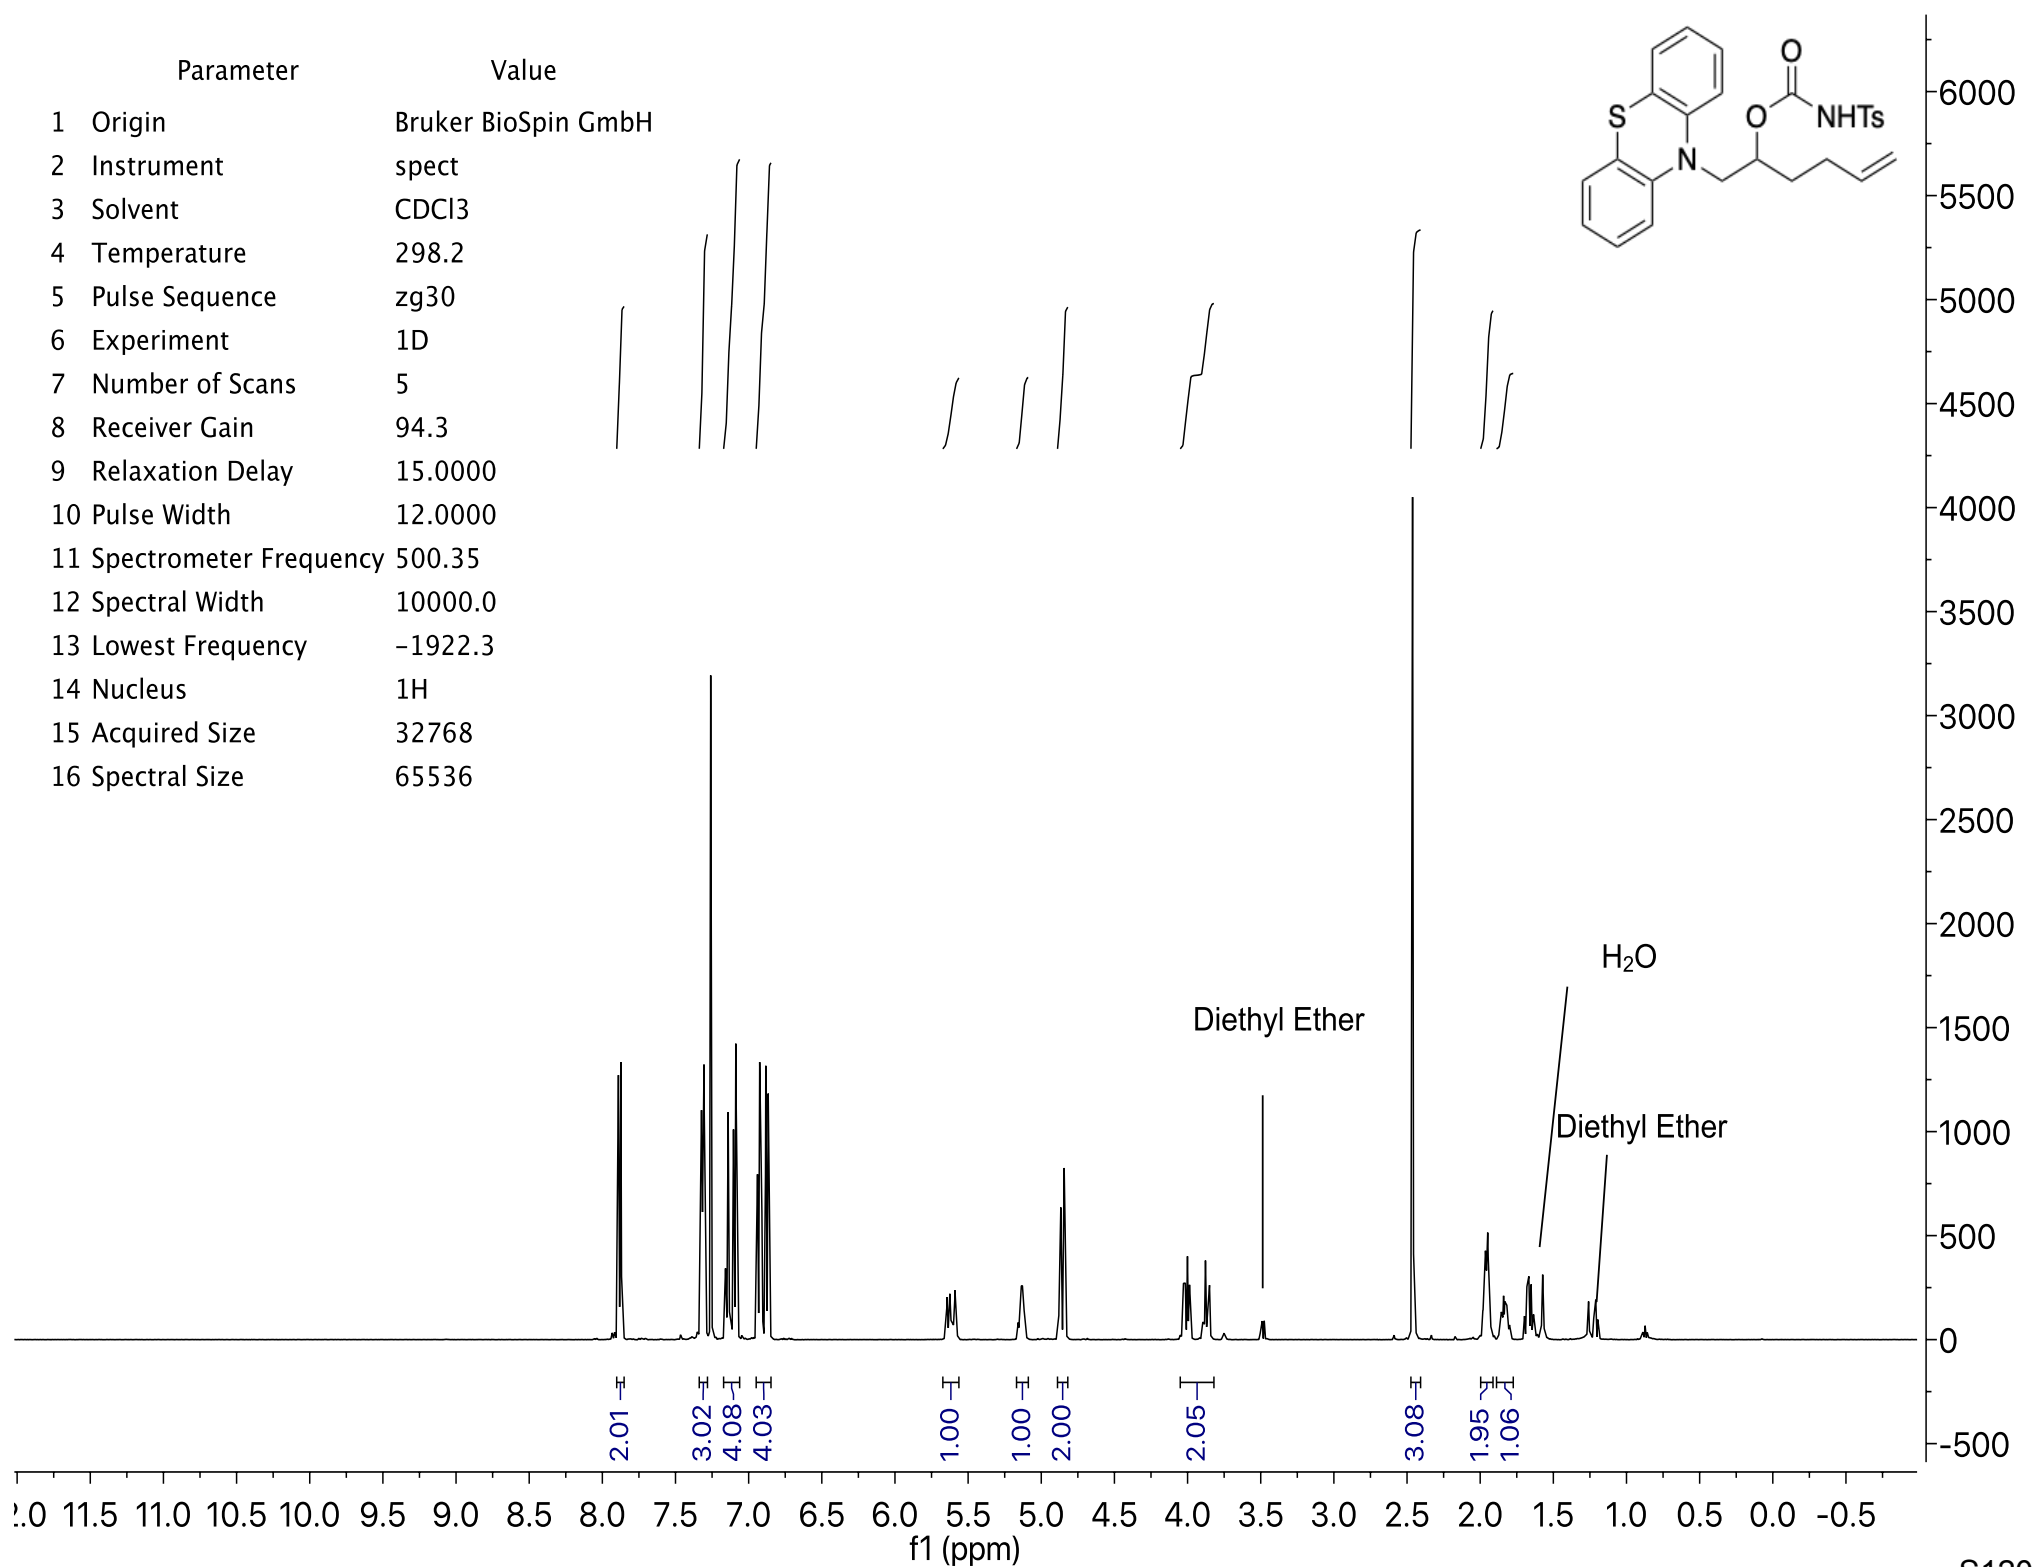

| Parameter                 | Value               |
|---------------------------|---------------------|
| 1 Origin                  | Bruker BioSpin GmbH |
| 2 Instrument              | spect               |
| 3 Solvent                 | CDCl3               |
| 4 Temperature             | 298.2               |
| 5 Pulse Sequence          | zgpg30              |
| 6 Experiment              | 1D                  |
| 7 Number of Scans         | 512                 |
| 8 Receiver Gain           | 190.5               |
| 9 Relaxation Delay        | 1.0000              |
| 10 Pulse Width            | 10.0000             |
| 11 Spectrometer Frequency | 125.83              |
| 12 Spectral Width         | 31512.6             |
| 13 Lowest Frequency       | -1898.9             |
| 14 Nucleus                | 13C                 |
| 15 Acquired Size          | 32768               |
| 16 Spectral Size          | 65536               |

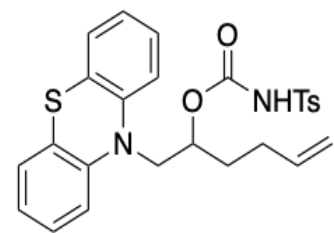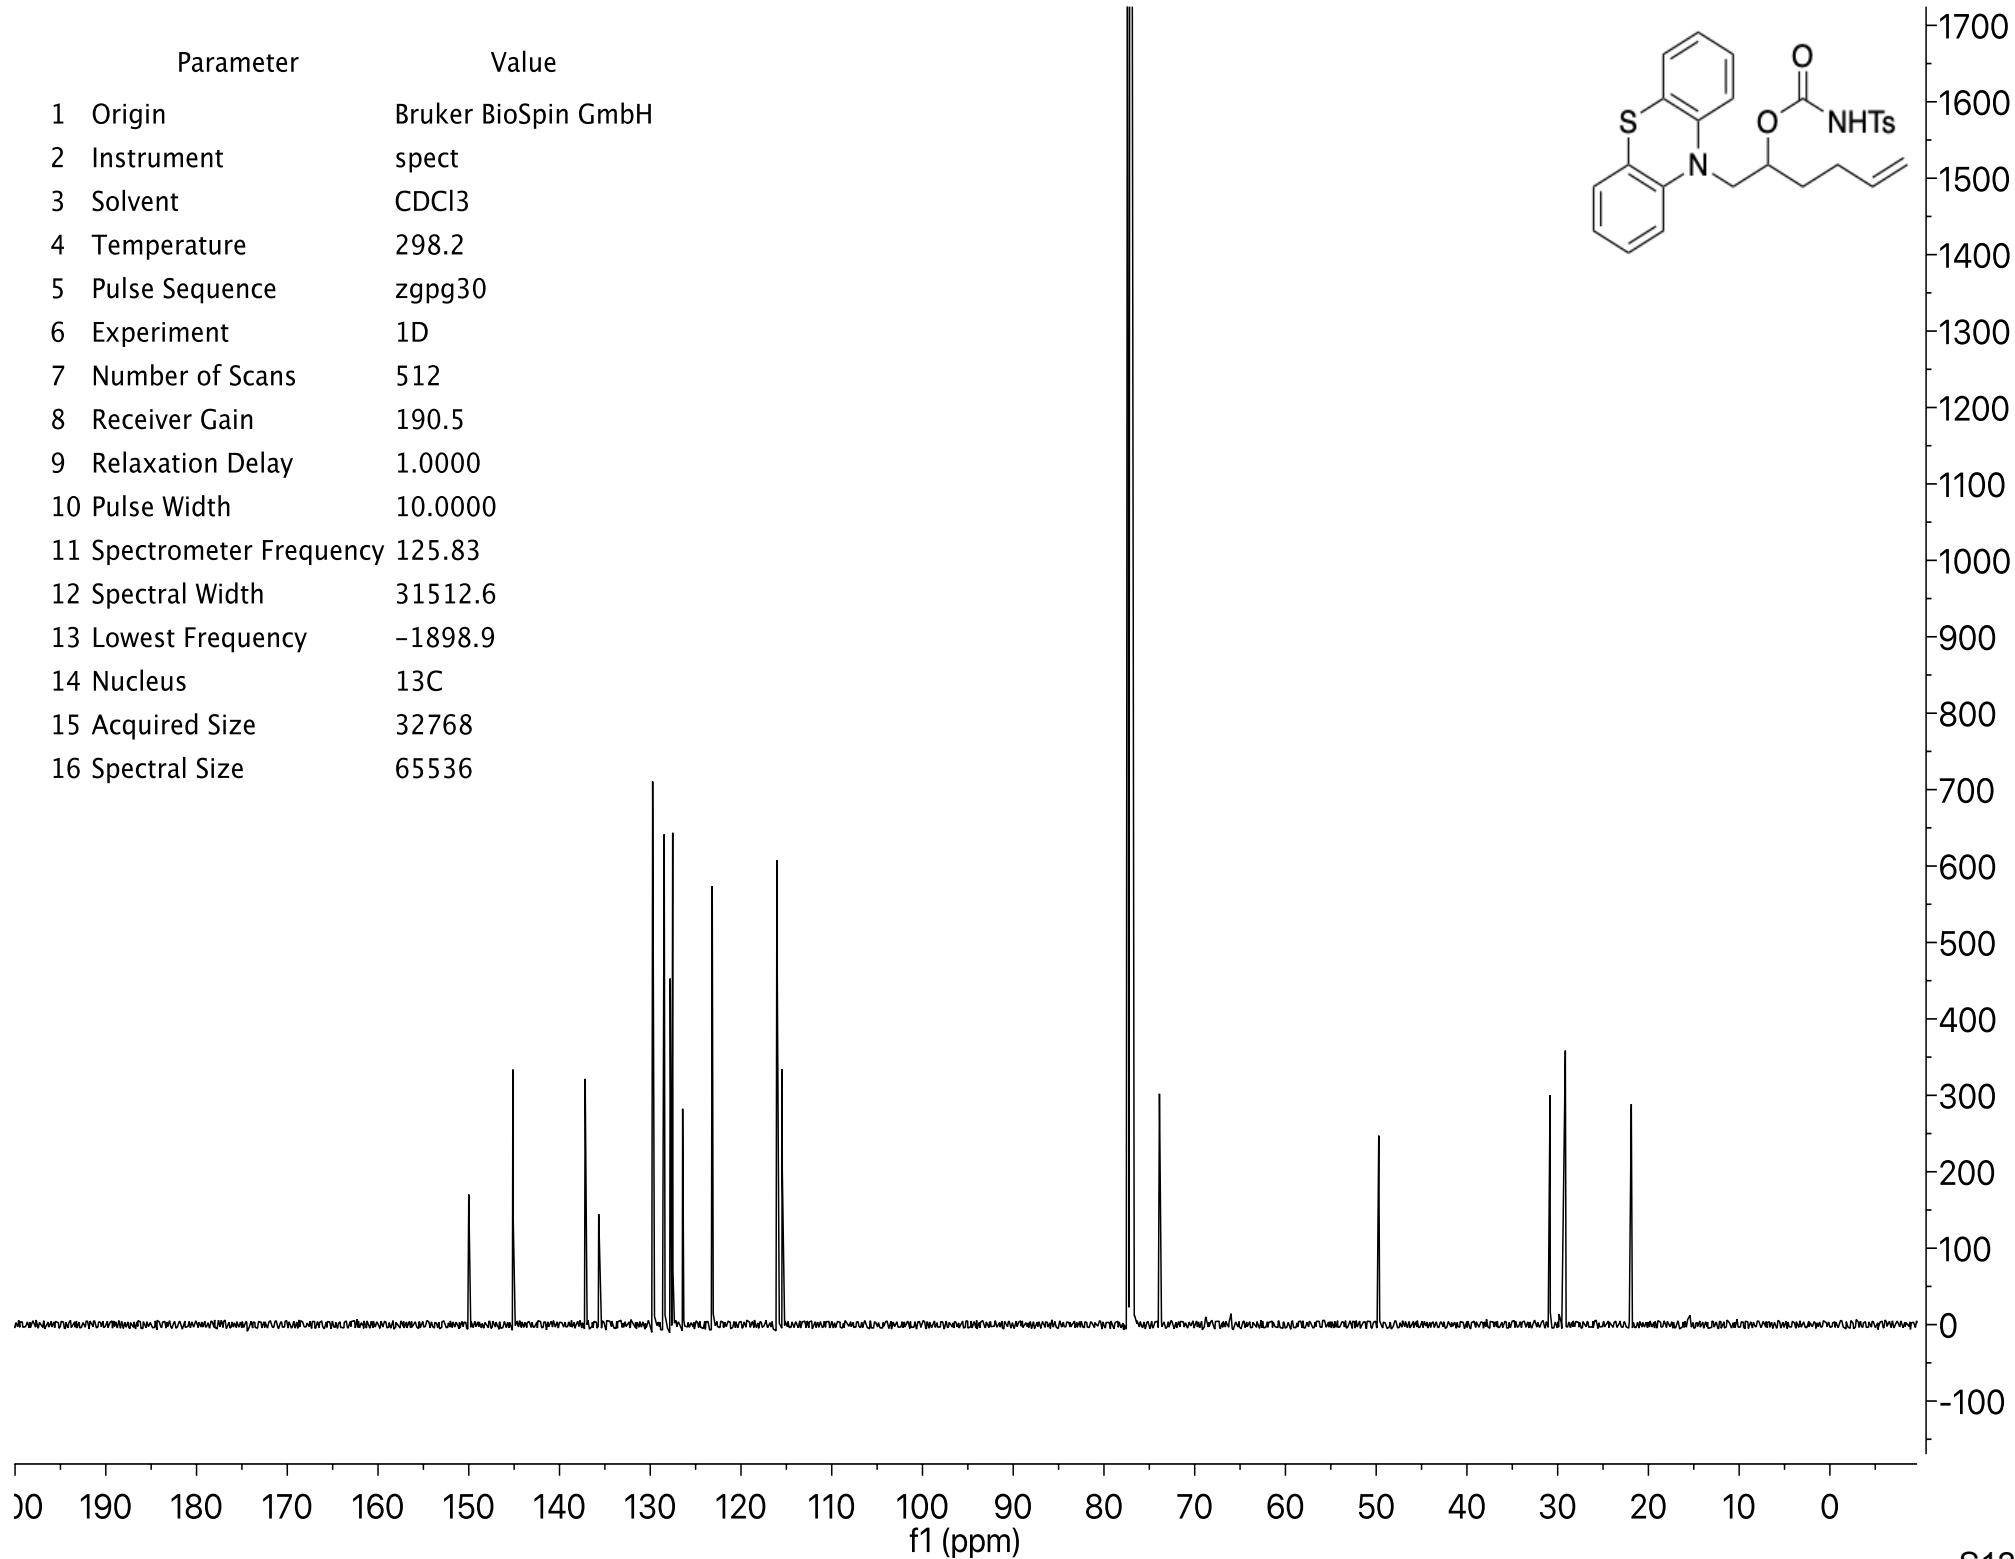

| Parameter                 | Value               |
|---------------------------|---------------------|
| 1 Origin                  | Bruker BioSpin GmbH |
| 2 Instrument              | spect               |
| 3 Solvent                 | CDCl3               |
| 4 Temperature             | 298.1               |
| 5 Pulse Sequence          | zg30                |
| 6 Experiment              | 1D                  |
| 7 Number of Scans         | 5                   |
| 8 Receiver Gain           | 76.2                |
| 9 Relaxation Delay        | 15.0000             |
| 10 Pulse Width            | 12.0000             |
| 11 Spectrometer Frequency | 500.35              |
| 12 Spectral Width         | 10000.0             |
| 13 Lowest Frequency       | -1922.5             |
| 14 Nucleus                | 1H                  |
| 15 Acquired Size          | 32768               |
| 16 Spectral Size          | 65536               |

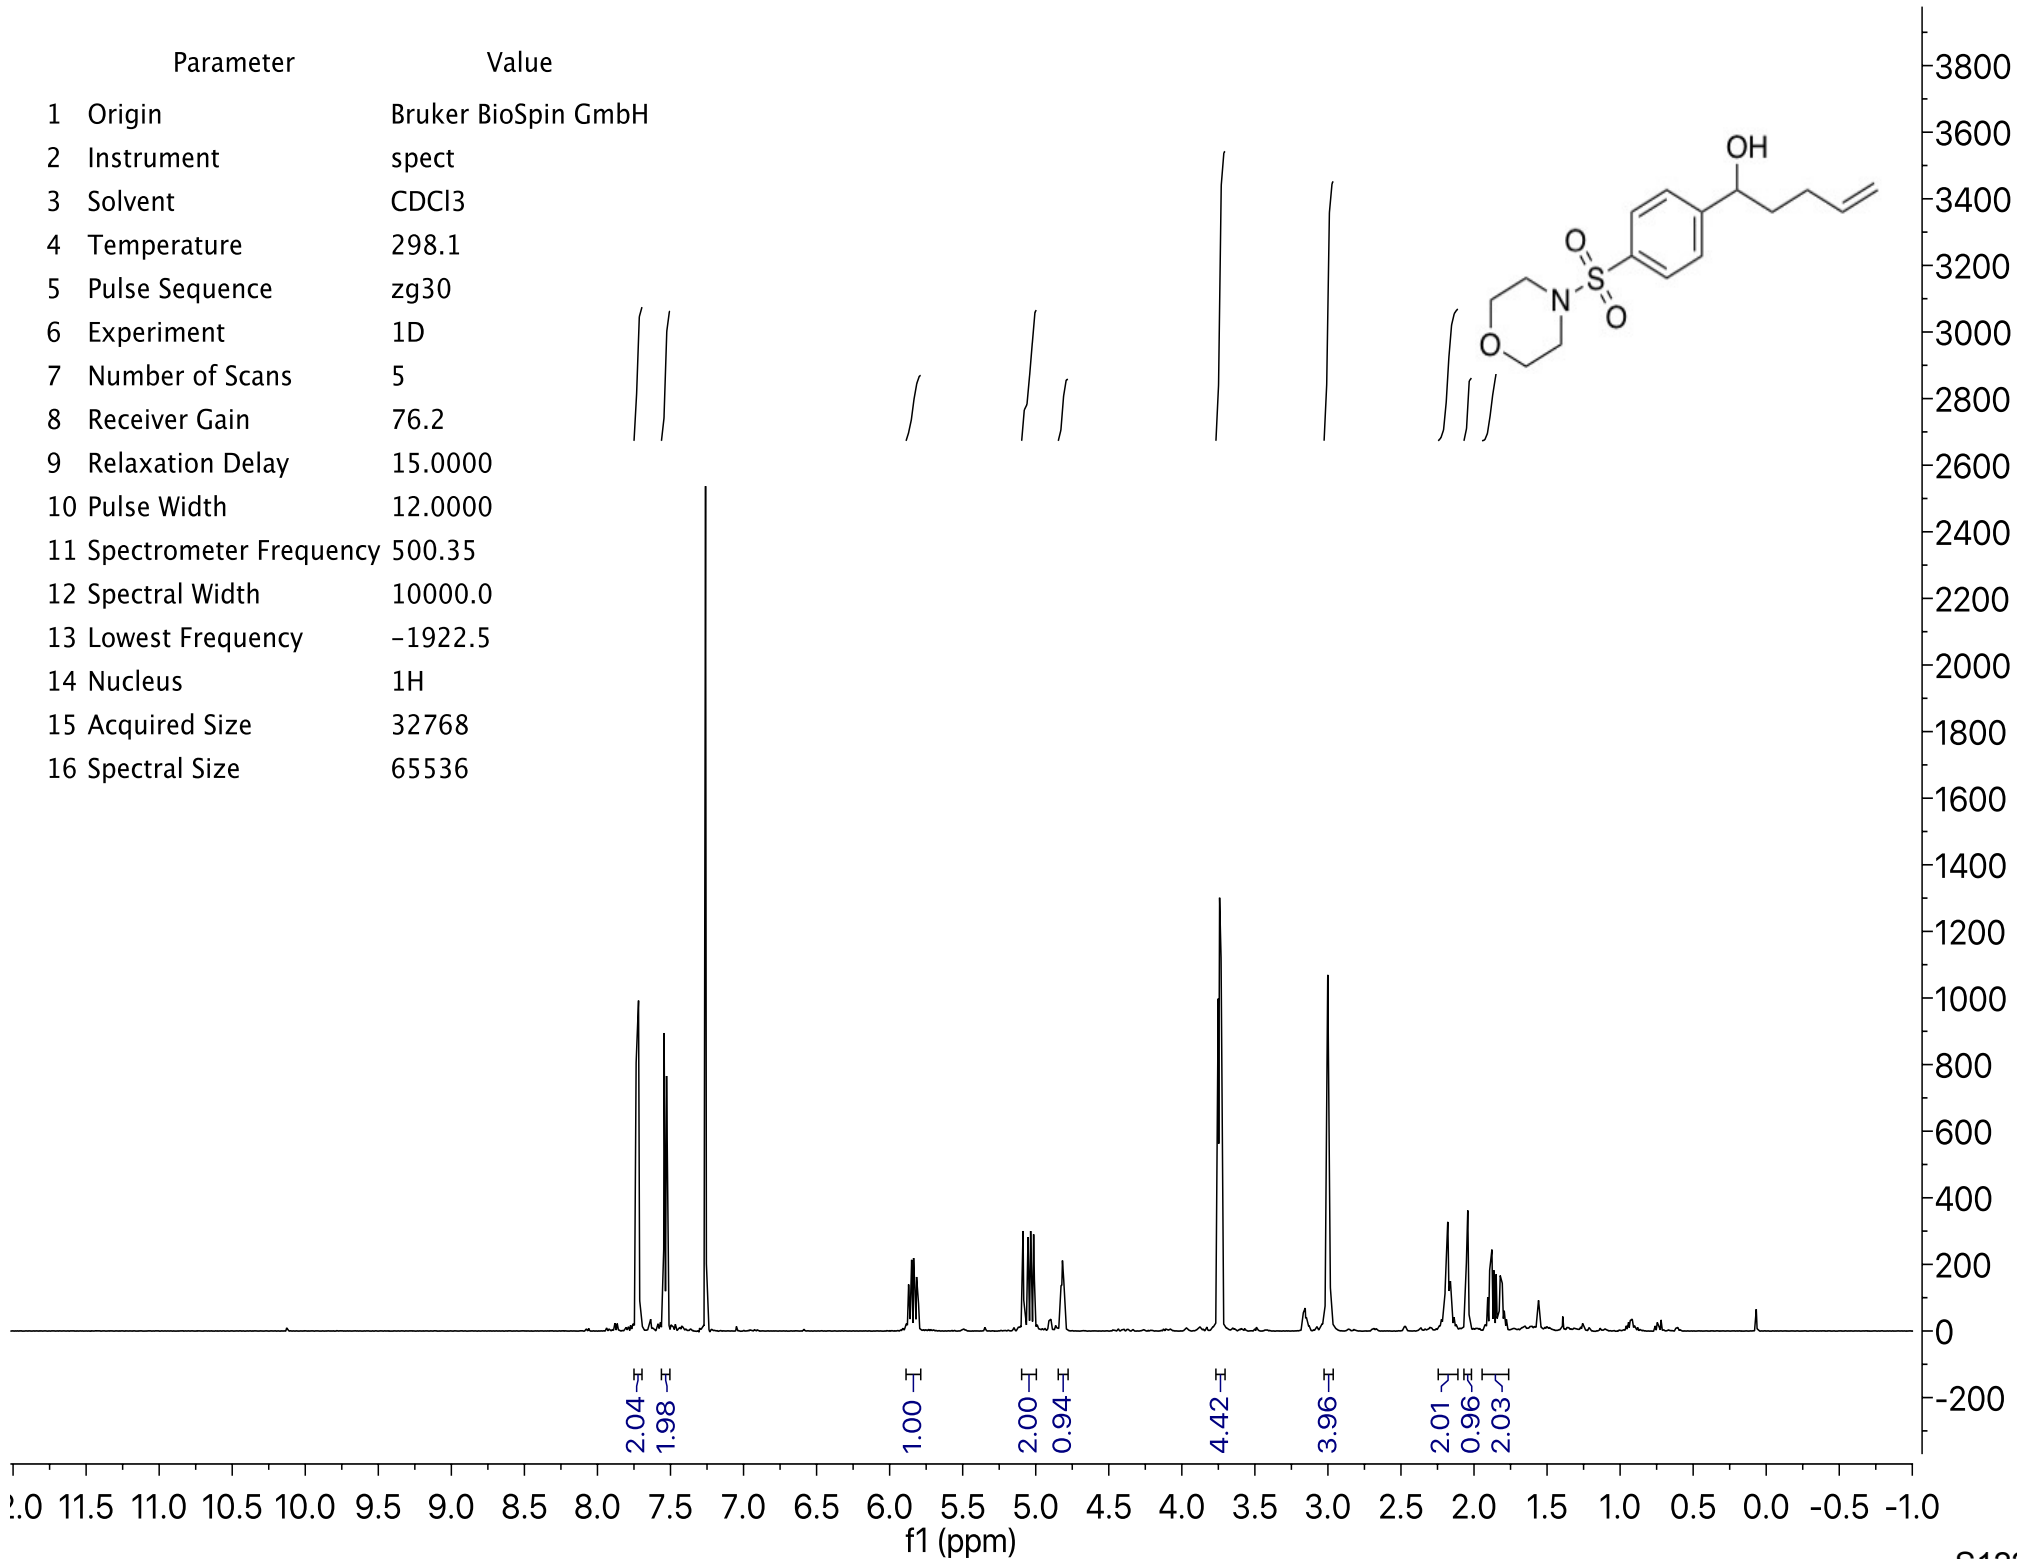

| Parameter                 | Value               |
|---------------------------|---------------------|
| 1 Origin                  | Bruker BioSpin GmbH |
| 2 Instrument              | spect               |
| 3 Solvent                 | CDCl3               |
| 4 Temperature             | 298.1               |
| 5 Pulse Sequence          | zgpg30              |
| 6 Experiment              | 1D                  |
| 7 Number of Scans         | 512                 |
| 8 Receiver Gain           | 190.5               |
| 9 Relaxation Delay        | 1.0000              |
| 10 Pulse Width            | 10.0000             |
| 11 Spectrometer Frequency | 125.83              |
| 12 Spectral Width         | 31512.6             |
| 13 Lowest Frequency       | -1898.2             |
| 14 Nucleus                | 13C                 |
| 15 Acquired Size          | 32768               |
| 16 Spectral Size          | 65536               |

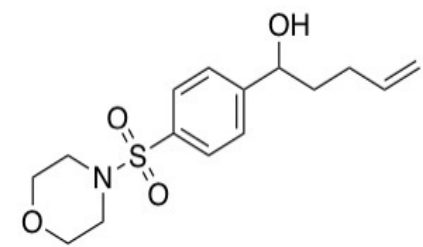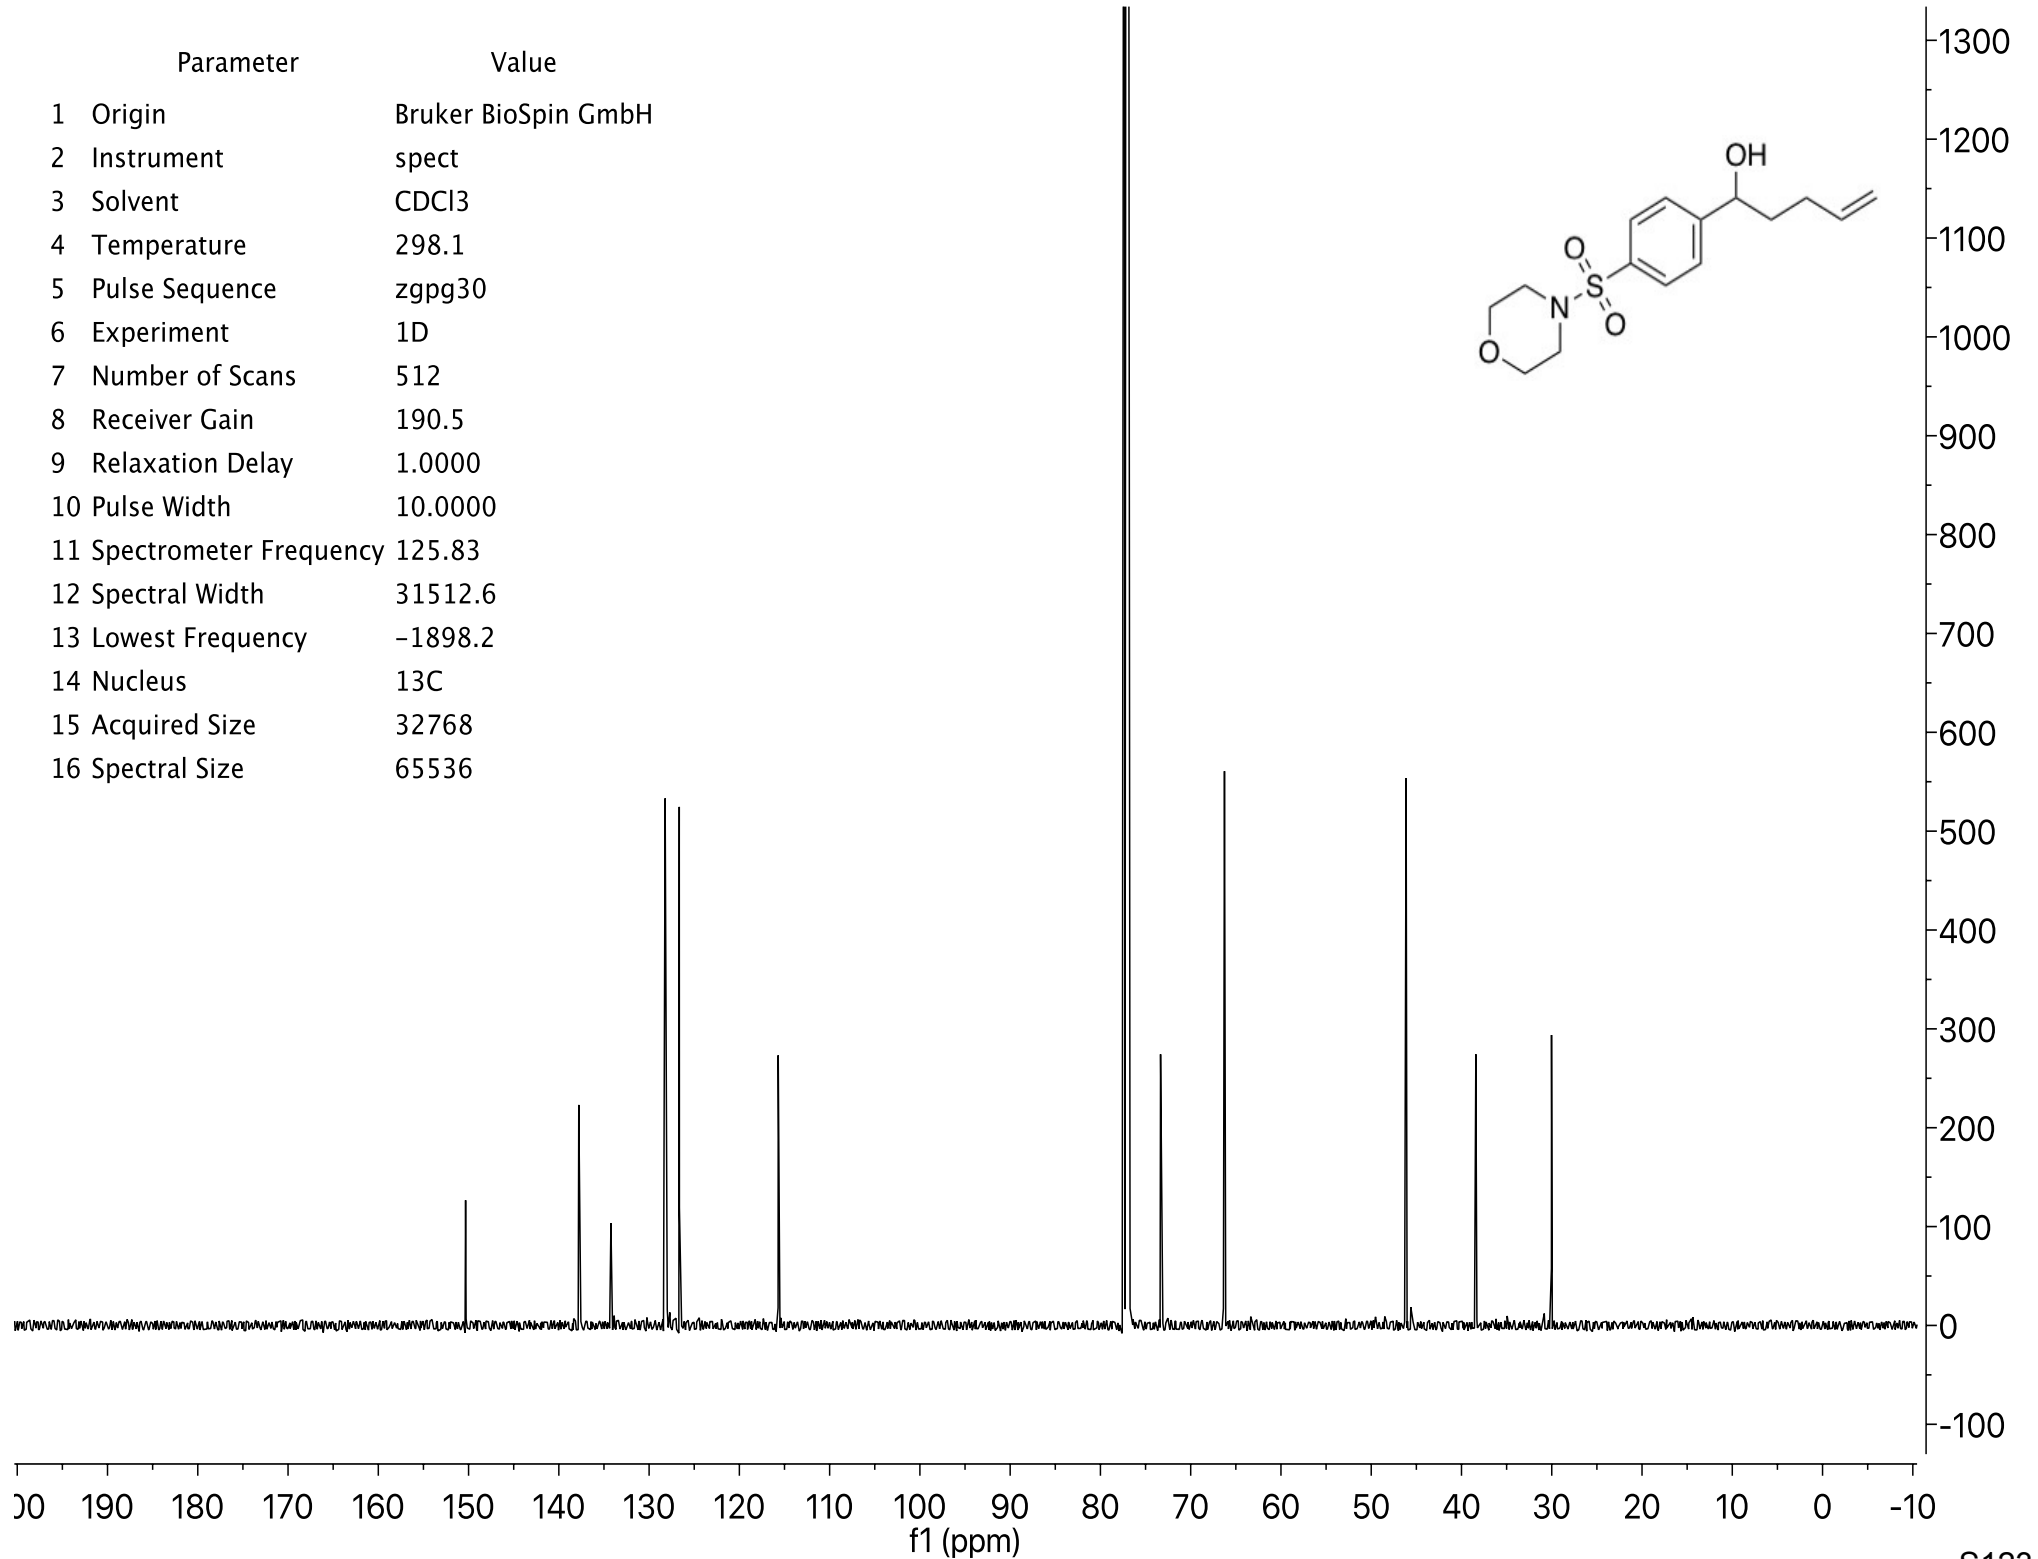

| Parameter                 | Value               |
|---------------------------|---------------------|
| 1 Origin                  | Bruker BioSpin GmbH |
| 2 Spectrometer            | spect               |
| 3 Solvent                 | CDCl3               |
| 4 Temperature             | 298.1               |
| 5 Pulse Sequence          | zg30                |
| 6 Experiment              | 1D                  |
| 7 Number of Scans         | 5                   |
| 8 Receiver Gain           | 123                 |
| 9 Relaxation Delay        | 15.0000             |
| 10 Pulse Width            | 12.0000             |
| 11 Spectrometer Frequency | 500.35              |
| 12 Spectral Width         | 10000.0             |
| 13 Lowest Frequency       | -1922.3             |
| 14 Nucleus                | 1H                  |
| 15 Acquired Size          | 32768               |
| 16 Spectral Size          | 65536               |

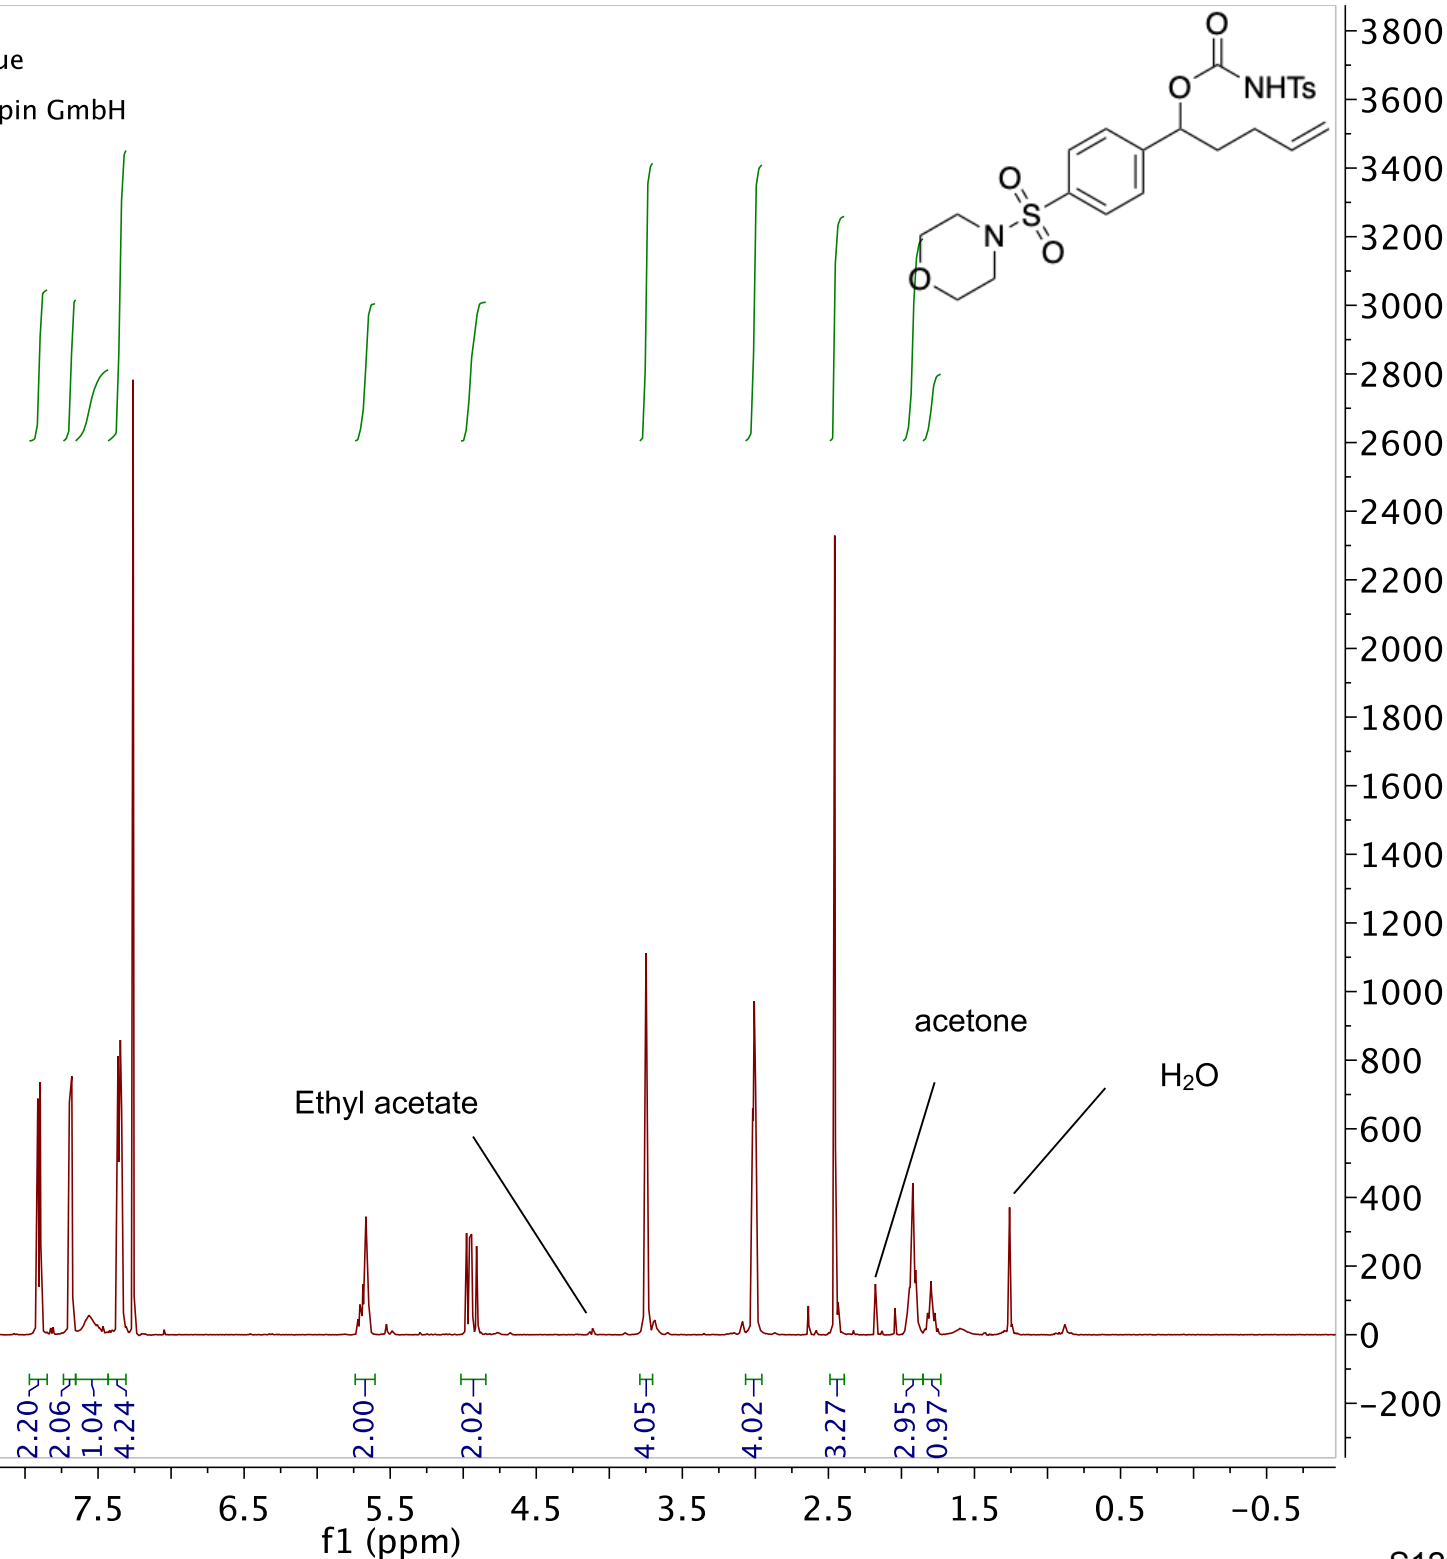

| Parameter                 | Value               |
|---------------------------|---------------------|
| 1 Origin                  | Bruker BioSpin GmbH |
| 2 Spectrometer            | spect               |
| 3 Solvent                 | CDCl3               |
| 4 Temperature             | 298.1               |
| 5 Pulse Sequence          | zgpg30              |
| 6 Experiment              | 1D                  |
| 7 Number of Scans         | 512                 |
| 8 Receiver Gain           | 191                 |
| 9 Relaxation Delay        | 1.0000              |
| 10 Pulse Width            | 10.0000             |
| 11 Spectrometer Frequency | 125.83              |
| 12 Spectral Width         | 31512.6             |
| 13 Lowest Frequency       | -1898.2             |
| 14 Nucleus                | 13C                 |
| 15 Acquired Size          | 32768               |
| 16 Spectral Size          | 65536               |

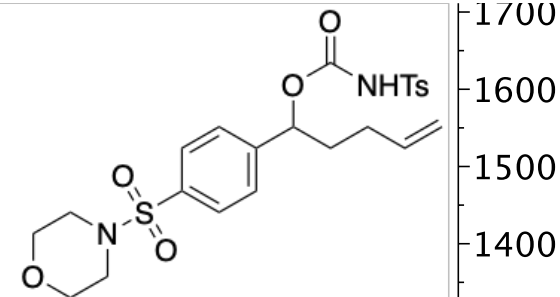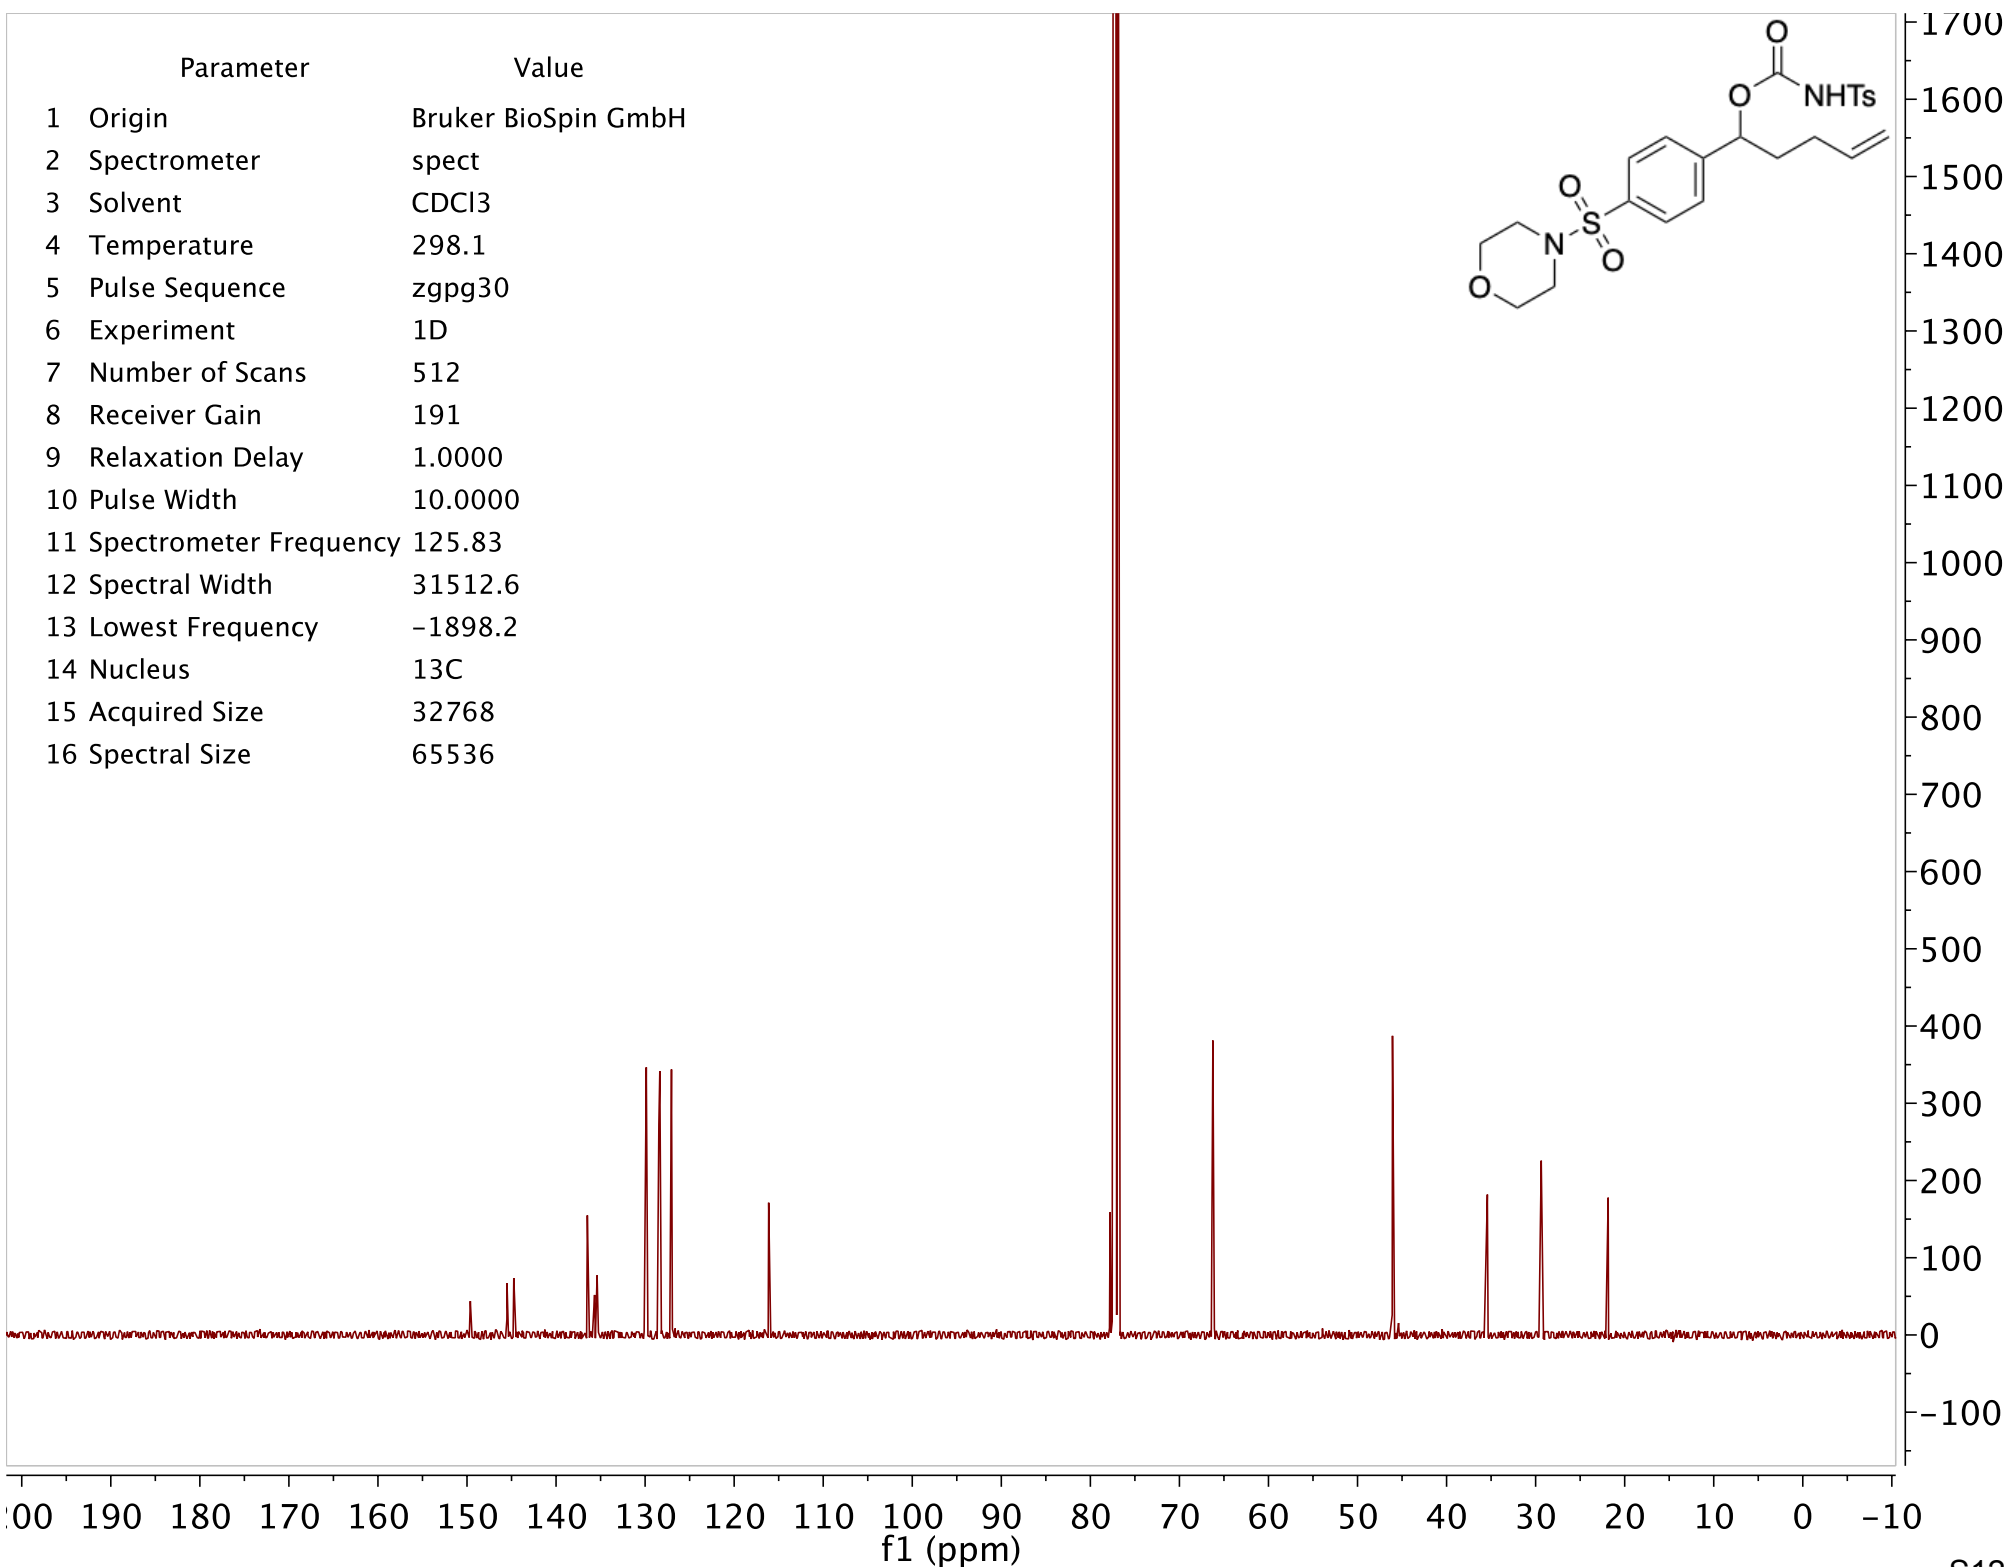

| Parameter                 | Value               |
|---------------------------|---------------------|
| 1 Origin                  | Bruker BioSpin GmbH |
| 2 Instrument              | spect               |
| 3 Solvent                 | CDCl3               |
| 4 Temperature             | 298.2               |
| 5 Pulse Sequence          | zg30                |
| 6 Experiment              | 1D                  |
| 7 Number of Scans         | 16                  |
| 8 Receiver Gain           | 61.8                |
| 9 Relaxation Delay        | 1.0000              |
| 10 Pulse Width            | 12.0000             |
| 11 Spectrometer Frequency | 500.35              |
| 12 Spectral Width         | 10000.0             |
| 13 Lowest Frequency       | -1921.8             |
| 14 Nucleus                | 1H                  |
| 15 Acquired Size          | 32768               |
| 16 Spectral Size          | 65536               |

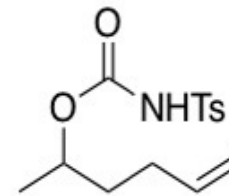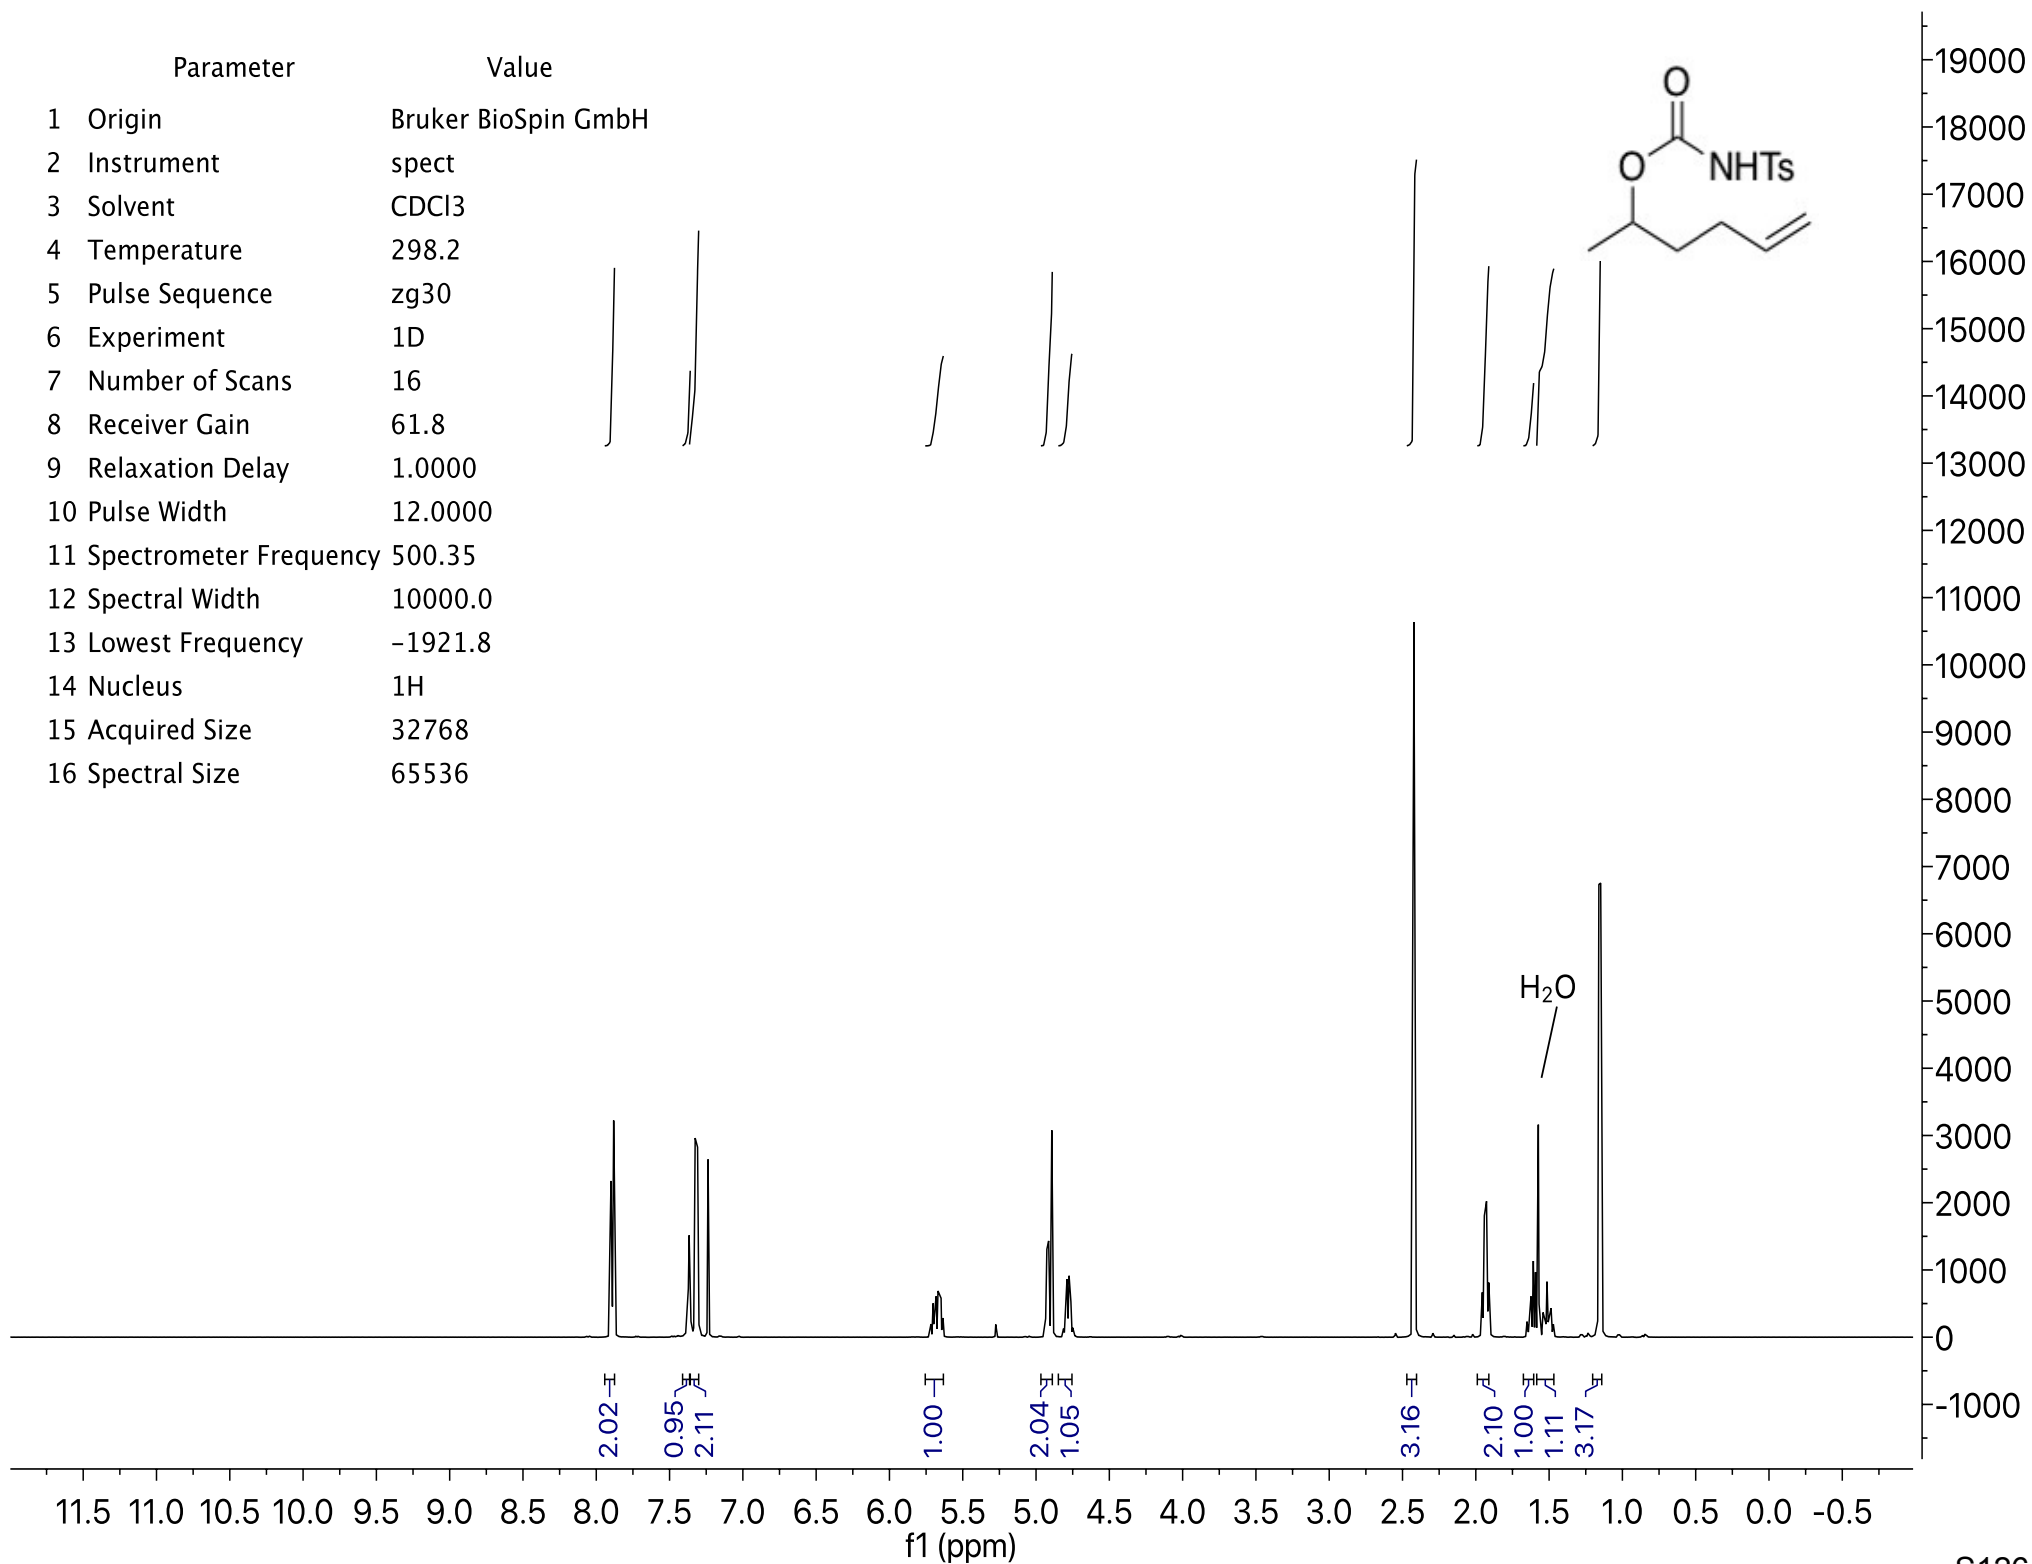



| Parameter                 | Value               |
|---------------------------|---------------------|
| 1 Origin                  | Bruker BioSpin GmbH |
| 2 Instrument              | spect               |
| 3 Solvent                 | CDCl3               |
| 4 Temperature             | 298.1               |
| 5 Pulse Sequence          | zgpg30              |
| 6 Experiment              | 1D                  |
| 7 Number of Scans         | 128                 |
| 8 Receiver Gain           | 190.5               |
| 9 Relaxation Delay        | 2.0000              |
| 10 Pulse Width            | 10.0000             |
| 11 Spectrometer Frequency | 125.83              |
| 12 Spectral Width         | 31512.6             |
| 13 Lowest Frequency       | -1898.6             |
| 14 Nucleus                | 13C                 |
| 15 Acquired Size          | 32768               |
| 16 Spectral Size          | 65536               |

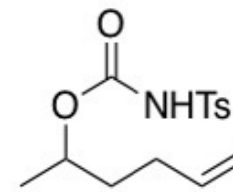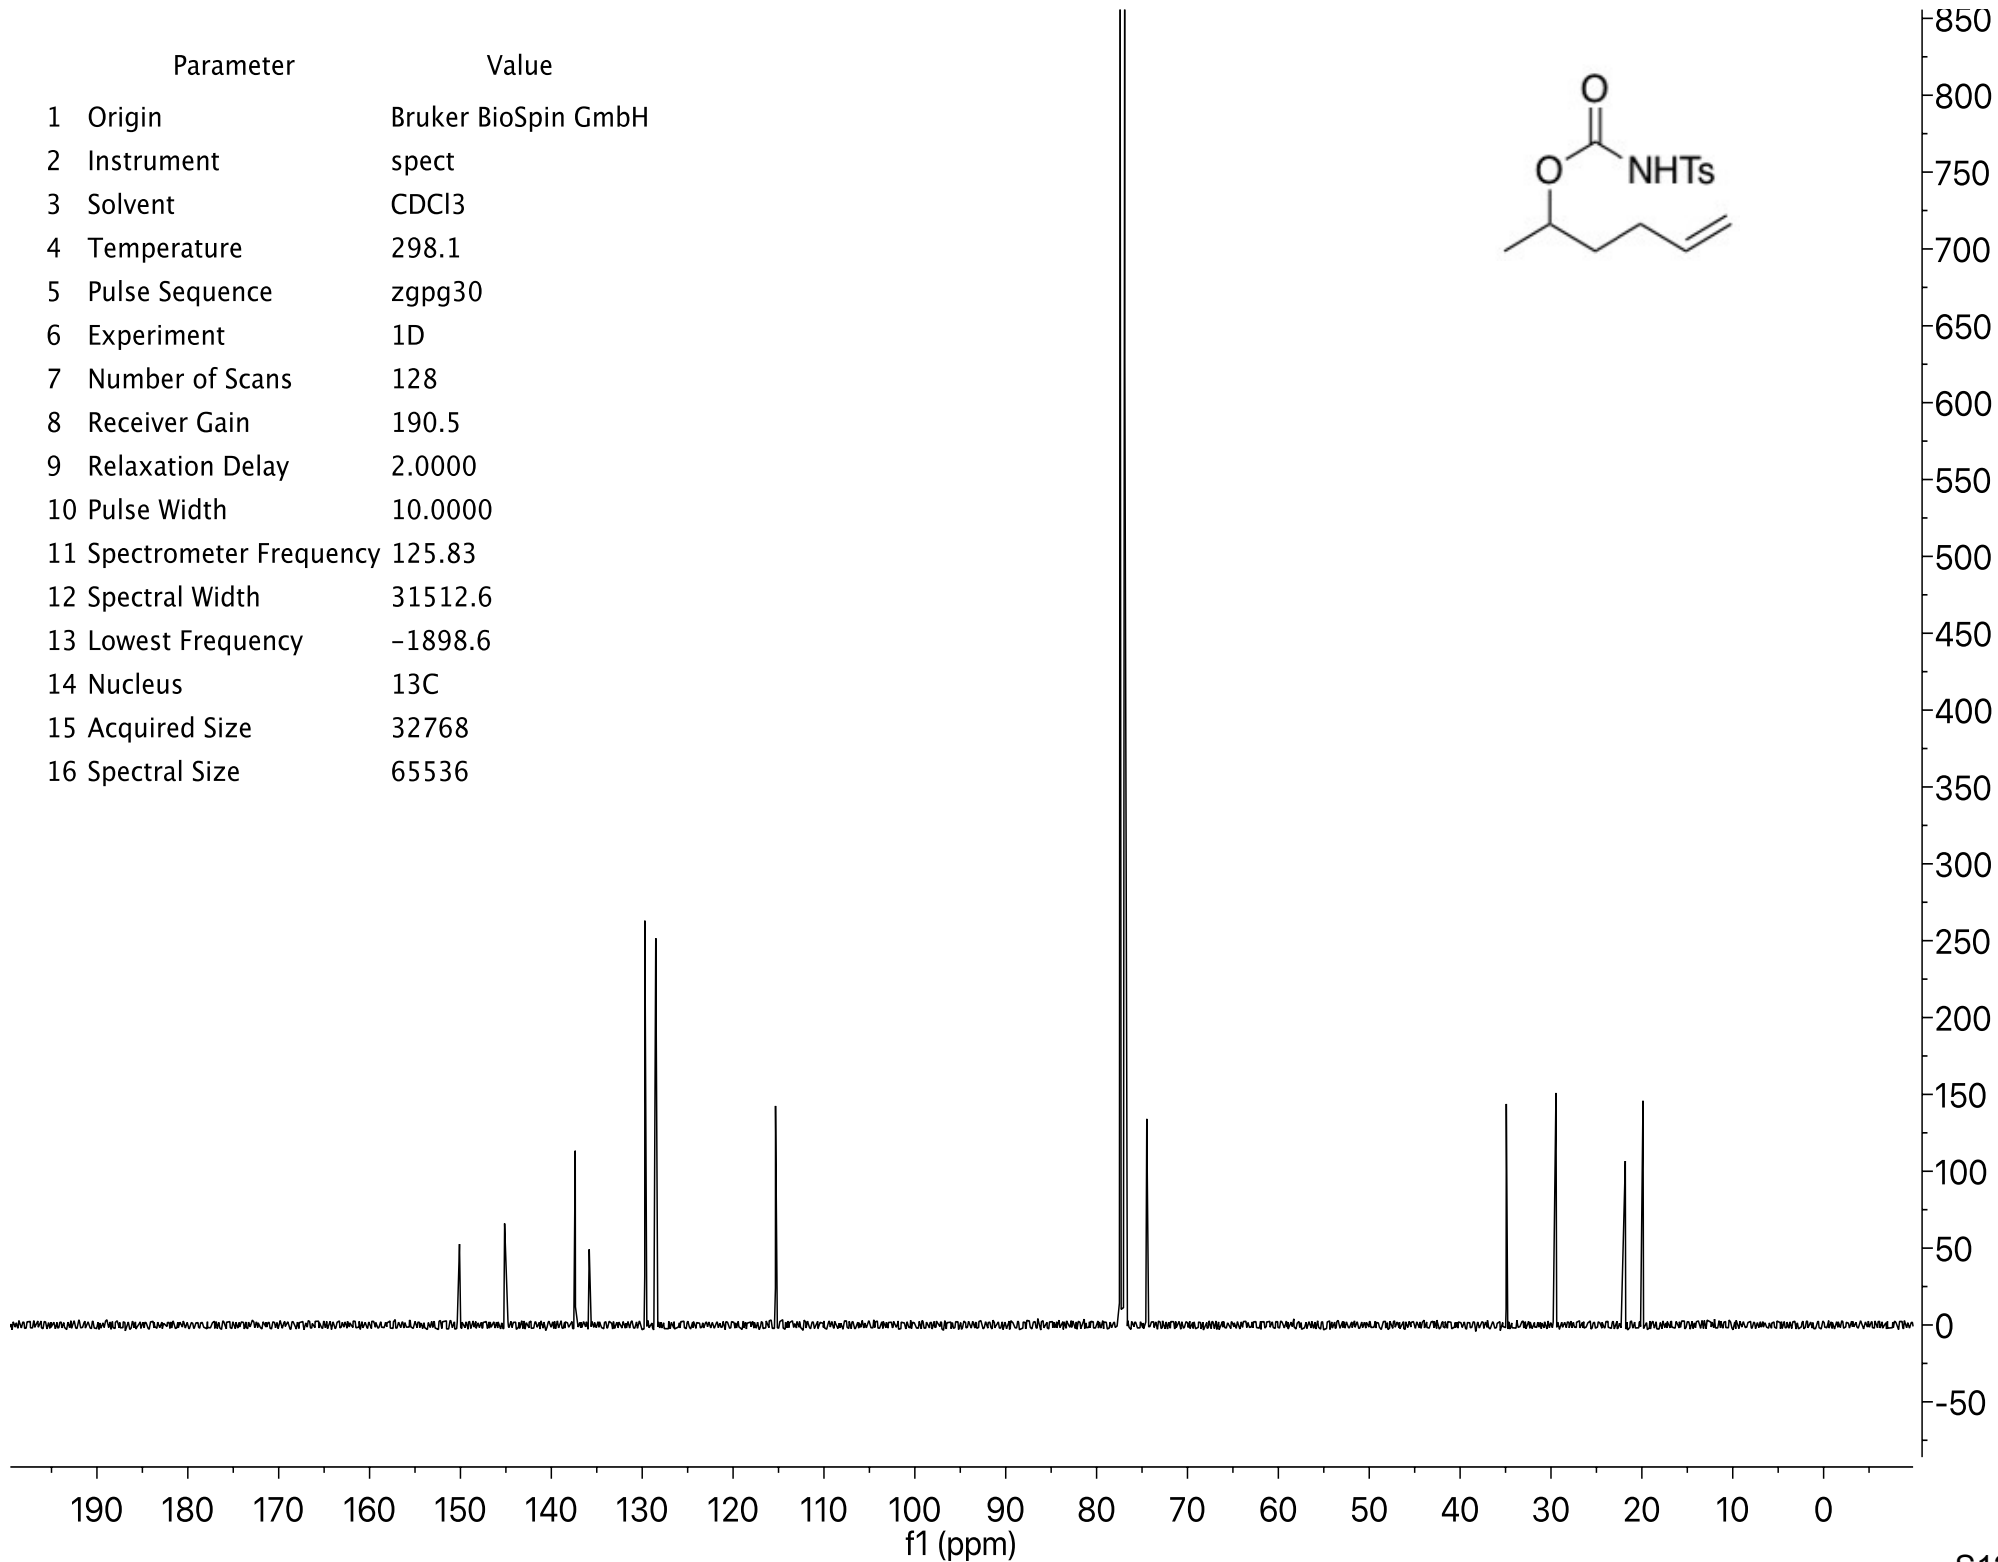

| Parameter                 | Value               |
|---------------------------|---------------------|
| 1 Origin                  | Bruker BioSpin GmbH |
| 2 Instrument              | spect               |
| 3 Solvent                 | CDCl3               |
| 4 Temperature             | 298.2               |
| 5 Pulse Sequence          | zg30                |
| 6 Experiment              | 1D                  |
| 7 Number of Scans         | 5                   |
| 8 Receiver Gain           | 190.5               |
| 9 Relaxation Delay        | 15.0000             |
| 10 Pulse Width            | 12.0000             |
| 11 Spectrometer Frequency | 500.35              |
| 12 Spectral Width         | 10000.0             |
| 13 Lowest Frequency       | -1922.2             |
| 14 Nucleus                | 1H                  |
| 15 Acquired Size          | 32768               |
| 16 Spectral Size          | 65536               |

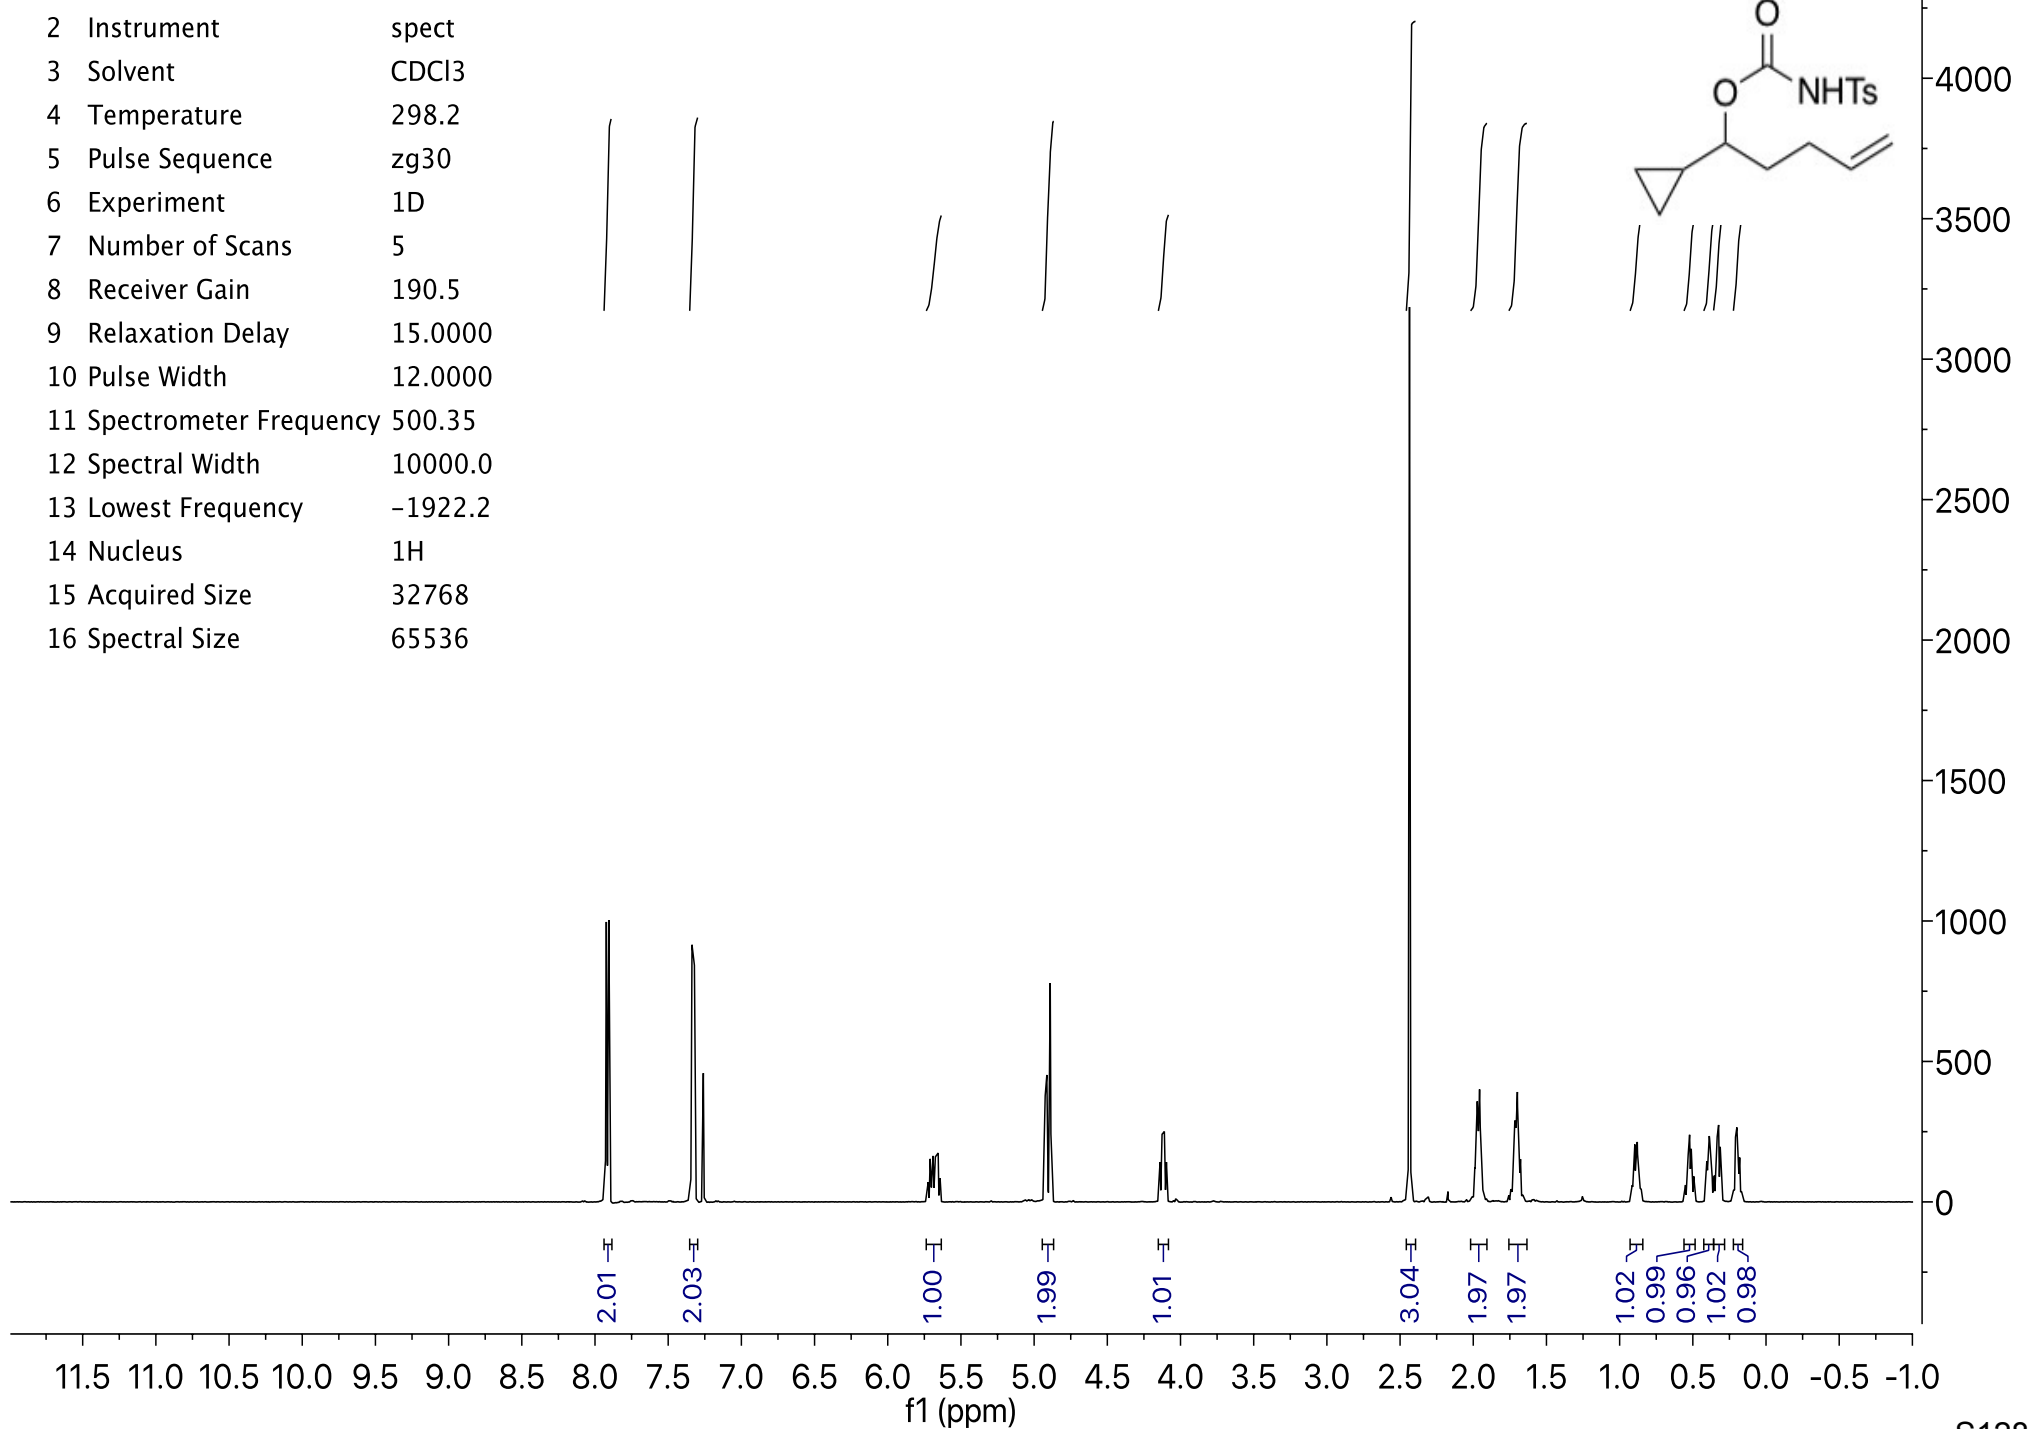

| Parameter                 | Value               |
|---------------------------|---------------------|
| 1 Origin                  | Bruker BioSpin GmbH |
| 2 Instrument              | spect               |
| 3 Solvent                 | CDCl3               |
| 4 Temperature             | 298.1               |
| 5 Pulse Sequence          | zgpg30              |
| 6 Experiment              | 1D                  |
| 7 Number of Scans         | 512                 |
| 8 Receiver Gain           | 190.5               |
| 9 Relaxation Delay        | 1.0000              |
| 10 Pulse Width            | 10.0000             |
| 11 Spectrometer Frequency | 125.83              |
| 12 Spectral Width         | 31512.6             |
| 13 Lowest Frequency       | -1901.6             |
| 14 Nucleus                | 13C                 |
| 15 Acquired Size          | 32768               |
| 16 Spectral Size          | 65536               |

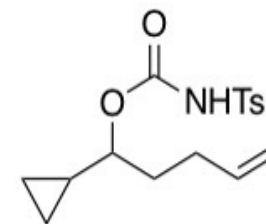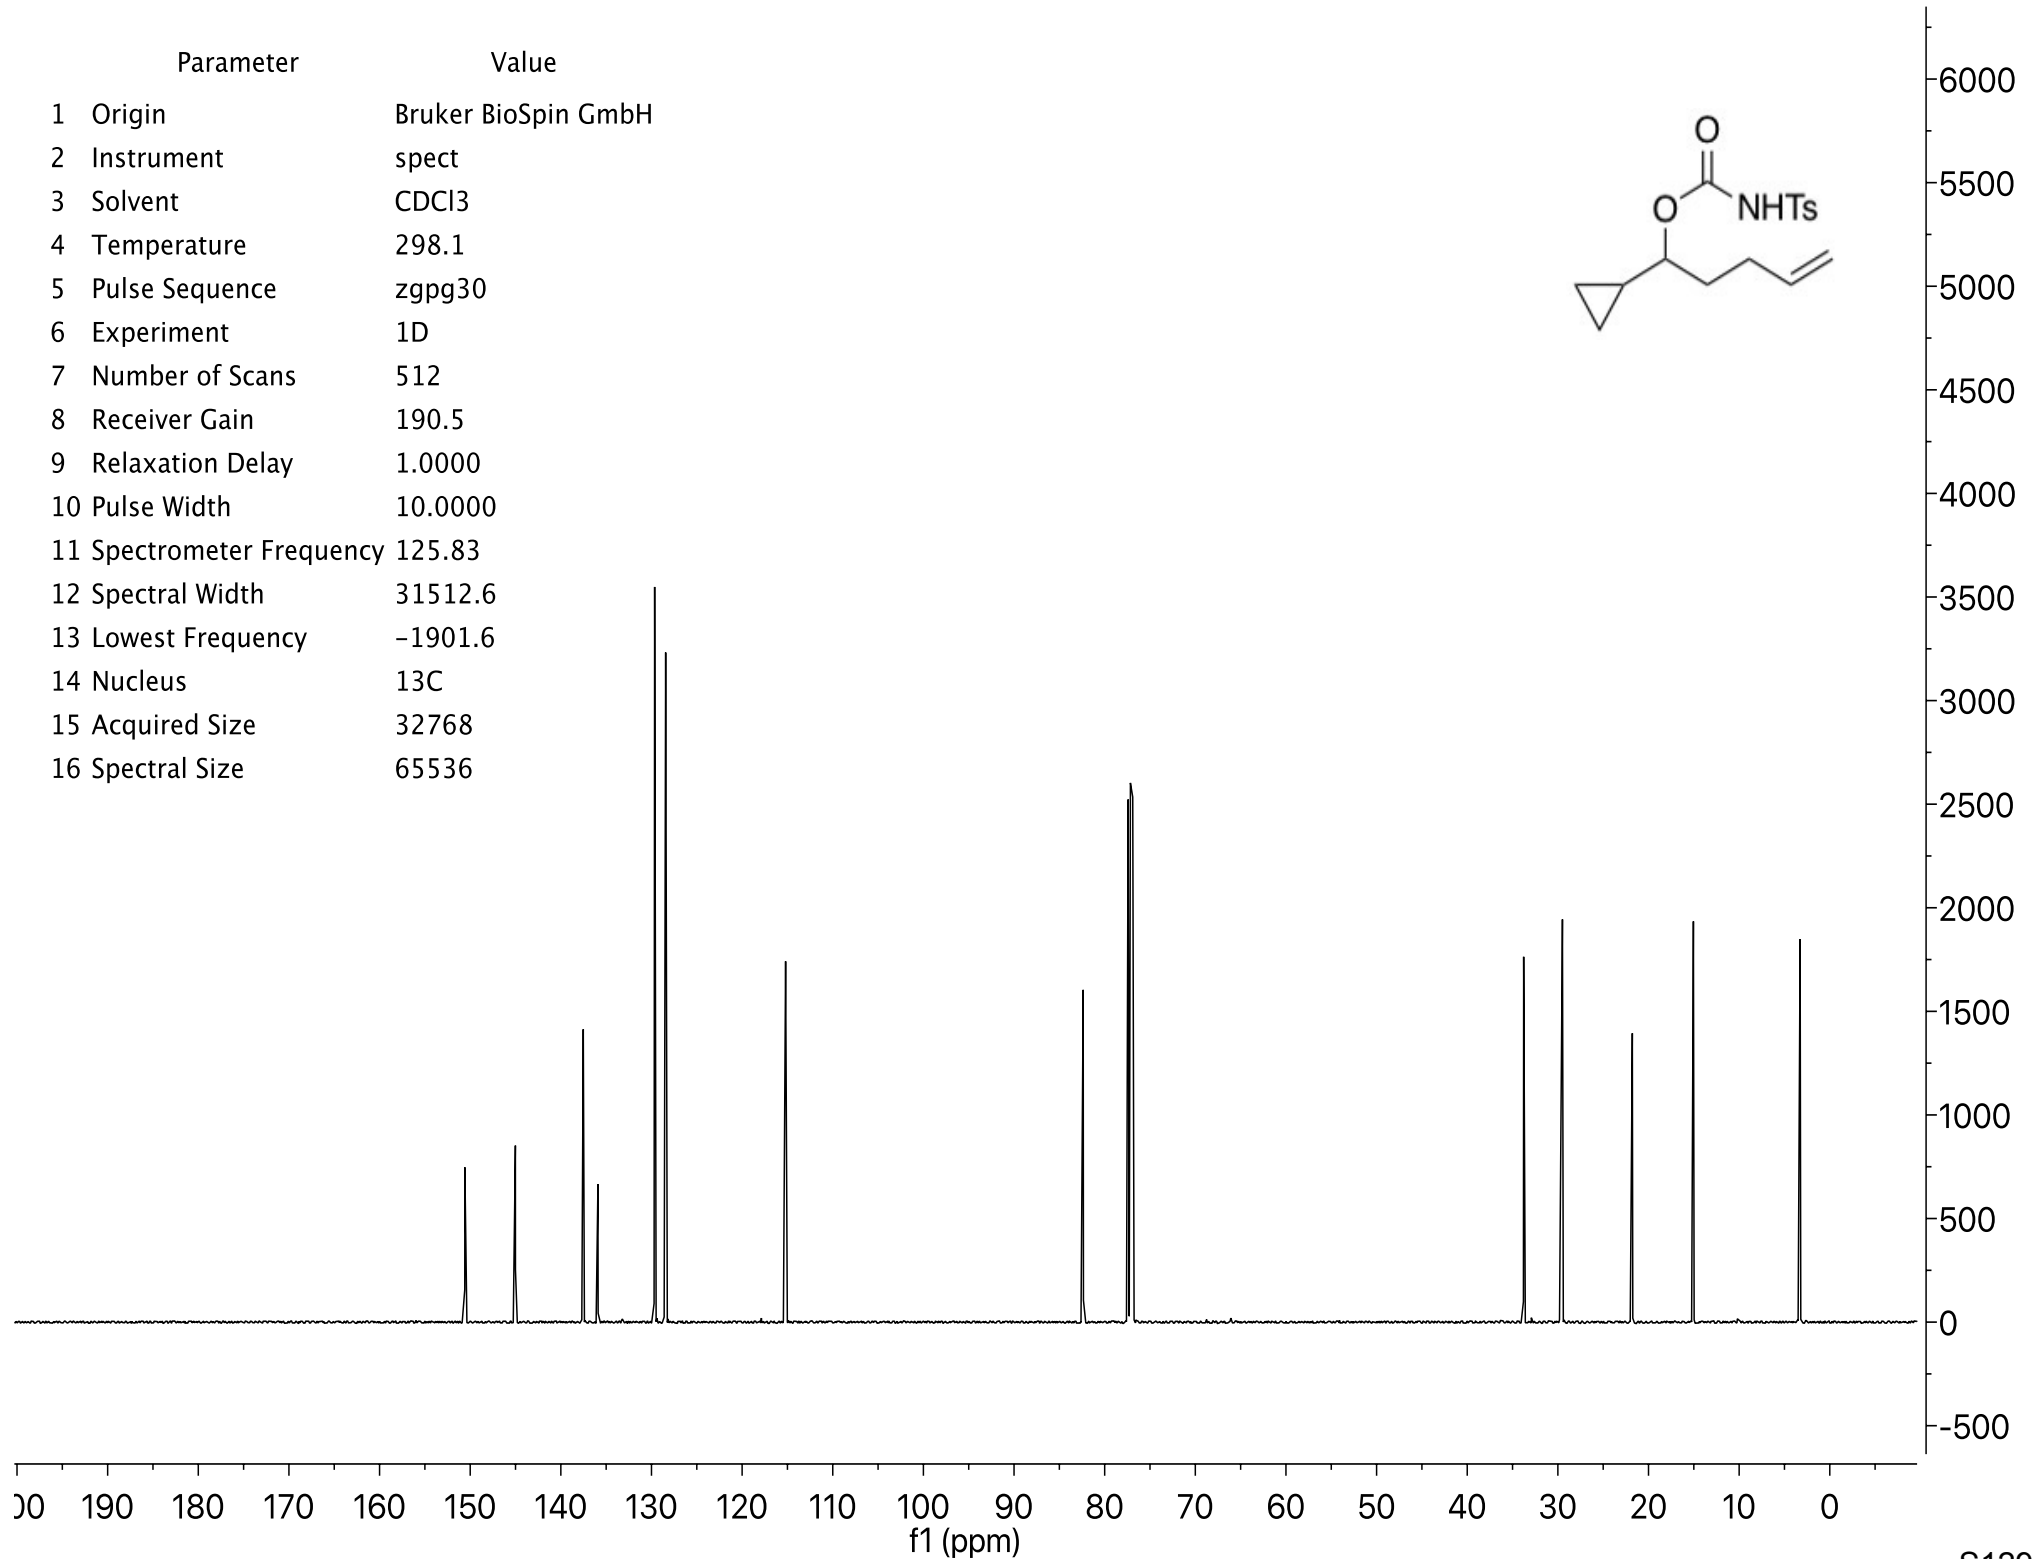

| Parameter                 | Value               |
|---------------------------|---------------------|
| 1 Origin                  | Bruker BioSpin GmbH |
| 2 Instrument              | spect               |
| 3 Solvent                 | CDCl3               |
| 4 Temperature             | 298.1               |
| 5 Pulse Sequence          | zg30                |
| 6 Experiment              | 1D                  |
| 7 Number of Scans         | 16                  |
| 8 Receiver Gain           | 190.5               |
| 9 Relaxation Delay        | 1.0000              |
| 10 Pulse Width            | 12.0000             |
| 11 Spectrometer Frequency | 500.35              |
| 12 Spectral Width         | 10000.0             |
| 13 Lowest Frequency       | -1920.3             |
| 14 Nucleus                | 1H                  |
| 15 Acquired Size          | 32768               |
| 16 Spectral Size          | 65536               |

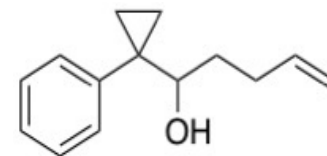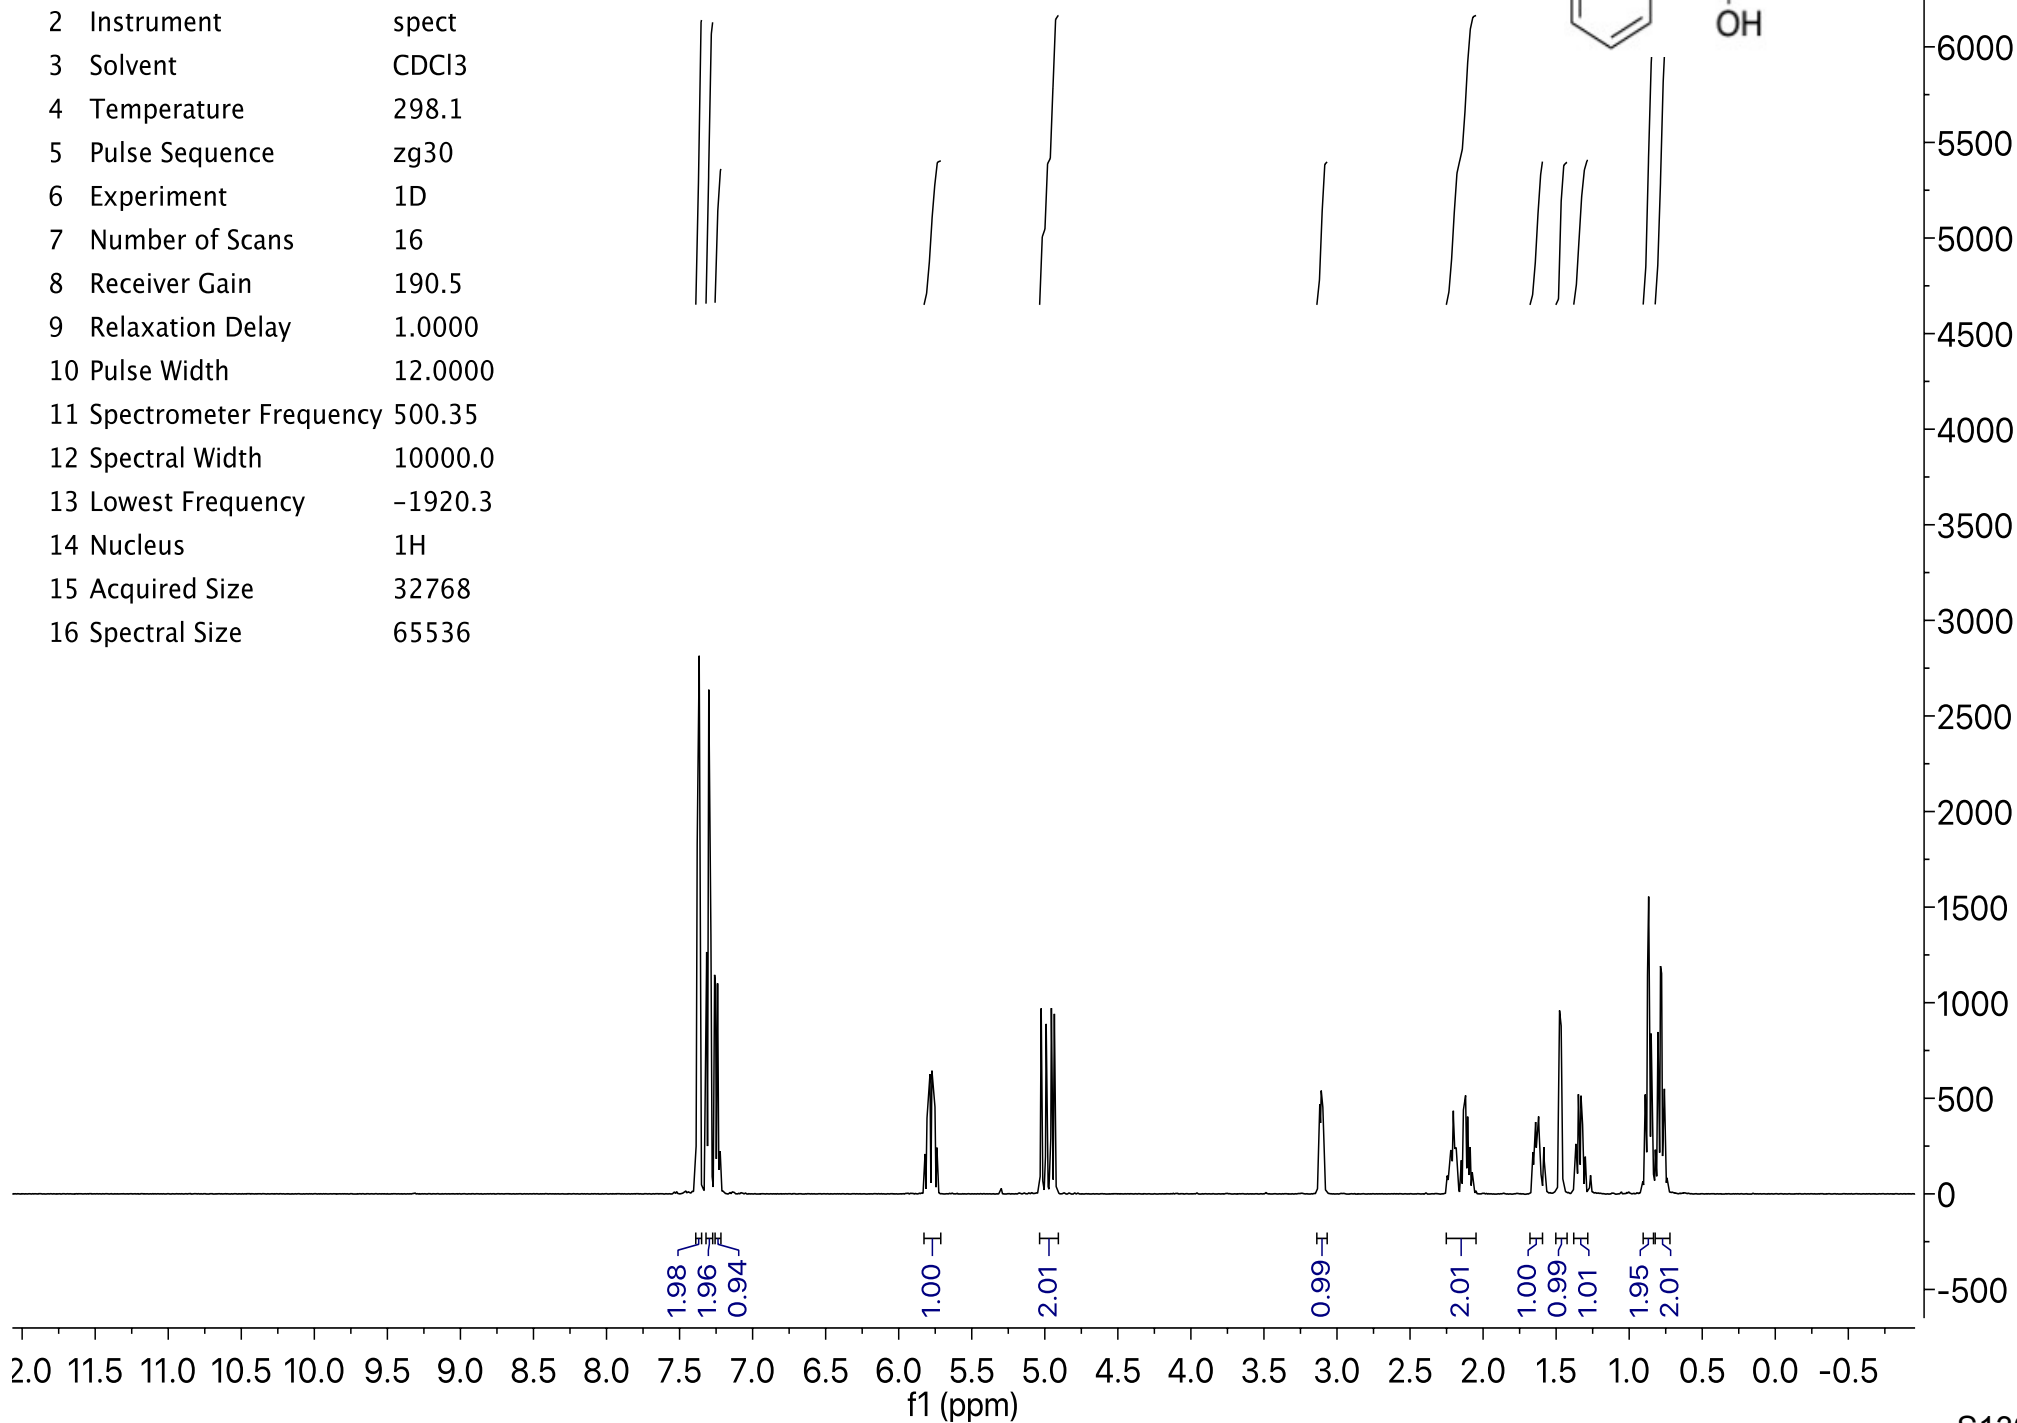

| Parameter                 | Value               |
|---------------------------|---------------------|
| 1 Origin                  | Bruker BioSpin GmbH |
| 2 Instrument              | spect               |
| 3 Solvent                 | CDCl3               |
| 4 Temperature             | 298.2               |
| 5 Pulse Sequence          | zgpg30              |
| 6 Experiment              | 1D                  |
| 7 Number of Scans         | 128                 |
| 8 Receiver Gain           | 190.5               |
| 9 Relaxation Delay        | 2.0000              |
| 10 Pulse Width            | 10.0000             |
| 11 Spectrometer Frequency | 125.83              |
| 12 Spectral Width         | 31512.6             |
| 13 Lowest Frequency       | -1899.2             |
| 14 Nucleus                | 13C                 |
| 15 Acquired Size          | 32768               |
| 16 Spectral Size          | 65536               |

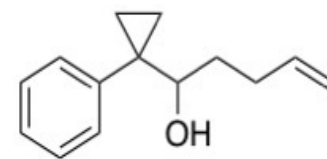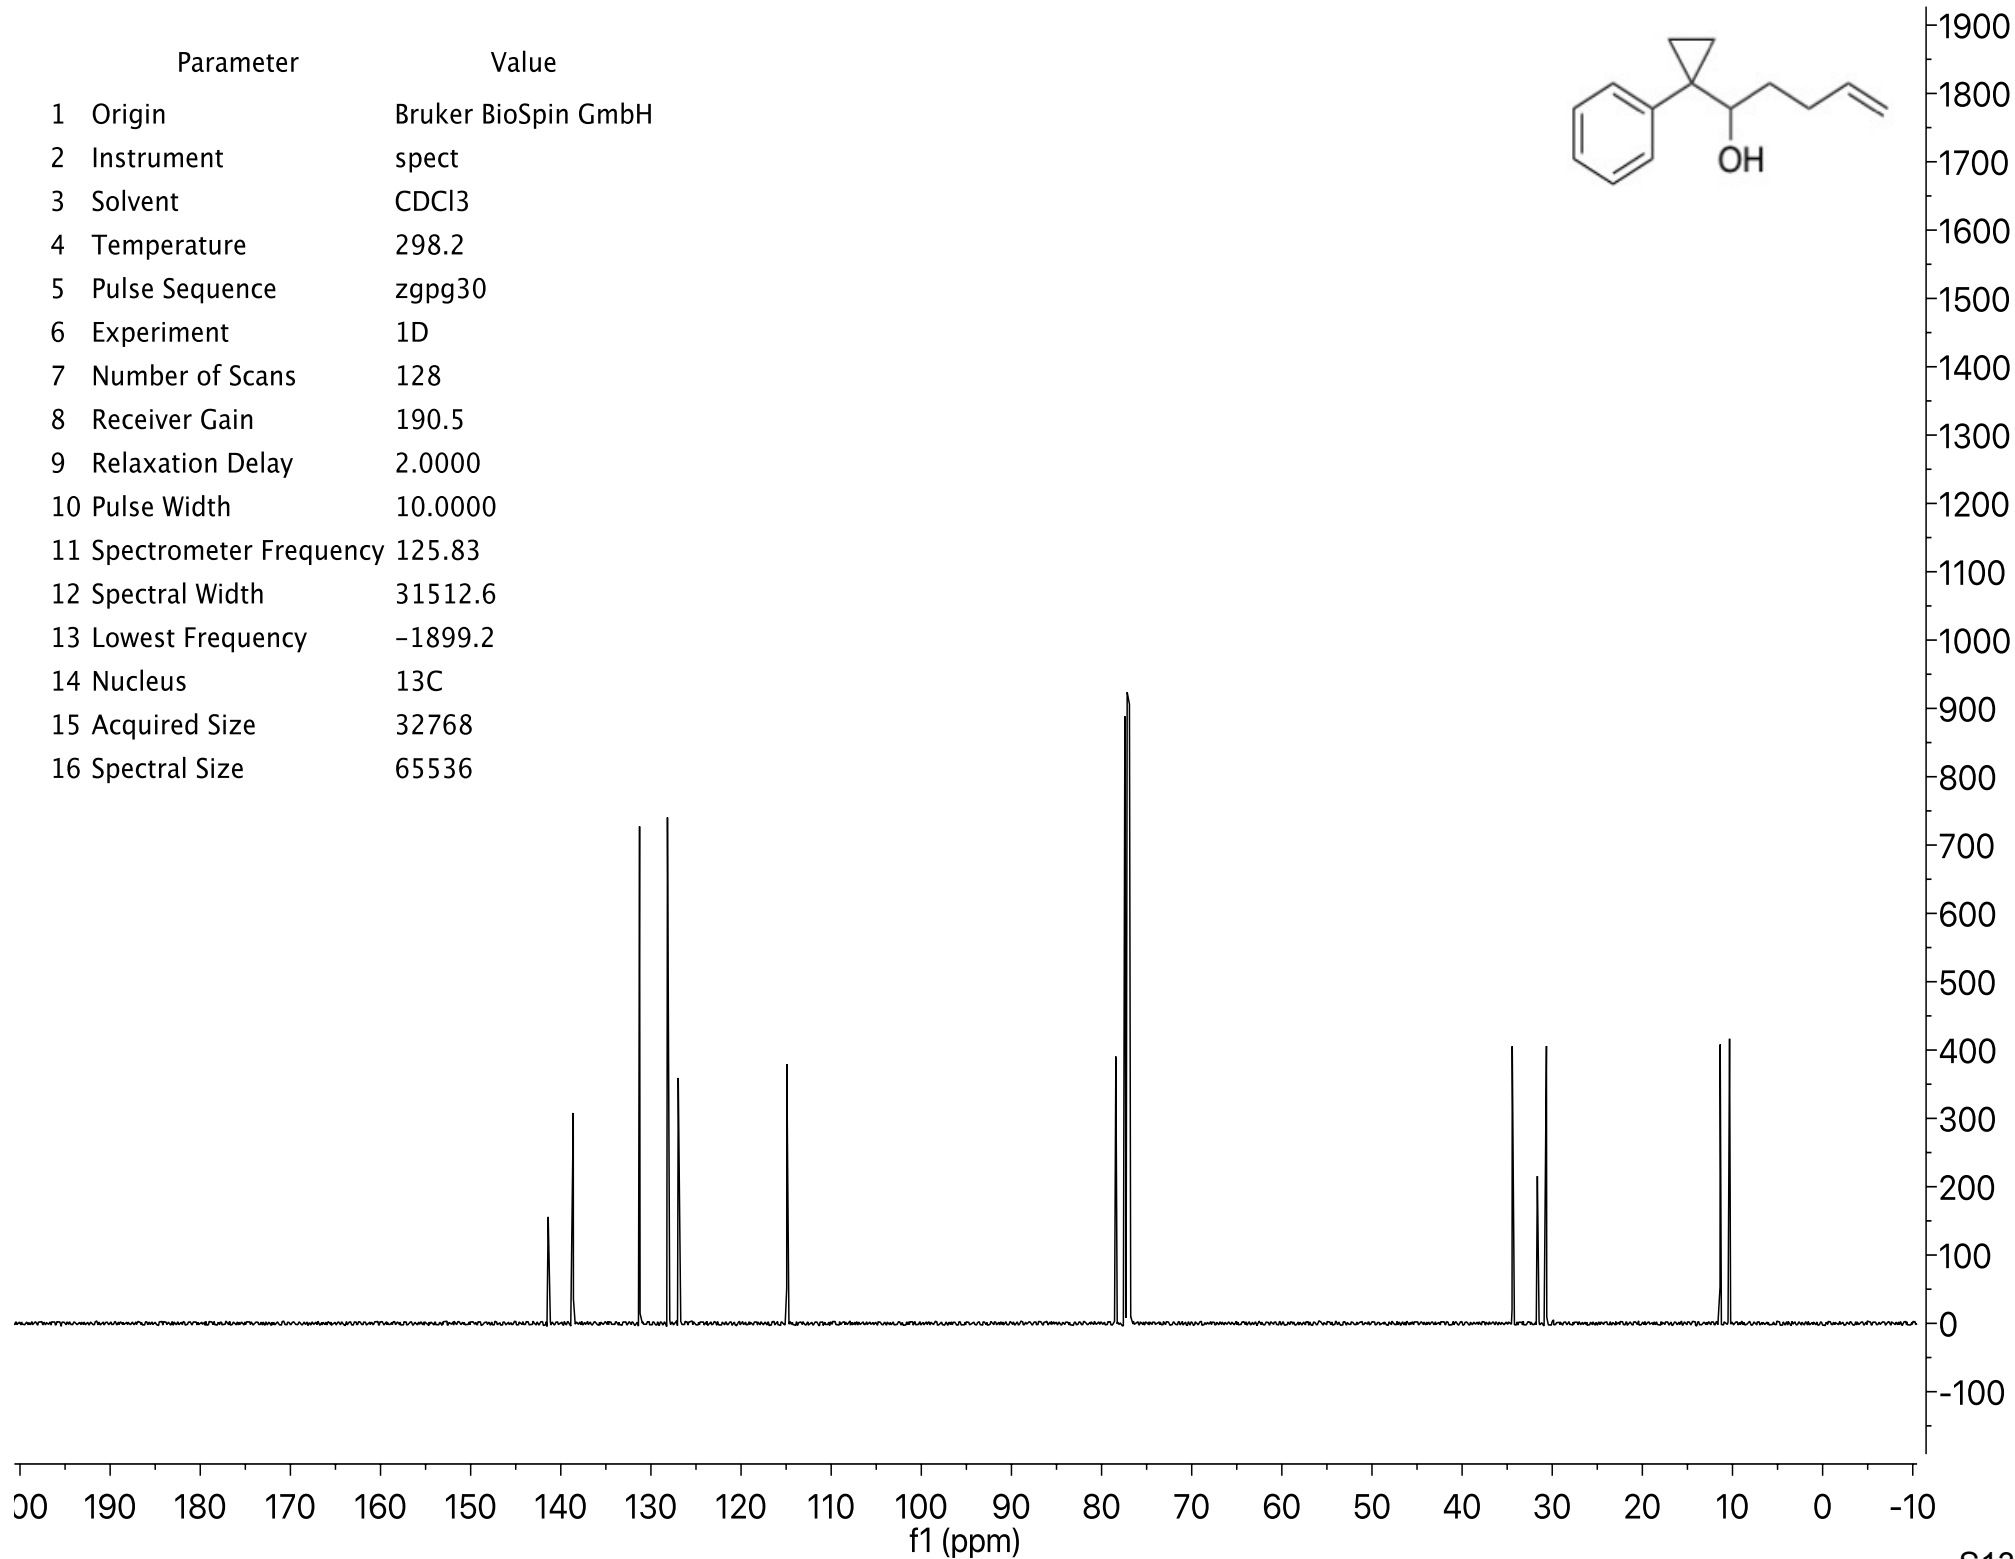

| Parameter                 | Value               |
|---------------------------|---------------------|
| 1 Origin                  | Bruker BioSpin GmbH |
| 2 Instrument              | spect               |
| 3 Solvent                 | CDCl3               |
| 4 Temperature             | 298.1               |
| 5 Pulse Sequence          | zg30                |
| 6 Experiment              | 1D                  |
| 7 Number of Scans         | 32                  |
| 8 Receiver Gain           | 76.2                |
| 9 Relaxation Delay        | 1.0000              |
| 10 Pulse Width            | 12.0000             |
| 11 Spectrometer Frequency | 500.35              |
| 12 Spectral Width         | 10000.0             |
| 13 Lowest Frequency       | -1922.3             |
| 14 Nucleus                | 1H                  |
| 15 Acquired Size          | 32768               |
| 16 Spectral Size          | 65536               |

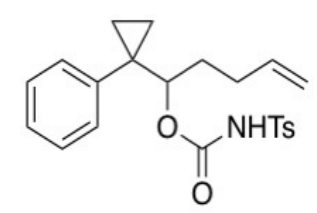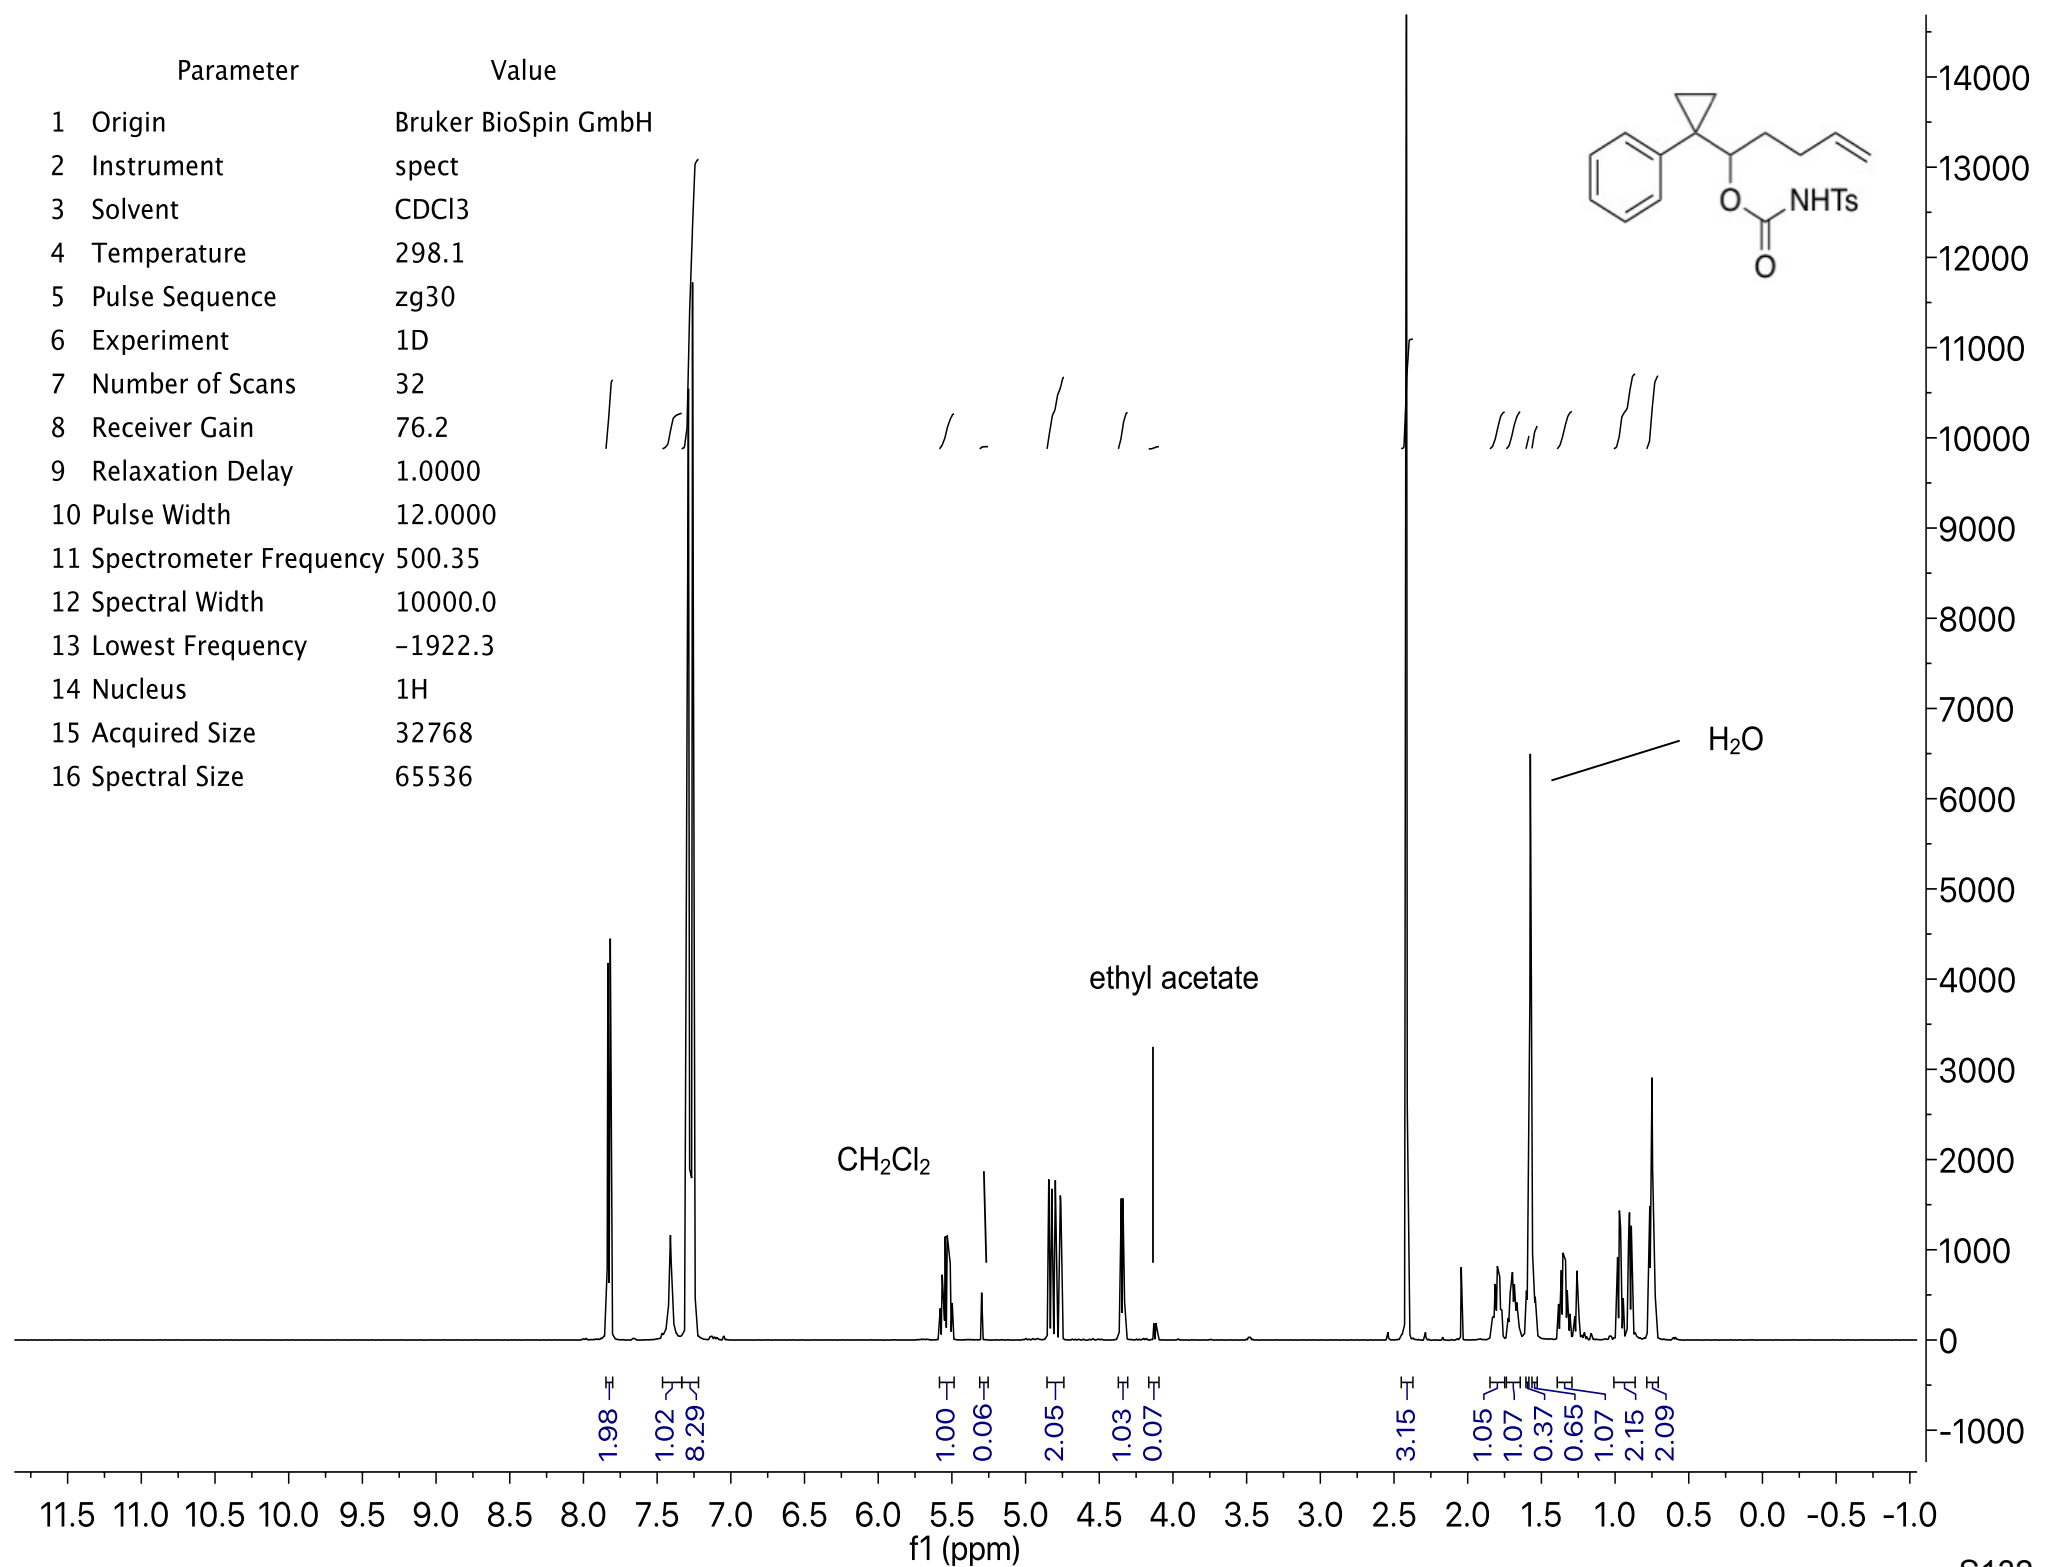

| Parameter                 | Value               |
|---------------------------|---------------------|
| 1 Origin                  | Bruker BioSpin GmbH |
| 2 Instrument              | spect               |
| 3 Solvent                 | CDCl3               |
| 4 Temperature             | 298.2               |
| 5 Pulse Sequence          | zgpg30              |
| 6 Experiment              | 1D                  |
| 7 Number of Scans         | 312                 |
| 8 Receiver Gain           | 190.5               |
| 9 Relaxation Delay        | 2.0000              |
| 10 Pulse Width            | 10.0000             |
| 11 Spectrometer Frequency | 125.83              |
| 12 Spectral Width         | 31512.6             |
| 13 Lowest Frequency       | -1898.2             |
| 14 Nucleus                | 13C                 |
| 15 Acquired Size          | 32768               |
| 16 Spectral Size          | 65536               |

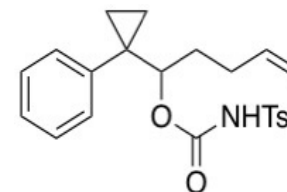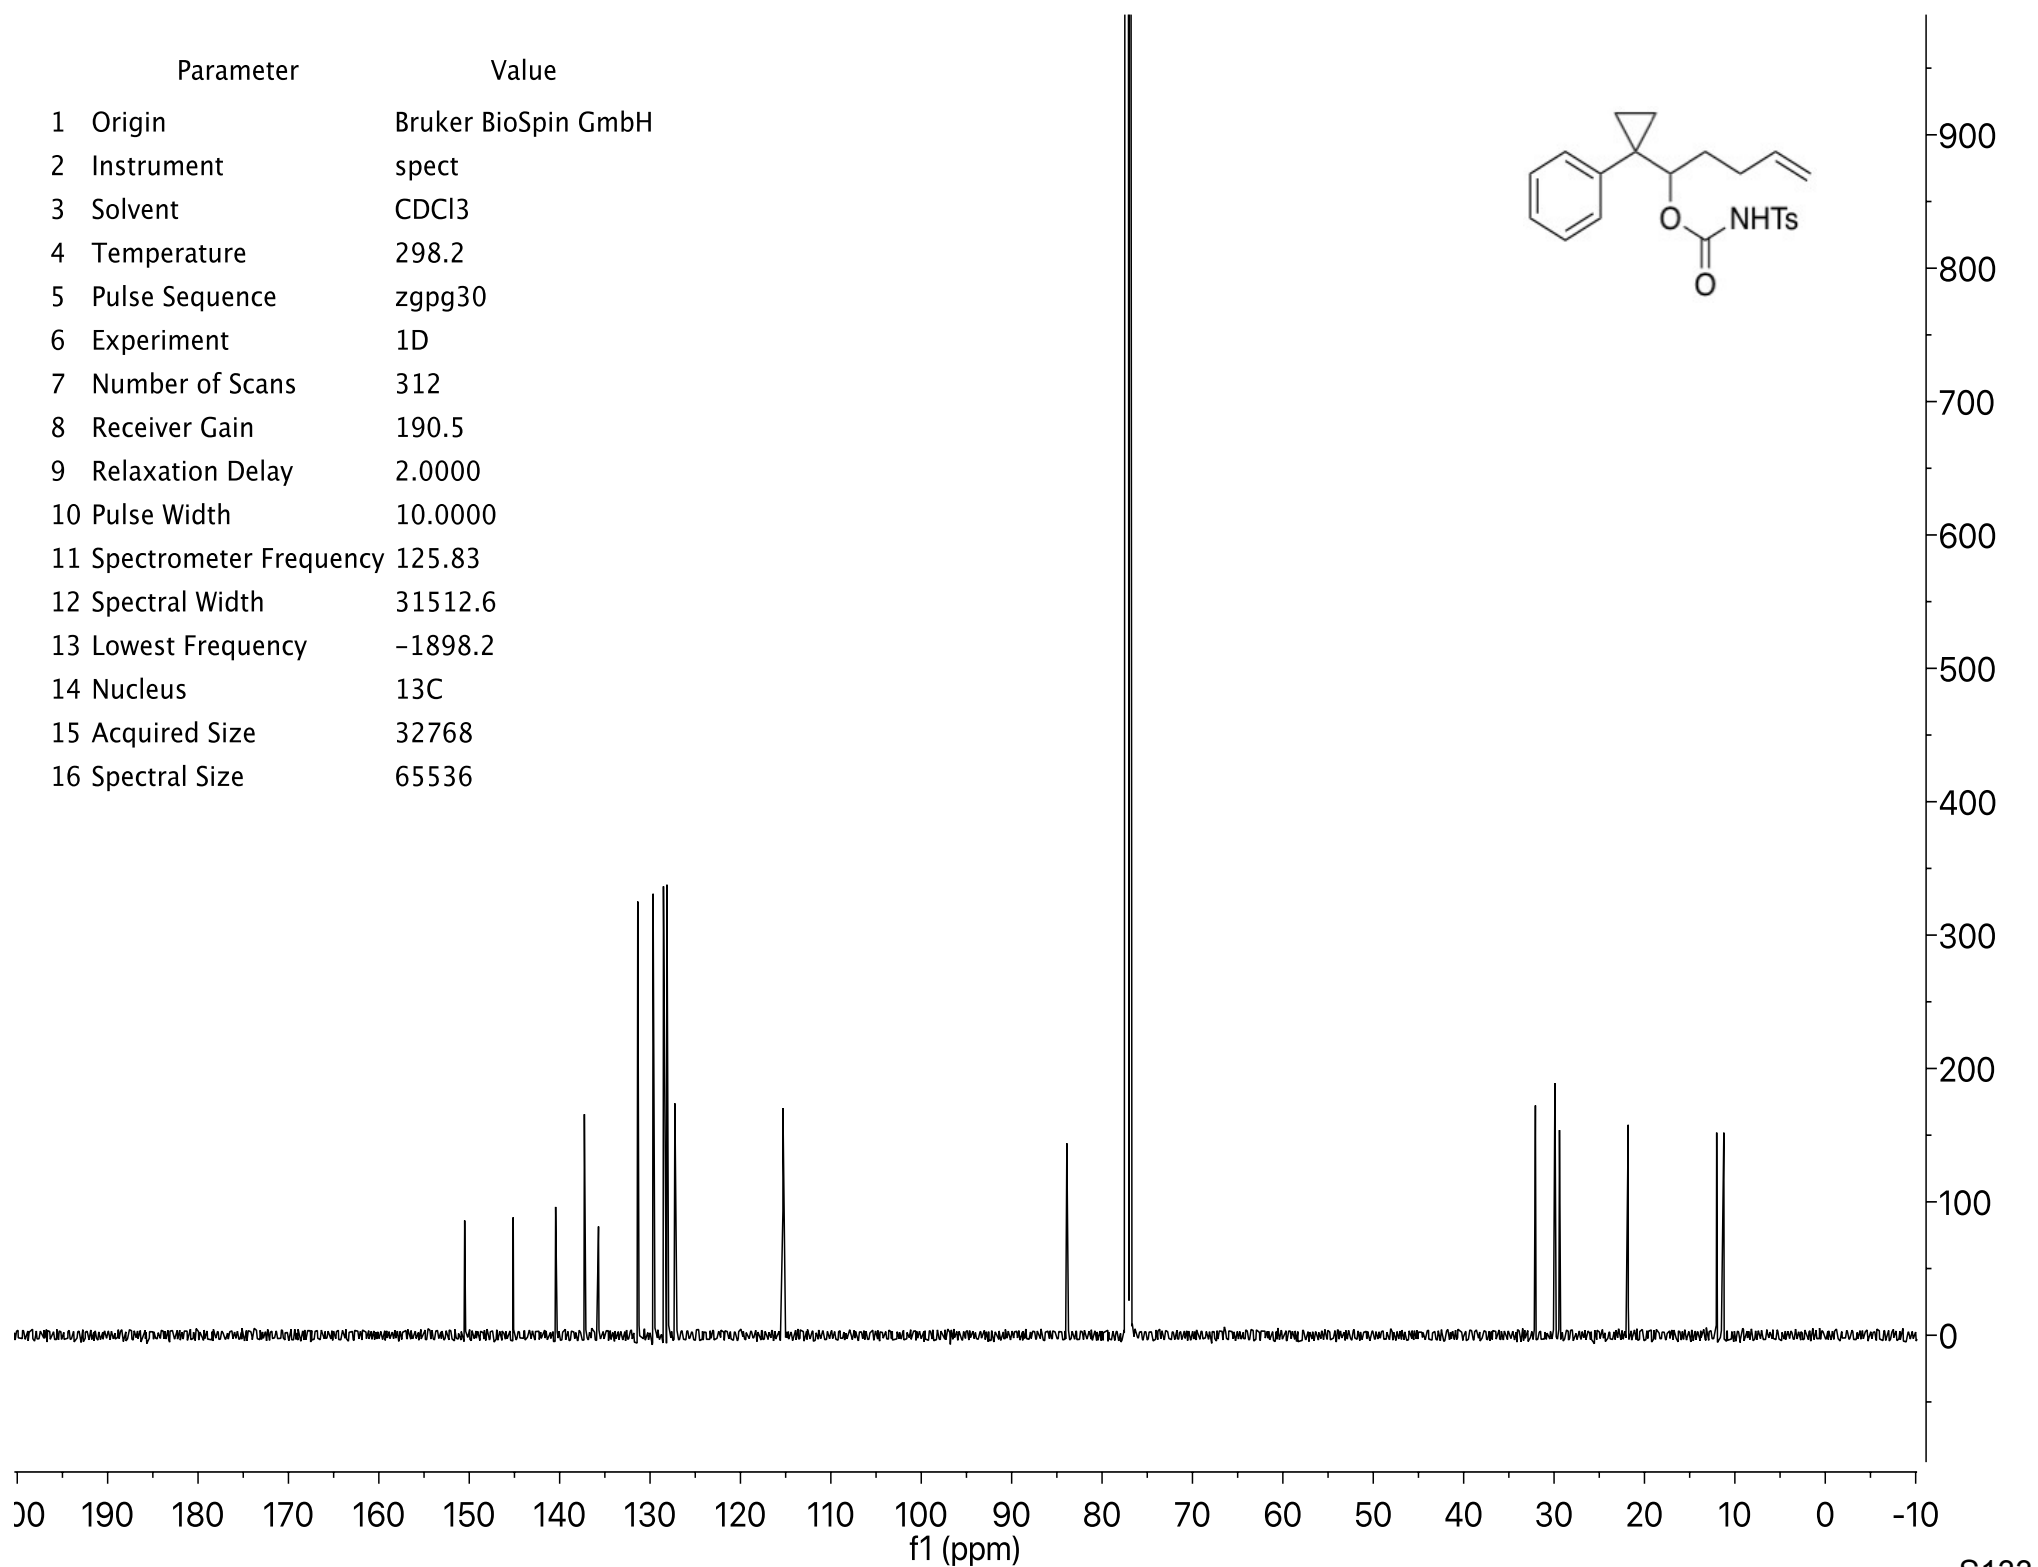

| Parameter                 | Value               |
|---------------------------|---------------------|
| 1 Origin                  | Bruker BioSpin GmbH |
| 2 Instrument              | spect               |
| 3 Solvent                 | CDCl3               |
| 4 Temperature             | 298.1               |
| 5 Pulse Sequence          | zg30                |
| 6 Experiment              | 1D                  |
| 7 Number of Scans         | 32                  |
| 8 Receiver Gain           | 76.2                |
| 9 Relaxation Delay        | 1.0000              |
| 10 Pulse Width            | 12.0000             |
| 11 Spectrometer Frequency | 500.35              |
| 12 Spectral Width         | 10000.0             |
| 13 Lowest Frequency       | -1922.3             |
| 14 Nucleus                | 1H                  |
| 15 Acquired Size          | 32768               |
| 16 Spectral Size          | 65536               |

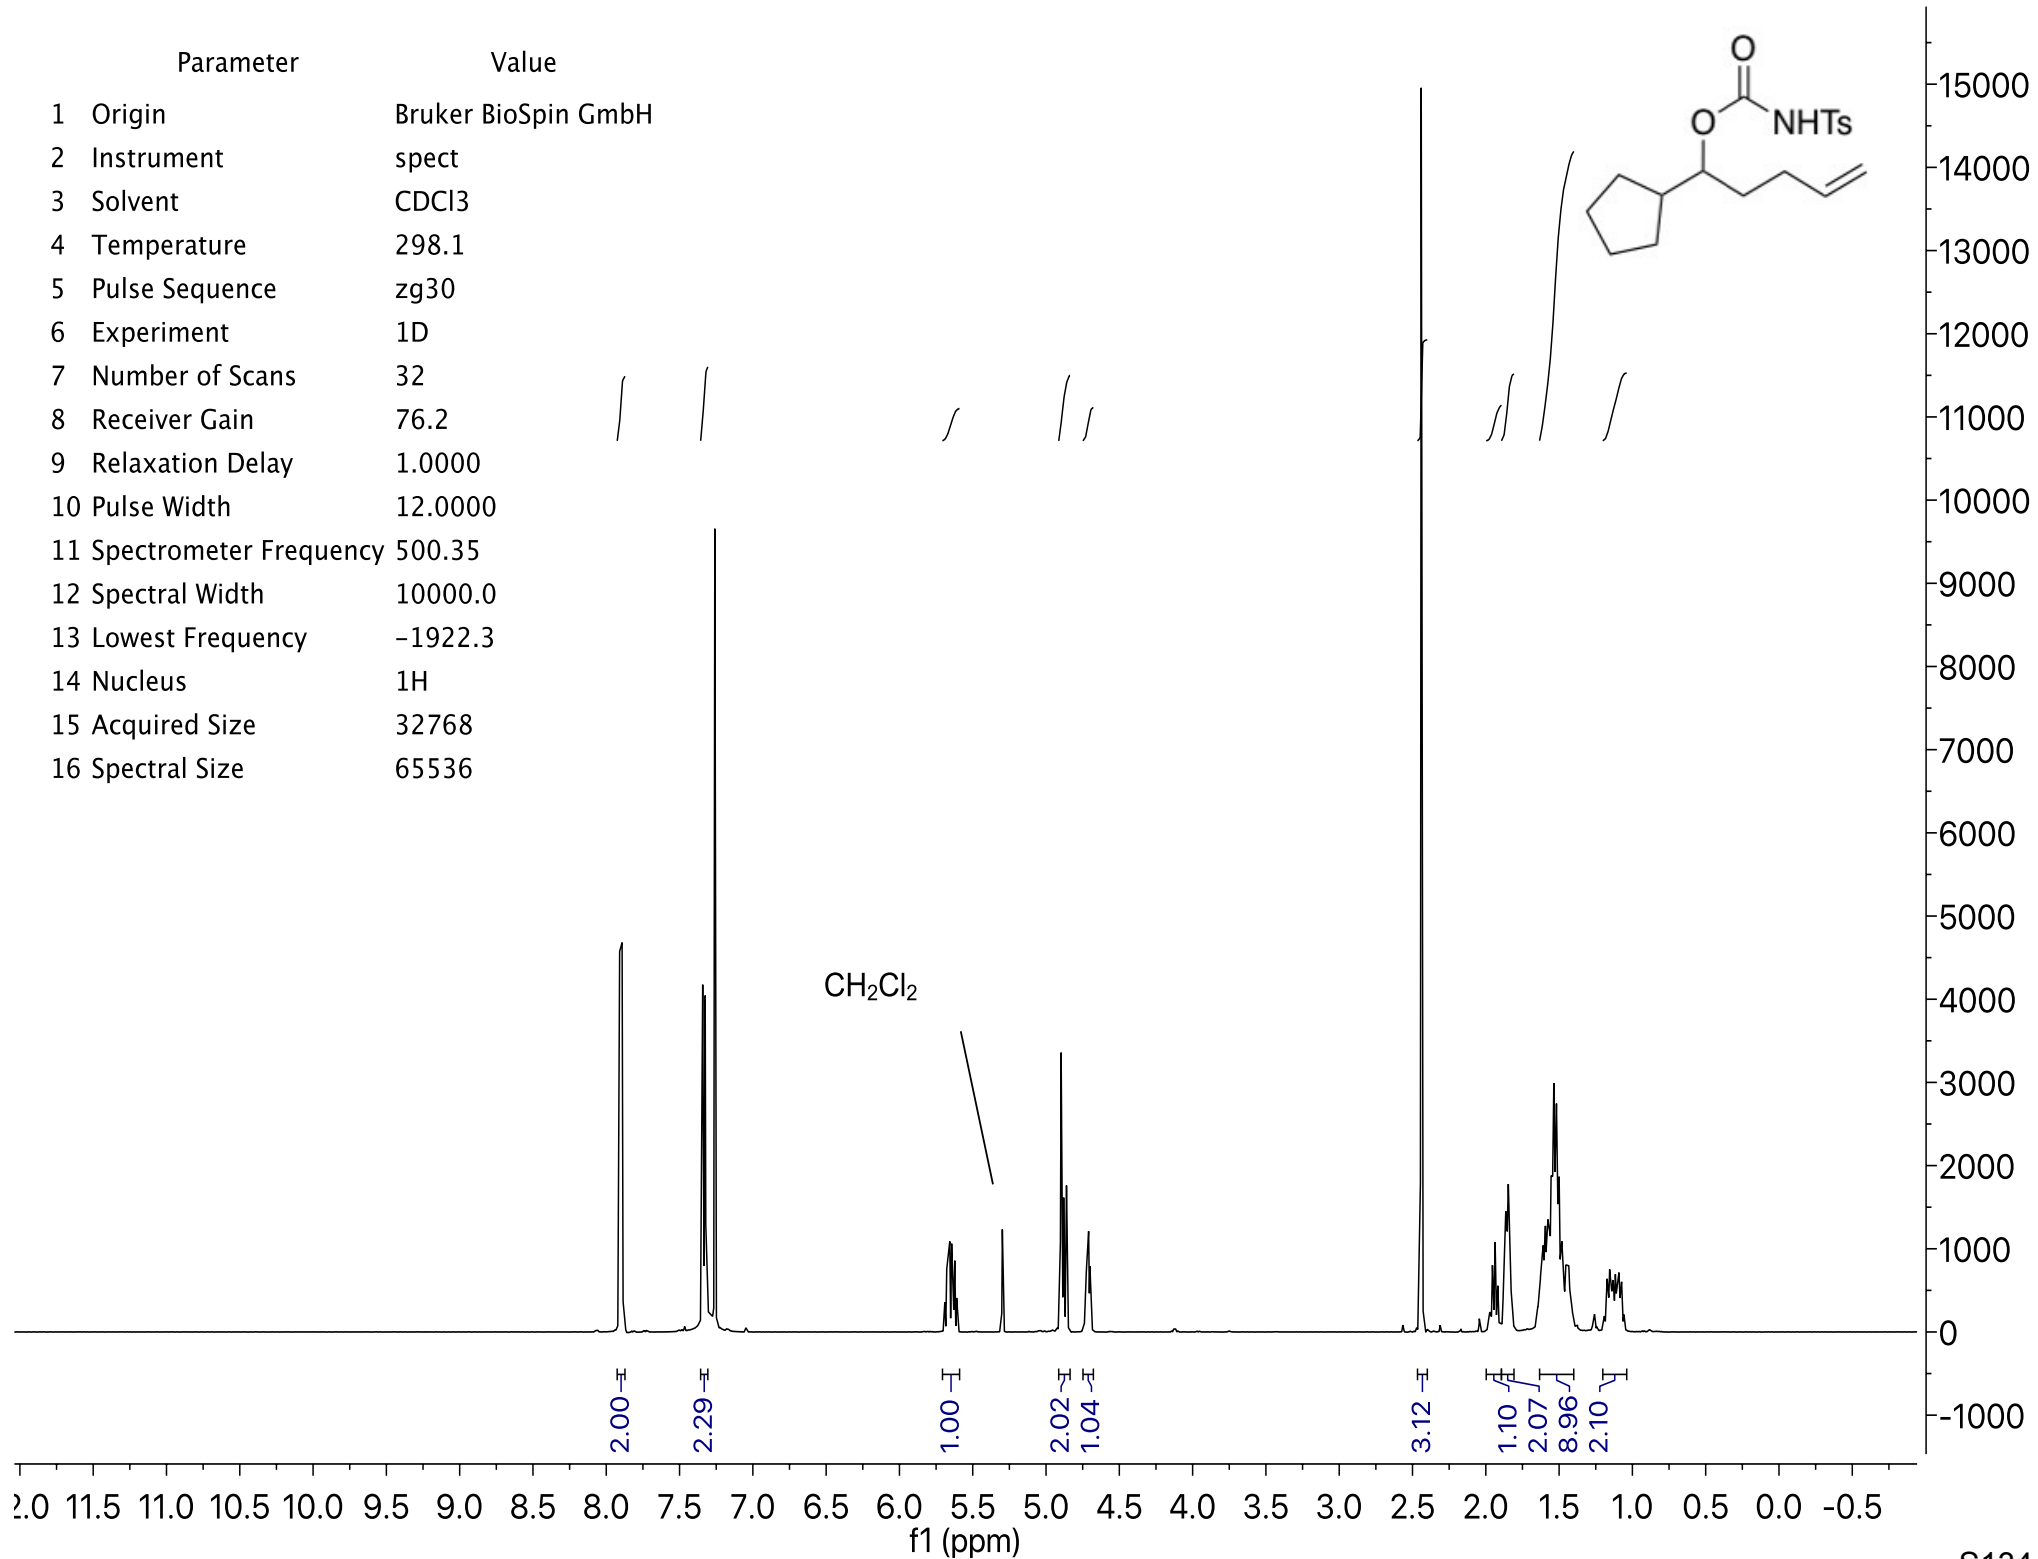



| Parameter                 | Value               |
|---------------------------|---------------------|
| 1 Origin                  | Bruker BioSpin GmbH |
| 2 Instrument              | spect               |
| 3 Solvent                 | CDCl3               |
| 4 Temperature             | 298.2               |
| 5 Pulse Sequence          | zgpg30              |
| 6 Experiment              | 1D                  |
| 7 Number of Scans         | 512                 |
| 8 Receiver Gain           | 190.5               |
| 9 Relaxation Delay        | 2.0000              |
| 10 Pulse Width            | 10.0000             |
| 11 Spectrometer Frequency | 125.83              |
| 12 Spectral Width         | 31512.6             |
| 13 Lowest Frequency       | -1897.9             |
| 14 Nucleus                | 13C                 |
| 15 Acquired Size          | 32768               |
| 16 Spectral Size          | 65536               |

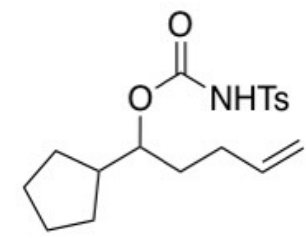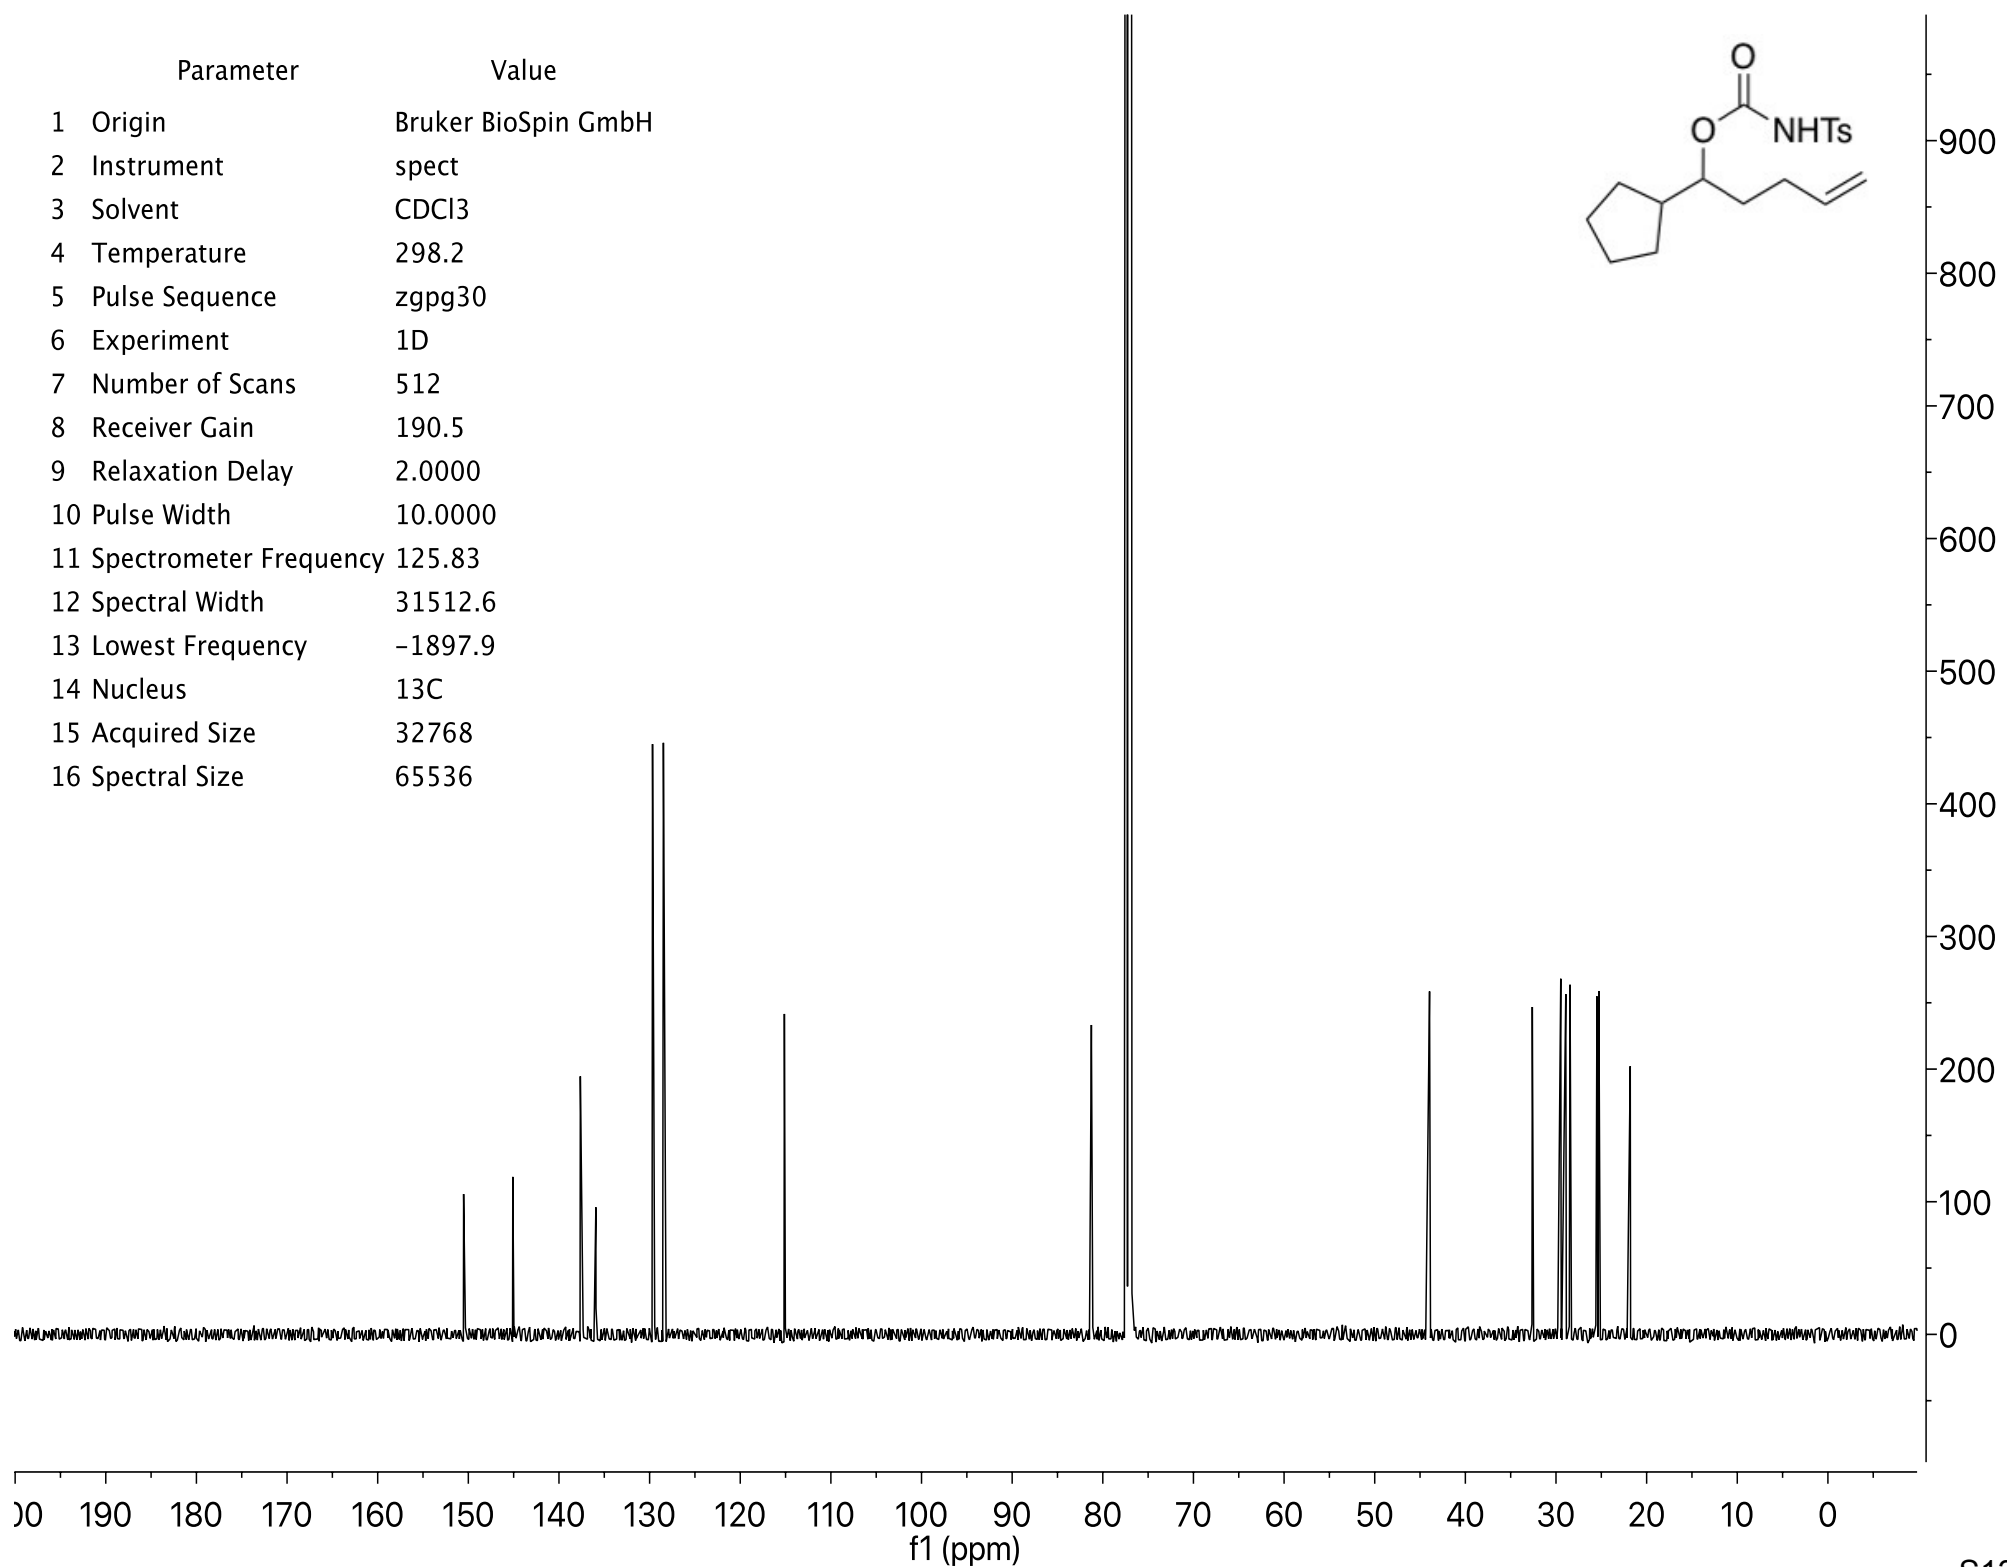

| Parameter                 | Value               |
|---------------------------|---------------------|
| 1 Origin                  | Bruker BioSpin GmbH |
| 2 Spectrometer            | spect               |
| 3 Solvent                 | CDCl3               |
| 4 Temperature             | 298.1               |
| 5 Pulse Sequence          | zg30                |
| 6 Experiment              | 1D                  |
| 7 Number of Scans         | 8                   |
| 8 Receiver Gain           | 94                  |
| 9 Relaxation Delay        | 15.0000             |
| 10 Pulse Width            | 12.0000             |
| 11 Spectrometer Frequency | 500.35              |
| 12 Spectral Width         | 10000.0             |
| 13 Lowest Frequency       | -1921.8             |
| 14 Nucleus                | 1H                  |
| 15 Acquired Size          | 32768               |
| 16 Spectral Size          | 65536               |

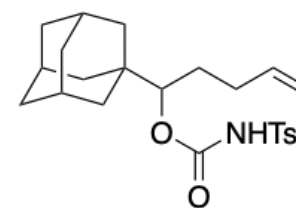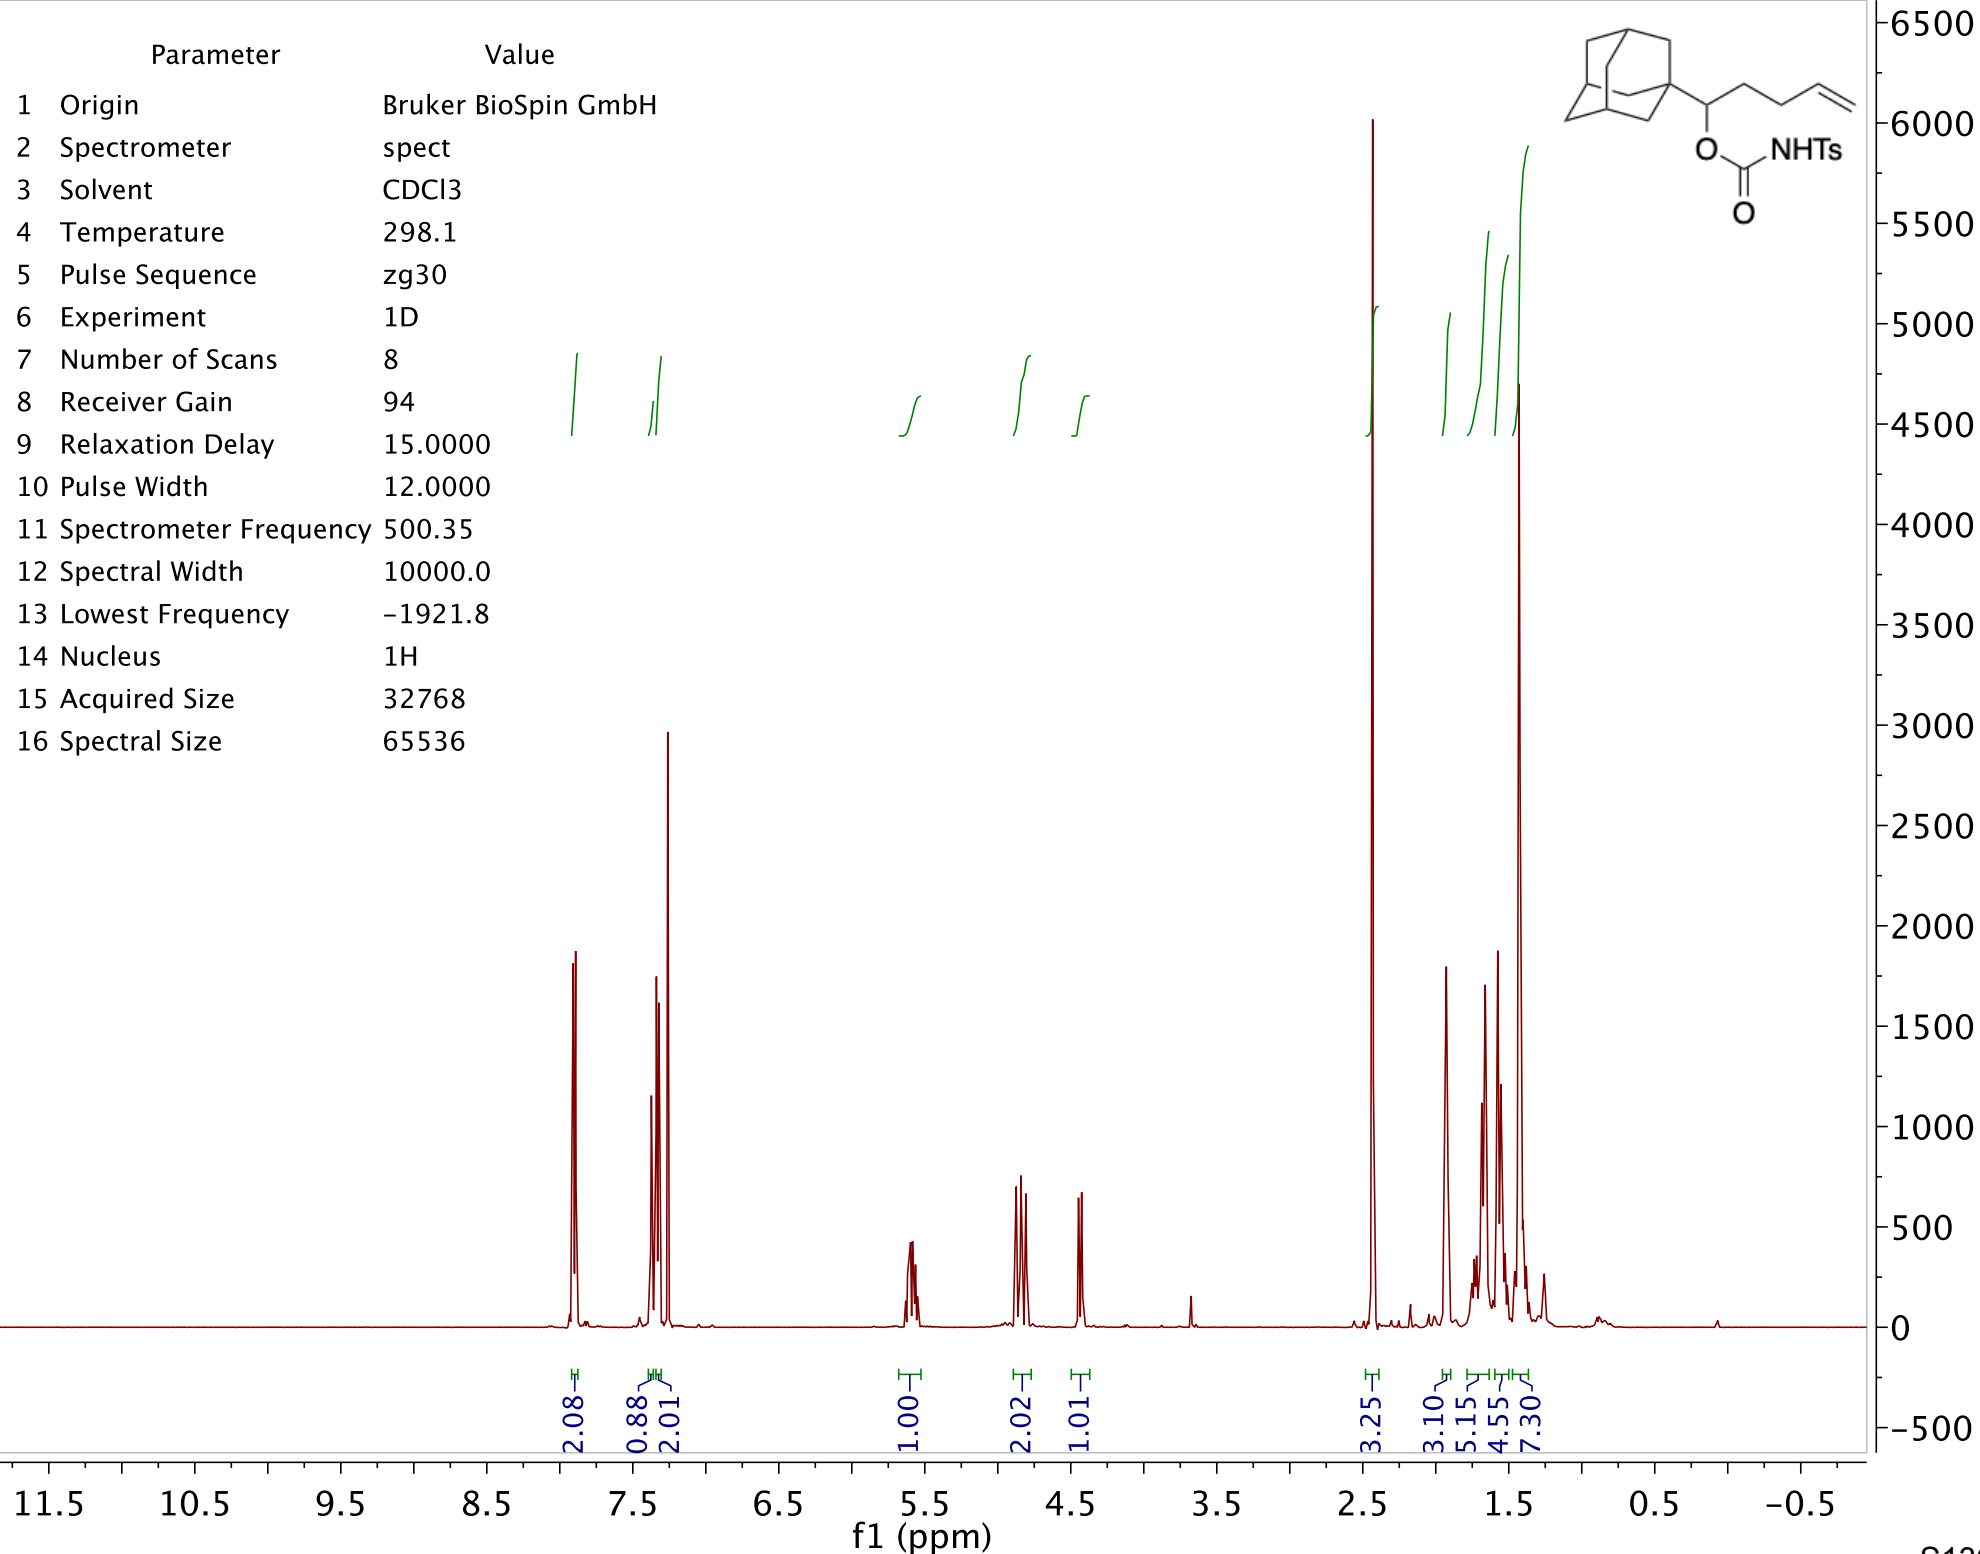

| Parameter                 | Value               |
|---------------------------|---------------------|
| 1 Origin                  | Bruker BioSpin GmbH |
| 2 Spectrometer            | spect               |
| 3 Solvent                 | CDCl3               |
| 4 Temperature             | 298.2               |
| 5 Pulse Sequence          | zgpg30              |
| 6 Experiment              | 1D                  |
| 7 Number of Scans         | 512                 |
| 8 Receiver Gain           | 191                 |
| 9 Relaxation Delay        | 1.0000              |
| 10 Pulse Width            | 10.0000             |
| 11 Spectrometer Frequency | 125.83              |
| 12 Spectral Width         | 31512.6             |
| 13 Lowest Frequency       | -1898.2             |
| 14 Nucleus                | <sup>13</sup> C     |
| 15 Acquired Size          | 32768               |
| 16 Spectral Size          | 65536               |

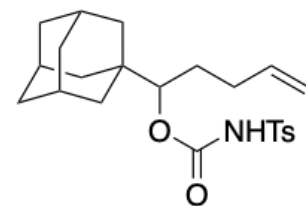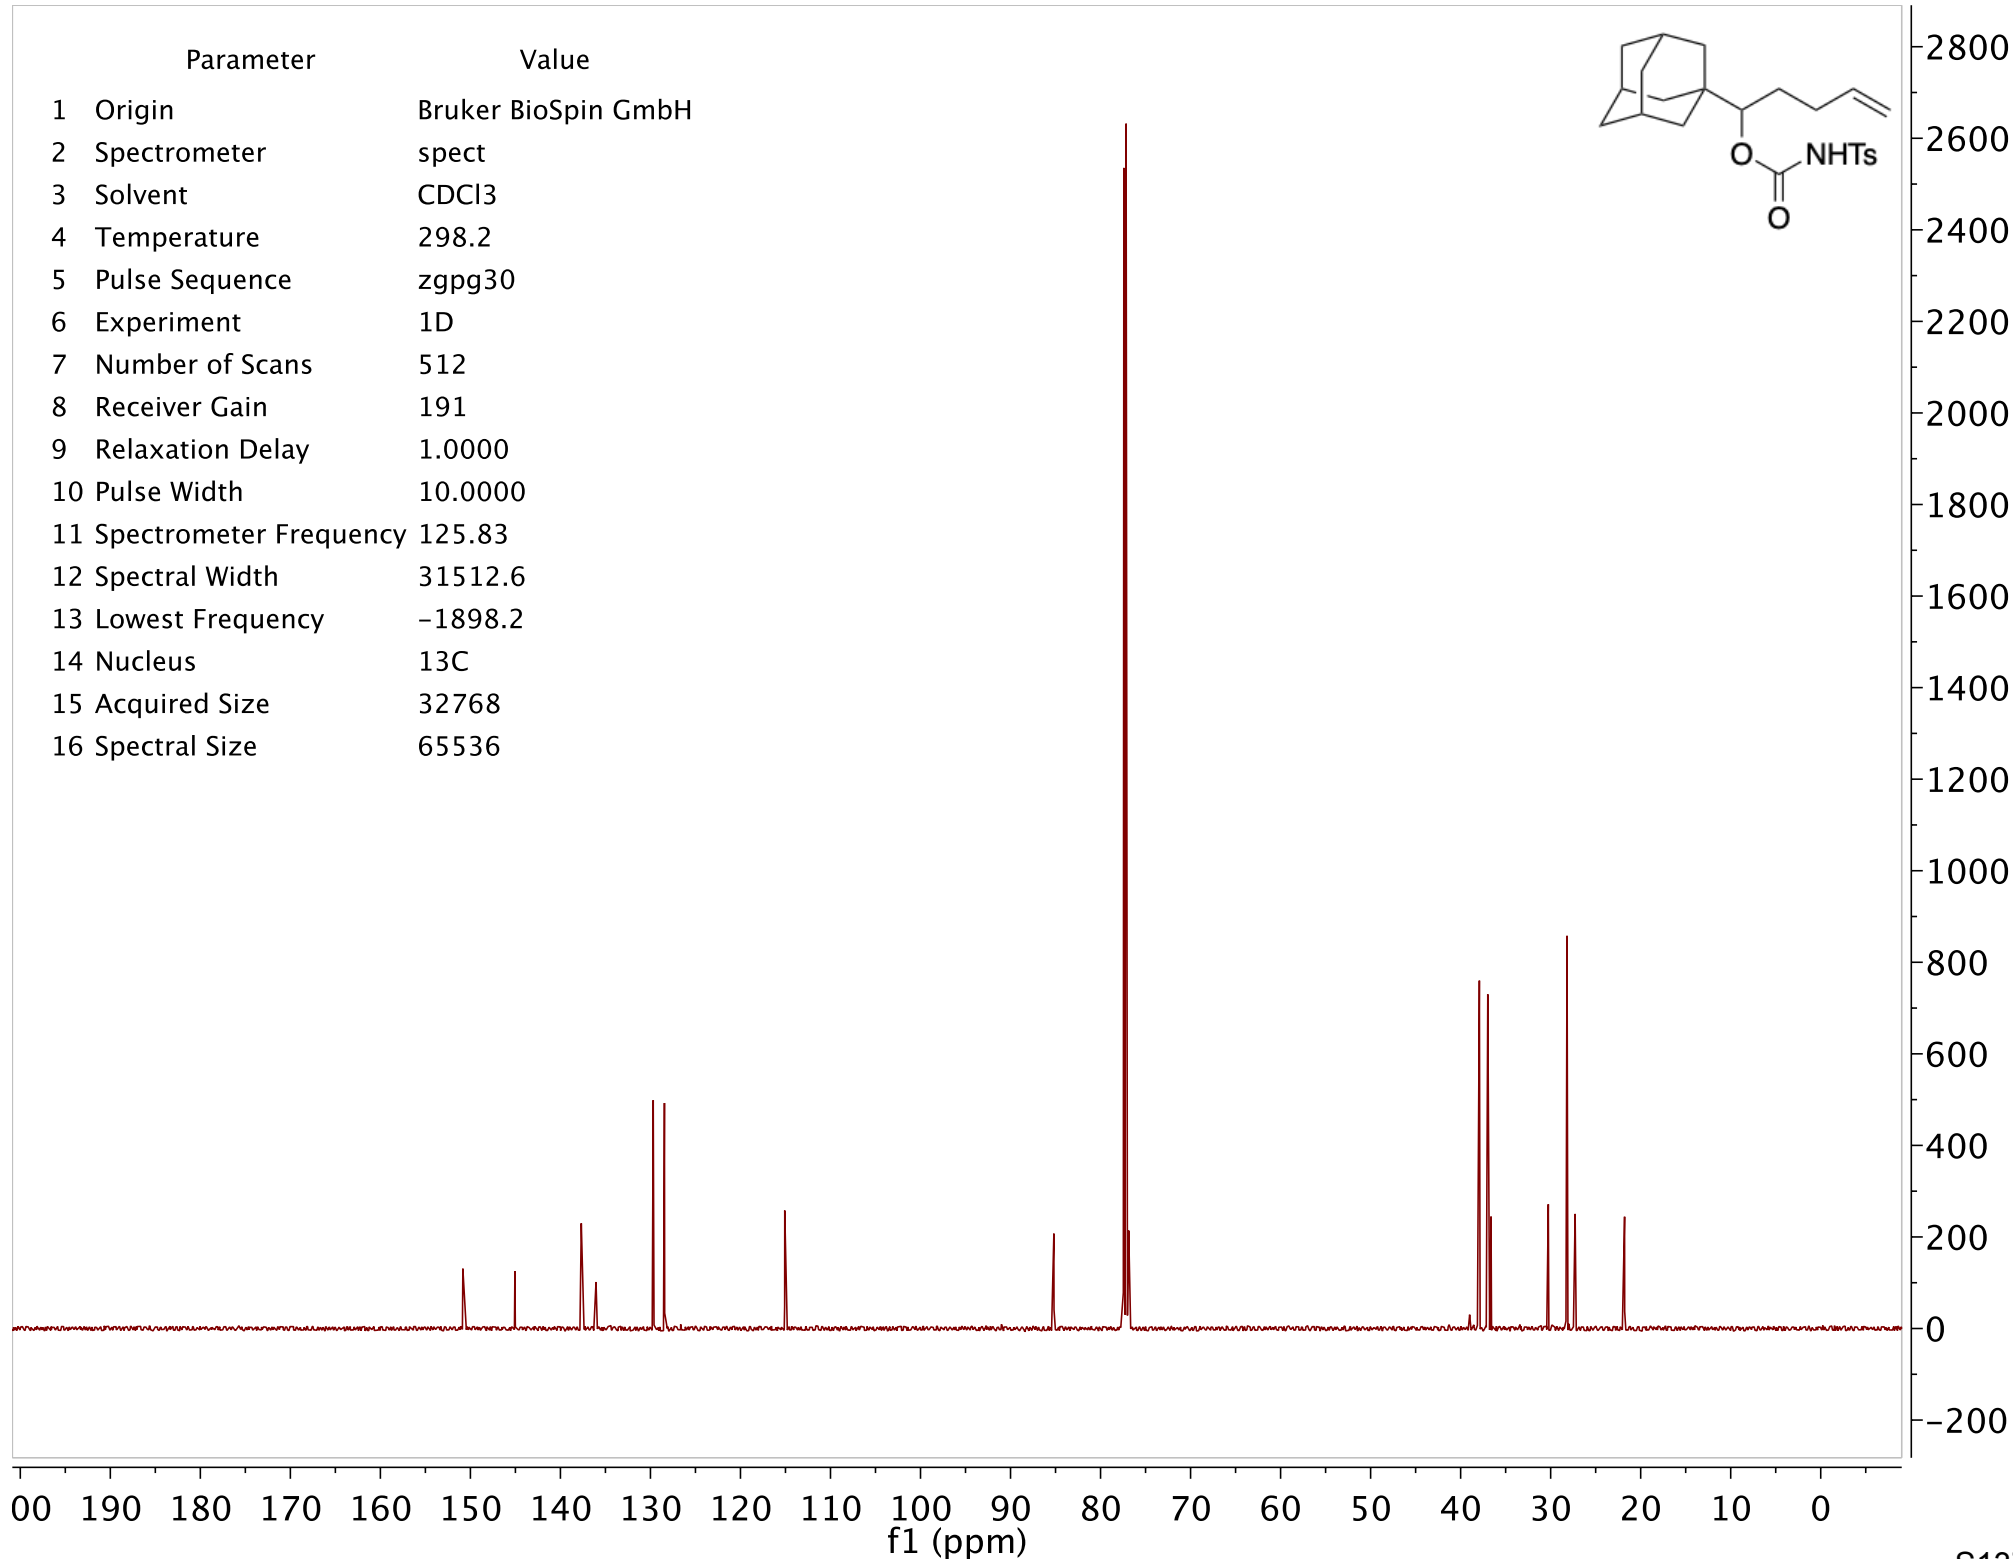

| Parameter                 | Value               |
|---------------------------|---------------------|
| 1 Origin                  | Bruker BioSpin GmbH |
| 2 Spectrometer            | spect               |
| 3 Solvent                 | CDCl3               |
| 4 Temperature             | 296.2               |
| 5 Pulse Sequence          | zg30                |
| 6 Experiment              | 1D                  |
| 7 Number of Scans         | 4                   |
| 8 Receiver Gain           | 30                  |
| 9 Relaxation Delay        | 15.0000             |
| 10 Pulse Width            | 12.0000             |
| 11 Spectrometer Frequency | 500.35              |
| 12 Spectral Width         | 10000.0             |
| 13 Lowest Frequency       | -1922.8             |
| 14 Nucleus                | 1H                  |
| 15 Acquired Size          | 32768               |
| 16 Spectral Size          | 65536               |

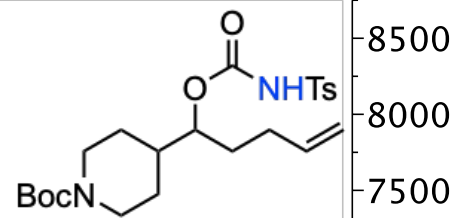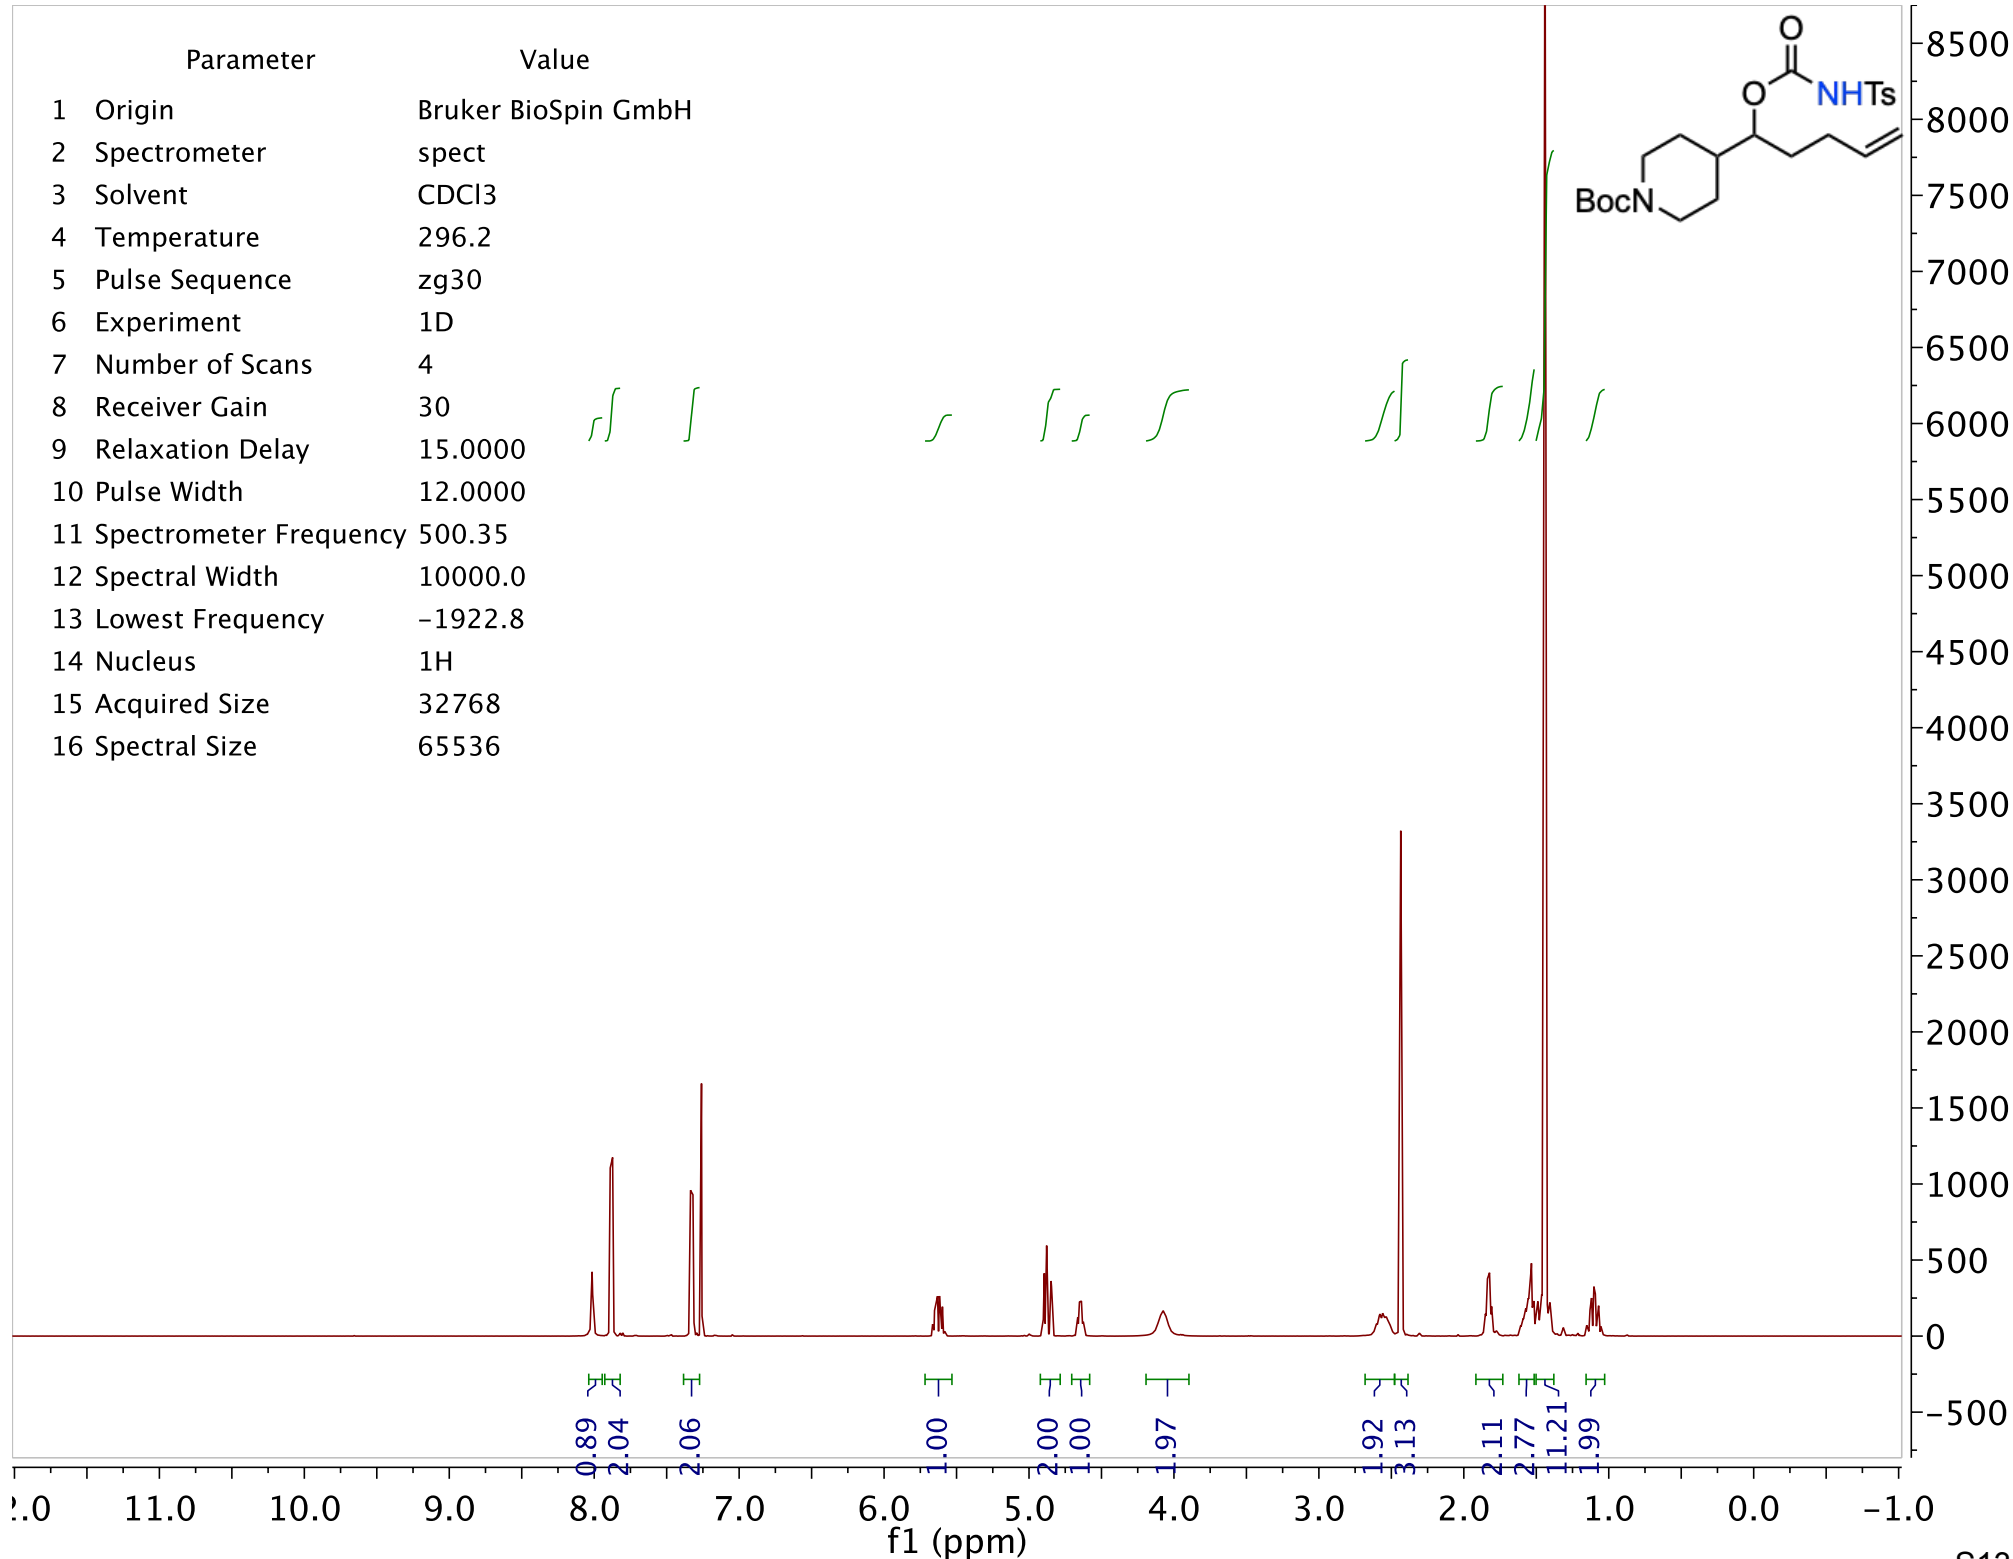

| Parameter                 | Value           |
|---------------------------|-----------------|
| 1 Origin                  | Varian          |
| 2 Spectrometer            | inova           |
| 3 Solvent                 | CDCl3           |
| 4 Temperature             | 41.0            |
| 5 Pulse Sequence          | s2pul           |
| 6 Experiment              | 1D              |
| 7 Number of Scans         | 2774            |
| 8 Receiver Gain           | 60              |
| 9 Relaxation Delay        | 1.0000          |
| 10 Pulse Width            | 6.0000          |
| 11 Spectrometer Frequency | 125.66          |
| 12 Spectral Width         | 30165.9         |
| 13 Lowest Frequency       | -1267.7         |
| 14 Nucleus                | <sup>13</sup> C |
| 15 Acquired Size          | 32768           |
| 16 Spectral Size          | 65536           |

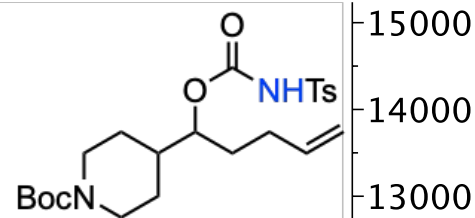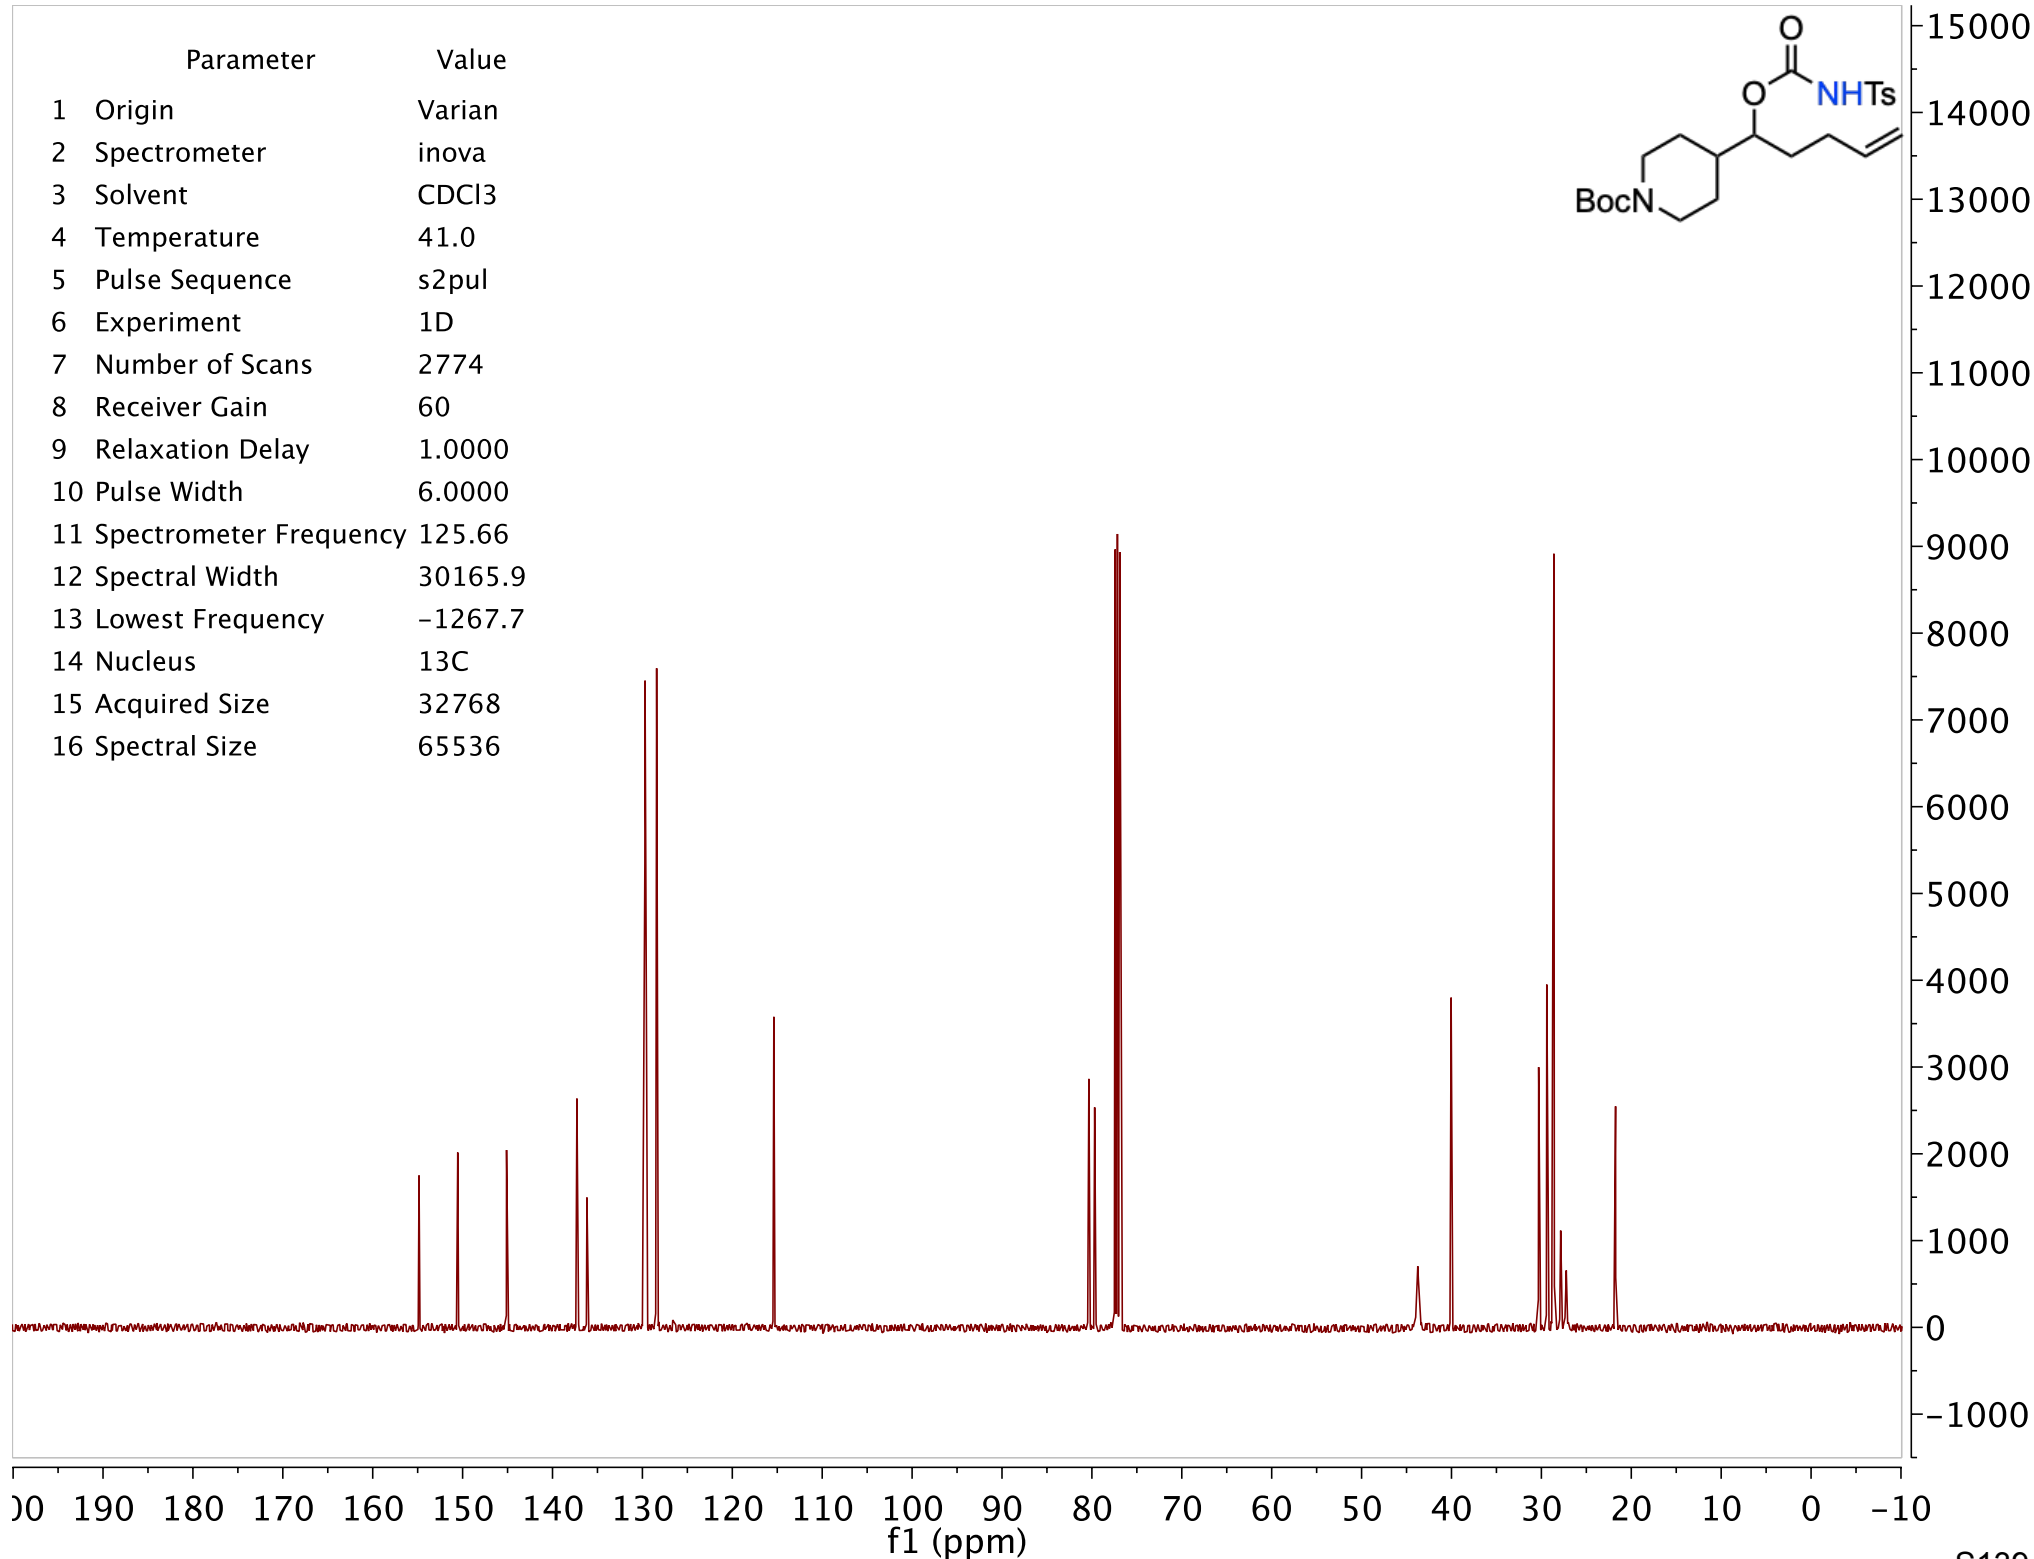

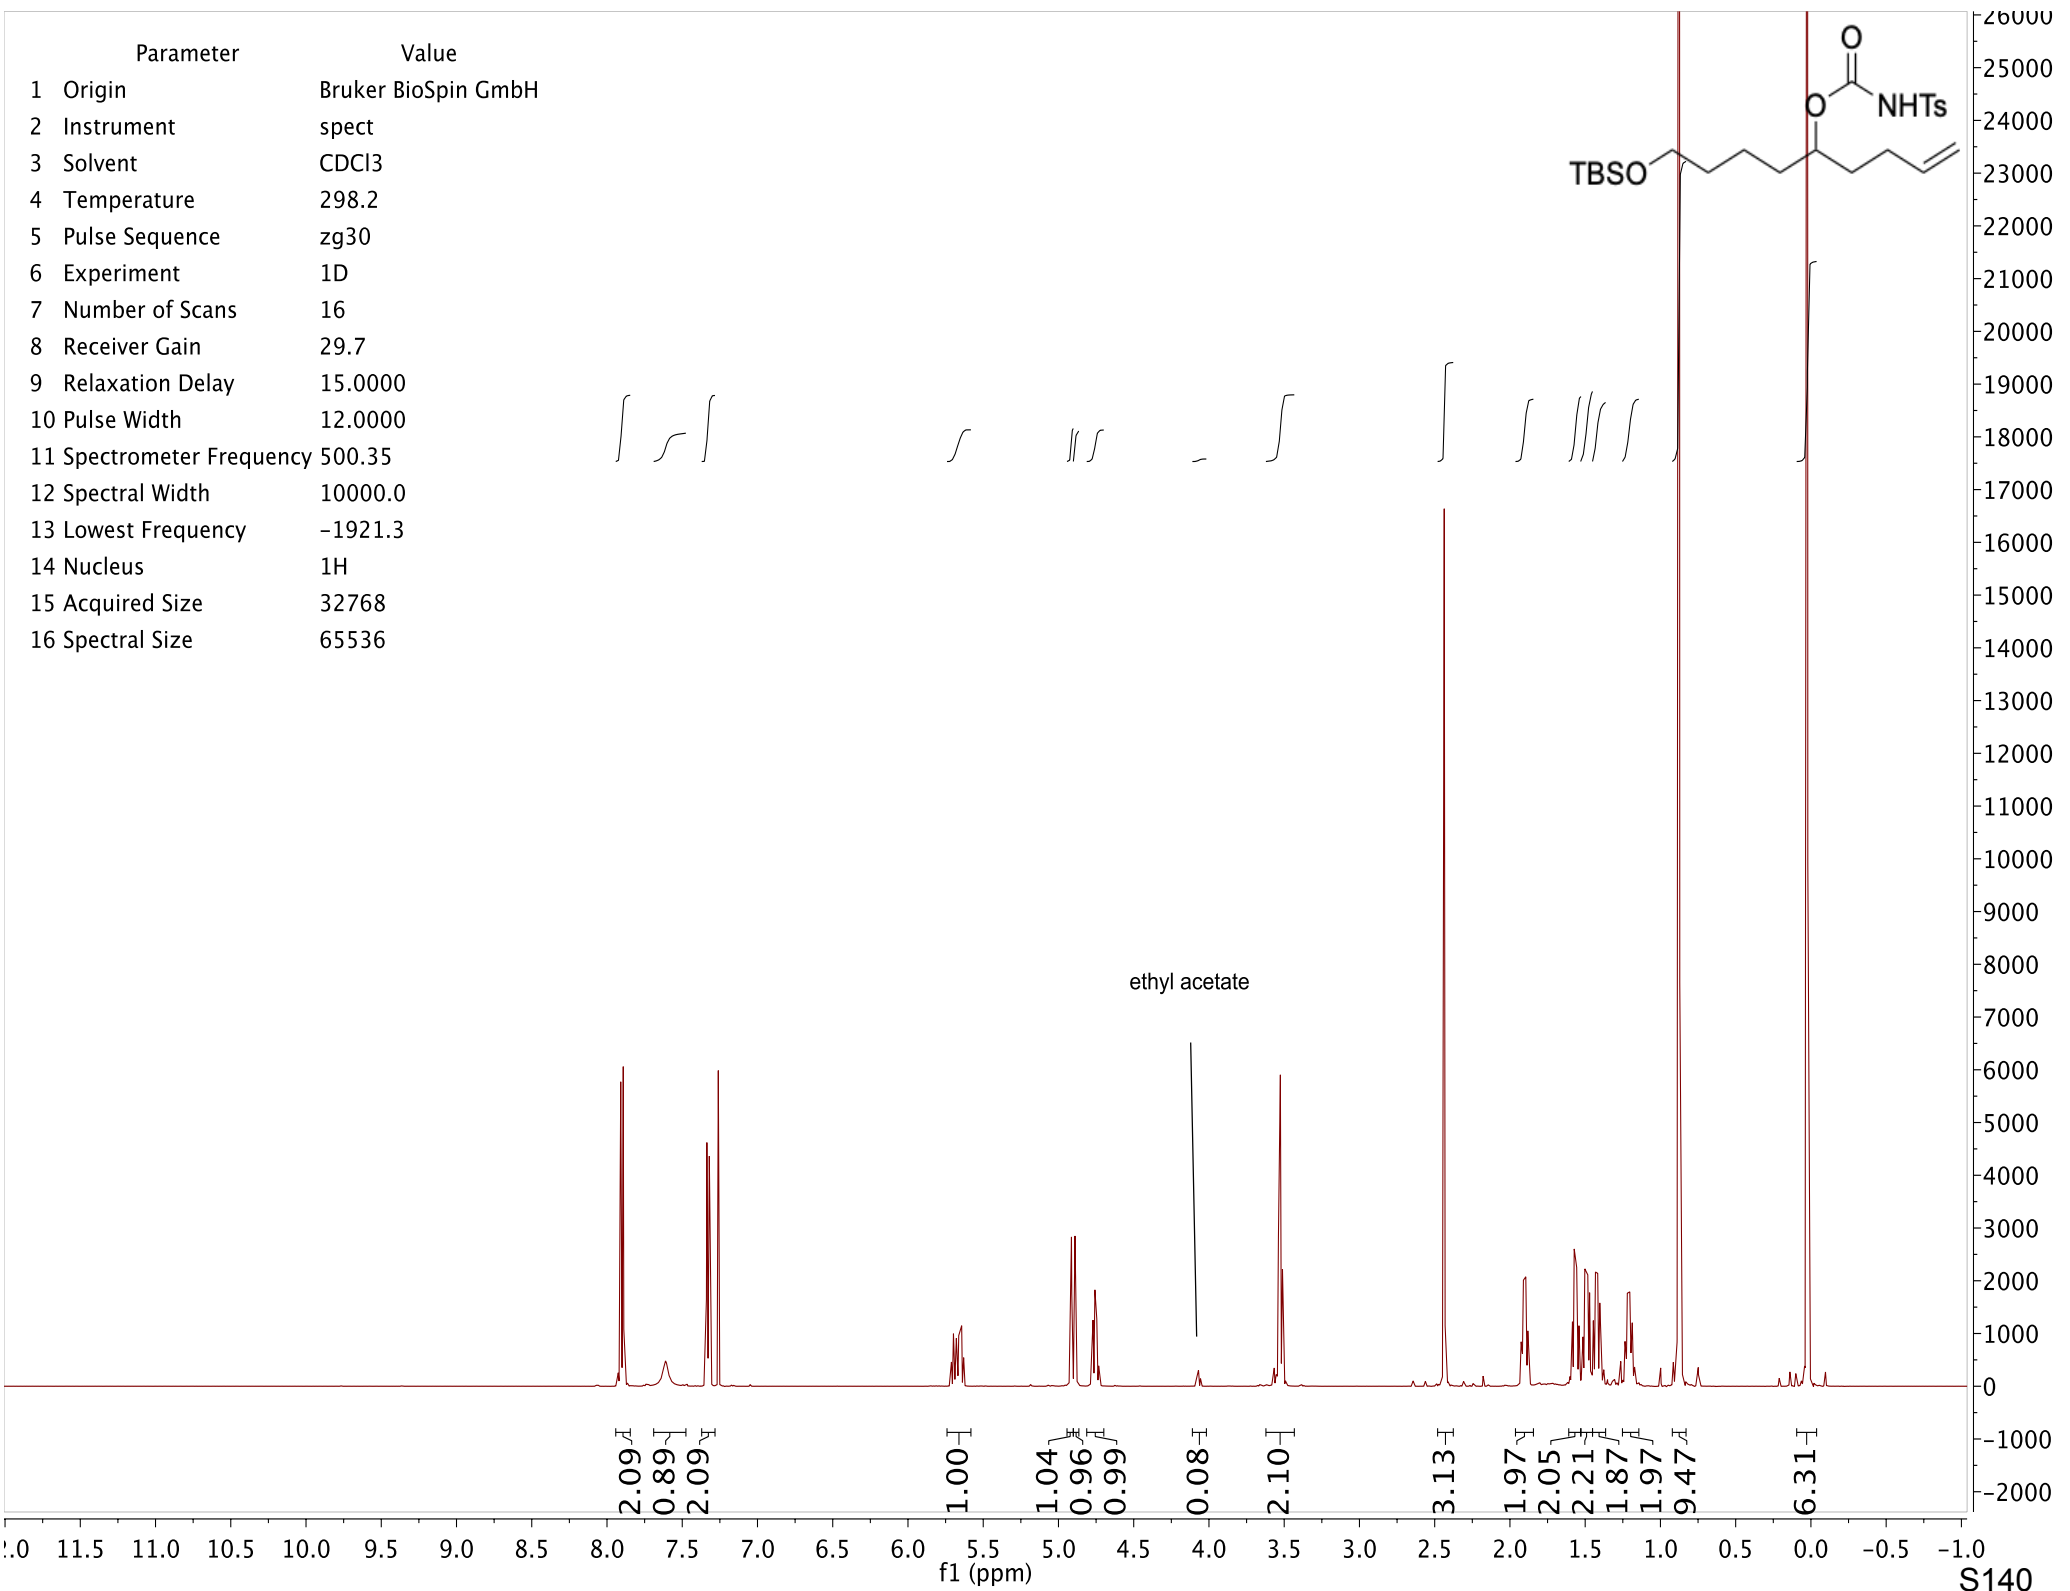

| Parameter                 | Value               |
|---------------------------|---------------------|
| 1 Origin                  | Bruker BioSpin GmbH |
| 2 Instrument              | spect               |
| 3 Solvent                 | CDCl3               |
| 4 Temperature             | 288.9               |
| 5 Pulse Sequence          | zgpg30              |
| 6 Experiment              | 1D                  |
| 7 Number of Scans         | 1024                |
| 8 Receiver Gain           | 190.5               |
| 9 Relaxation Delay        | 2.0000              |
| 10 Pulse Width            | 10.0000             |
| 11 Spectrometer Frequency | 125.83              |
| 12 Spectral Width         | 31512.6             |
| 13 Lowest Frequency       | -1904.5             |
| 14 Nucleus                | 13C                 |
| 15 Acquired Size          | 32768               |
| 16 Spectral Size          | 65536               |

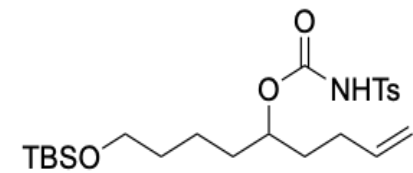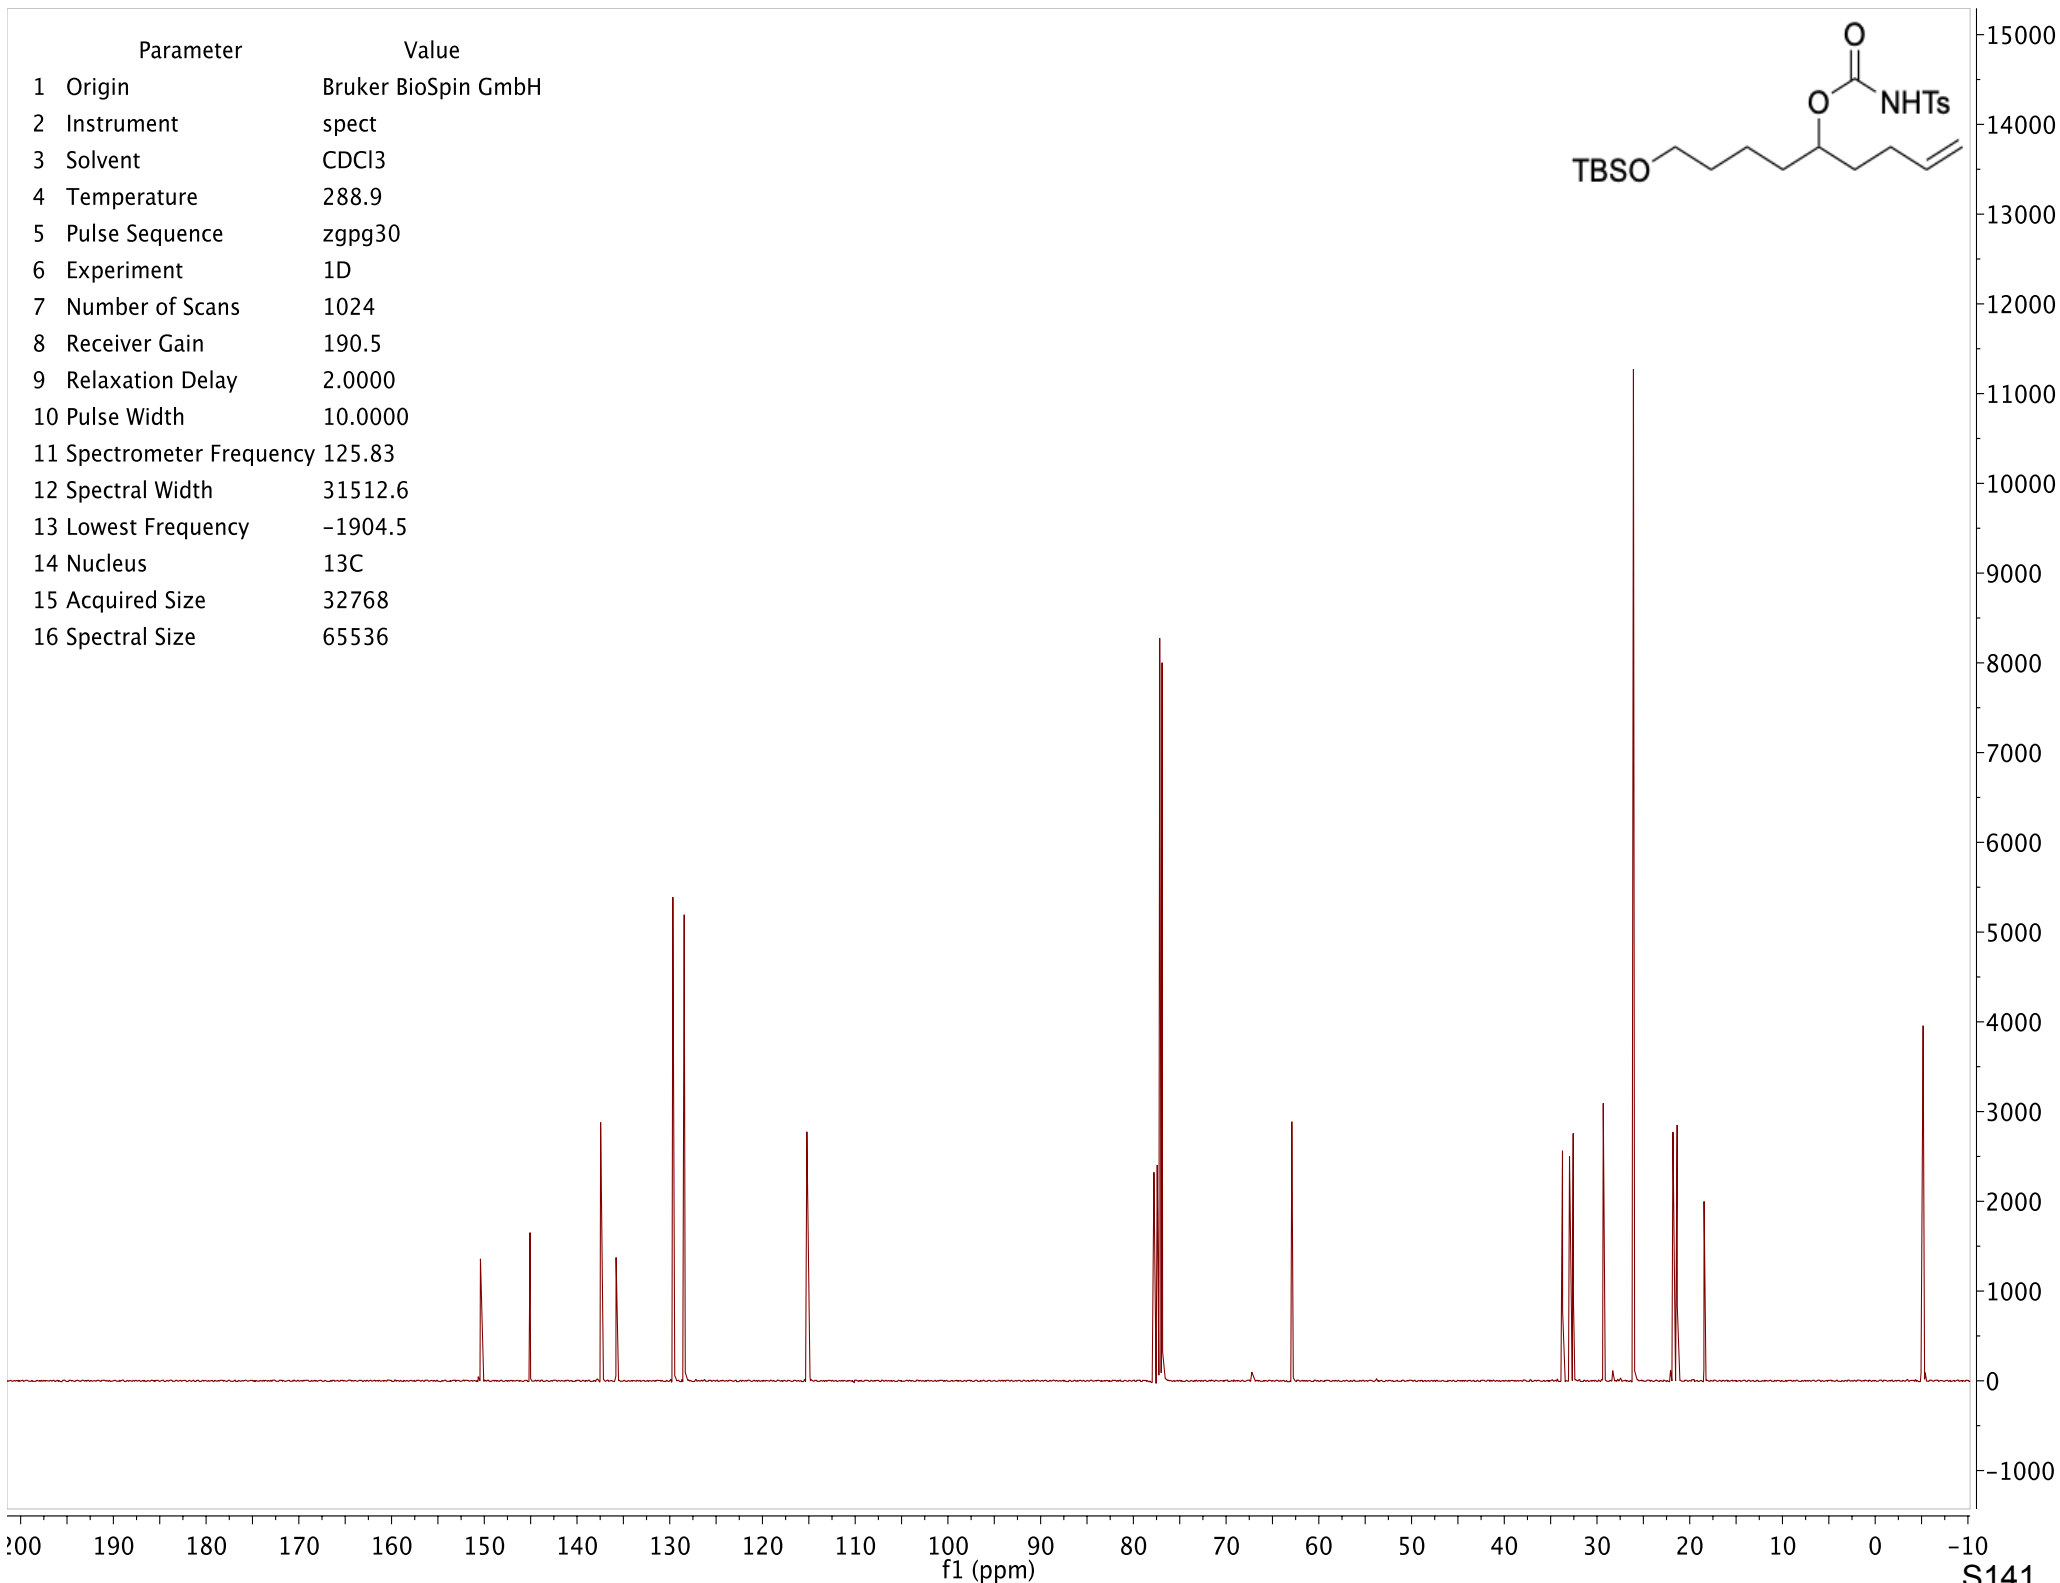

| Parameter                 | Value               |
|---------------------------|---------------------|
| 1 Origin                  | Bruker BioSpin GmbH |
| 2 Instrument              | spect               |
| 3 Solvent                 | CDCl3               |
| 4 Temperature             | 298.1               |
| 5 Pulse Sequence          | zg30                |
| 6 Experiment              | 1D                  |
| 7 Number of Scans         | 16                  |
| 8 Receiver Gain           | 29.7                |
| 9 Relaxation Delay        | 15.0000             |
| 10 Pulse Width            | 12.0000             |
| 11 Spectrometer Frequency | 500.35              |
| 12 Spectral Width         | 10000.0             |
| 13 Lowest Frequency       | -1921.5             |
| 14 Nucleus                | 1H                  |
| 15 Acquired Size          | 32768               |
| 16 Spectral Size          | 65536               |

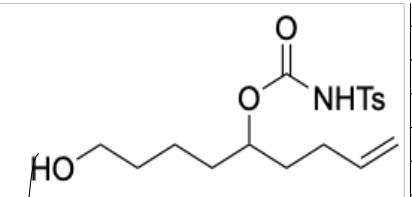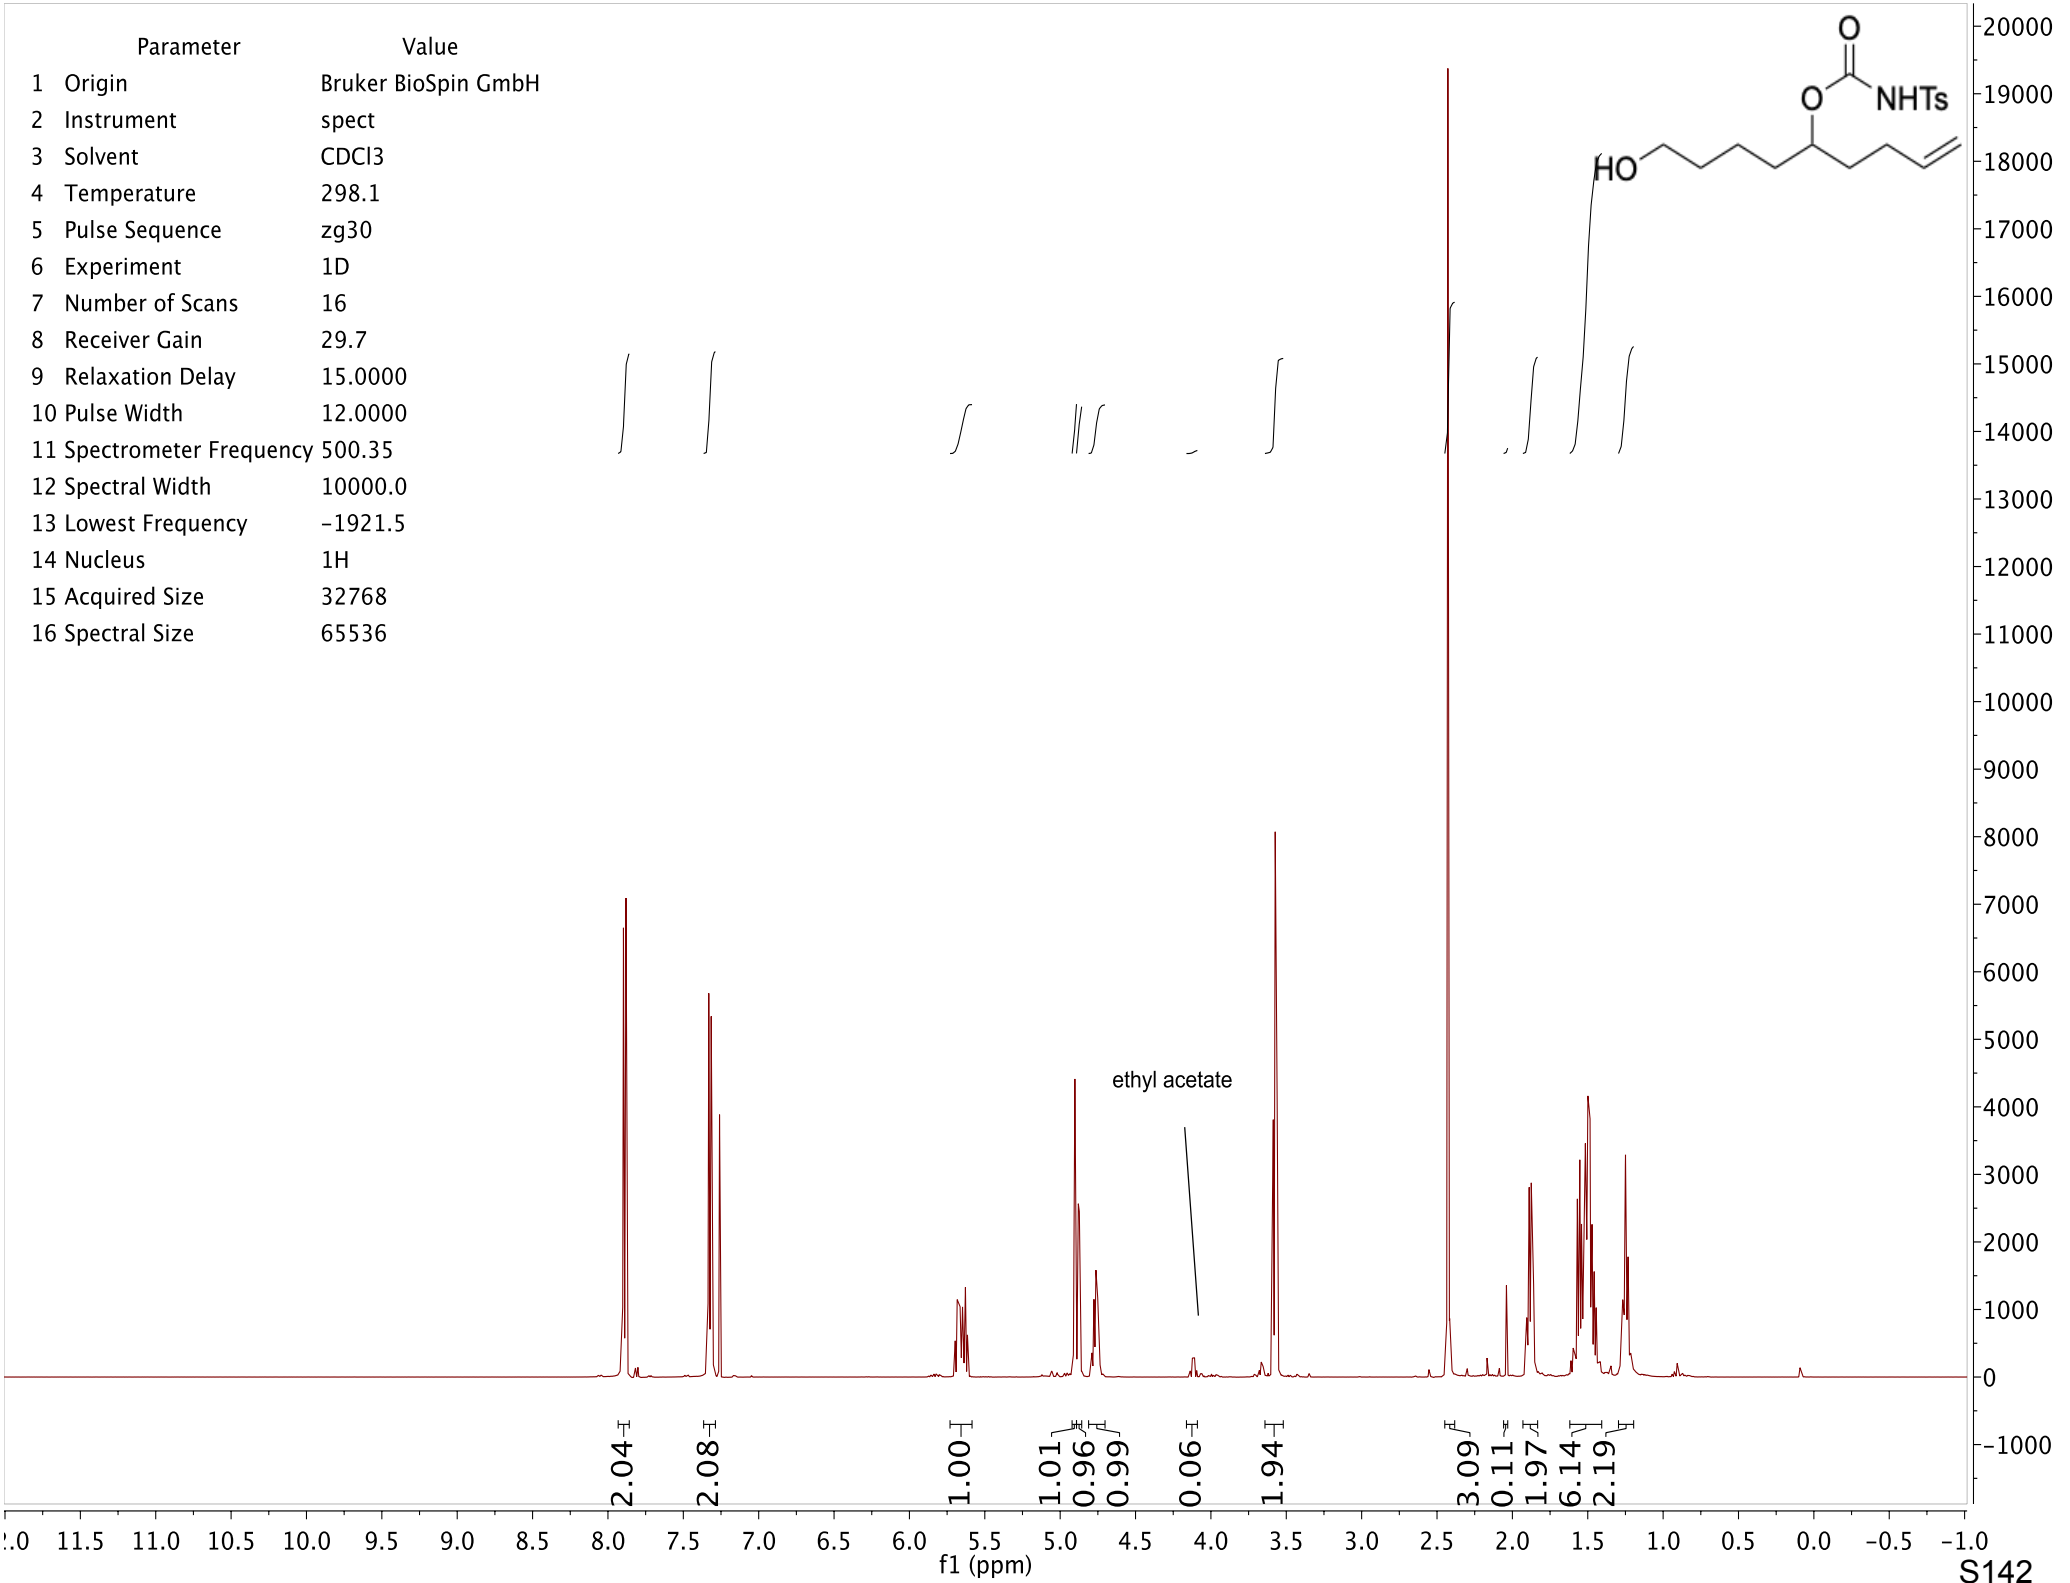



| Parameter                 | Value               |
|---------------------------|---------------------|
| 1 Origin                  | Bruker BioSpin GmbH |
| 2 Instrument              | spect               |
| 3 Solvent                 | CDCl3               |
| 4 Temperature             | 289.0               |
| 5 Pulse Sequence          | zgpg30              |
| 6 Experiment              | 1D                  |
| 7 Number of Scans         | 1024                |
| 8 Receiver Gain           | 190.5               |
| 9 Relaxation Delay        | 2.0000              |
| 10 Pulse Width            | 10.0000             |
| 11 Spectrometer Frequency | 125.83              |
| 12 Spectral Width         | 31512.6             |
| 13 Lowest Frequency       | -1906.4             |
| 14 Nucleus                | 13C                 |
| 15 Acquired Size          | 32768               |
| 16 Spectral Size          | 65536               |

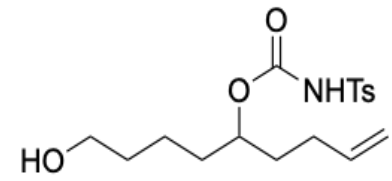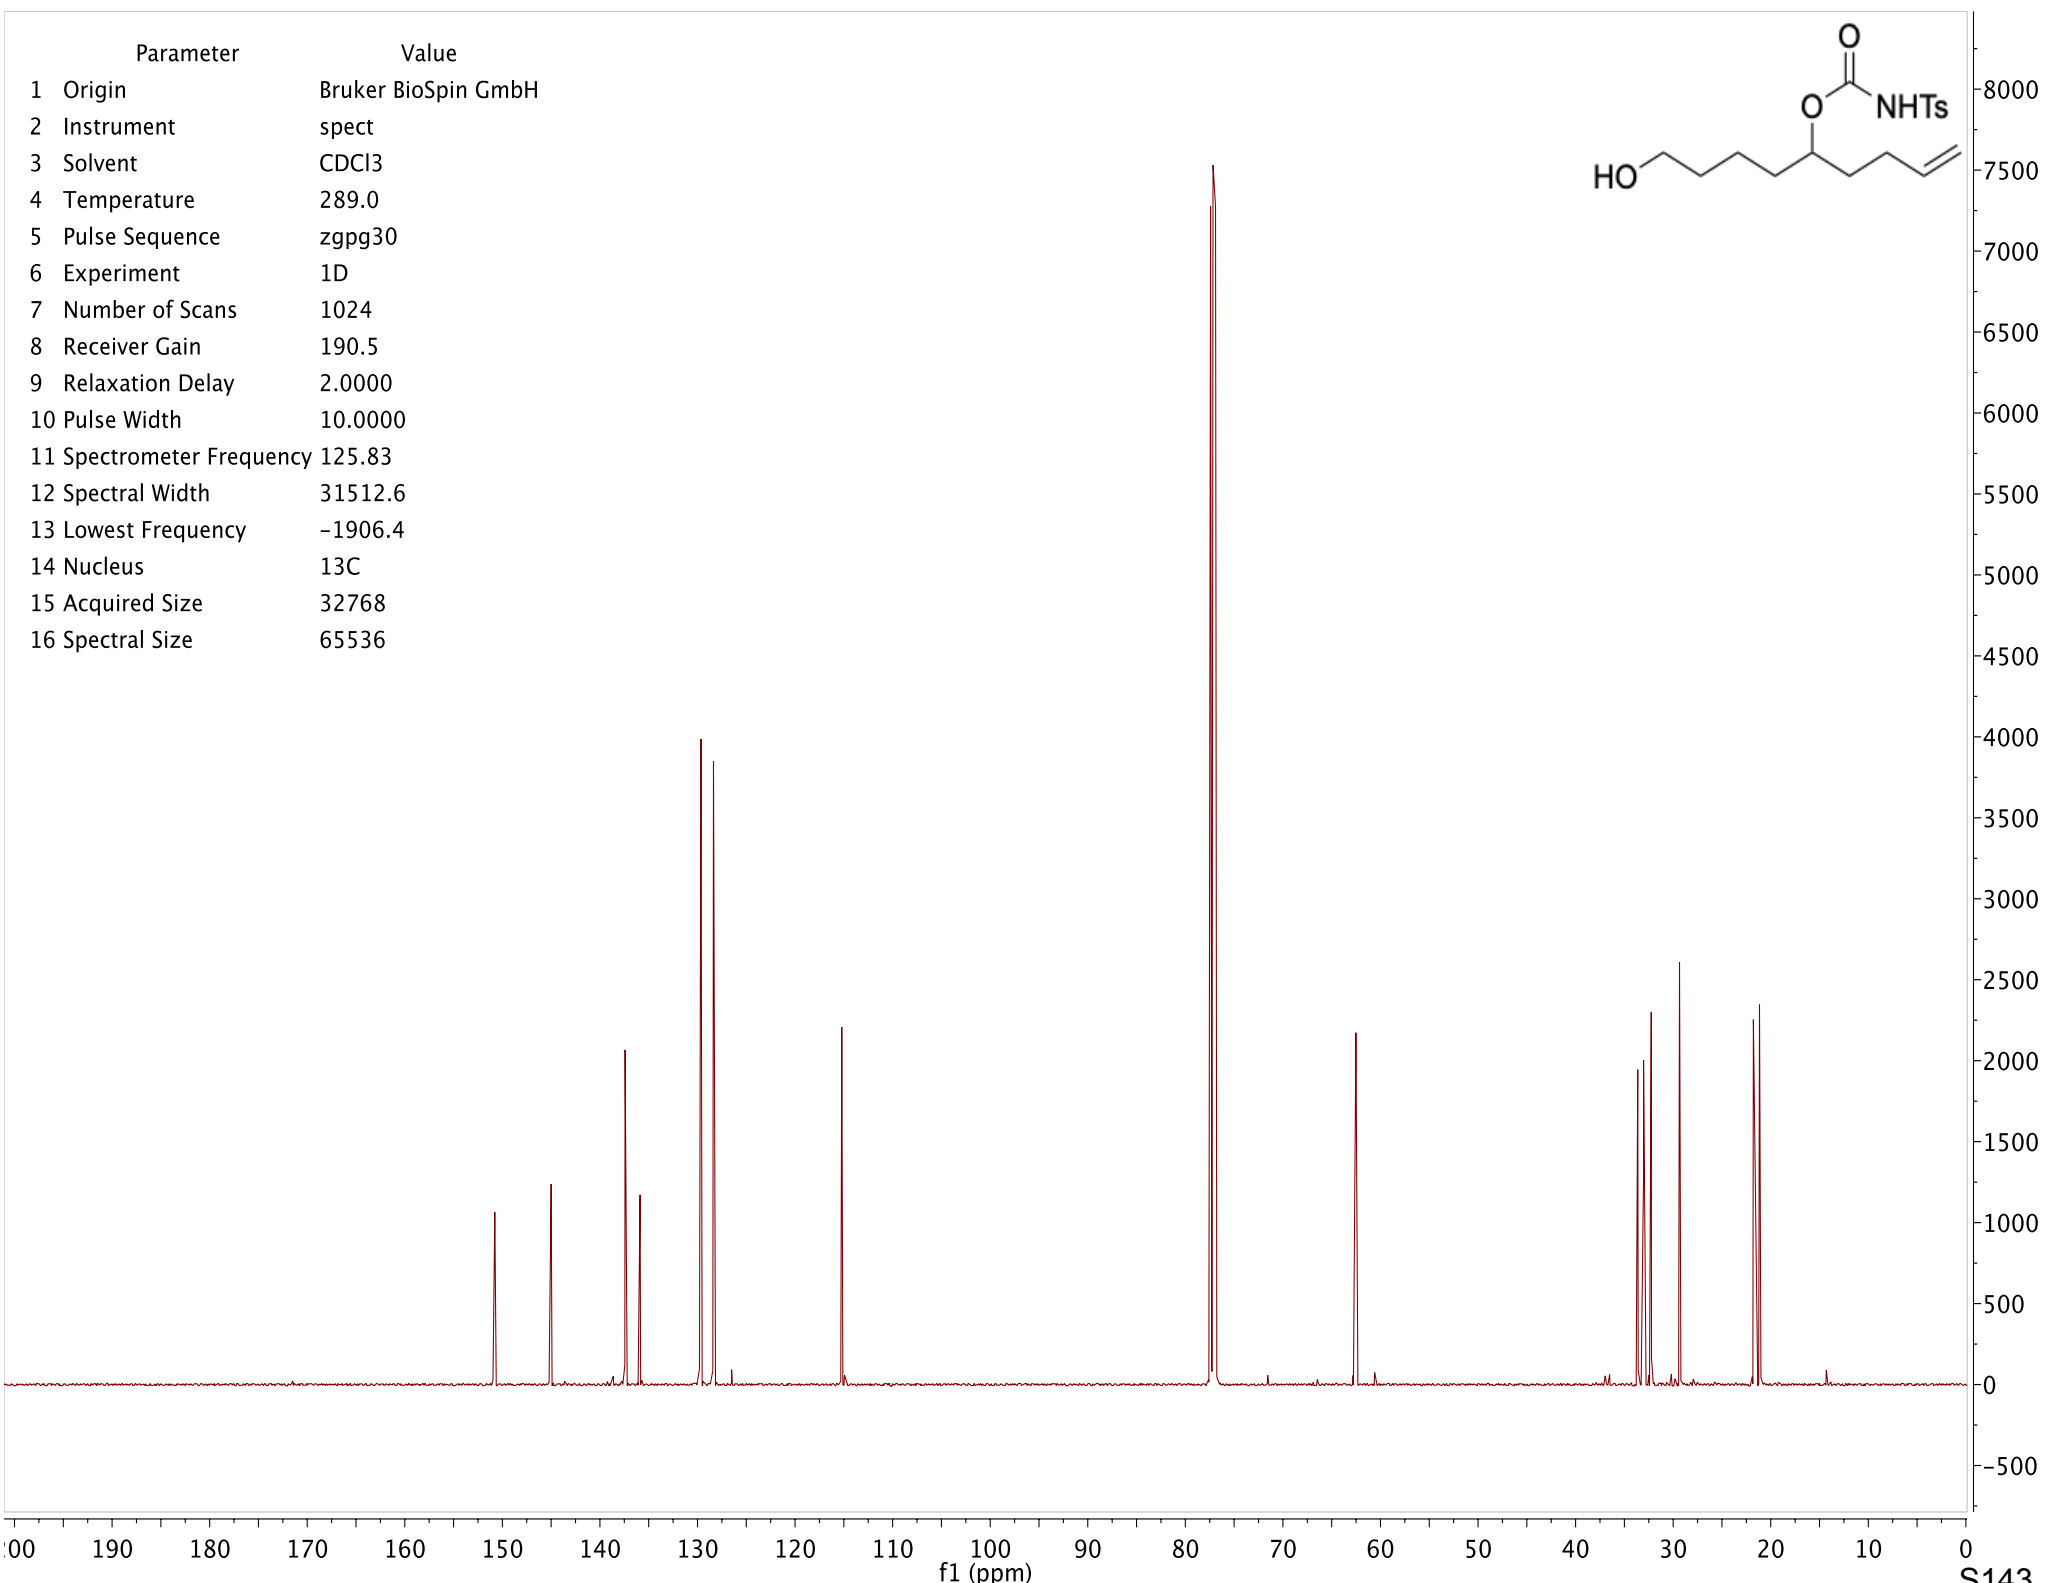

| Parameter                 | Value               |
|---------------------------|---------------------|
| 1 Origin                  | Bruker BioSpin GmbH |
| 2 Instrument              | spect               |
| 3 Solvent                 | CDCl3               |
| 4 Temperature             | 298.0               |
| 5 Pulse Sequence          | zg30                |
| 6 Experiment              | 1D                  |
| 7 Number of Scans         | 16                  |
| 8 Receiver Gain           | 29.7                |
| 9 Relaxation Delay        | 15.0000             |
| 10 Pulse Width            | 12.0000             |
| 11 Spectrometer Frequency | 500.35              |
| 12 Spectral Width         | 10000.0             |
| 13 Lowest Frequency       | -1907.3             |
| 14 Nucleus                | <sup>1</sup> H      |
| 15 Acquired Size          | 32768               |
| 16 Spectral Size          | 65536               |

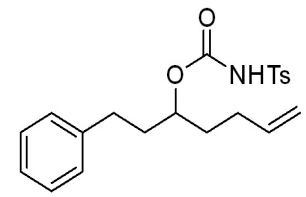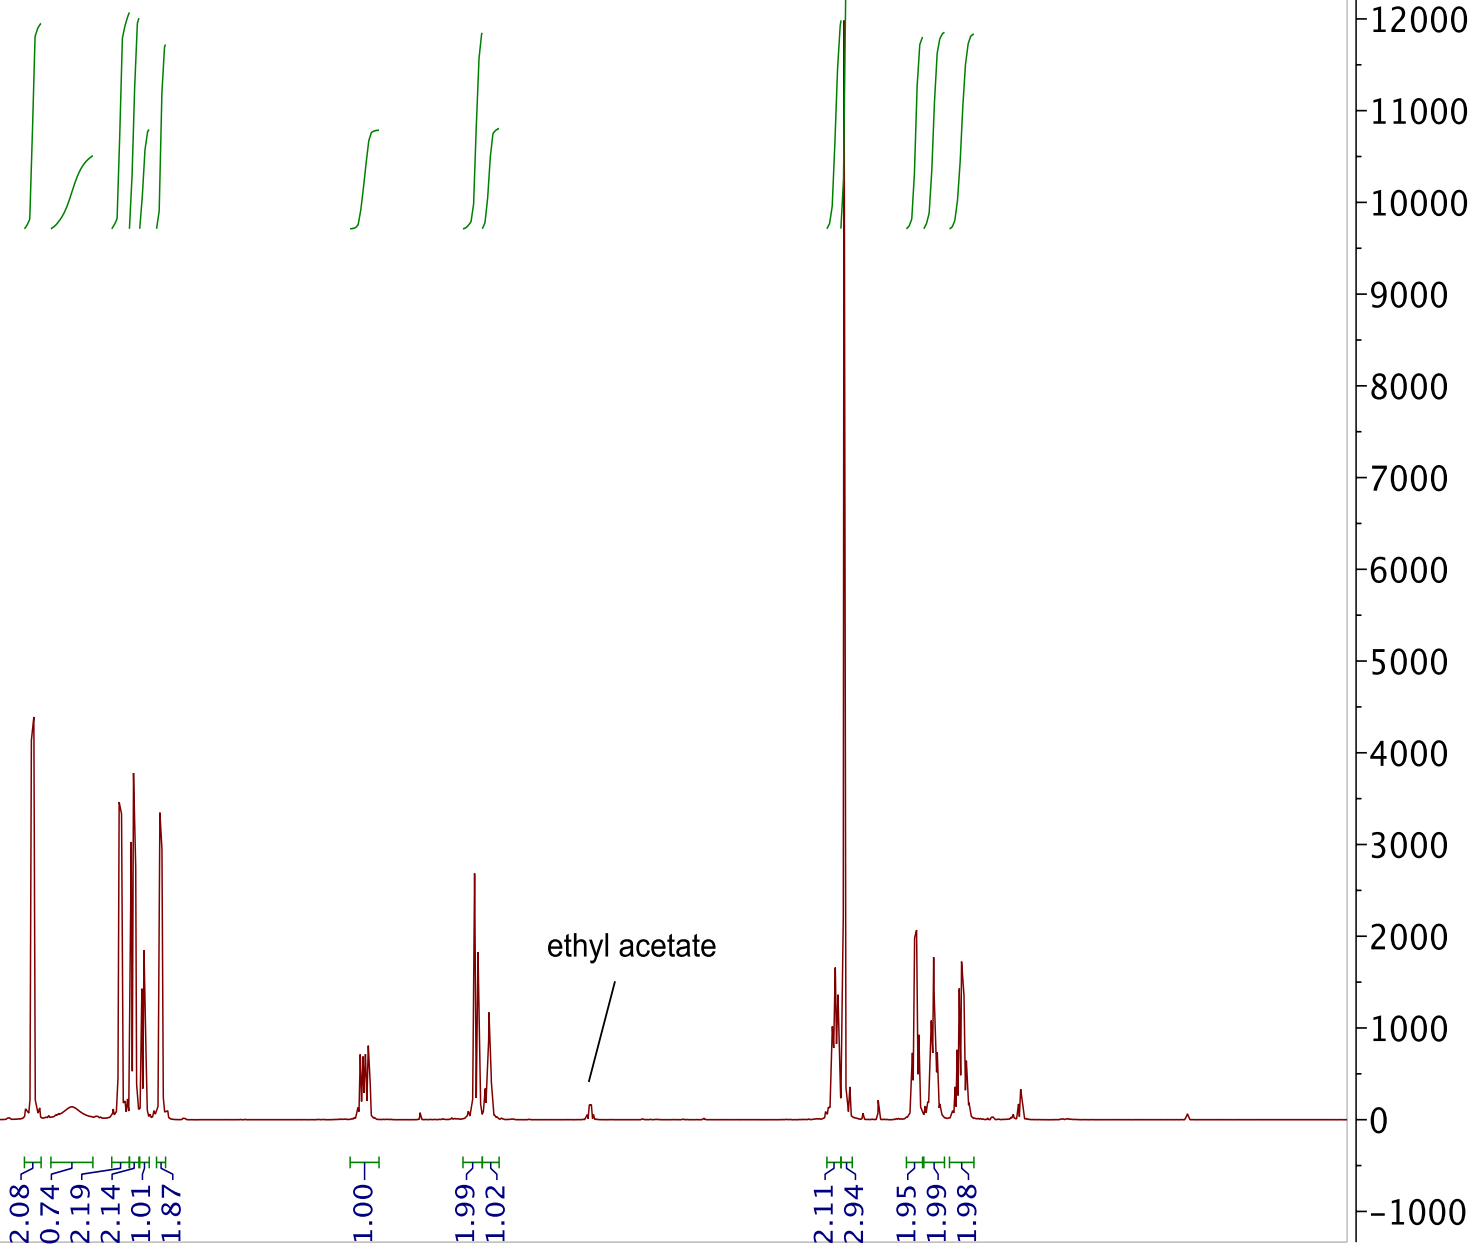

11.5 10.5 9.5 8.5 7.5 6.5 5.5 4.5 3.5 2.5 1.5 0.5 -0.5  
f1 (ppm)

| Parameter                 | Value               |
|---------------------------|---------------------|
| 1 Origin                  | Bruker BioSpin GmbH |
| 2 Instrument              | spect               |
| 3 Solvent                 | CDCl3               |
| 4 Temperature             | 298.0               |
| 5 Pulse Sequence          | zgpg30              |
| 6 Experiment              | 1D                  |
| 7 Number of Scans         | 1024                |
| 8 Receiver Gain           | 190.5               |
| 9 Relaxation Delay        | 2.0000              |
| 10 Pulse Width            | 10.0000             |
| 11 Spectrometer Frequency | 125.83              |
| 12 Spectral Width         | 31512.6             |
| 13 Lowest Frequency       | -1903.3             |
| 14 Nucleus                | 13C                 |
| 15 Acquired Size          | 32768               |
| 16 Spectral Size          | 65536               |

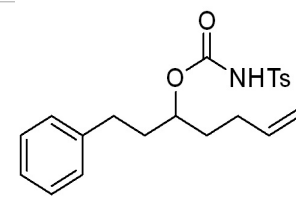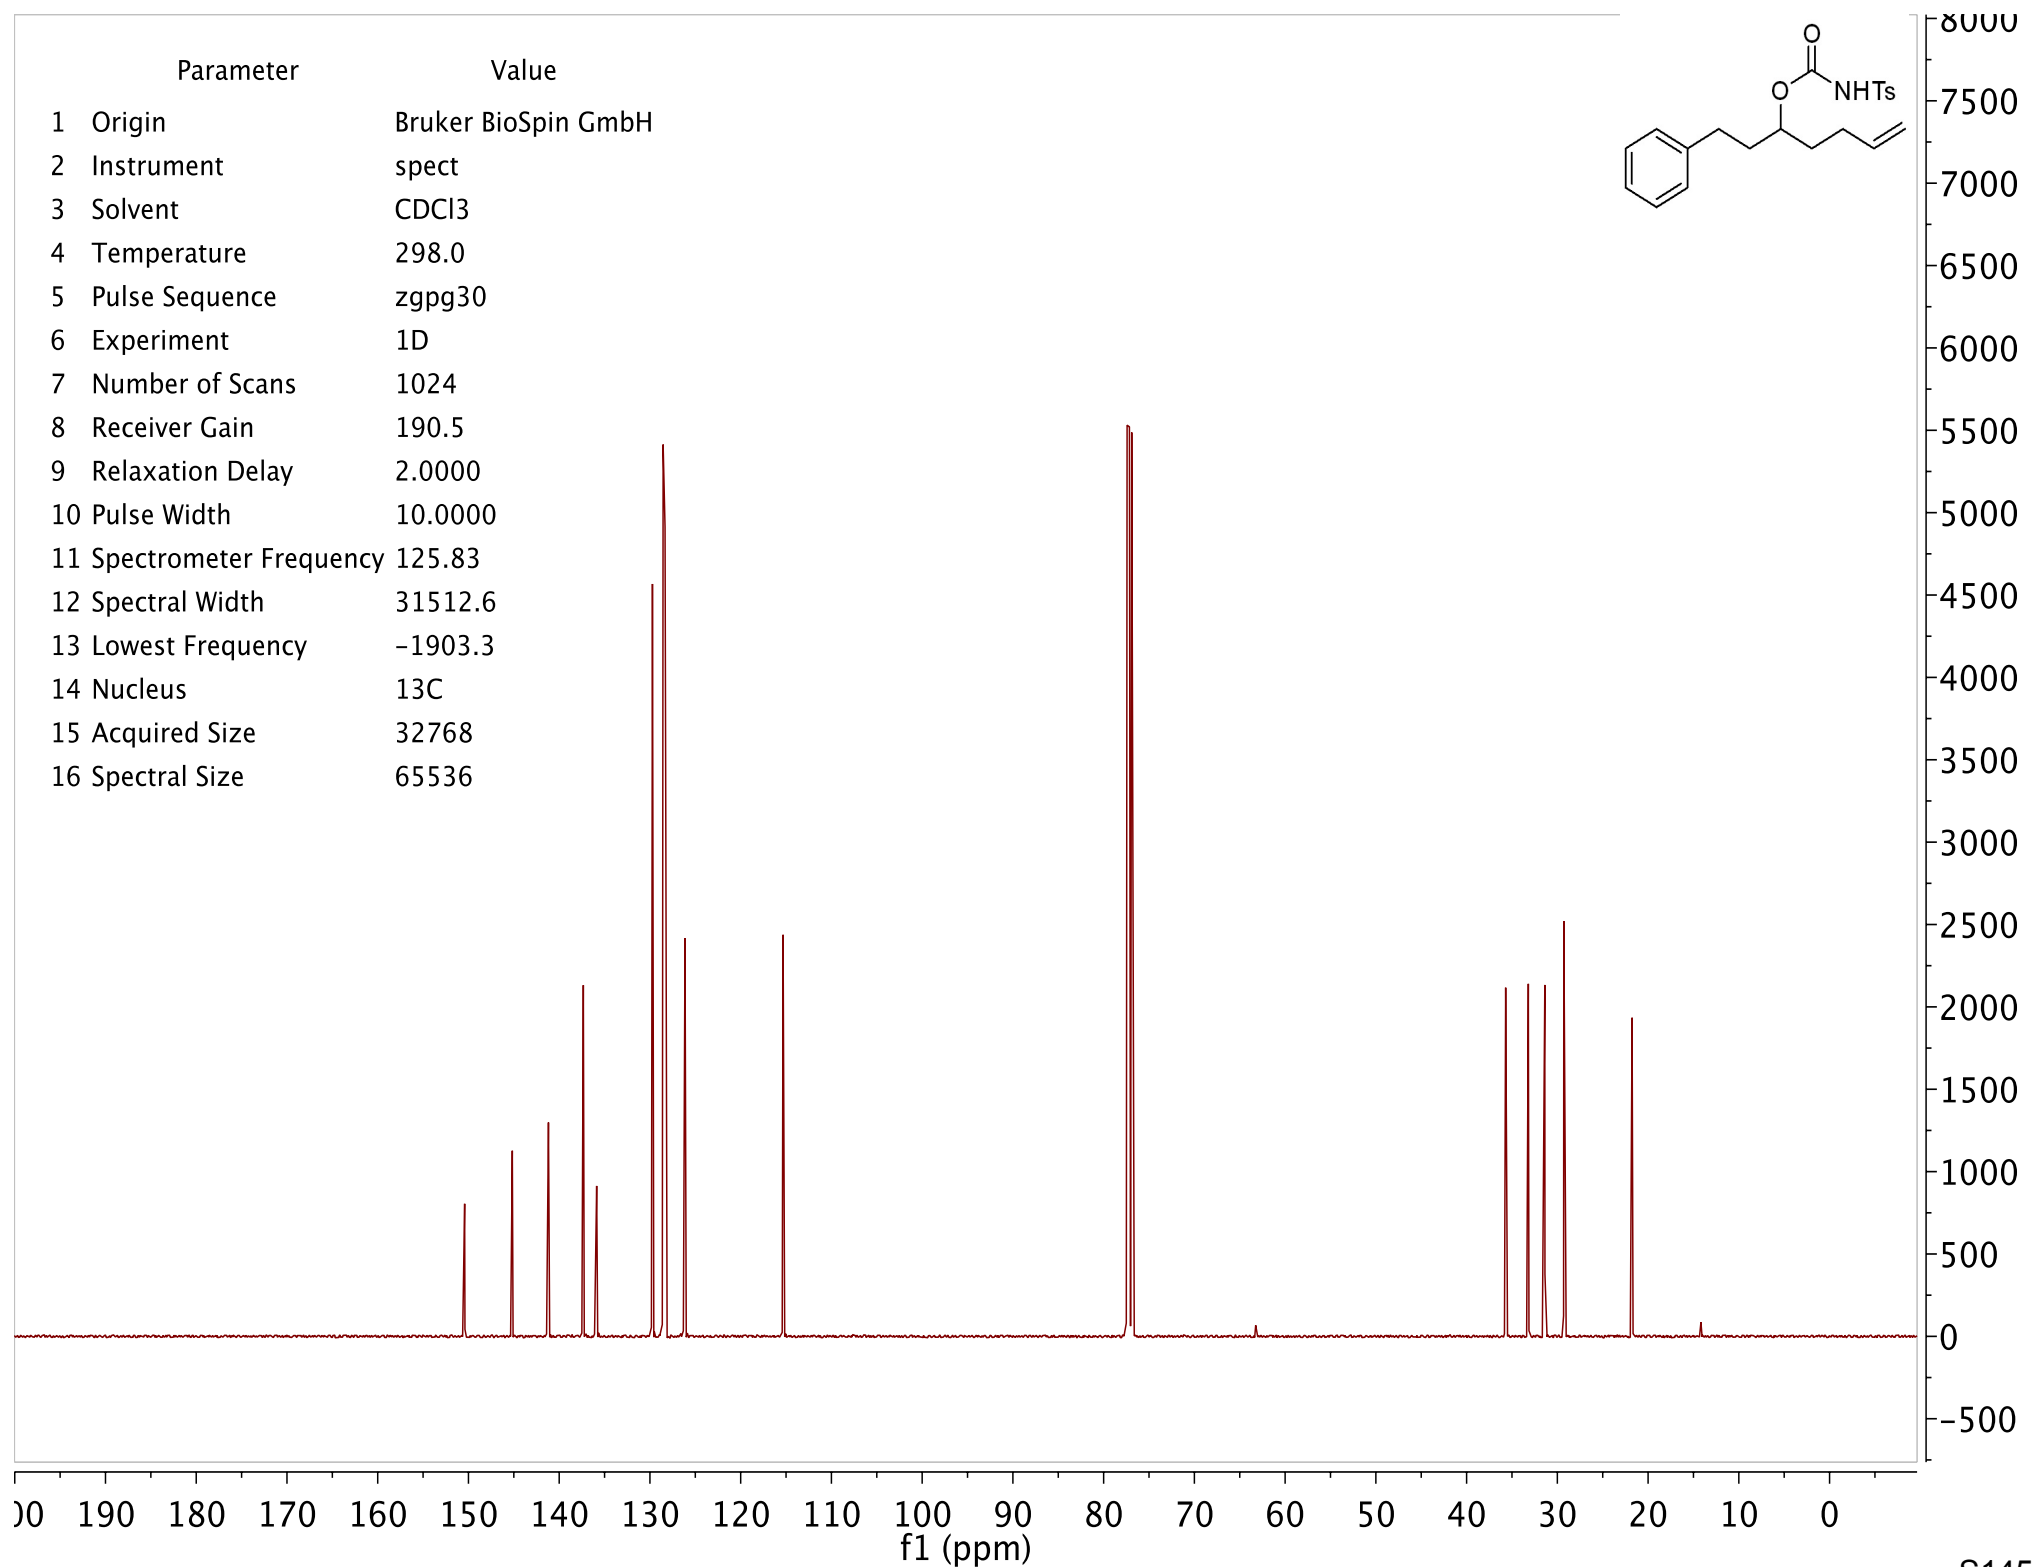

| Parameter                 | Value               |
|---------------------------|---------------------|
| 1 Origin                  | Bruker BioSpin GmbH |
| 2 Instrument              | spect               |
| 3 Solvent                 | CDCl3               |
| 4 Temperature             | 289.2               |
| 5 Pulse Sequence          | zg30                |
| 6 Experiment              | 1D                  |
| 7 Number of Scans         | 16                  |
| 8 Receiver Gain           | 69.2                |
| 9 Relaxation Delay        | 15.0000             |
| 10 Pulse Width            | 12.0000             |
| 11 Spectrometer Frequency | 500.35              |
| 12 Spectral Width         | 10000.0             |
| 13 Lowest Frequency       | -1921.3             |
| 14 Nucleus                | 1H                  |
| 15 Acquired Size          | 32768               |
| 16 Spectral Size          | 65536               |

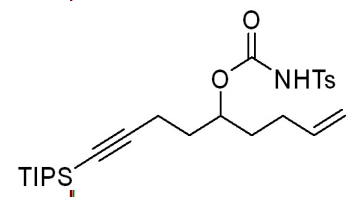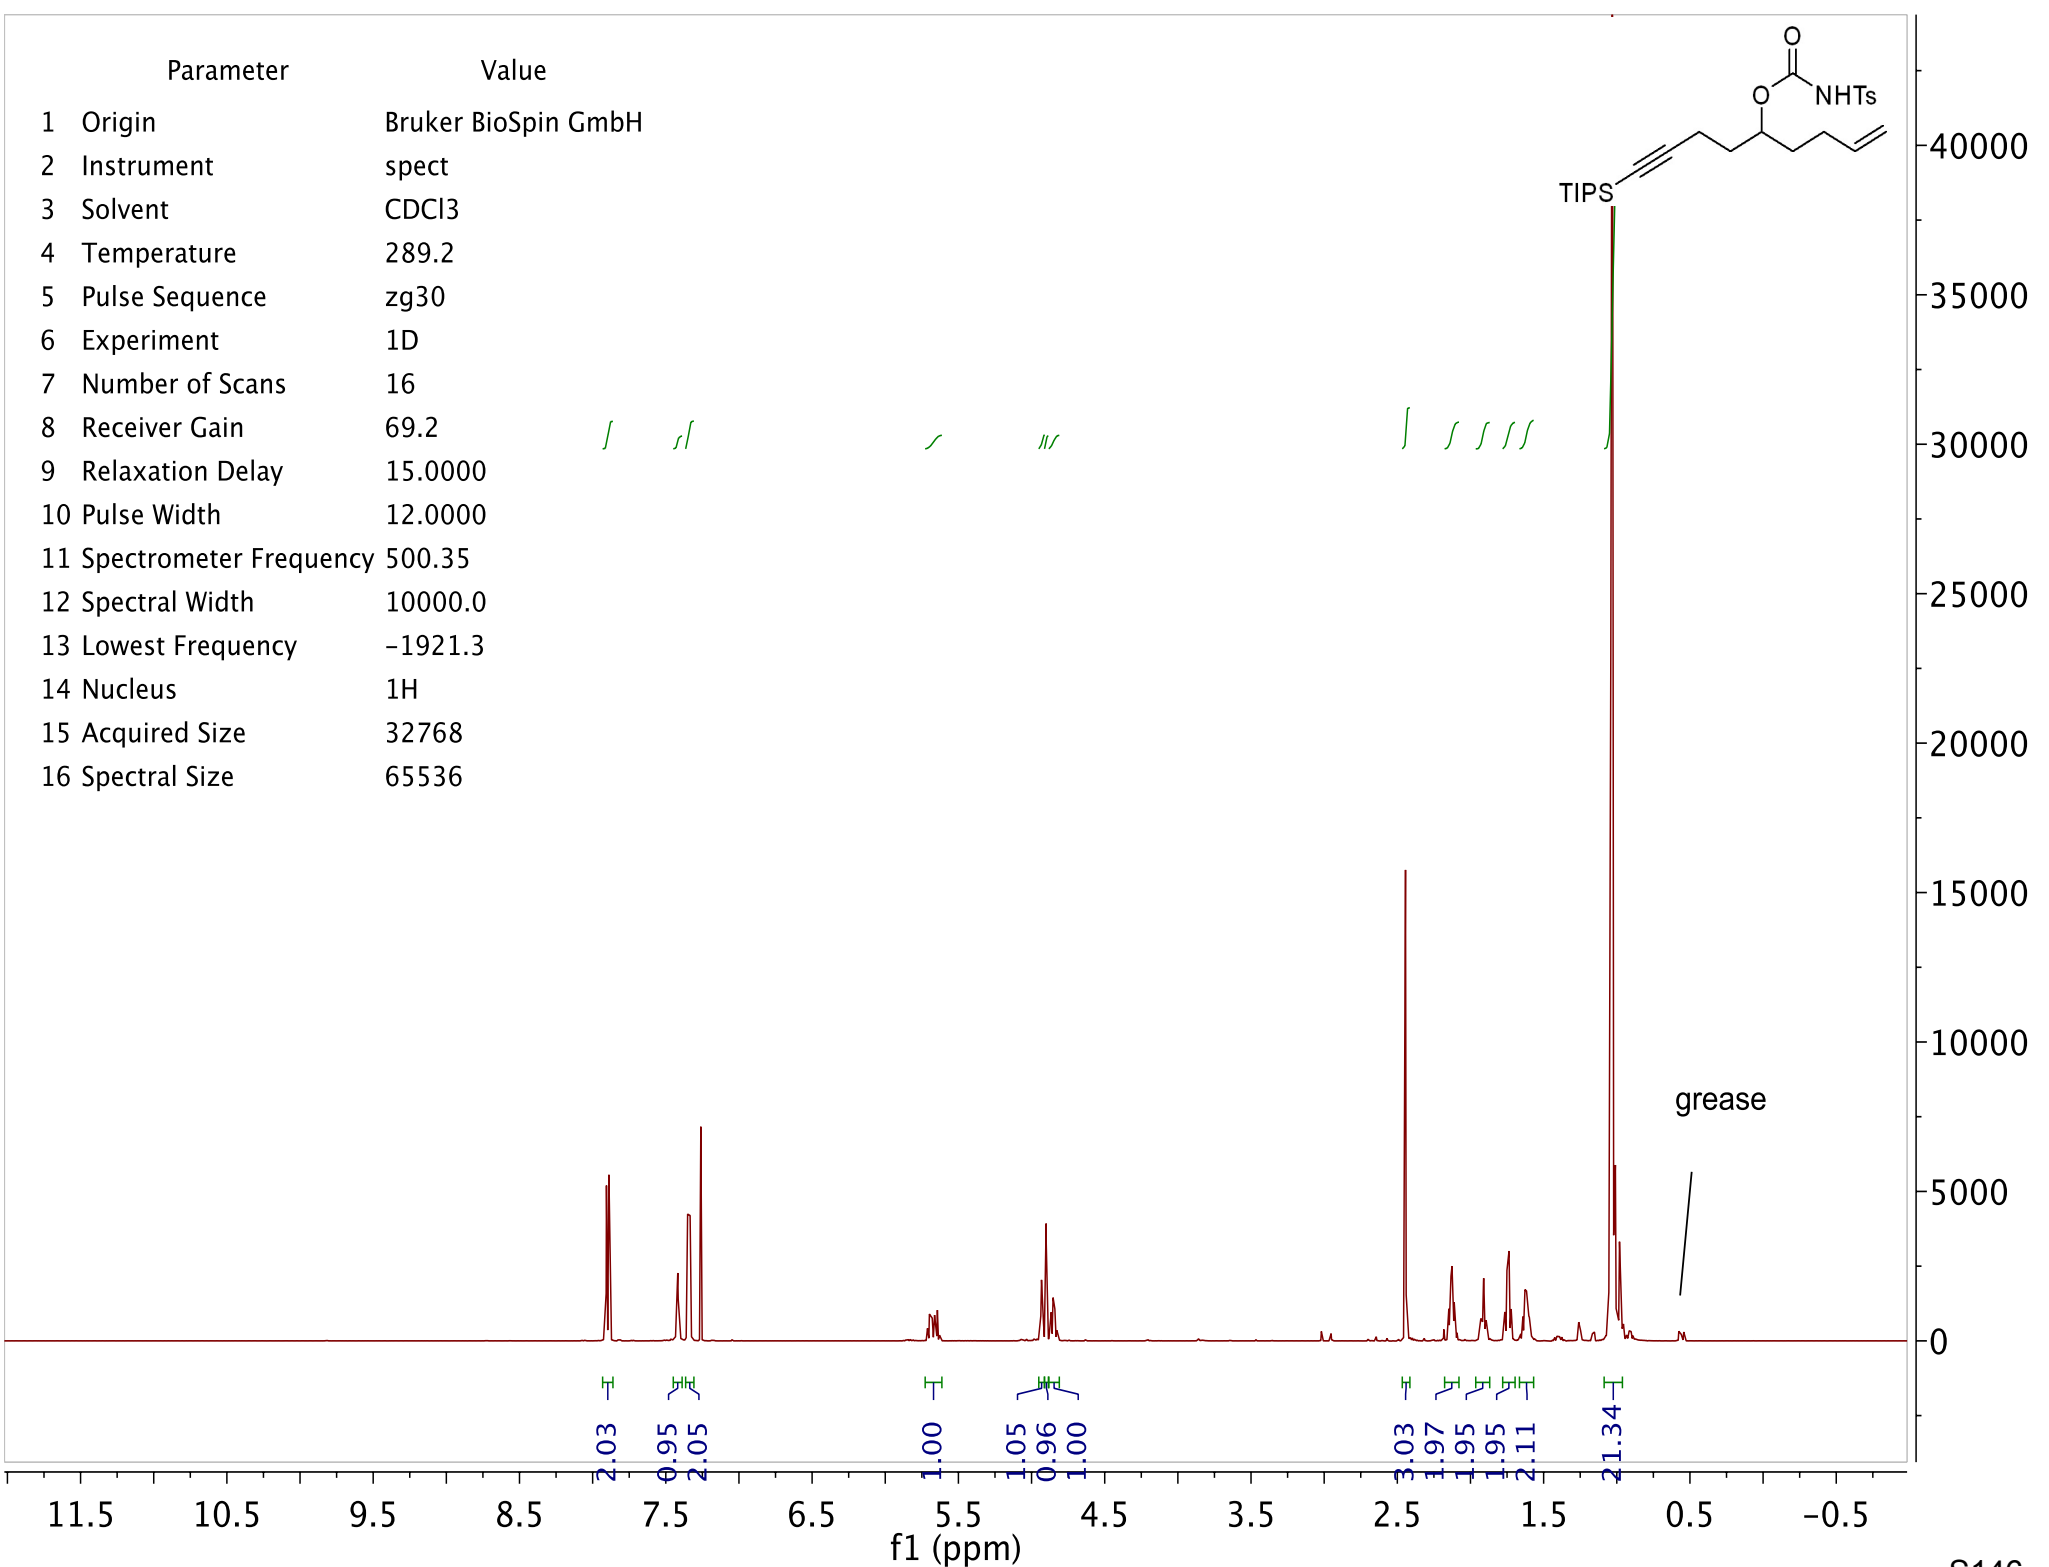

| Parameter                 | Value               |
|---------------------------|---------------------|
| 1 Origin                  | Bruker BioSpin GmbH |
| 2 Instrument              | spect               |
| 3 Solvent                 | CDCl3               |
| 4 Temperature             | 289.3               |
| 5 Pulse Sequence          | zgpg30              |
| 6 Experiment              | 1D                  |
| 7 Number of Scans         | 256                 |
| 8 Receiver Gain           | 190.5               |
| 9 Relaxation Delay        | 2.0000              |
| 10 Pulse Width            | 10.0000             |
| 11 Spectrometer Frequency | 125.83              |
| 12 Spectral Width         | 31512.6             |
| 13 Lowest Frequency       | -1902.3             |
| 14 Nucleus                | 13C                 |
| 15 Acquired Size          | 32768               |
| 16 Spectral Size          | 65536               |

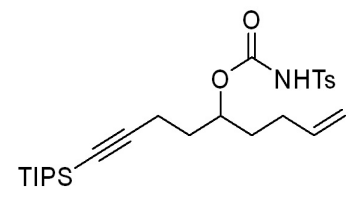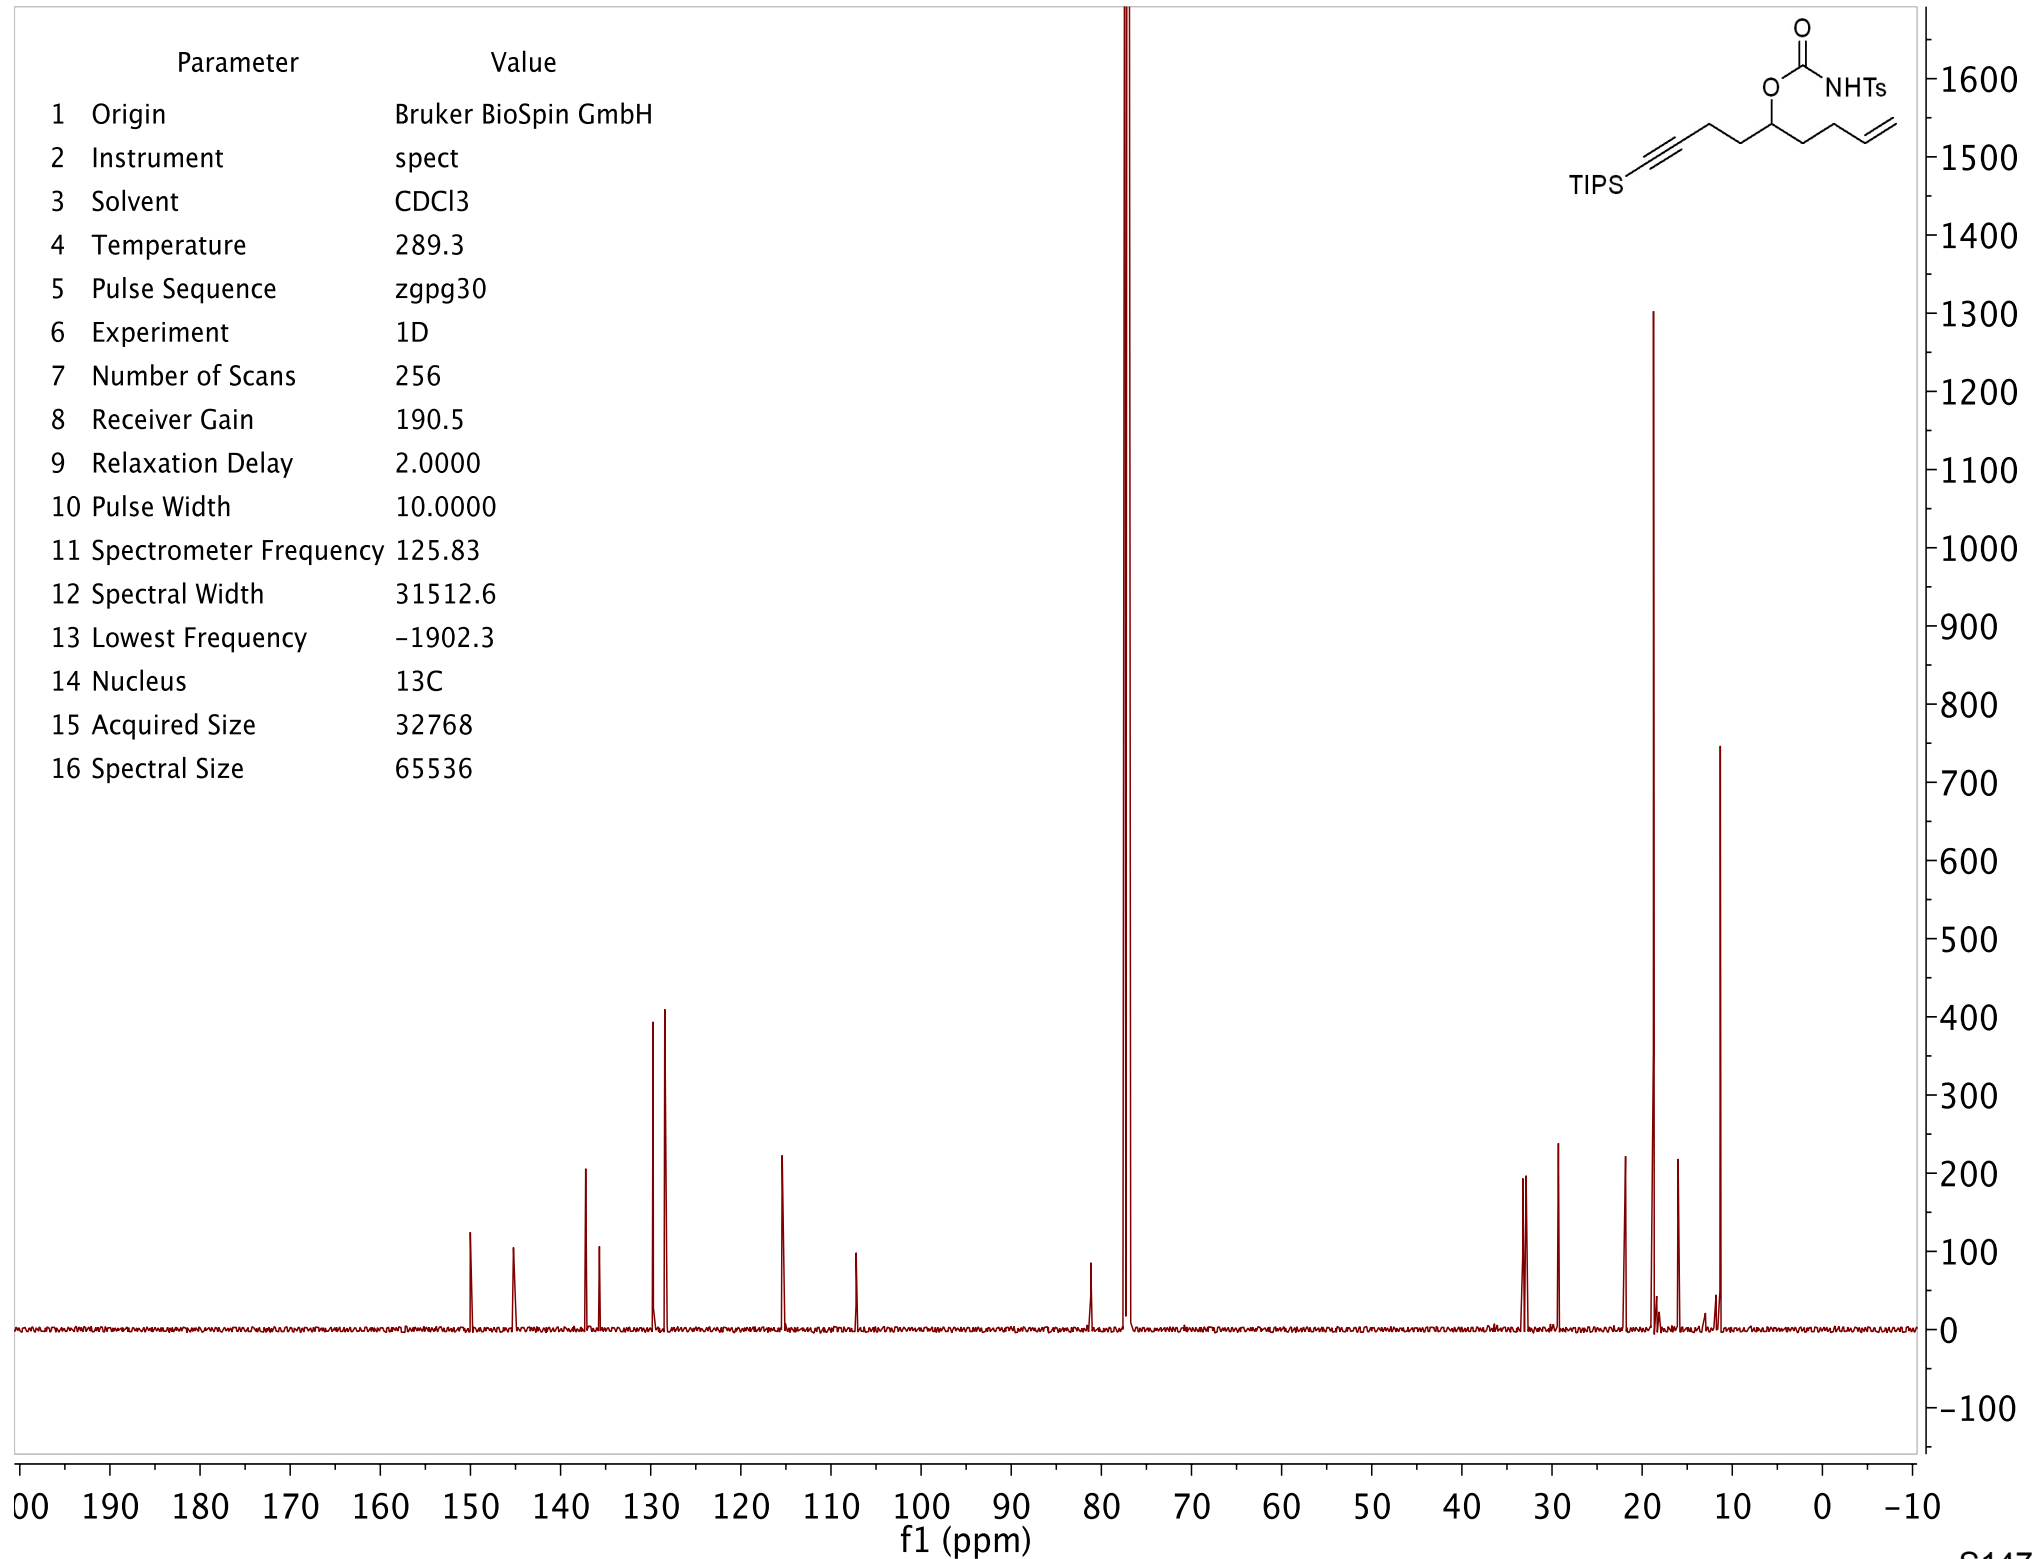

| Parameter                 | Value               |
|---------------------------|---------------------|
| 1 Origin                  | Bruker BioSpin GmbH |
| 2 Spectrometer            | spect               |
| 3 Solvent                 | CDCl3               |
| 4 Temperature             | 296.1               |
| 5 Pulse Sequence          | zg30                |
| 6 Experiment              | 1D                  |
| 7 Number of Scans         | 4                   |
| 8 Receiver Gain           | 30                  |
| 9 Relaxation Delay        | 15.0000             |
| 10 Pulse Width            | 12.0000             |
| 11 Spectrometer Frequency | 500.35              |
| 12 Spectral Width         | 10000.0             |
| 13 Lowest Frequency       | -1922.9             |
| 14 Nucleus                | 1H                  |
| 15 Acquired Size          | 32768               |
| 16 Spectral Size          | 65536               |

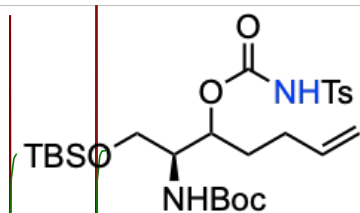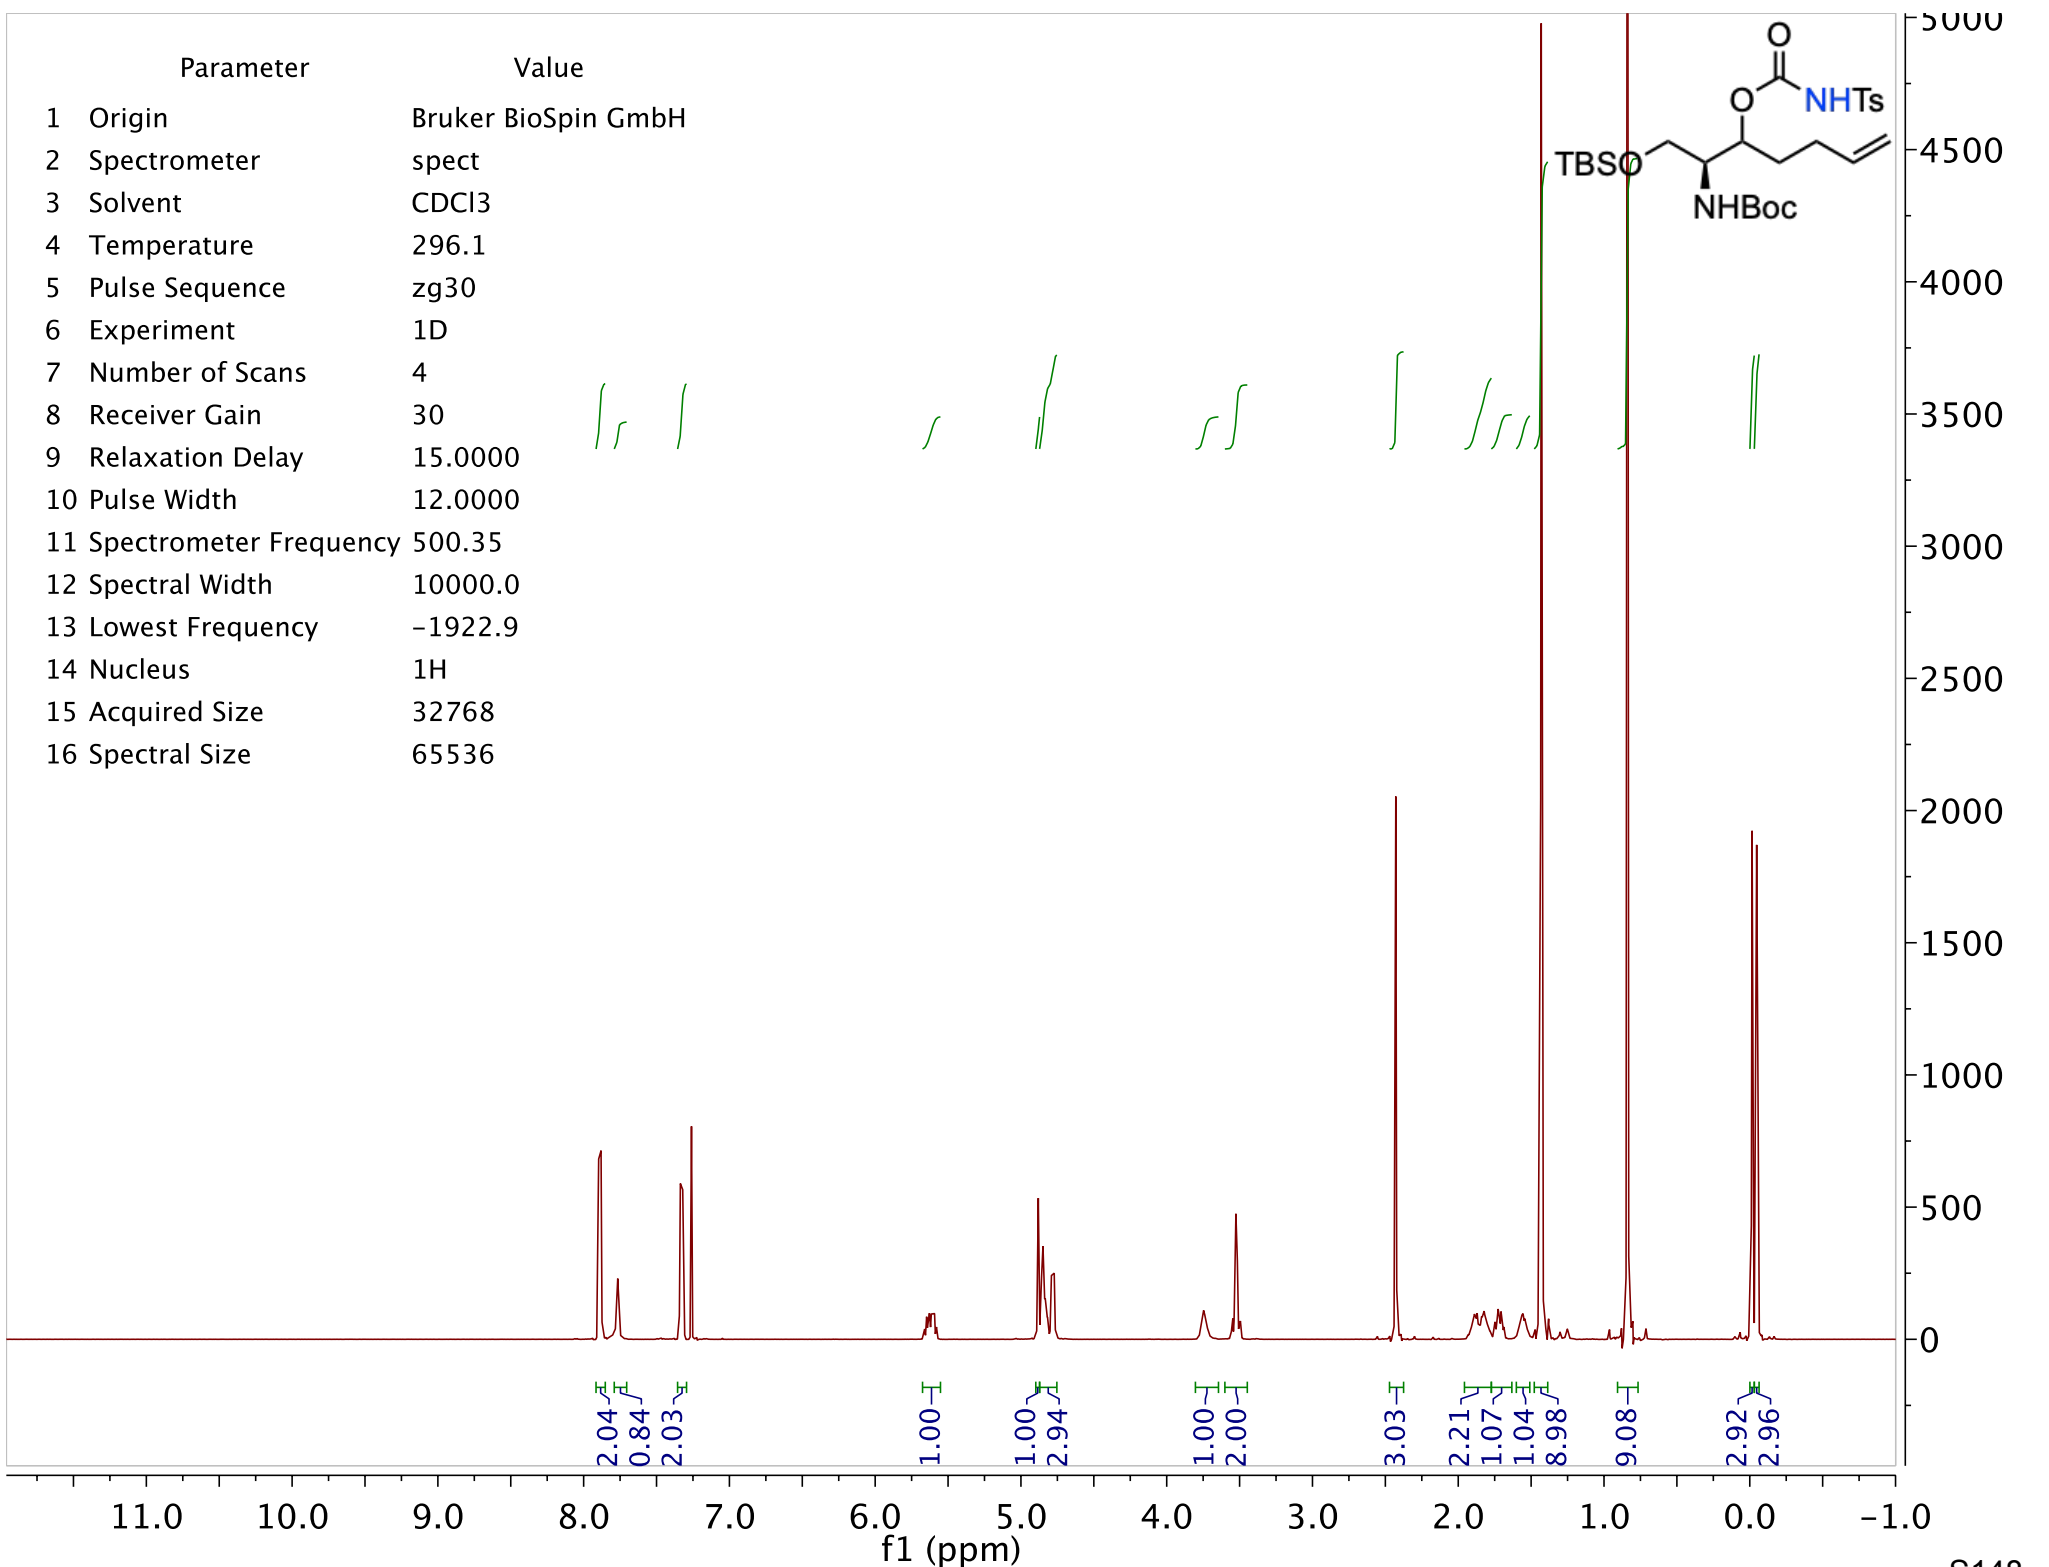

| Parameter                 | Value               |
|---------------------------|---------------------|
| 1 Origin                  | Bruker BioSpin GmbH |
| 2 Spectrometer            | spect               |
| 3 Solvent                 | CDCl3               |
| 4 Temperature             | 296.1               |
| 5 Pulse Sequence          | zgpg30              |
| 6 Experiment              | 1D                  |
| 7 Number of Scans         | 800                 |
| 8 Receiver Gain           | 191                 |
| 9 Relaxation Delay        | 1.0000              |
| 10 Pulse Width            | 10.0000             |
| 11 Spectrometer Frequency | 125.83              |
| 12 Spectral Width         | 31512.6             |
| 13 Lowest Frequency       | -1900.4             |
| 14 Nucleus                | 13C                 |
| 15 Acquired Size          | 32768               |
| 16 Spectral Size          | 65536               |

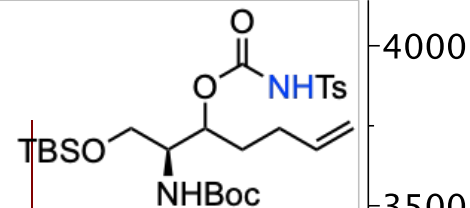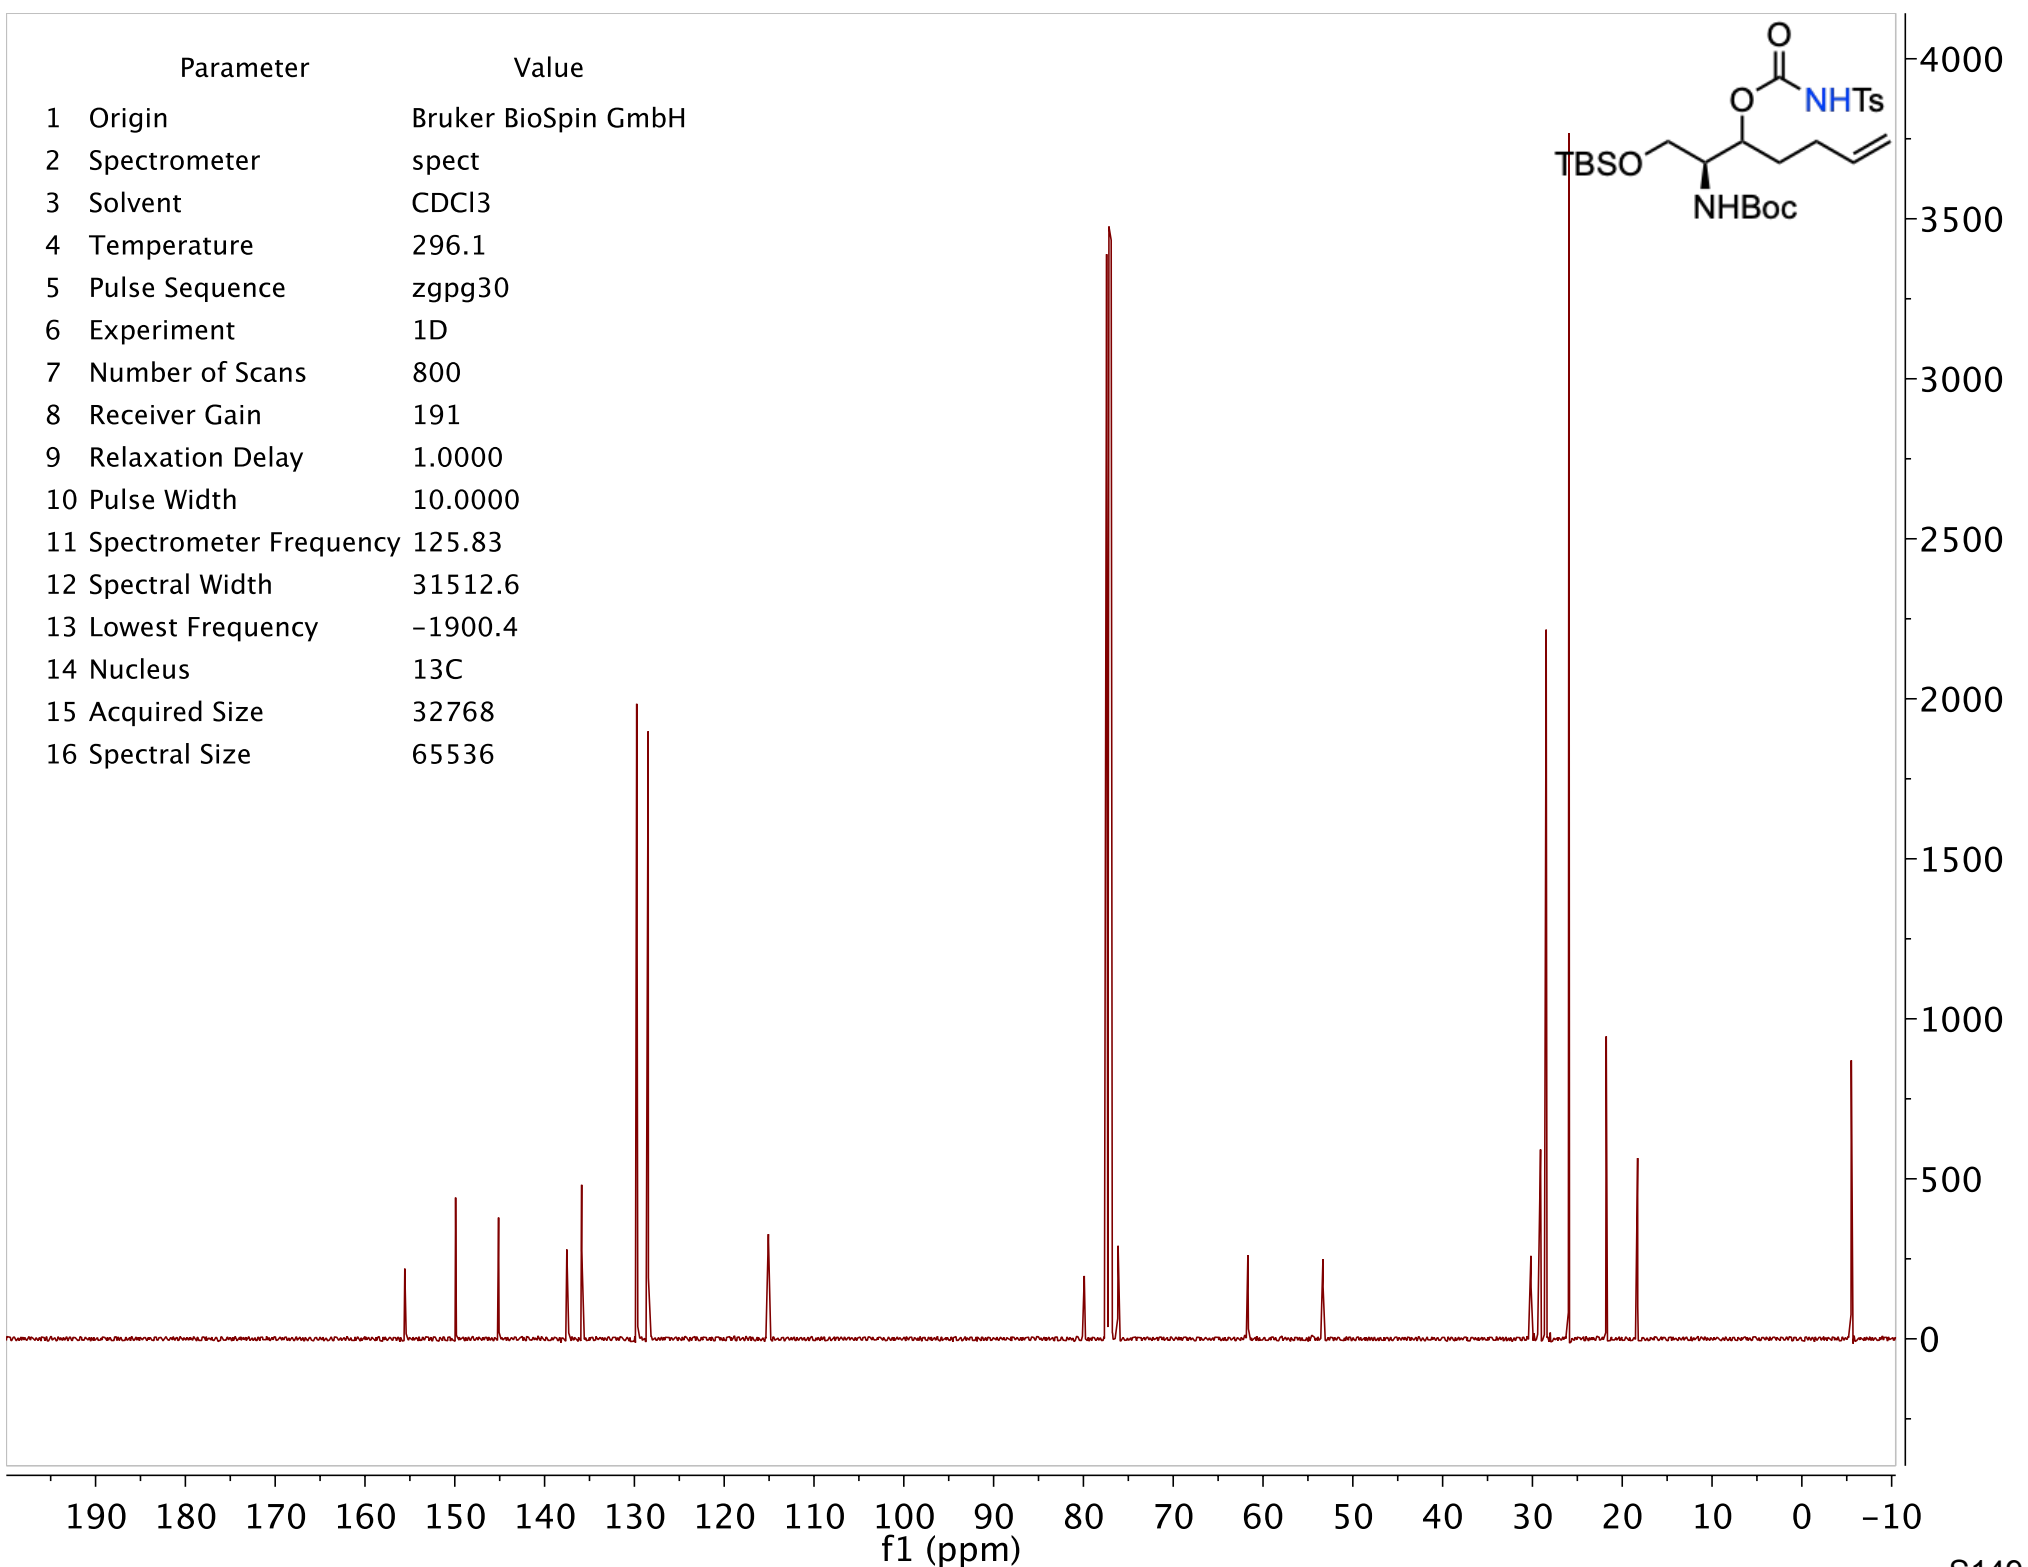

| Parameter                 | Value               |
|---------------------------|---------------------|
| 1 Origin                  | Bruker BioSpin GmbH |
| 2 Instrument              | spect               |
| 3 Solvent                 | CDCl3               |
| 4 Temperature             | 298.1               |
| 5 Pulse Sequence          | zg30                |
| 6 Experiment              | 1D                  |
| 7 Number of Scans         | 16                  |
| 8 Receiver Gain           | 94.3                |
| 9 Relaxation Delay        | 15.0000             |
| 10 Pulse Width            | 12.0000             |
| 11 Spectrometer Frequency | 500.35              |
| 12 Spectral Width         | 10000.0             |
| 13 Lowest Frequency       | -1921.3             |
| 14 Nucleus                | 1H                  |
| 15 Acquired Size          | 32768               |
| 16 Spectral Size          | 65536               |

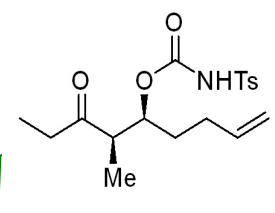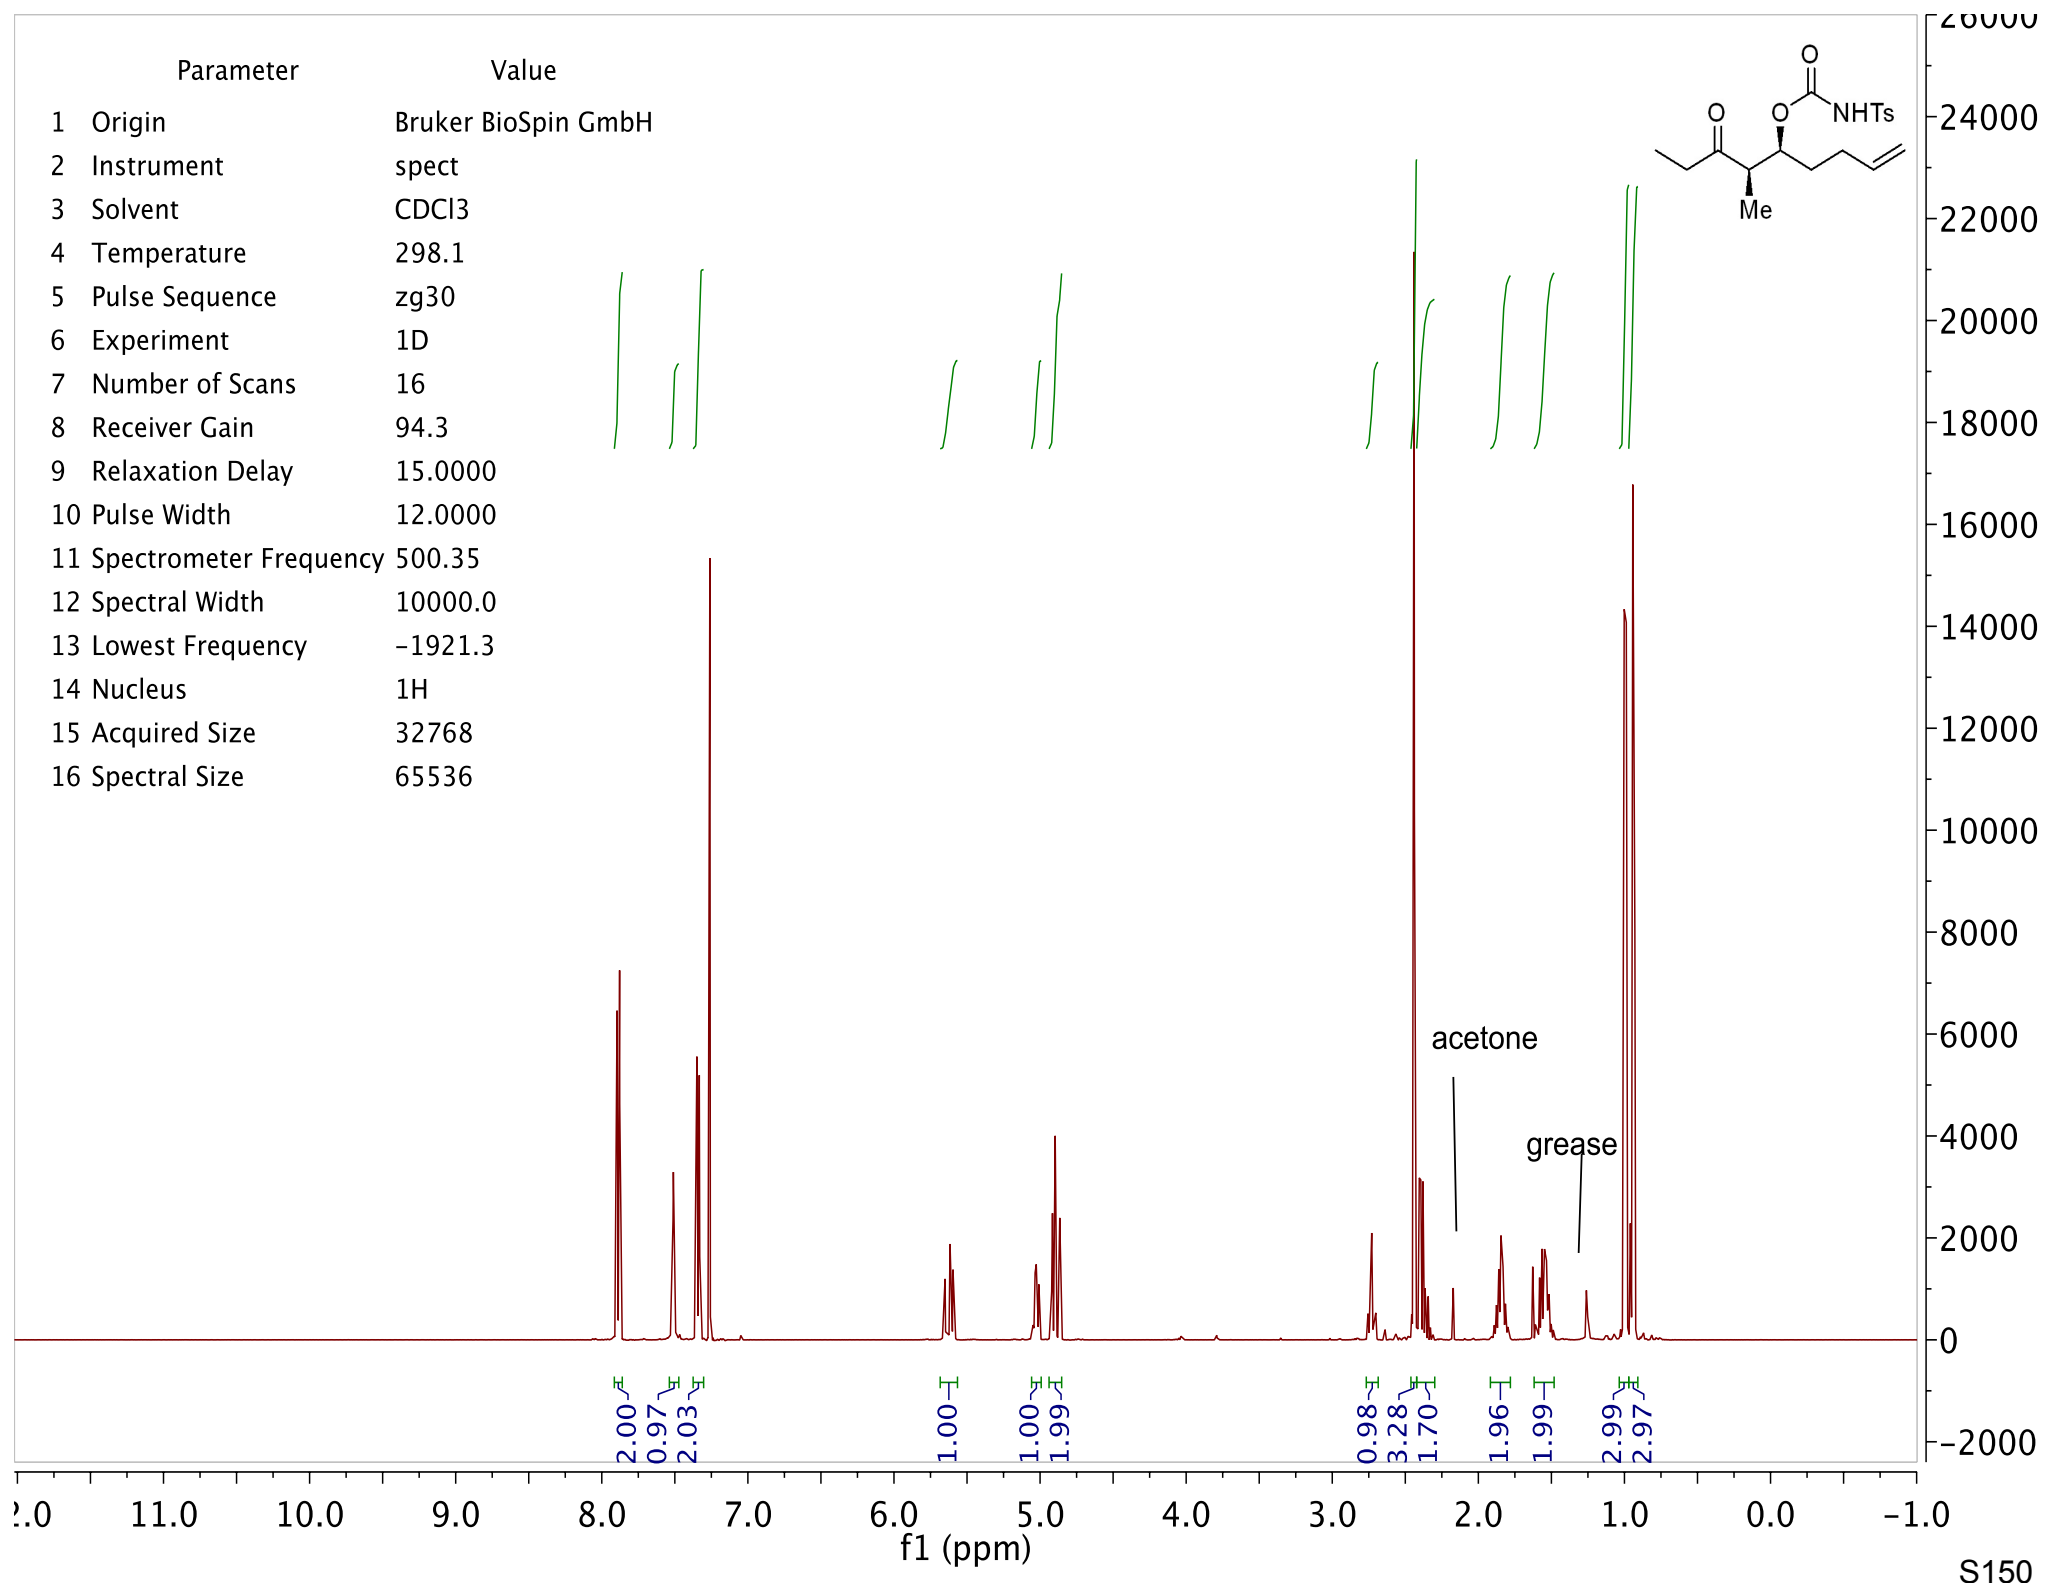



| Parameter                 | Value               |
|---------------------------|---------------------|
| 1 Origin                  | Bruker BioSpin GmbH |
| 2 Instrument              | spect               |
| 3 Solvent                 | CDCl3               |
| 4 Temperature             | 298.2               |
| 5 Pulse Sequence          | zgpg30              |
| 6 Experiment              | 1D                  |
| 7 Number of Scans         | 2056                |
| 8 Receiver Gain           | 190.5               |
| 9 Relaxation Delay        | 2.0000              |
| 10 Pulse Width            | 10.0000             |
| 11 Spectrometer Frequency | 125.83              |
| 12 Spectral Width         | 31512.6             |
| 13 Lowest Frequency       | -1898.4             |
| 14 Nucleus                | 13C                 |
| 15 Acquired Size          | 32768               |
| 16 Spectral Size          | 65536               |

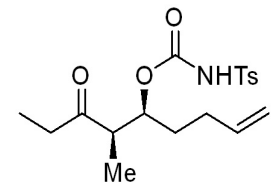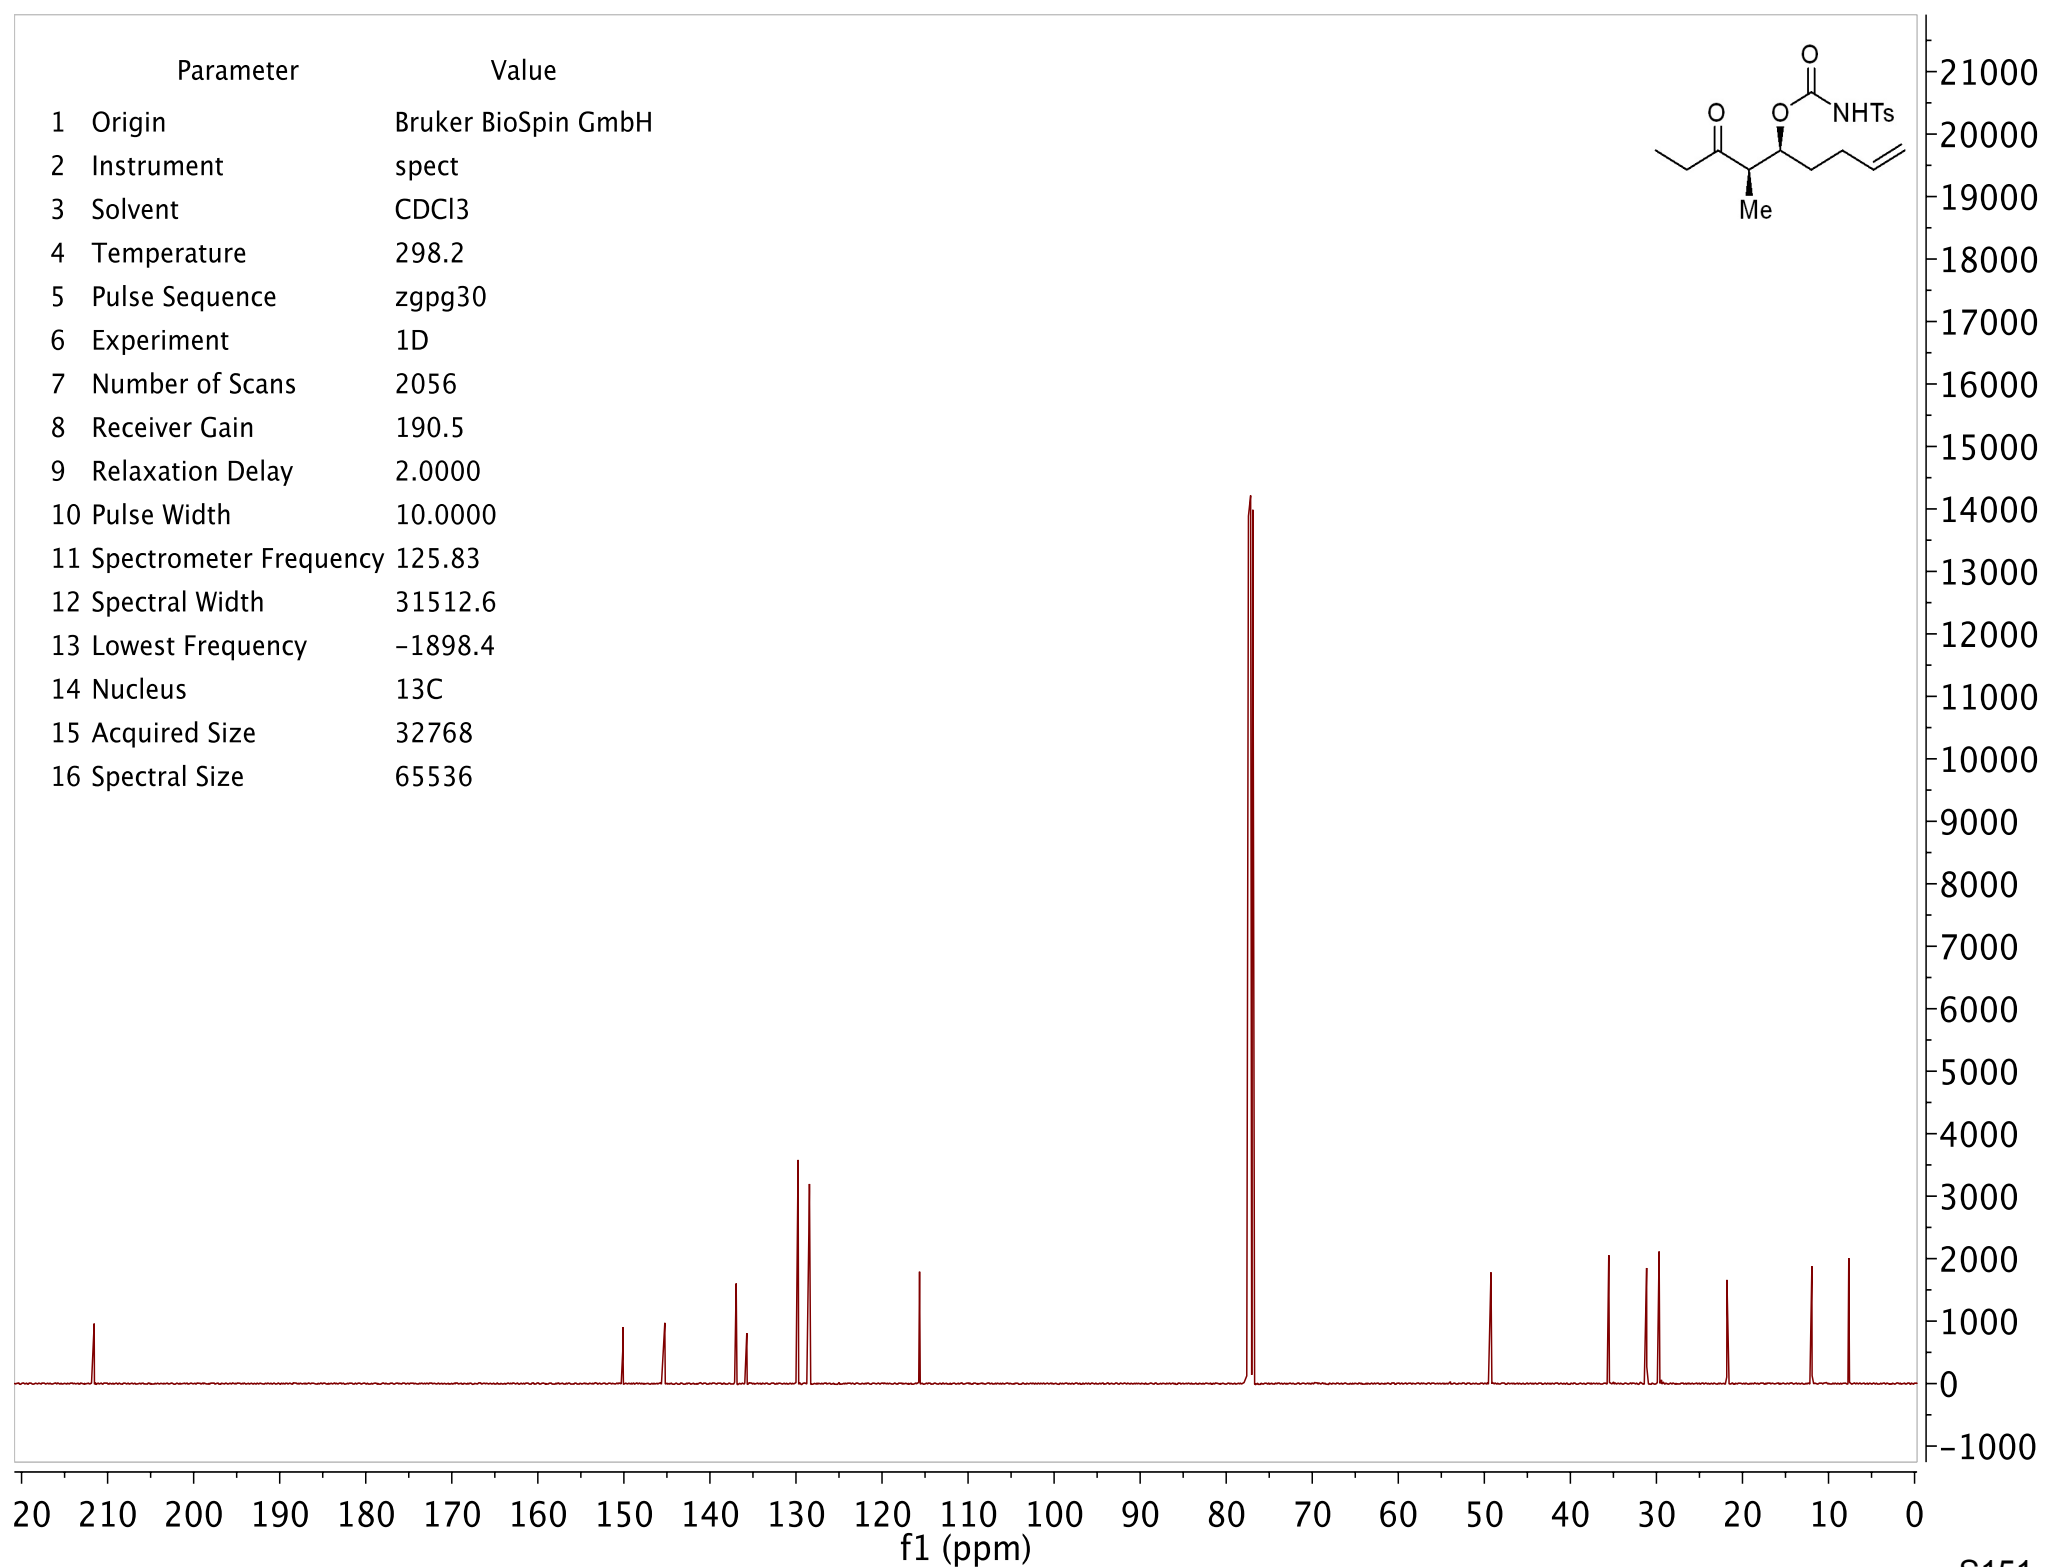

| Parameter                 | Value               |
|---------------------------|---------------------|
| 1 Origin                  | Bruker BioSpin GmbH |
| 2 Instrument              | spect               |
| 3 Solvent                 | CDCl3               |
| 4 Temperature             | 298.0               |
| 5 Pulse Sequence          | zg30                |
| 6 Experiment              | 1D                  |
| 7 Number of Scans         | 16                  |
| 8 Receiver Gain           | 29.7                |
| 9 Relaxation Delay        | 15.0000             |
| 10 Pulse Width            | 12.0000             |
| 11 Spectrometer Frequency | 500.35              |
| 12 Spectral Width         | 10000.0             |
| 13 Lowest Frequency       | -1922.3             |
| 14 Nucleus                | 1H                  |
| 15 Acquired Size          | 32768               |
| 16 Spectral Size          | 65536               |

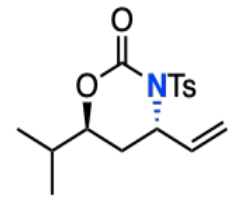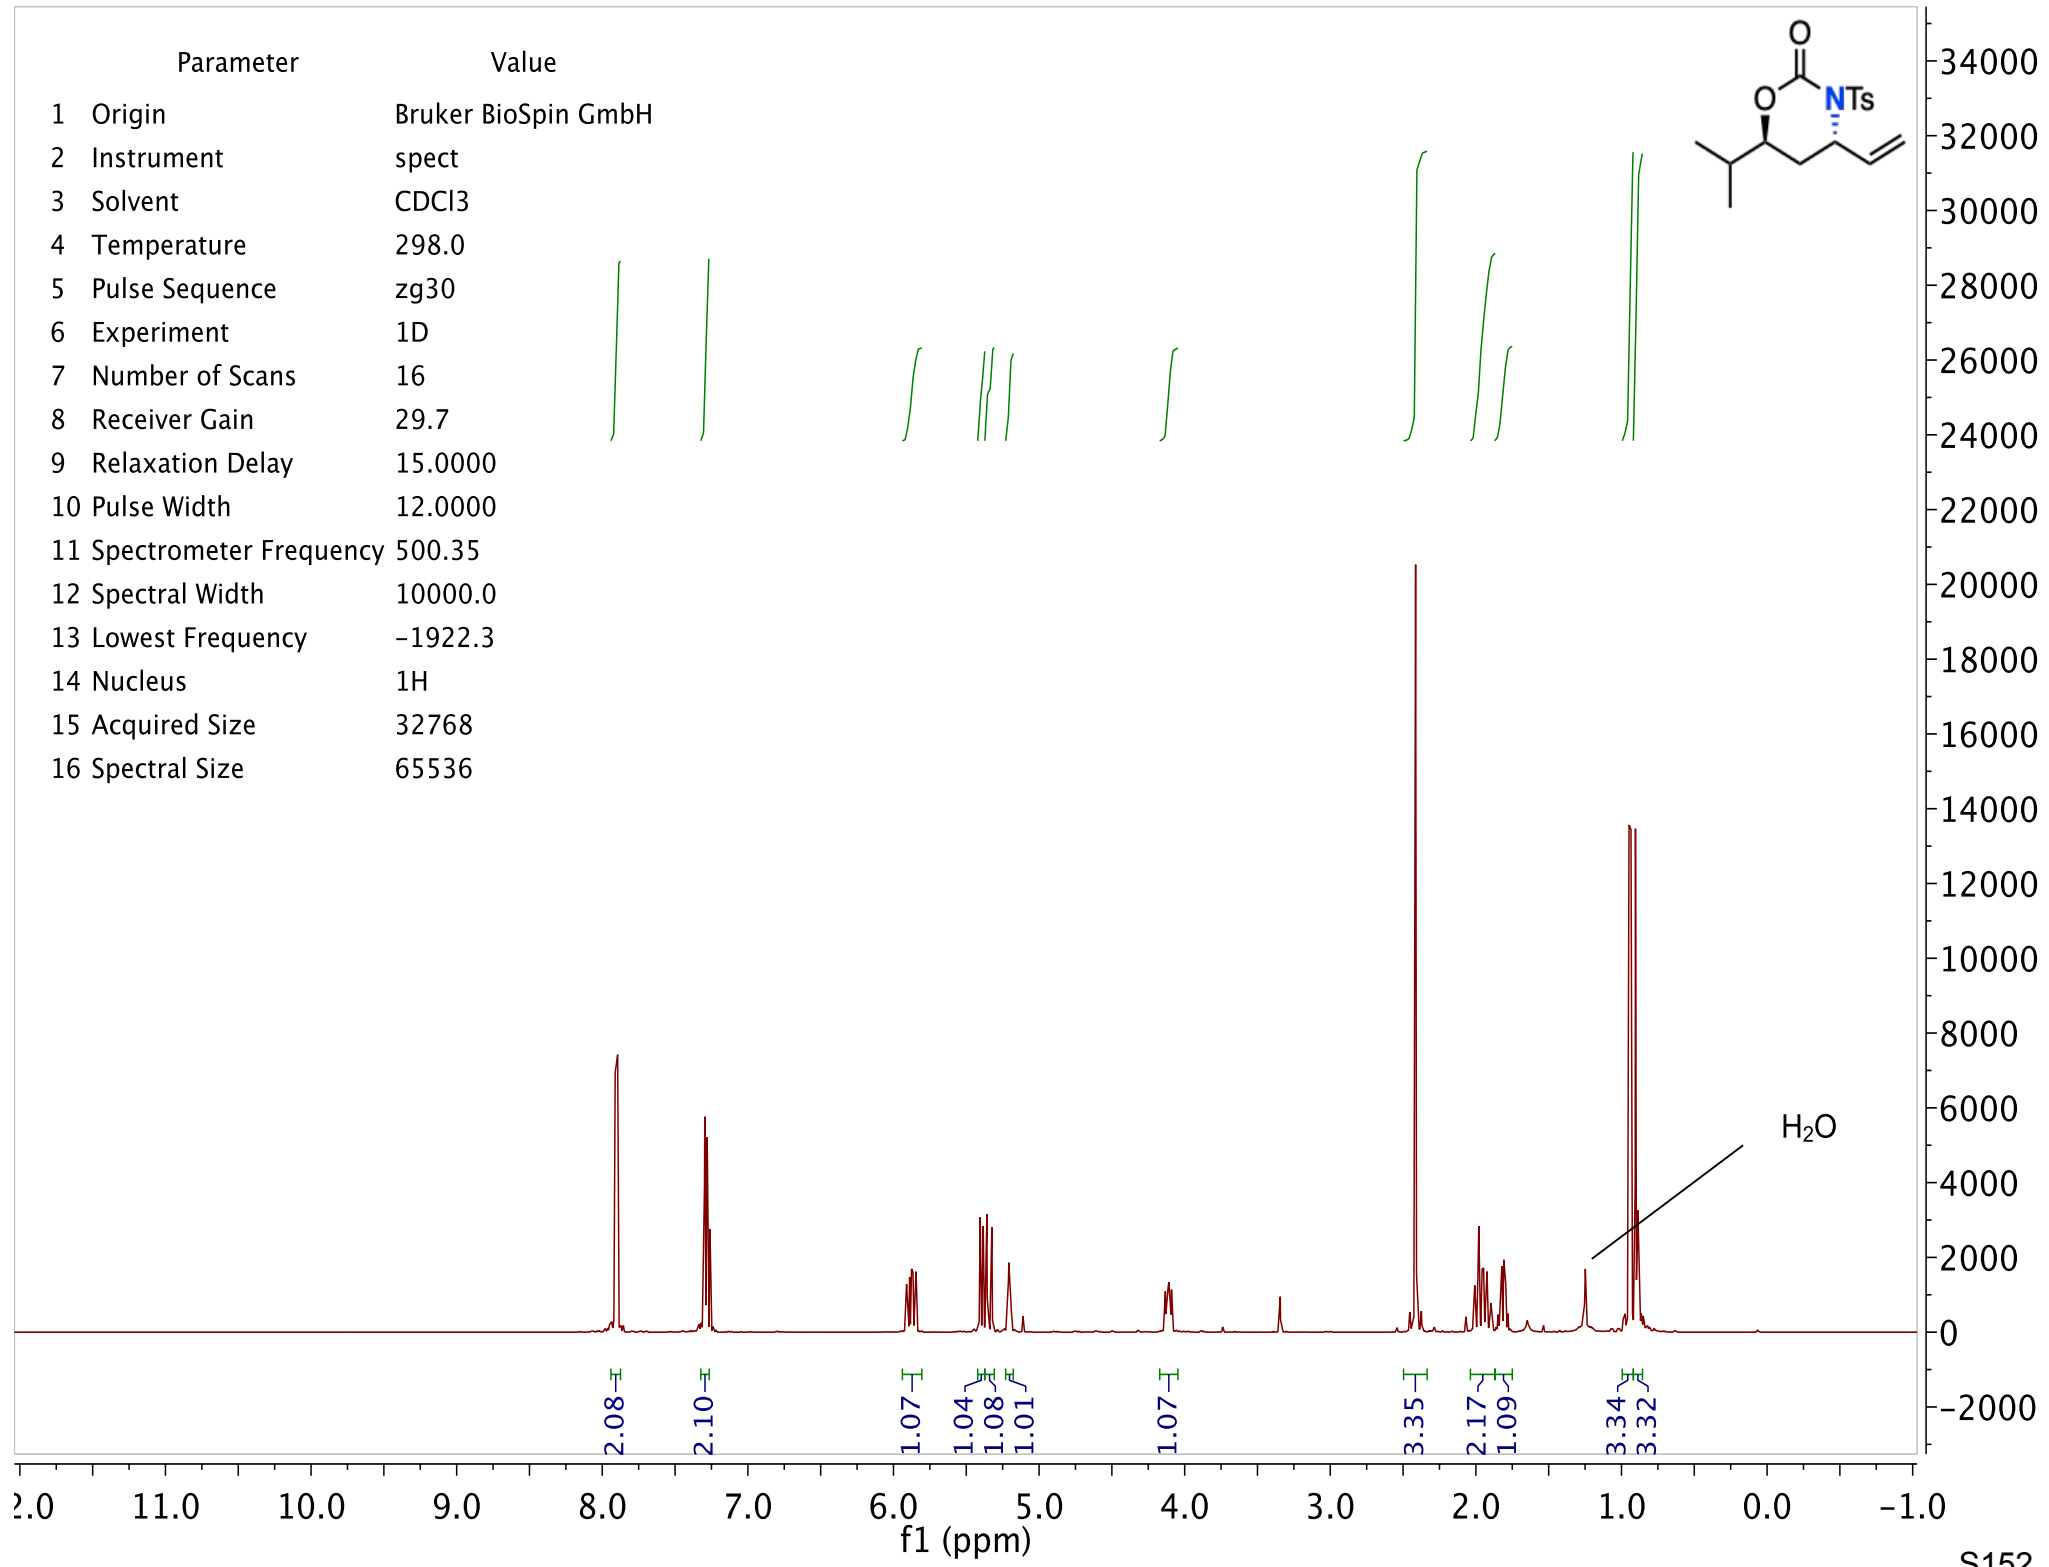

| Parameter                 | Value               |
|---------------------------|---------------------|
| 1 Origin                  | Bruker BioSpin GmbH |
| 2 Instrument              | spect               |
| 3 Solvent                 | CDCl3               |
| 4 Temperature             | 298.0               |
| 5 Pulse Sequence          | zgpg30              |
| 6 Experiment              | 1D                  |
| 7 Number of Scans         | 256                 |
| 8 Receiver Gain           | 190.5               |
| 9 Relaxation Delay        | 2.0000              |
| 10 Pulse Width            | 10.0000             |
| 11 Spectrometer Frequency | 125.83              |
| 12 Spectral Width         | 31512.6             |
| 13 Lowest Frequency       | -1904.5             |
| 14 Nucleus                | 13C                 |
| 15 Acquired Size          | 32768               |
| 16 Spectral Size          | 65536               |

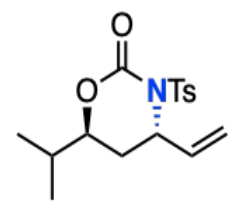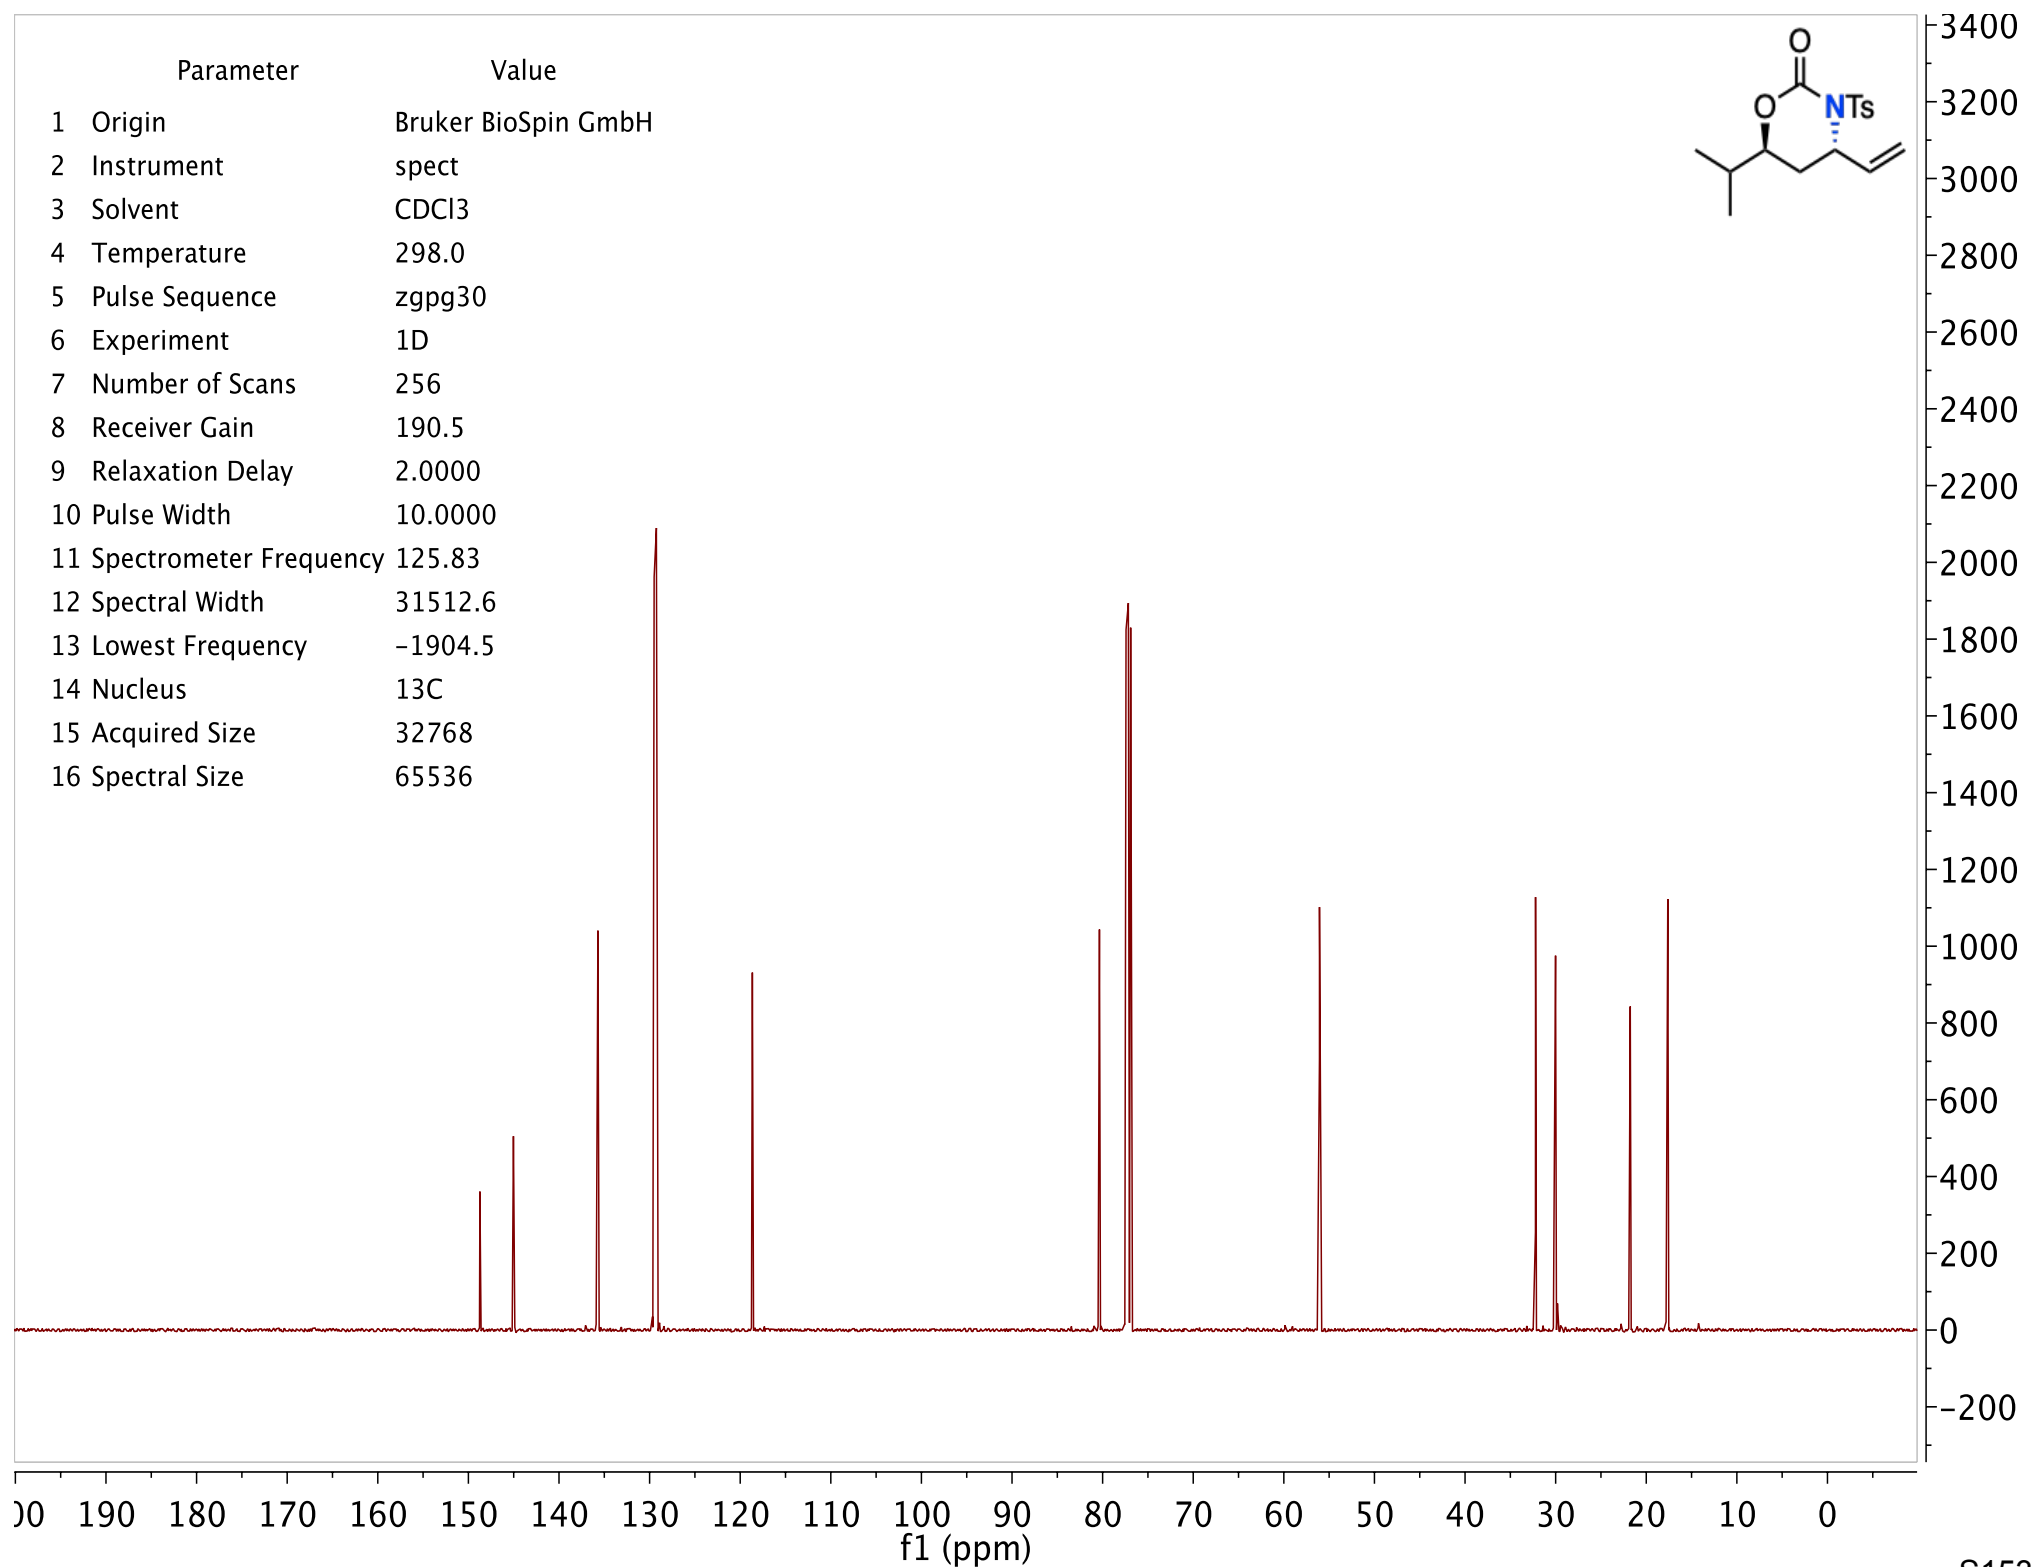

| Parameter                 | Value   |
|---------------------------|---------|
| 1 Origin                  | Varian  |
| 2 Instrument              | inova   |
| 3 Solvent                 | CDCl3   |
| 4 Temperature             | 20.0    |
| 5 Pulse Sequence          | s2pul   |
| 6 Experiment              | 1D      |
| 7 Number of Scans         | 8       |
| 8 Receiver Gain           | 56      |
| 9 Relaxation Delay        | 15.0000 |
| 10 Pulse Width            | 6.5000  |
| 11 Spectrometer Frequency | 499.69  |
| 12 Spectral Width         | 7024.9  |
| 13 Lowest Frequency       | -1021.9 |
| 14 Nucleus                | 1H      |
| 15 Acquired Size          | 32768   |
| 16 Spectral Size          | 65536   |

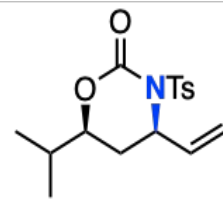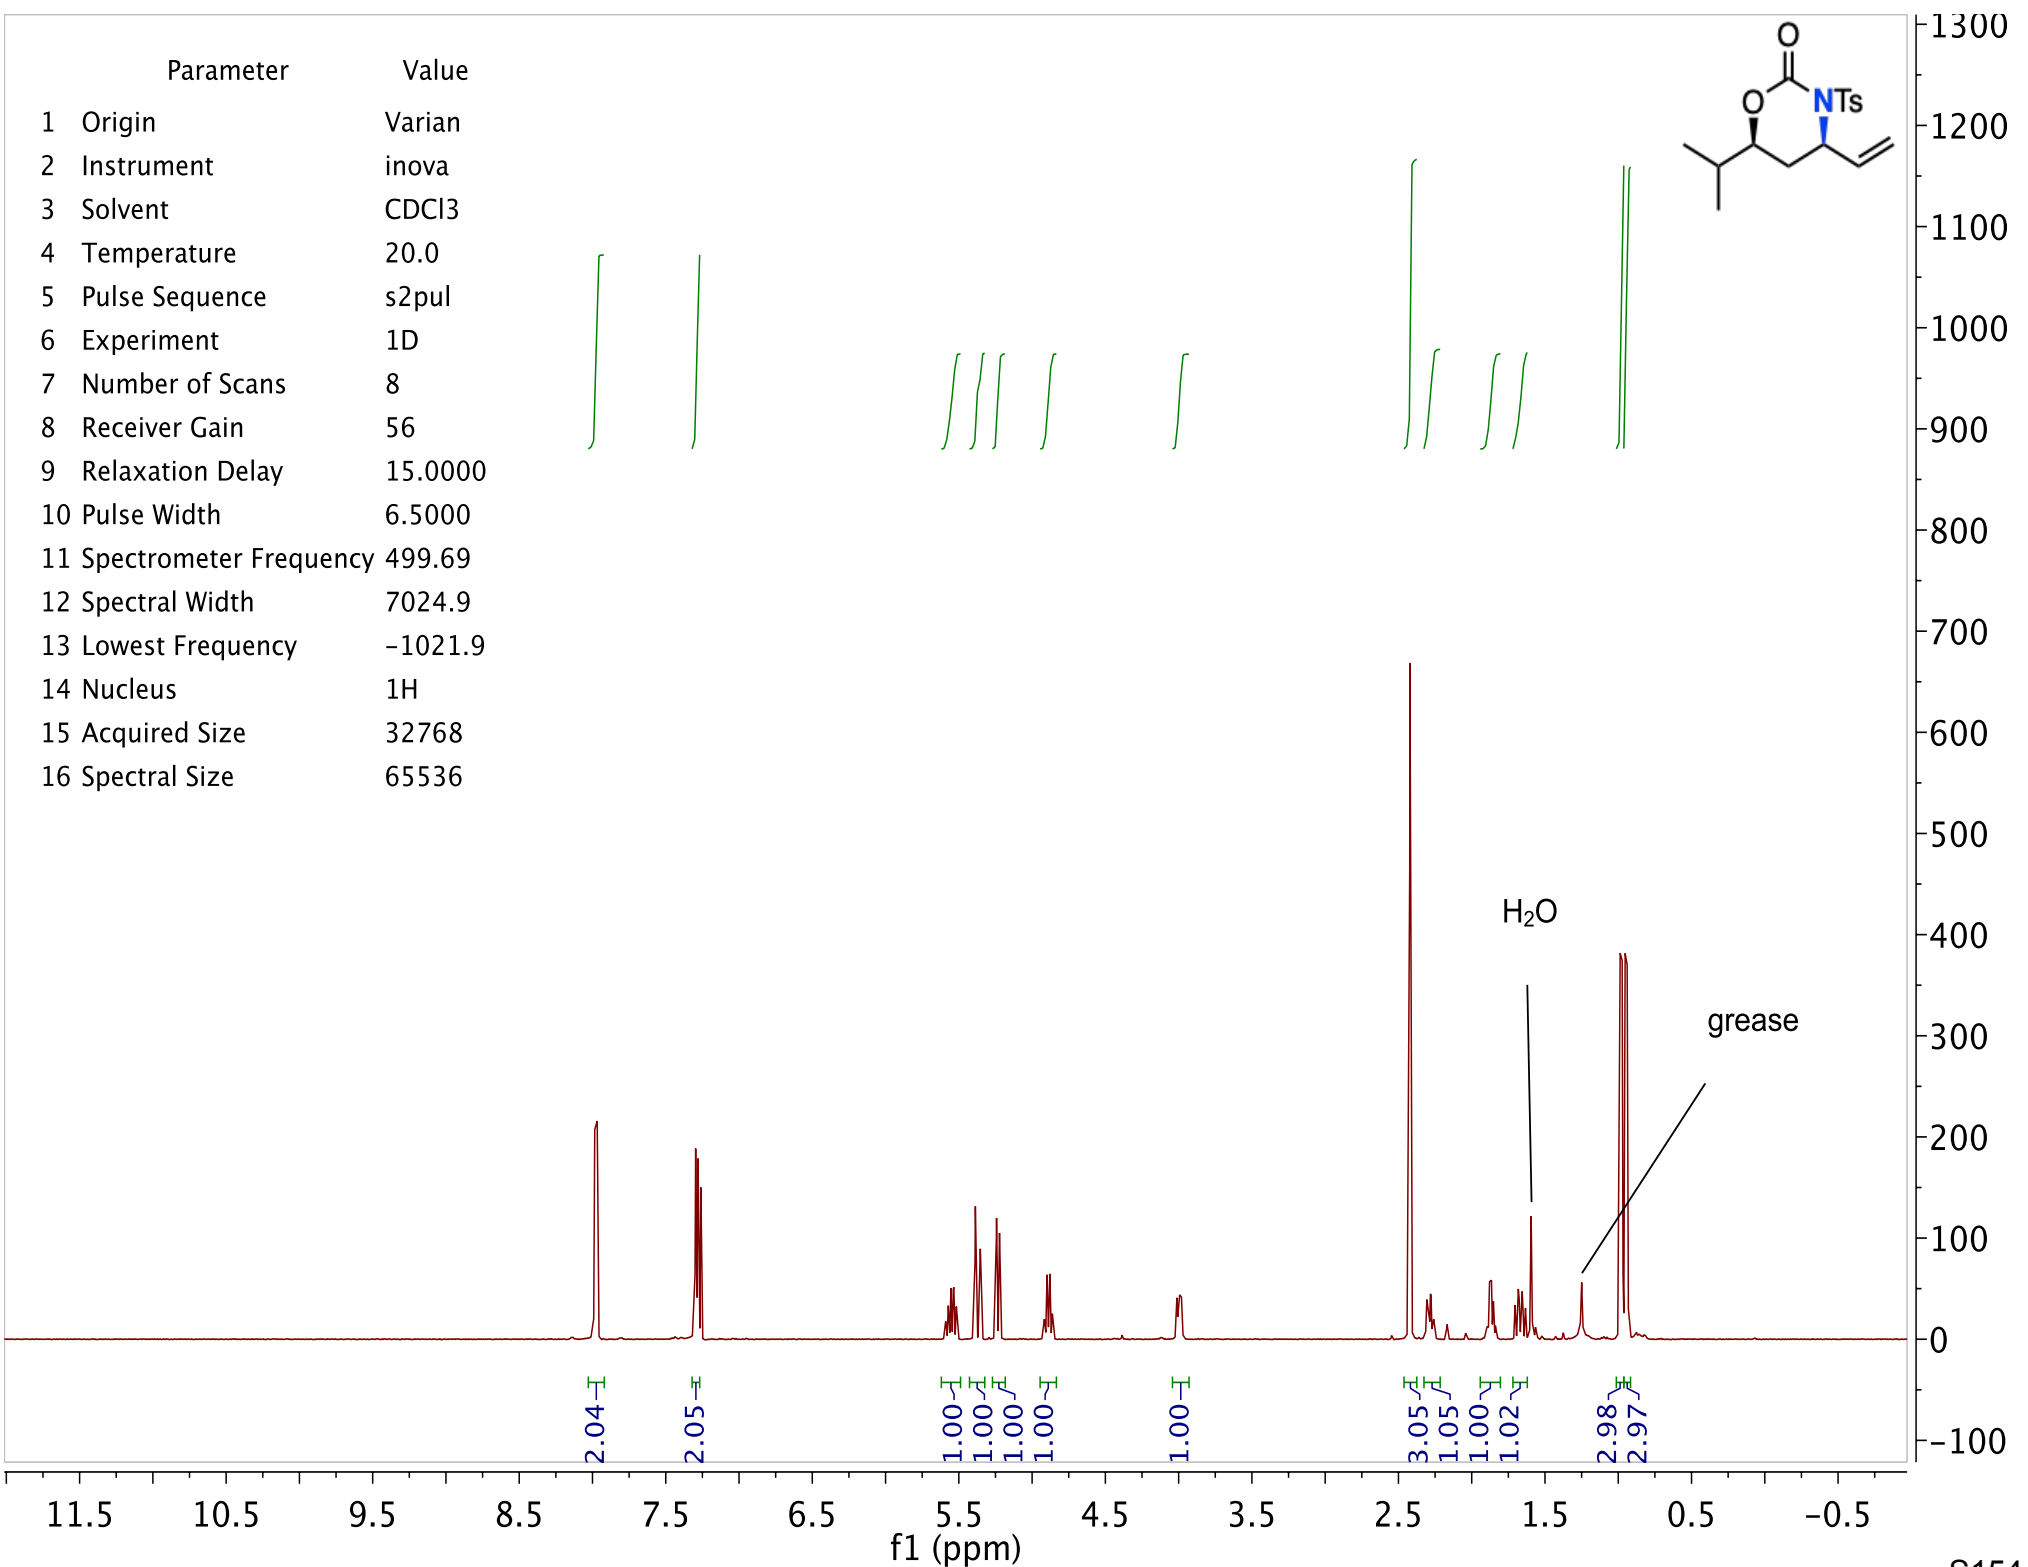

| Parameter                 | Value               |
|---------------------------|---------------------|
| 1 Origin                  | Bruker BioSpin GmbH |
| 2 Spectrometer            | spect               |
| 3 Solvent                 | CDCl3               |
| 4 Temperature             | 296.1               |
| 5 Pulse Sequence          | zgpg30              |
| 6 Experiment              | 1D                  |
| 7 Number of Scans         | 800                 |
| 8 Receiver Gain           | 191                 |
| 9 Relaxation Delay        | 1.0000              |
| 10 Pulse Width            | 10.0000             |
| 11 Spectrometer Frequency | 125.83              |
| 12 Spectral Width         | 31512.6             |
| 13 Lowest Frequency       | -1902.6             |
| 14 Nucleus                | 13C                 |
| 15 Acquired Size          | 32768               |
| 16 Spectral Size          | 65536               |

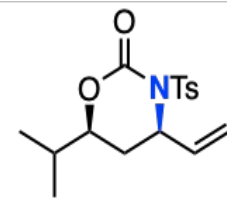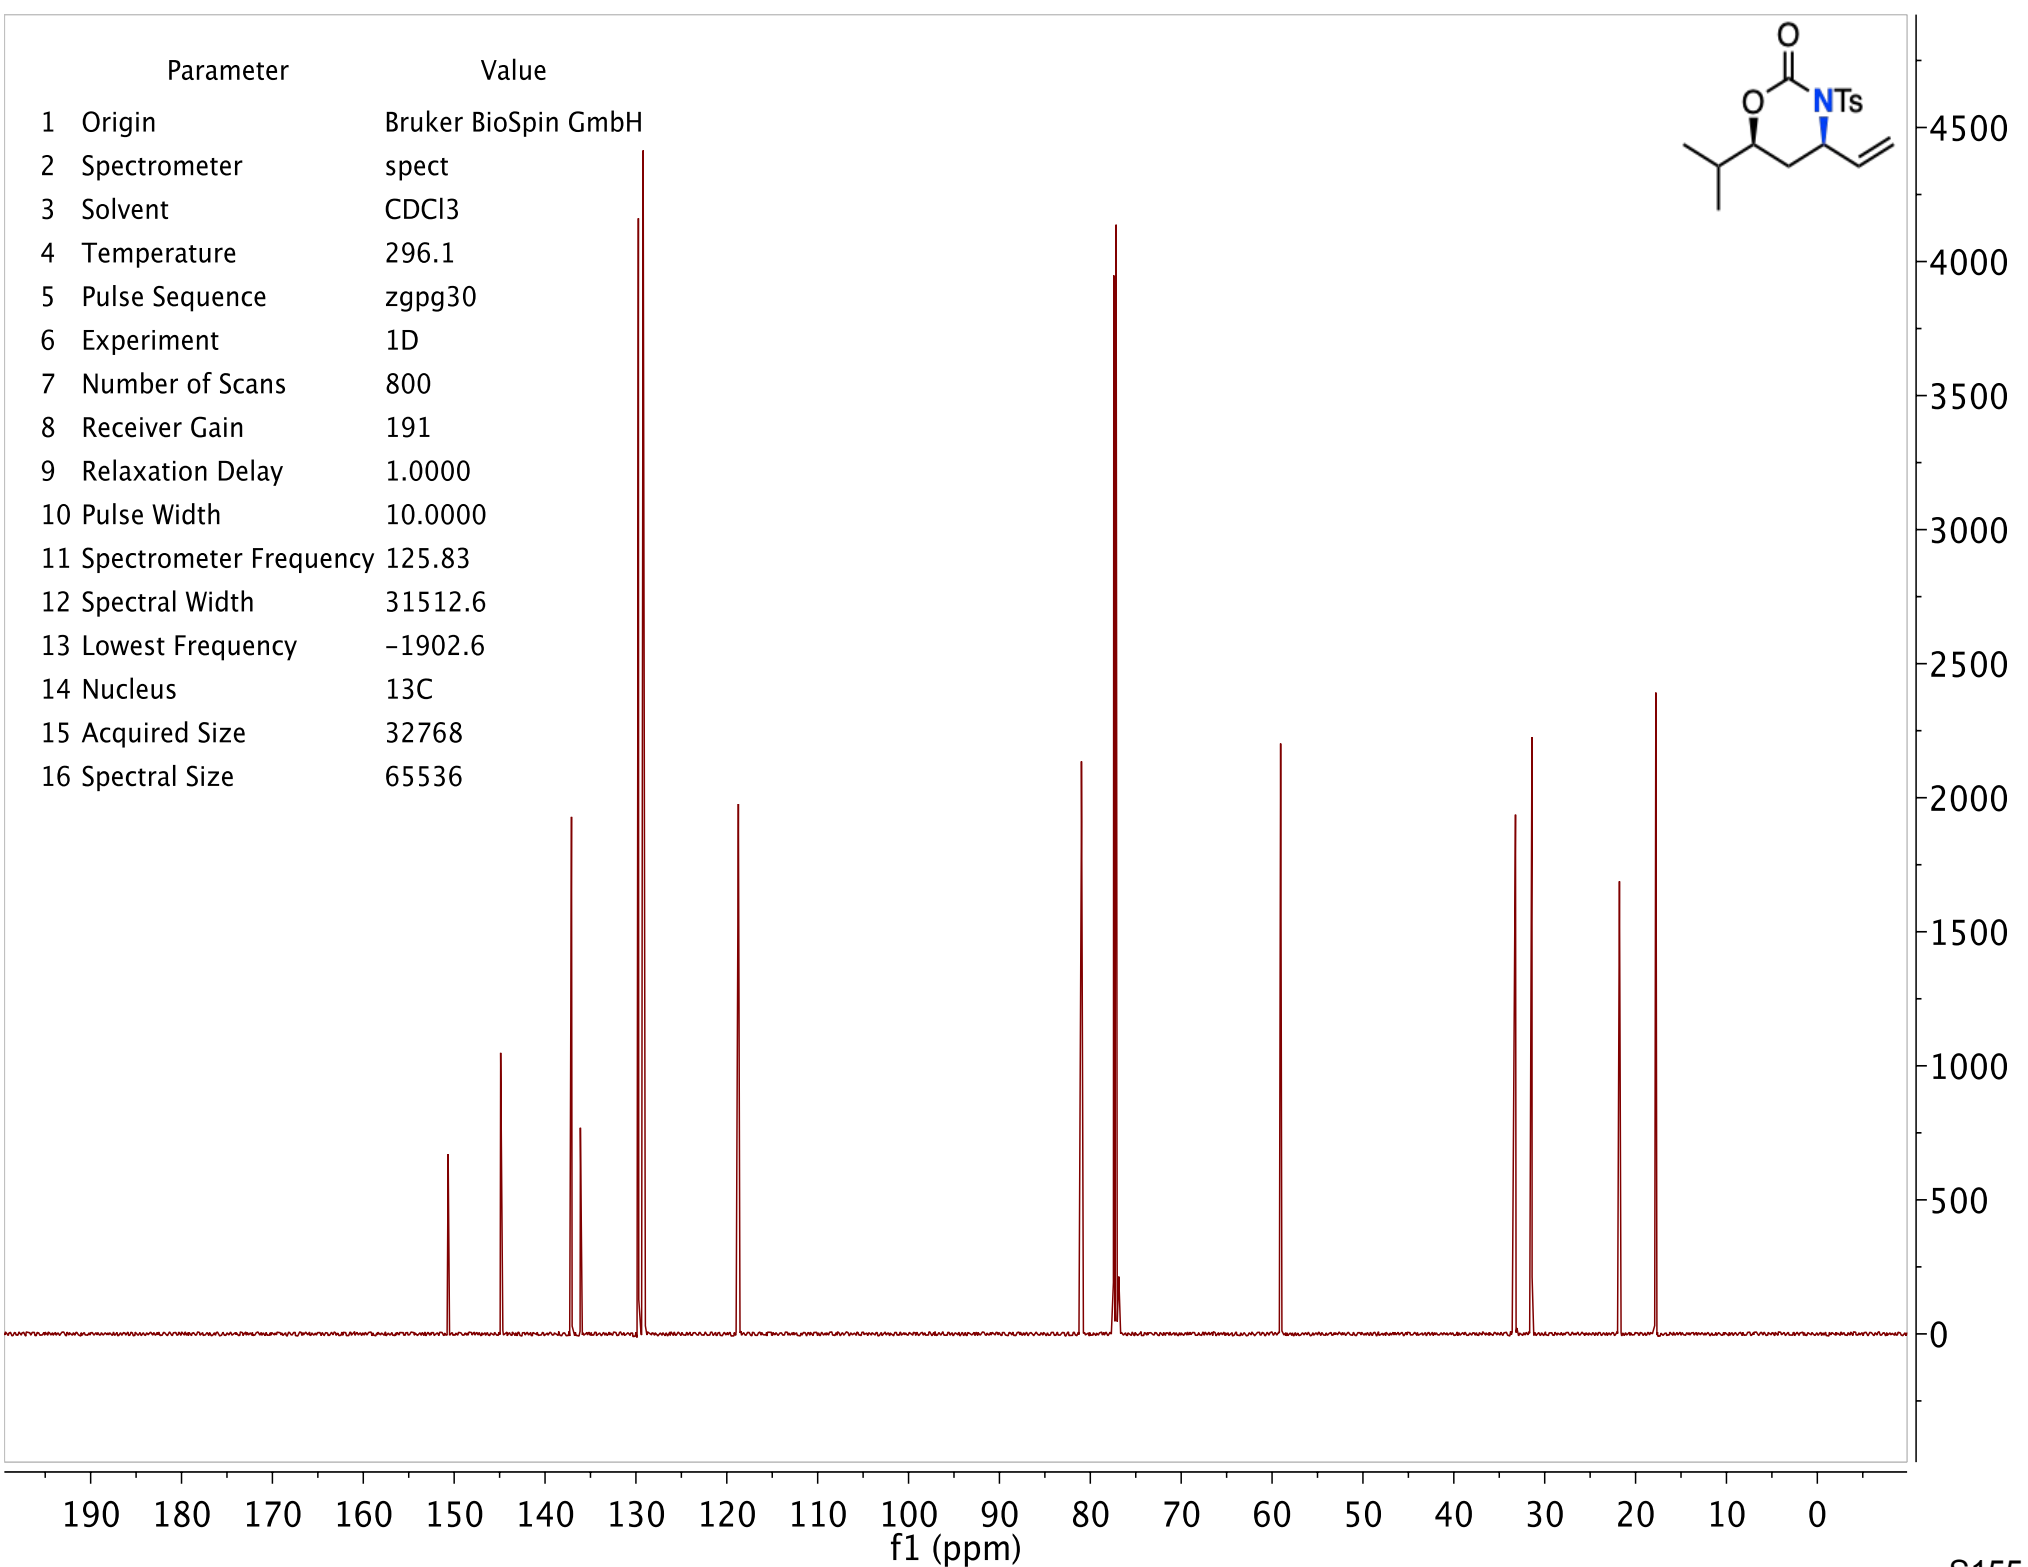

| Parameter                 | Value               |
|---------------------------|---------------------|
| 1 Origin                  | Bruker BioSpin GmbH |
| 2 Instrument              | spect               |
| 3 Solvent                 | CDCl3               |
| 4 Temperature             | 298.1               |
| 5 Pulse Sequence          | zg30                |
| 6 Experiment              | 1D                  |
| 7 Number of Scans         | 16                  |
| 8 Receiver Gain           | 94.3                |
| 9 Relaxation Delay        | 15.0000             |
| 10 Pulse Width            | 12.0000             |
| 11 Spectrometer Frequency | 500.35              |
| 12 Spectral Width         | 10000.0             |
| 13 Lowest Frequency       | -1922.3             |
| 14 Nucleus                | 1H                  |
| 15 Acquired Size          | 32768               |
| 16 Spectral Size          | 65536               |

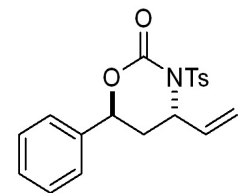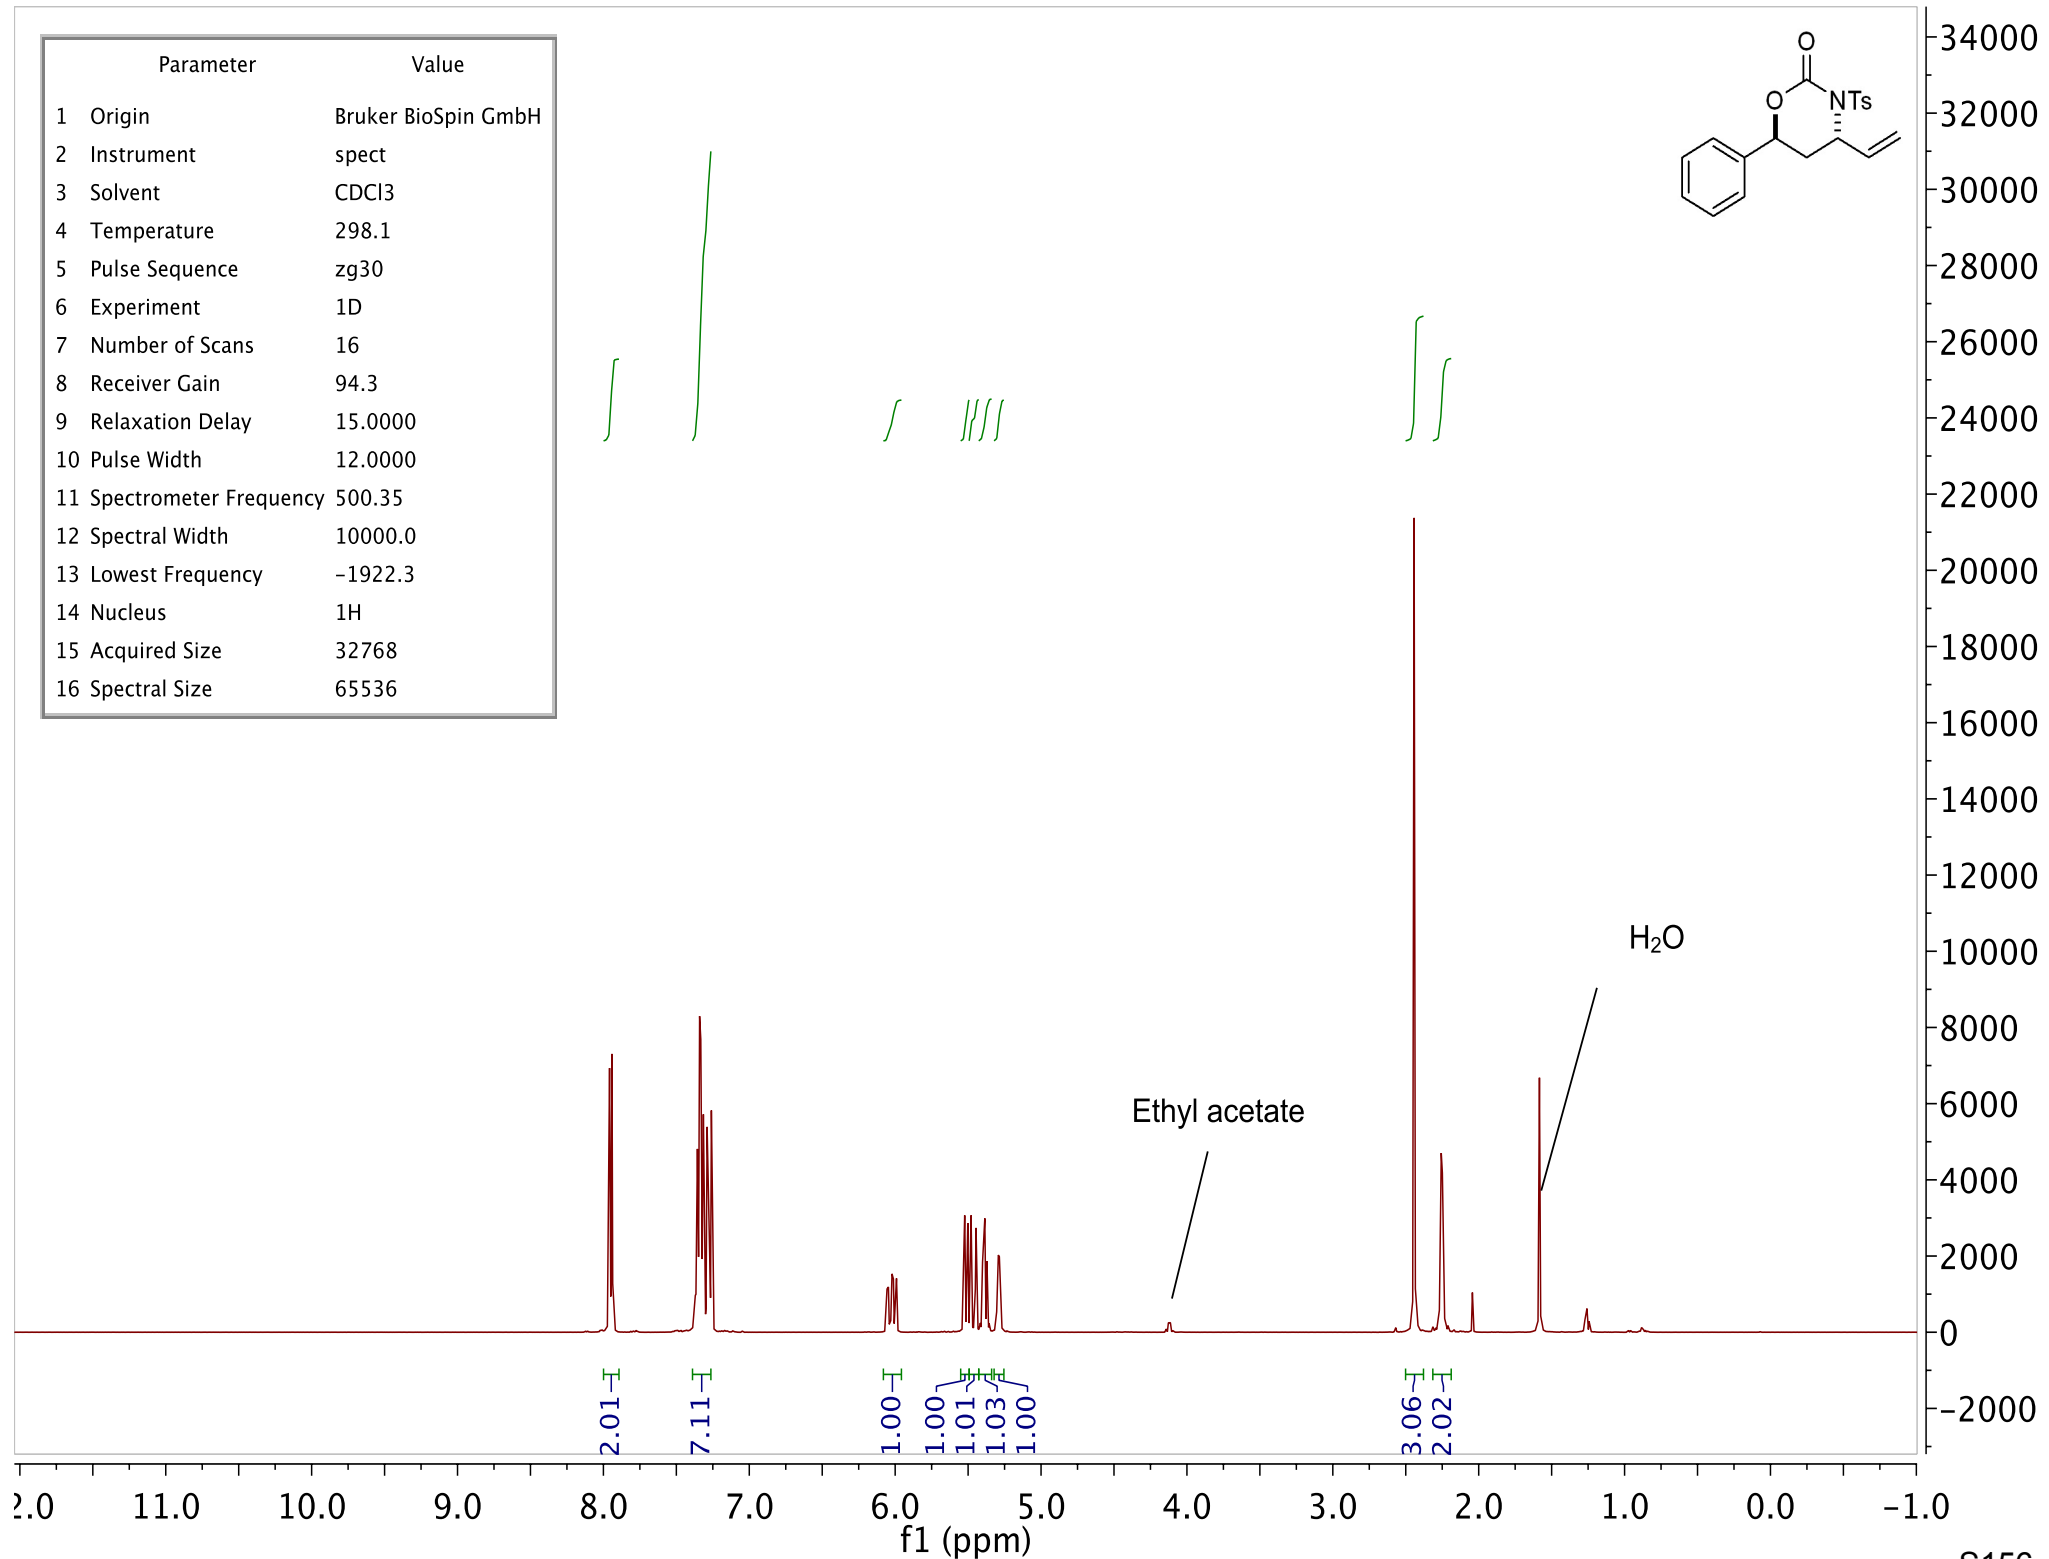

| Parameter                 | Value               |
|---------------------------|---------------------|
| 1 Origin                  | Bruker BioSpin GmbH |
| 2 Instrument              | spect               |
| 3 Solvent                 | CDCl3               |
| 4 Temperature             | 298.2               |
| 5 Pulse Sequence          | zgpg30              |
| 6 Experiment              | 1D                  |
| 7 Number of Scans         | 2058                |
| 8 Receiver Gain           | 190.5               |
| 9 Relaxation Delay        | 2.0000              |
| 10 Pulse Width            | 10.0000             |
| 11 Spectrometer Frequency | 125.83              |
| 12 Spectral Width         | 31512.6             |
| 13 Lowest Frequency       | -1901.0             |
| 14 Nucleus                | 13C                 |
| 15 Acquired Size          | 32768               |
| 16 Spectral Size          | 65536               |

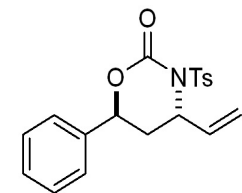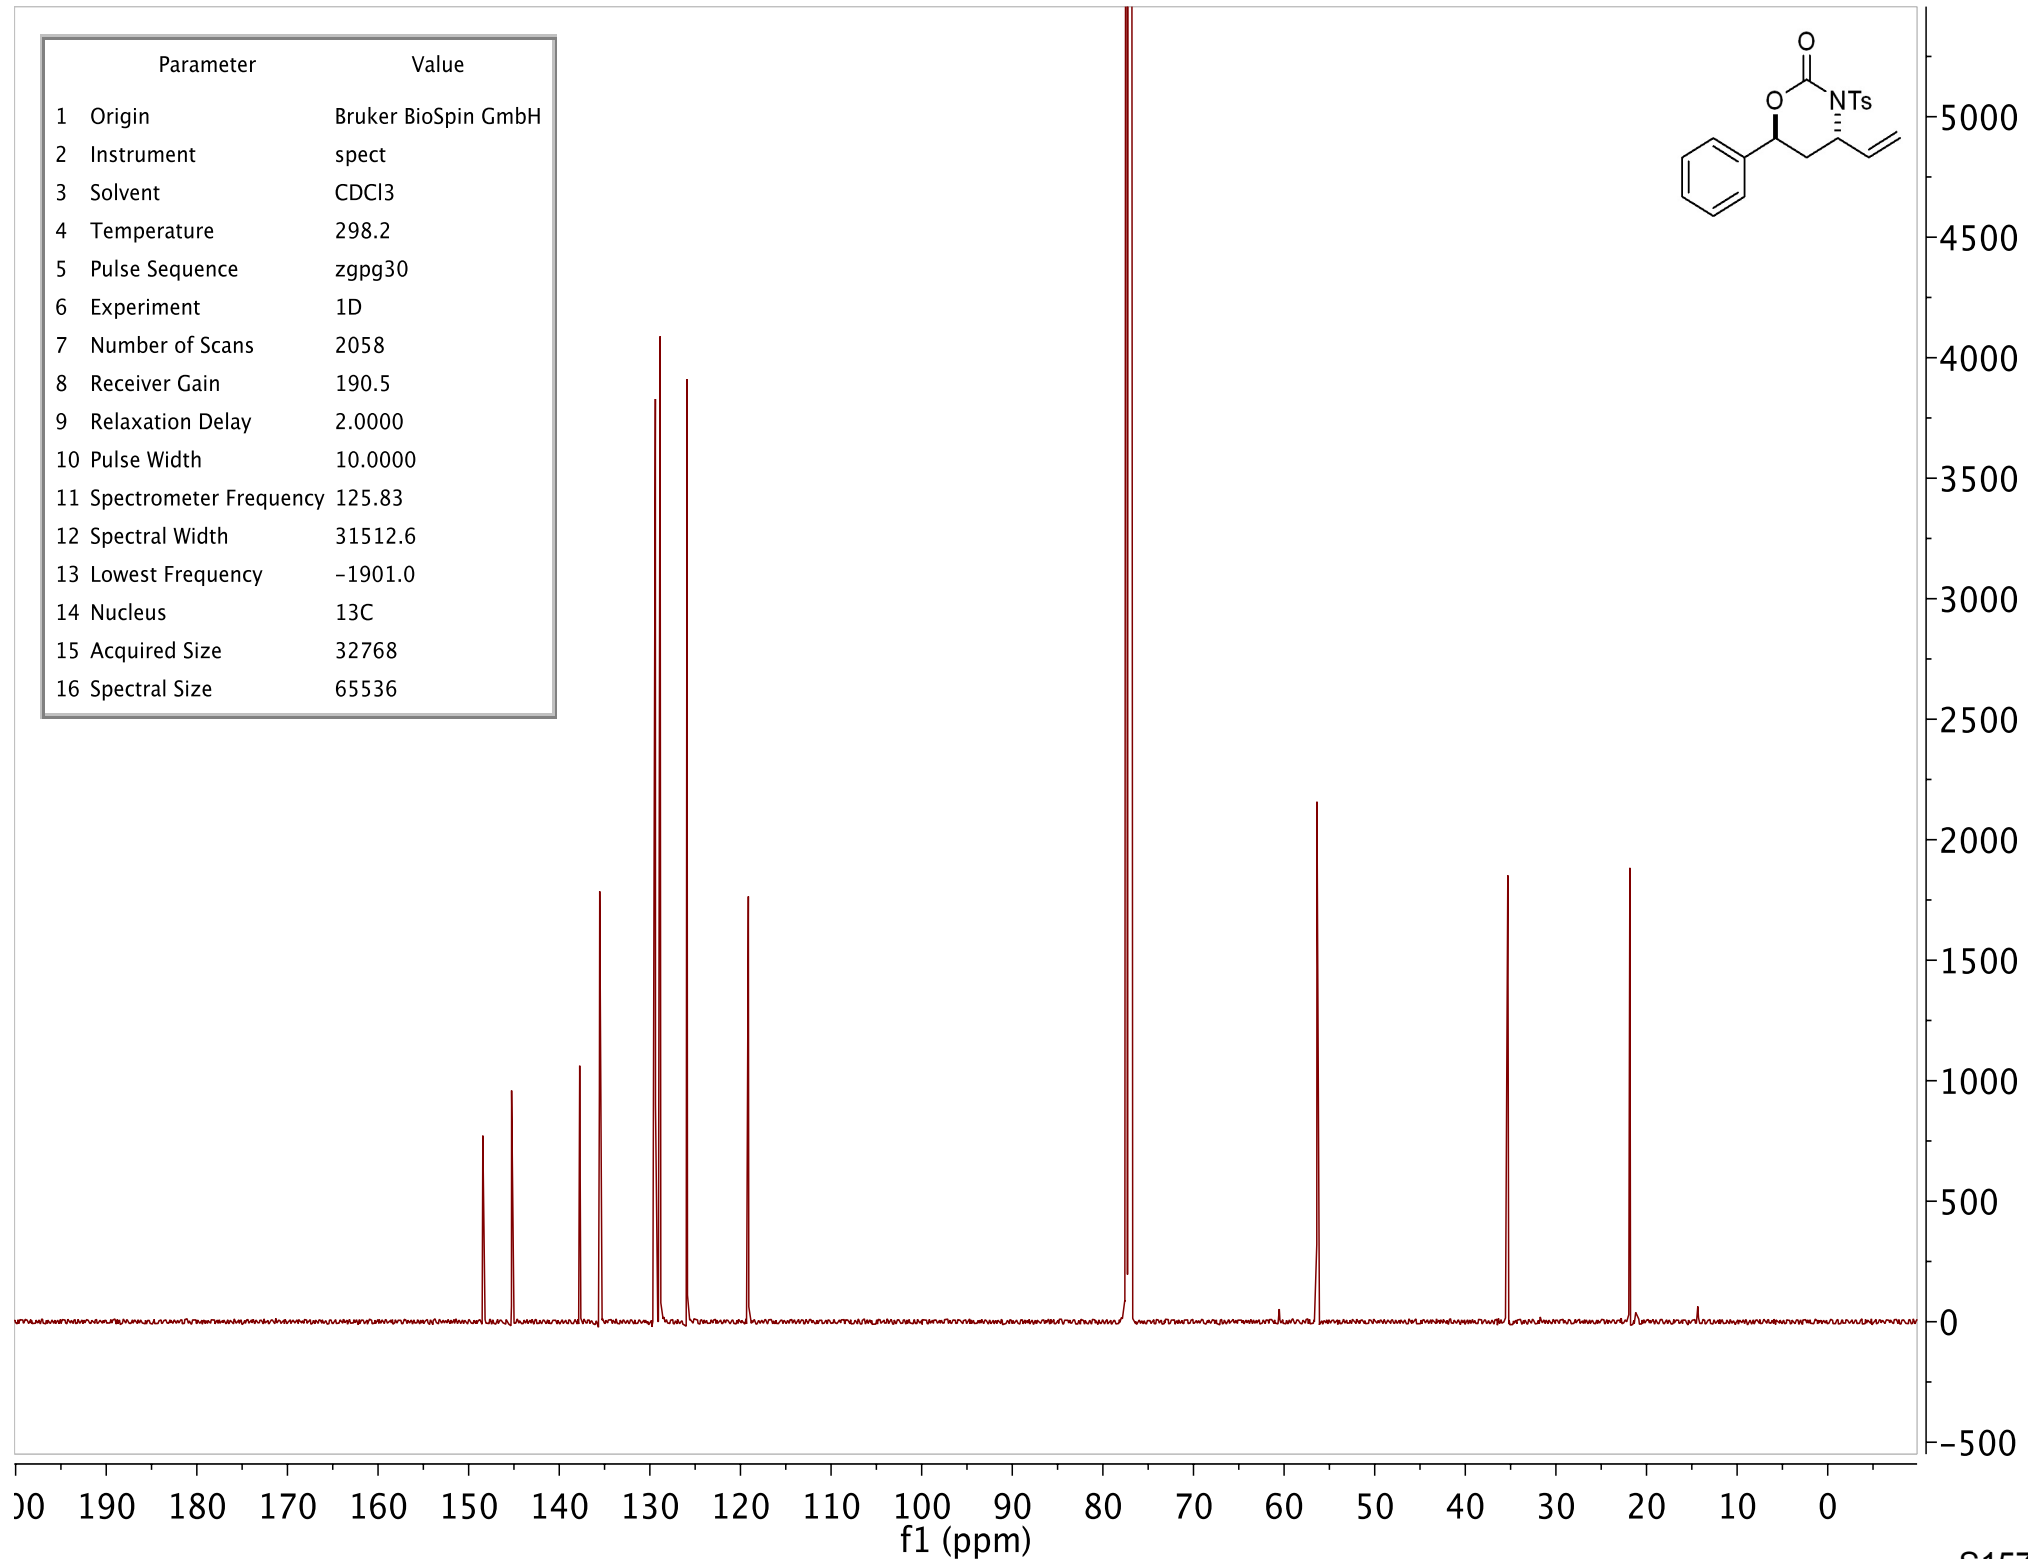

| Parameter                 | Value               |
|---------------------------|---------------------|
| 1 Origin                  | Bruker BioSpin GmbH |
| 2 Instrument              | spect               |
| 3 Solvent                 | CDCl3               |
| 4 Temperature             | 298.1               |
| 5 Pulse Sequence          | zg30                |
| 6 Experiment              | 1D                  |
| 7 Number of Scans         | 16                  |
| 8 Receiver Gain           | 48.8                |
| 9 Relaxation Delay        | 15.0000             |
| 10 Pulse Width            | 12.0000             |
| 11 Spectrometer Frequency | 500.35              |
| 12 Spectral Width         | 10000.0             |
| 13 Lowest Frequency       | -1921.3             |
| 14 Nucleus                | 1H                  |
| 15 Acquired Size          | 32768               |
| 16 Spectral Size          | 65536               |

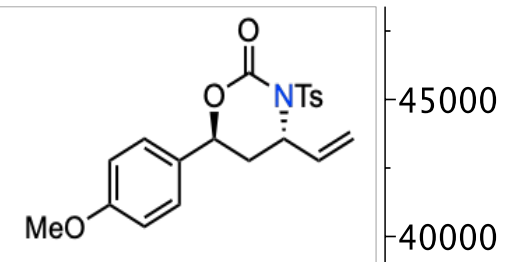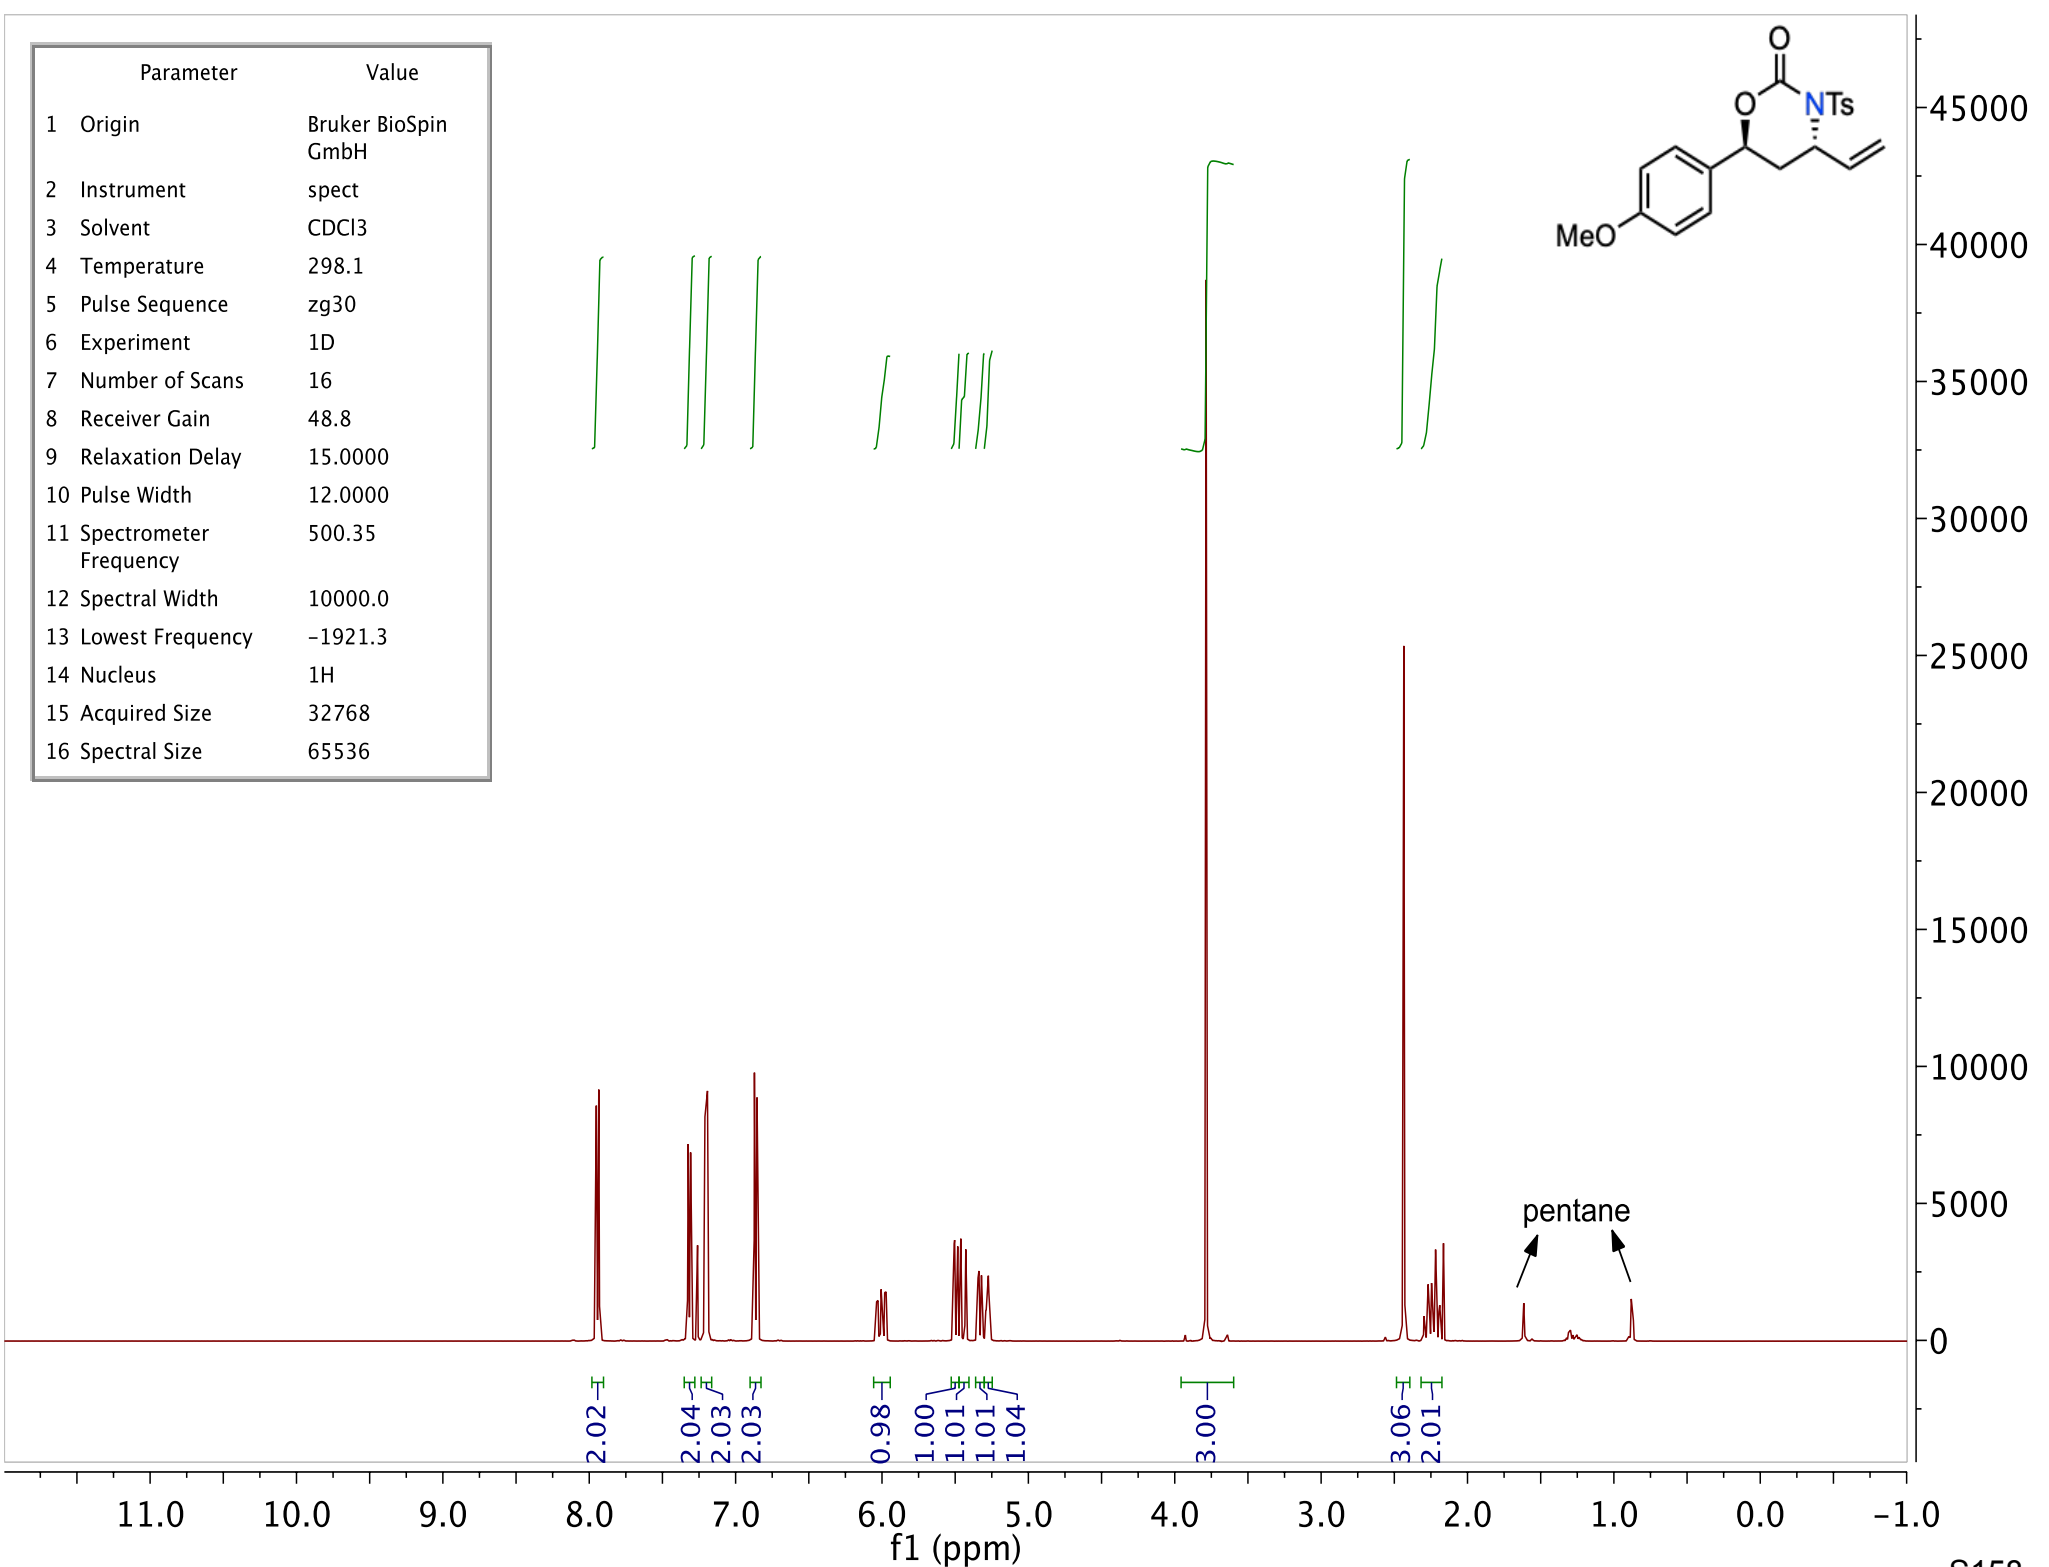

pentane



| Parameter                 | Value               |
|---------------------------|---------------------|
| 1 Origin                  | Bruker BioSpin GmbH |
| 2 Instrument              | spect               |
| 3 Solvent                 | CDCl3               |
| 4 Temperature             | 298.1               |
| 5 Pulse Sequence          | zgpg30              |
| 6 Experiment              | 1D                  |
| 7 Number of Scans         | 256                 |
| 8 Receiver Gain           | 190.5               |
| 9 Relaxation Delay        | 2.0000              |
| 10 Pulse Width            | 10.0000             |
| 11 Spectrometer Frequency | 125.83              |
| 12 Spectral Width         | 31512.6             |
| 13 Lowest Frequency       | -1903.4             |
| 14 Nucleus                | 13C                 |
| 15 Acquired Size          | 32768               |
| 16 Spectral Size          | 65536               |

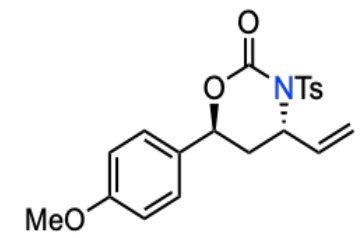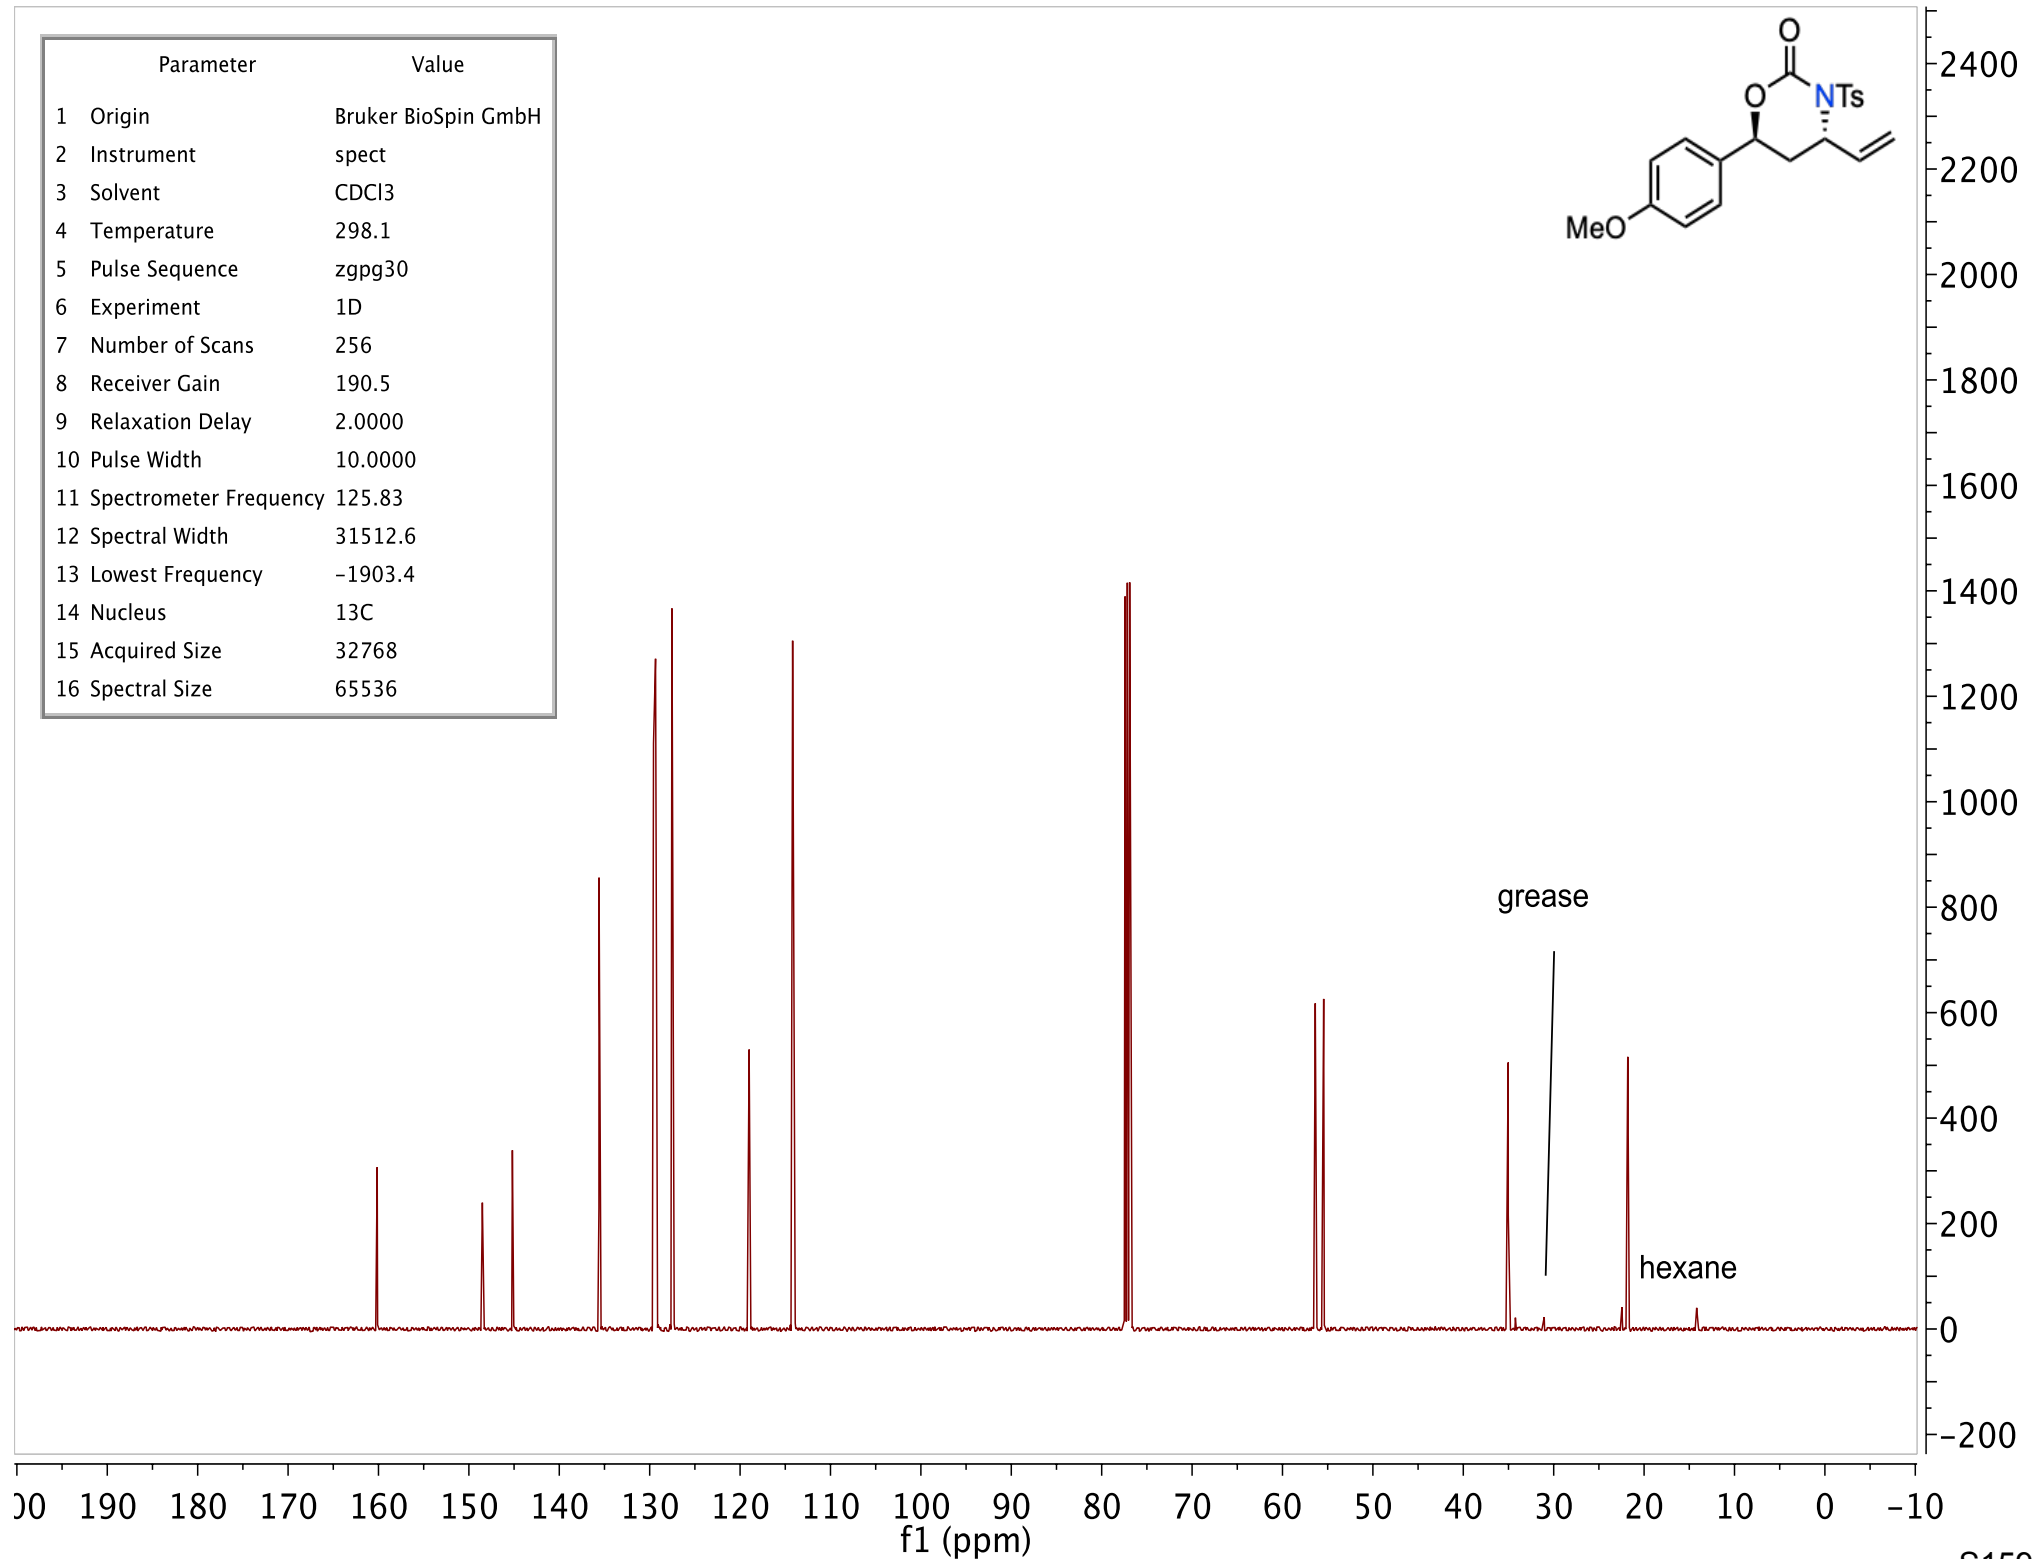

| Parameter                 | Value               |
|---------------------------|---------------------|
| 1 Origin                  | Bruker BioSpin GmbH |
| 2 Instrument              | spect               |
| 3 Solvent                 | CDCl3               |
| 4 Temperature             | 298.2               |
| 5 Pulse Sequence          | zg30                |
| 6 Experiment              | 1D                  |
| 7 Number of Scans         | 16                  |
| 8 Receiver Gain           | 168.2               |
| 9 Relaxation Delay        | 15.0000             |
| 10 Pulse Width            | 12.0000             |
| 11 Spectrometer Frequency | 500.35              |
| 12 Spectral Width         | 10000.0             |
| 13 Lowest Frequency       | -1921.3             |
| 14 Nucleus                | 1H                  |
| 15 Acquired Size          | 32768               |
| 16 Spectral Size          | 65536               |

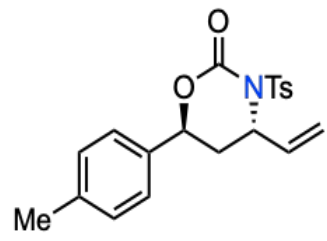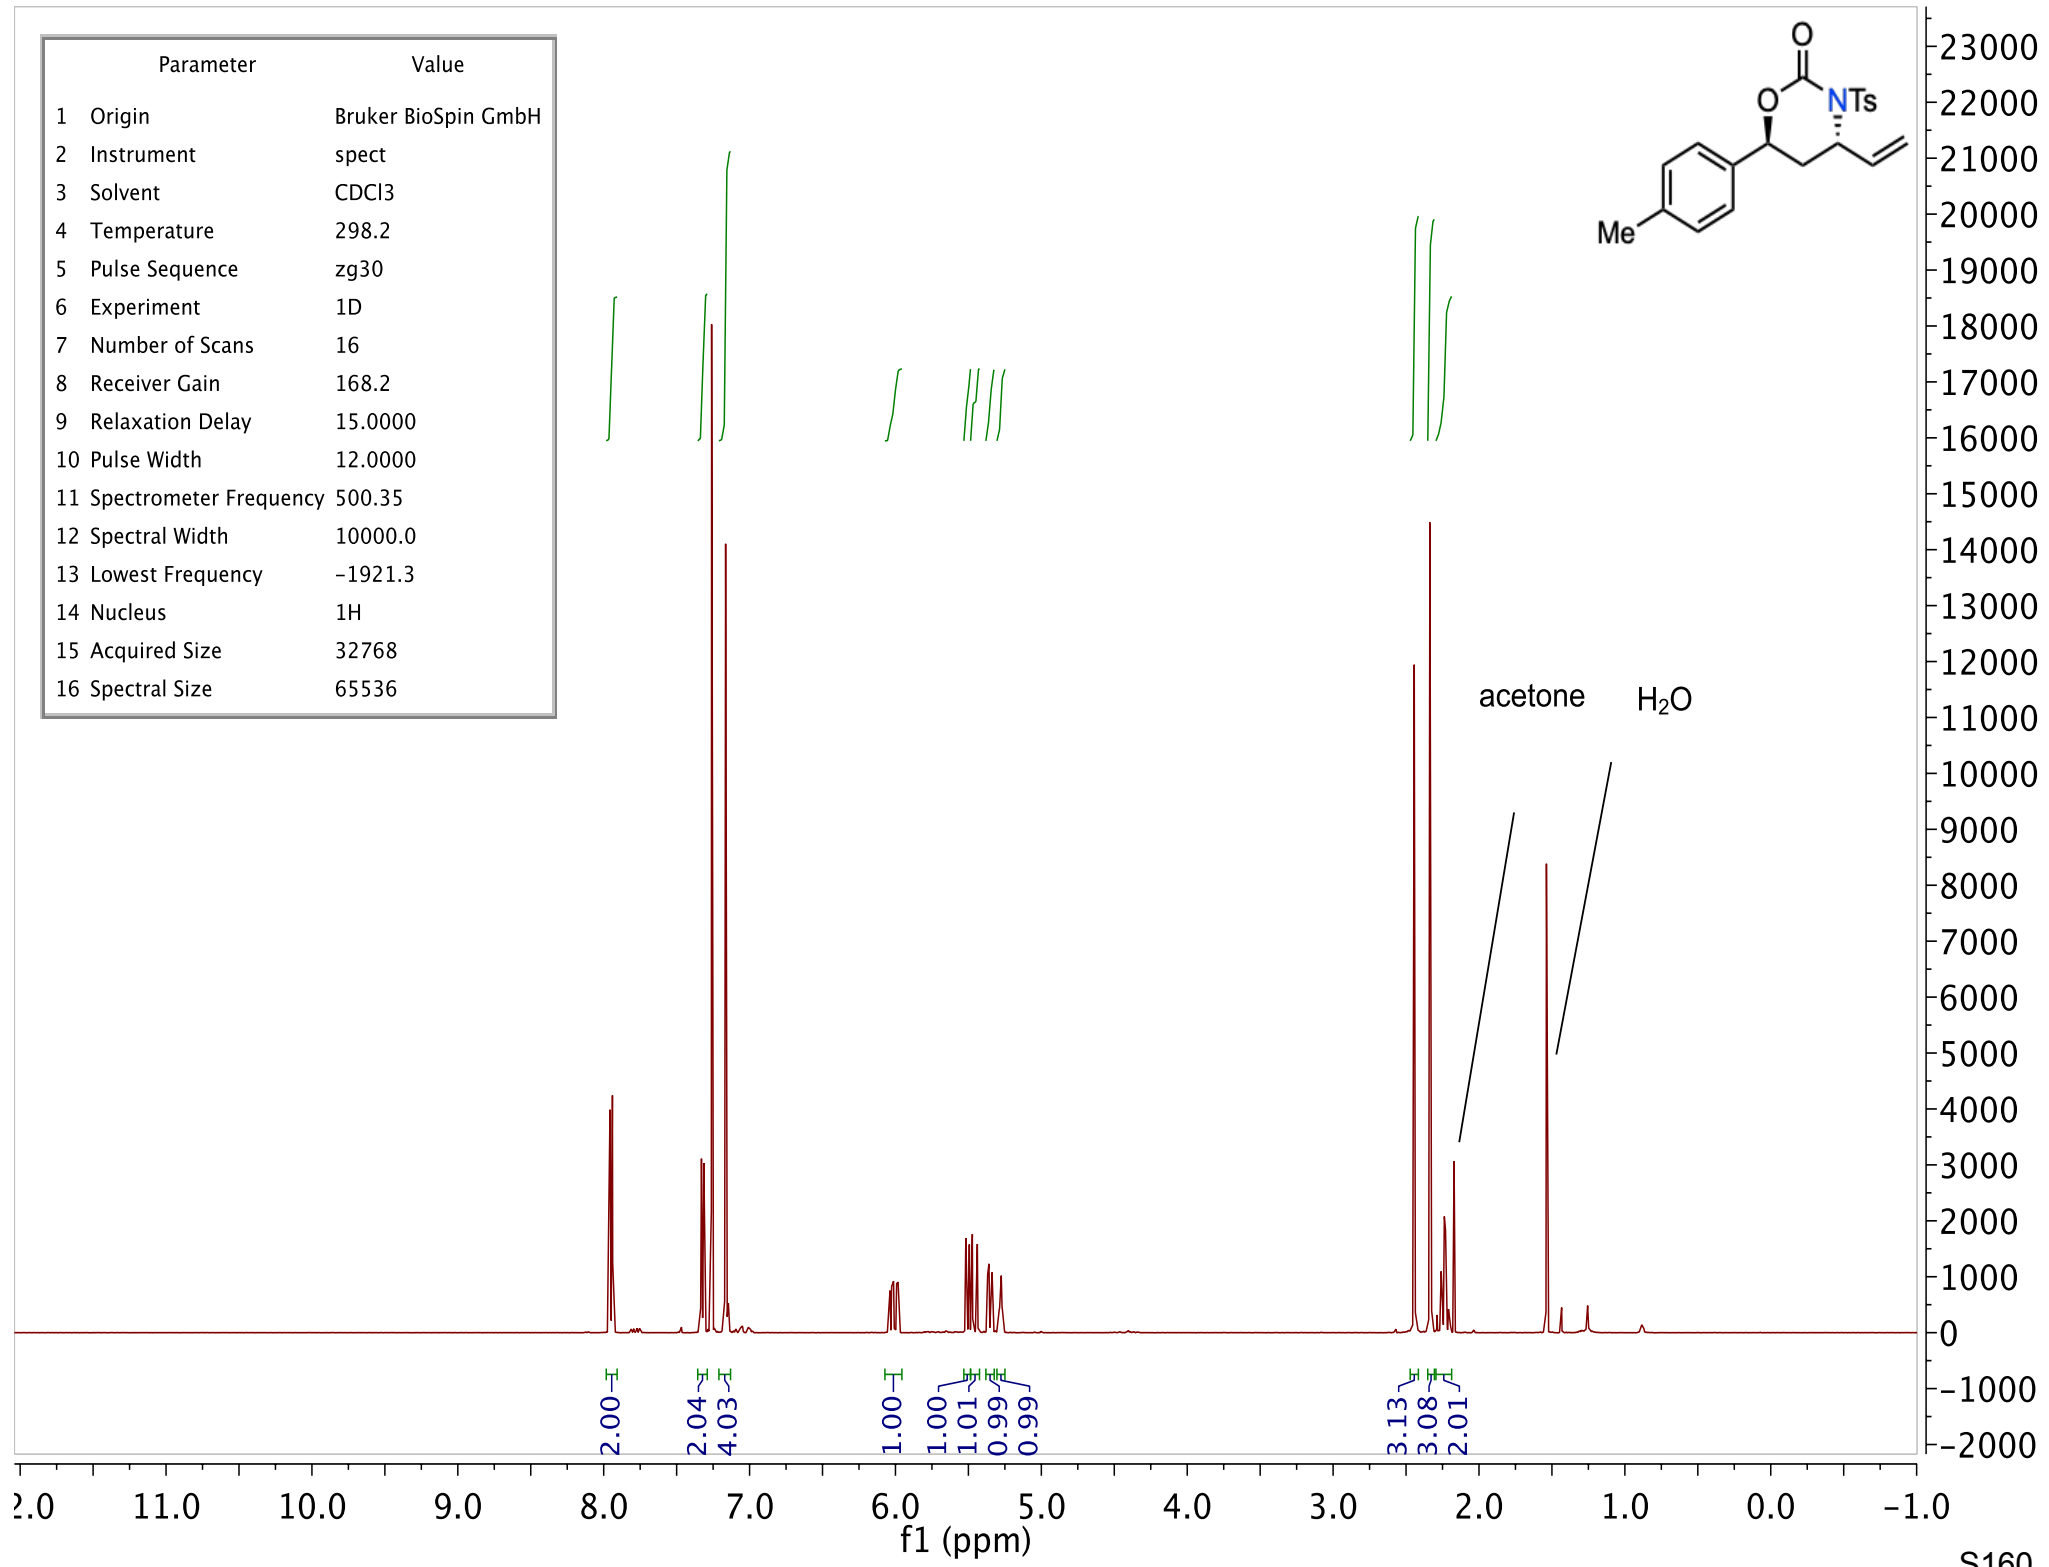

| Parameter                 | Value               |
|---------------------------|---------------------|
| 1 Origin                  | Bruker BioSpin GmbH |
| 2 Instrument              | spect               |
| 3 Solvent                 | CDCl3               |
| 4 Temperature             | 298.2               |
| 5 Pulse Sequence          | zgpg30              |
| 6 Experiment              | 1D                  |
| 7 Number of Scans         | 2056                |
| 8 Receiver Gain           | 190.5               |
| 9 Relaxation Delay        | 2.0000              |
| 10 Pulse Width            | 10.0000             |
| 11 Spectrometer Frequency | 125.83              |
| 12 Spectral Width         | 31512.6             |
| 13 Lowest Frequency       | -1897.7             |
| 14 Nucleus                | 13C                 |
| 15 Acquired Size          | 32768               |
| 16 Spectral Size          | 65536               |

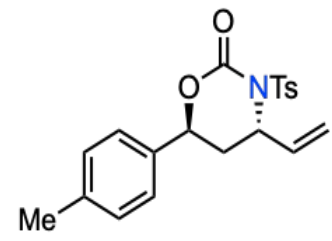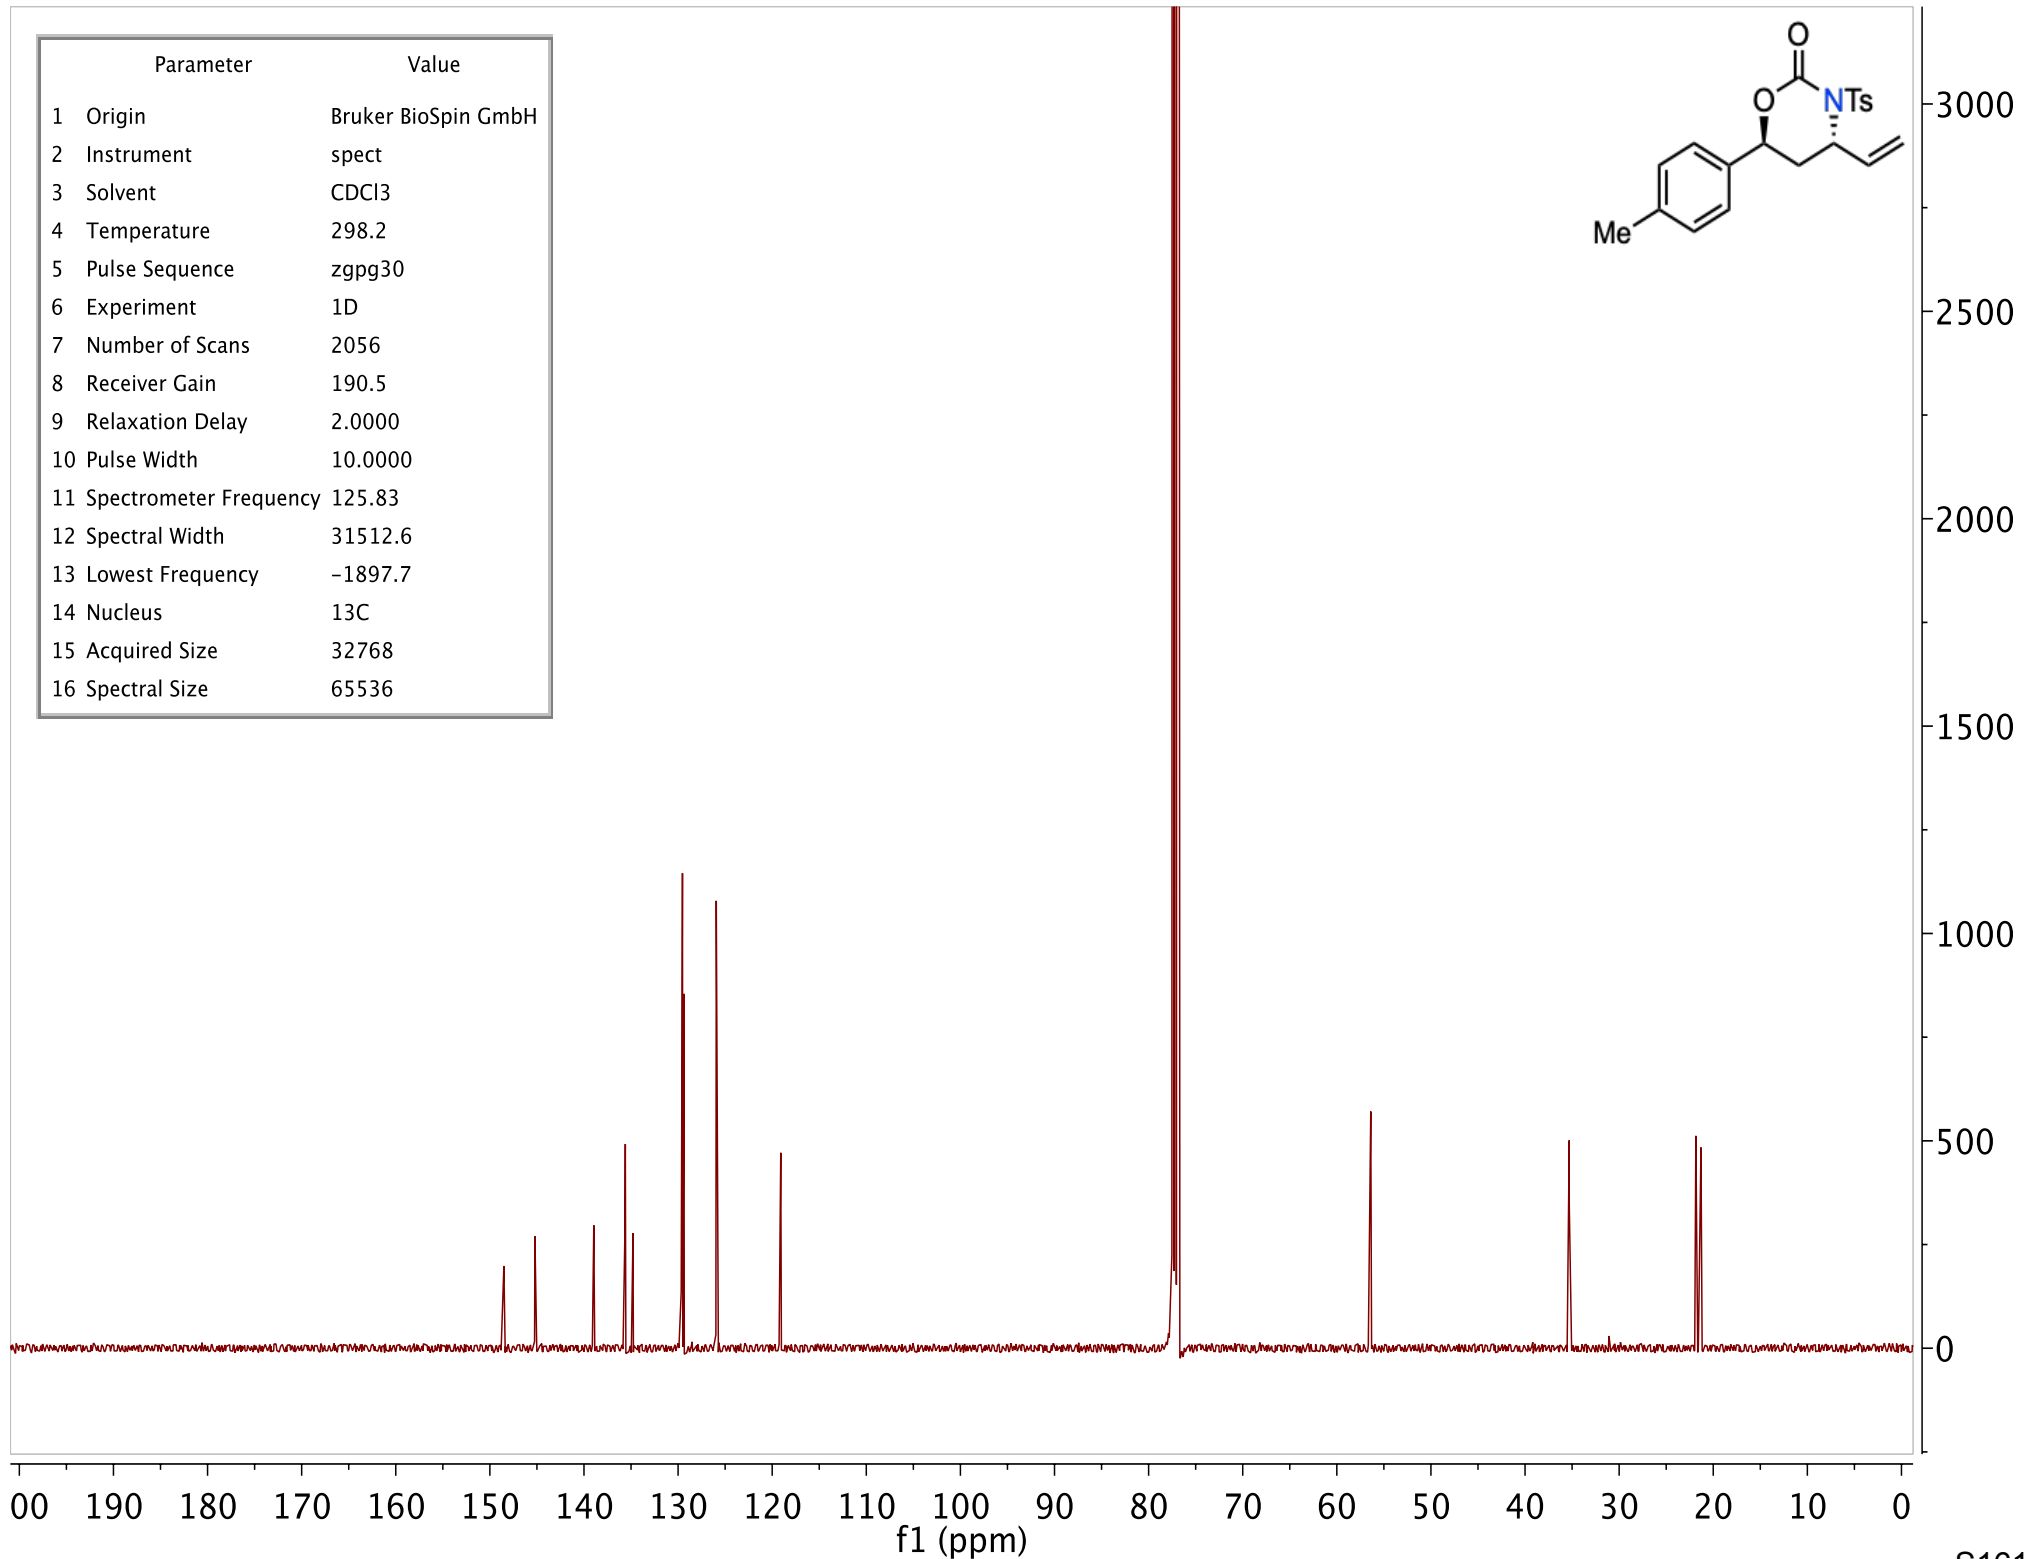

| Parameter                 | Value               |
|---------------------------|---------------------|
| 1 Origin                  | Bruker BioSpin GmbH |
| 2 Instrument              | spect               |
| 3 Solvent                 | CDCl3               |
| 4 Temperature             | 298.0               |
| 5 Pulse Sequence          | zg30                |
| 6 Experiment              | 1D                  |
| 7 Number of Scans         | 16                  |
| 8 Receiver Gain           | 190.5               |
| 9 Relaxation Delay        | 15.0000             |
| 10 Pulse Width            | 12.0000             |
| 11 Spectrometer Frequency | 500.35              |
| 12 Spectral Width         | 10000.0             |
| 13 Lowest Frequency       | -1922.8             |
| 14 Nucleus                | 1H                  |
| 15 Acquired Size          | 32768               |
| 16 Spectral Size          | 65536               |

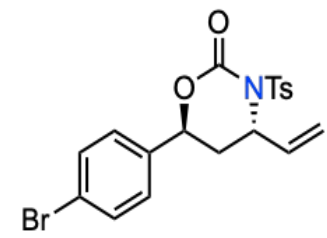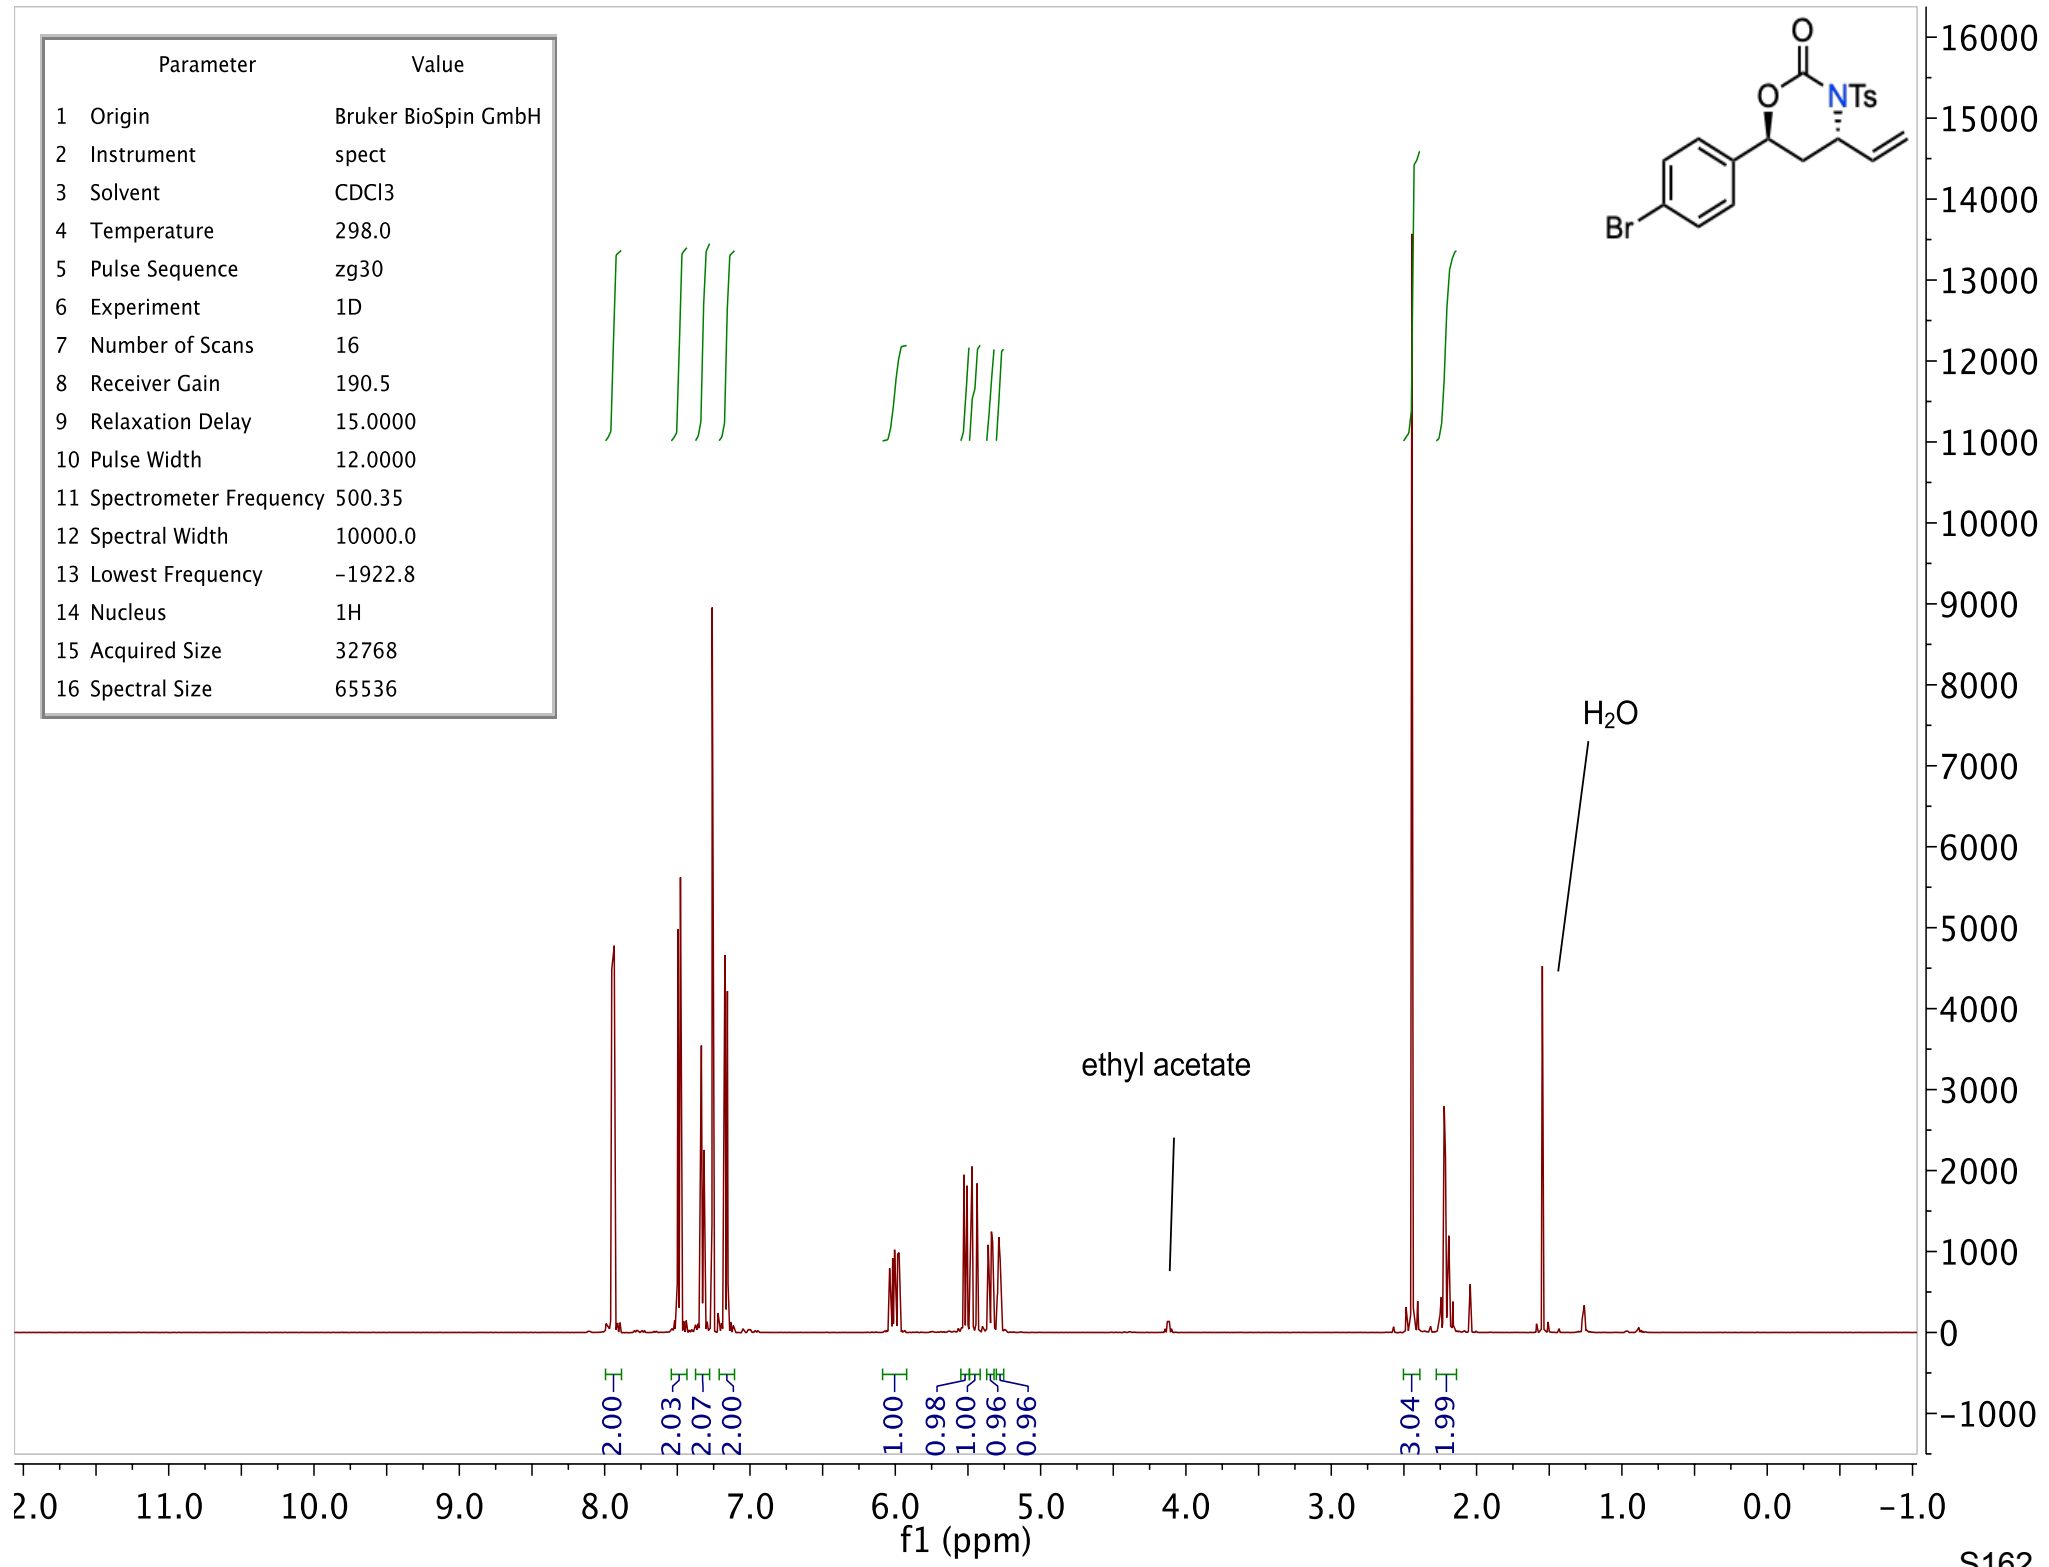

| Parameter                 | Value               |
|---------------------------|---------------------|
| 1 Origin                  | Bruker BioSpin GmbH |
| 2 Instrument              | spect               |
| 3 Solvent                 | CDCl3               |
| 4 Temperature             | 298.0               |
| 5 Pulse Sequence          | zgpg30              |
| 6 Experiment              | 1D                  |
| 7 Number of Scans         | 1024                |
| 8 Receiver Gain           | 190.5               |
| 9 Relaxation Delay        | 2.0000              |
| 10 Pulse Width            | 10.0000             |
| 11 Spectrometer Frequency | 125.83              |
| 12 Spectral Width         | 31512.6             |
| 13 Lowest Frequency       | -1899.4             |
| 14 Nucleus                | 13C                 |
| 15 Acquired Size          | 32768               |
| 16 Spectral Size          | 65536               |

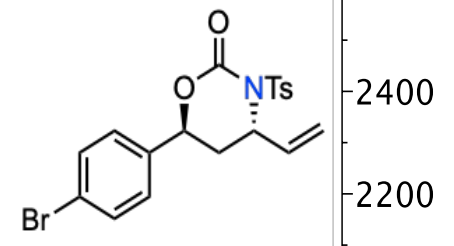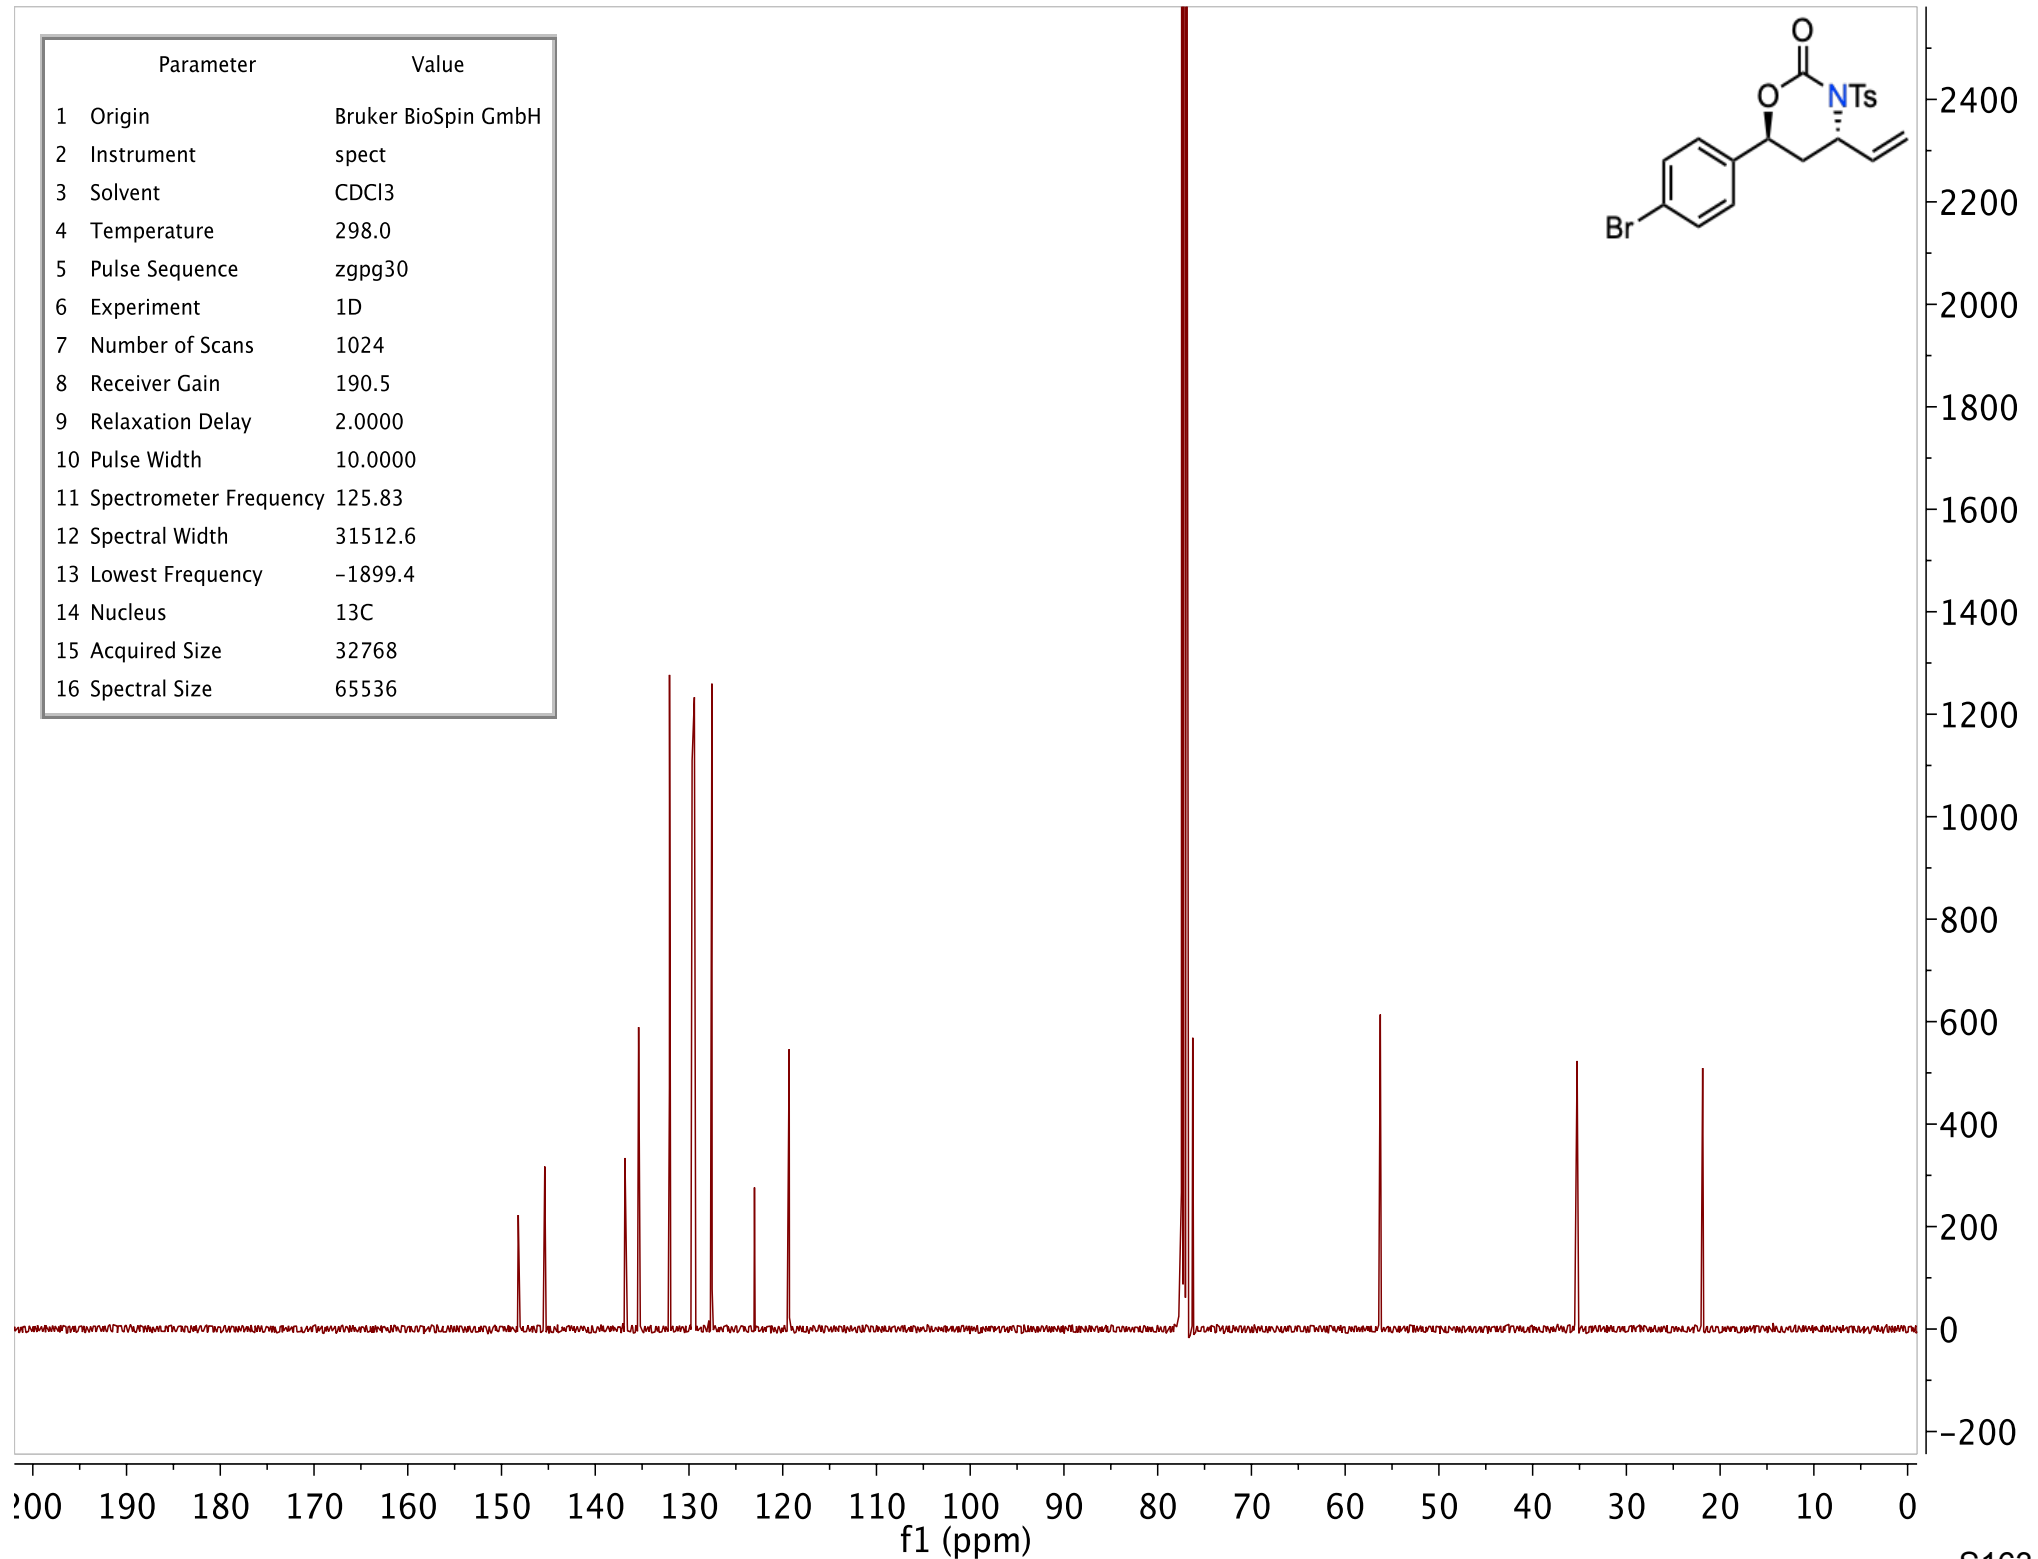

| Parameter                 | Value               |
|---------------------------|---------------------|
| 1 Origin                  | Bruker BioSpin GmbH |
| 2 Instrument              | spect               |
| 3 Solvent                 | CDCl3               |
| 4 Temperature             | 289.0               |
| 5 Pulse Sequence          | zg30                |
| 6 Experiment              | 1D                  |
| 7 Number of Scans         | 16                  |
| 8 Receiver Gain           | 94.3                |
| 9 Relaxation Delay        | 15.0000             |
| 10 Pulse Width            | 12.0000             |
| 11 Spectrometer Frequency | 500.35              |
| 12 Spectral Width         | 10000.0             |
| 13 Lowest Frequency       | -1921.3             |
| 14 Nucleus                | 1H                  |
| 15 Acquired Size          | 32768               |
| 16 Spectral Size          | 65536               |

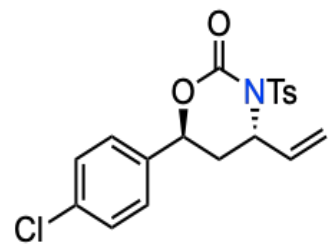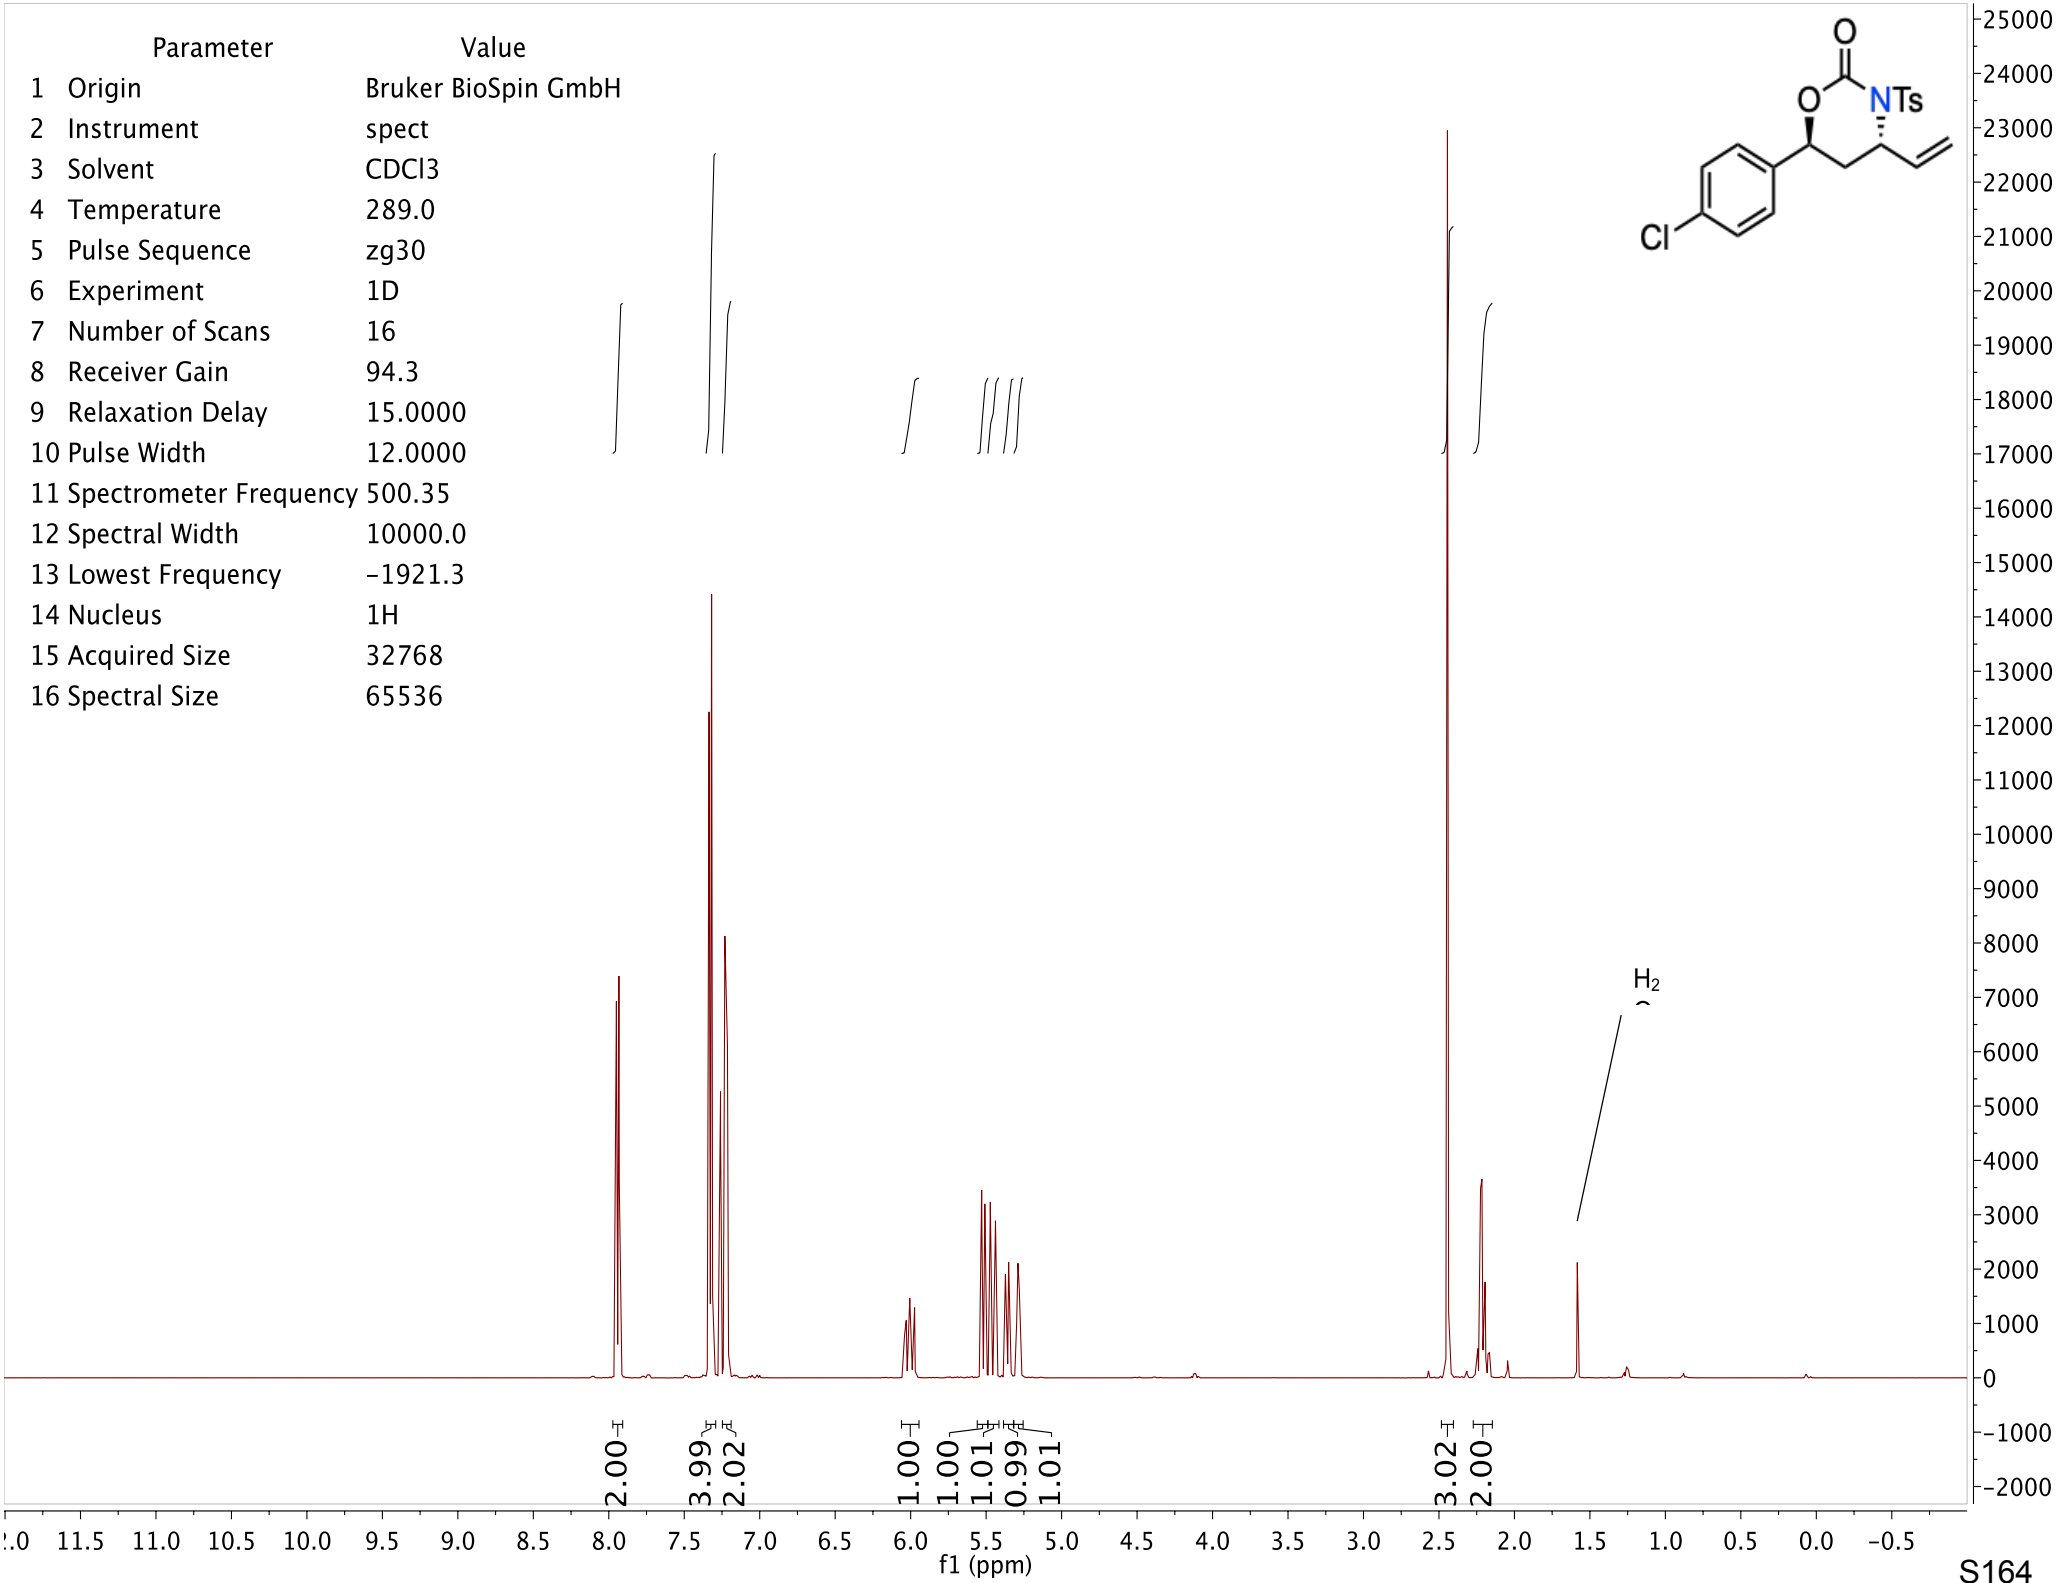

| Parameter                 | Value               |
|---------------------------|---------------------|
| 1 Origin                  | Bruker BioSpin GmbH |
| 2 Instrument              | spect               |
| 3 Solvent                 | CDCl3               |
| 4 Temperature             | 288.8               |
| 5 Pulse Sequence          | zgpg30              |
| 6 Experiment              | 1D                  |
| 7 Number of Scans         | 256                 |
| 8 Receiver Gain           | 190.5               |
| 9 Relaxation Delay        | 2.0000              |
| 10 Pulse Width            | 10.0000             |
| 11 Spectrometer Frequency | 125.83              |
| 12 Spectral Width         | 31512.6             |
| 13 Lowest Frequency       | -1903.5             |
| 14 Nucleus                | 13C                 |
| 15 Acquired Size          | 32768               |
| 16 Spectral Size          | 65536               |

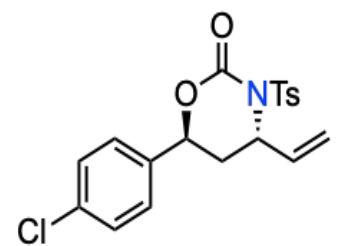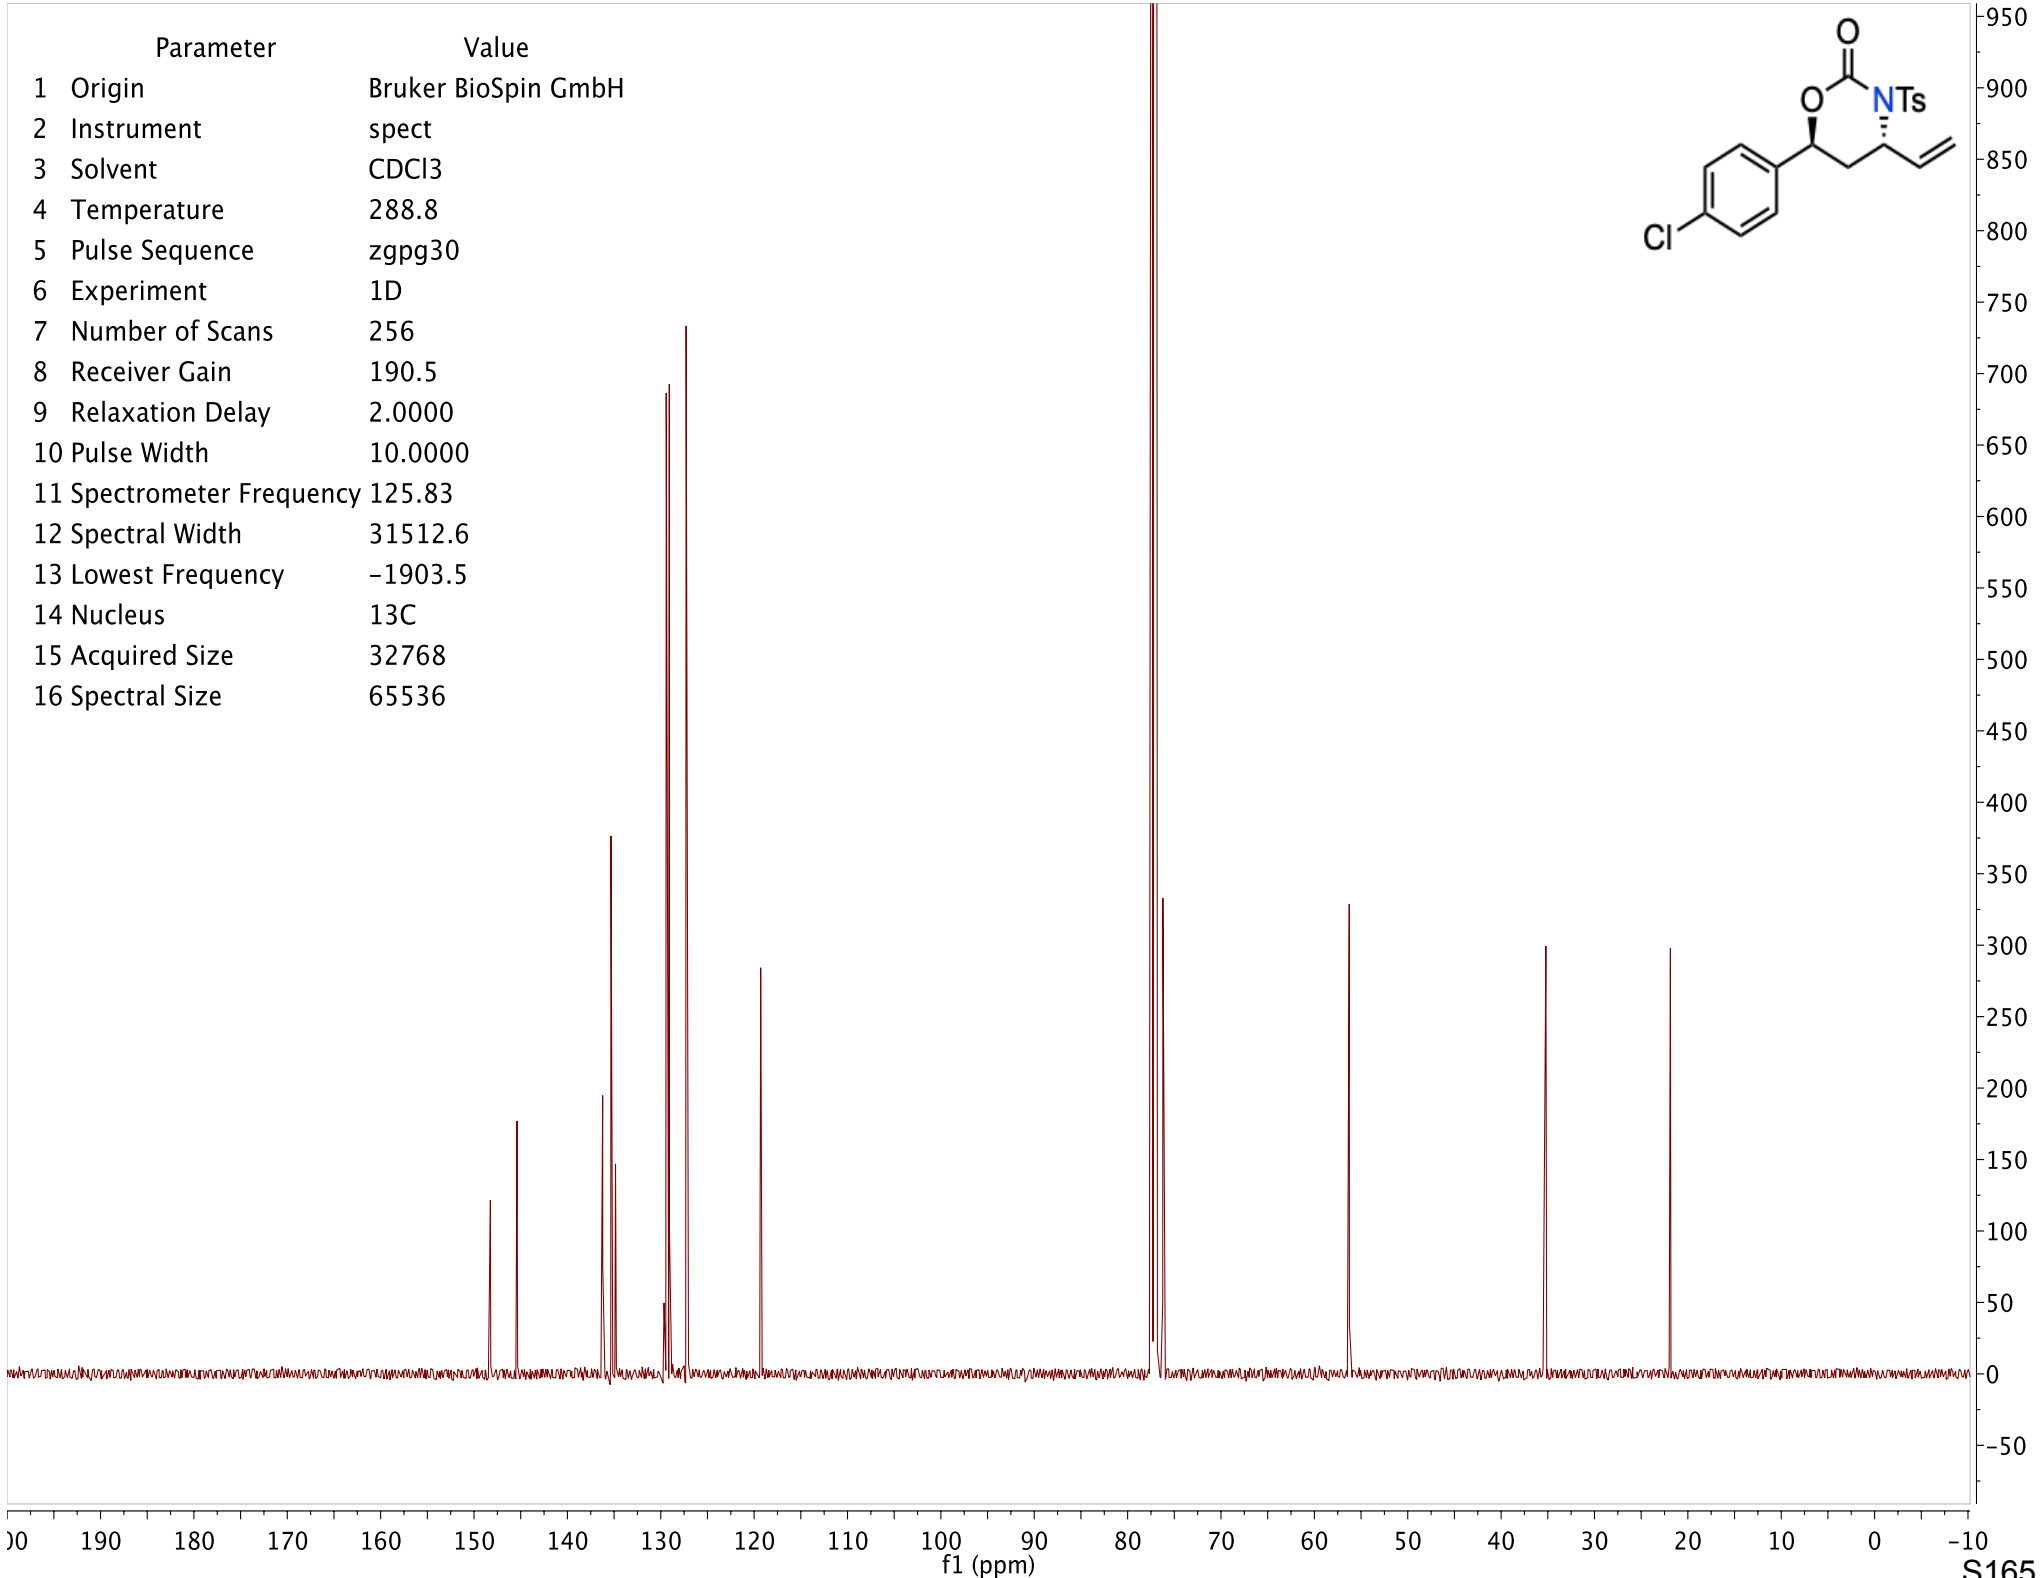

| Parameter                 | Value               |
|---------------------------|---------------------|
| 1 Origin                  | Bruker BioSpin GmbH |
| 2 Instrument              | spect               |
| 3 Solvent                 | CDCl3               |
| 4 Temperature             | 298.1               |
| 5 Pulse Sequence          | zg30                |
| 6 Experiment              | 1D                  |
| 7 Number of Scans         | 16                  |
| 8 Receiver Gain           | 94.3                |
| 9 Relaxation Delay        | 15.0000             |
| 10 Pulse Width            | 12.0000             |
| 11 Spectrometer Frequency | 500.35              |
| 12 Spectral Width         | 10000.0             |
| 13 Lowest Frequency       | -1922.3             |
| 14 Nucleus                | 1H                  |
| 15 Acquired Size          | 32768               |
| 16 Spectral Size          | 65536               |

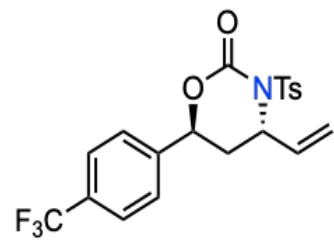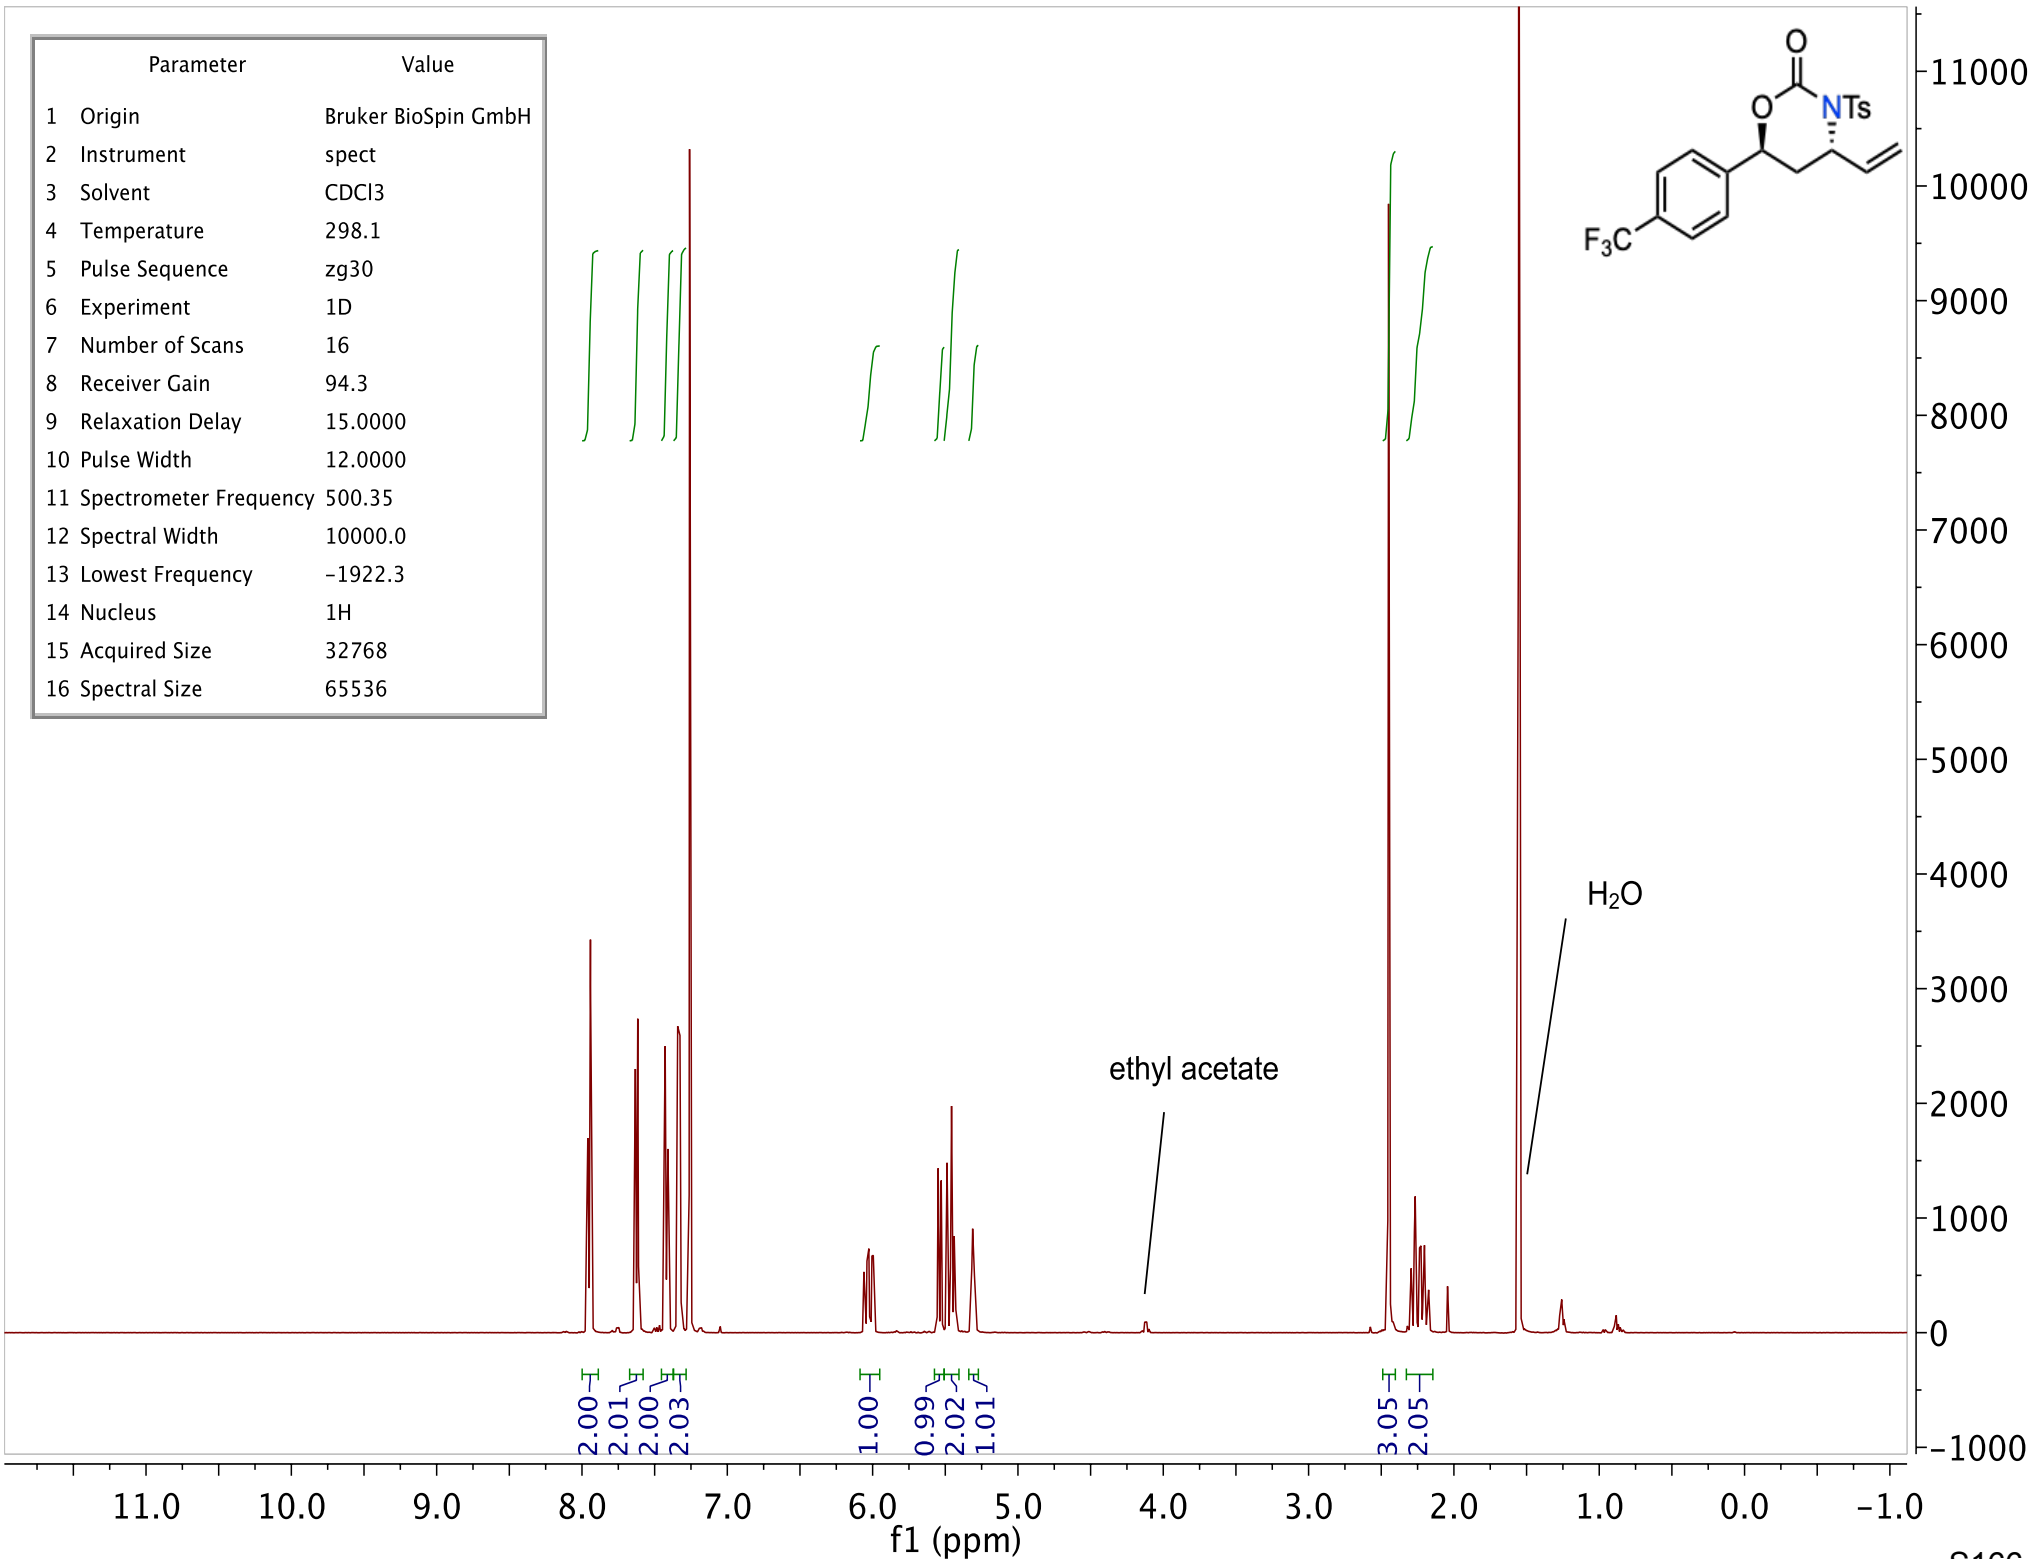



| Parameter                 | Value               |
|---------------------------|---------------------|
| 1 Origin                  | Bruker BioSpin GmbH |
| 2 Instrument              | spect               |
| 3 Solvent                 | CDCl3               |
| 4 Temperature             | 298.1               |
| 5 Pulse Sequence          | zgpg30              |
| 6 Experiment              | 1D                  |
| 7 Number of Scans         | 1024                |
| 8 Receiver Gain           | 190.5               |
| 9 Relaxation Delay        | 2.0000              |
| 10 Pulse Width            | 10.0000             |
| 11 Spectrometer Frequency | 125.83              |
| 12 Spectral Width         | 31512.6             |
| 13 Lowest Frequency       | -1916.9             |
| 14 Nucleus                | 13C                 |
| 15 Acquired Size          | 32768               |
| 16 Spectral Size          | 65536               |

131.44  
131.18  
130.92  
130.66  
125.84  
125.81  
125.78  
125.75  
124.85  
122.69

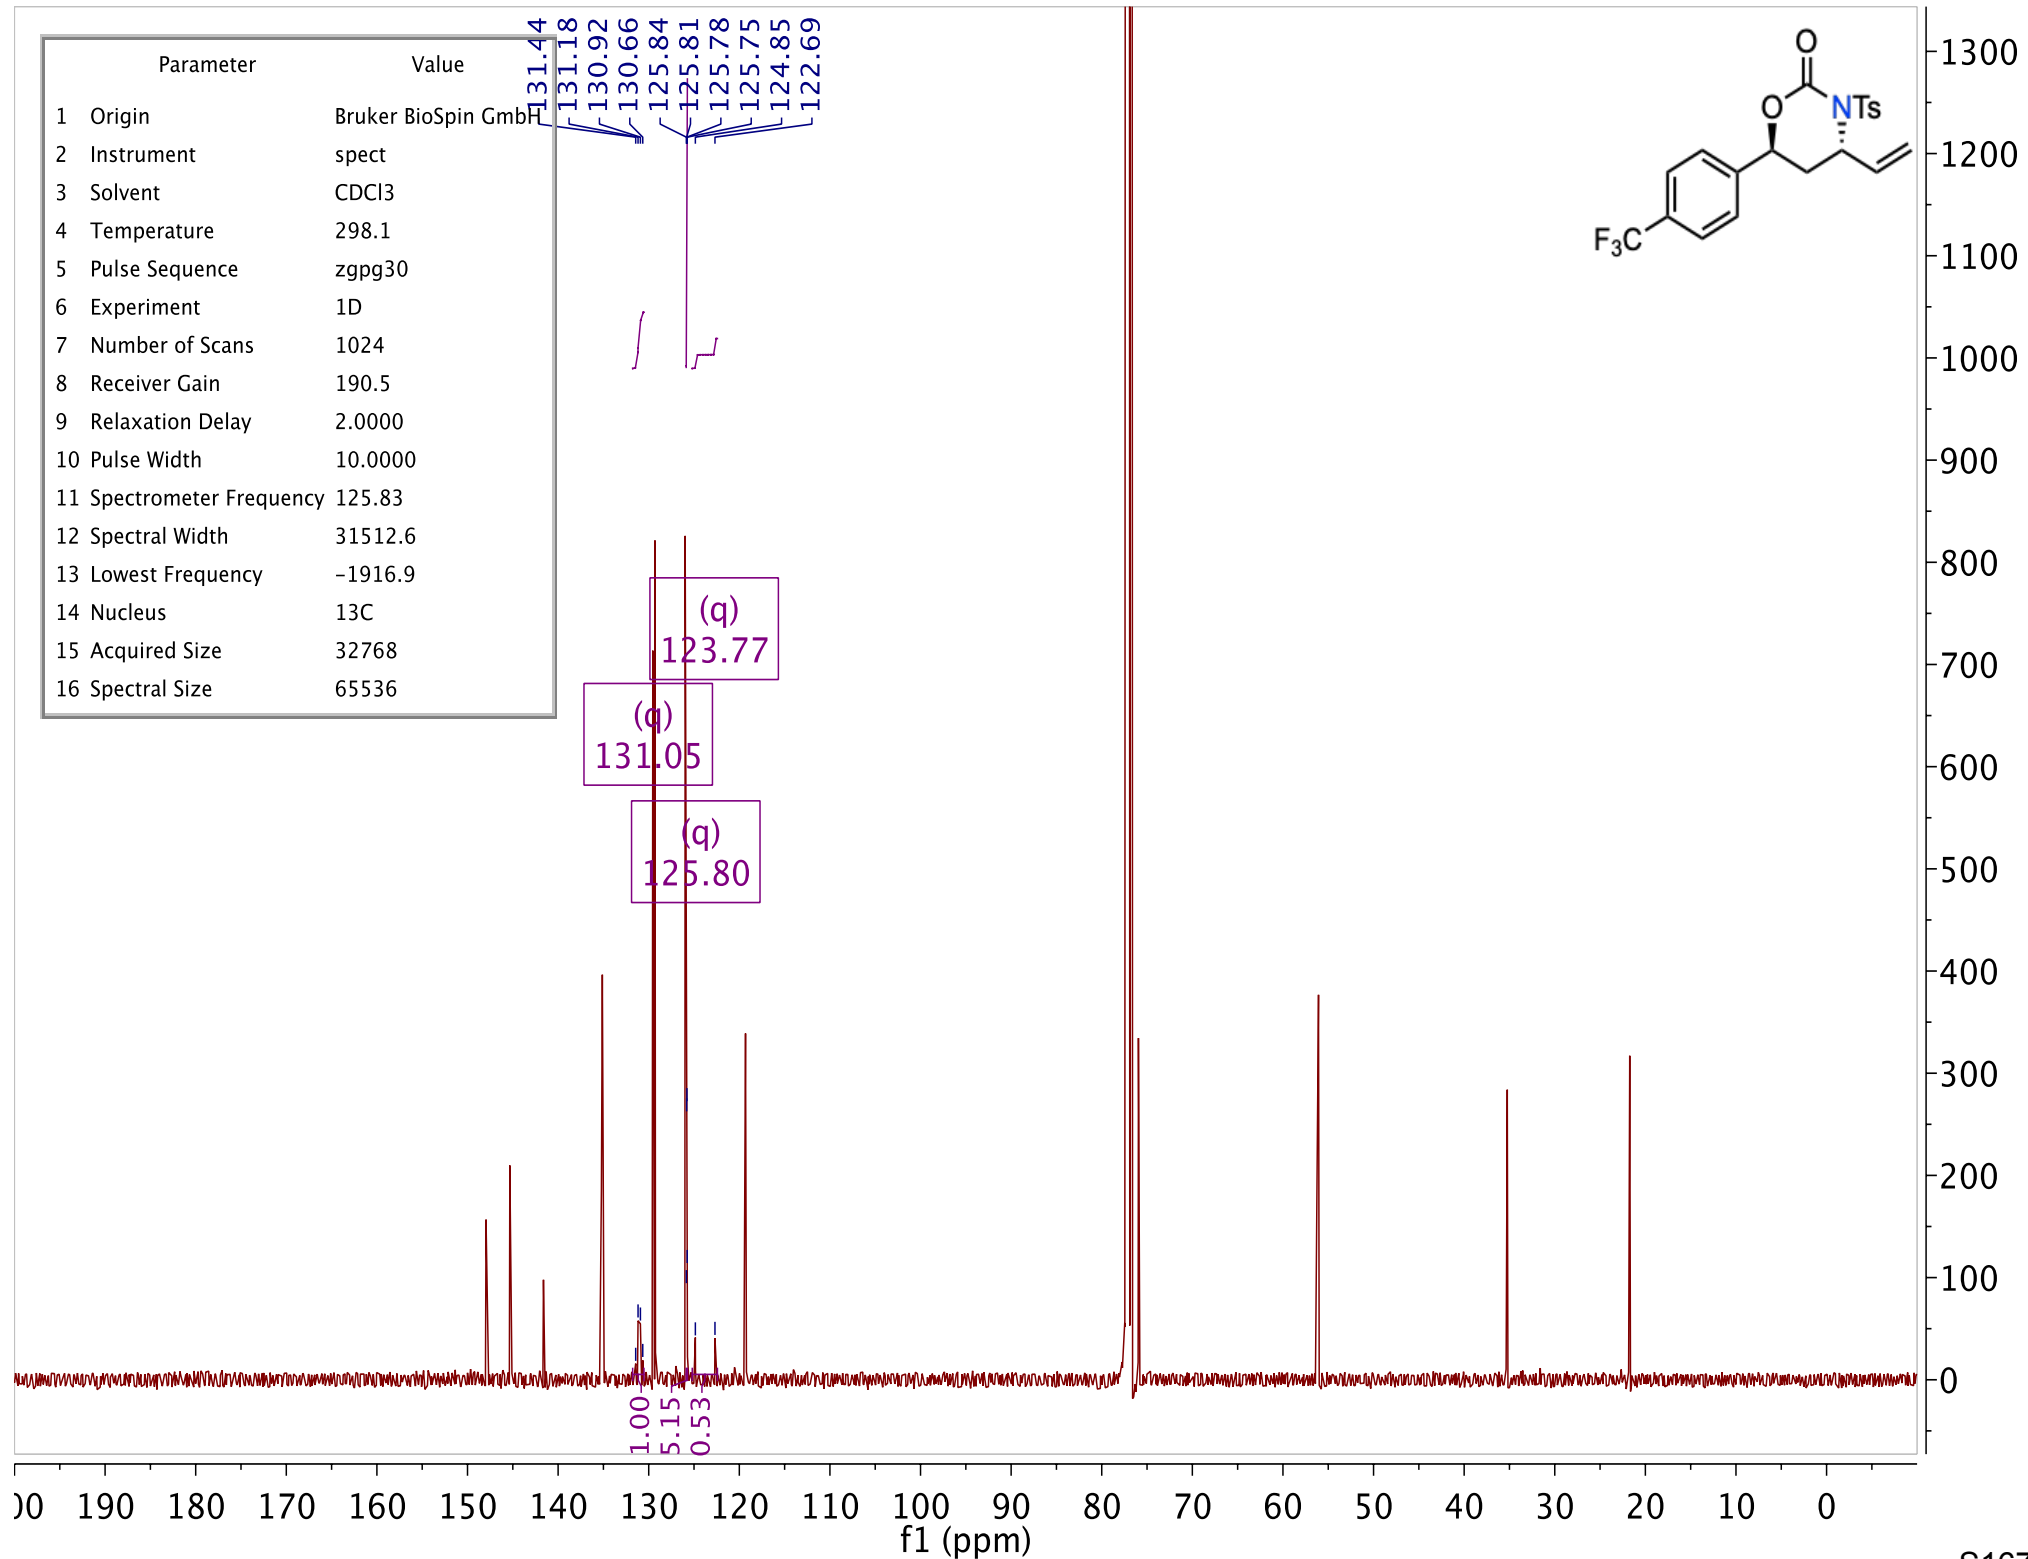

160-100 ppm

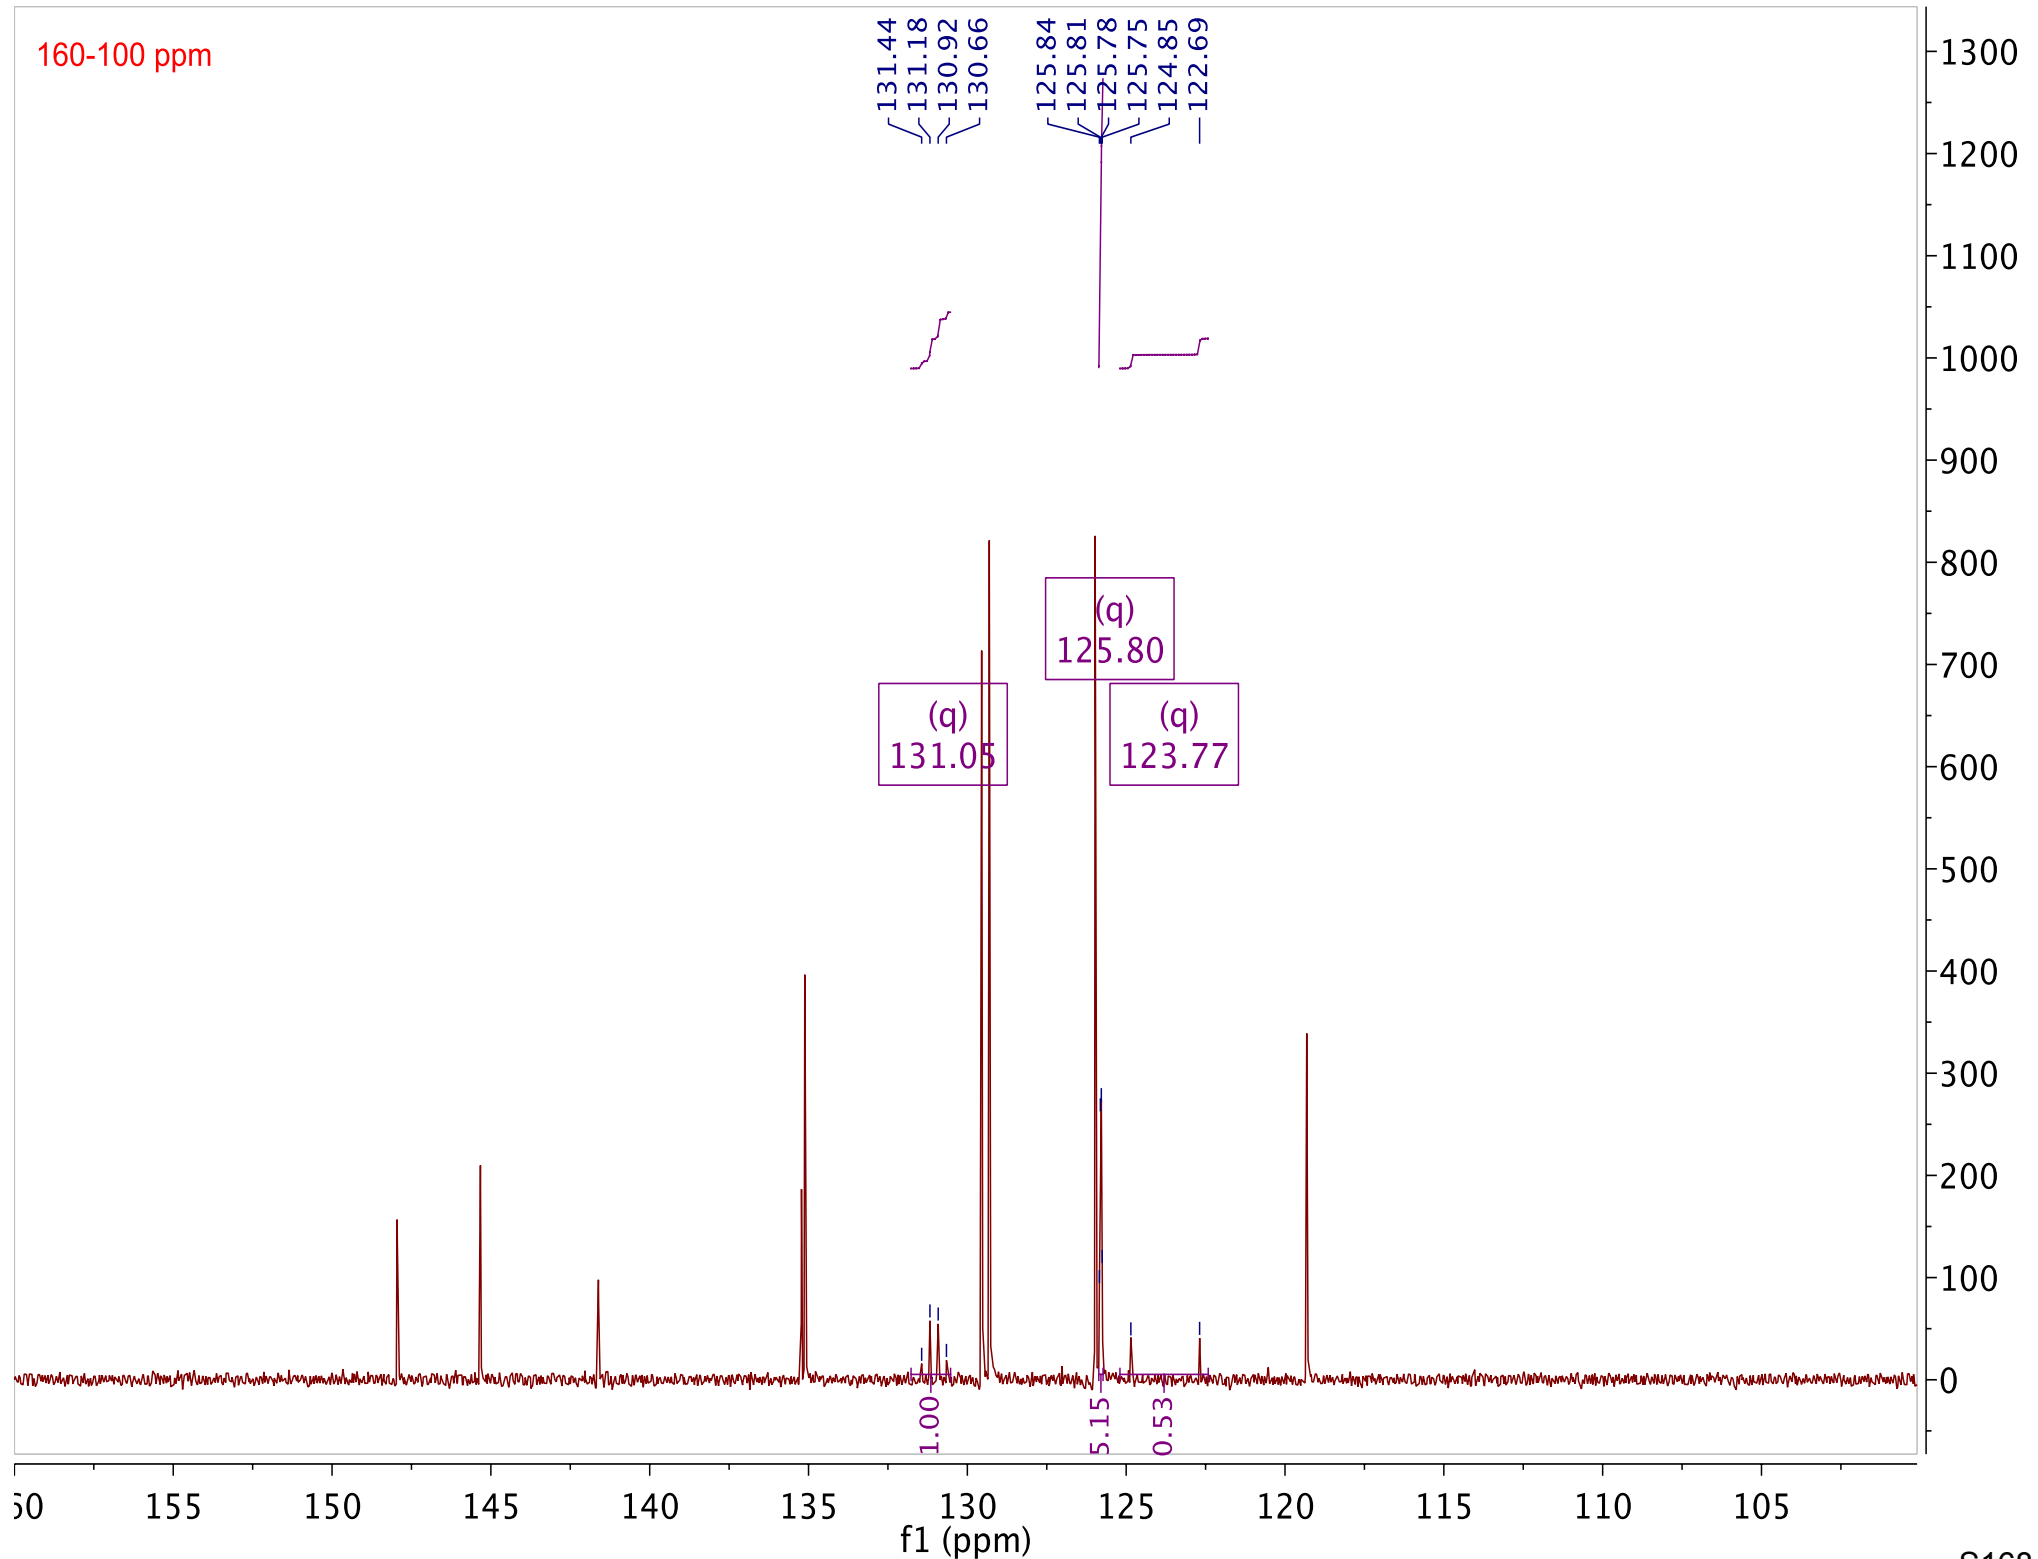

| Parameter                 | Value               |
|---------------------------|---------------------|
| 1 Origin                  | Bruker BioSpin GmbH |
| 2 Spectrometer            | spect               |
| 3 Solvent                 | CDCl3               |
| 4 Temperature             | 296.1               |
| 5 Pulse Sequence          | zg30                |
| 6 Experiment              | 1D                  |
| 7 Number of Scans         | 4                   |
| 8 Receiver Gain           | 69                  |
| 9 Relaxation Delay        | 15.0000             |
| 10 Pulse Width            | 12.0000             |
| 11 Spectrometer Frequency | 500.35              |
| 12 Spectral Width         | 10000.0             |
| 13 Lowest Frequency       | -1923.0             |
| 14 Nucleus                | 1H                  |
| 15 Acquired Size          | 32768               |
| 16 Spectral Size          | 65536               |

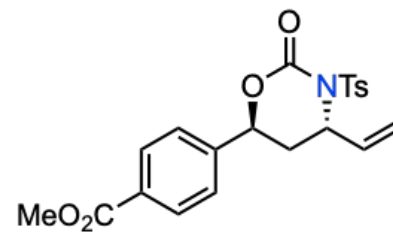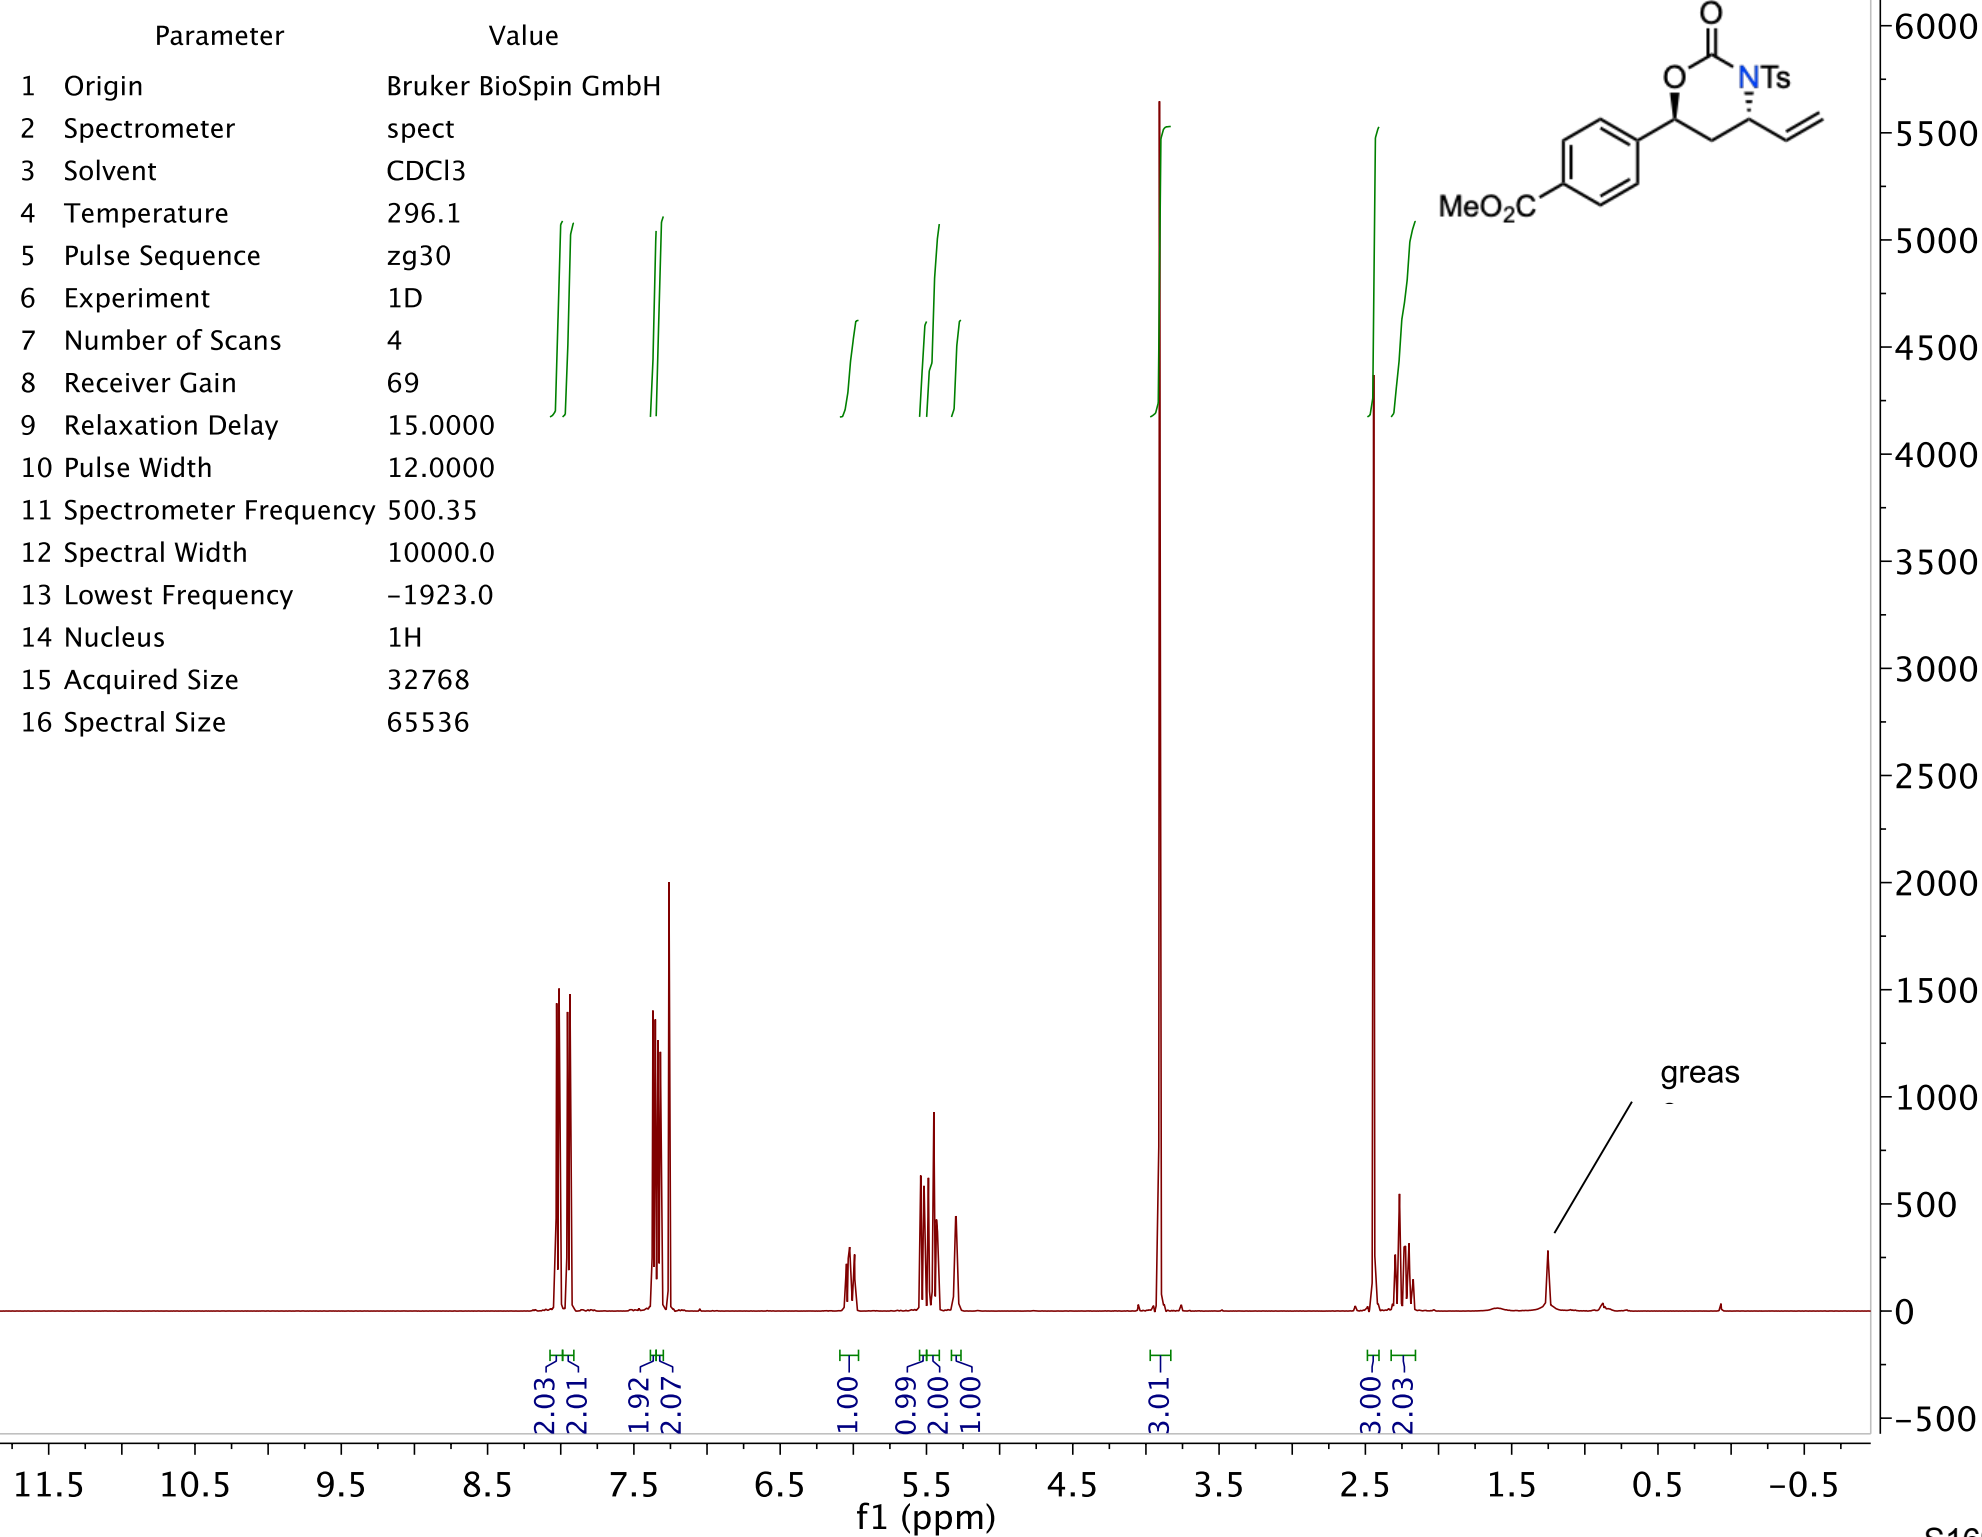

greas

| Parameter                 | Value               |
|---------------------------|---------------------|
| 1 Origin                  | Bruker BioSpin GmbH |
| 2 Spectrometer            | spect               |
| 3 Solvent                 | CDCl3               |
| 4 Temperature             | 296.1               |
| 5 Pulse Sequence          | zgpg30              |
| 6 Experiment              | 1D                  |
| 7 Number of Scans         | 800                 |
| 8 Receiver Gain           | 191                 |
| 9 Relaxation Delay        | 1.0000              |
| 10 Pulse Width            | 10.0000             |
| 11 Spectrometer Frequency | 125.83              |
| 12 Spectral Width         | 31512.6             |
| 13 Lowest Frequency       | -1901.0             |
| 14 Nucleus                | 13C                 |
| 15 Acquired Size          | 32768               |
| 16 Spectral Size          | 65536               |

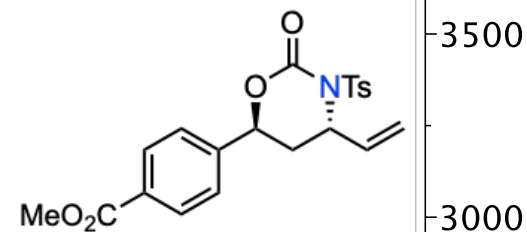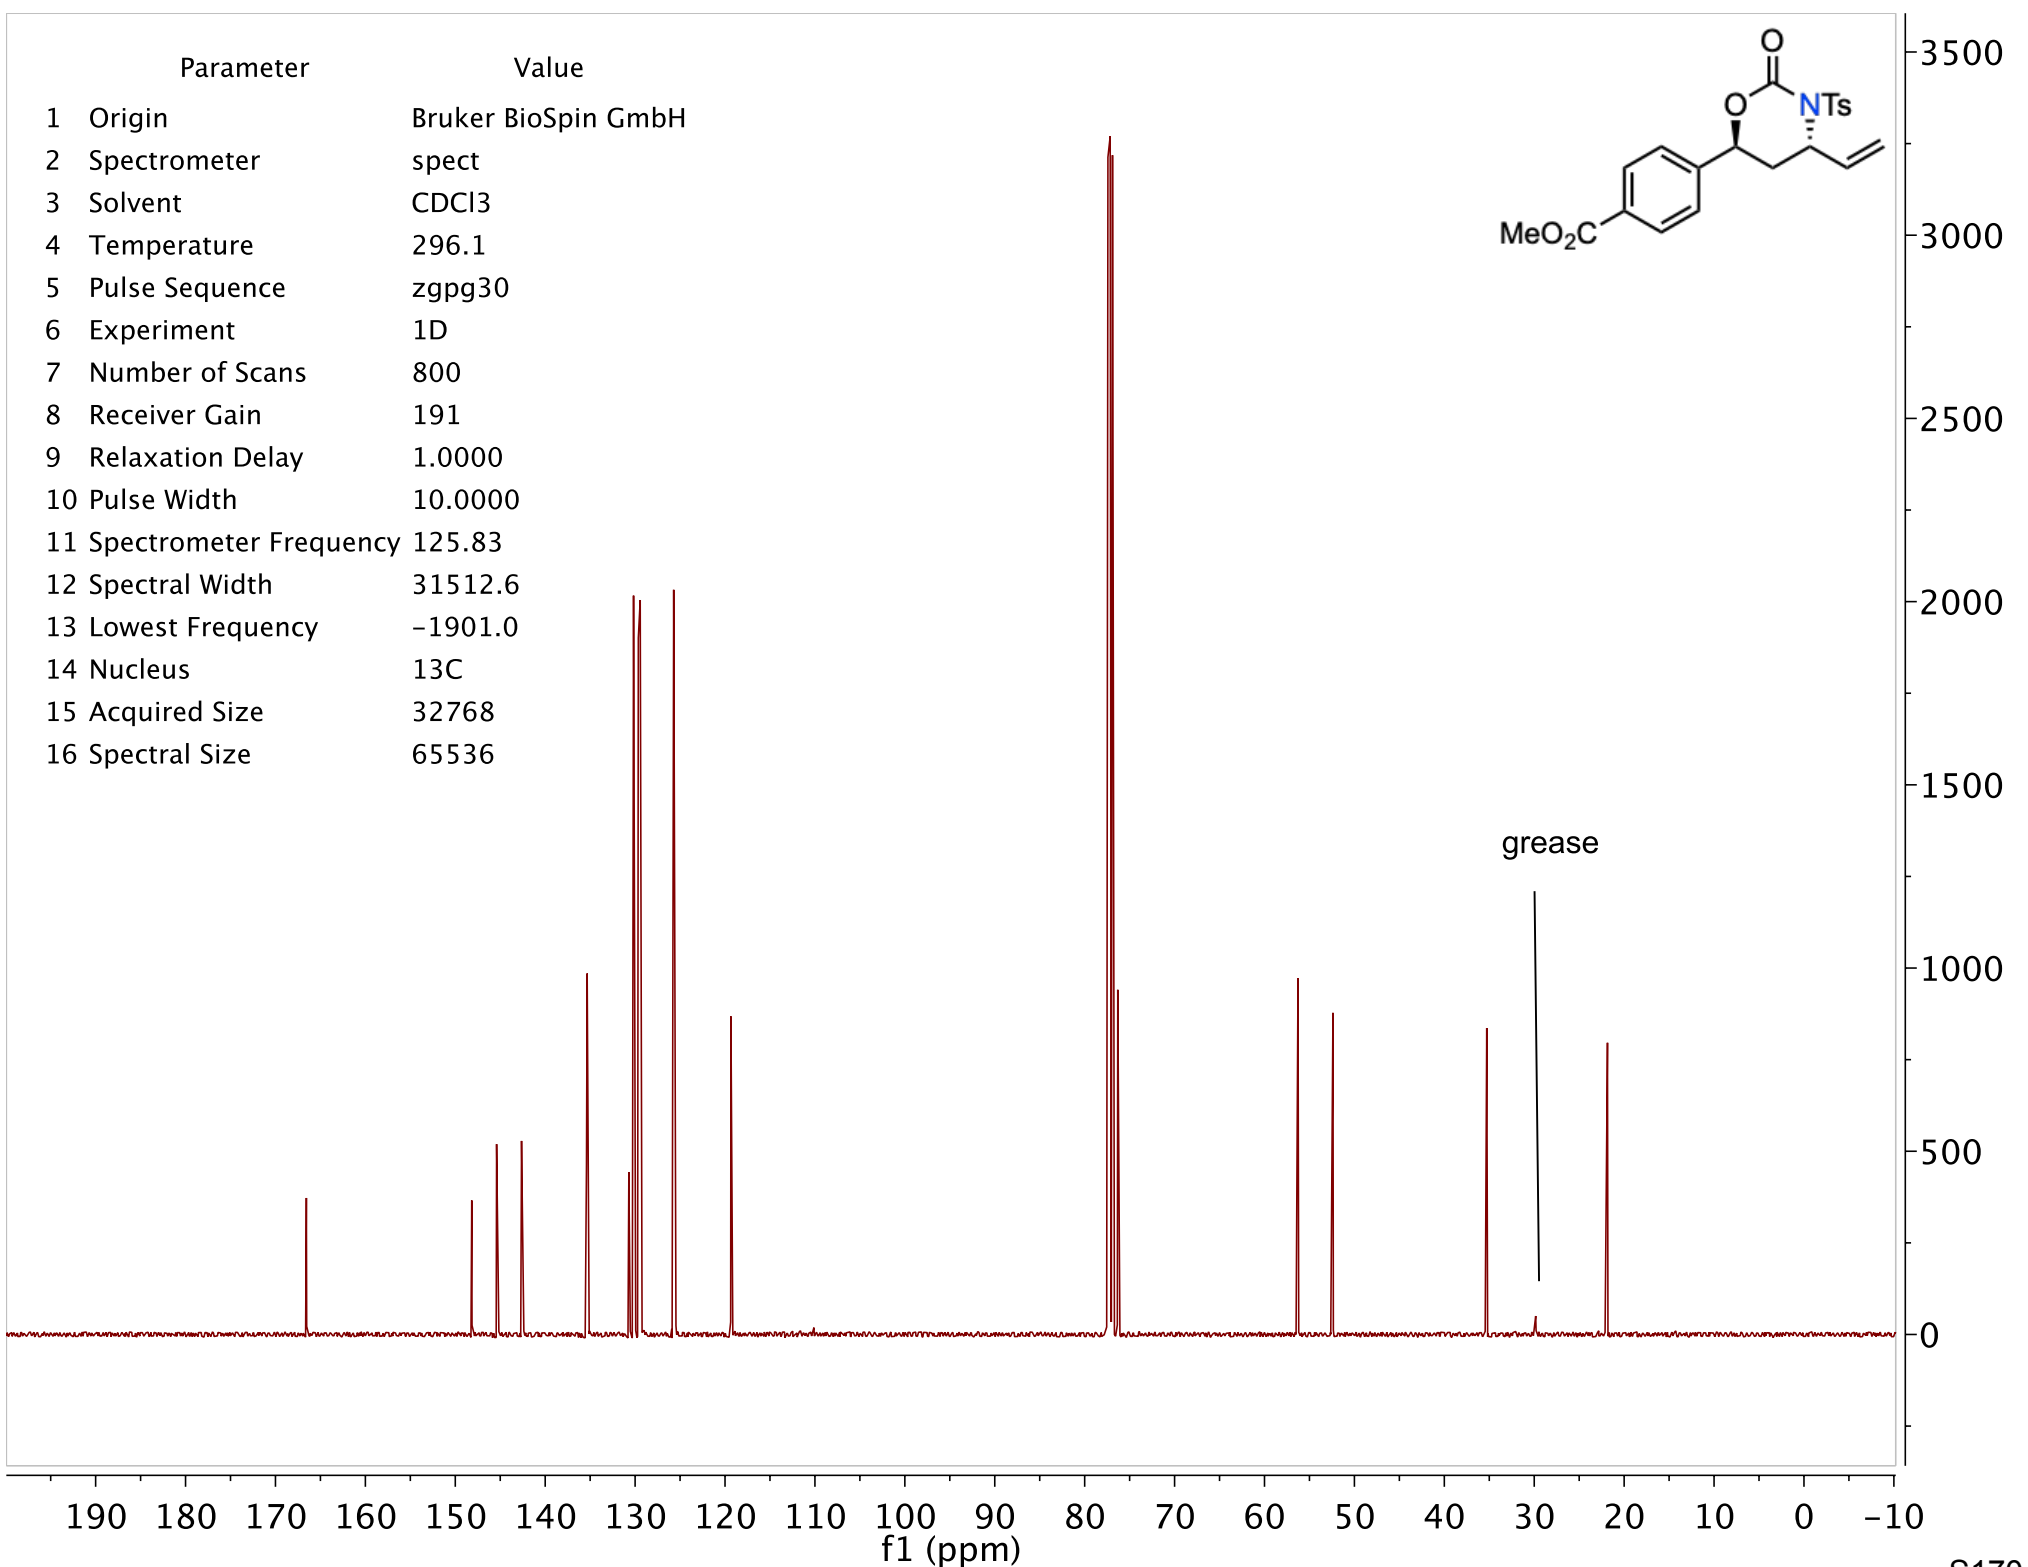

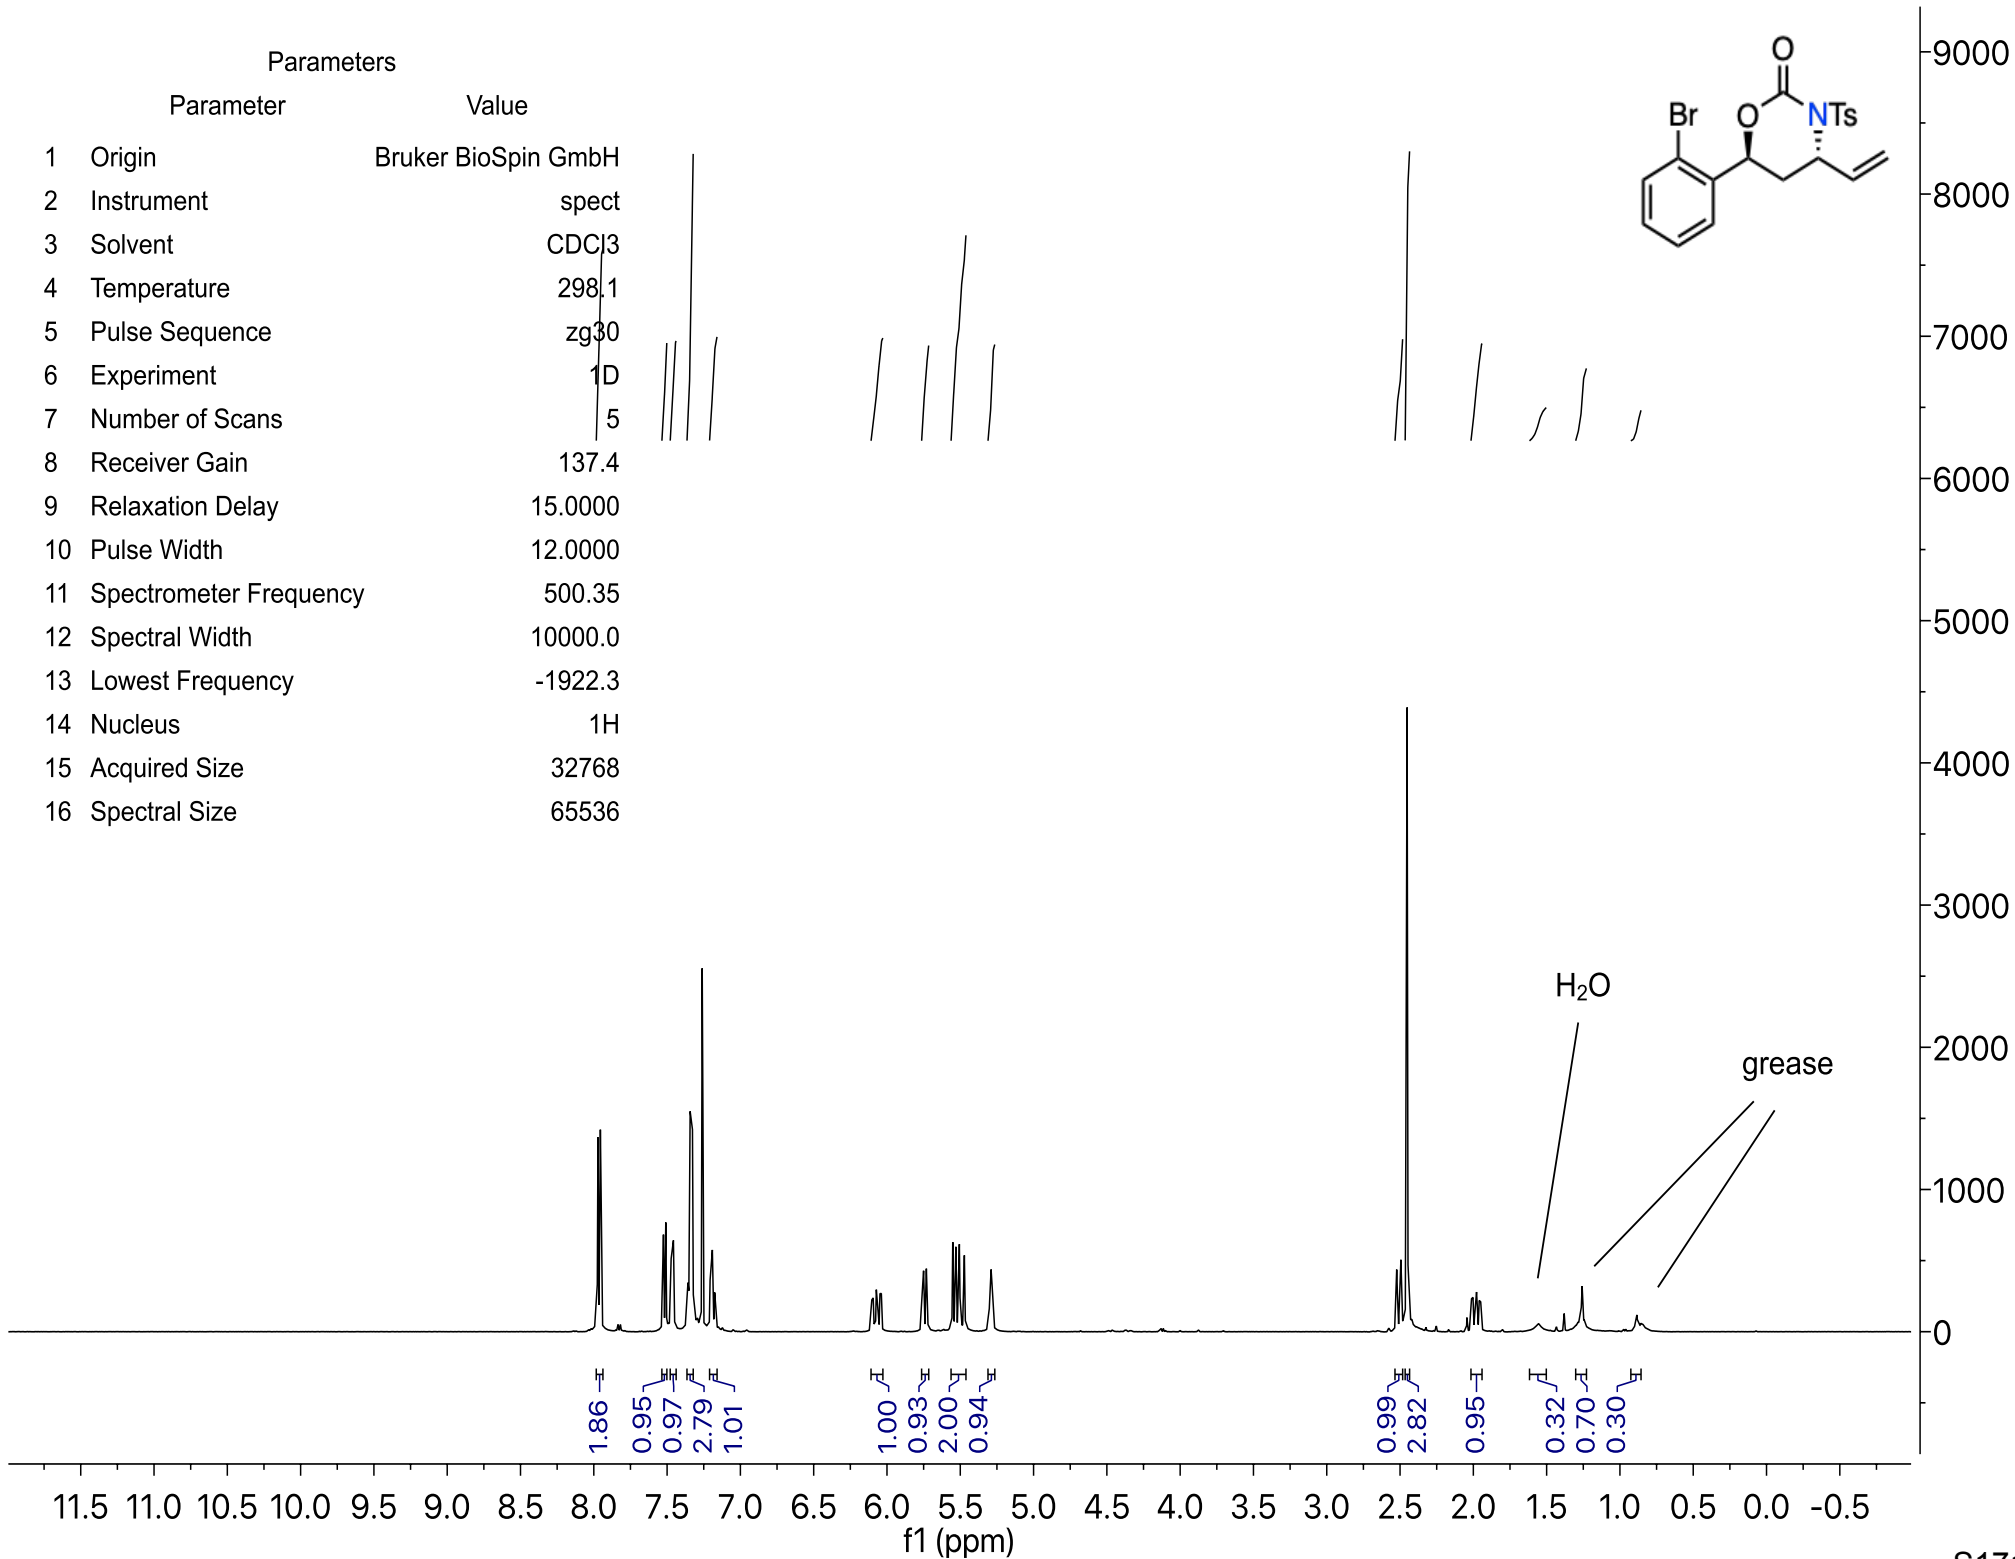

Parameters

| Parameter                 | Value               |
|---------------------------|---------------------|
| 1 Origin                  | Bruker BioSpin GmbH |
| 2 Instrument              | spect               |
| 3 Solvent                 | CDCl3               |
| 4 Temperature             | 298.2               |
| 5 Pulse Sequence          | zgpg30              |
| 6 Experiment              | 1D                  |
| 7 Number of Scans         | 512                 |
| 8 Receiver Gain           | 190.5               |
| 9 Relaxation Delay        | 1.0000              |
| 10 Pulse Width            | 10.0000             |
| 11 Spectrometer Frequency | 125.83              |
| 12 Spectral Width         | 31512.6             |
| 13 Lowest Frequency       | -1898.5             |
| 14 Nucleus                | <sup>13</sup> C     |
| 15 Acquired Size          | 32768               |
| 16 Spectral Size          | 65536               |

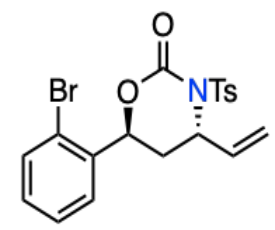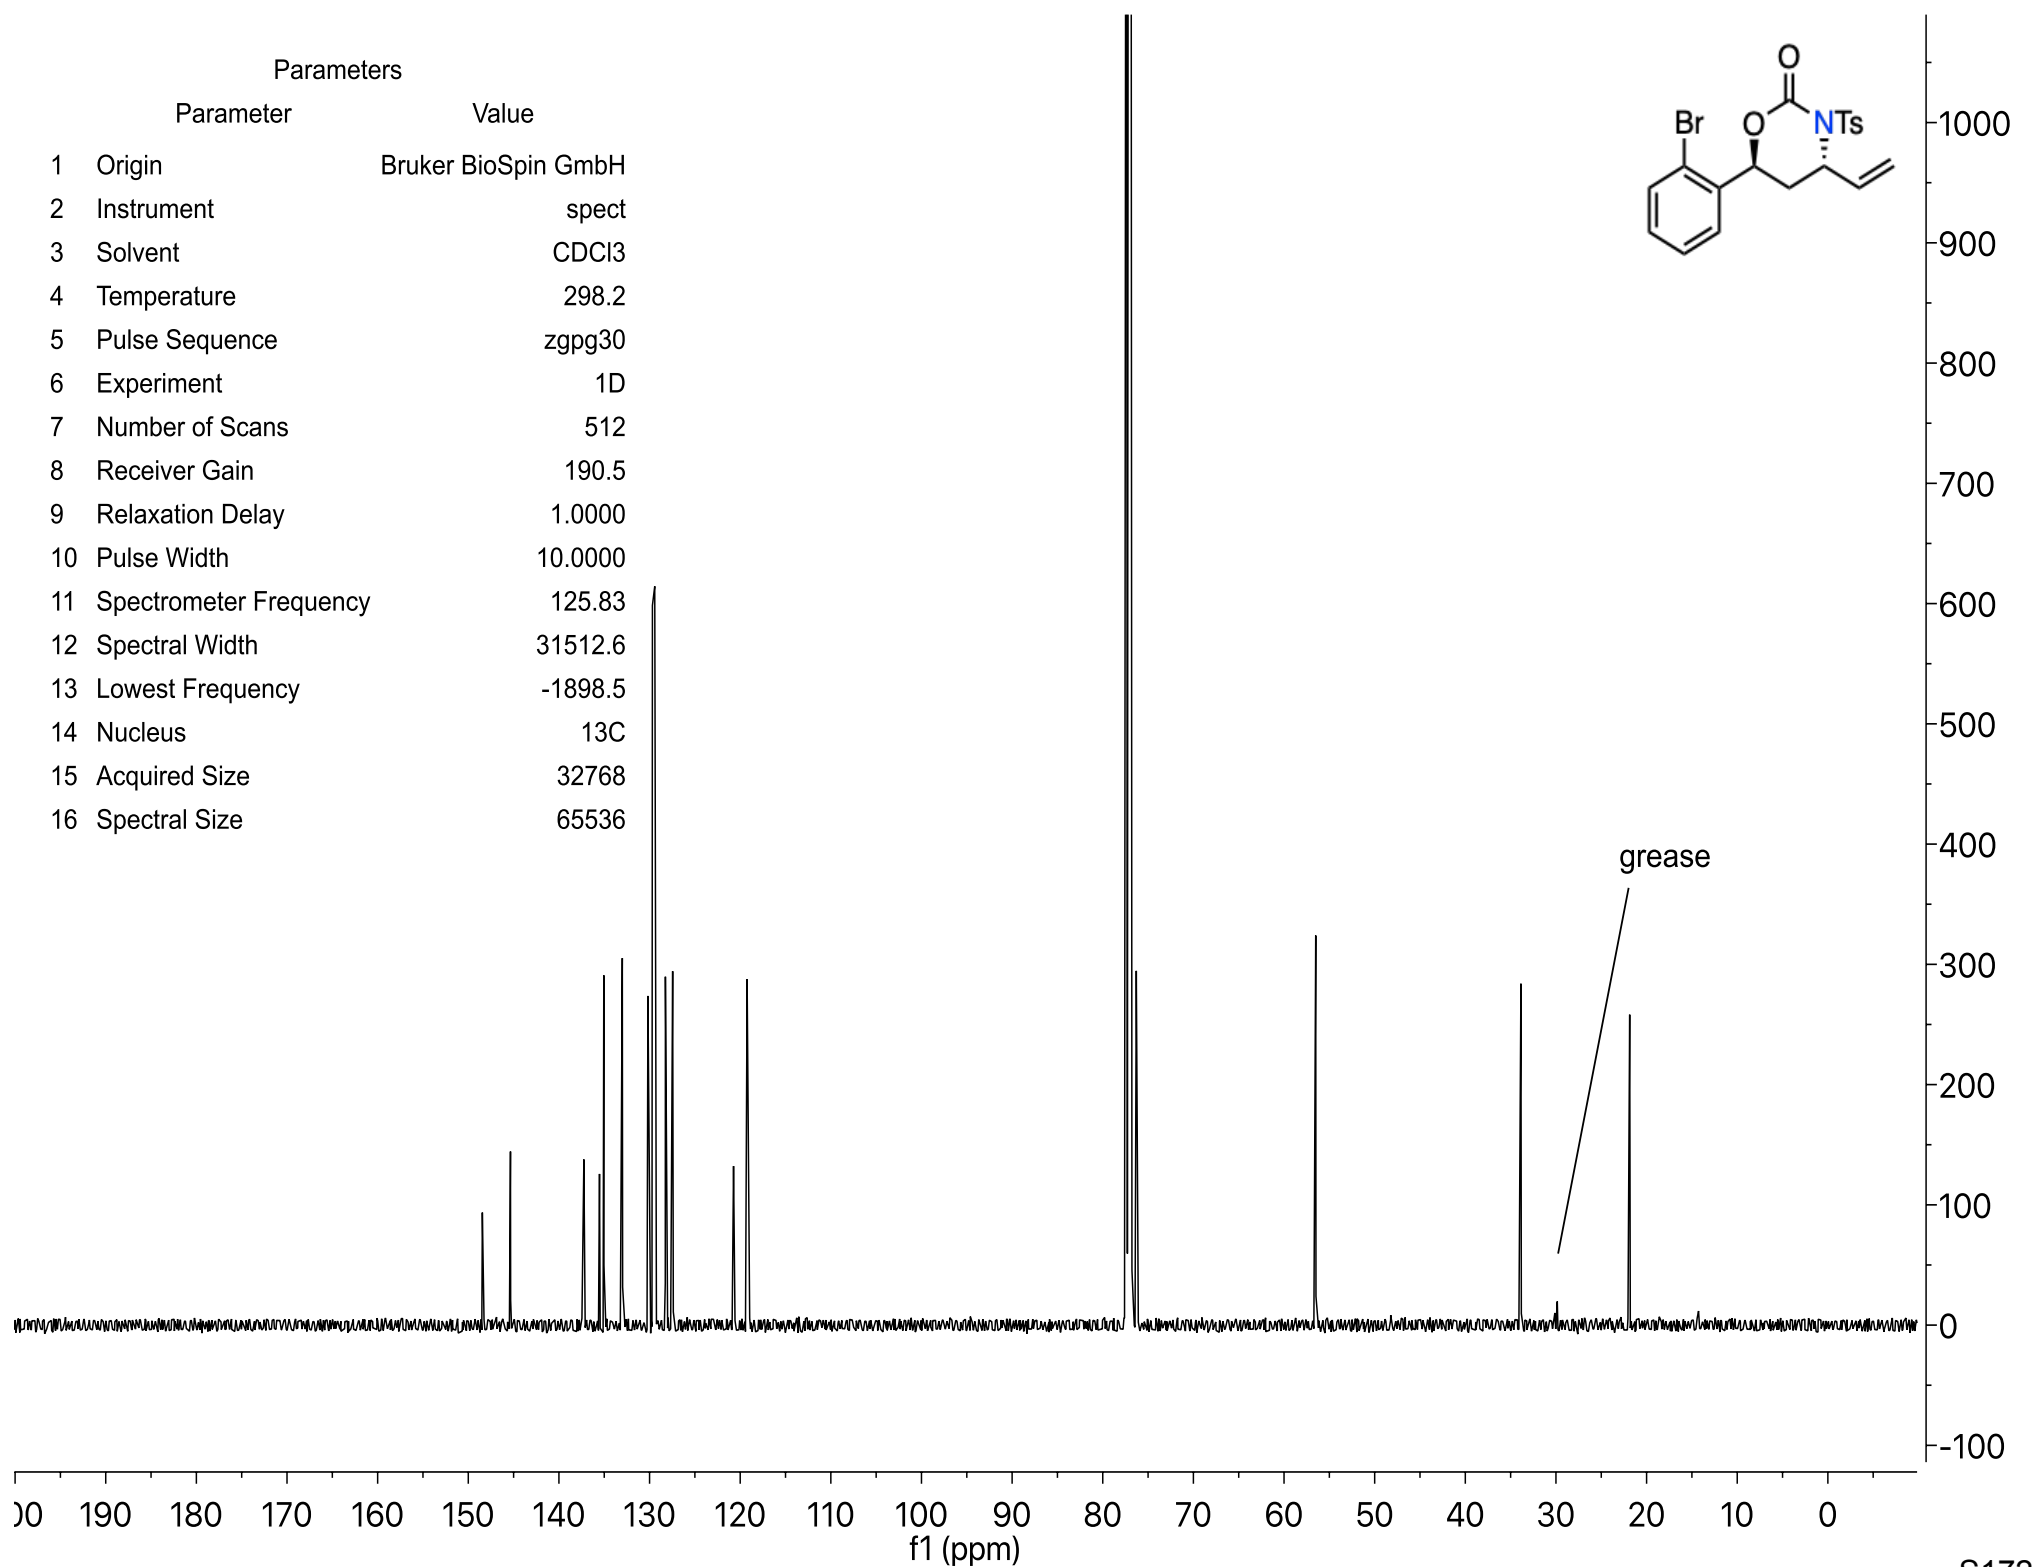

| Parameter                 | Value               |
|---------------------------|---------------------|
| 1 Origin                  | Bruker BioSpin GmbH |
| 2 Instrument              | spect               |
| 3 Solvent                 | CDCl3               |
| 4 Temperature             | 298.0               |
| 5 Pulse Sequence          | zg30                |
| 6 Experiment              | 1D                  |
| 7 Number of Scans         | 16                  |
| 8 Receiver Gain           | 94.3                |
| 9 Relaxation Delay        | 15.0000             |
| 10 Pulse Width            | 12.0000             |
| 11 Spectrometer Frequency | 500.35              |
| 12 Spectral Width         | 10000.0             |
| 13 Lowest Frequency       | -1922.8             |
| 14 Nucleus                | 1H                  |
| 15 Acquired Size          | 32768               |
| 16 Spectral Size          | 65536               |

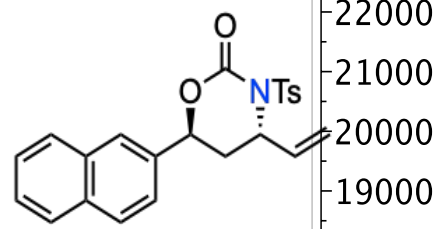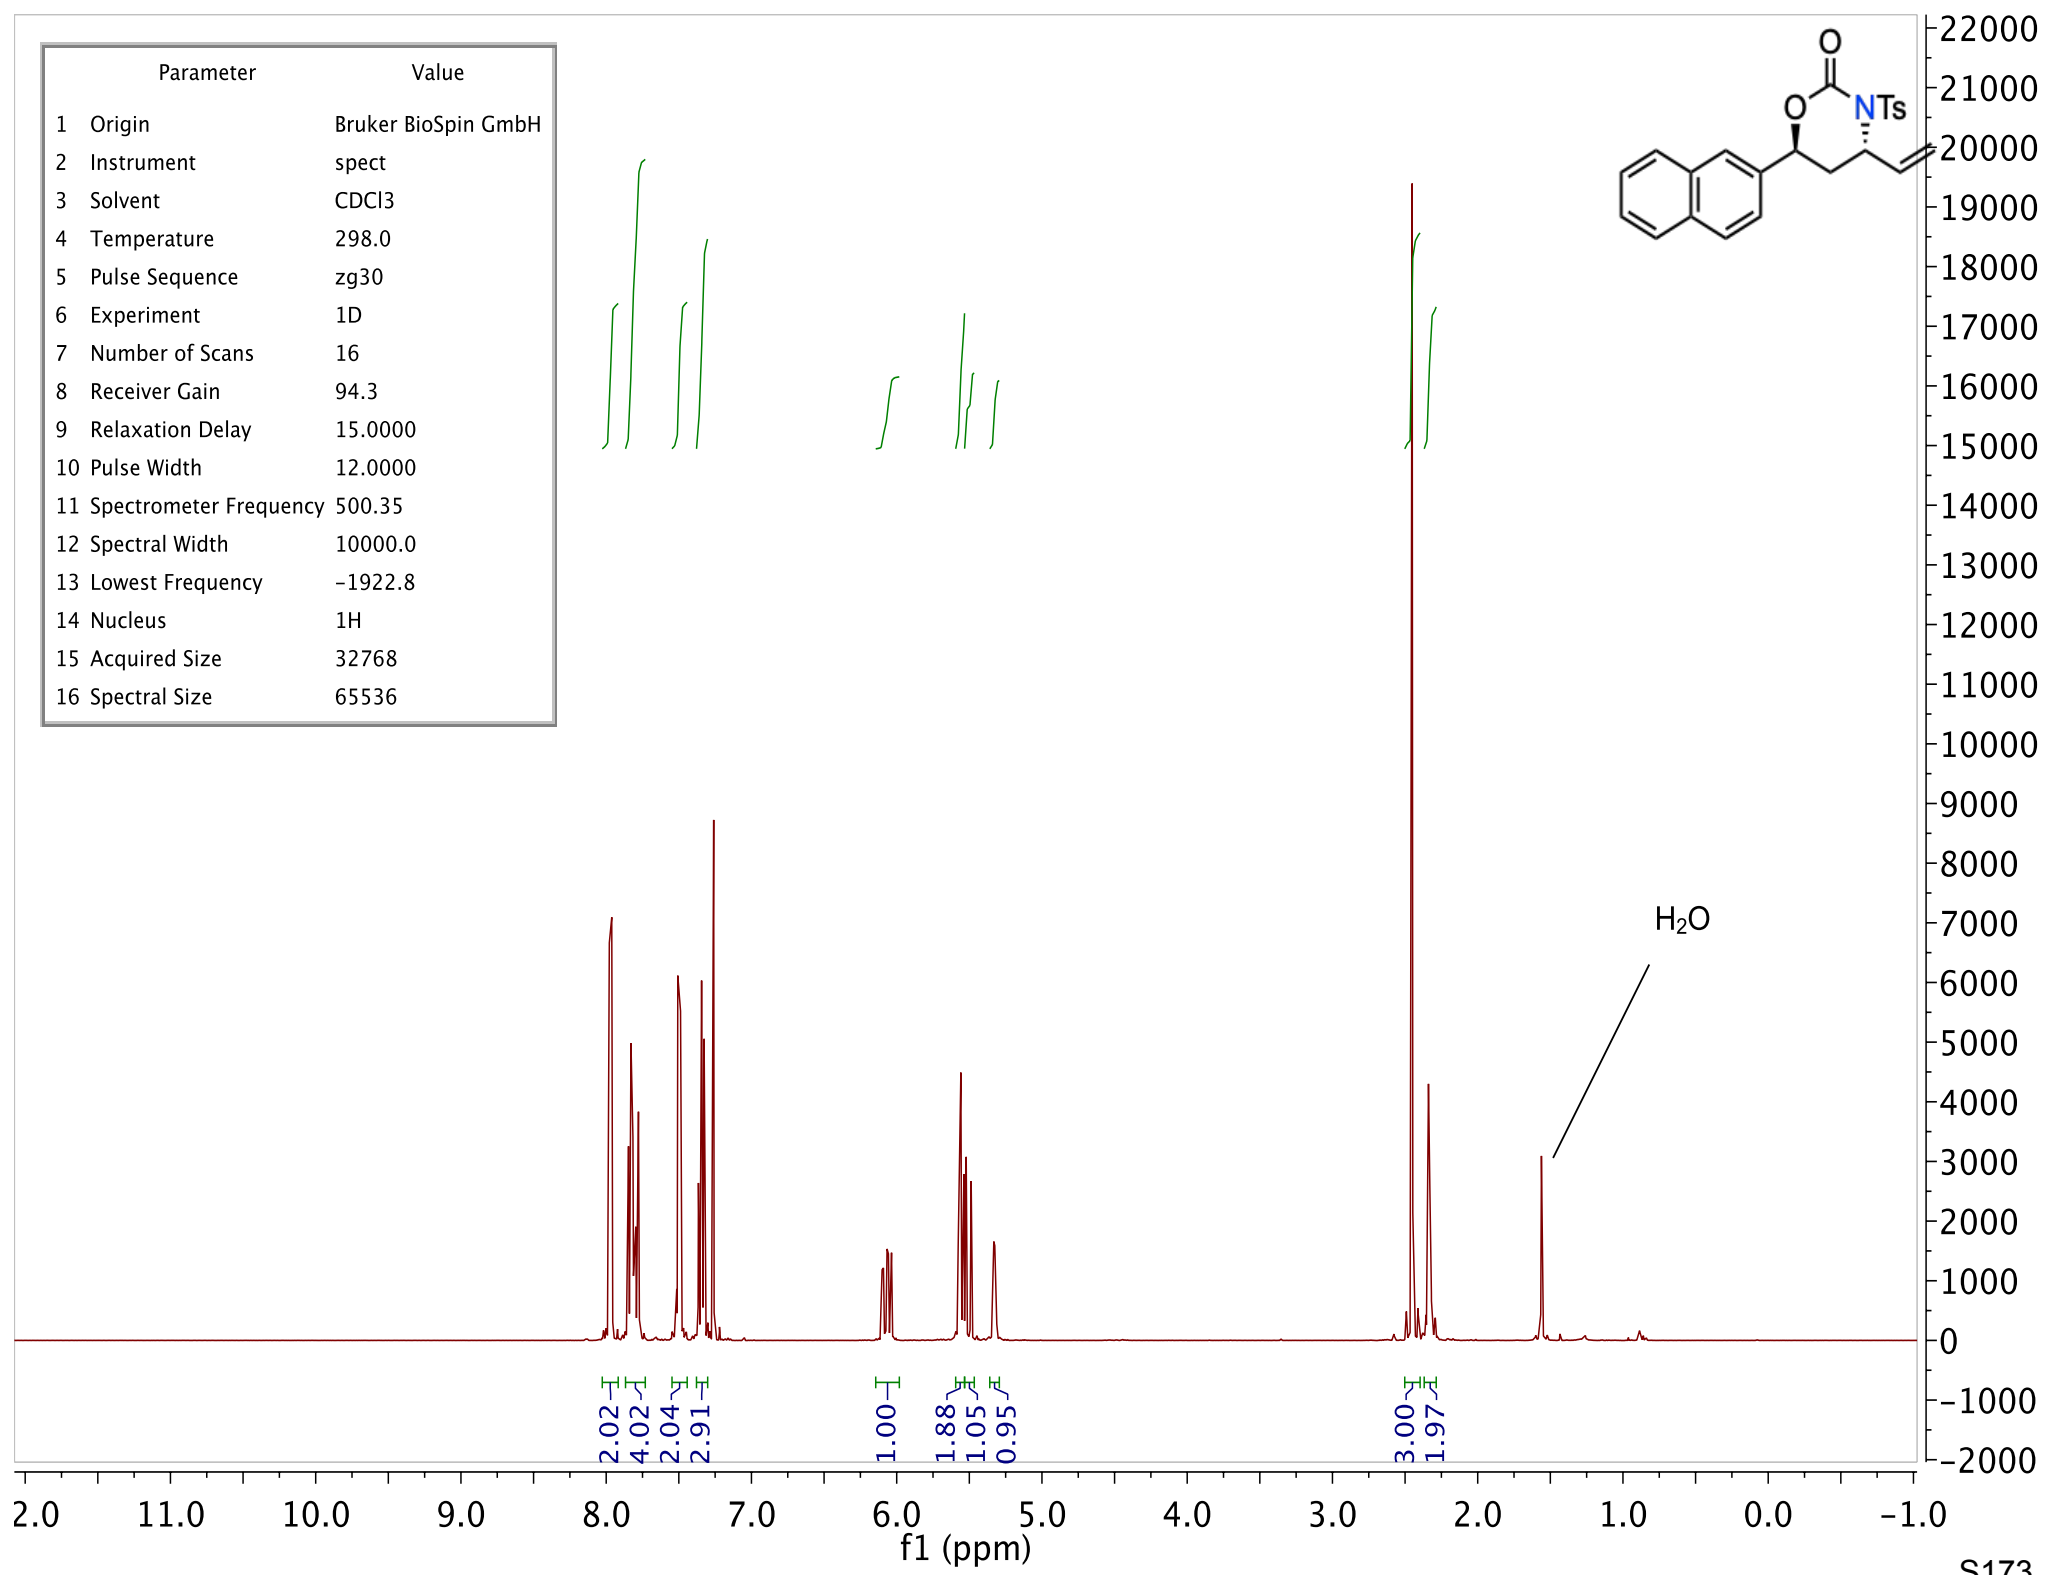

H<sub>2</sub>O

| Parameter                 | Value               |
|---------------------------|---------------------|
| 1 Origin                  | Bruker BioSpin GmbH |
| 2 Instrument              | spect               |
| 3 Solvent                 | CDCl3               |
| 4 Temperature             | 298.0               |
| 5 Pulse Sequence          | zgpg30              |
| 6 Experiment              | 1D                  |
| 7 Number of Scans         | 264                 |
| 8 Receiver Gain           | 190.5               |
| 9 Relaxation Delay        | 2.0000              |
| 10 Pulse Width            | 10.0000             |
| 11 Spectrometer Frequency | 125.83              |
| 12 Spectral Width         | 31512.6             |
| 13 Lowest Frequency       | -1900.6             |
| 14 Nucleus                | 13C                 |
| 15 Acquired Size          | 32768               |
| 16 Spectral Size          | 65536               |

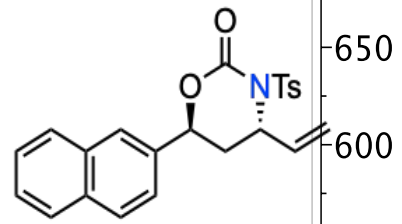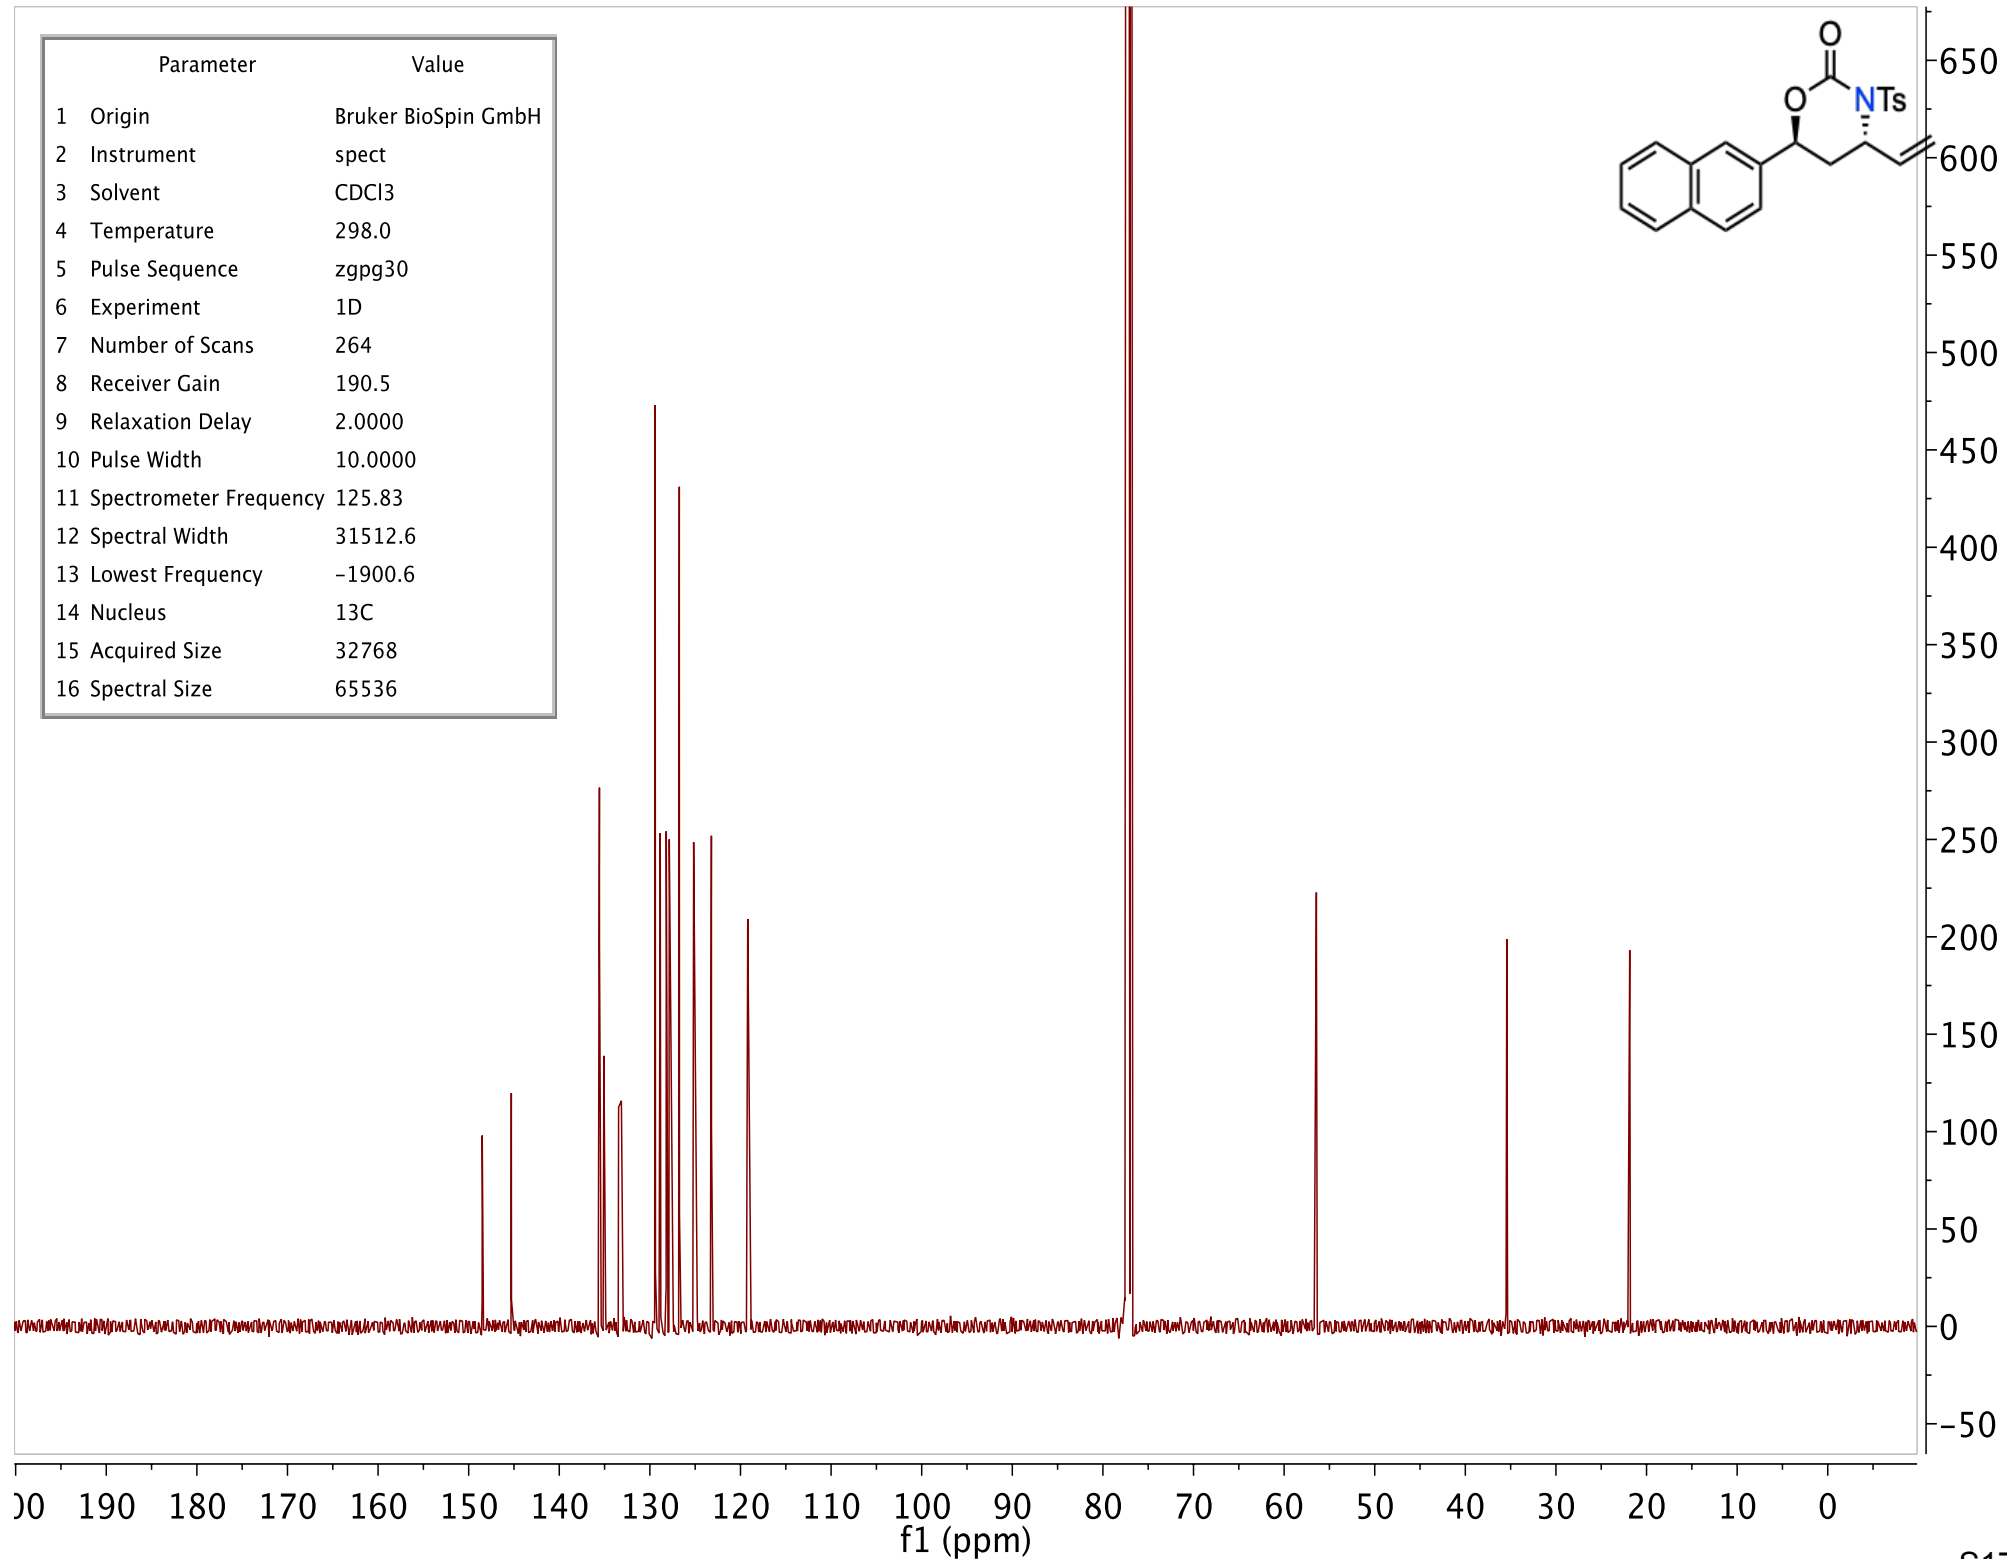



160-110 ppm

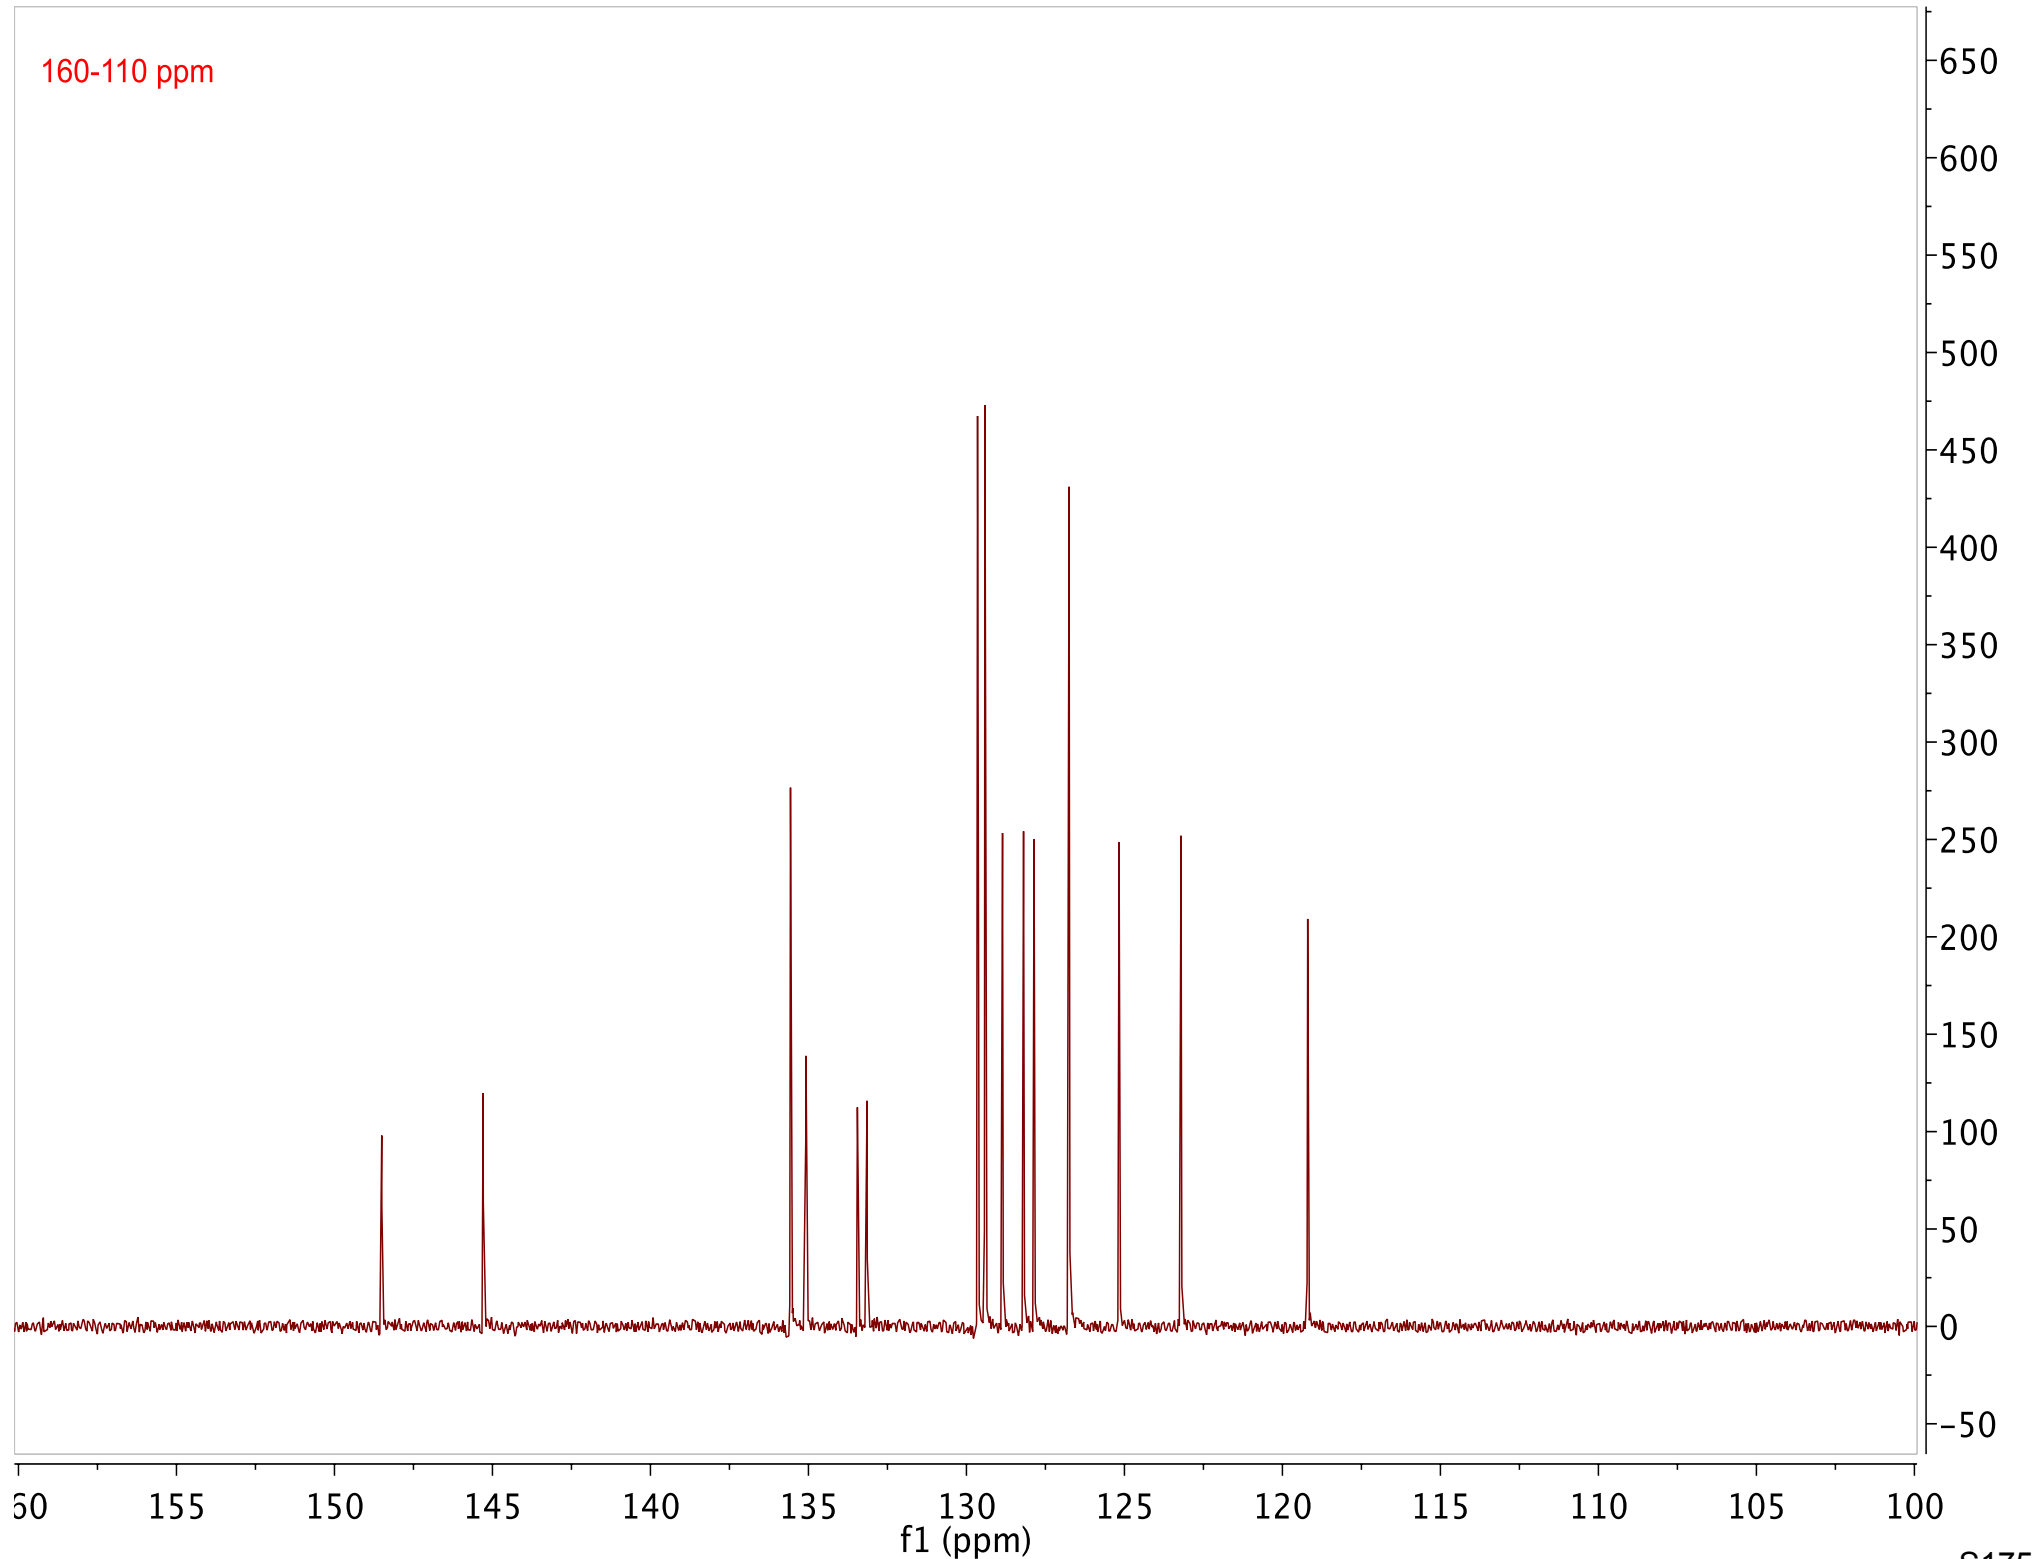

| Parameter                 | Value               |
|---------------------------|---------------------|
| 1 Origin                  | Bruker BioSpin GmbH |
| 2 Spectrometer            | spect               |
| 3 Solvent                 | CDCl3               |
| 4 Temperature             | 296.1               |
| 5 Pulse Sequence          | zg30                |
| 6 Experiment              | 1D                  |
| 7 Number of Scans         | 6                   |
| 8 Receiver Gain           | 94                  |
| 9 Relaxation Delay        | 15.0000             |
| 10 Pulse Width            | 12.0000             |
| 11 Spectrometer Frequency | 500.35              |
| 12 Spectral Width         | 10000.0             |
| 13 Lowest Frequency       | -1922.9             |
| 14 Nucleus                | 1H                  |
| 15 Acquired Size          | 32768               |
| 16 Spectral Size          | 65536               |

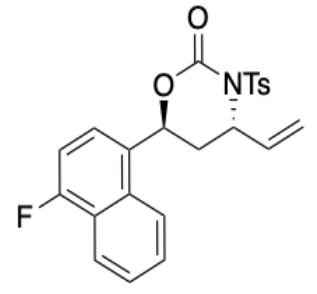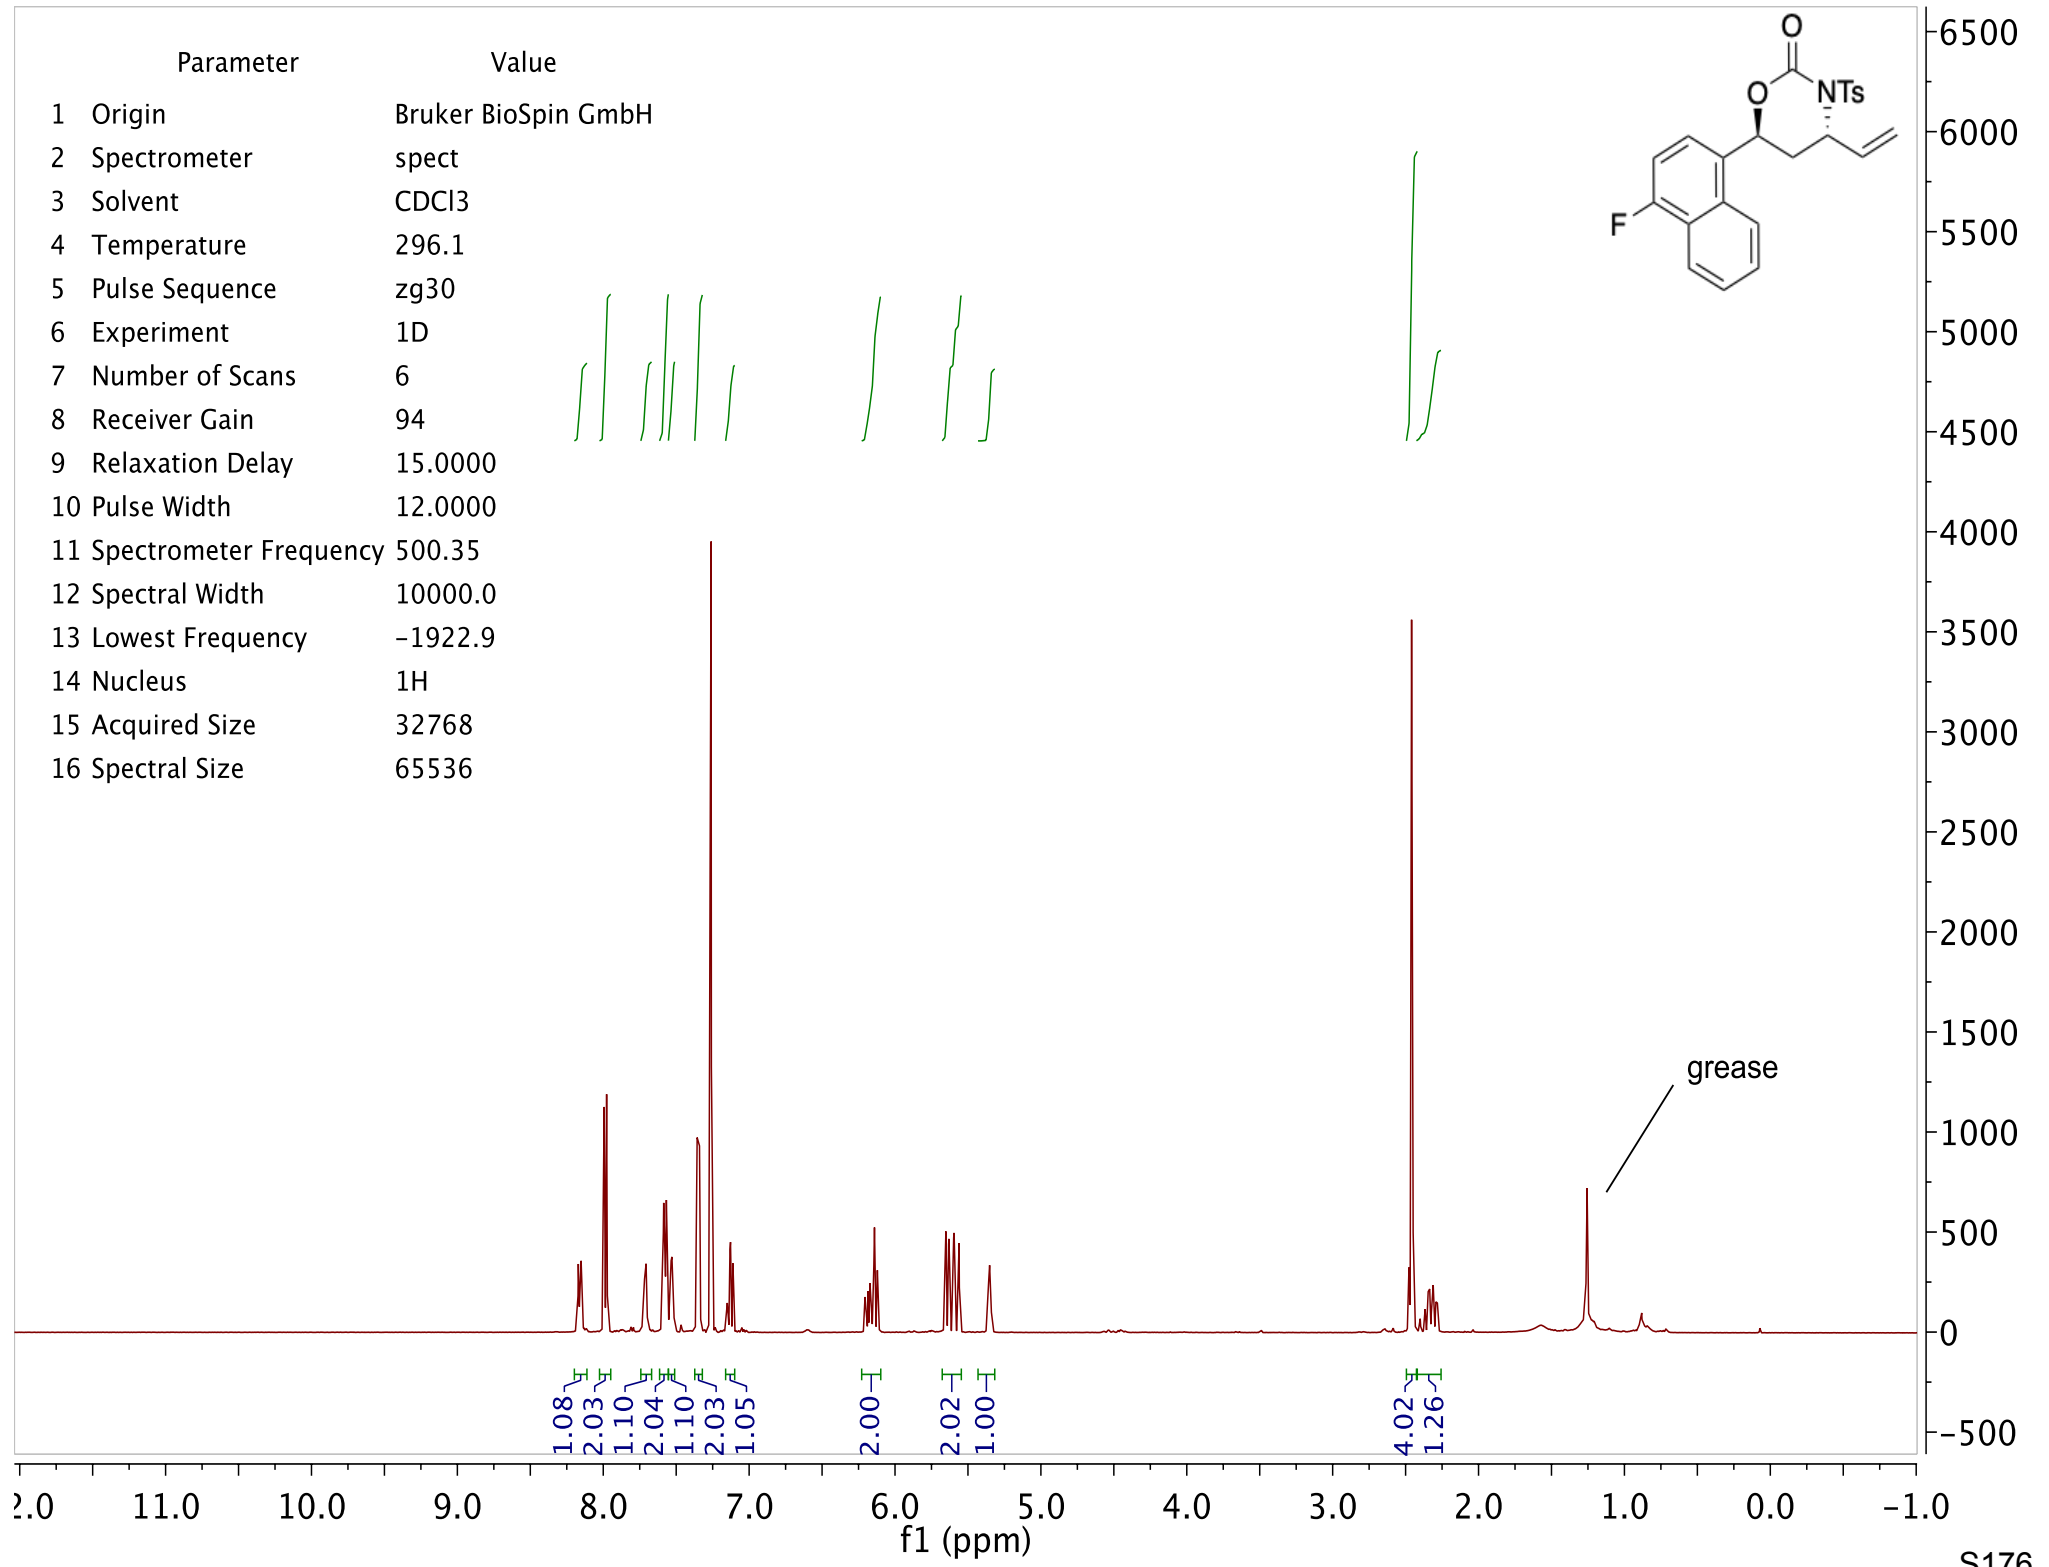

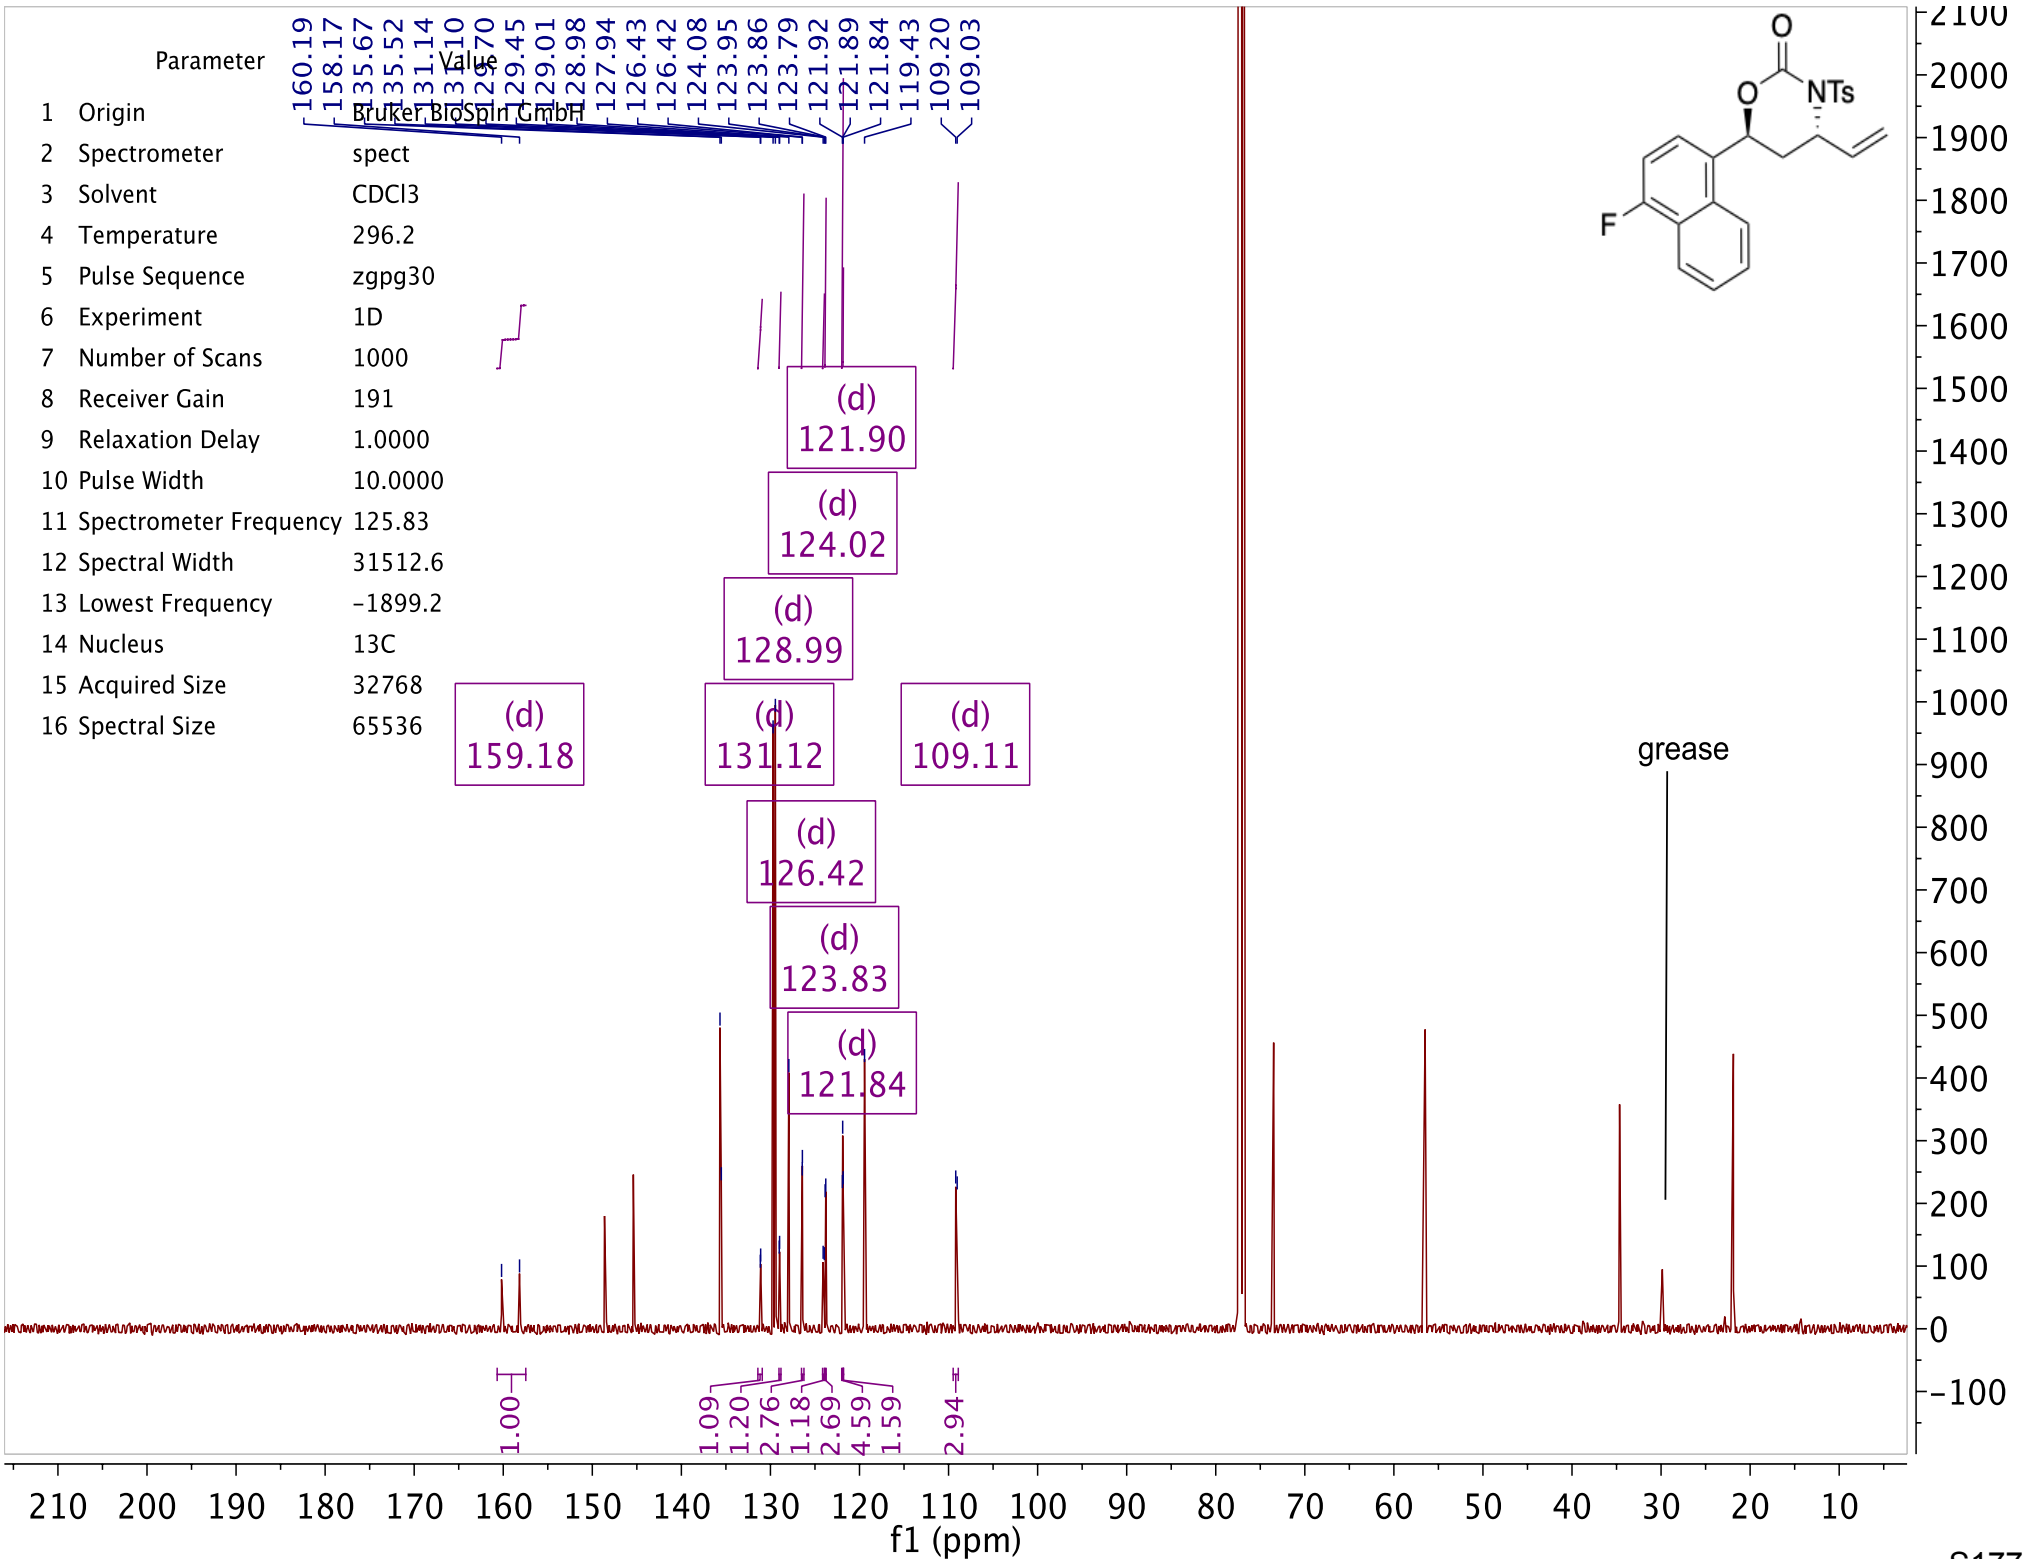

180-140ppm

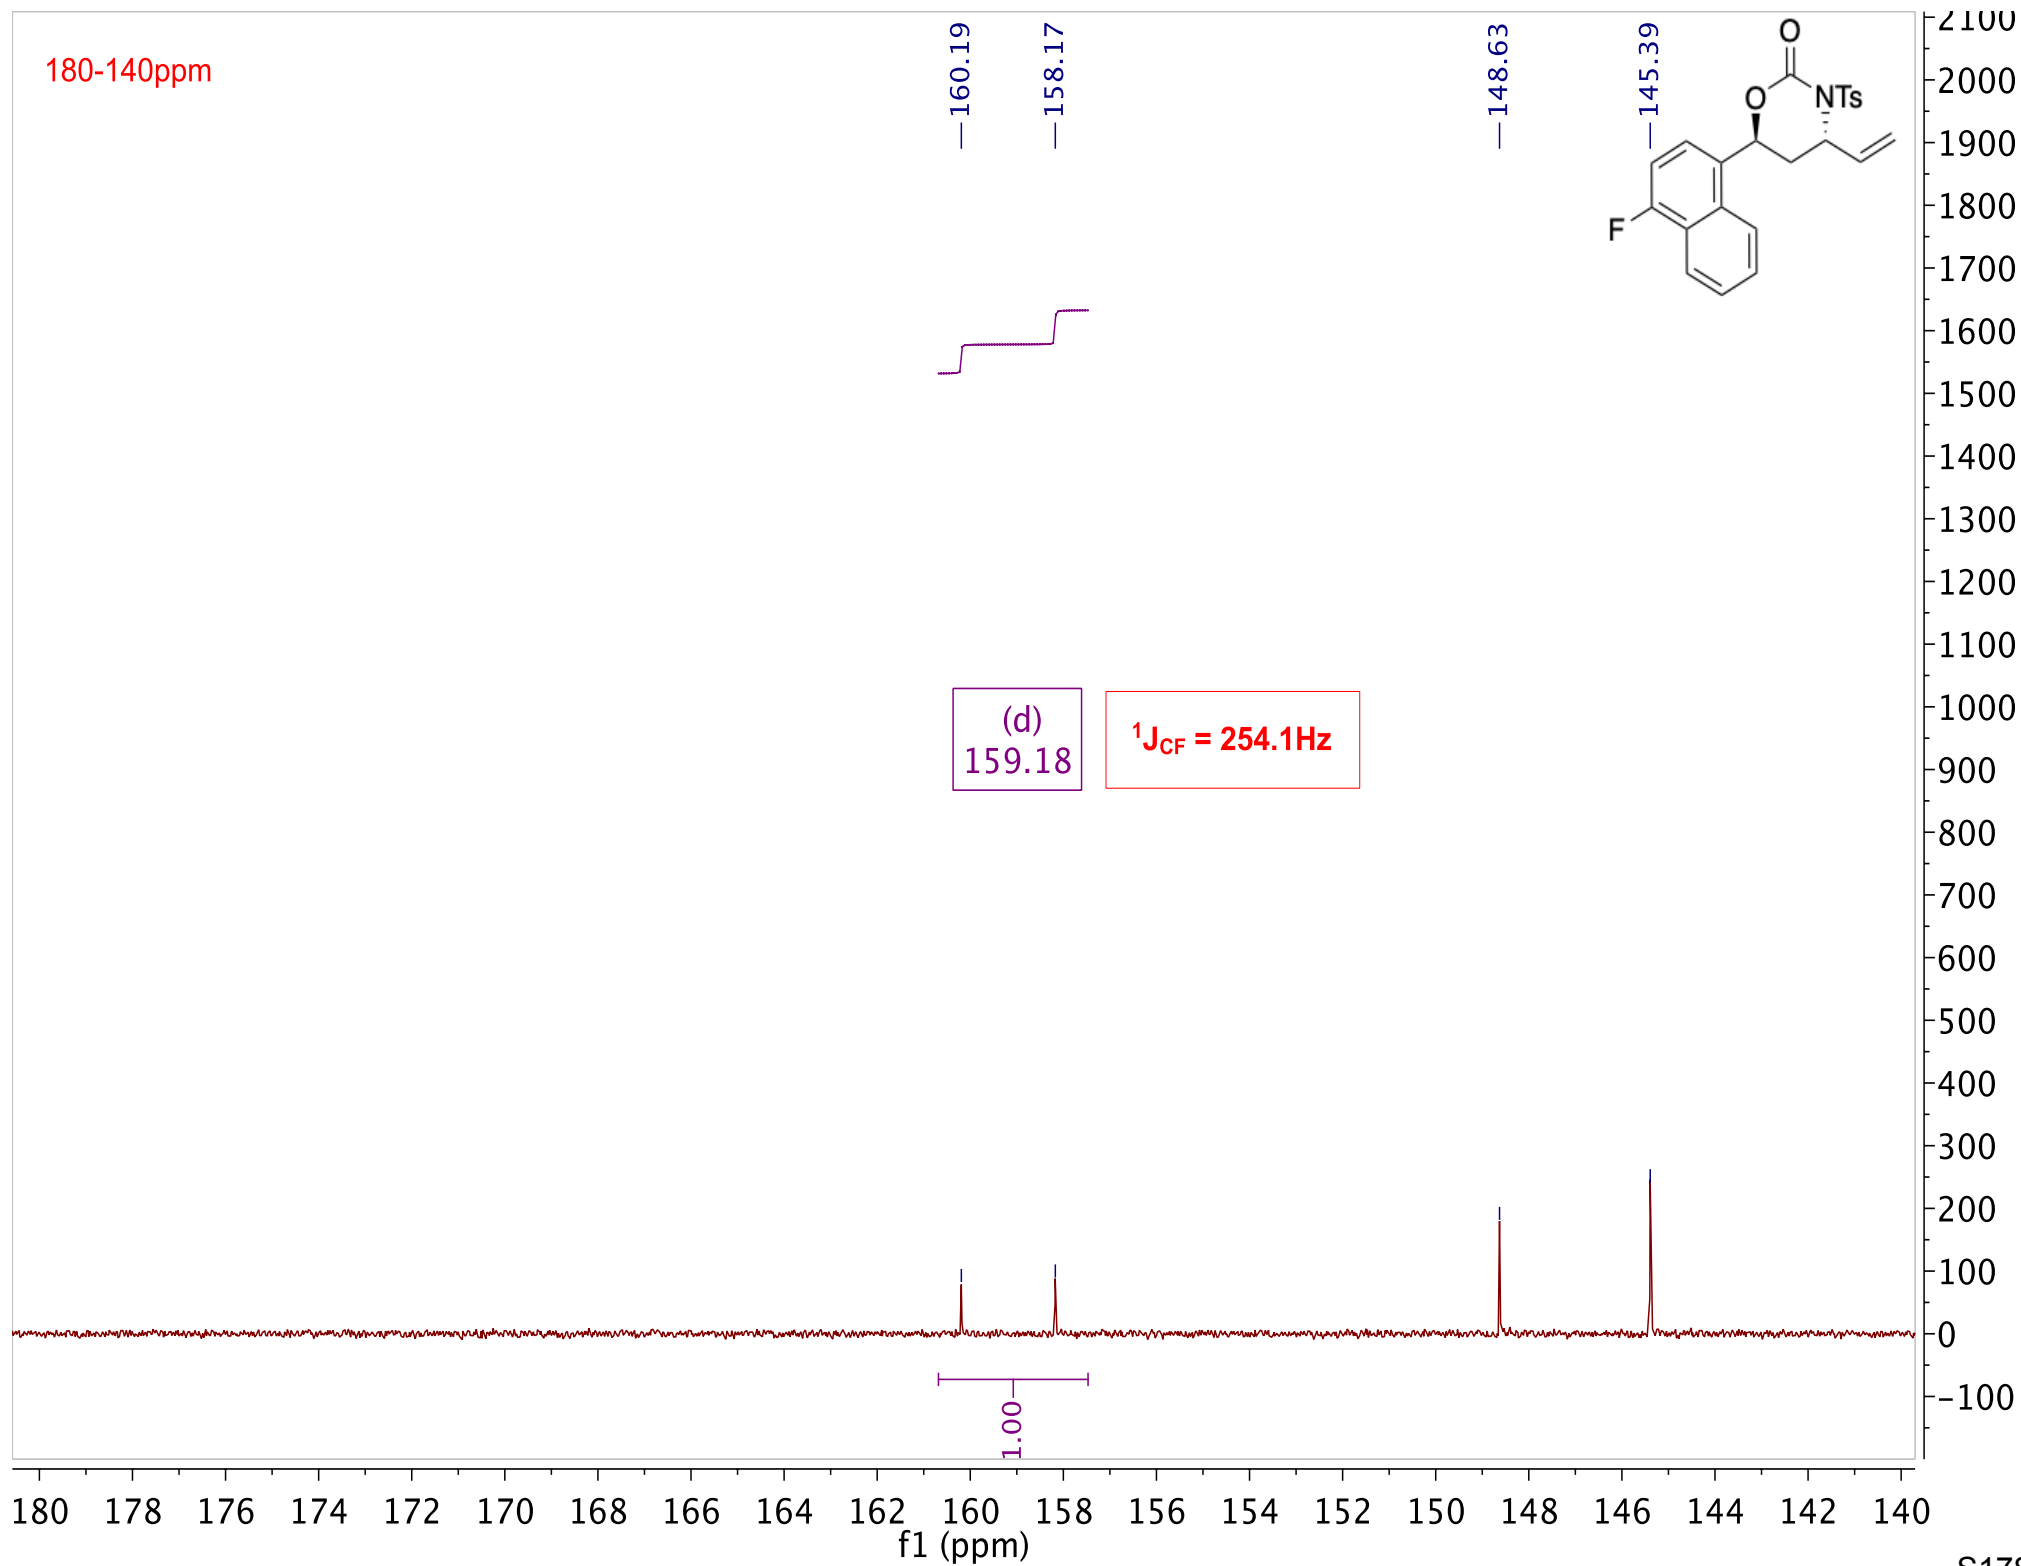

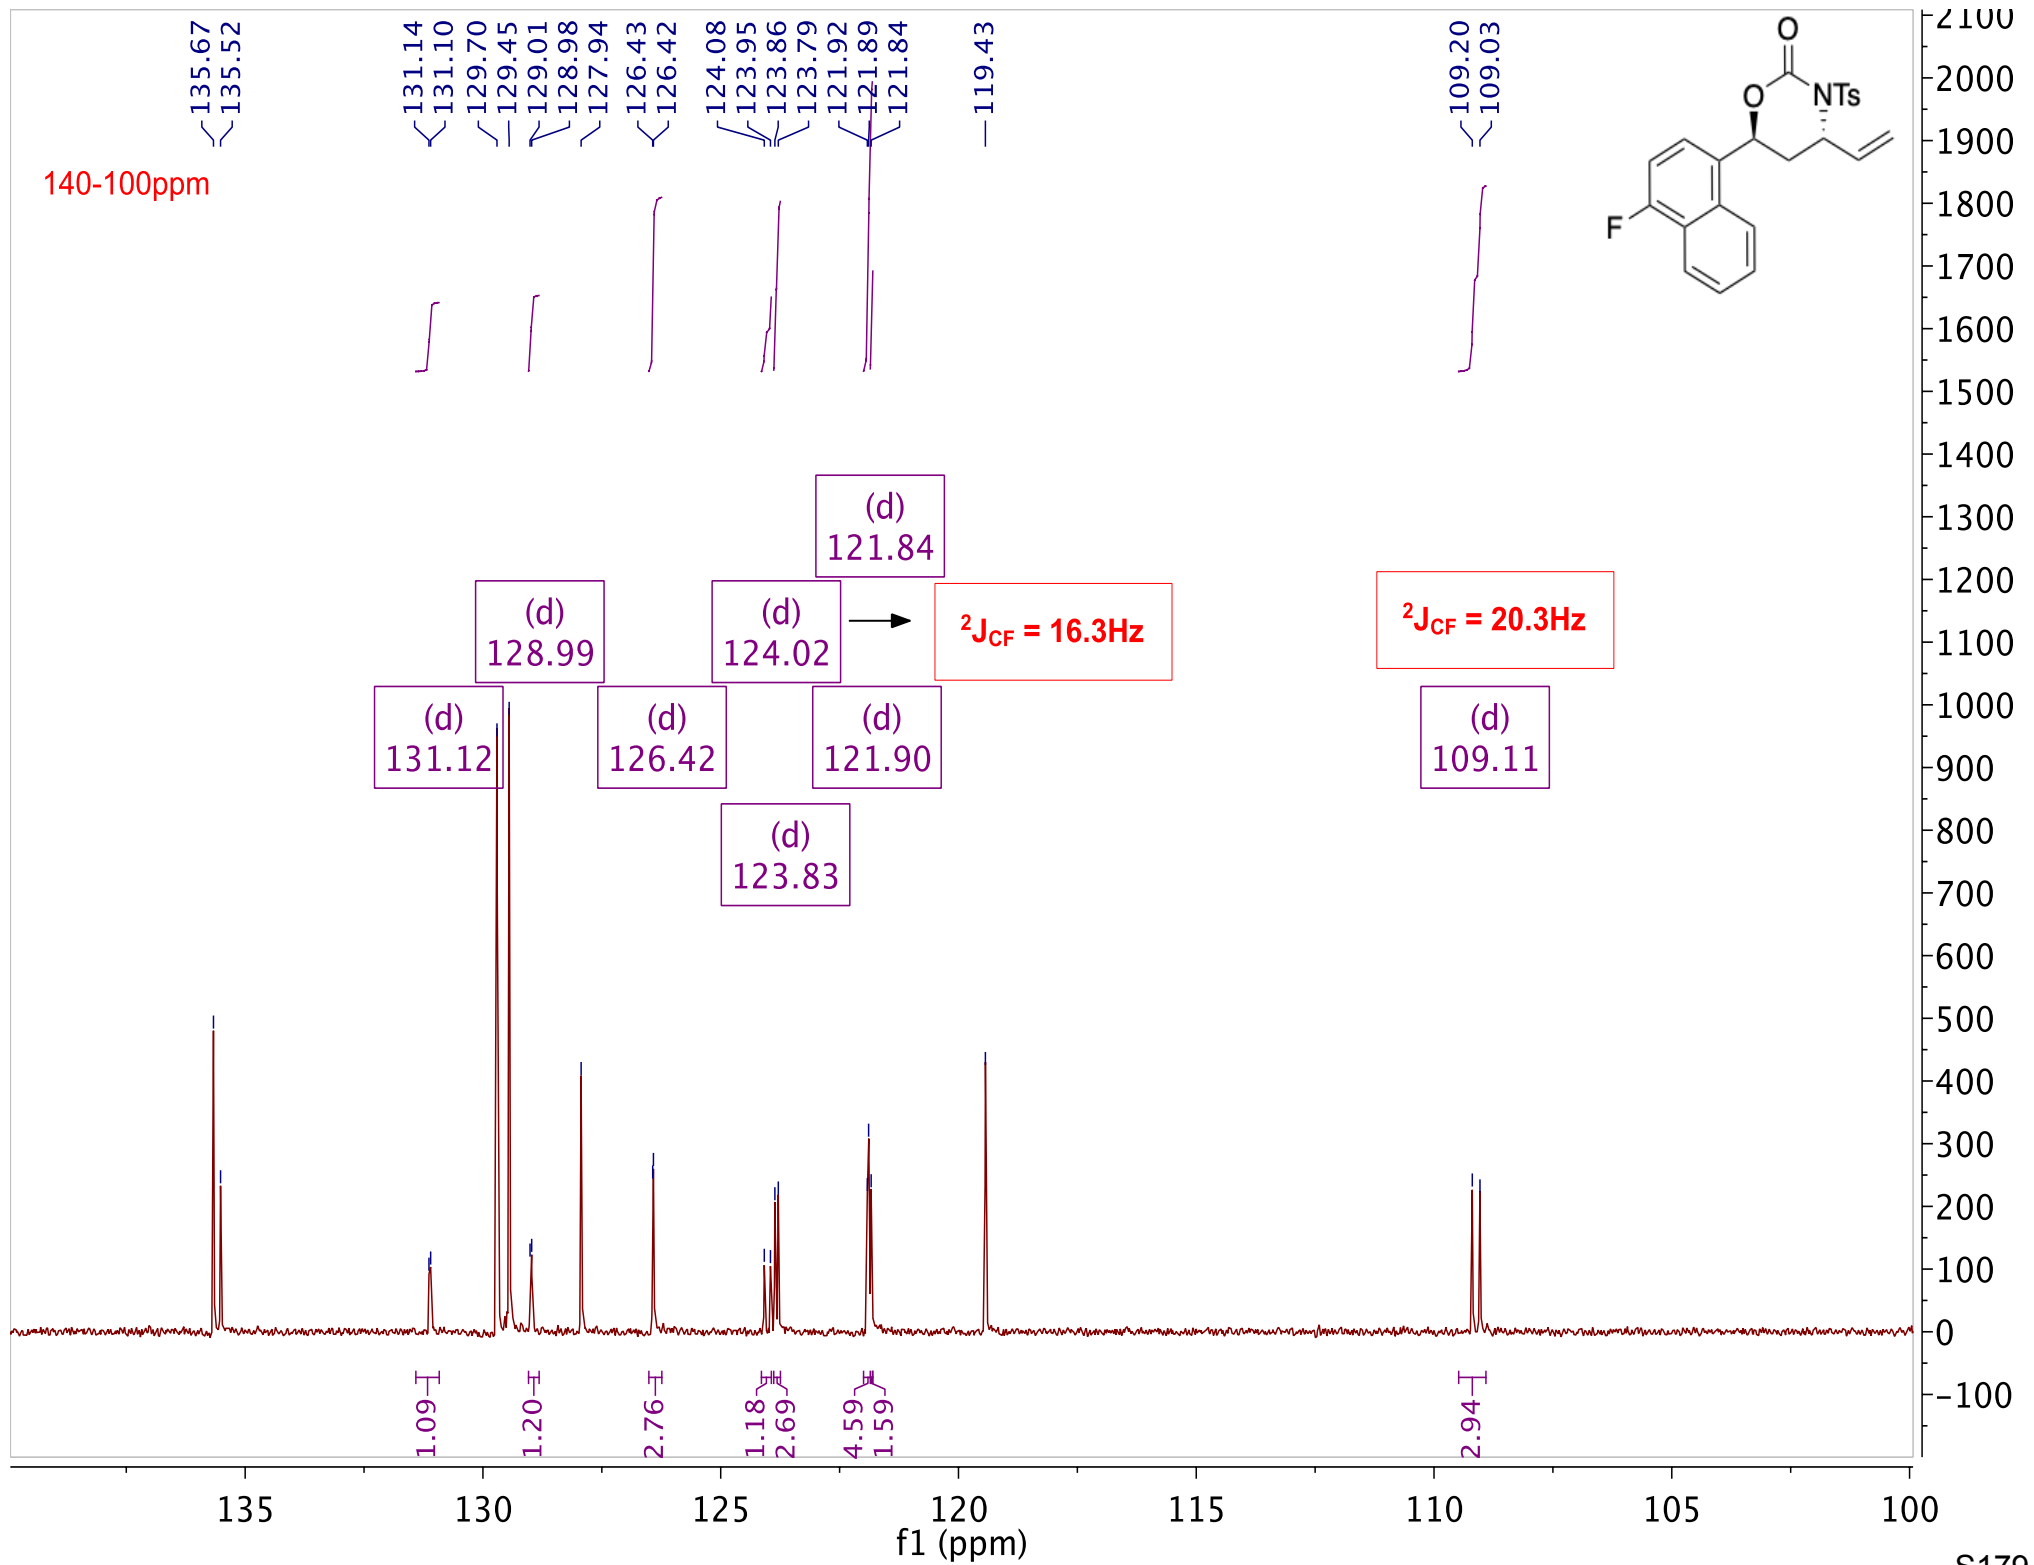





150-100ppm

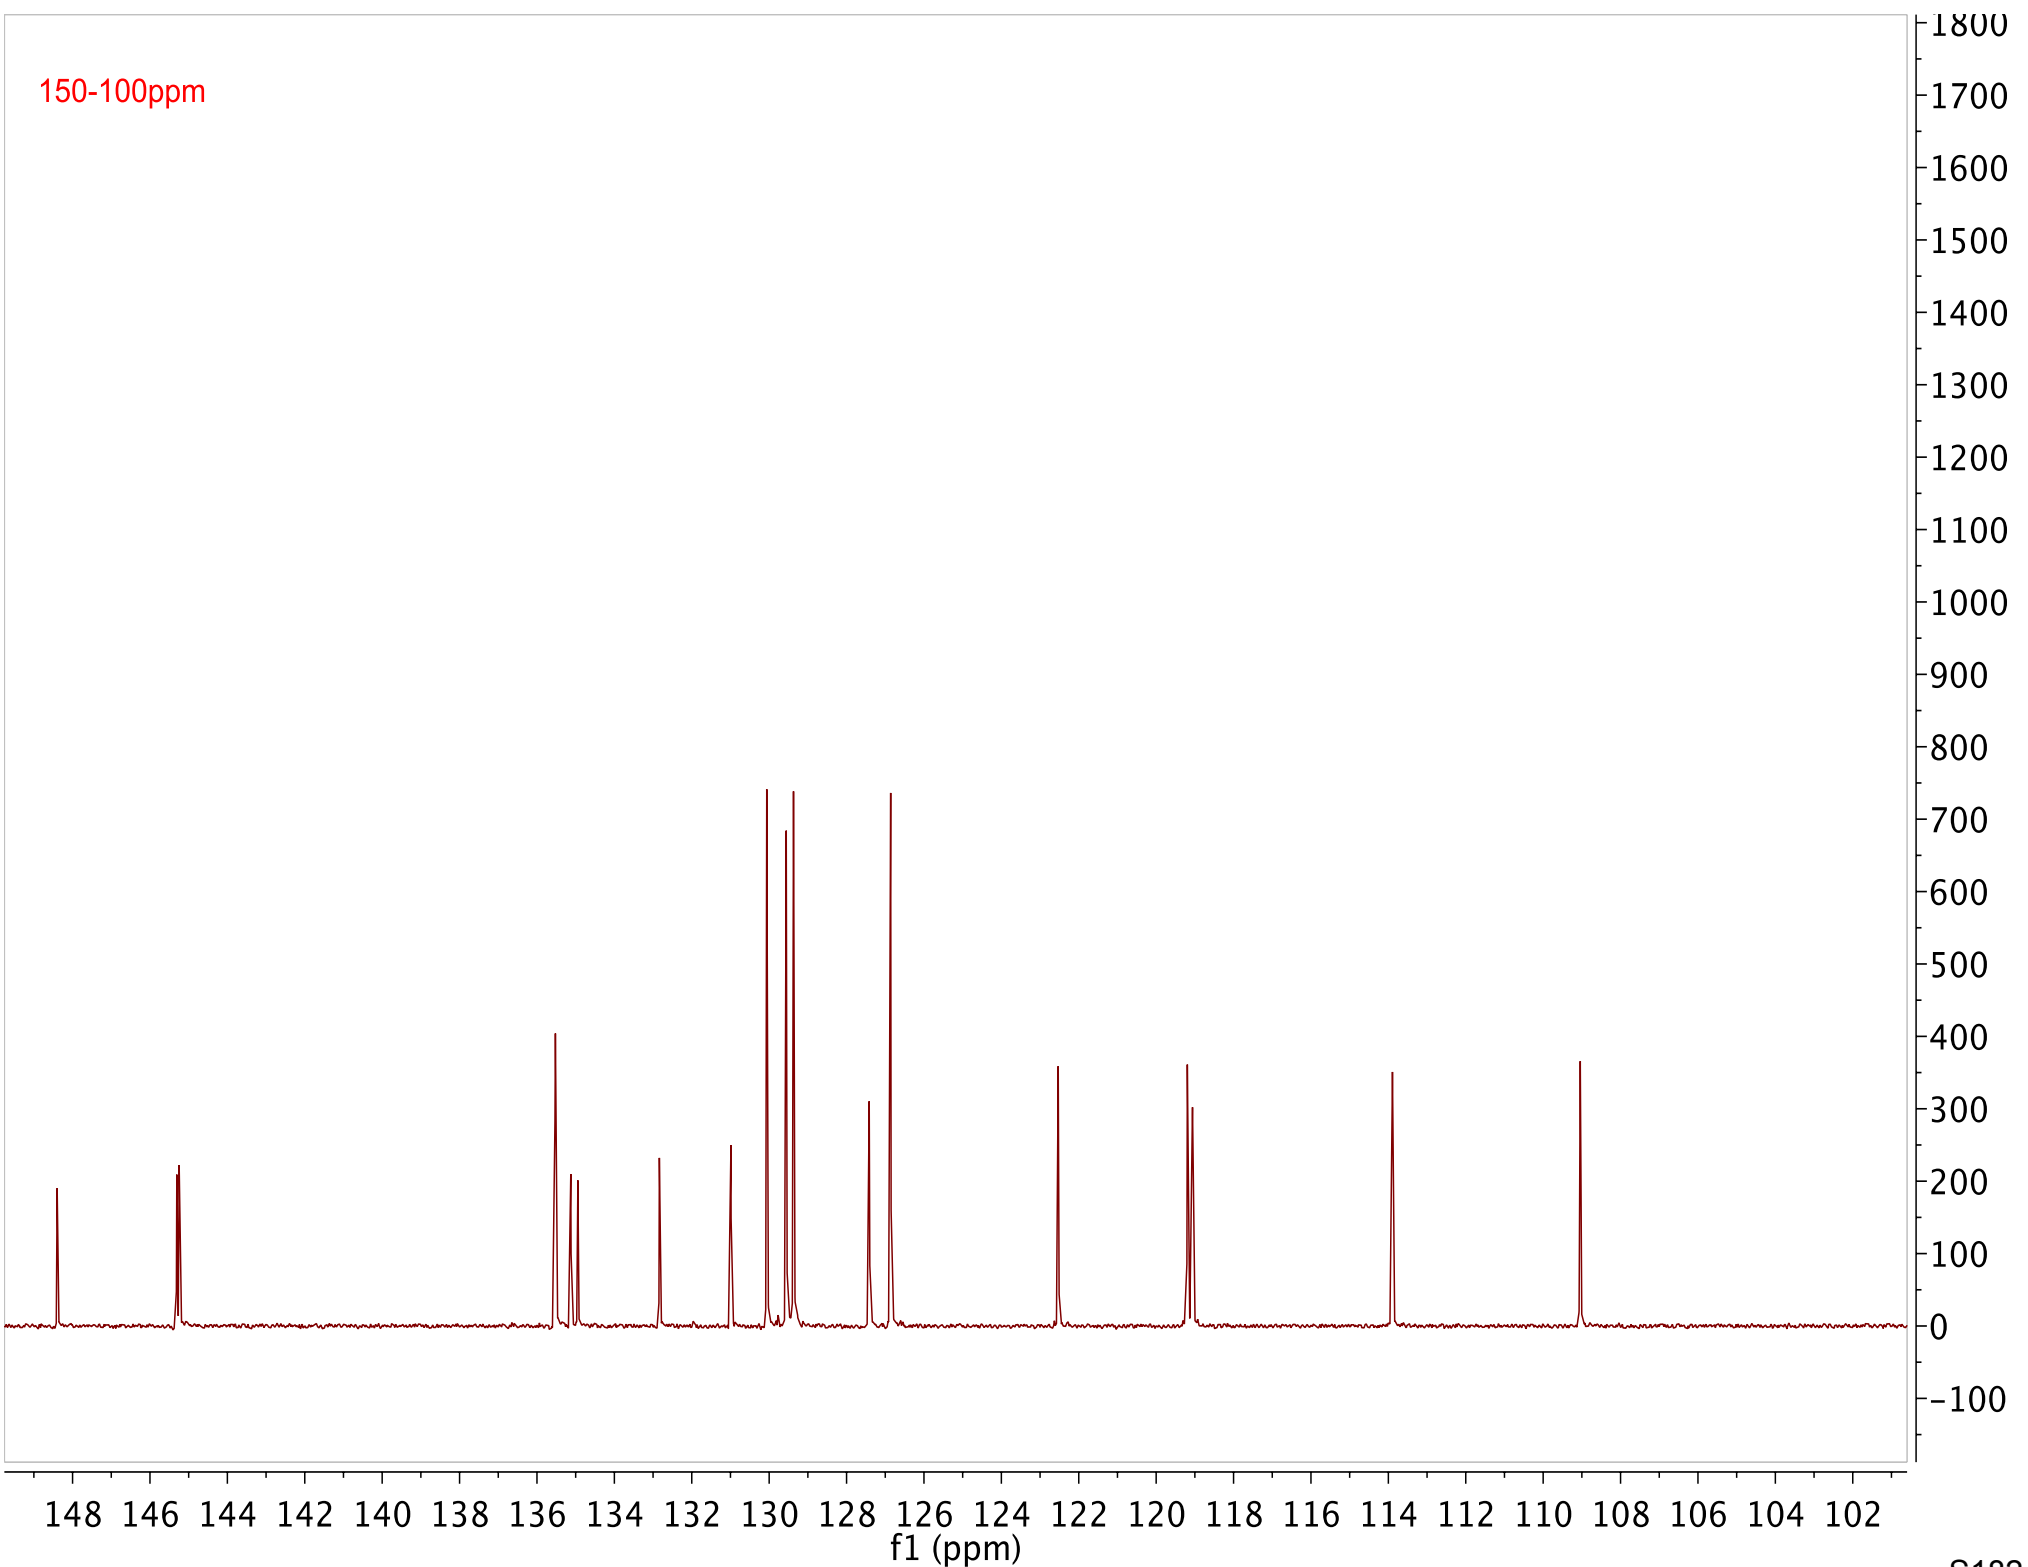



| Parameter                 | Value               |
|---------------------------|---------------------|
| 1 Origin                  | Bruker BioSpin GmbH |
| 2 Instrument              | spect               |
| 3 Solvent                 | CDCl3               |
| 4 Temperature             | 288.9               |
| 5 Pulse Sequence          | zg30                |
| 6 Experiment              | 1D                  |
| 7 Number of Scans         | 16                  |
| 8 Receiver Gain           | 69.2                |
| 9 Relaxation Delay        | 15.0000             |
| 10 Pulse Width            | 12.0000             |
| 11 Spectrometer Frequency | 500.35              |
| 12 Spectral Width         | 10000.0             |
| 13 Lowest Frequency       | -1921.3             |
| 14 Nucleus                | 1H                  |
| 15 Acquired Size          | 32768               |
| 16 Spectral Size          | 65536               |

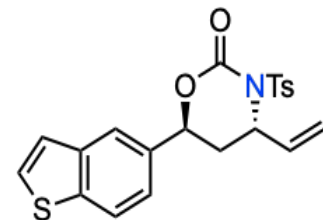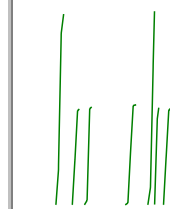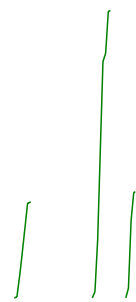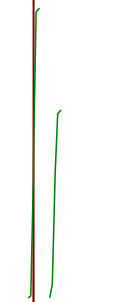

1.99  
1.00  
1.02  
1.05  
2.02  
1.02  
1.01

1.00  
3.00  
1.11

3.02  
1.96

H<sub>2</sub>O  
grease

11.0 10.0 9.0 8.0 7.0 6.0 5.0 4.0 3.0 2.0 1.0 0.0 -1.0

f1 (ppm)

| Parameter                 | Value               |
|---------------------------|---------------------|
| 1 Origin                  | Bruker BioSpin GmbH |
| 2 Instrument              | spect               |
| 3 Solvent                 | CDCl3               |
| 4 Temperature             | 289.0               |
| 5 Pulse Sequence          | zgpg30              |
| 6 Experiment              | 1D                  |
| 7 Number of Scans         | 256                 |
| 8 Receiver Gain           | 190.5               |
| 9 Relaxation Delay        | 2.0000              |
| 10 Pulse Width            | 10.0000             |
| 11 Spectrometer Frequency | 125.83              |
| 12 Spectral Width         | 31512.6             |
| 13 Lowest Frequency       | -1905.0             |
| 14 Nucleus                | 13C                 |
| 15 Acquired Size          | 32768               |
| 16 Spectral Size          | 65536               |

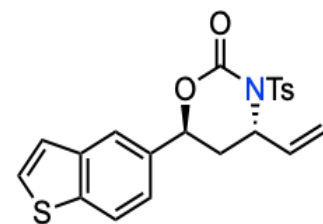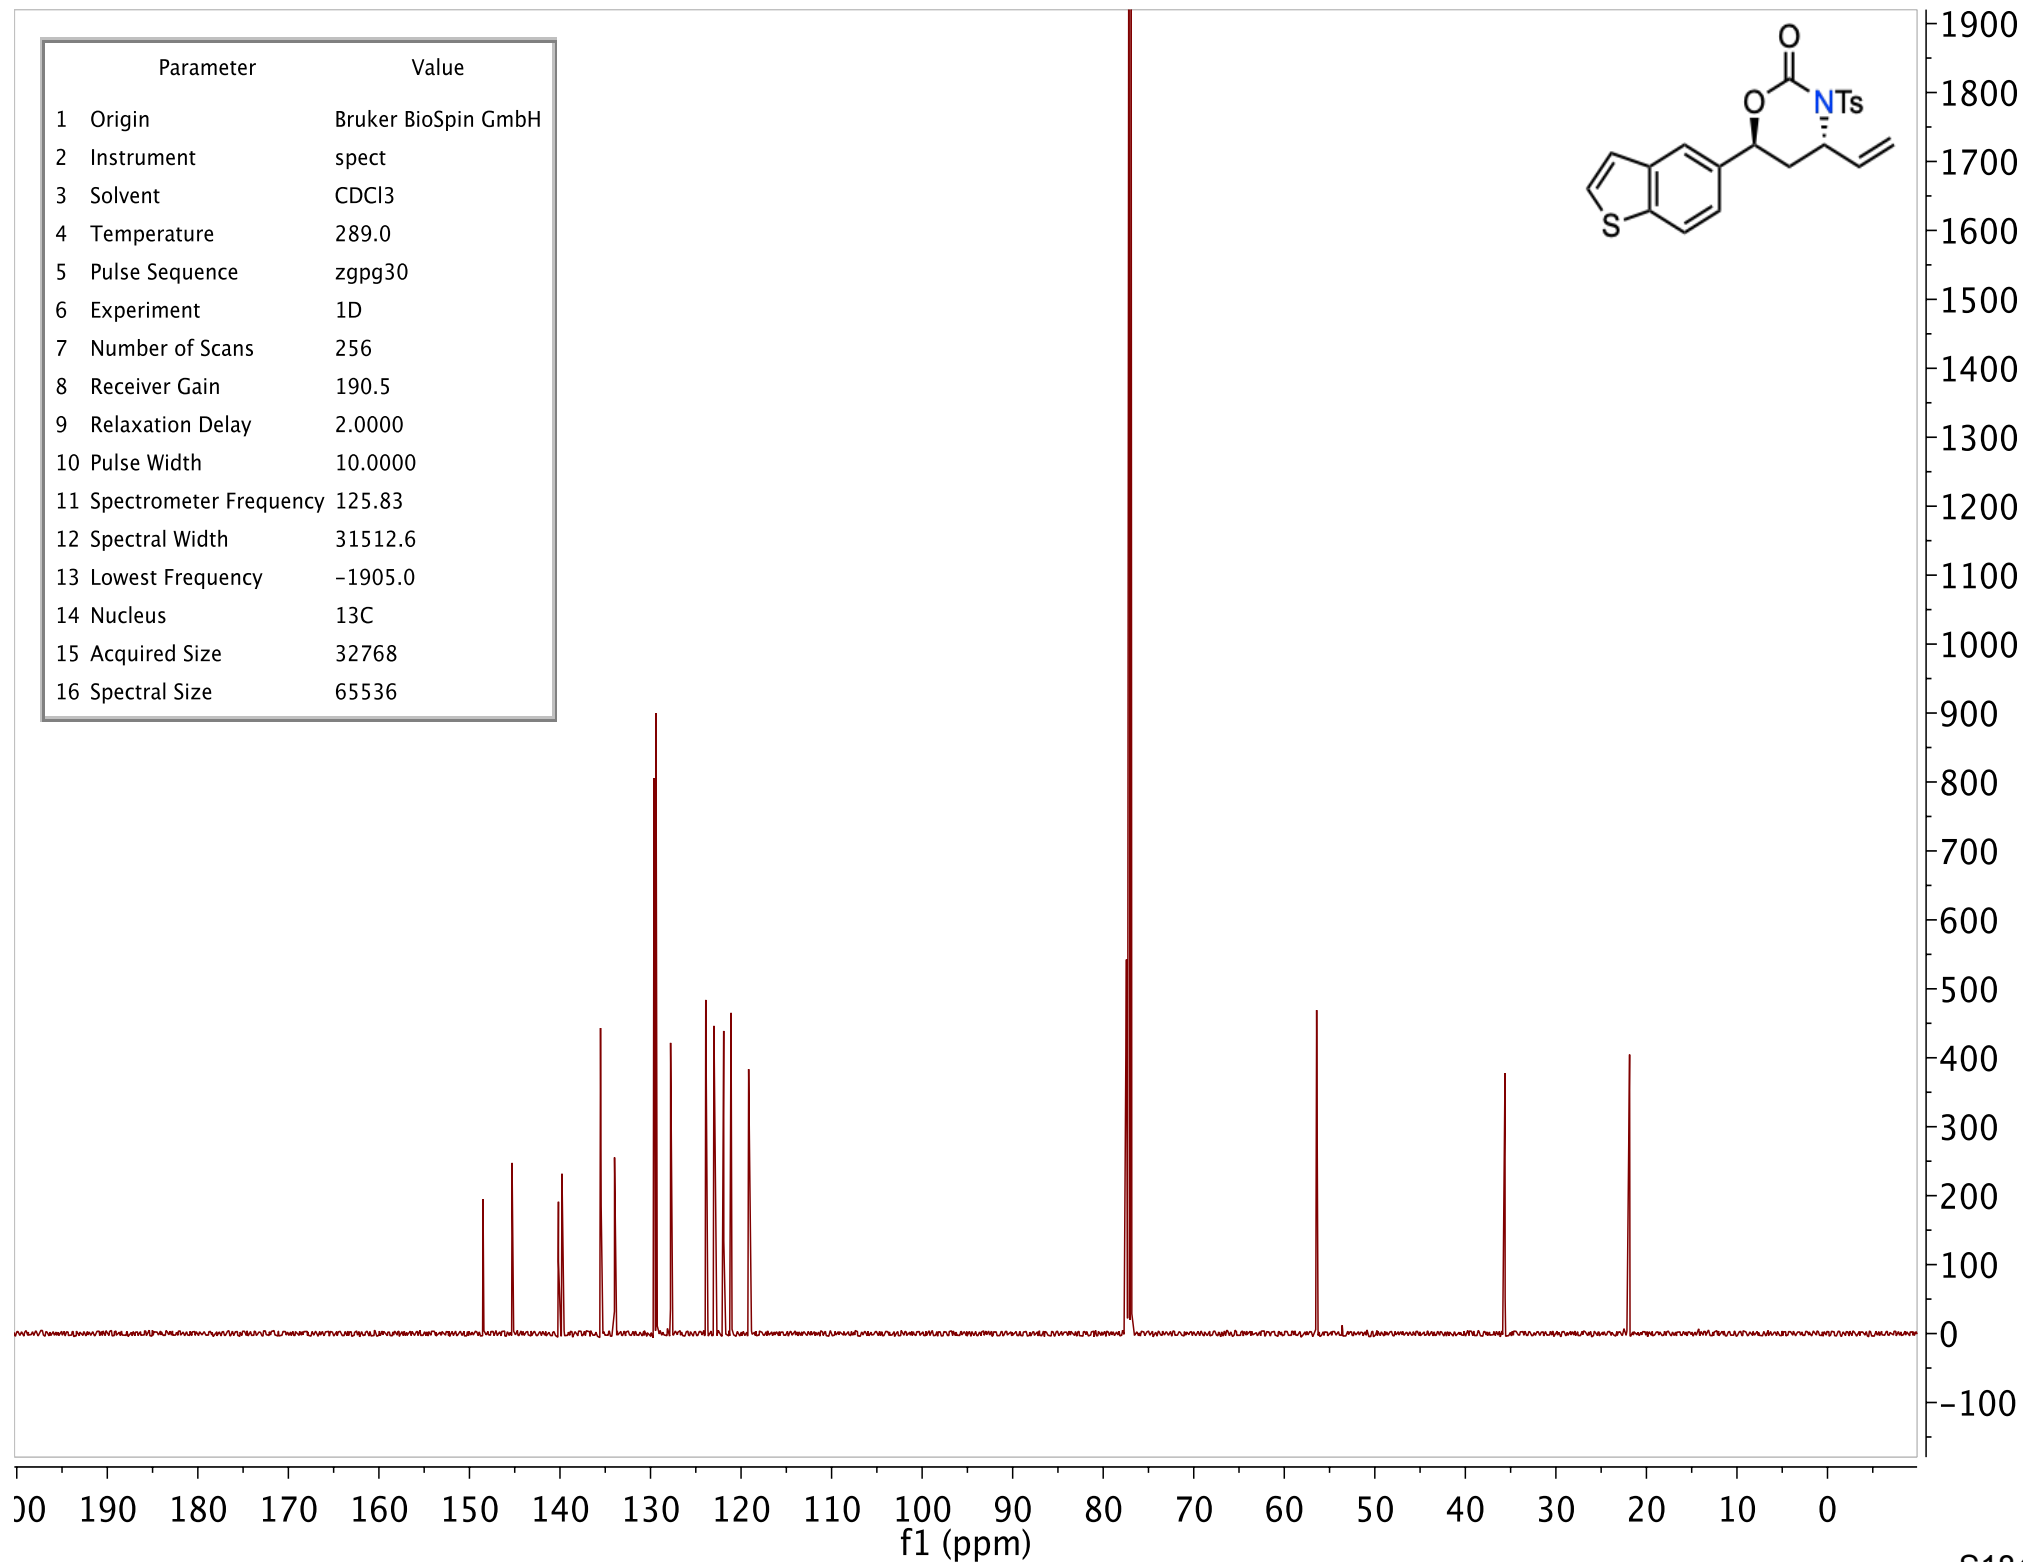

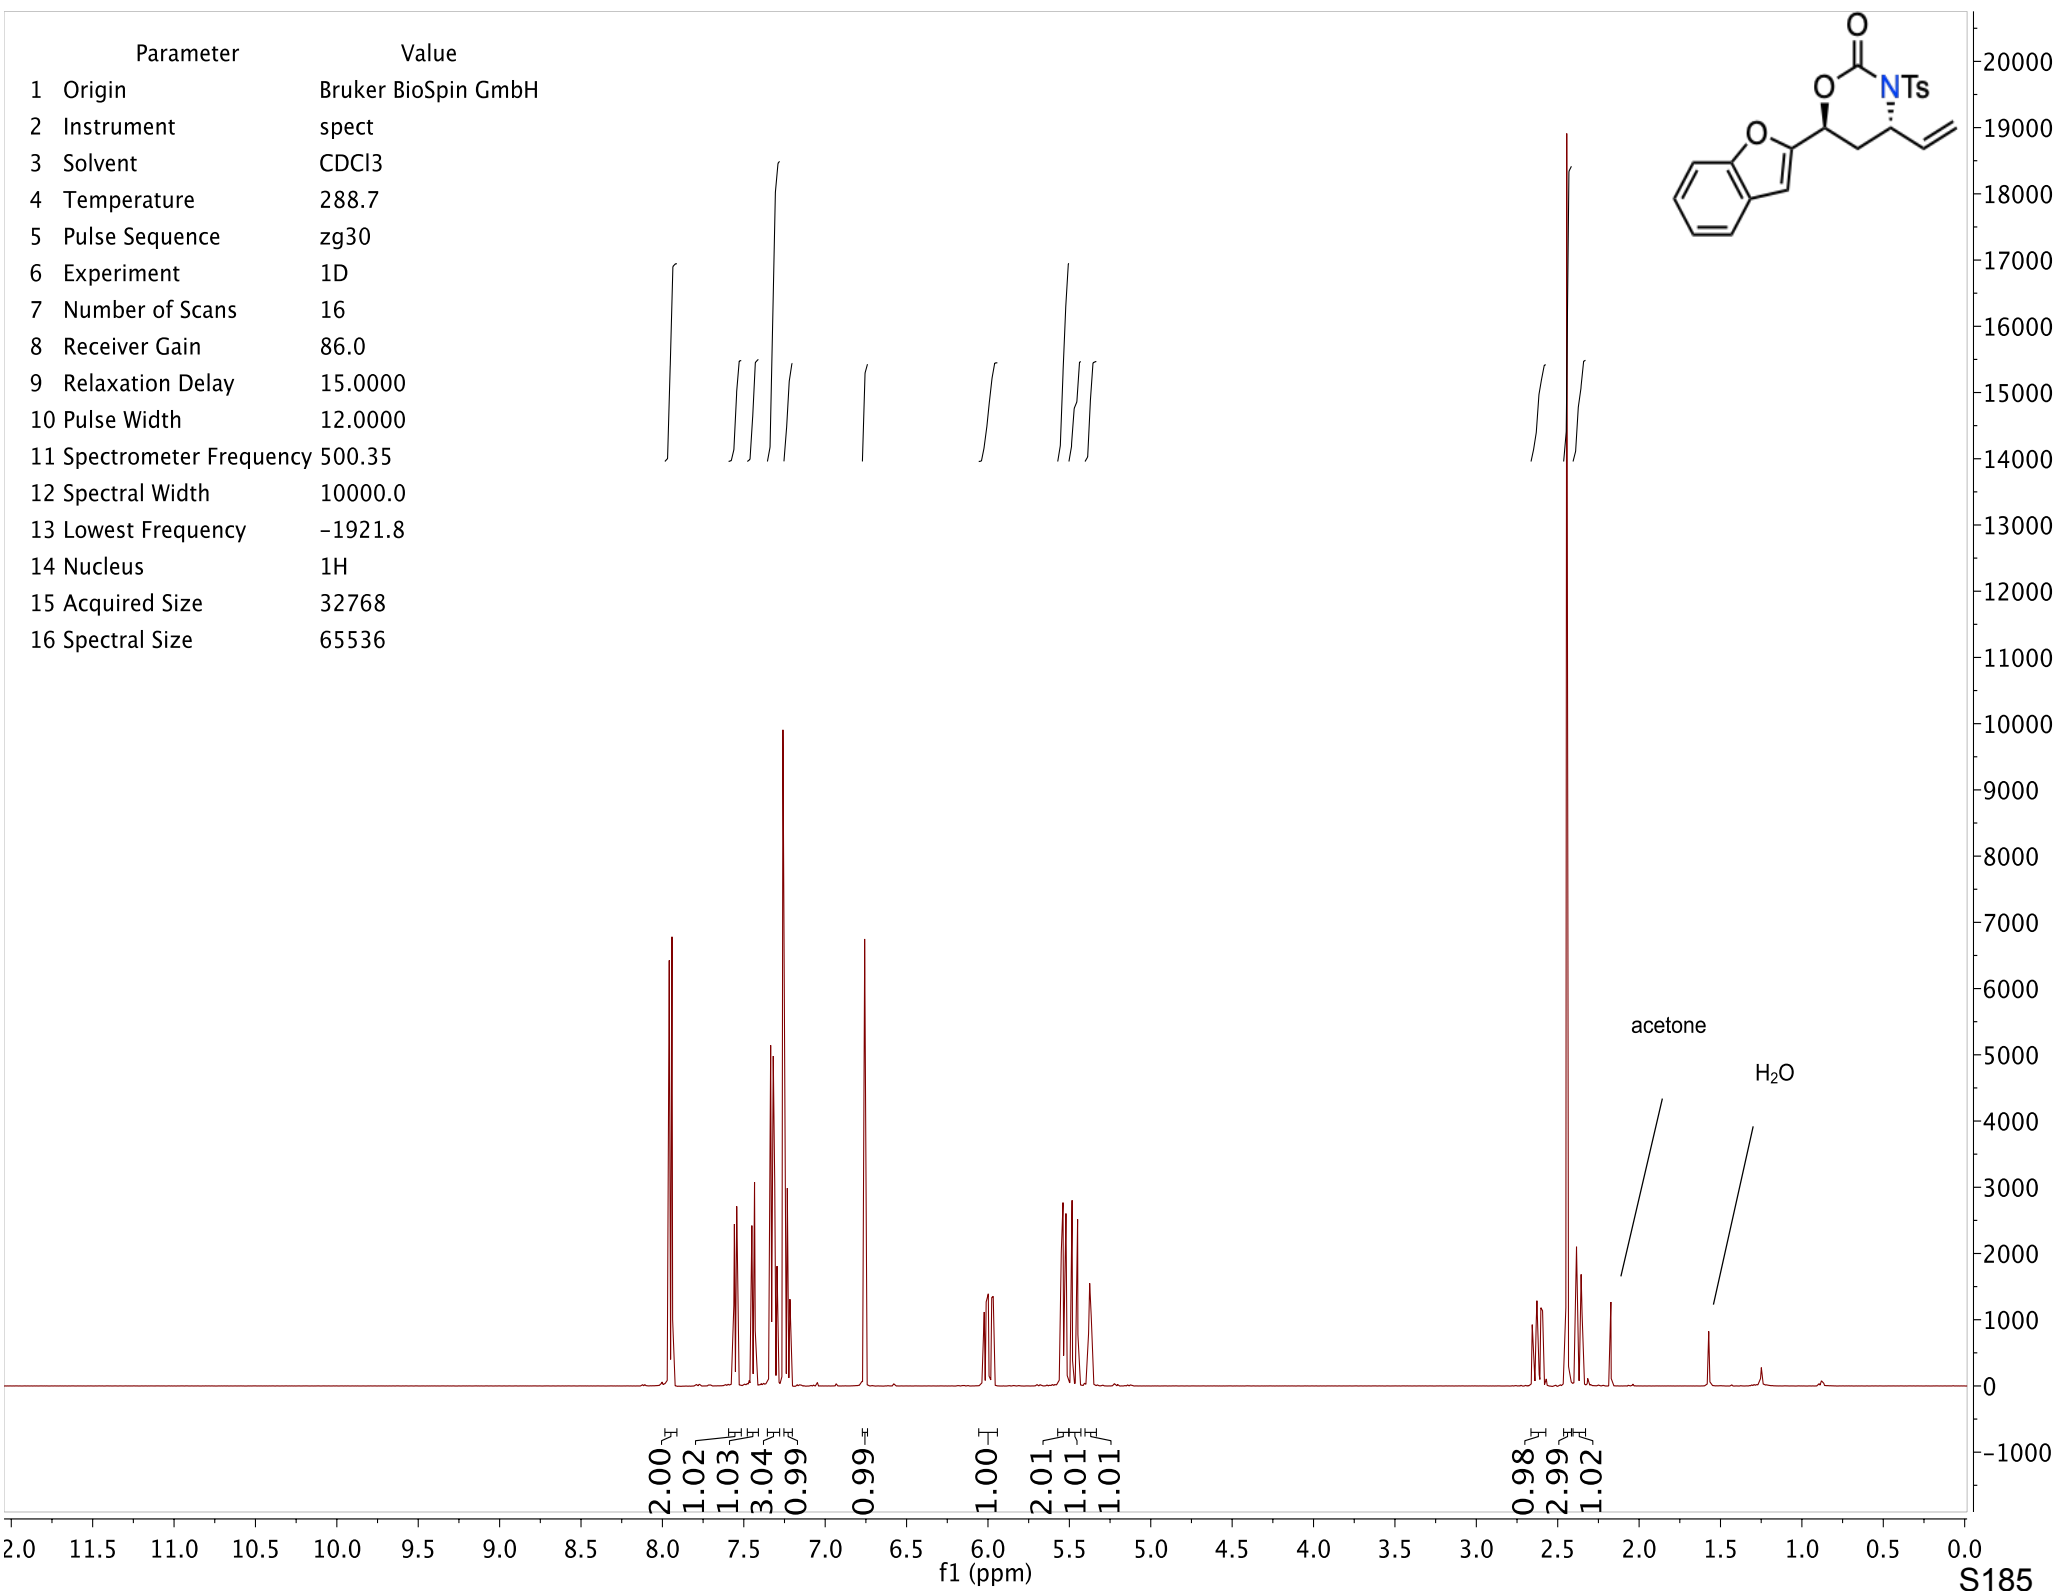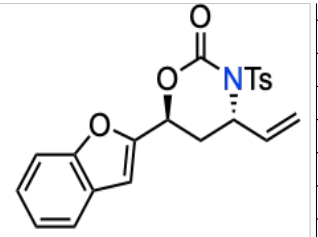

| Parameter                 | Value               |
|---------------------------|---------------------|
| 1 Origin                  | Bruker BioSpin GmbH |
| 2 Instrument              | spect               |
| 3 Solvent                 | CDCl3               |
| 4 Temperature             | 288.7               |
| 5 Pulse Sequence          | zgpg30              |
| 6 Experiment              | 1D                  |
| 7 Number of Scans         | 256                 |
| 8 Receiver Gain           | 190.5               |
| 9 Relaxation Delay        | 2.0000              |
| 10 Pulse Width            | 10.0000             |
| 11 Spectrometer Frequency | 125.83              |
| 12 Spectral Width         | 31512.6             |
| 13 Lowest Frequency       | -1916.9             |
| 14 Nucleus                | 13C                 |
| 15 Acquired Size          | 32768               |
| 16 Spectral Size          | 65536               |

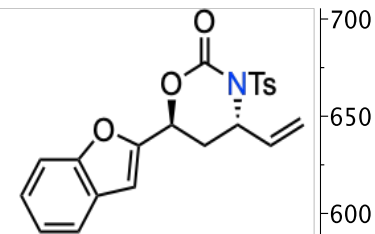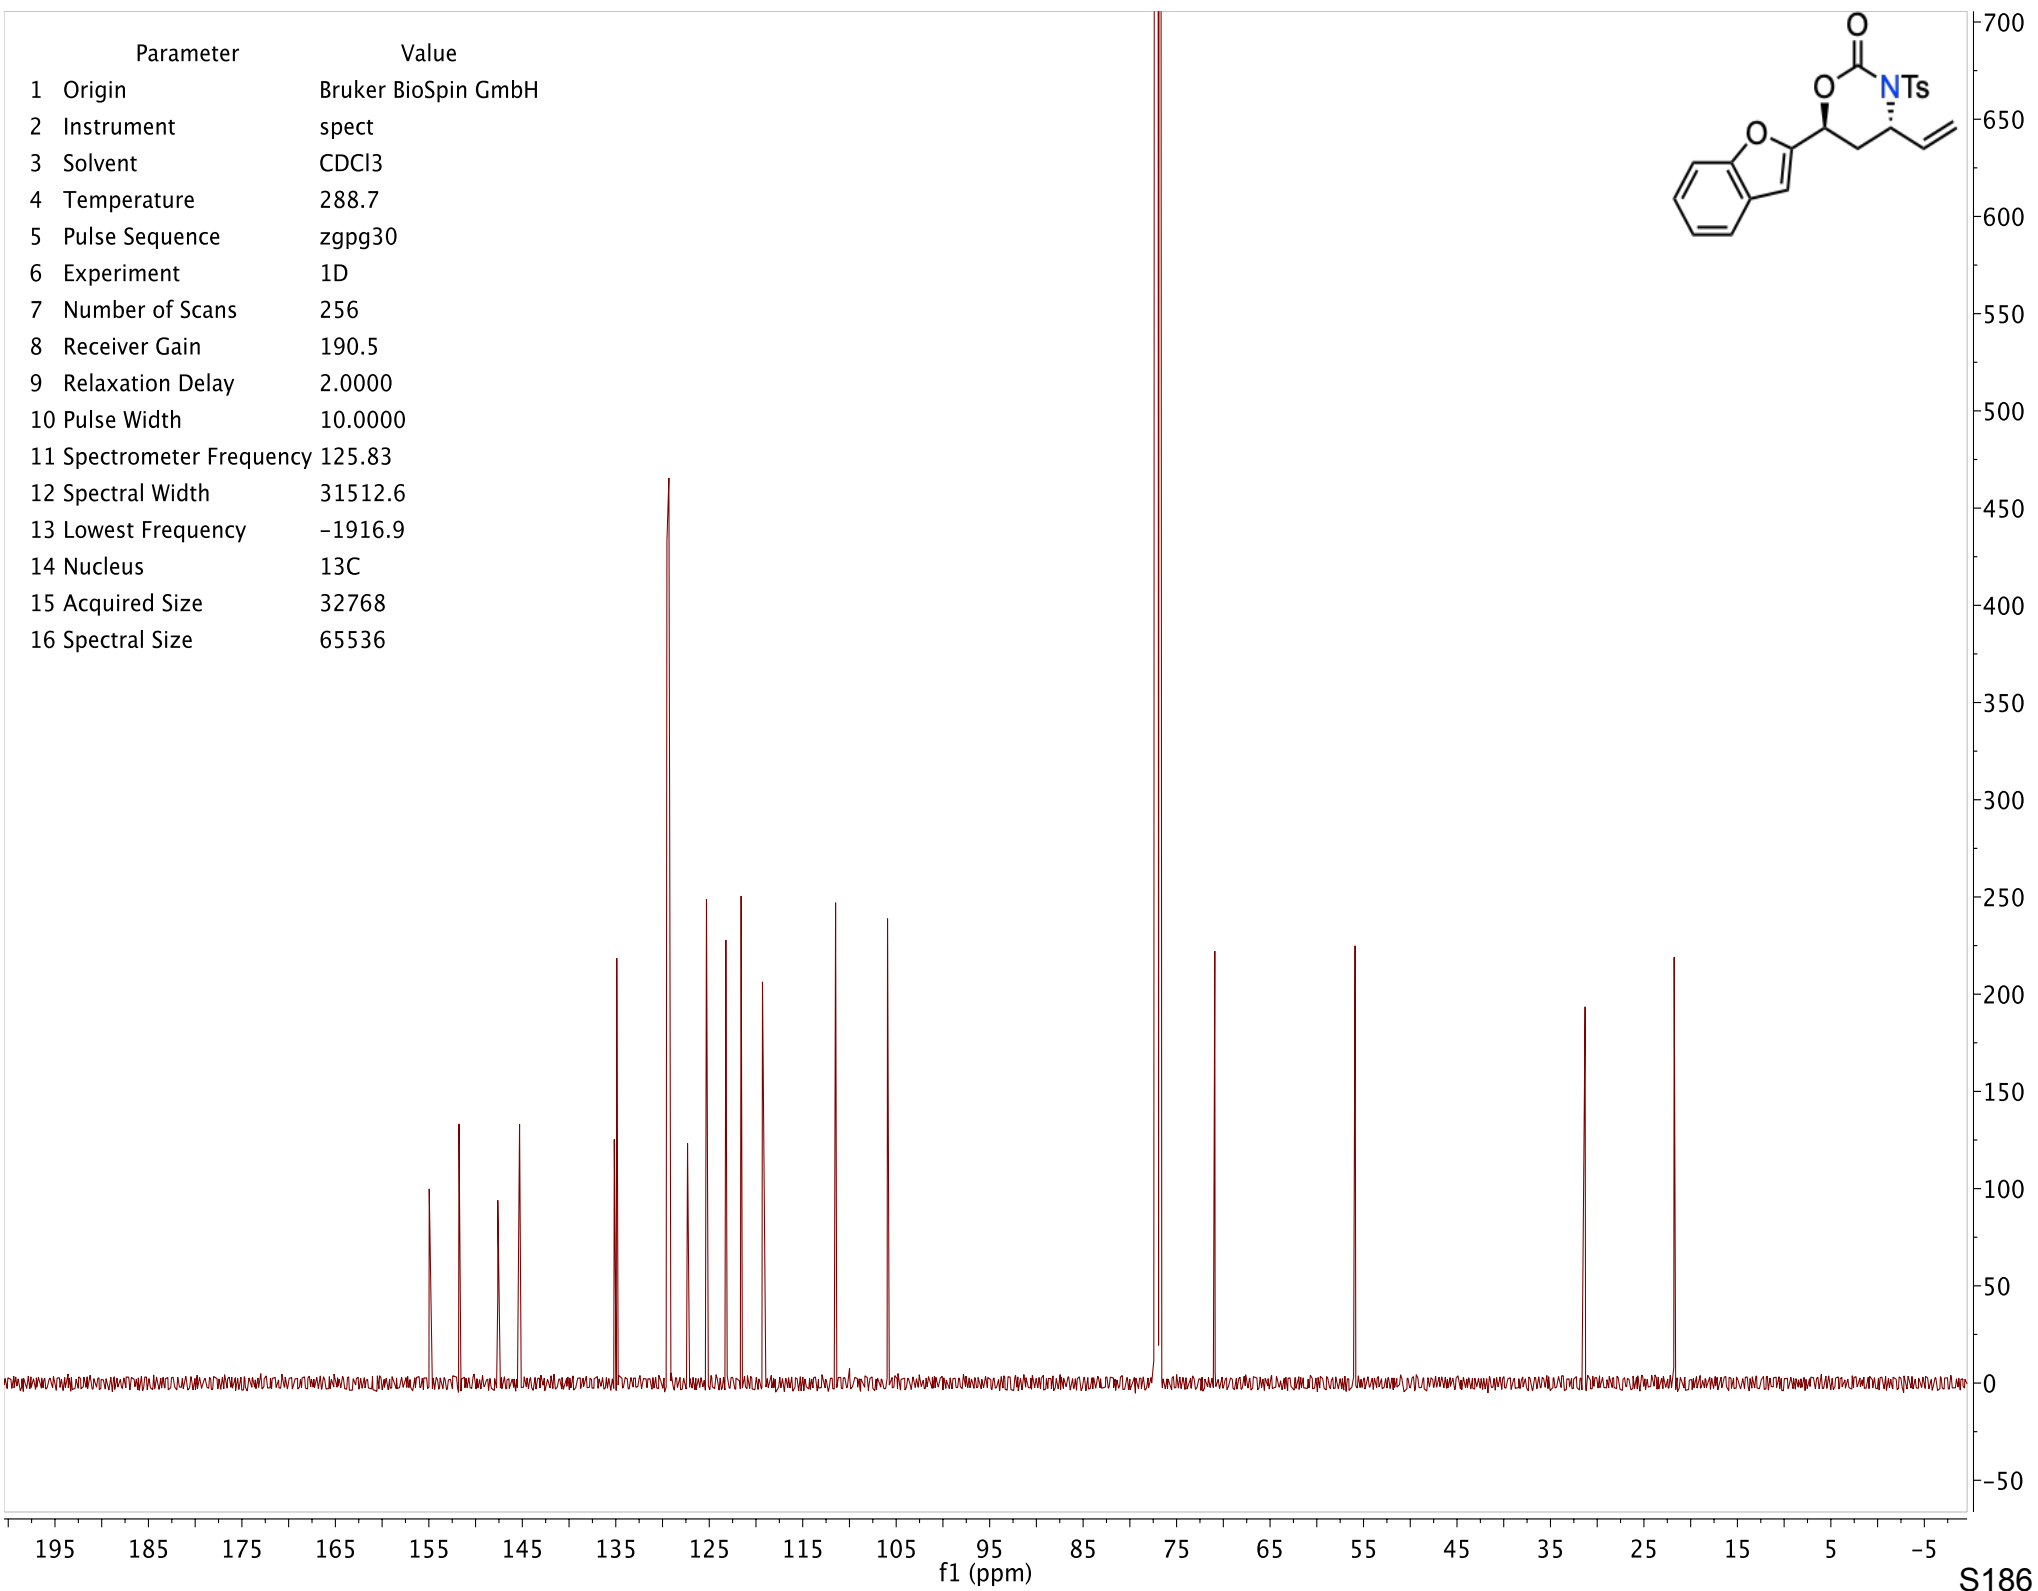

| Parameters |                        |                     |
|------------|------------------------|---------------------|
| Parameter  |                        | Value               |
| 1          | Origin                 | Bruker BioSpin GmbH |
| 2          | Instrument             | spect               |
| 3          | Solvent                | CDCl3               |
| 4          | Temperature            | 298.1               |
| 5          | Pulse Sequence         | zg30                |
| 6          | Experiment             | 1D                  |
| 7          | Number of Scans        | 5                   |
| 8          | Receiver Gain          | 122.8               |
| 9          | Relaxation Delay       | 15.0000             |
| 10         | Pulse Width            | 12.0000             |
| 11         | Spectrometer Frequency | 500.35              |
| 12         | Spectral Width         | 10000.0             |
| 13         | Lowest Frequency       | -1919.8             |
| 14         | Nucleus                | <sup>1</sup> H      |
| 15         | Acquired Size          | 32768               |
| 16         | Spectral Size          | 65536               |

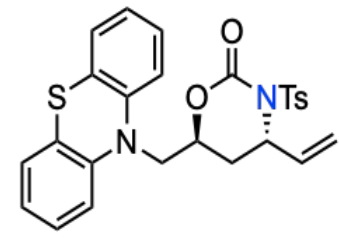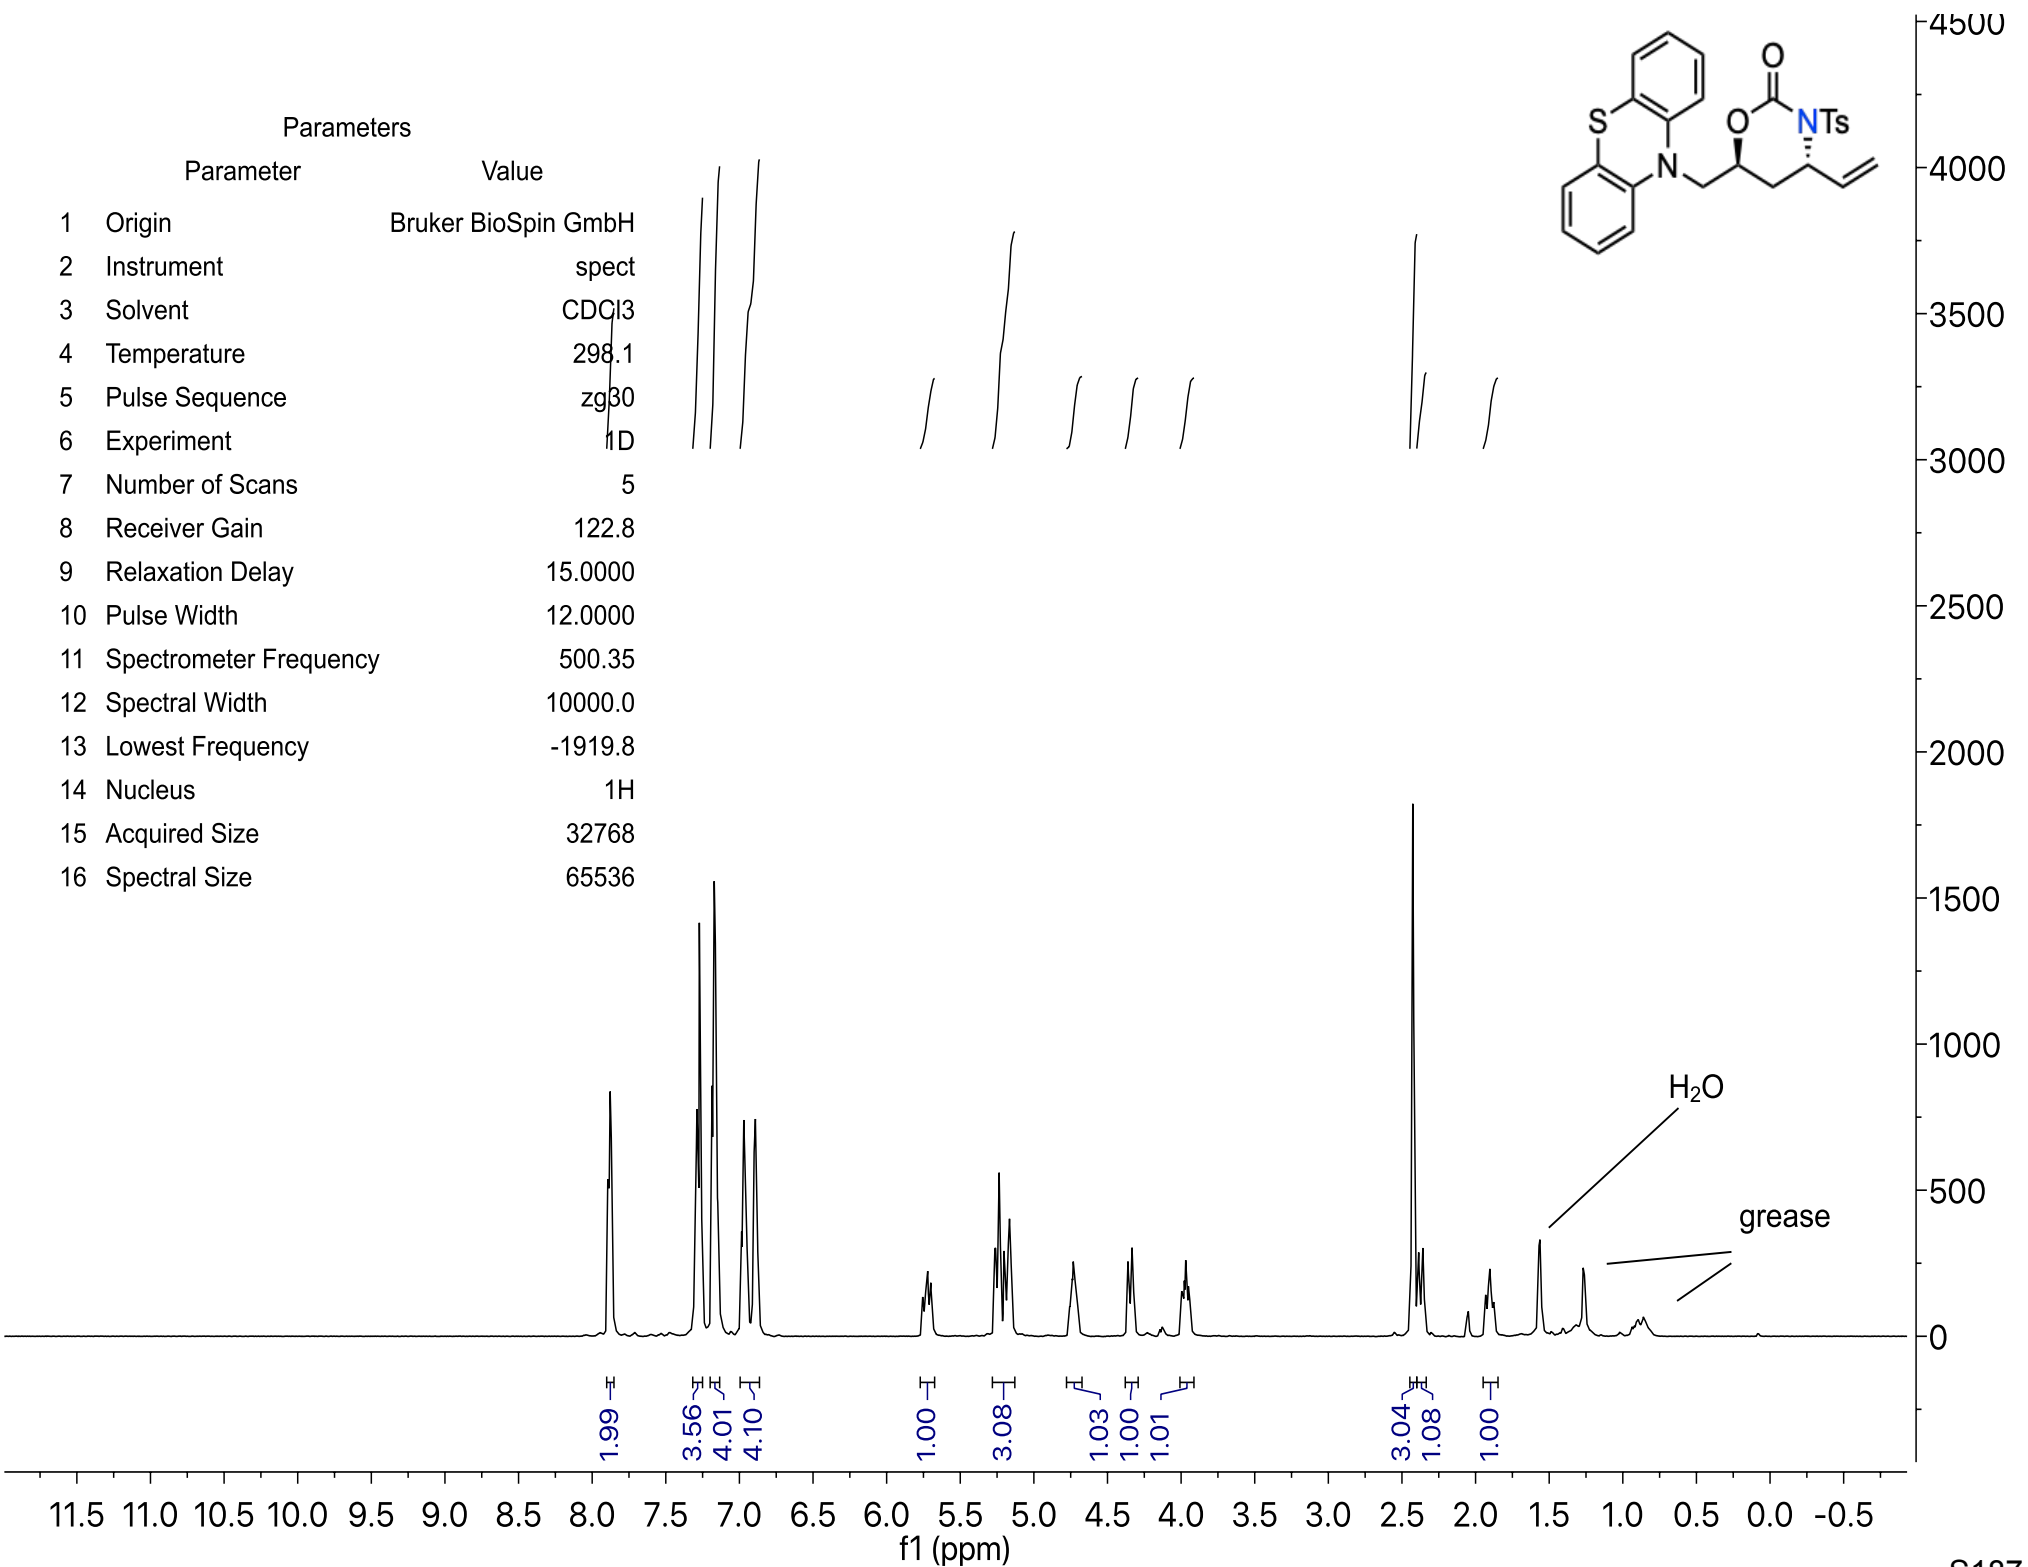

Parameters

| Parameter                 | Value               |
|---------------------------|---------------------|
| 1 Origin                  | Bruker BioSpin GmbH |
| 2 Instrument              | spect               |
| 3 Solvent                 | CDCl3               |
| 4 Temperature             | 298.2               |
| 5 Pulse Sequence          | zgpg30              |
| 6 Experiment              | 1D                  |
| 7 Number of Scans         | 512                 |
| 8 Receiver Gain           | 190.5               |
| 9 Relaxation Delay        | 1.0000              |
| 10 Pulse Width            | 10.0000             |
| 11 Spectrometer Frequency | 125.83              |
| 12 Spectral Width         | 31512.6             |
| 13 Lowest Frequency       | -1899.4             |
| 14 Nucleus                | <sup>13</sup> C     |
| 15 Acquired Size          | 32768               |
| 16 Spectral Size          | 65536               |

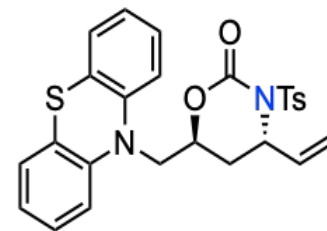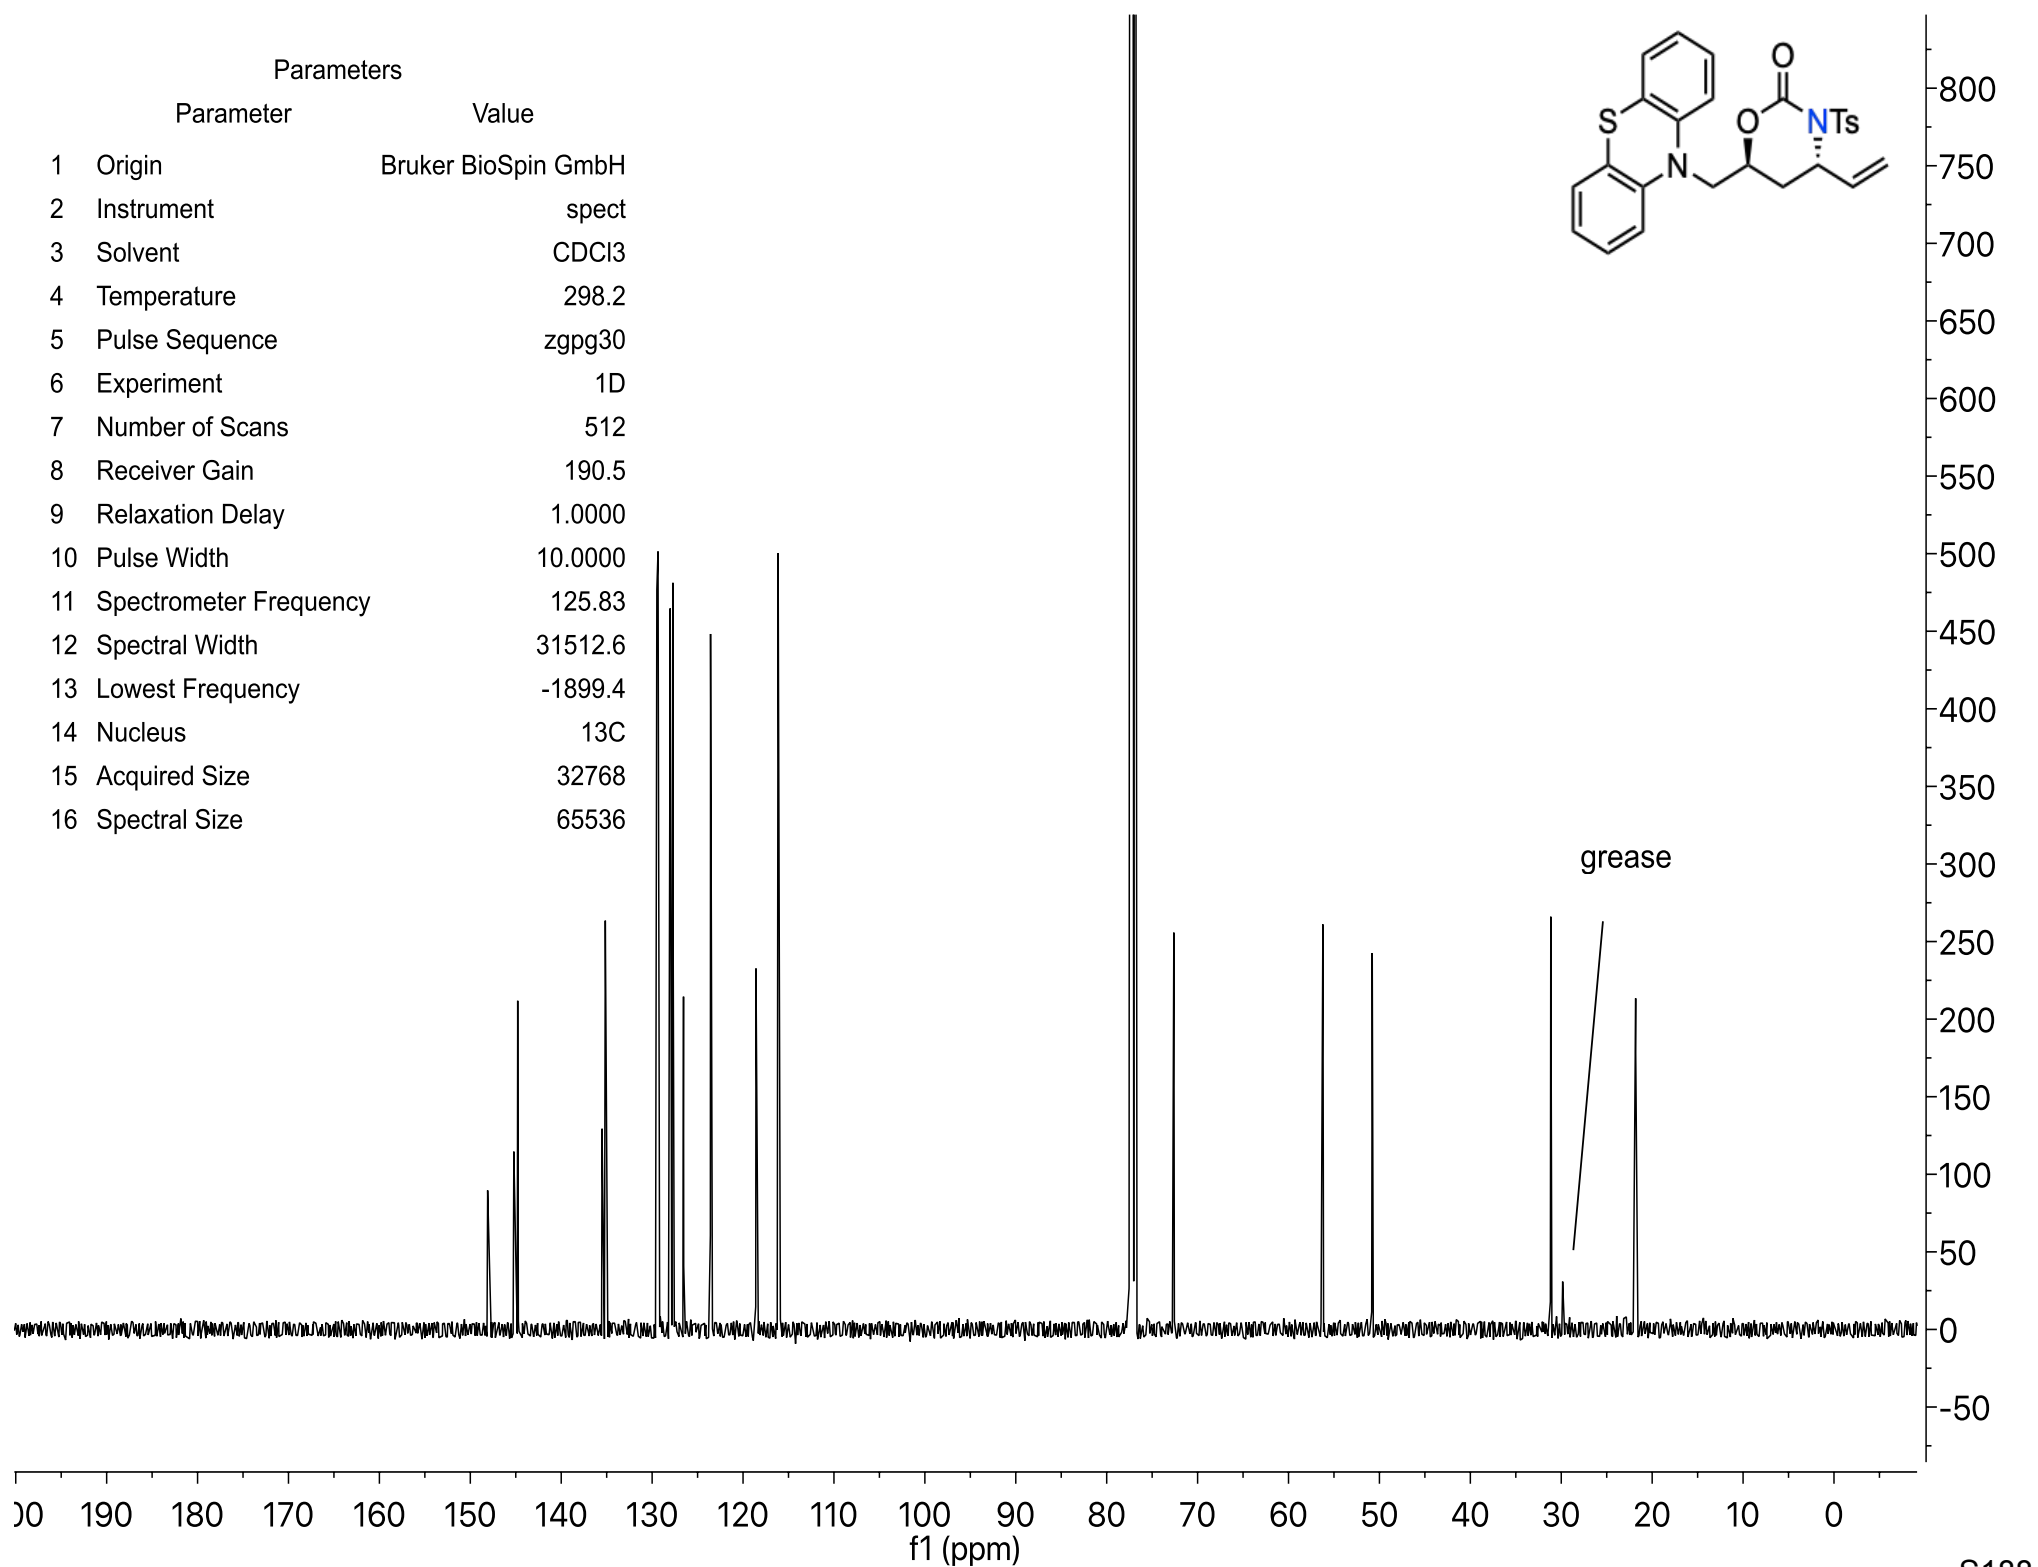

| Parameter                 | Value               |
|---------------------------|---------------------|
| 1 Origin                  | Bruker BioSpin GmbH |
| 2 Spectrometer            | spect               |
| 3 Solvent                 | CDCl3               |
| 4 Temperature             | 296.1               |
| 5 Pulse Sequence          | zg30                |
| 6 Experiment              | 1D                  |
| 7 Number of Scans         | 6                   |
| 8 Receiver Gain           | 76                  |
| 9 Relaxation Delay        | 15.0000             |
| 10 Pulse Width            | 12.0000             |
| 11 Spectrometer Frequency | 500.35              |
| 12 Spectral Width         | 10000.0             |
| 13 Lowest Frequency       | -1922.9             |
| 14 Nucleus                | 1H                  |
| 15 Acquired Size          | 32768               |
| 16 Spectral Size          | 65536               |

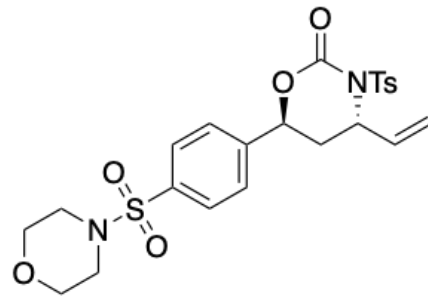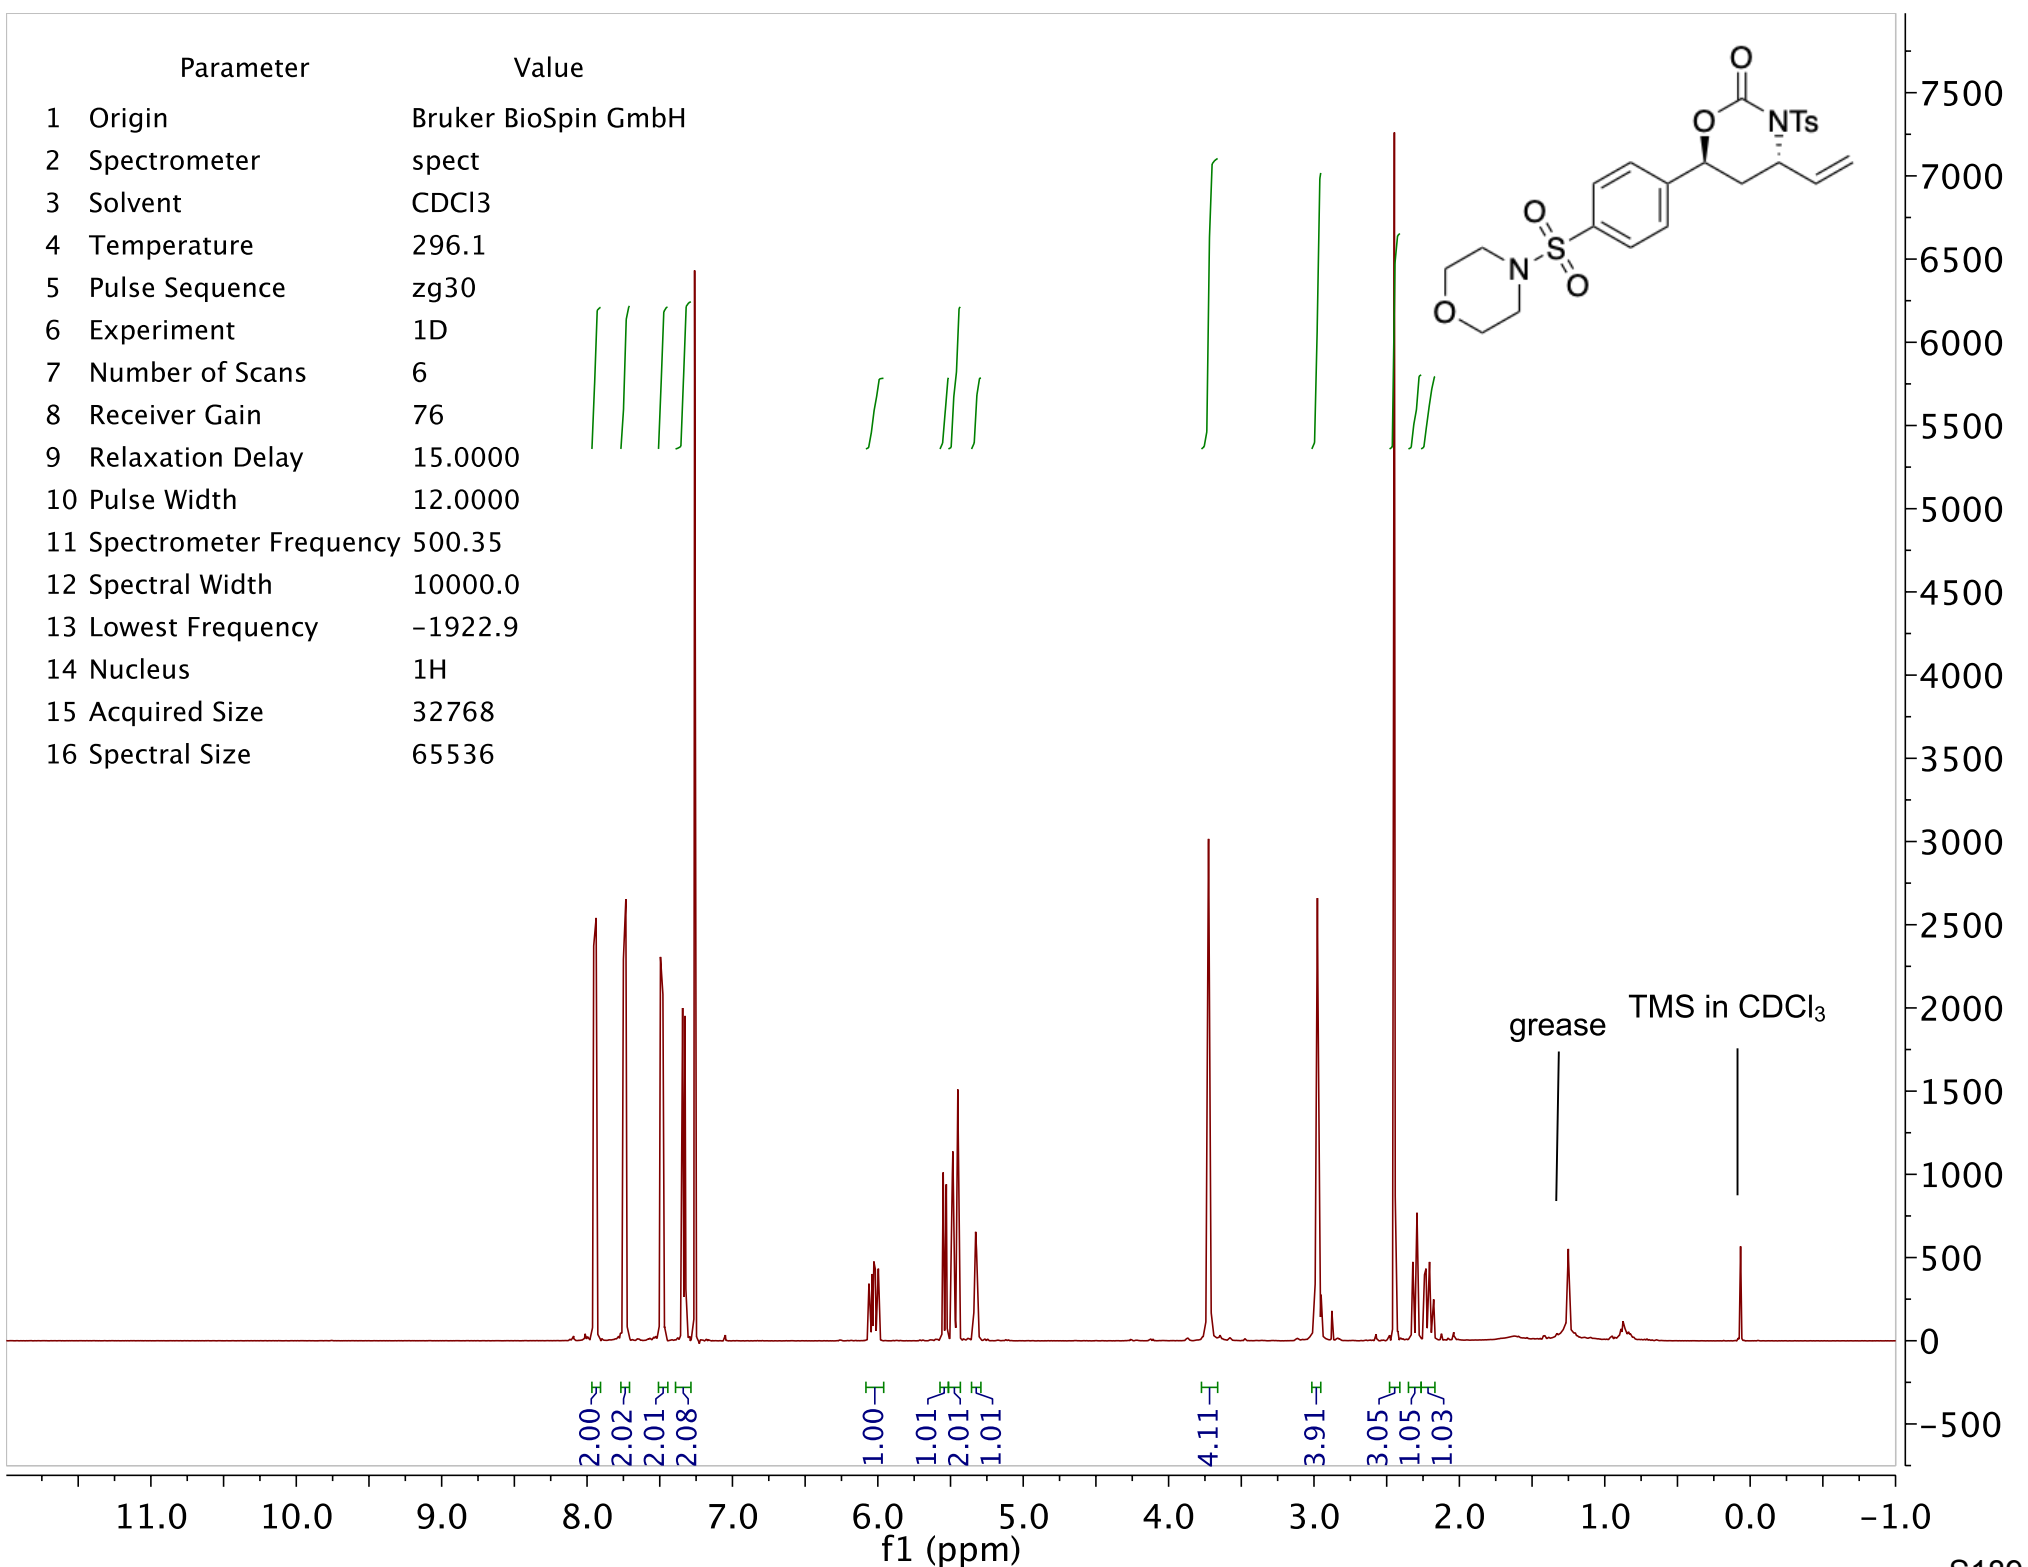

| Parameter                 | Value               |
|---------------------------|---------------------|
| 1 Origin                  | Bruker BioSpin GmbH |
| 2 Spectrometer            | spect               |
| 3 Solvent                 | CDCl3               |
| 4 Temperature             | 296.2               |
| 5 Pulse Sequence          | zgpg30              |
| 6 Experiment              | 1D                  |
| 7 Number of Scans         | 800                 |
| 8 Receiver Gain           | 191                 |
| 9 Relaxation Delay        | 1.0000              |
| 10 Pulse Width            | 10.0000             |
| 11 Spectrometer Frequency | 125.83              |
| 12 Spectral Width         | 31512.6             |
| 13 Lowest Frequency       | -1902.0             |
| 14 Nucleus                | 13C                 |
| 15 Acquired Size          | 32768               |
| 16 Spectral Size          | 65536               |

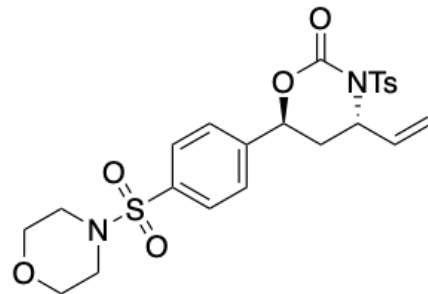

190 180 170 160 150 140 130 120 110 100 90 80 70 60 50 40 30 20 10

f1 (ppm)



| Parameter                 | Value               |
|---------------------------|---------------------|
| 1 Origin                  | Bruker BioSpin GmbH |
| 2 Instrument              | spect               |
| 3 Solvent                 | CDCl3               |
| 4 Temperature             | 298.2               |
| 5 Pulse Sequence          | zg30                |
| 6 Experiment              | 1D                  |
| 7 Number of Scans         | 8                   |
| 8 Receiver Gain           | 61.8                |
| 9 Relaxation Delay        | 15.0000             |
| 10 Pulse Width            | 12.0000             |
| 11 Spectrometer Frequency | 500.35              |
| 12 Spectral Width         | 10000.0             |
| 13 Lowest Frequency       | -1922.2             |
| 14 Nucleus                | 1H                  |
| 15 Acquired Size          | 32768               |
| 16 Spectral Size          | 65536               |

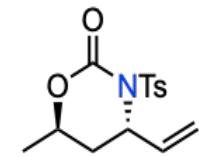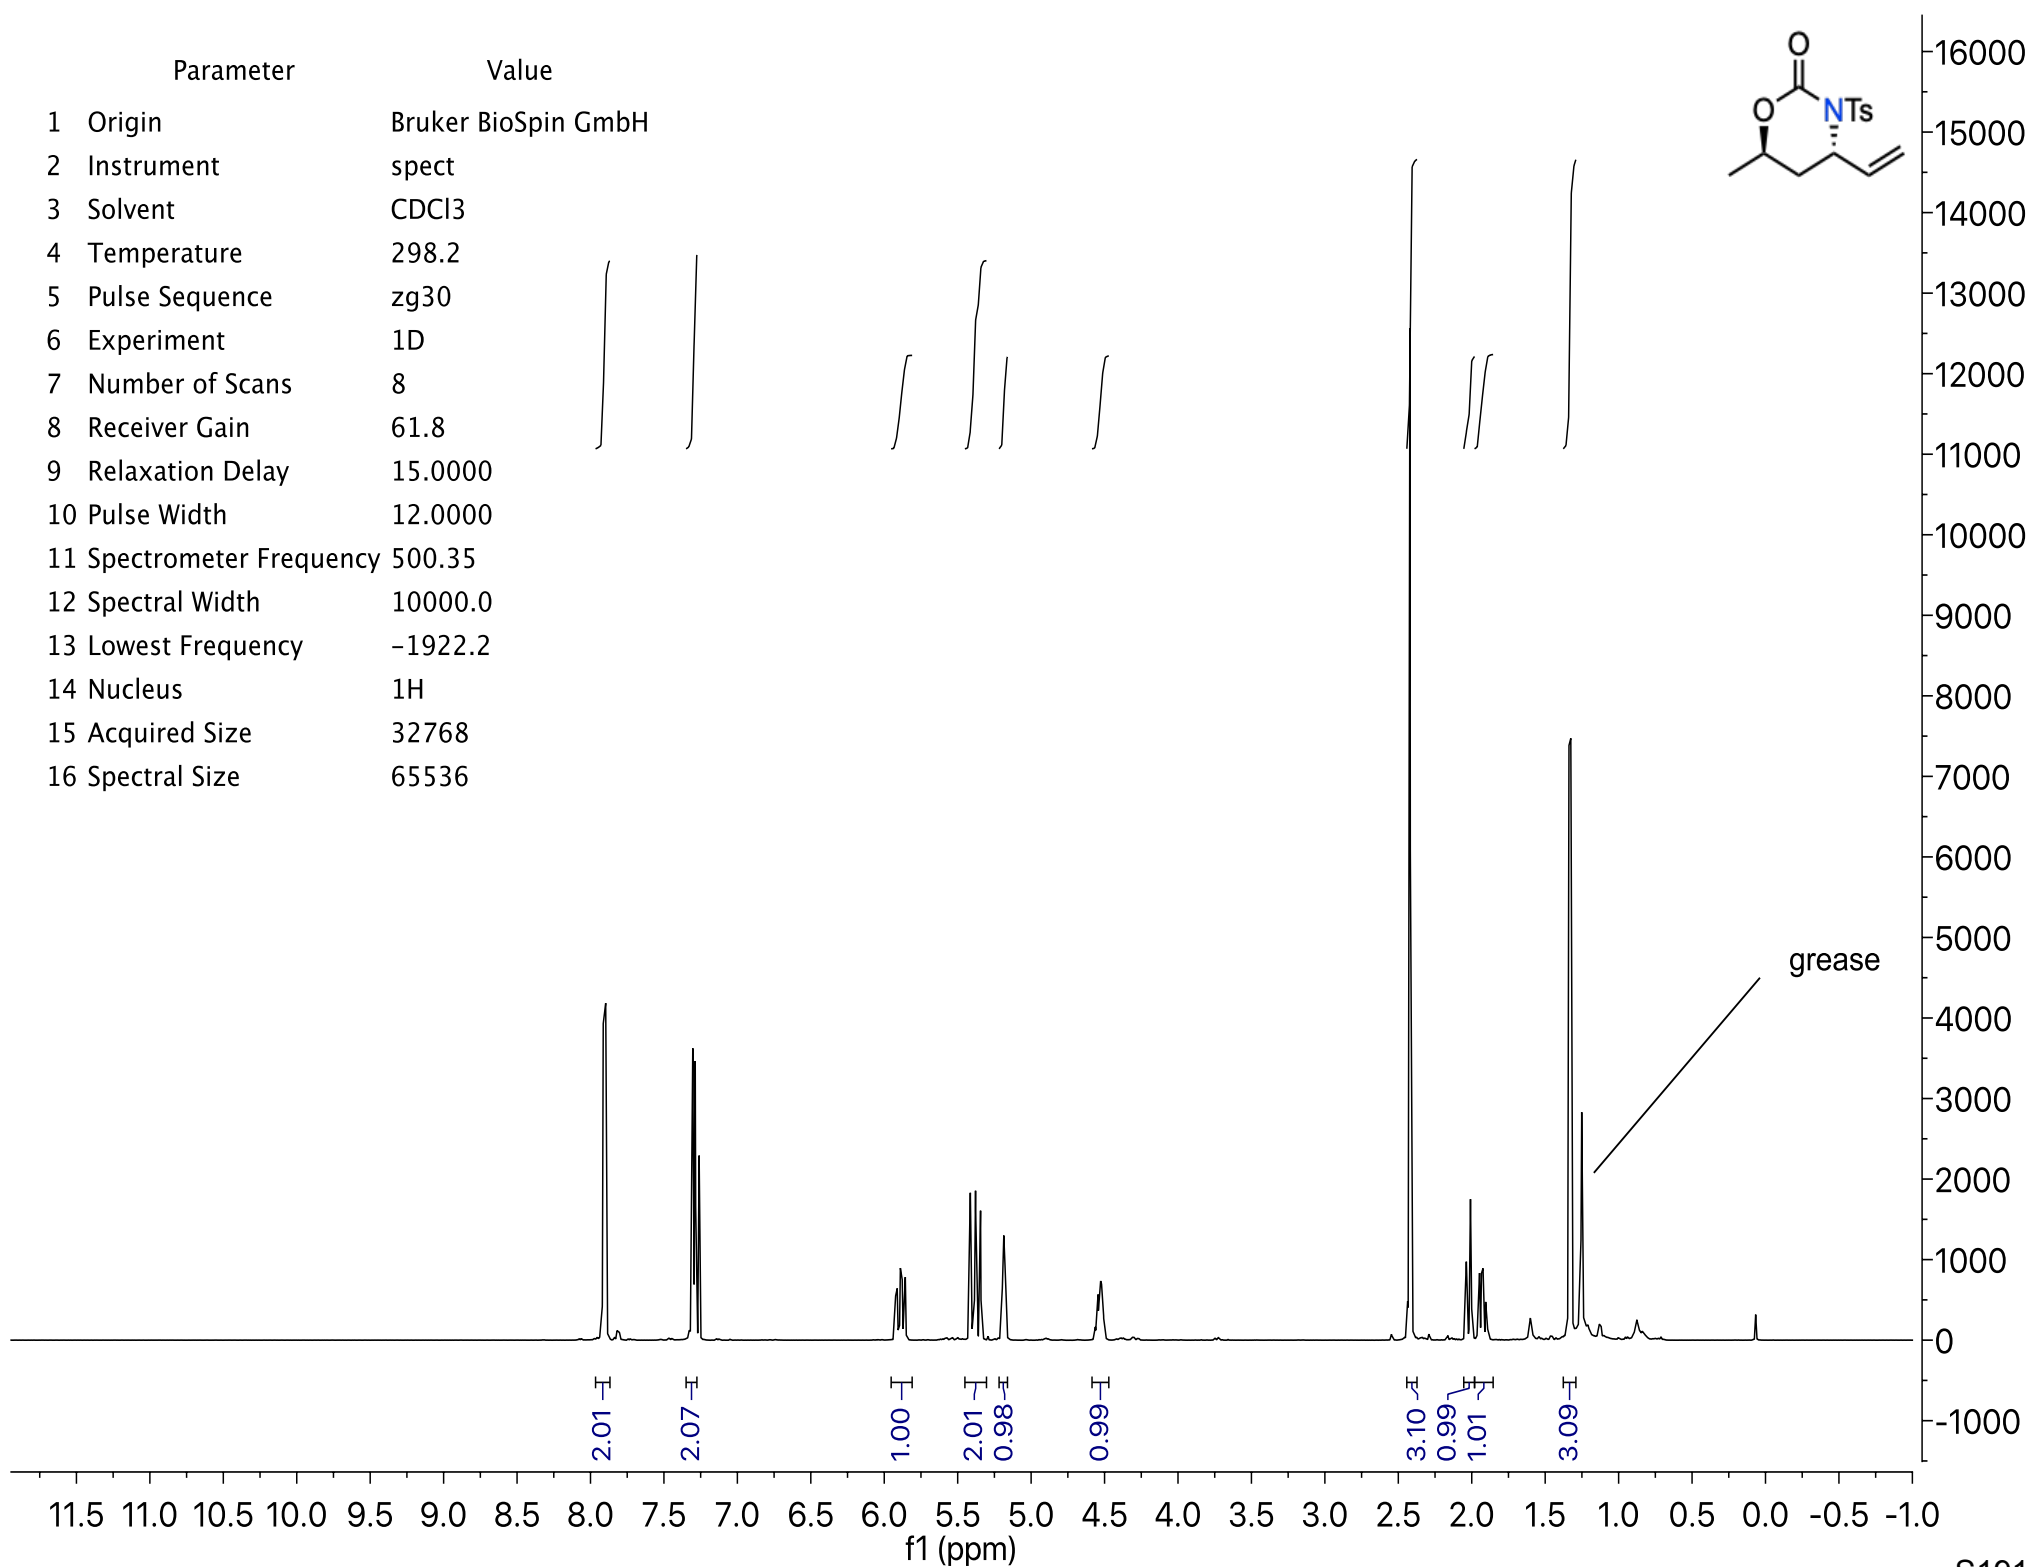

| Parameter                 | Value               |
|---------------------------|---------------------|
| 1 Origin                  | Bruker BioSpin GmbH |
| 2 Instrument              | spect               |
| 3 Solvent                 | CDCl3               |
| 4 Temperature             | 298.1               |
| 5 Pulse Sequence          | zgpg30              |
| 6 Experiment              | 1D                  |
| 7 Number of Scans         | 512                 |
| 8 Receiver Gain           | 190.5               |
| 9 Relaxation Delay        | 1.0000              |
| 10 Pulse Width            | 10.0000             |
| 11 Spectrometer Frequency | 125.83              |
| 12 Spectral Width         | 31512.6             |
| 13 Lowest Frequency       | -1901.3             |
| 14 Nucleus                | 13C                 |
| 15 Acquired Size          | 32768               |
| 16 Spectral Size          | 65536               |

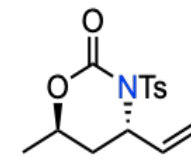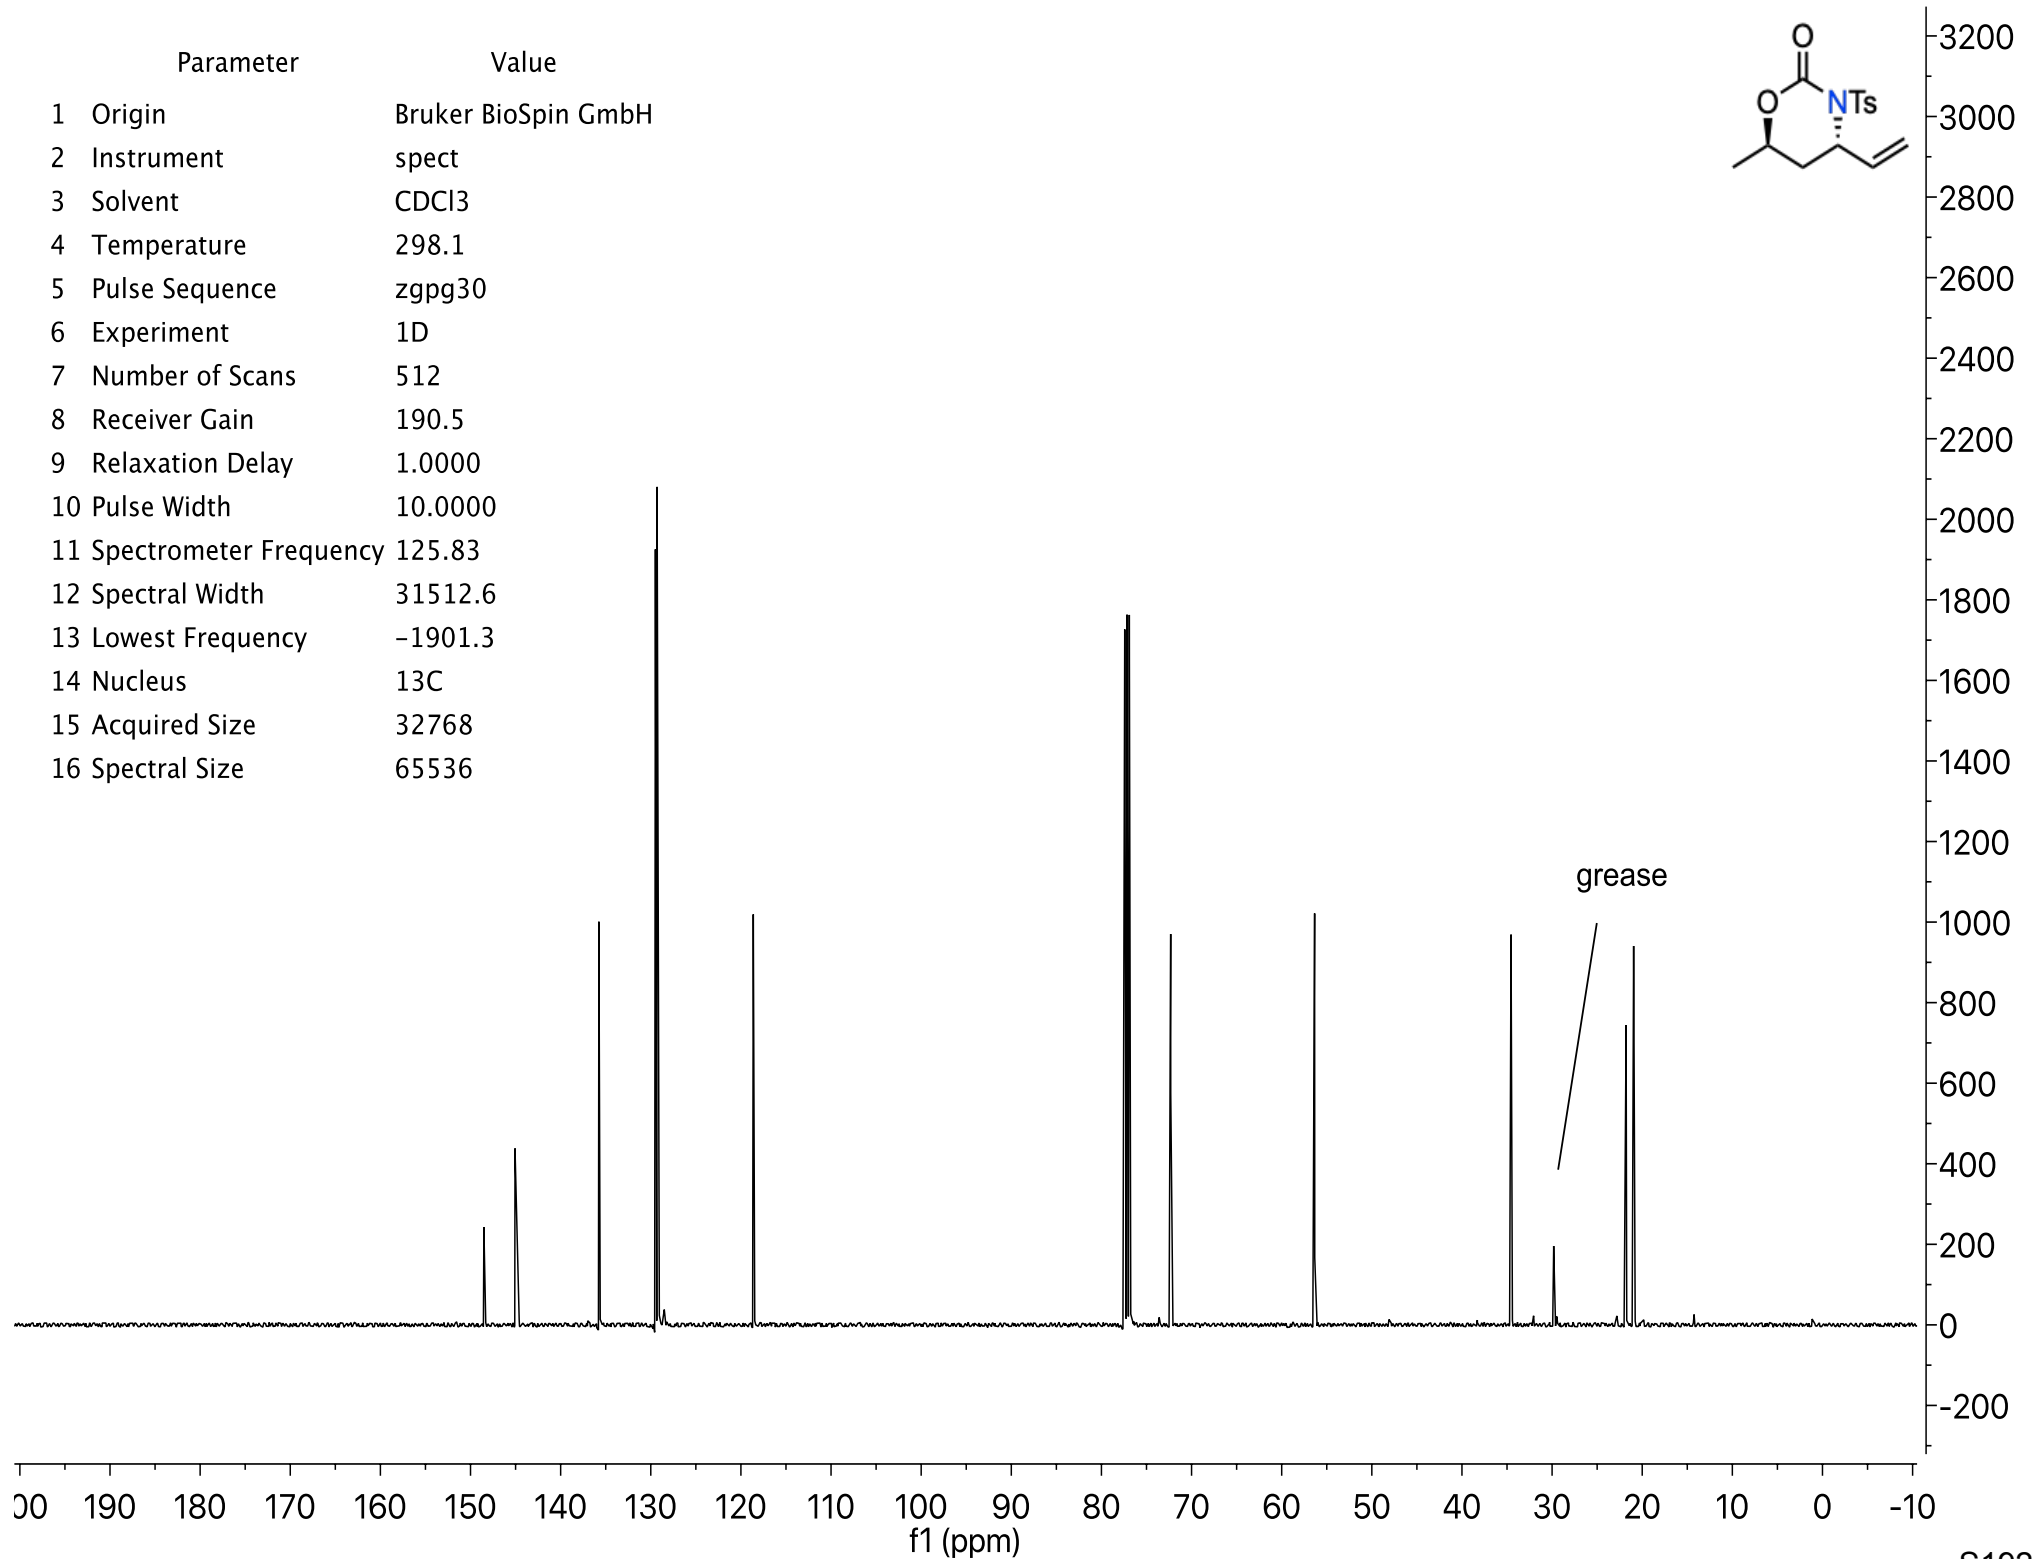

| Parameter                 | Value               |
|---------------------------|---------------------|
| 1 Origin                  | Bruker BioSpin GmbH |
| 2 Instrument              | spect               |
| 3 Solvent                 | CDCl3               |
| 4 Temperature             | 298.0               |
| 5 Pulse Sequence          | zg30                |
| 6 Experiment              | 1D                  |
| 7 Number of Scans         | 16                  |
| 8 Receiver Gain           | 55.0                |
| 9 Relaxation Delay        | 15.0000             |
| 10 Pulse Width            | 12.0000             |
| 11 Spectrometer Frequency | 500.35              |
| 12 Spectral Width         | 10000.0             |
| 13 Lowest Frequency       | -1922.9             |
| 14 Nucleus                | 1H                  |
| 15 Acquired Size          | 32768               |
| 16 Spectral Size          | 65536               |

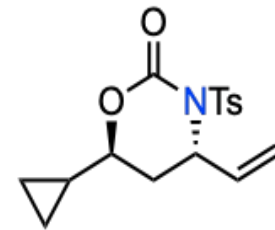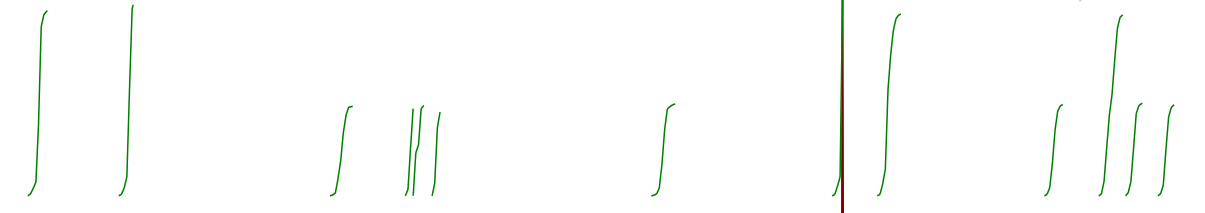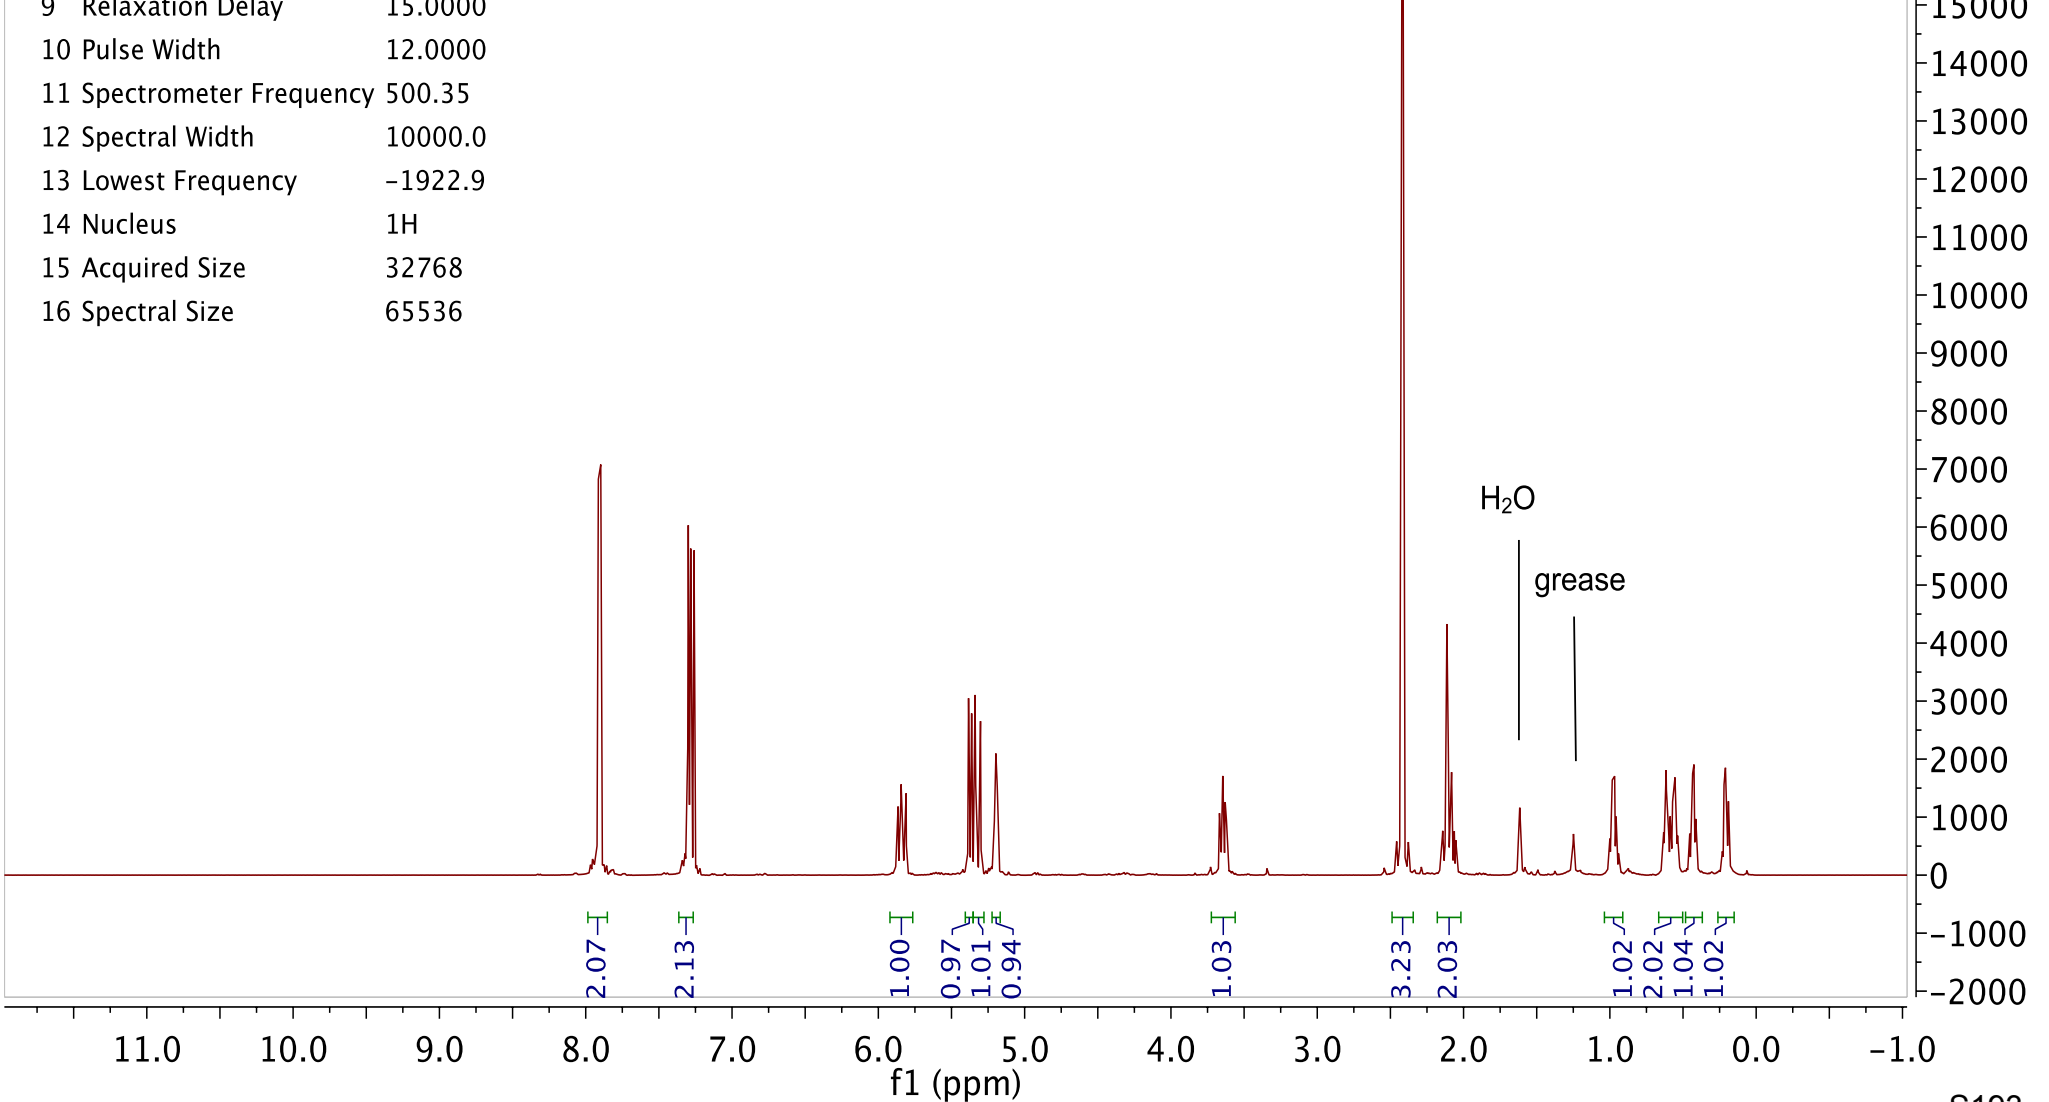

| Parameter                 | Value               |
|---------------------------|---------------------|
| 1 Origin                  | Bruker BioSpin GmbH |
| 2 Instrument              | spect               |
| 3 Solvent                 | CDCl3               |
| 4 Temperature             | 298.0               |
| 5 Pulse Sequence          | zgpg30              |
| 6 Experiment              | 1D                  |
| 7 Number of Scans         | 128                 |
| 8 Receiver Gain           | 190.5               |
| 9 Relaxation Delay        | 2.0000              |
| 10 Pulse Width            | 10.0000             |
| 11 Spectrometer Frequency | 125.83              |
| 12 Spectral Width         | 31512.6             |
| 13 Lowest Frequency       | -1902.9             |
| 14 Nucleus                | 13C                 |
| 15 Acquired Size          | 32768               |
| 16 Spectral Size          | 65536               |

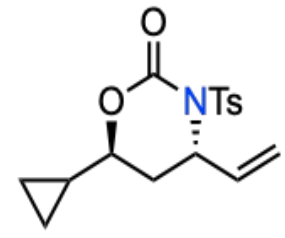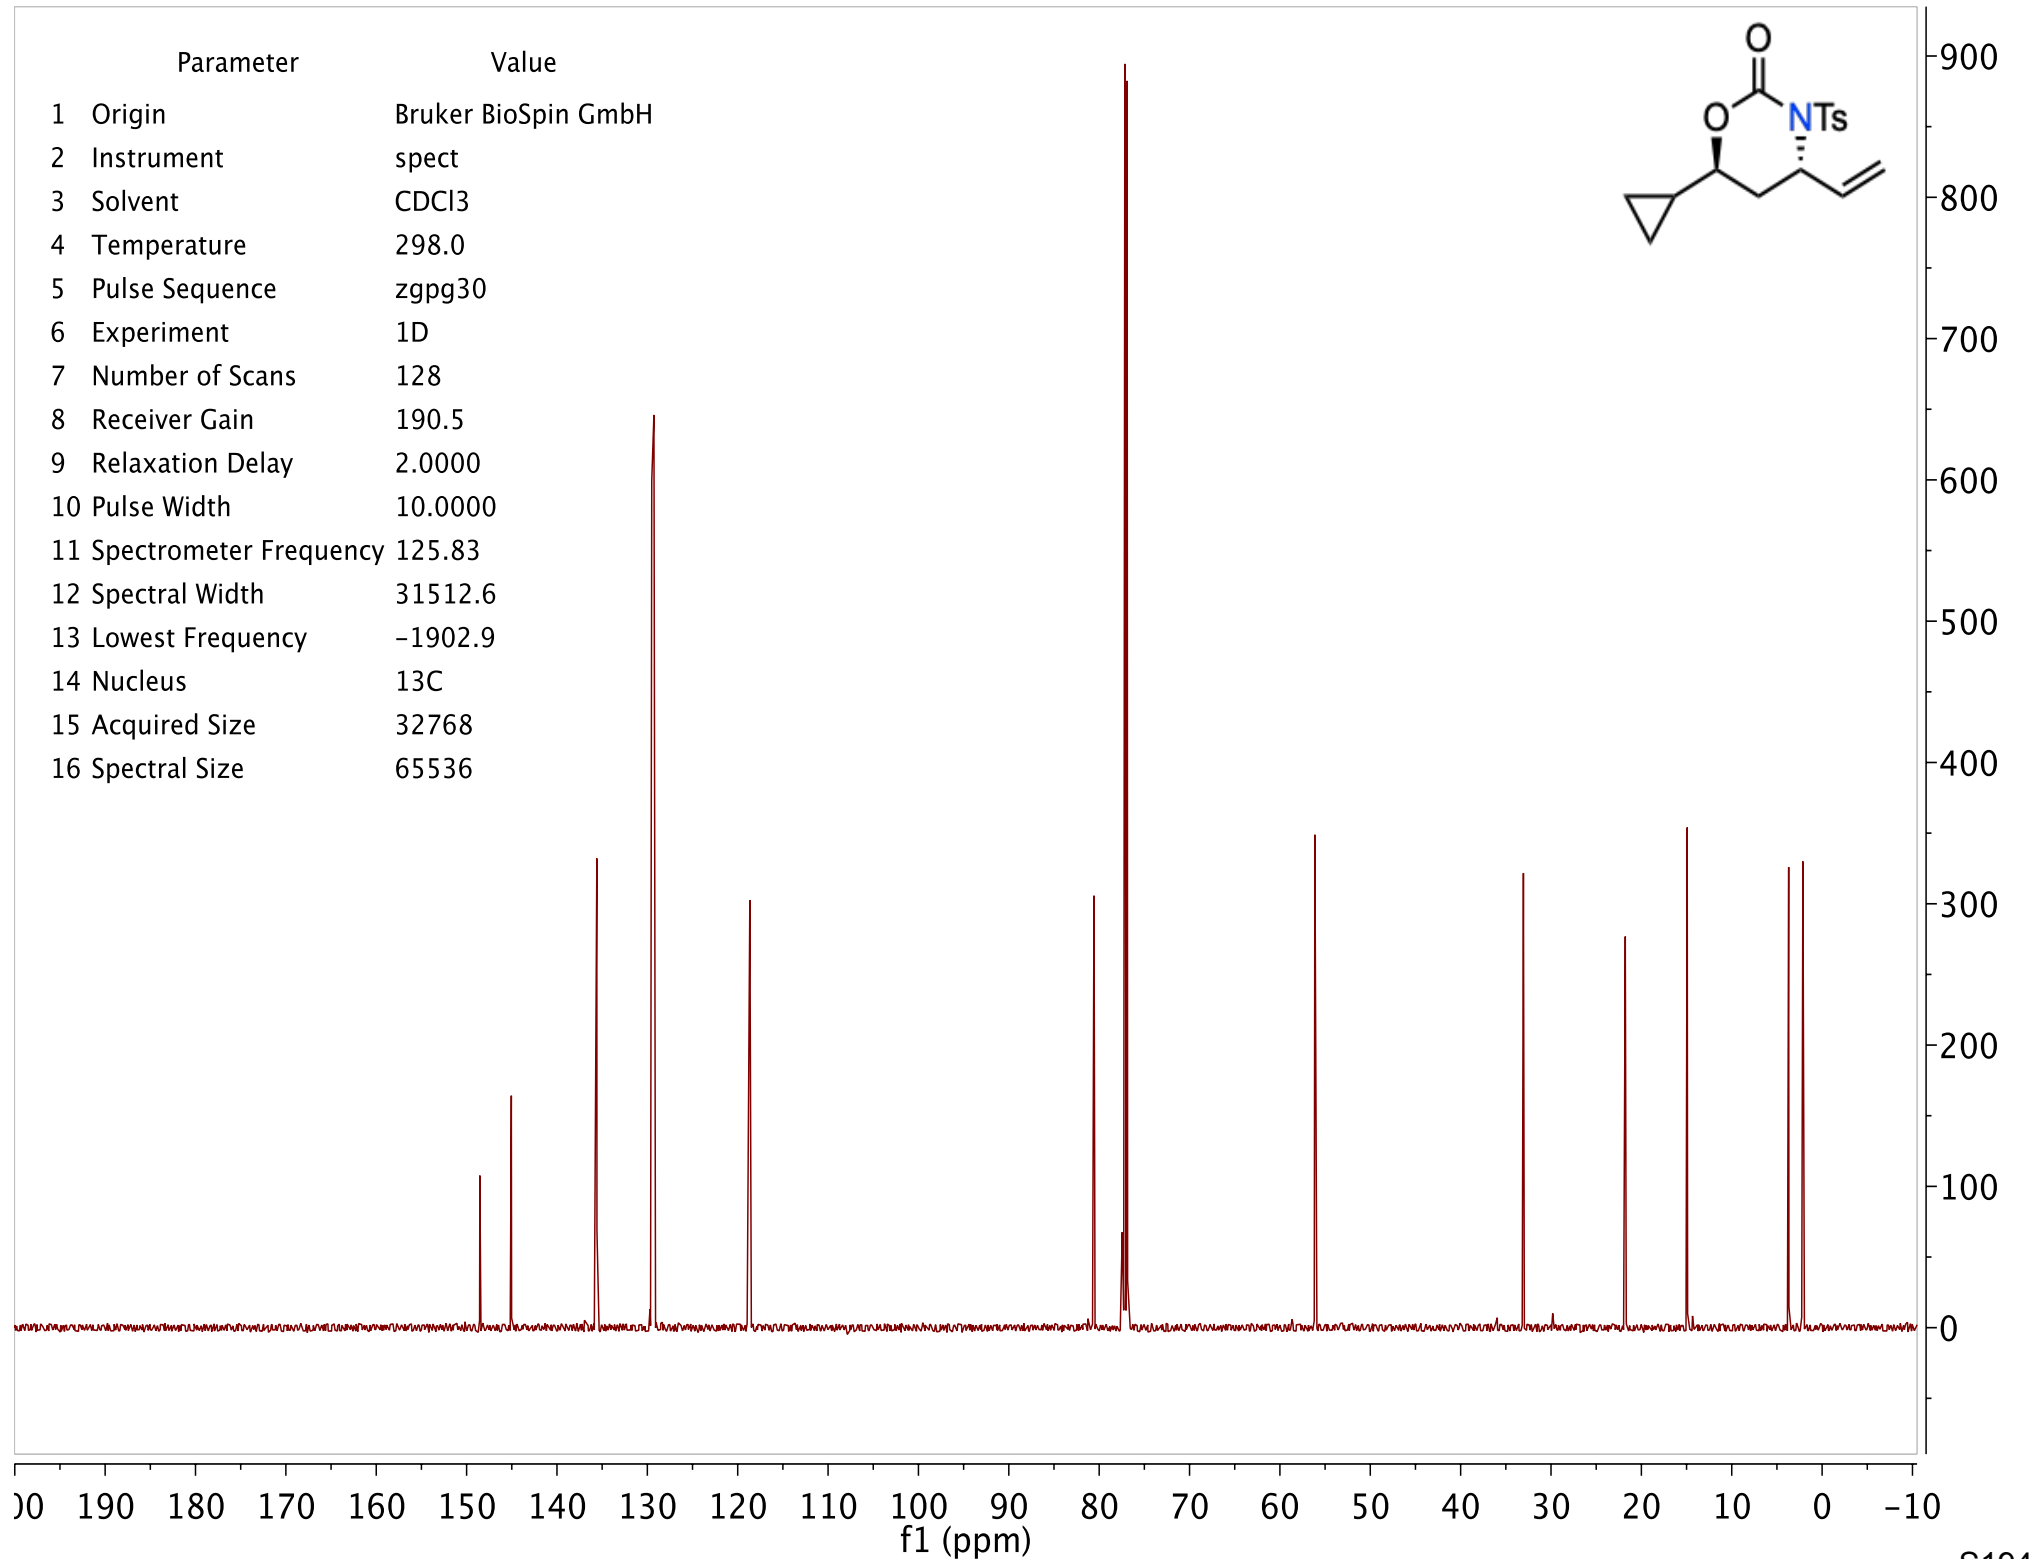

| Parameter                 | Value               |
|---------------------------|---------------------|
| 1 Origin                  | Bruker BioSpin GmbH |
| 2 Spectrometer            | spect               |
| 3 Solvent                 | CDCl3               |
| 4 Temperature             | 298.1               |
| 5 Pulse Sequence          | zg30                |
| 6 Experiment              | 1D                  |
| 7 Number of Scans         | 8                   |
| 8 Receiver Gain           | 30                  |
| 9 Relaxation Delay        | 15.0000             |
| 10 Pulse Width            | 12.0000             |
| 11 Spectrometer Frequency | 500.35              |
| 12 Spectral Width         | 10000.0             |
| 13 Lowest Frequency       | -1921.8             |
| 14 Nucleus                | 1H                  |
| 15 Acquired Size          | 32768               |
| 16 Spectral Size          | 65536               |

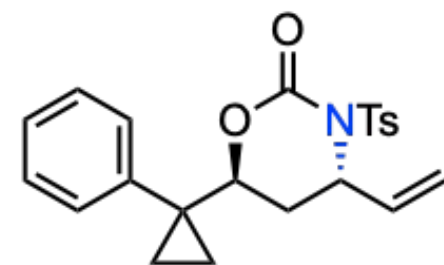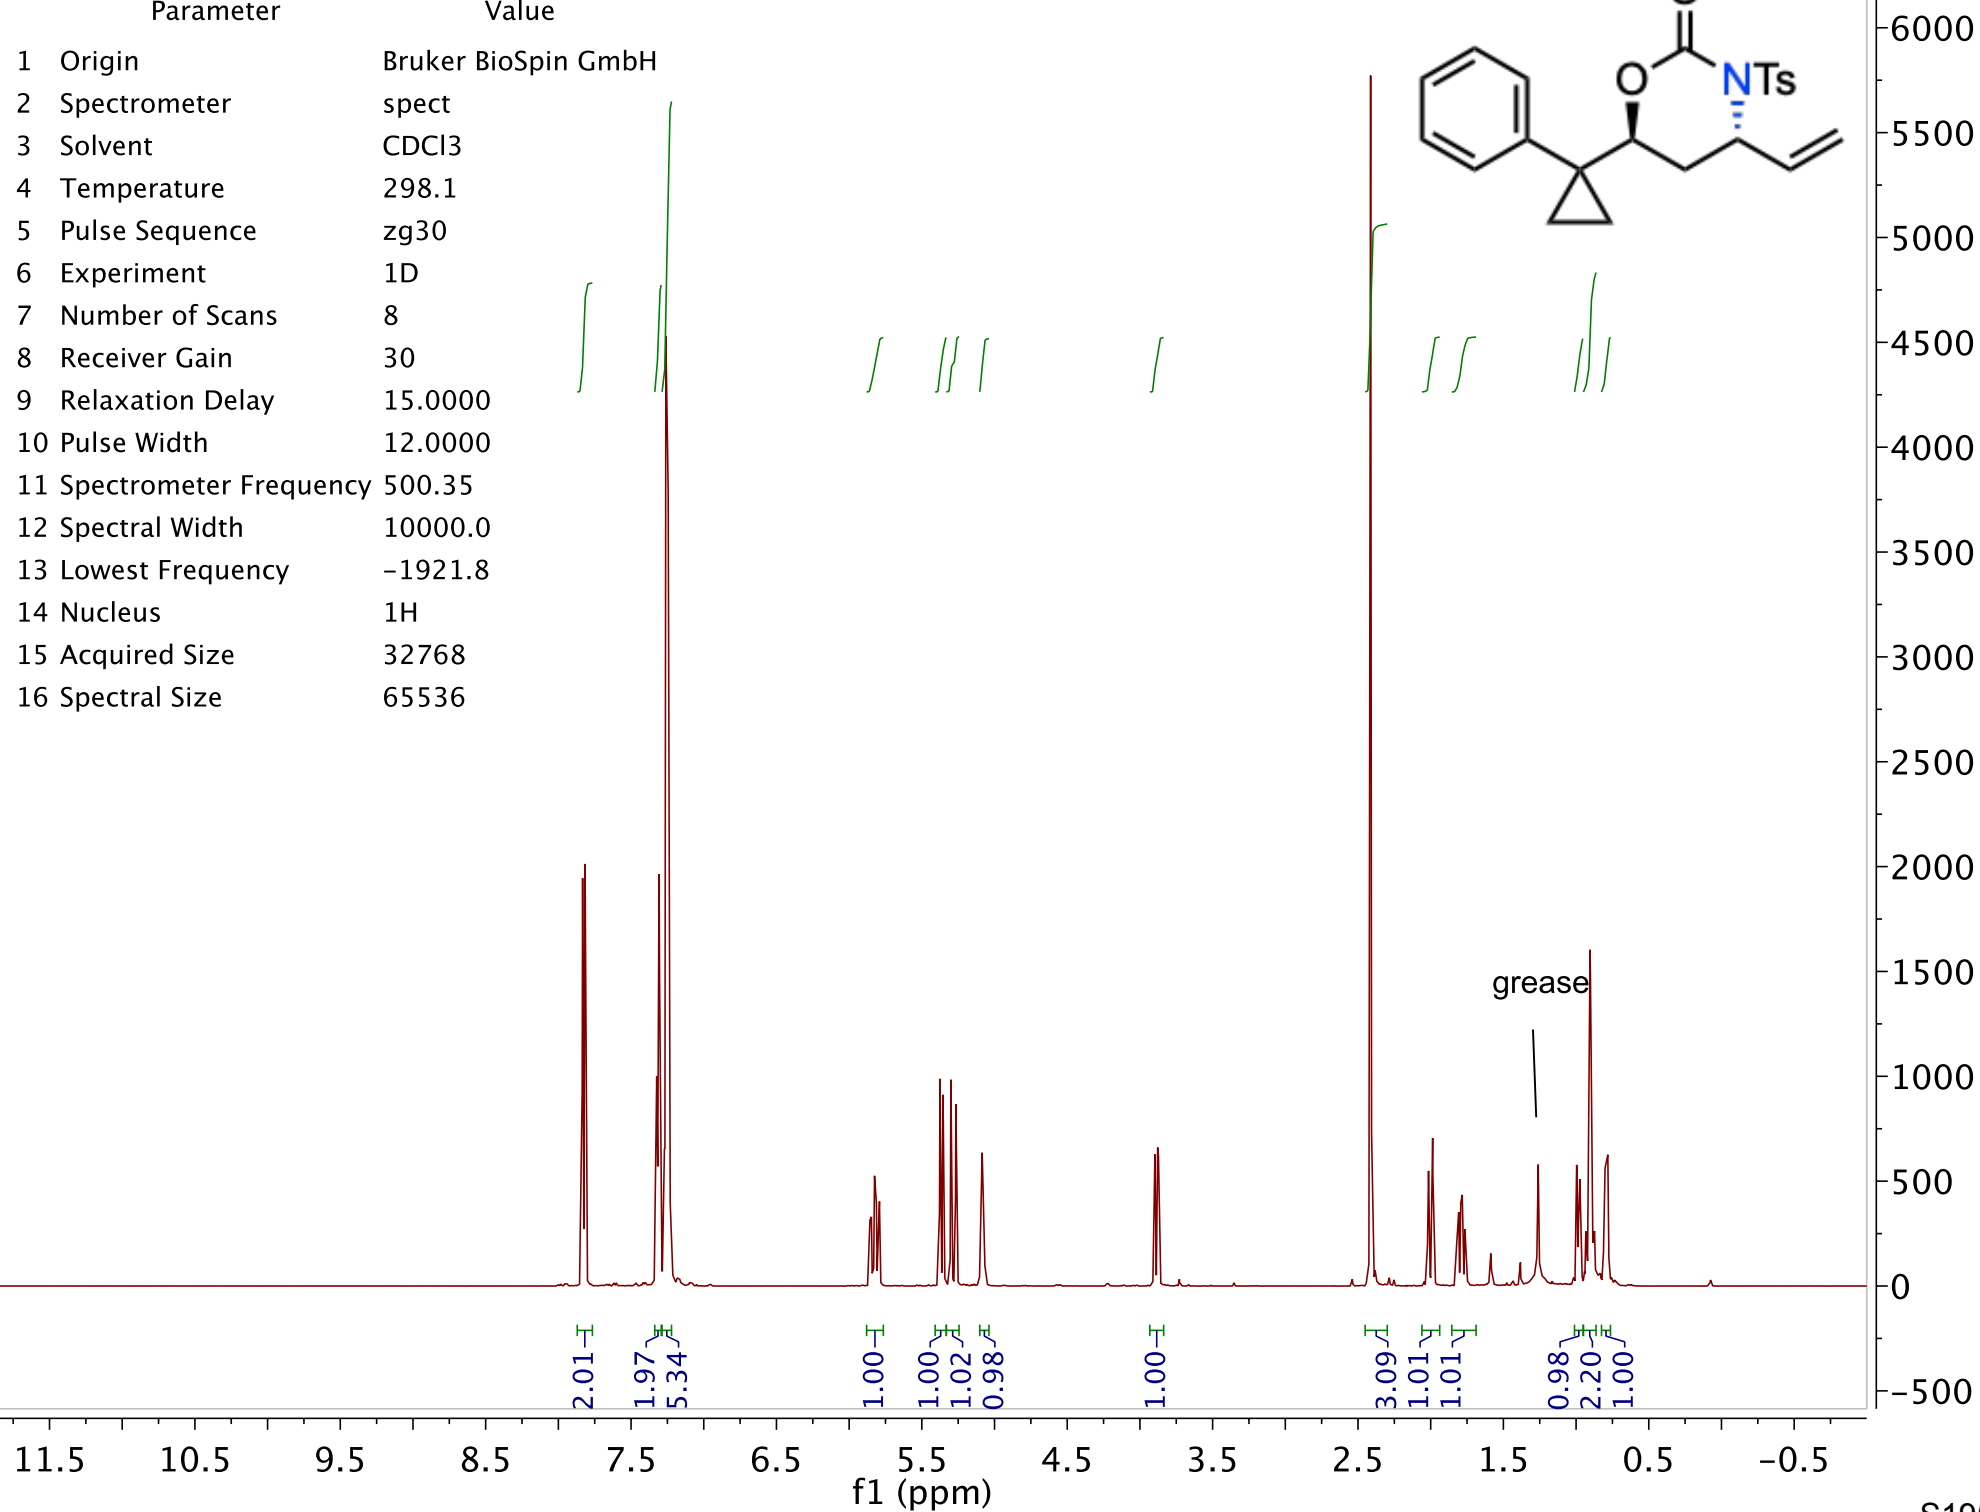

| Parameter                 | Value               |
|---------------------------|---------------------|
| 1 Origin                  | Bruker BioSpin GmbH |
| 2 Spectrometer            | spect               |
| 3 Solvent                 | CDCl3               |
| 4 Temperature             | 298.1               |
| 5 Pulse Sequence          | zgpg30              |
| 6 Experiment              | 1D                  |
| 7 Number of Scans         | 512                 |
| 8 Receiver Gain           | 191                 |
| 9 Relaxation Delay        | 1.0000              |
| 10 Pulse Width            | 10.0000             |
| 11 Spectrometer Frequency | 125.83              |
| 12 Spectral Width         | 31512.6             |
| 13 Lowest Frequency       | -1902.4             |
| 14 Nucleus                | 13C                 |
| 15 Acquired Size          | 32768               |
| 16 Spectral Size          | 65536               |

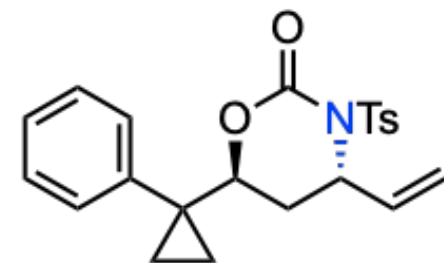

190 180 170 160 150 140 130 120 110 100 90 80 70 60 50 40 30 20 10 0 -10  
f1 (ppm)

| Parameter                 | Value               |
|---------------------------|---------------------|
| 1 Origin                  | Bruker BioSpin GmbH |
| 2 Instrument              | spect               |
| 3 Solvent                 | CDCl3               |
| 4 Temperature             | 298.2               |
| 5 Pulse Sequence          | zg30                |
| 6 Experiment              | 1D                  |
| 7 Number of Scans         | 32                  |
| 8 Receiver Gain           | 76.2                |
| 9 Relaxation Delay        | 1.0000              |
| 10 Pulse Width            | 12.0000             |
| 11 Spectrometer Frequency | 500.35              |
| 12 Spectral Width         | 10000.0             |
| 13 Lowest Frequency       | -1921.3             |
| 14 Nucleus                | 1H                  |
| 15 Acquired Size          | 32768               |
| 16 Spectral Size          | 65536               |

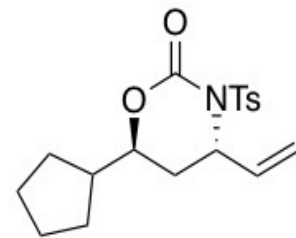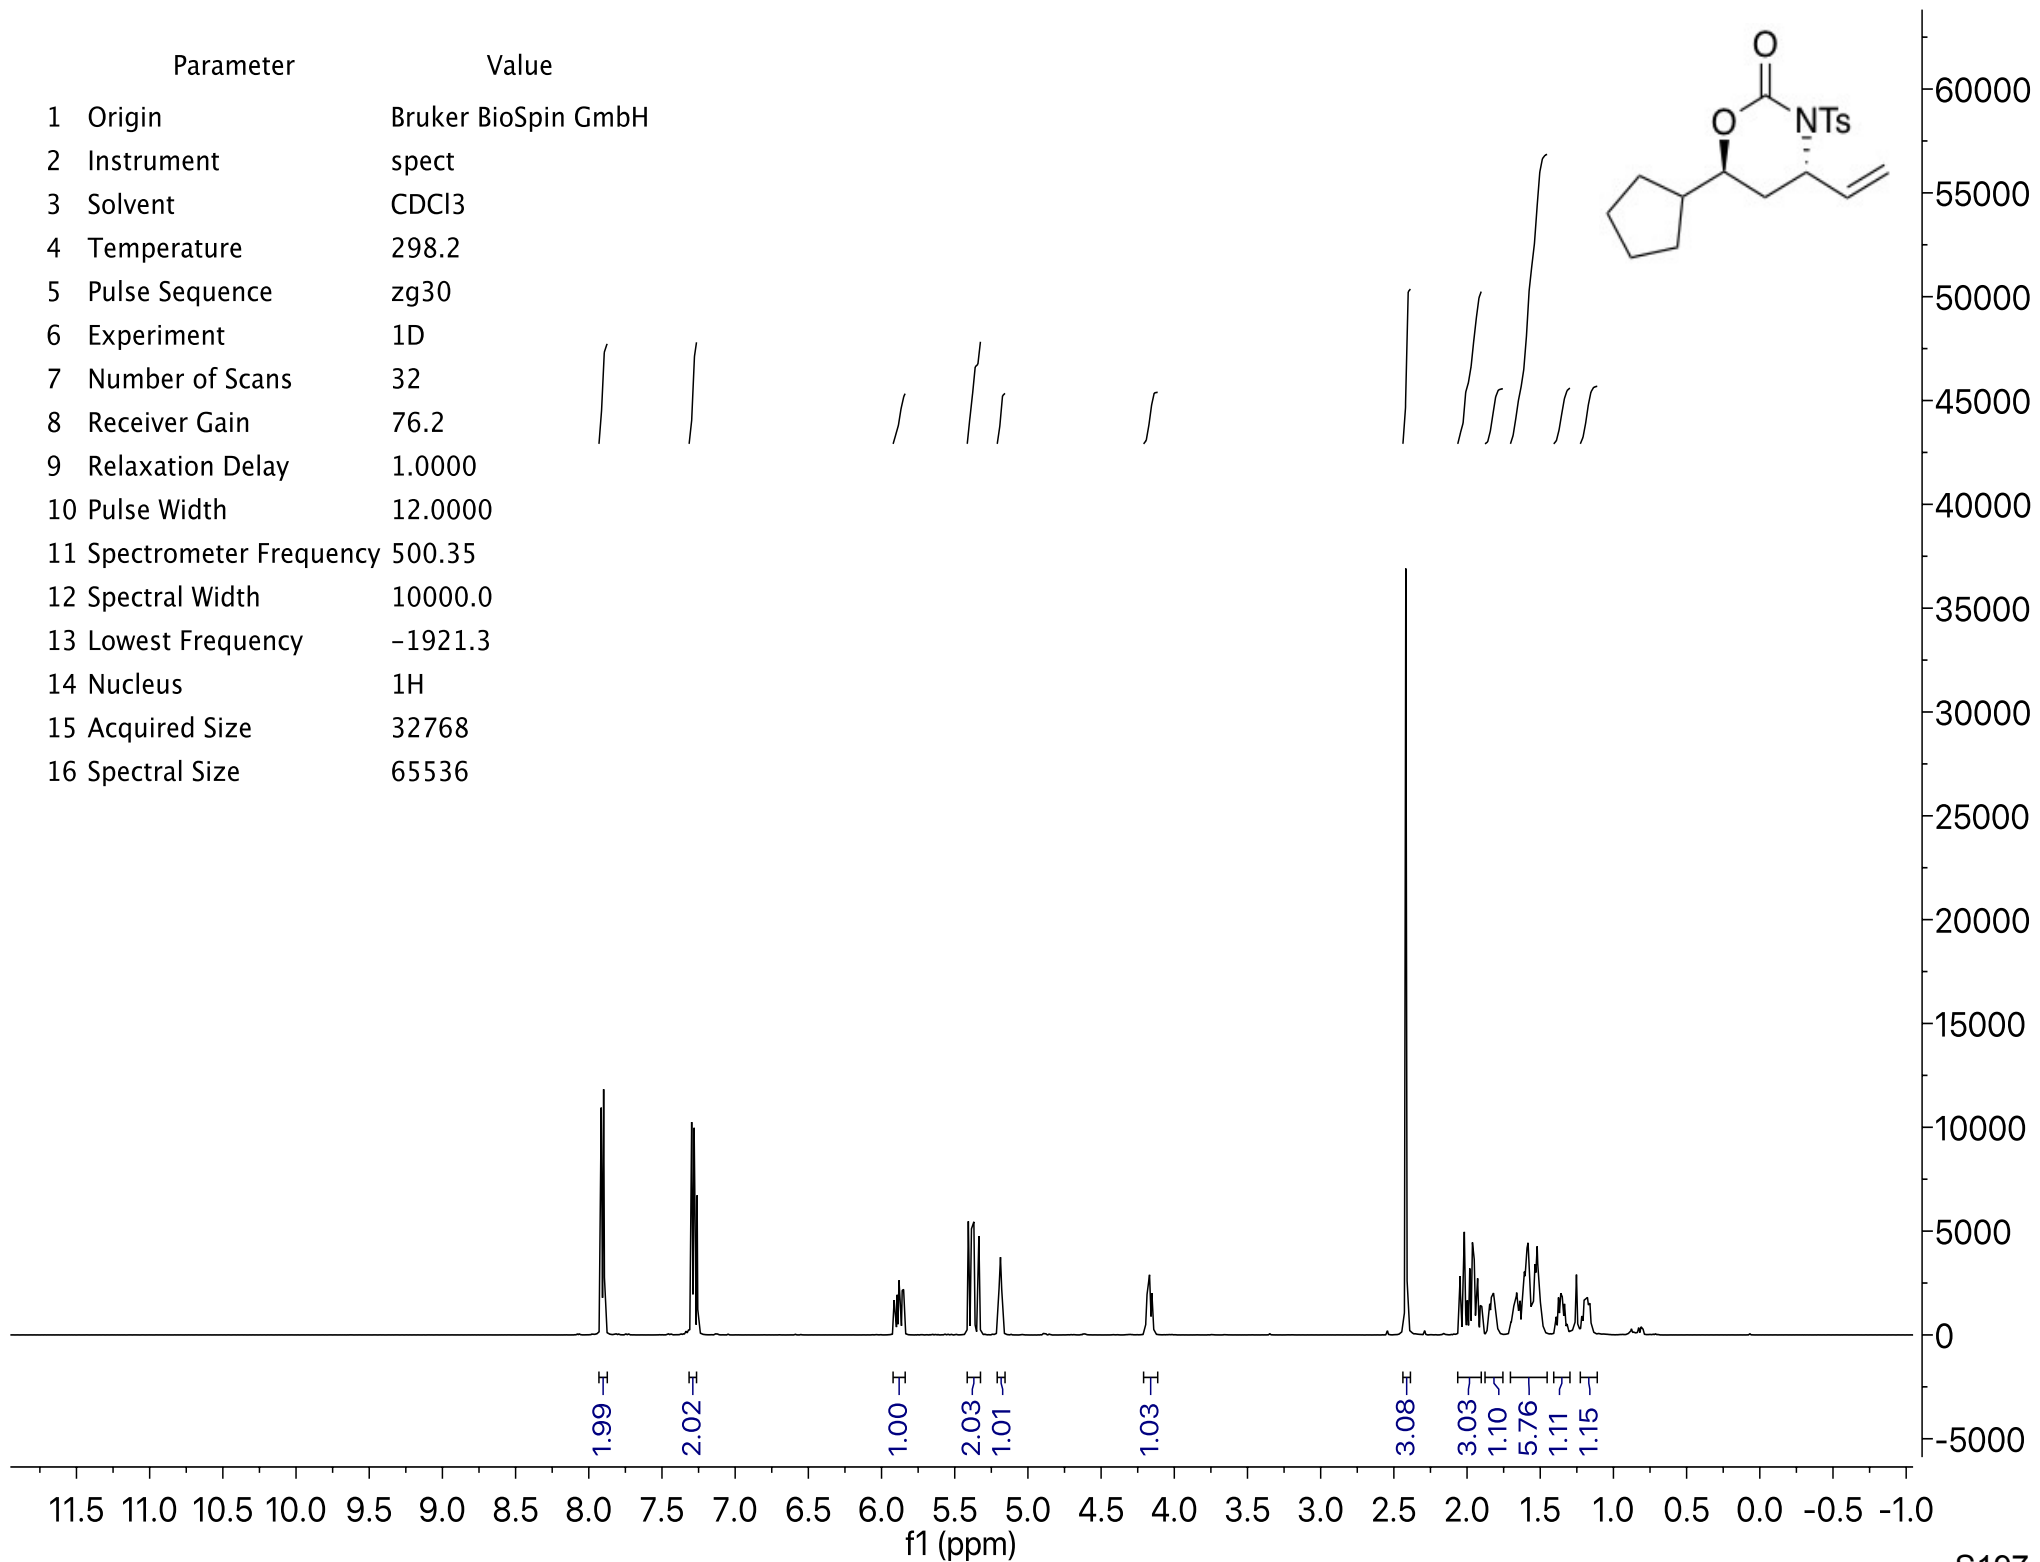

| Parameter                 | Value               |
|---------------------------|---------------------|
| 1 Origin                  | Bruker BioSpin GmbH |
| 2 Instrument              | spect               |
| 3 Solvent                 | CDCl3               |
| 4 Temperature             | 298.2               |
| 5 Pulse Sequence          | zgpg30              |
| 6 Experiment              | 1D                  |
| 7 Number of Scans         | 512                 |
| 8 Receiver Gain           | 190.5               |
| 9 Relaxation Delay        | 2.0000              |
| 10 Pulse Width            | 10.0000             |
| 11 Spectrometer Frequency | 125.83              |
| 12 Spectral Width         | 31512.6             |
| 13 Lowest Frequency       | -1899.7             |
| 14 Nucleus                | 13C                 |
| 15 Acquired Size          | 32768               |
| 16 Spectral Size          | 65536               |

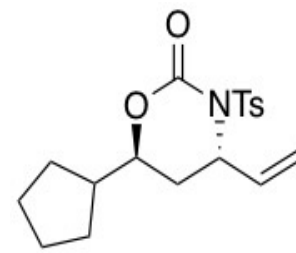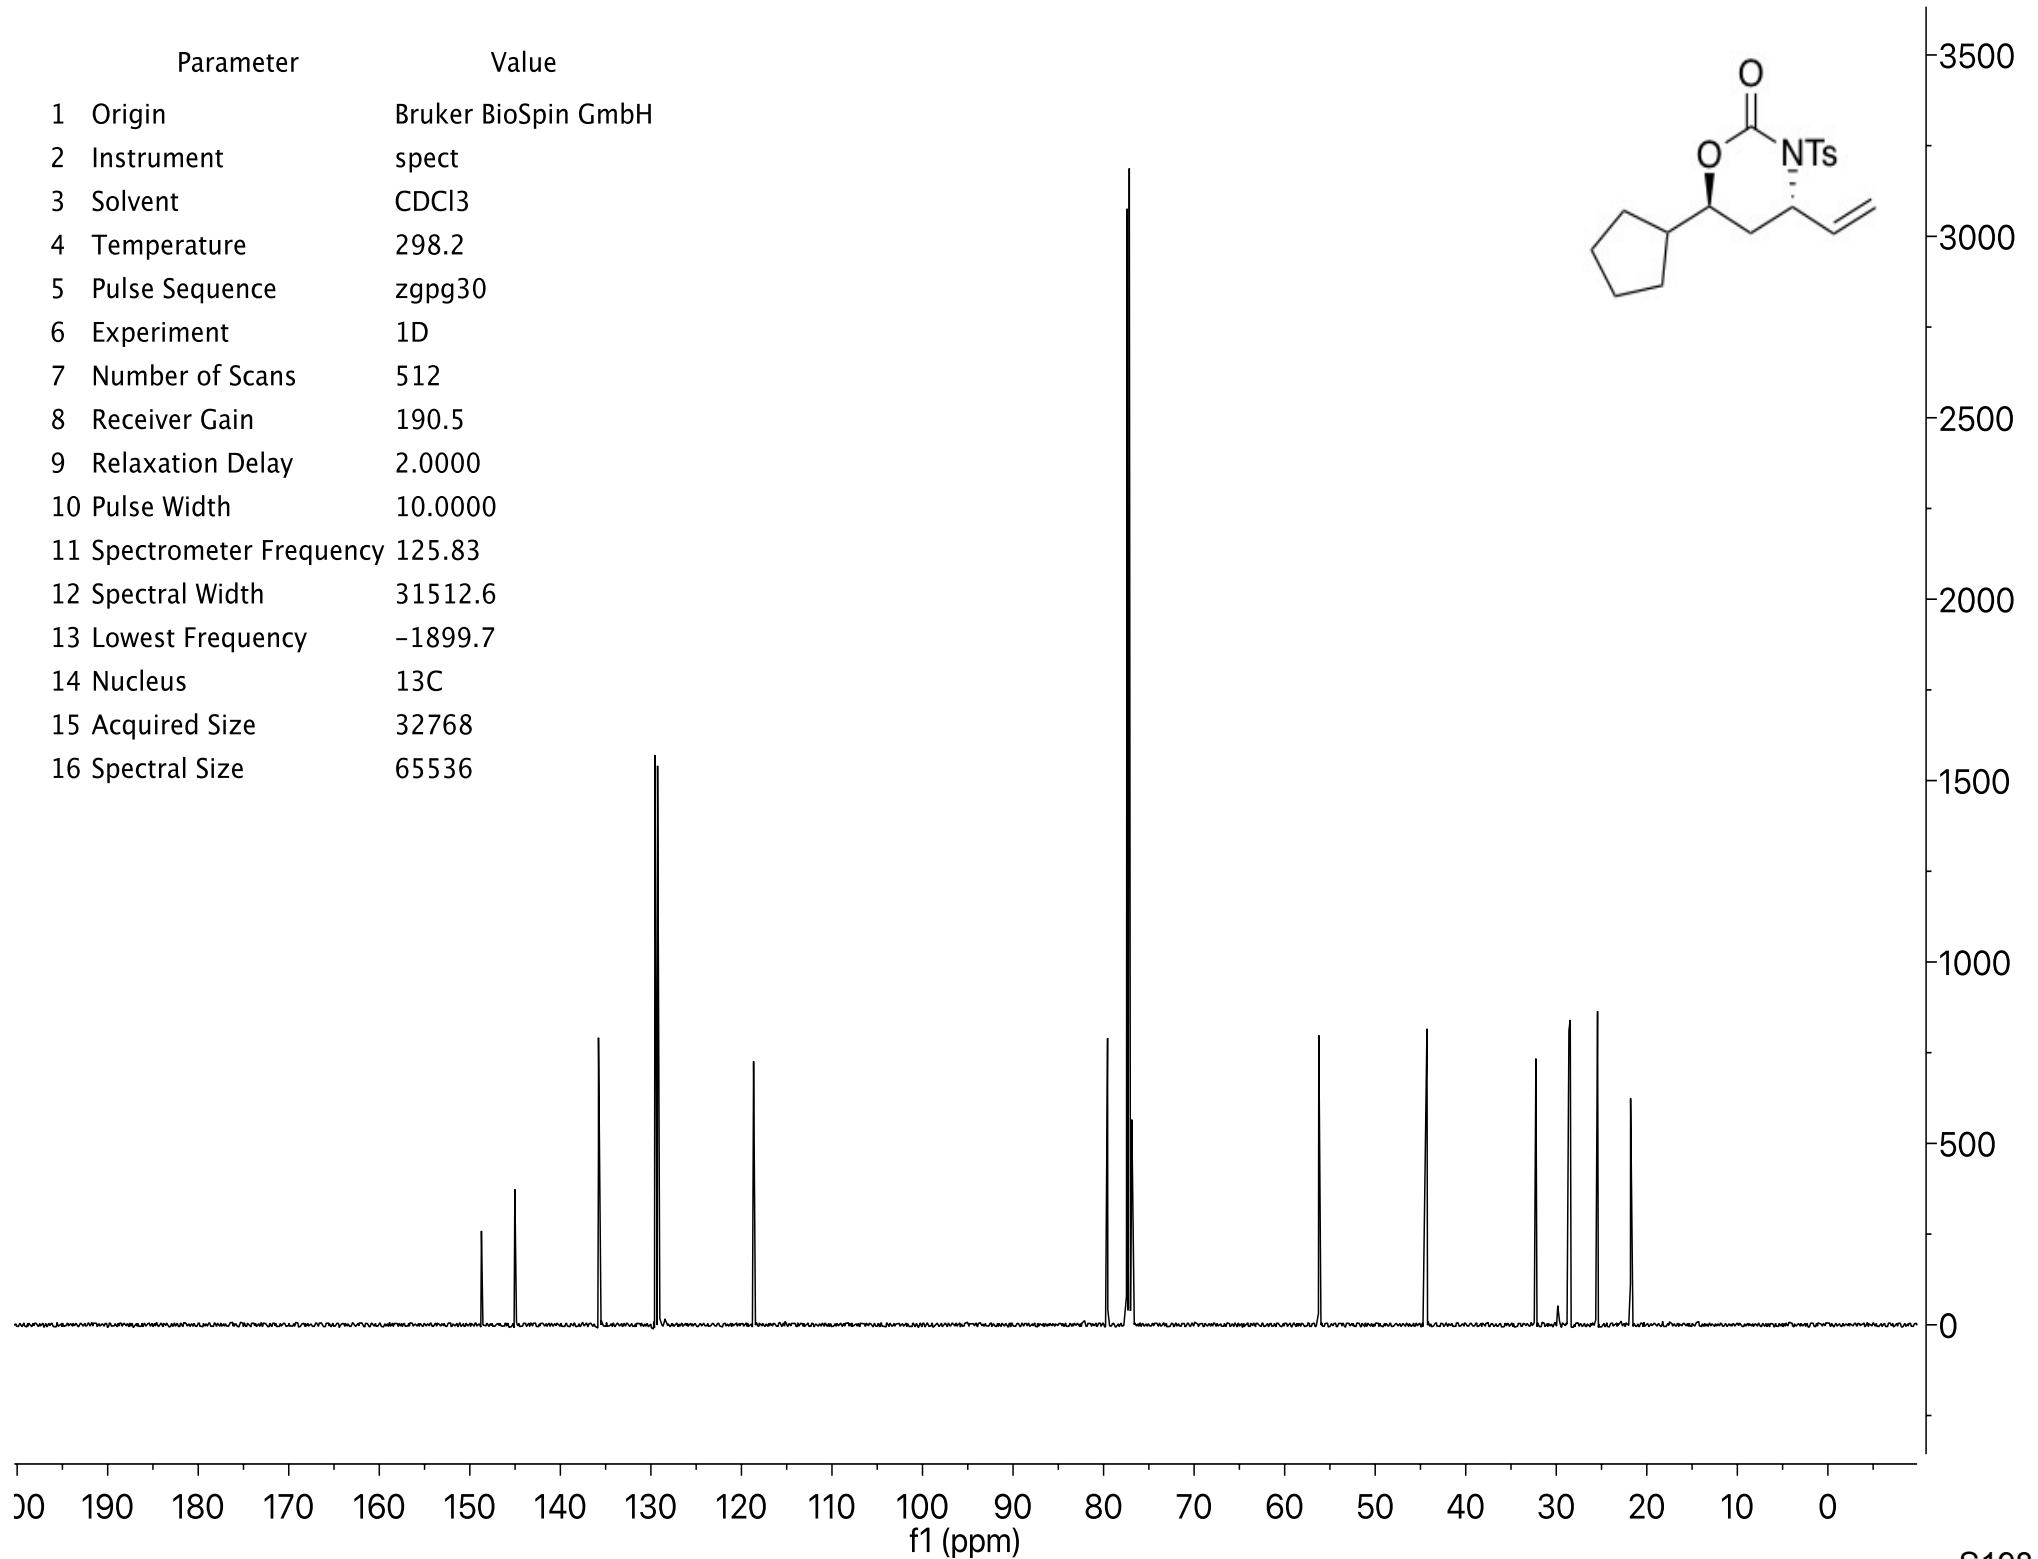



| Parameter                 | Value               |
|---------------------------|---------------------|
| 1 Origin                  | Bruker BioSpin GmbH |
| 2 Instrument              | spect               |
| 3 Solvent                 | CDCl3               |
| 4 Temperature             | 298.2               |
| 5 Pulse Sequence          | zg30                |
| 6 Experiment              | 1D                  |
| 7 Number of Scans         | 5                   |
| 8 Receiver Gain           | 94.3                |
| 9 Relaxation Delay        | 15.0000             |
| 10 Pulse Width            | 12.0000             |
| 11 Spectrometer Frequency | 500.35              |
| 12 Spectral Width         | 10000.0             |
| 13 Lowest Frequency       | -1922.0             |
| 14 Nucleus                | 1H                  |
| 15 Acquired Size          | 32768               |
| 16 Spectral Size          | 65536               |

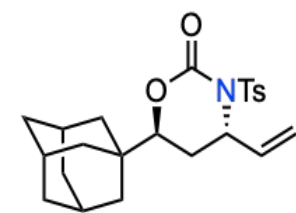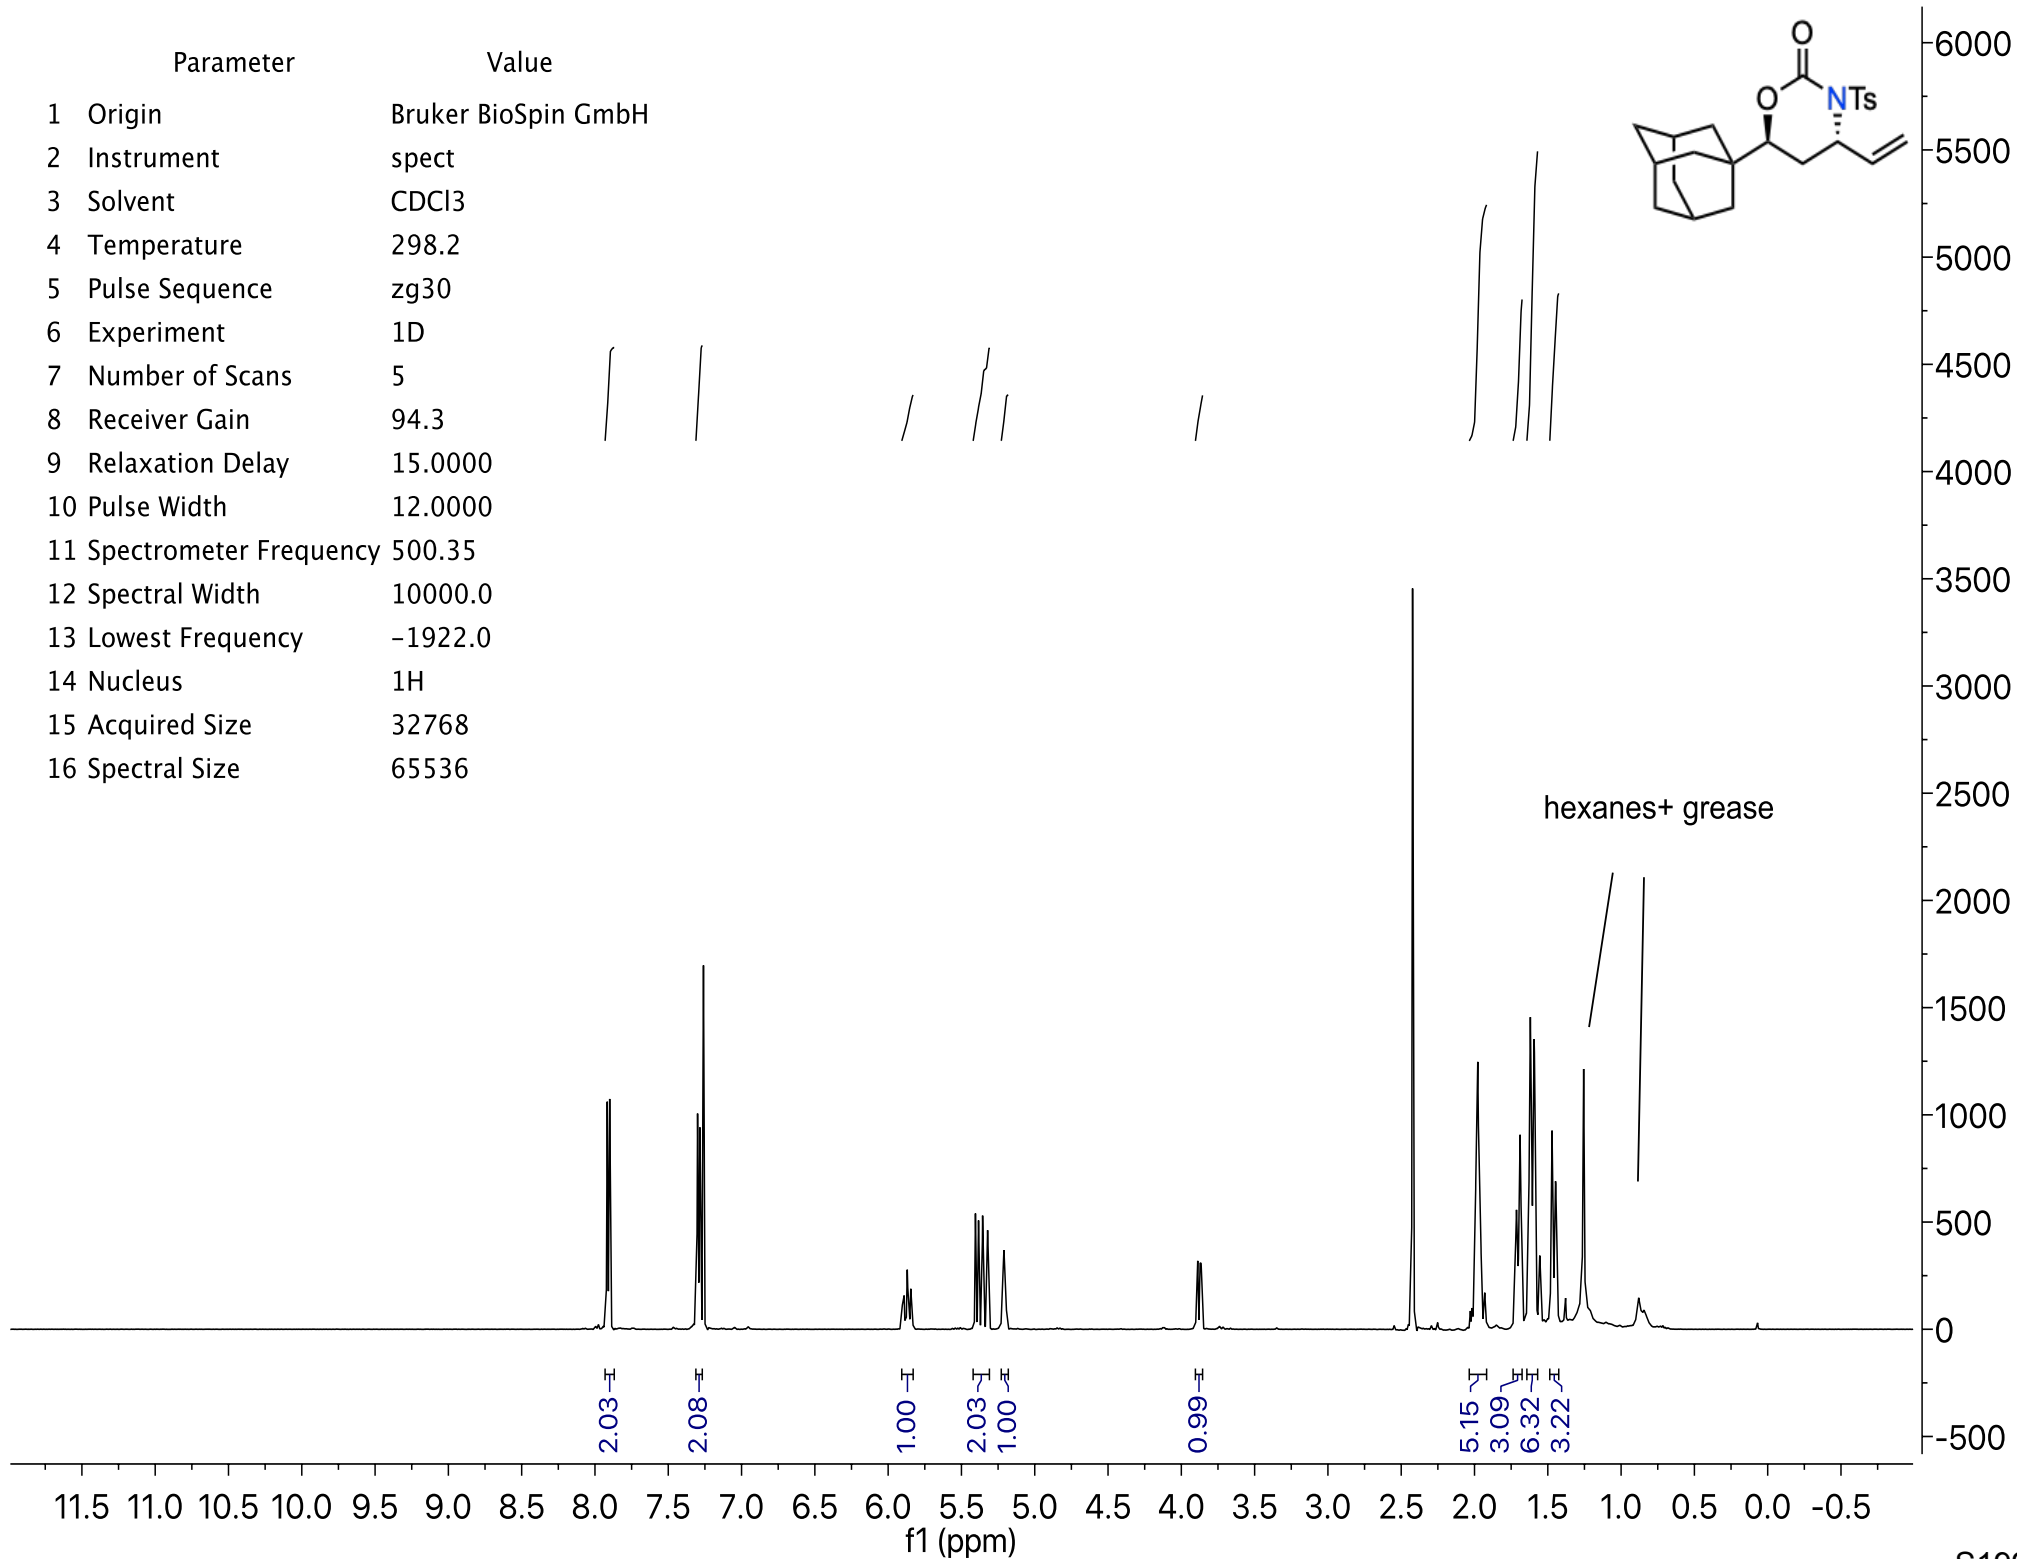

| Parameter                 | Value               |
|---------------------------|---------------------|
| 1 Origin                  | Bruker BioSpin GmbH |
| 2 Instrument              | spect               |
| 3 Solvent                 | CDCl3               |
| 4 Temperature             | 298.1               |
| 5 Pulse Sequence          | zgpg30              |
| 6 Experiment              | 1D                  |
| 7 Number of Scans         | 512                 |
| 8 Receiver Gain           | 190.5               |
| 9 Relaxation Delay        | 1.0000              |
| 10 Pulse Width            | 10.0000             |
| 11 Spectrometer Frequency | 125.83              |
| 12 Spectral Width         | 31512.6             |
| 13 Lowest Frequency       | -1898.6             |
| 14 Nucleus                | 13C                 |
| 15 Acquired Size          | 32768               |
| 16 Spectral Size          | 65536               |

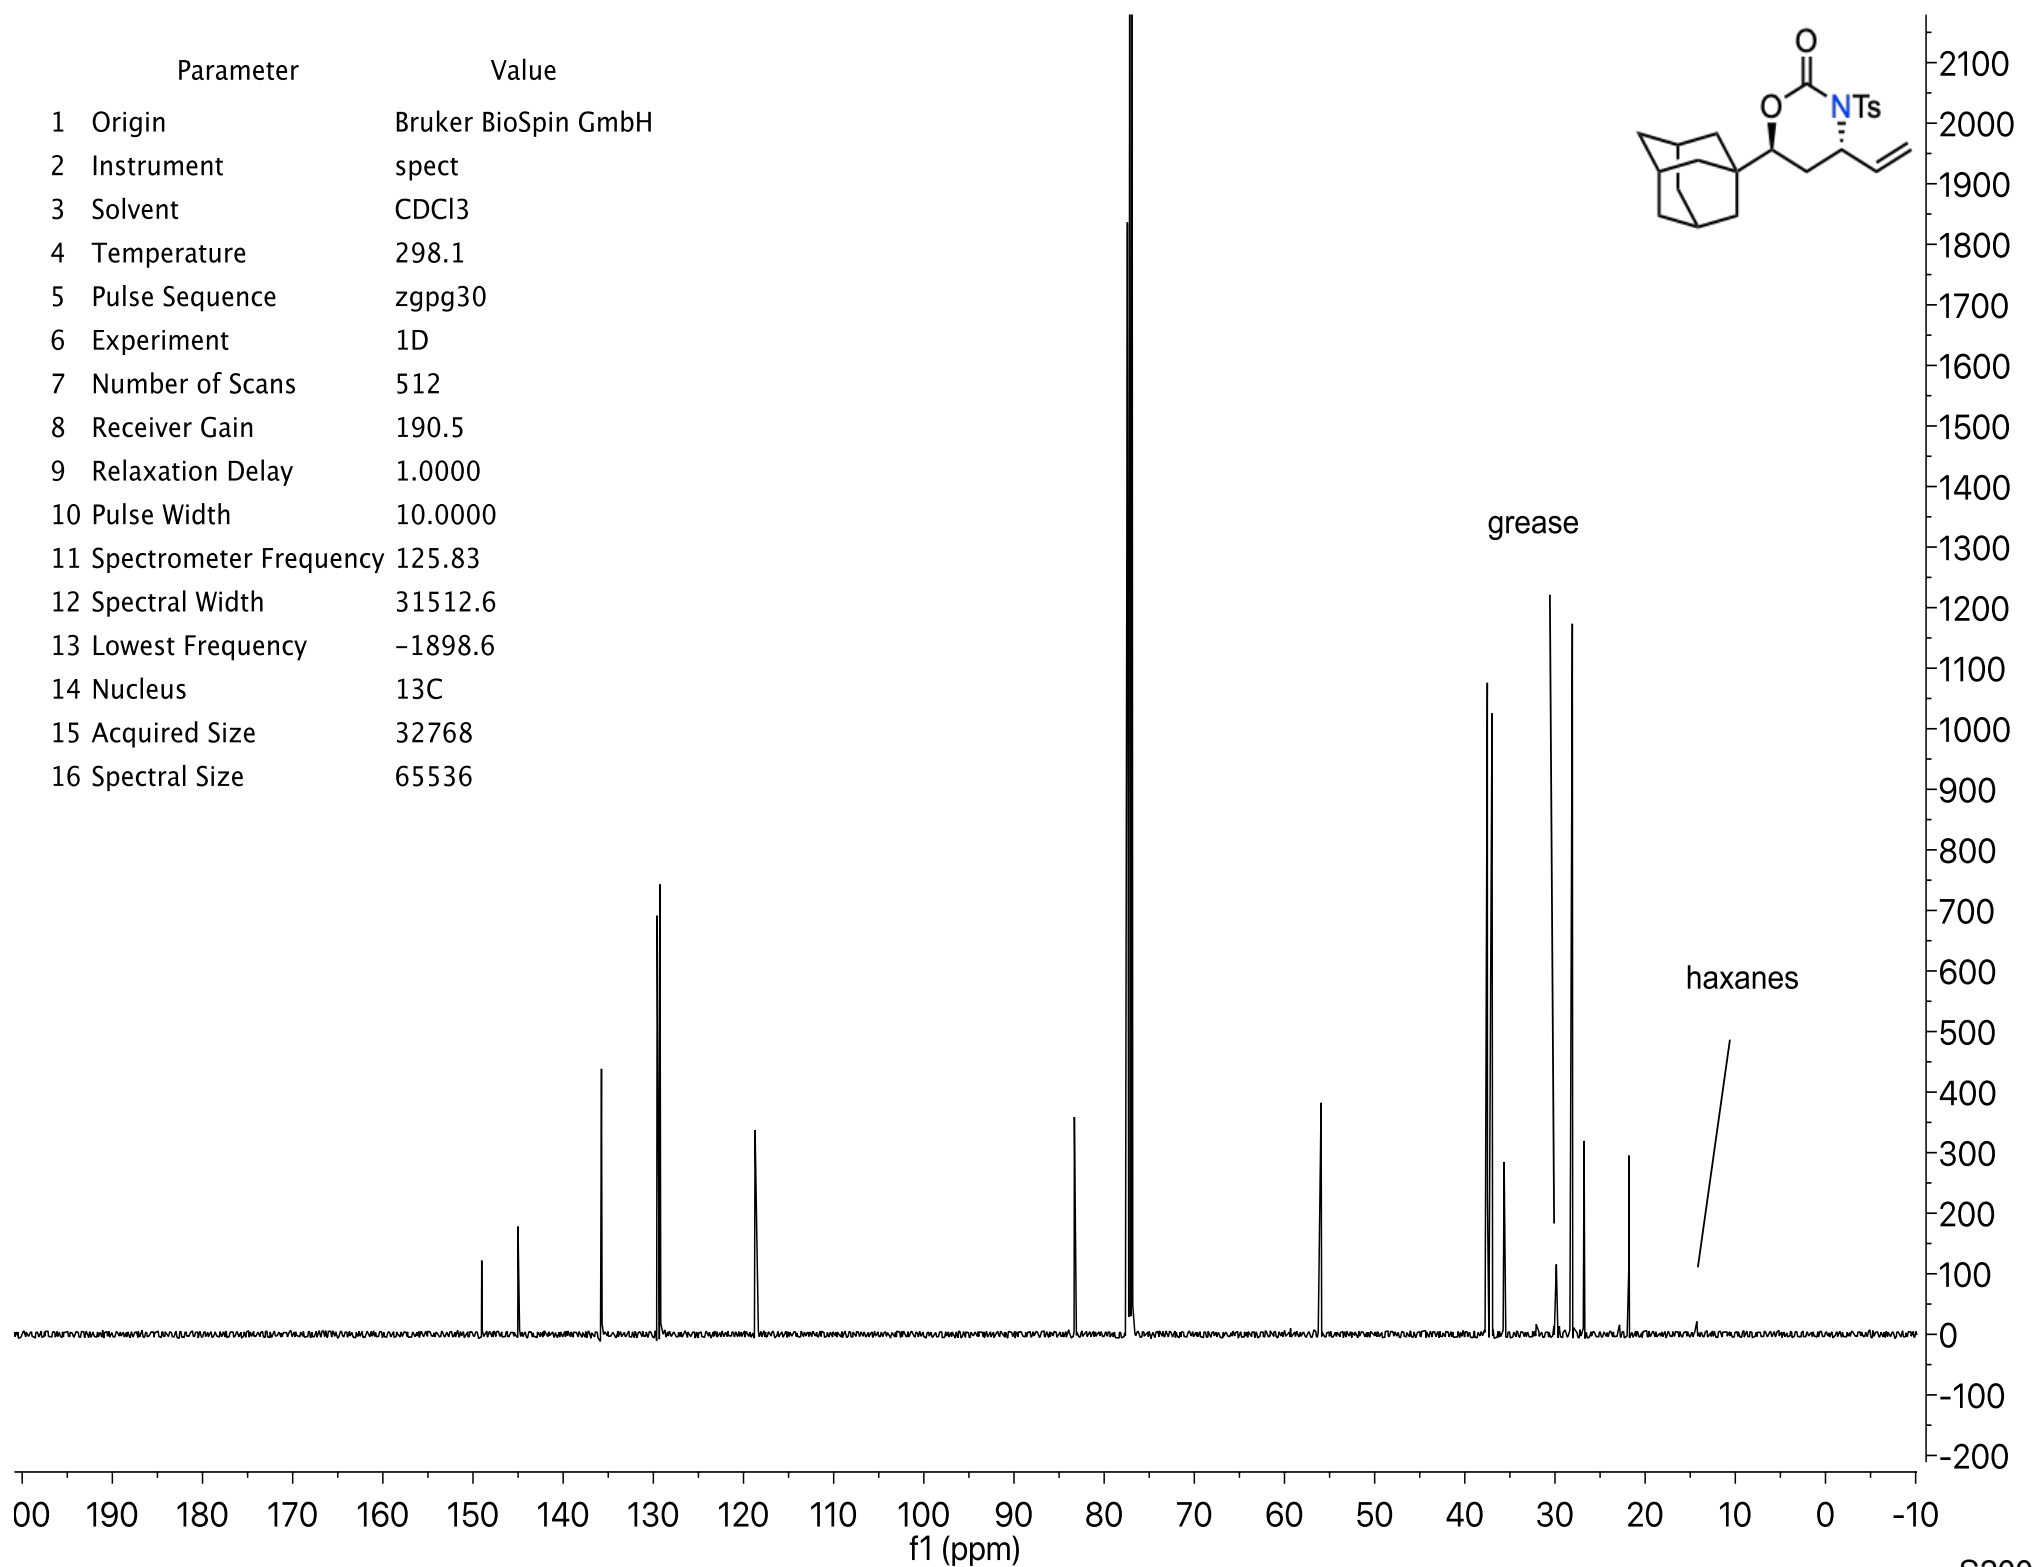

| Parameter                 | Value               |
|---------------------------|---------------------|
| 1 Origin                  | Bruker BioSpin GmbH |
| 2 Spectrometer            | spect               |
| 3 Solvent                 | CDCl3               |
| 4 Temperature             | 296.2               |
| 5 Pulse Sequence          | zg30                |
| 6 Experiment              | 1D                  |
| 7 Number of Scans         | 4                   |
| 8 Receiver Gain           | 30                  |
| 9 Relaxation Delay        | 15.0000             |
| 10 Pulse Width            | 12.0000             |
| 11 Spectrometer Frequency | 500.35              |
| 12 Spectral Width         | 10000.0             |
| 13 Lowest Frequency       | -1922.8             |
| 14 Nucleus                | 1H                  |
| 15 Acquired Size          | 32768               |
| 16 Spectral Size          | 65536               |

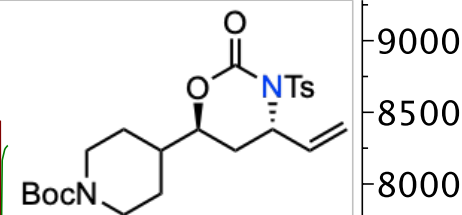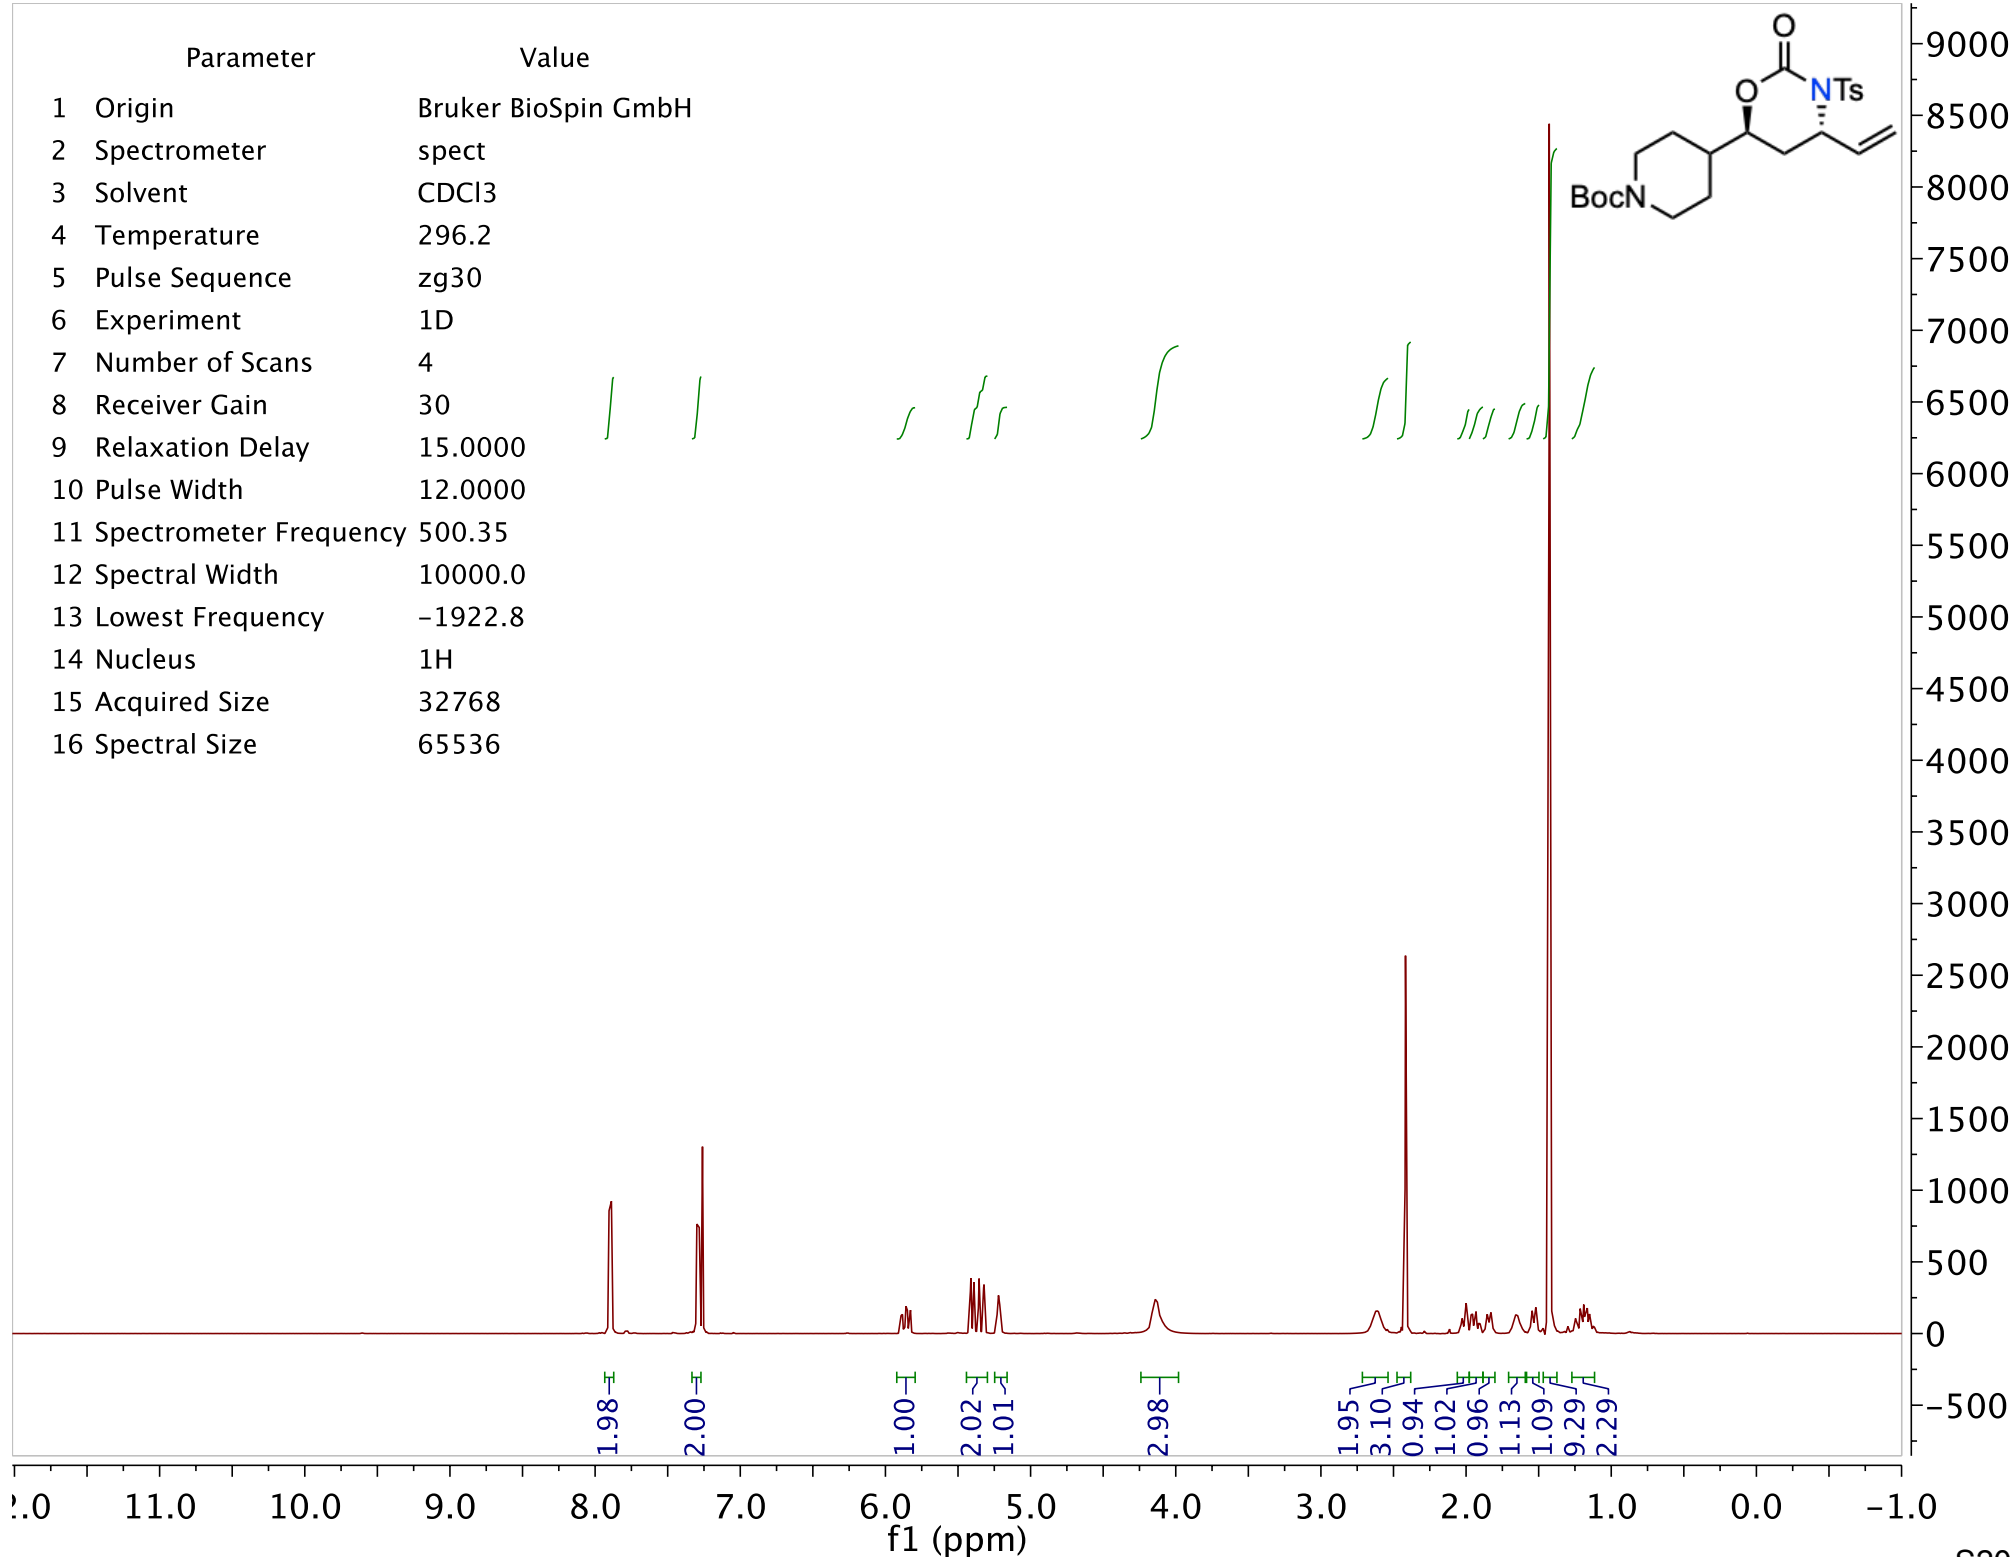

| Parameter                 | Value               |
|---------------------------|---------------------|
| 1 Origin                  | Bruker BioSpin GmbH |
| 2 Spectrometer            | spect               |
| 3 Solvent                 | CDCl3               |
| 4 Temperature             | 296.2               |
| 5 Pulse Sequence          | zgpg30              |
| 6 Experiment              | 1D                  |
| 7 Number of Scans         | 800                 |
| 8 Receiver Gain           | 191                 |
| 9 Relaxation Delay        | 1.0000              |
| 10 Pulse Width            | 10.0000             |
| 11 Spectrometer Frequency | 125.83              |
| 12 Spectral Width         | 31512.6             |
| 13 Lowest Frequency       | -1903.1             |
| 14 Nucleus                | 13C                 |
| 15 Acquired Size          | 32768               |
| 16 Spectral Size          | 65536               |

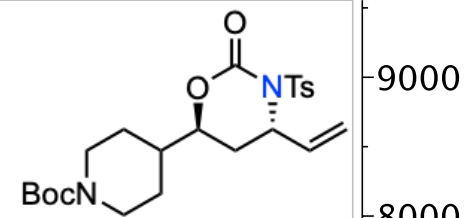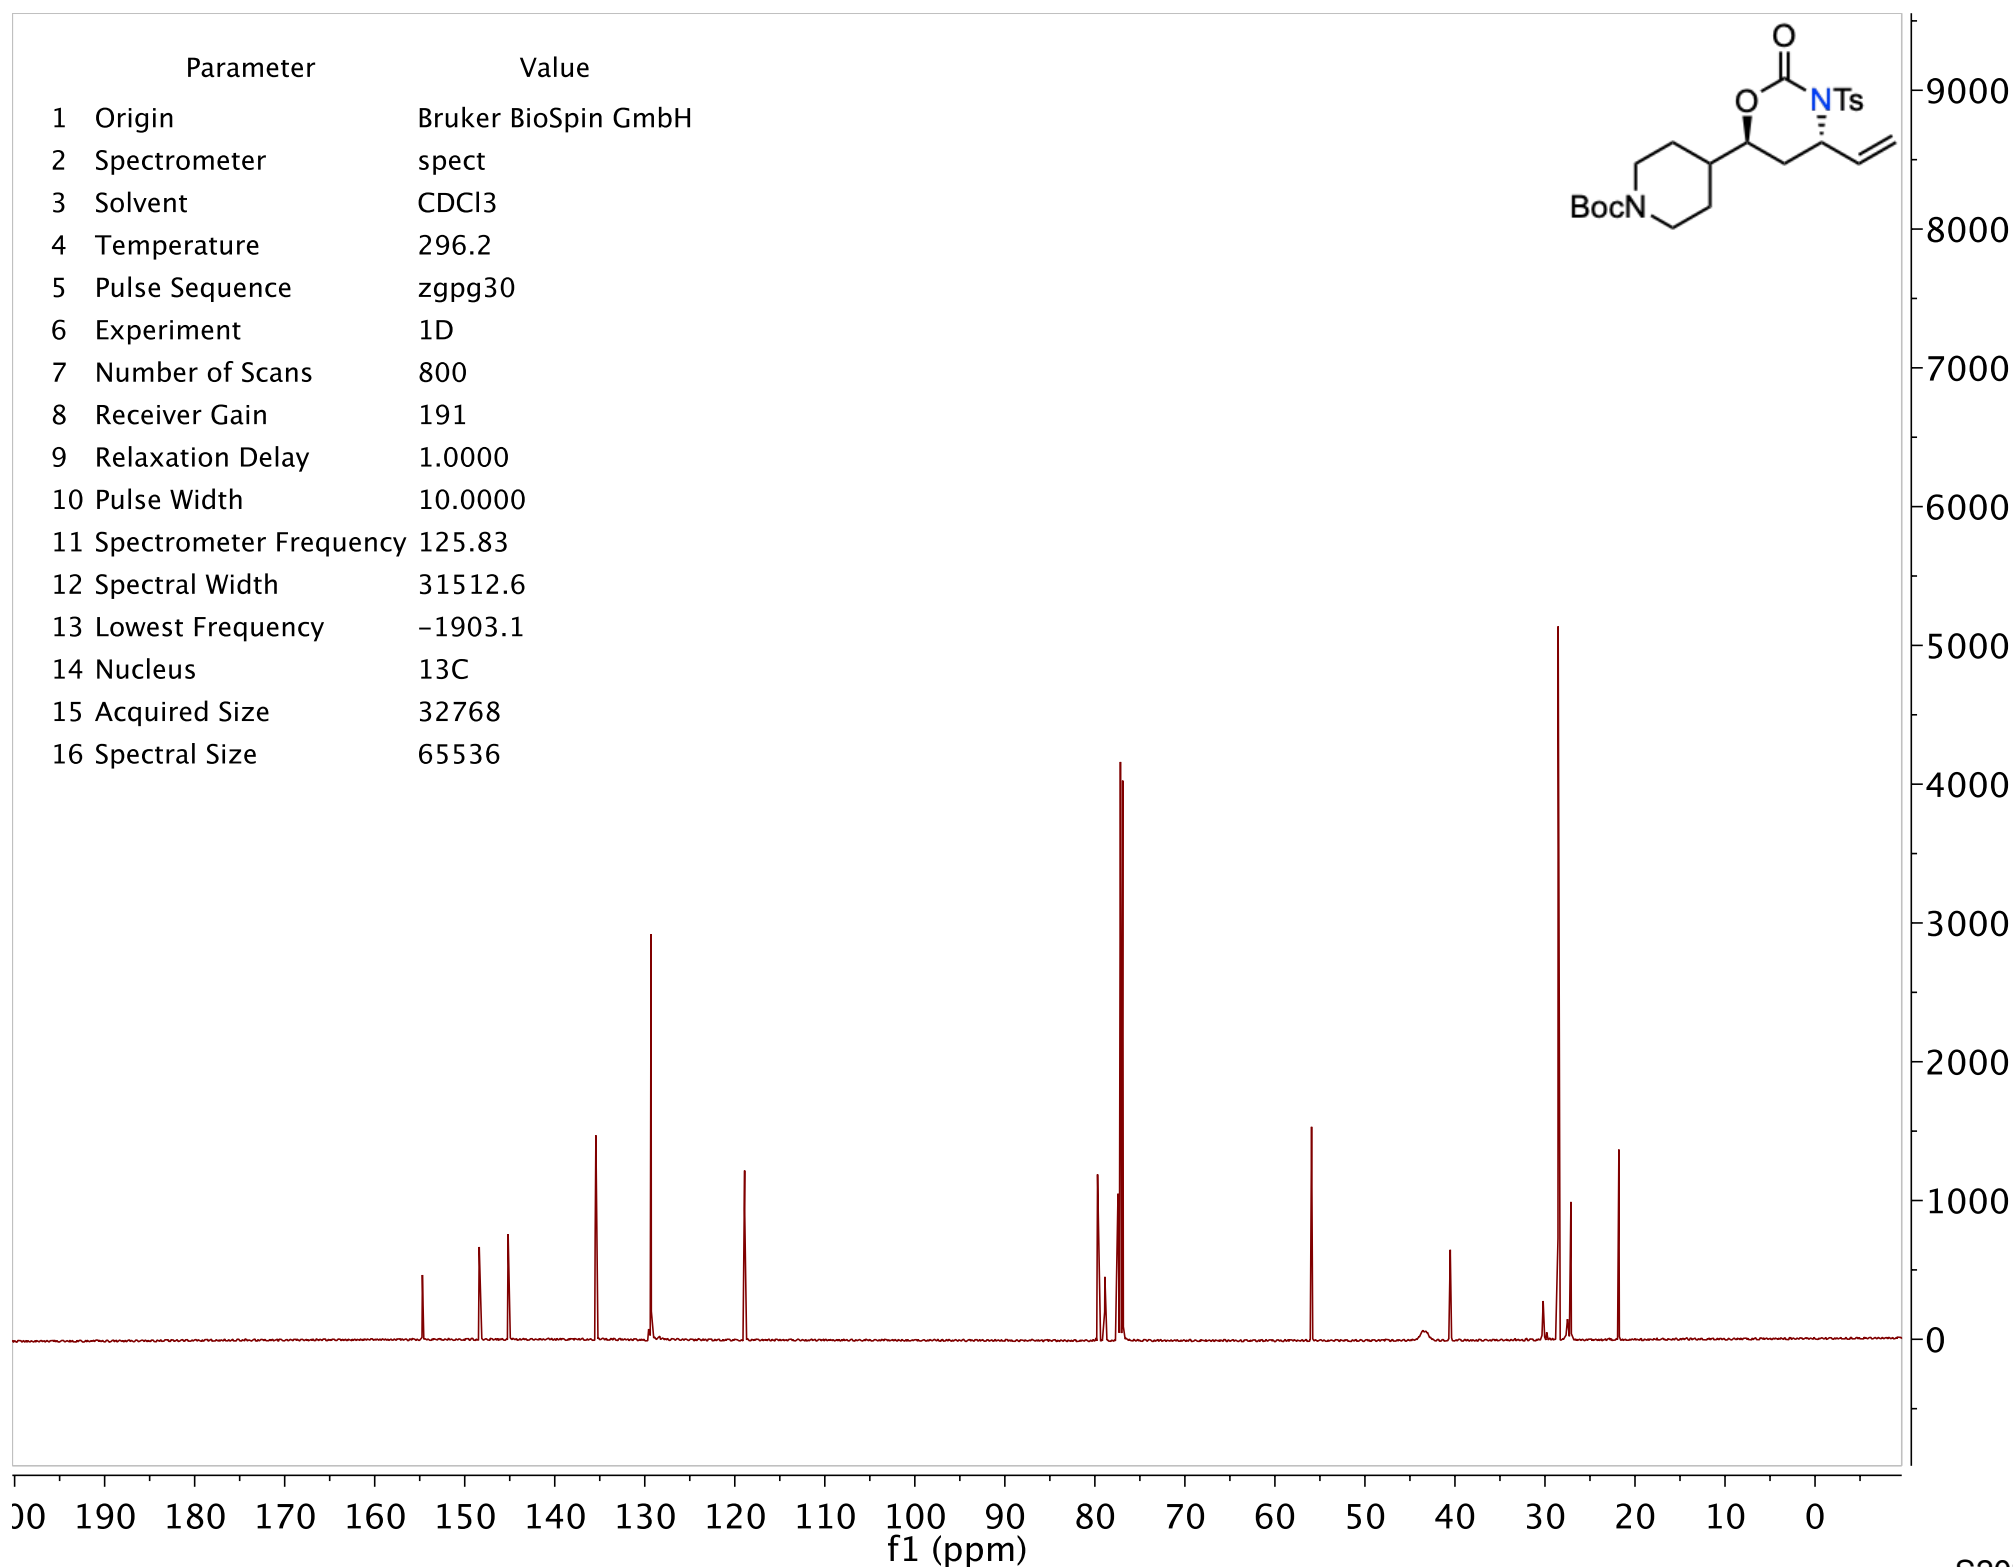

| Parameter                 | Value               |
|---------------------------|---------------------|
| 1 Origin                  | Bruker BioSpin GmbH |
| 2 Instrument              | spect               |
| 3 Solvent                 | CDCl3               |
| 4 Temperature             | 289.3               |
| 5 Pulse Sequence          | zg30                |
| 6 Experiment              | 1D                  |
| 7 Number of Scans         | 16                  |
| 8 Receiver Gain           | 19.2                |
| 9 Relaxation Delay        | 15.0000             |
| 10 Pulse Width            | 12.0000             |
| 11 Spectrometer Frequency | 500.35              |
| 12 Spectral Width         | 10000.0             |
| 13 Lowest Frequency       | -1921.4             |
| 14 Nucleus                | 1H                  |
| 15 Acquired Size          | 32768               |
| 16 Spectral Size          | 65536               |

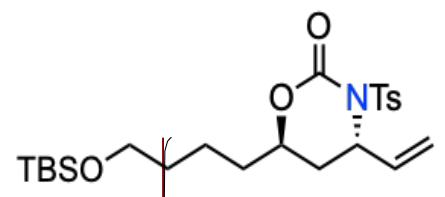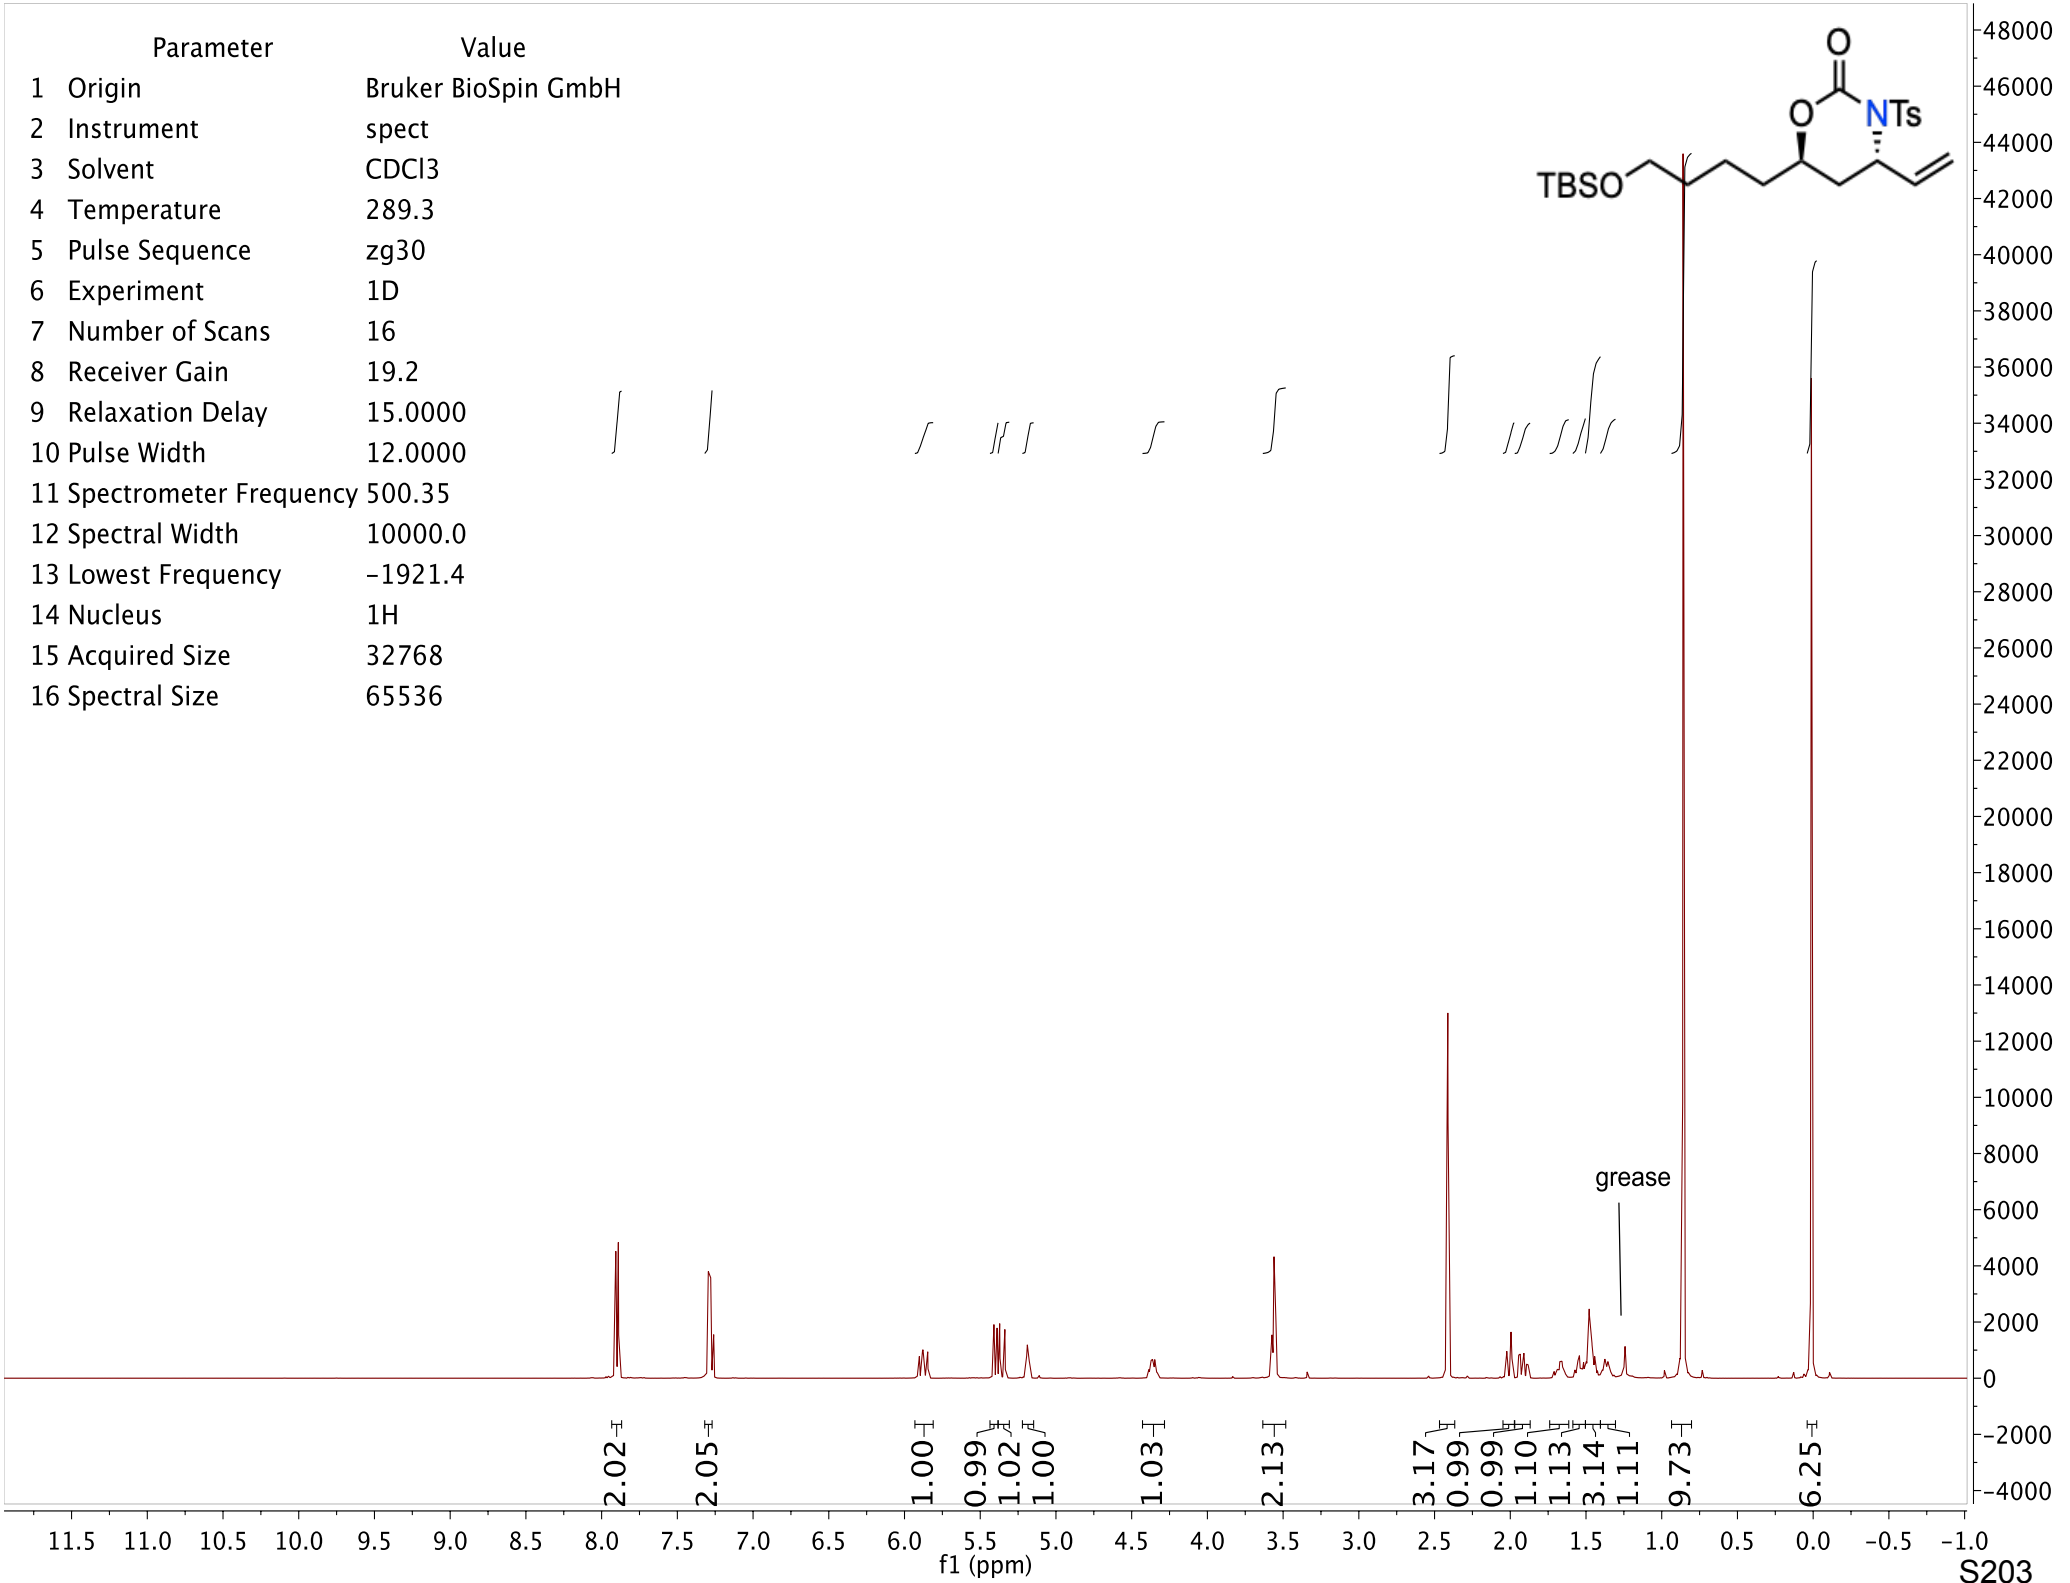

| Parameter                 | Value               |
|---------------------------|---------------------|
| 1 Origin                  | Bruker BioSpin GmbH |
| 2 Instrument              | spect               |
| 3 Solvent                 | CDCl3               |
| 4 Temperature             | 289.3               |
| 5 Pulse Sequence          | zgpg30              |
| 6 Experiment              | 1D                  |
| 7 Number of Scans         | 256                 |
| 8 Receiver Gain           | 190.5               |
| 9 Relaxation Delay        | 2.0000              |
| 10 Pulse Width            | 10.0000             |
| 11 Spectrometer Frequency | 125.83              |
| 12 Spectral Width         | 31512.6             |
| 13 Lowest Frequency       | -1907.2             |
| 14 Nucleus                | 13C                 |
| 15 Acquired Size          | 32768               |
| 16 Spectral Size          | 65536               |

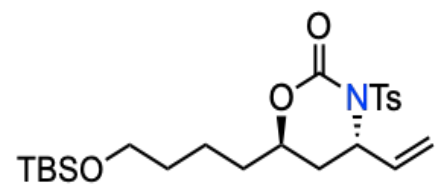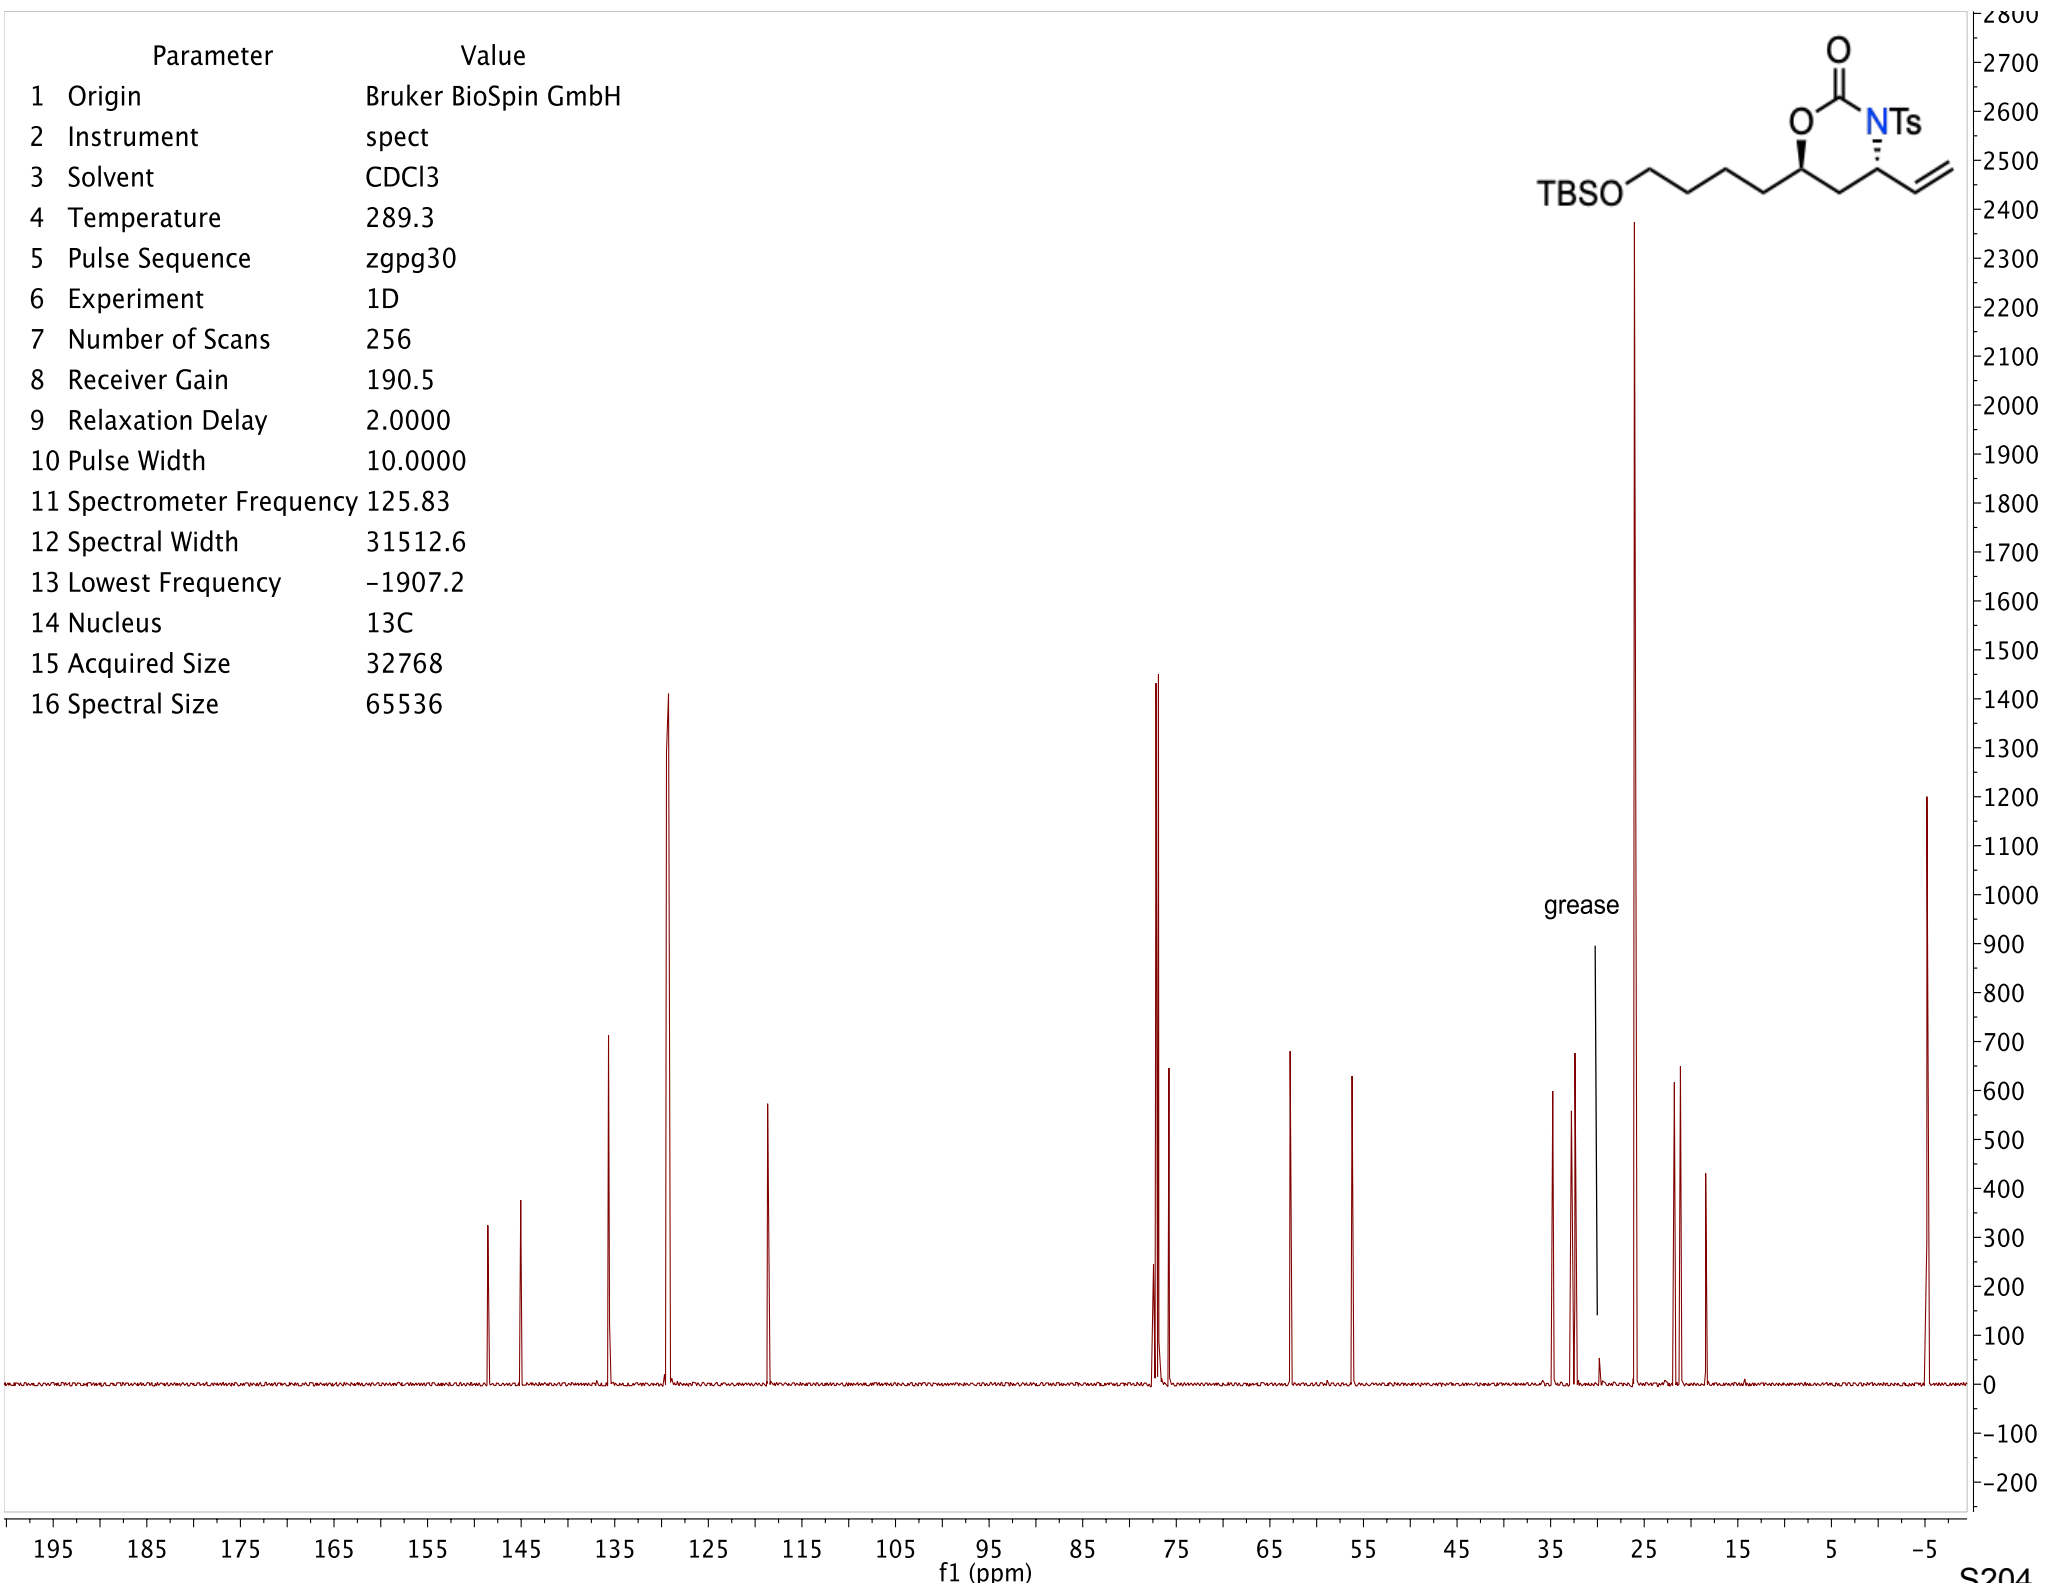

| Parameter                 | Value               |
|---------------------------|---------------------|
| 1 Origin                  | Bruker BioSpin GmbH |
| 2 Instrument              | spect               |
| 3 Solvent                 | CDCl3               |
| 4 Temperature             | 298.2               |
| 5 Pulse Sequence          | zg30                |
| 6 Experiment              | 1D                  |
| 7 Number of Scans         | 16                  |
| 8 Receiver Gain           | 76.2                |
| 9 Relaxation Delay        | 15.0000             |
| 10 Pulse Width            | 12.0000             |
| 11 Spectrometer Frequency | 500.35              |
| 12 Spectral Width         | 10000.0             |
| 13 Lowest Frequency       | -1922.3             |
| 14 Nucleus                | 1H                  |
| 15 Acquired Size          | 32768               |
| 16 Spectral Size          | 65536               |

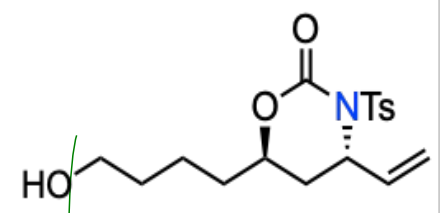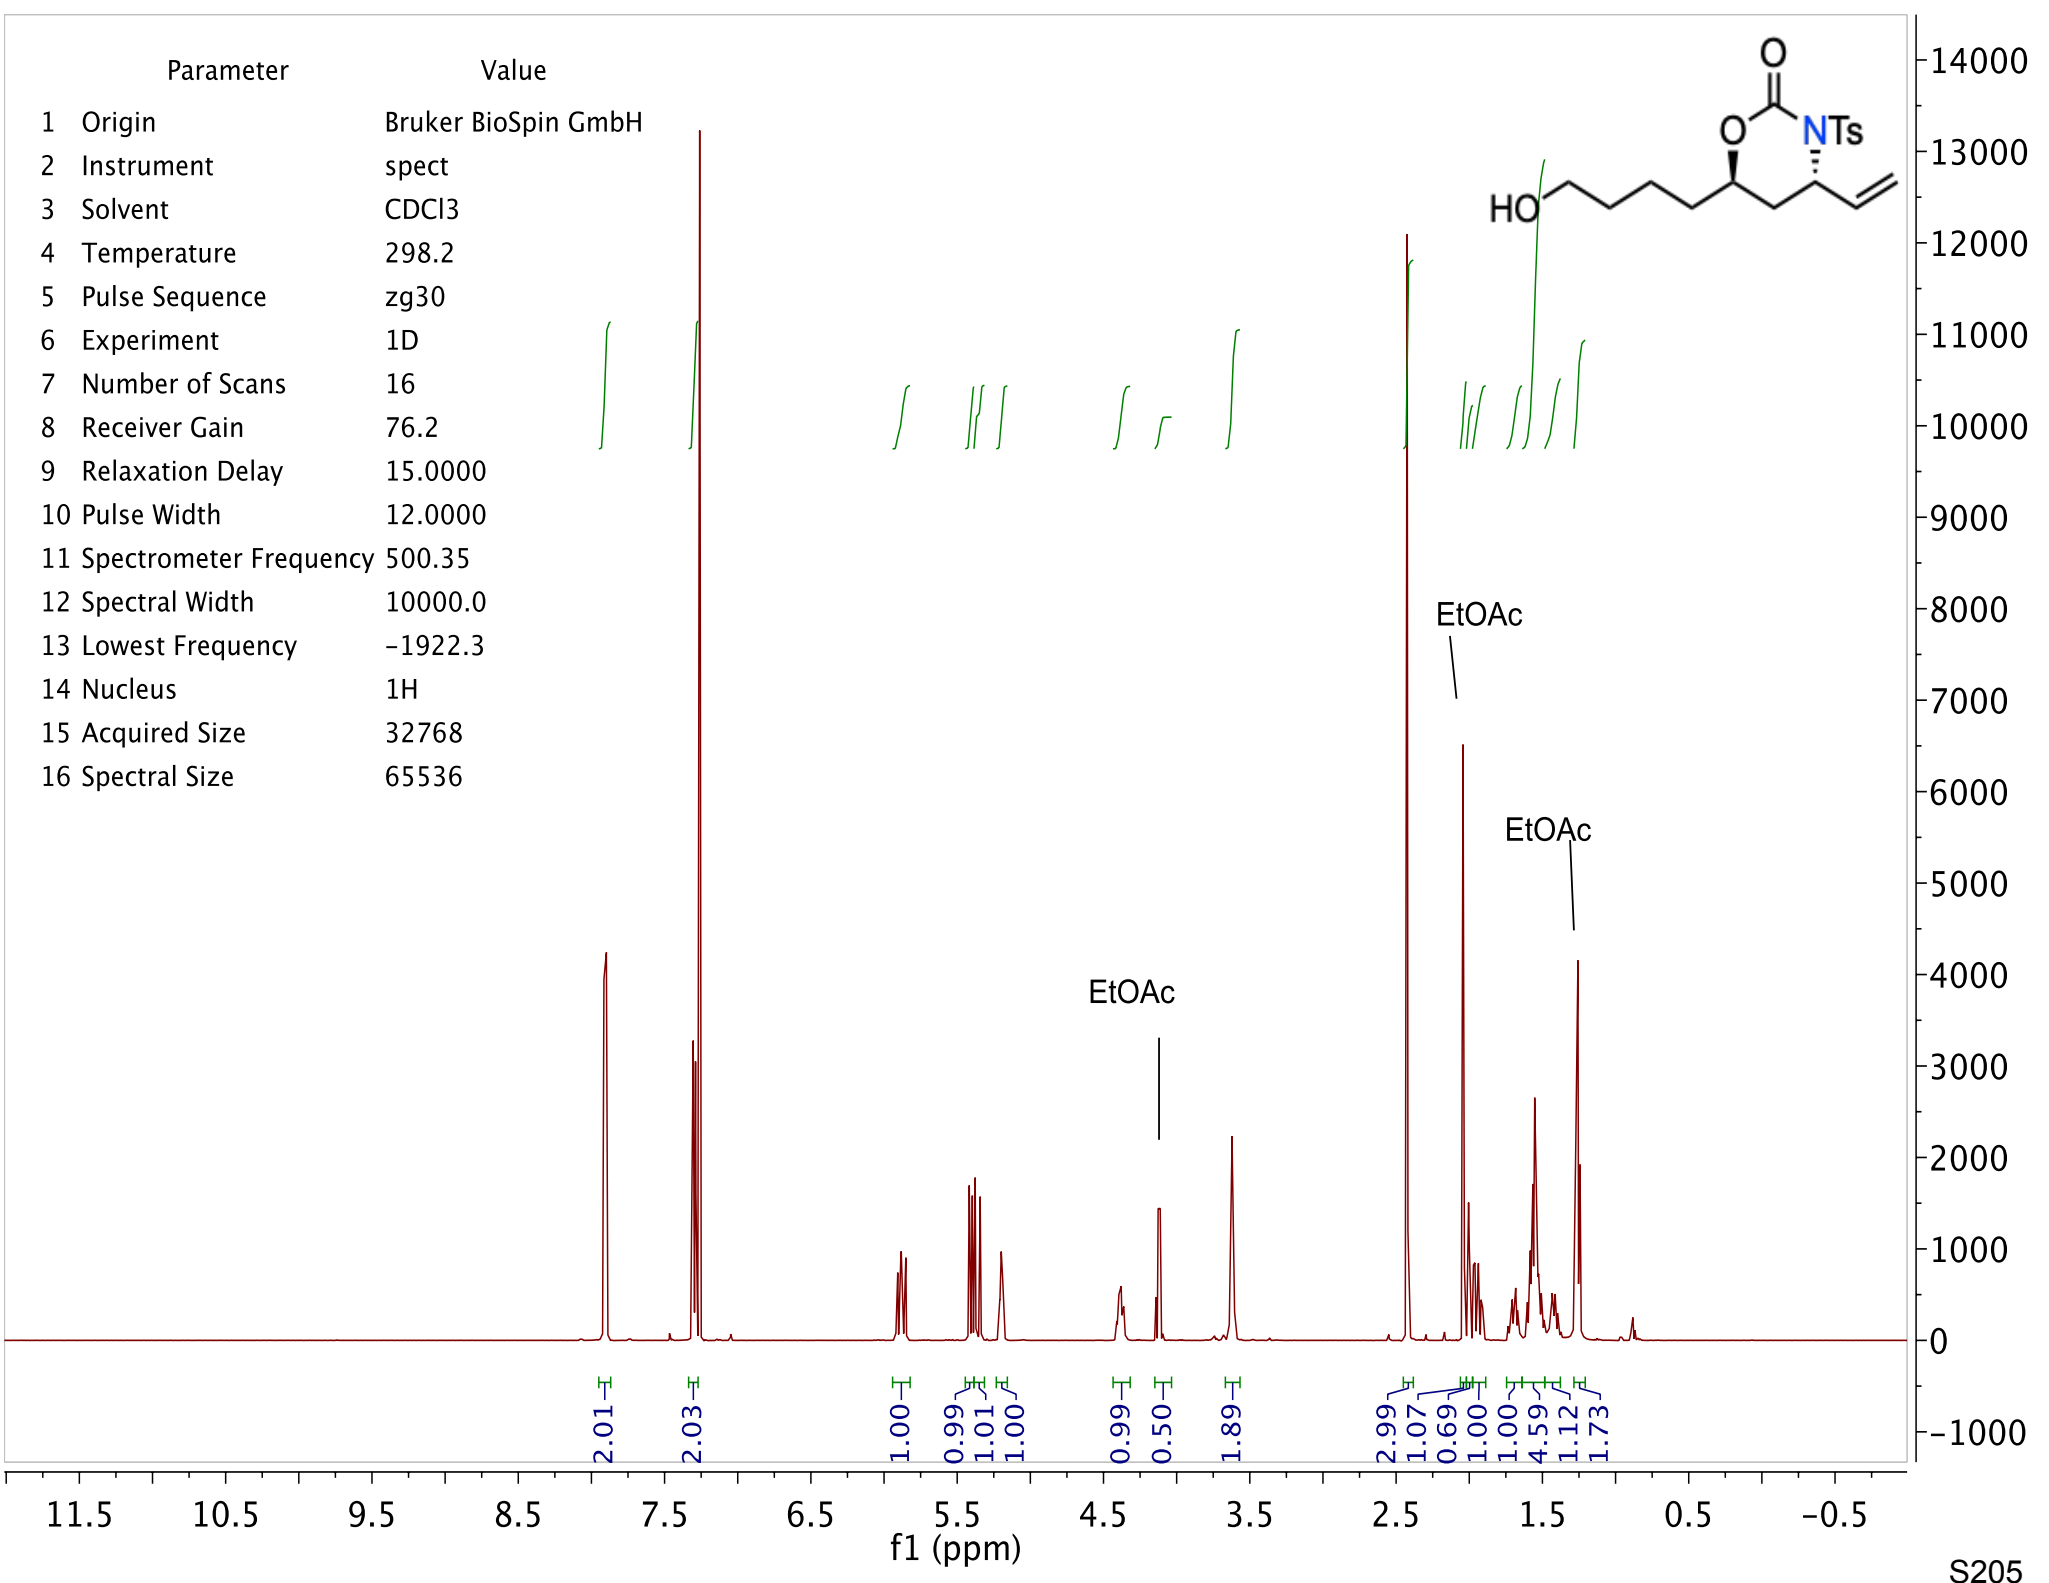

| Parameter                 | Value               |
|---------------------------|---------------------|
| 1 Origin                  | Bruker BioSpin GmbH |
| 2 Instrument              | spect               |
| 3 Solvent                 | CDCl3               |
| 4 Temperature             | 298.2               |
| 5 Pulse Sequence          | zgpg30              |
| 6 Experiment              | 1D                  |
| 7 Number of Scans         | 256                 |
| 8 Receiver Gain           | 190.5               |
| 9 Relaxation Delay        | 2.0000              |
| 10 Pulse Width            | 10.0000             |
| 11 Spectrometer Frequency | 125.83              |
| 12 Spectral Width         | 31512.6             |
| 13 Lowest Frequency       | -1916.9             |
| 14 Nucleus                | 13C                 |
| 15 Acquired Size          | 32768               |
| 16 Spectral Size          | 65536               |

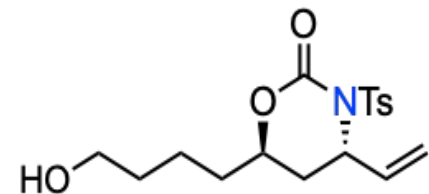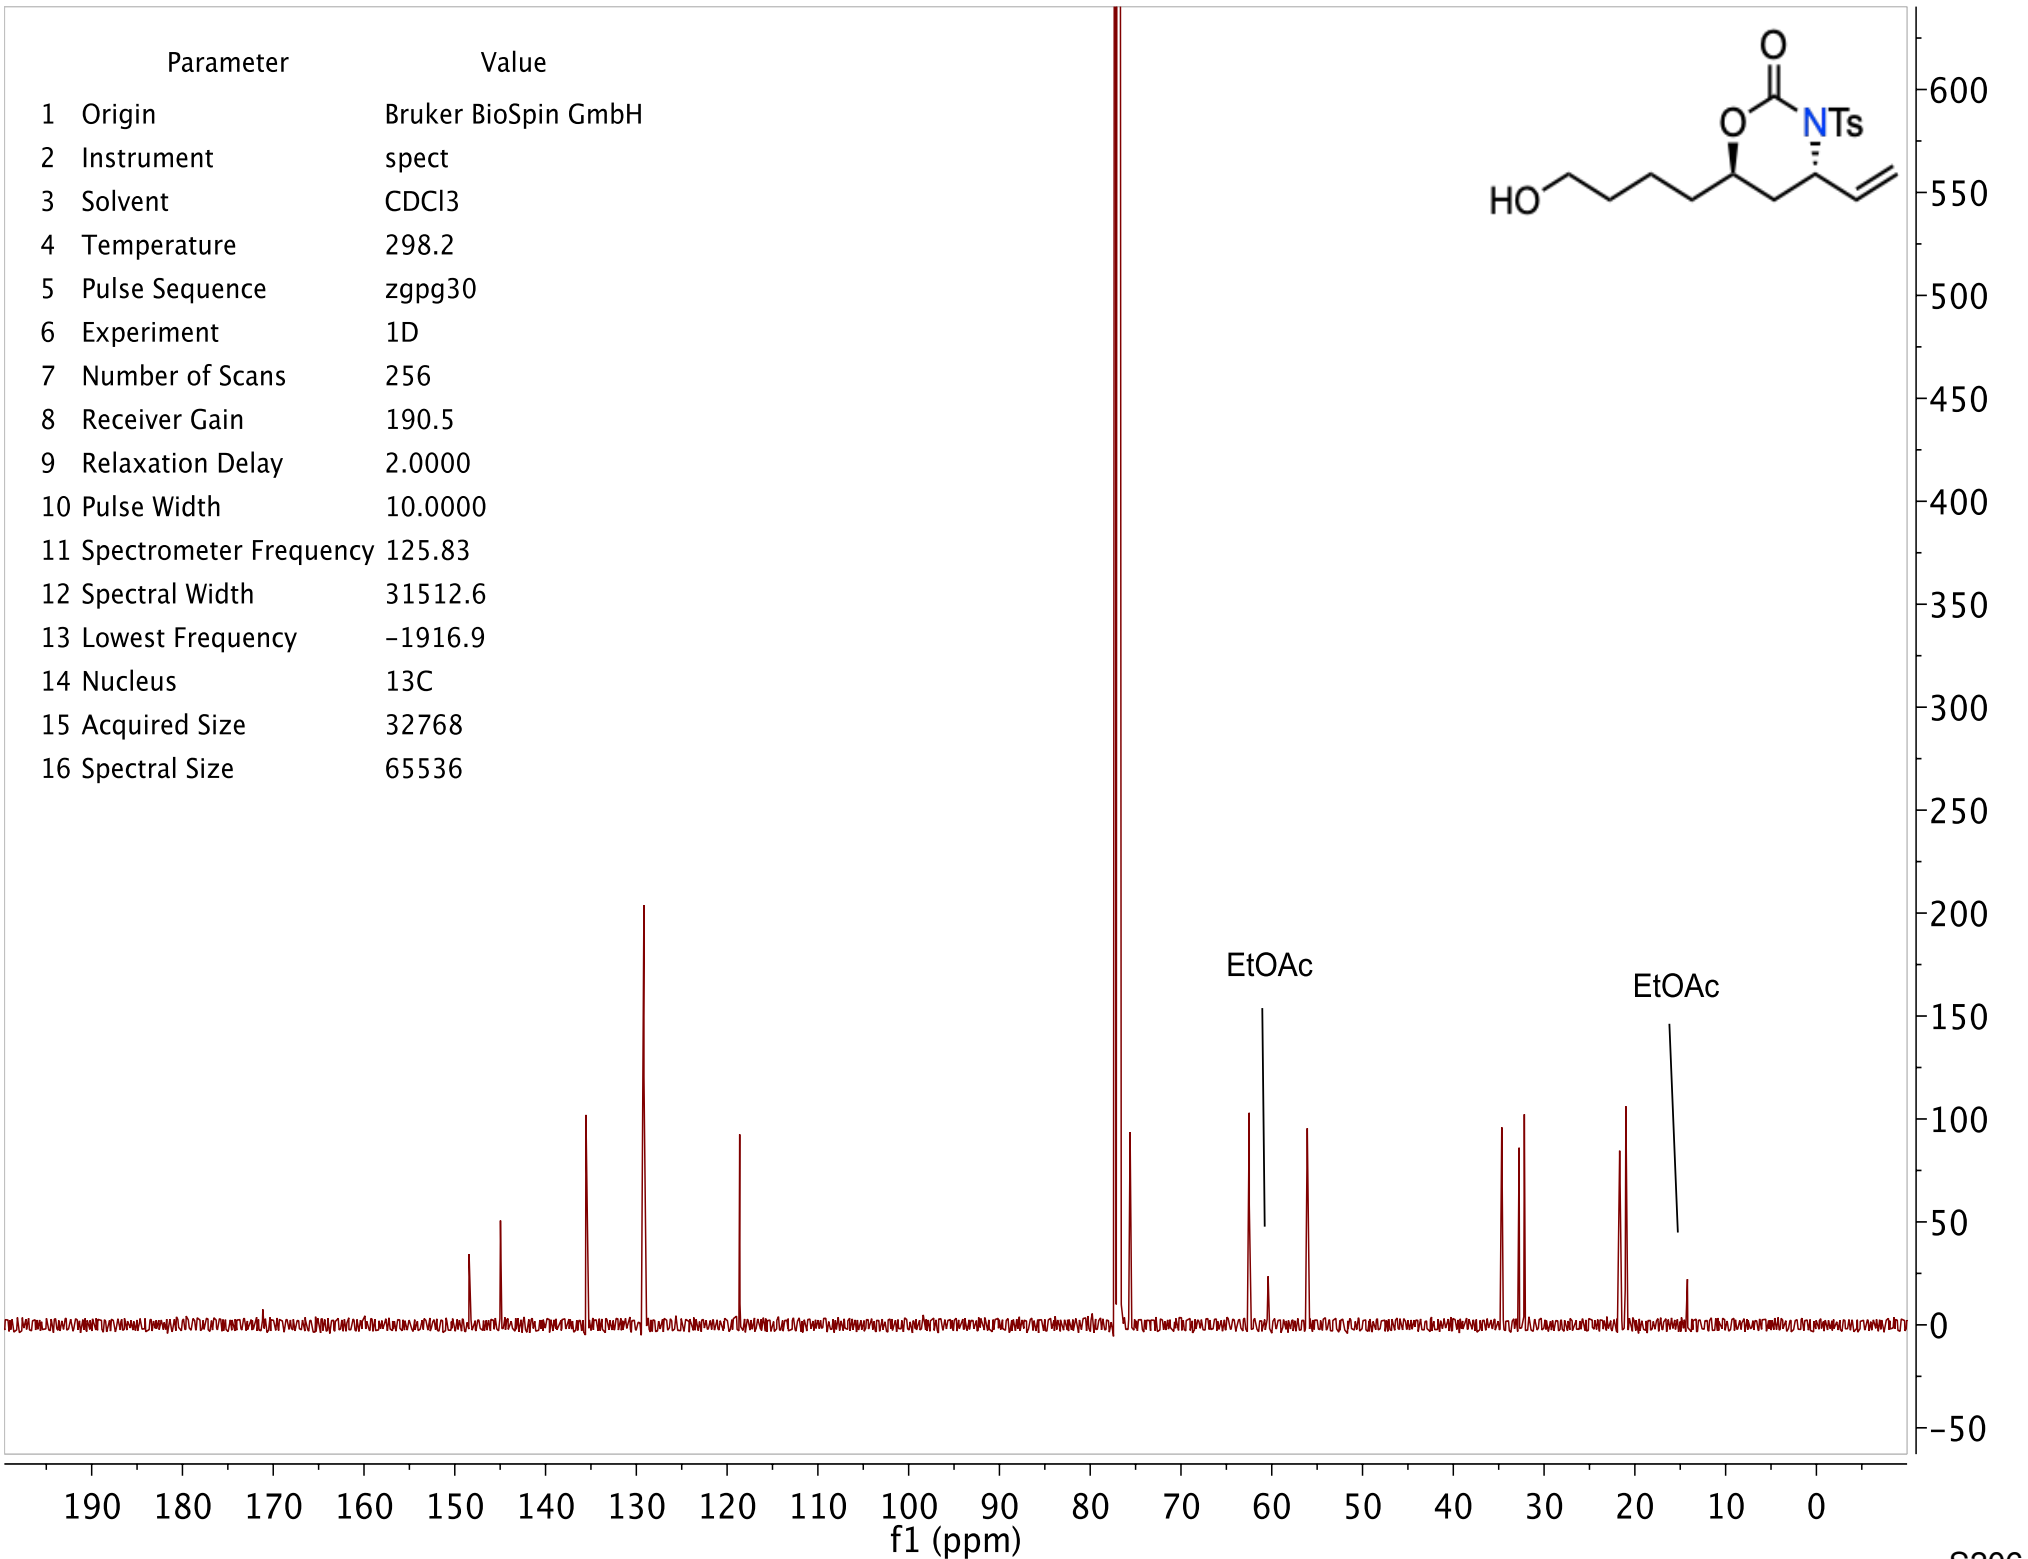



| Parameter                 | Value               |
|---------------------------|---------------------|
| 1 Origin                  | Bruker BioSpin GmbH |
| 2 Instrument              | spect               |
| 3 Solvent                 | CDCl3               |
| 4 Temperature             | 298.0               |
| 5 Pulse Sequence          | zg30                |
| 6 Experiment              | 1D                  |
| 7 Number of Scans         | 16                  |
| 8 Receiver Gain           | 29.7                |
| 9 Relaxation Delay        | 15.0000             |
| 10 Pulse Width            | 12.0000             |
| 11 Spectrometer Frequency | 500.35              |
| 12 Spectral Width         | 10000.0             |
| 13 Lowest Frequency       | -1915.3             |
| 14 Nucleus                | 1H                  |
| 15 Acquired Size          | 32768               |
| 16 Spectral Size          | 65536               |

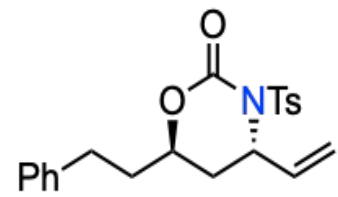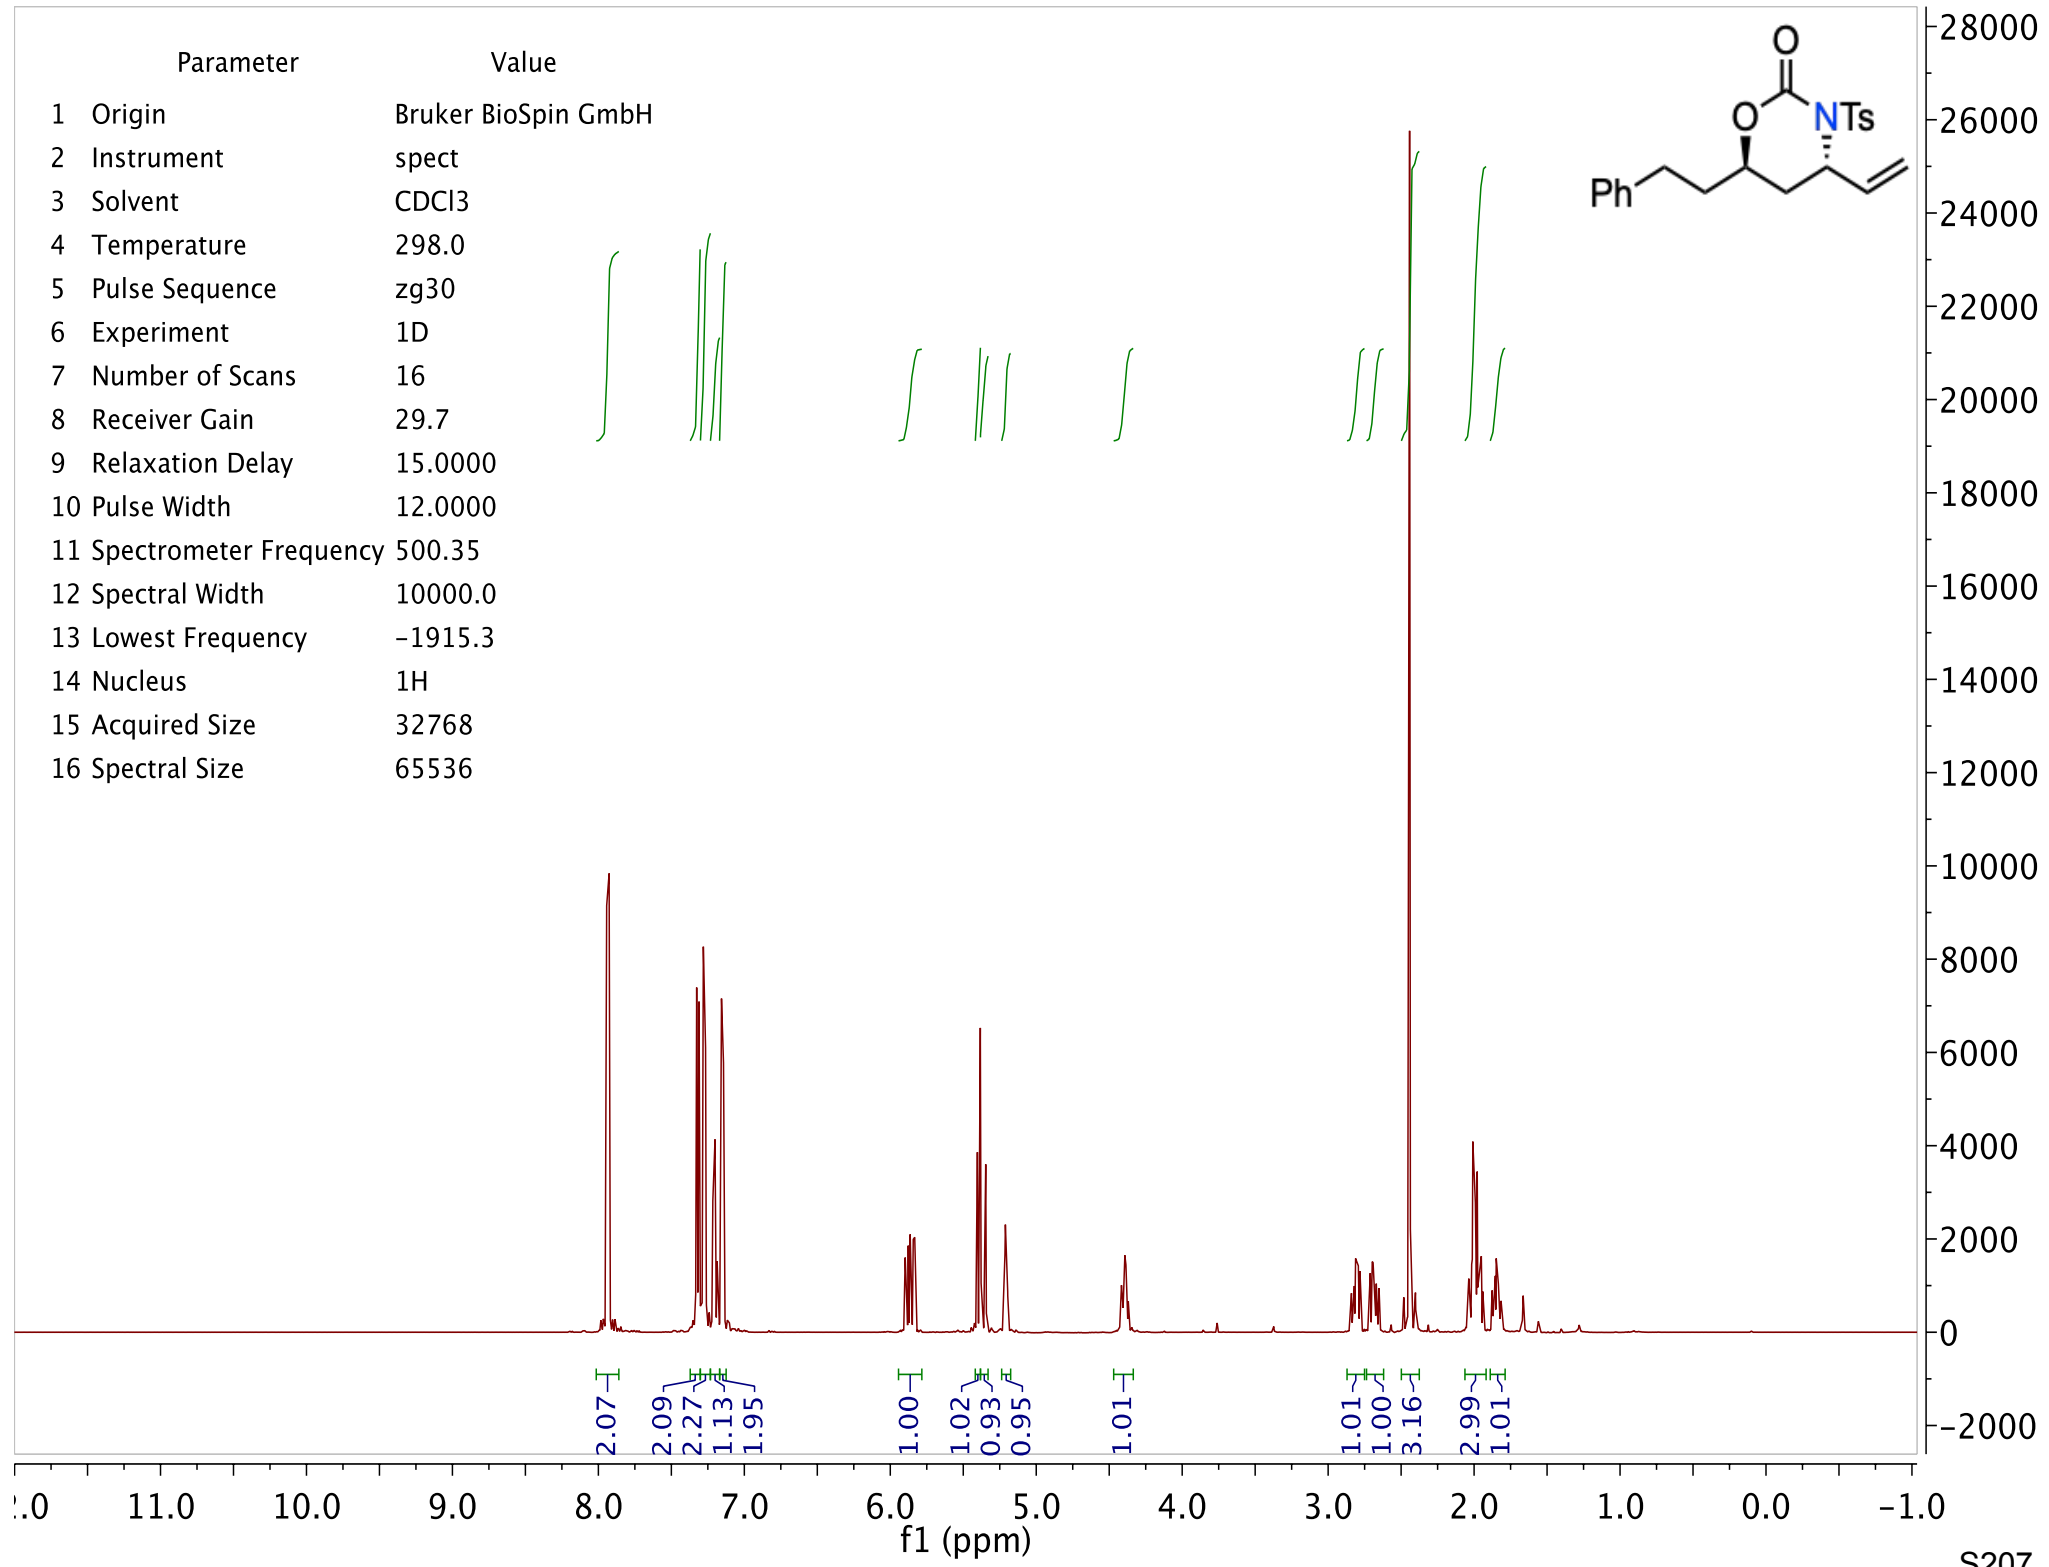

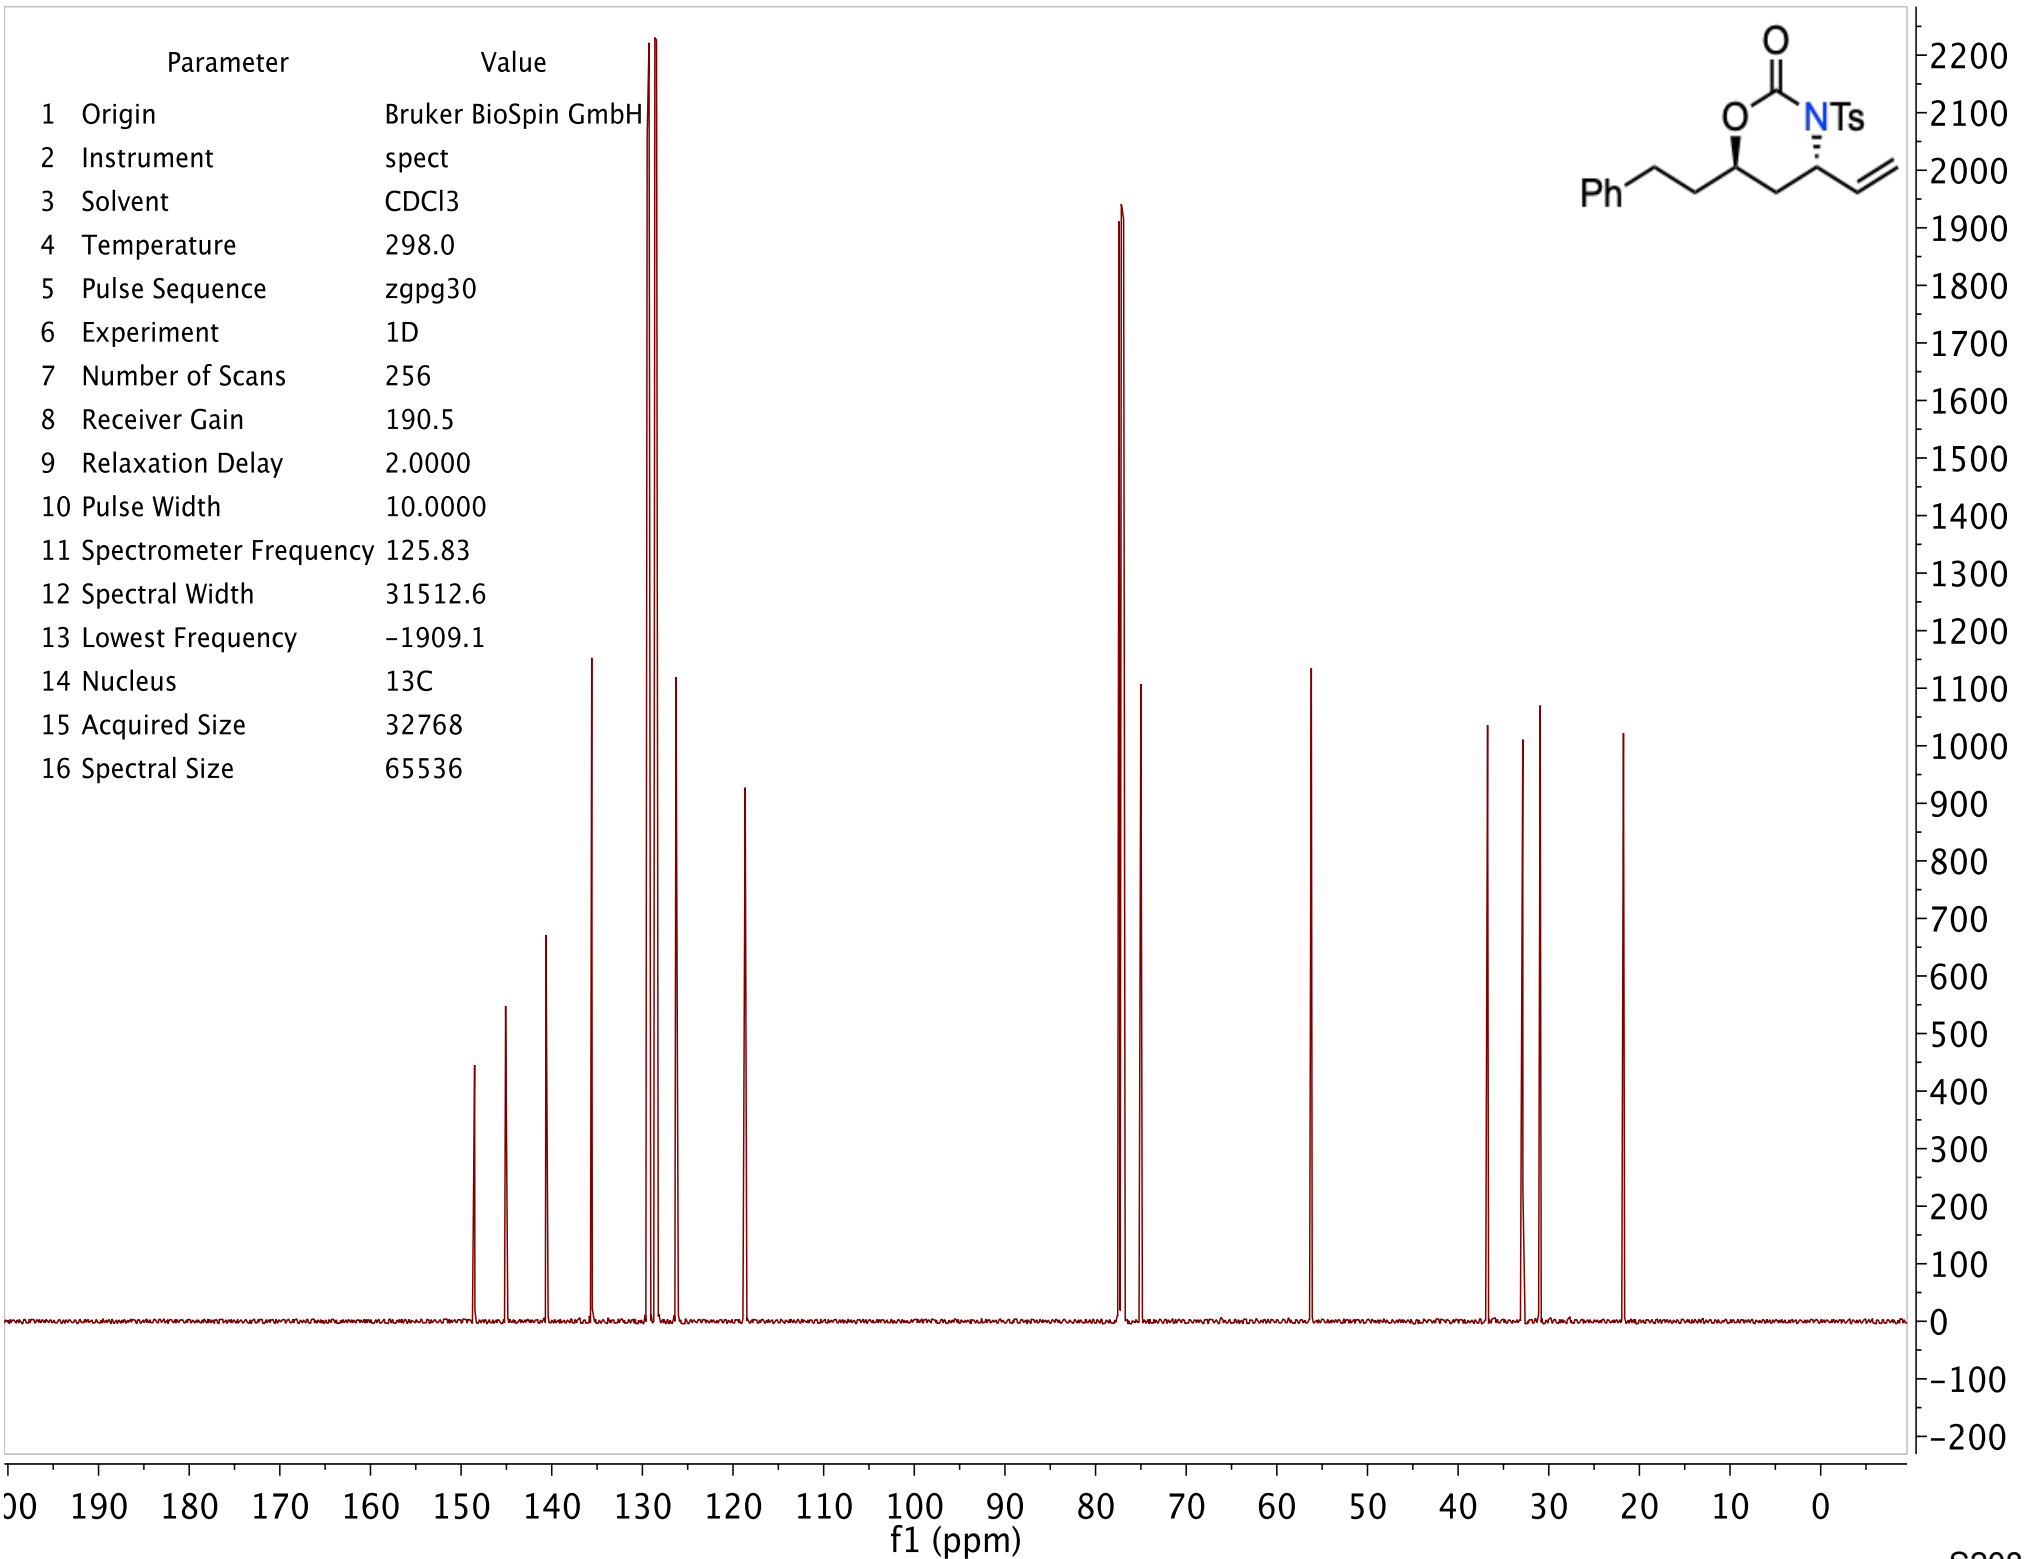

| Parameter                 | Value               |
|---------------------------|---------------------|
| 1 Origin                  | Bruker BioSpin GmbH |
| 2 Instrument              | spect               |
| 3 Solvent                 | CDCl3               |
| 4 Temperature             | 288.7               |
| 5 Pulse Sequence          | zg30                |
| 6 Experiment              | 1D                  |
| 7 Number of Scans         | 16                  |
| 8 Receiver Gain           | 86.0                |
| 9 Relaxation Delay        | 15.0000             |
| 10 Pulse Width            | 12.0000             |
| 11 Spectrometer Frequency | 500.35              |
| 12 Spectral Width         | 10000.0             |
| 13 Lowest Frequency       | -1921.8             |
| 14 Nucleus                | 1H                  |
| 15 Acquired Size          | 32768               |
| 16 Spectral Size          | 65536               |

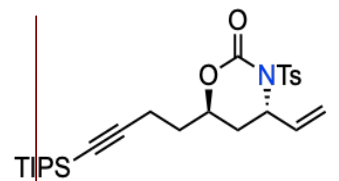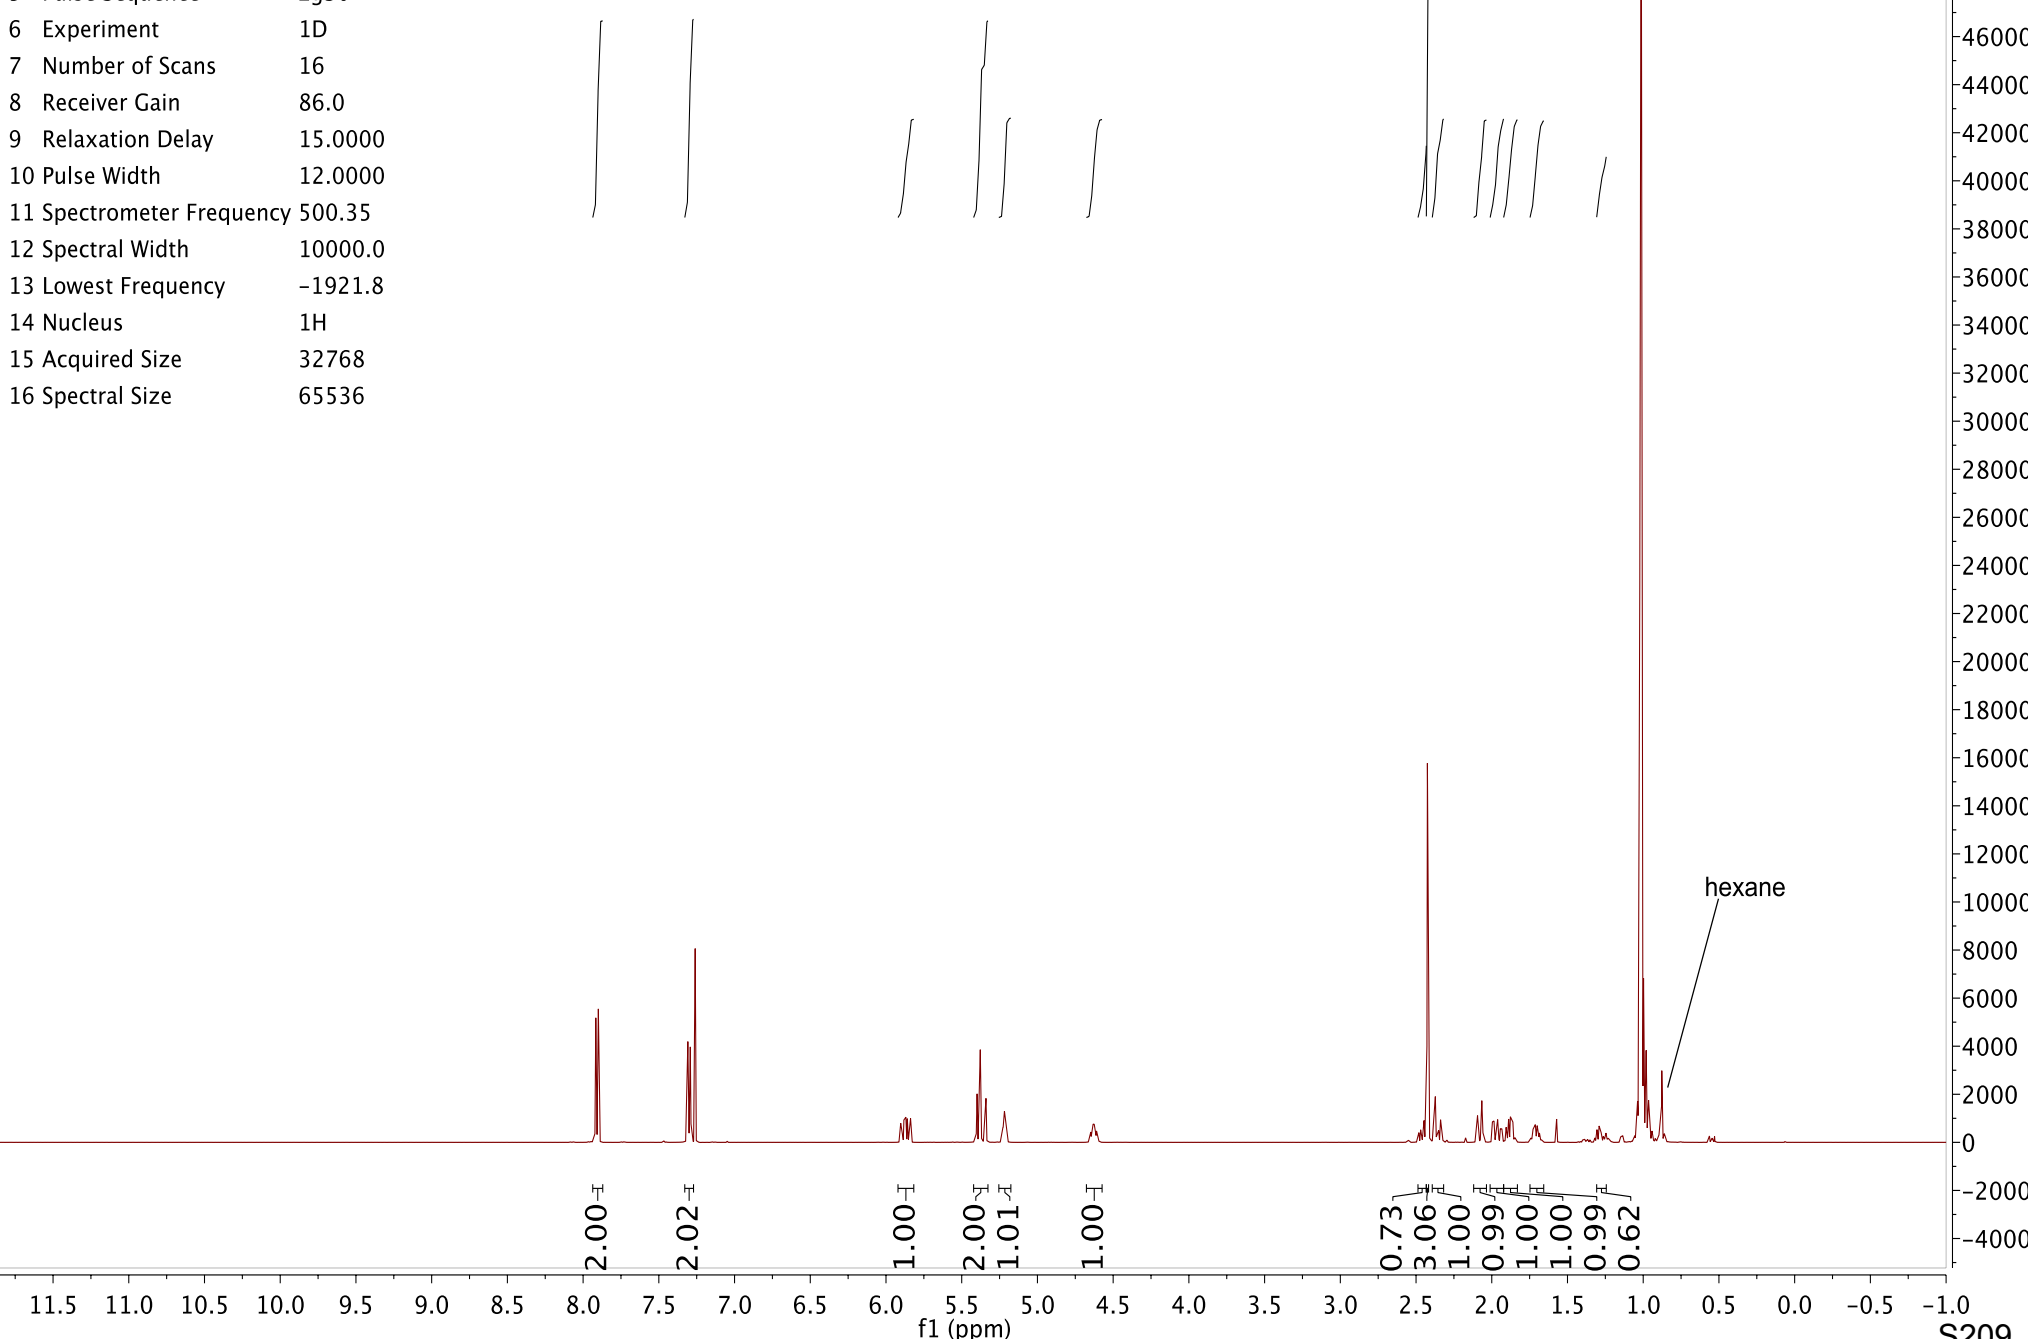

| Parameter                 | Value               |
|---------------------------|---------------------|
| 1 Origin                  | Bruker BioSpin GmbH |
| 2 Instrument              | spect               |
| 3 Solvent                 | CDCl3               |
| 4 Temperature             | 288.7               |
| 5 Pulse Sequence          | zgpg30              |
| 6 Experiment              | 1D                  |
| 7 Number of Scans         | 128                 |
| 8 Receiver Gain           | 190.5               |
| 9 Relaxation Delay        | 2.0000              |
| 10 Pulse Width            | 10.0000             |
| 11 Spectrometer Frequency | 125.83              |
| 12 Spectral Width         | 31512.6             |
| 13 Lowest Frequency       | -1902.5             |
| 14 Nucleus                | 13C                 |
| 15 Acquired Size          | 32768               |
| 16 Spectral Size          | 65536               |

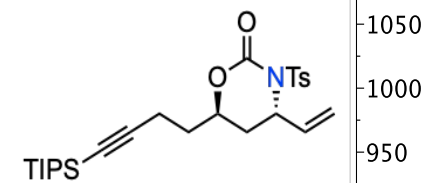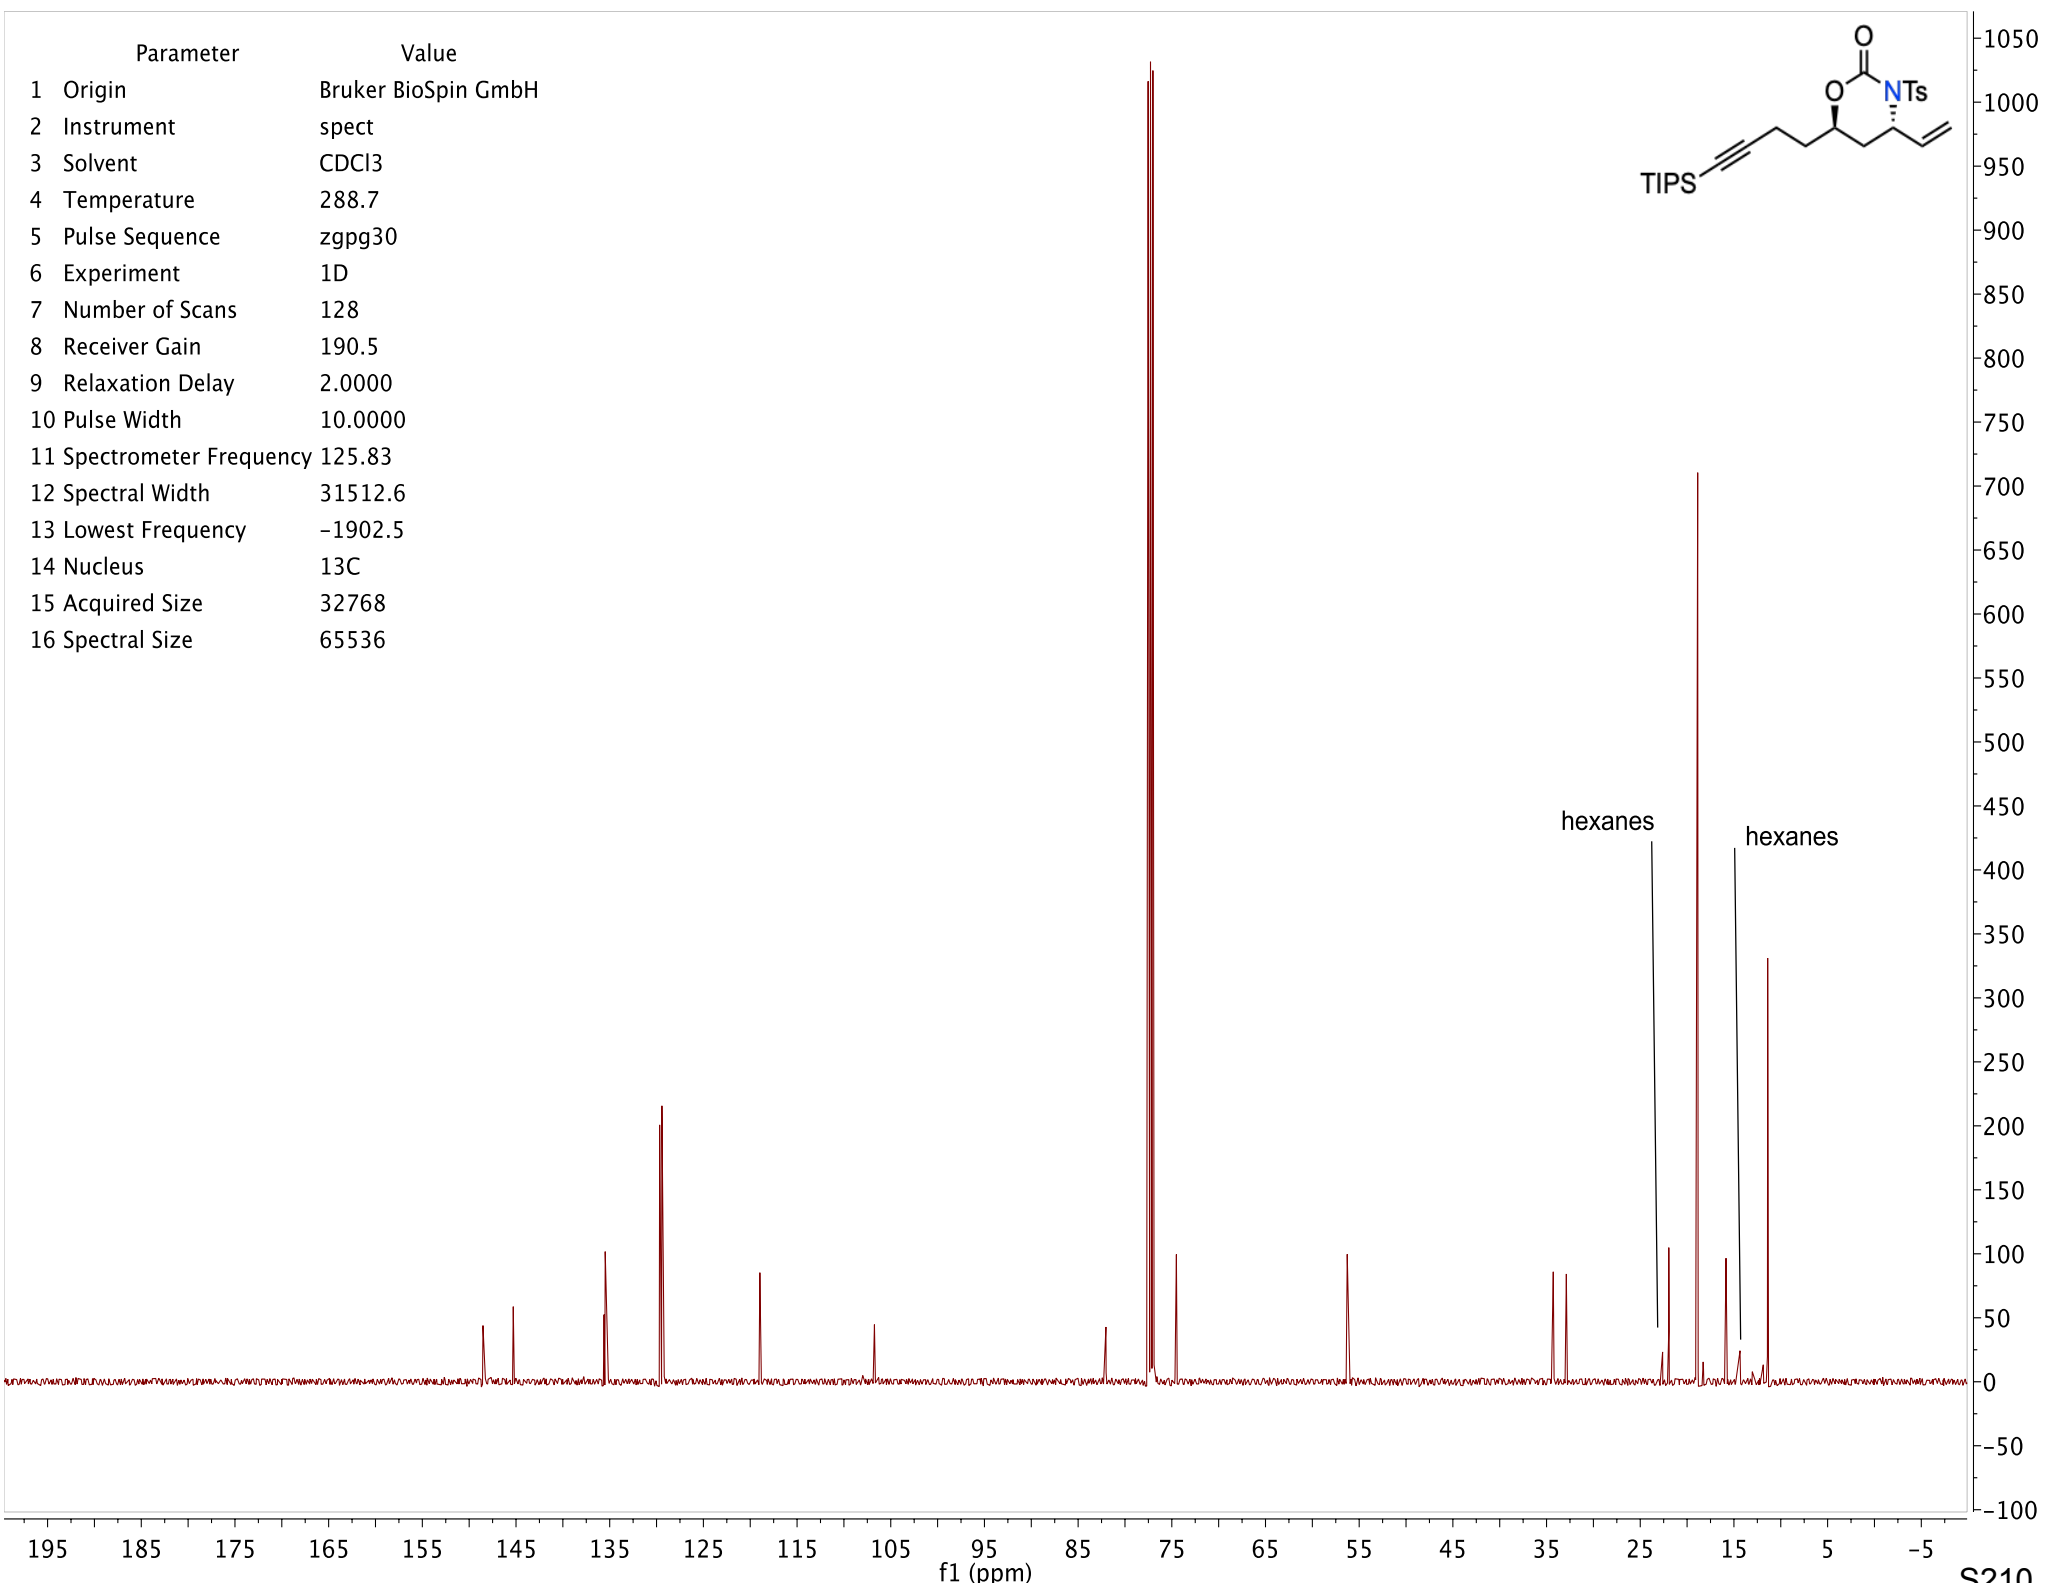

| Parameter                 | Value               |
|---------------------------|---------------------|
| 1 Origin                  | Bruker BioSpin GmbH |
| 2 Spectrometer            | spect               |
| 3 Solvent                 | CDCl3               |
| 4 Temperature             | 298.2               |
| 5 Pulse Sequence          | zg30                |
| 6 Experiment              | 1D                  |
| 7 Number of Scans         | 4                   |
| 8 Receiver Gain           | 55                  |
| 9 Relaxation Delay        | 15.0000             |
| 10 Pulse Width            | 12.0000             |
| 11 Spectrometer Frequency | 500.35              |
| 12 Spectral Width         | 10000.0             |
| 13 Lowest Frequency       | -1922.0             |
| 14 Nucleus                | 1H                  |
| 15 Acquired Size          | 32768               |
| 16 Spectral Size          | 65536               |

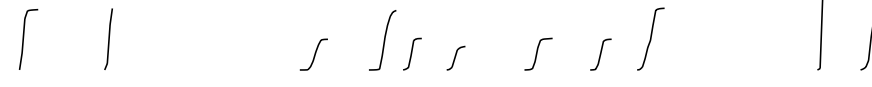

1.96  
2.00  
1.00  
1.94  
1.02  
0.76  
1.03  
1.00  
2.01

3.01  
1.87  
9.17  
9.45  
6.02

hexanes

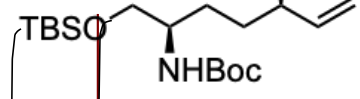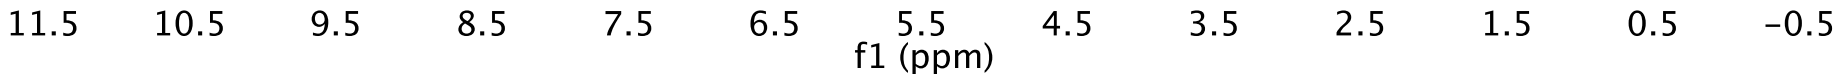

| Parameter                 | Value               |
|---------------------------|---------------------|
| 1 Origin                  | Bruker BioSpin GmbH |
| 2 Spectrometer            | spect               |
| 3 Solvent                 | CDCl3               |
| 4 Temperature             | 298.2               |
| 5 Pulse Sequence          | zgpg30              |
| 6 Experiment              | 1D                  |
| 7 Number of Scans         | 512                 |
| 8 Receiver Gain           | 191                 |
| 9 Relaxation Delay        | 1.0000              |
| 10 Pulse Width            | 10.0000             |
| 11 Spectrometer Frequency | 125.83              |
| 12 Spectral Width         | 31512.6             |
| 13 Lowest Frequency       | -1899.2             |
| 14 Nucleus                | 13C                 |
| 15 Acquired Size          | 32768               |
| 16 Spectral Size          | 65536               |

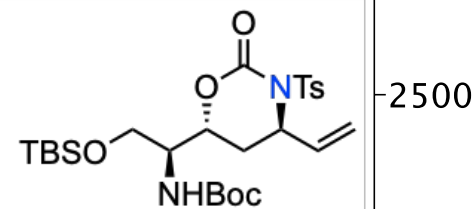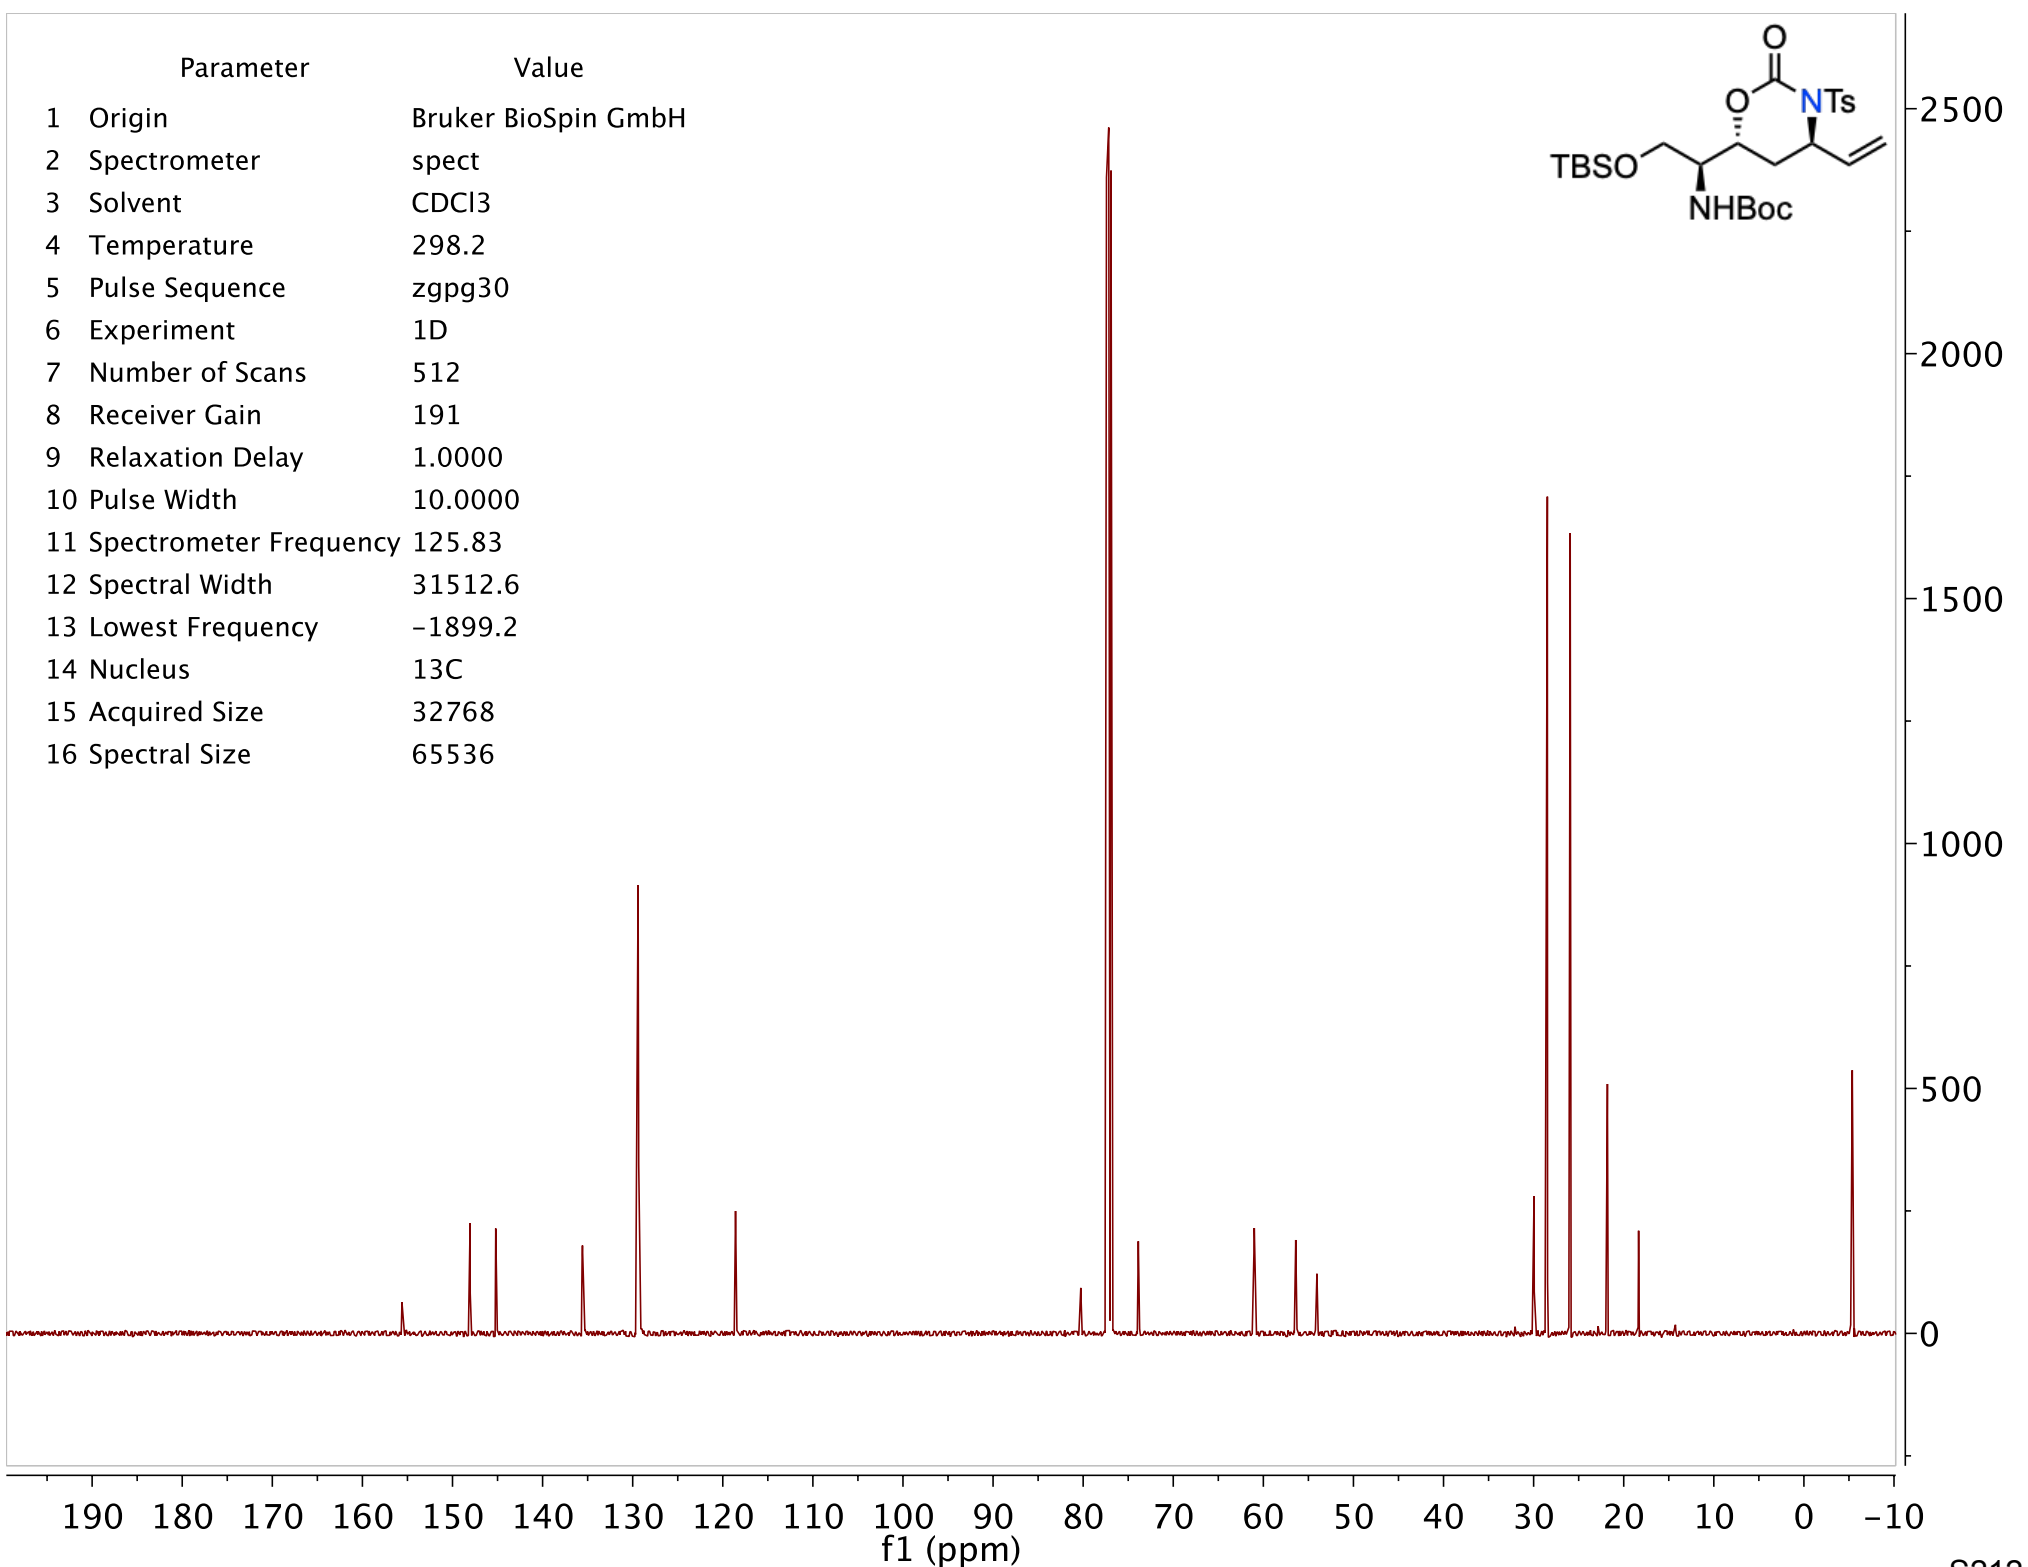

| Parameter                 | Value   |
|---------------------------|---------|
| 1 Origin                  | Varian  |
| 2 Spectrometer            | inova   |
| 3 Solvent                 | CDCl3   |
| 4 Temperature             | 25.0    |
| 5 Pulse Sequence          | s2pul   |
| 6 Experiment              | 1D      |
| 7 Number of Scans         | 6       |
| 8 Receiver Gain           | 32      |
| 9 Relaxation Delay        | 15.0000 |
| 10 Pulse Width            | 7.0000  |
| 11 Spectrometer Frequency | 500.07  |
| 12 Spectral Width         | 8000.0  |
| 13 Lowest Frequency       | -1520.6 |
| 14 Nucleus                | 1H      |
| 15 Acquired Size          | 32768   |
| 16 Spectral Size          | 65536   |

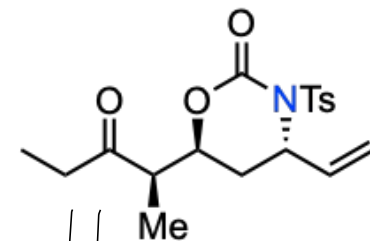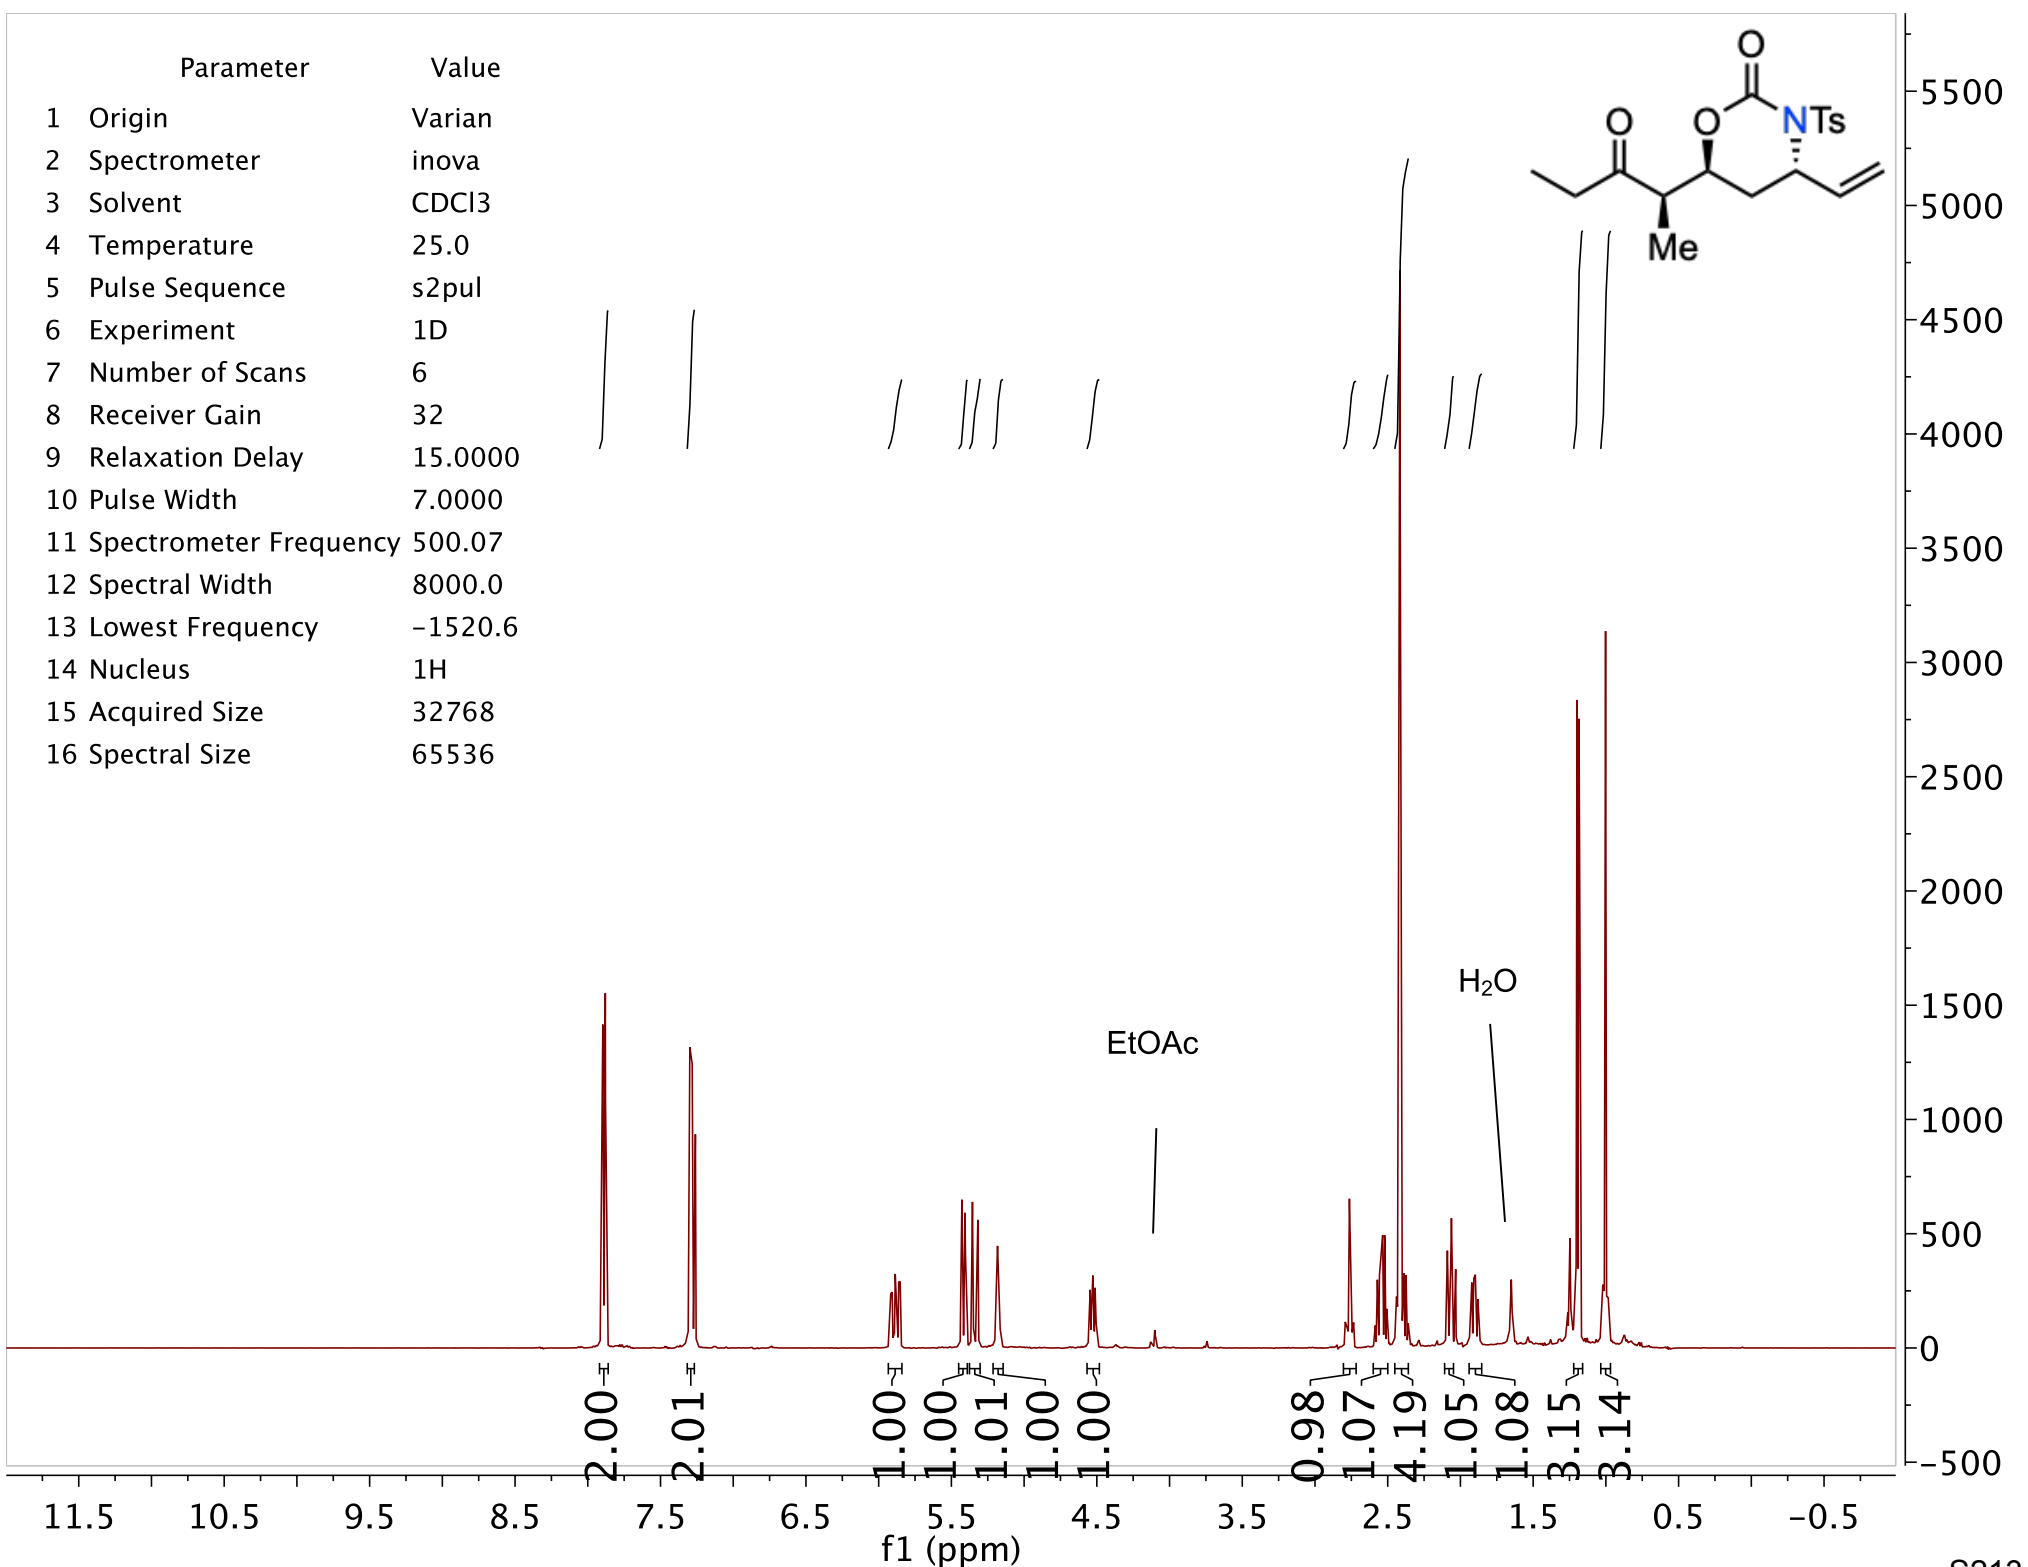

| Parameter                 | Value   |
|---------------------------|---------|
| 1 Origin                  | Varian  |
| 2 Spectrometer            | inova   |
| 3 Solvent                 | CDCl3   |
| 4 Temperature             | 20.0    |
| 5 Pulse Sequence          | s2pul   |
| 6 Experiment              | 1D      |
| 7 Number of Scans         | 1472    |
| 8 Receiver Gain           | 60      |
| 9 Relaxation Delay        | 1.0000  |
| 10 Pulse Width            | 6.0000  |
| 11 Spectrometer Frequency | 125.66  |
| 12 Spectral Width         | 30165.9 |
| 13 Lowest Frequency       | -1276.9 |
| 14 Nucleus                | 13C     |
| 15 Acquired Size          | 32768   |
| 16 Spectral Size          | 65536   |

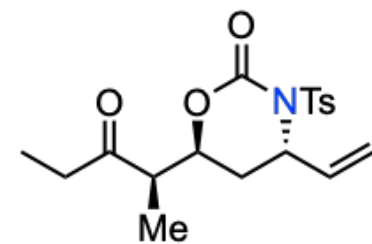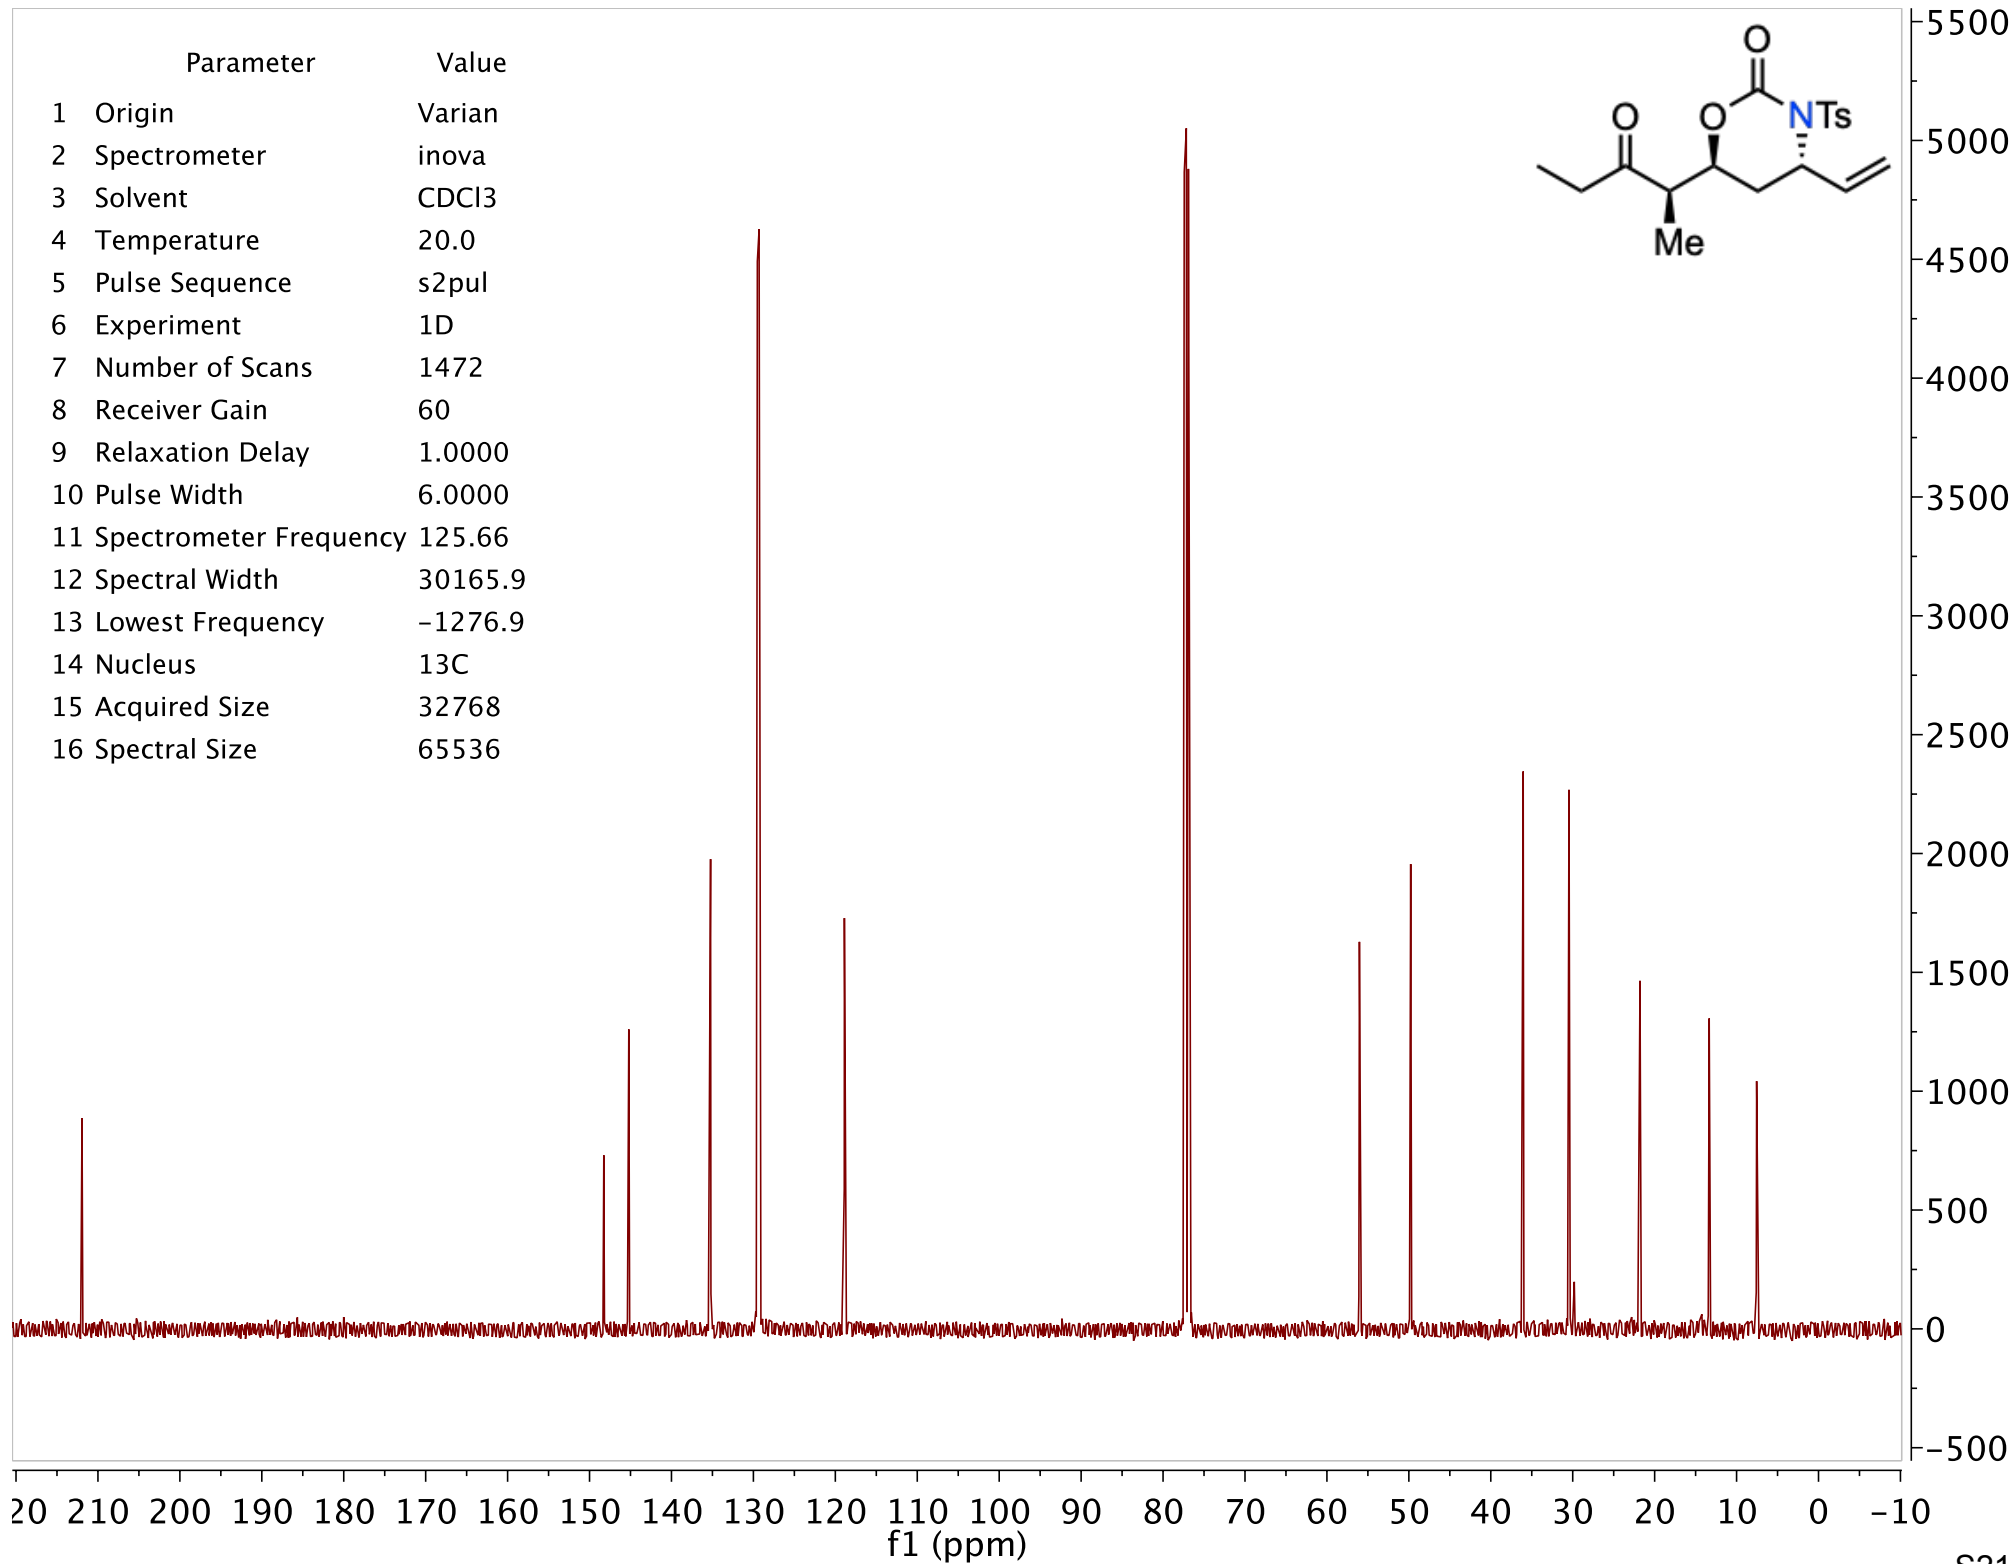



| Parameter                 | Value               |
|---------------------------|---------------------|
| 1 Origin                  | Bruker BioSpin GmbH |
| 2 Spectrometer            | spect               |
| 3 Solvent                 | CDCl3               |
| 4 Temperature             | 296.2               |
| 5 Pulse Sequence          | zg30                |
| 6 Experiment              | 1D                  |
| 7 Number of Scans         | 6                   |
| 8 Receiver Gain           | 30                  |
| 9 Relaxation Delay        | 15.0000             |
| 10 Pulse Width            | 12.0000             |
| 11 Spectrometer Frequency | 500.35              |
| 12 Spectral Width         | 10000.0             |
| 13 Lowest Frequency       | -1922.5             |
| 14 Nucleus                | 1H                  |
| 15 Acquired Size          | 32768               |
| 16 Spectral Size          | 65536               |

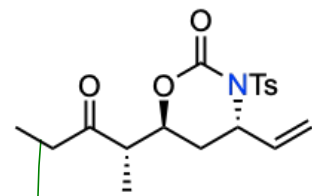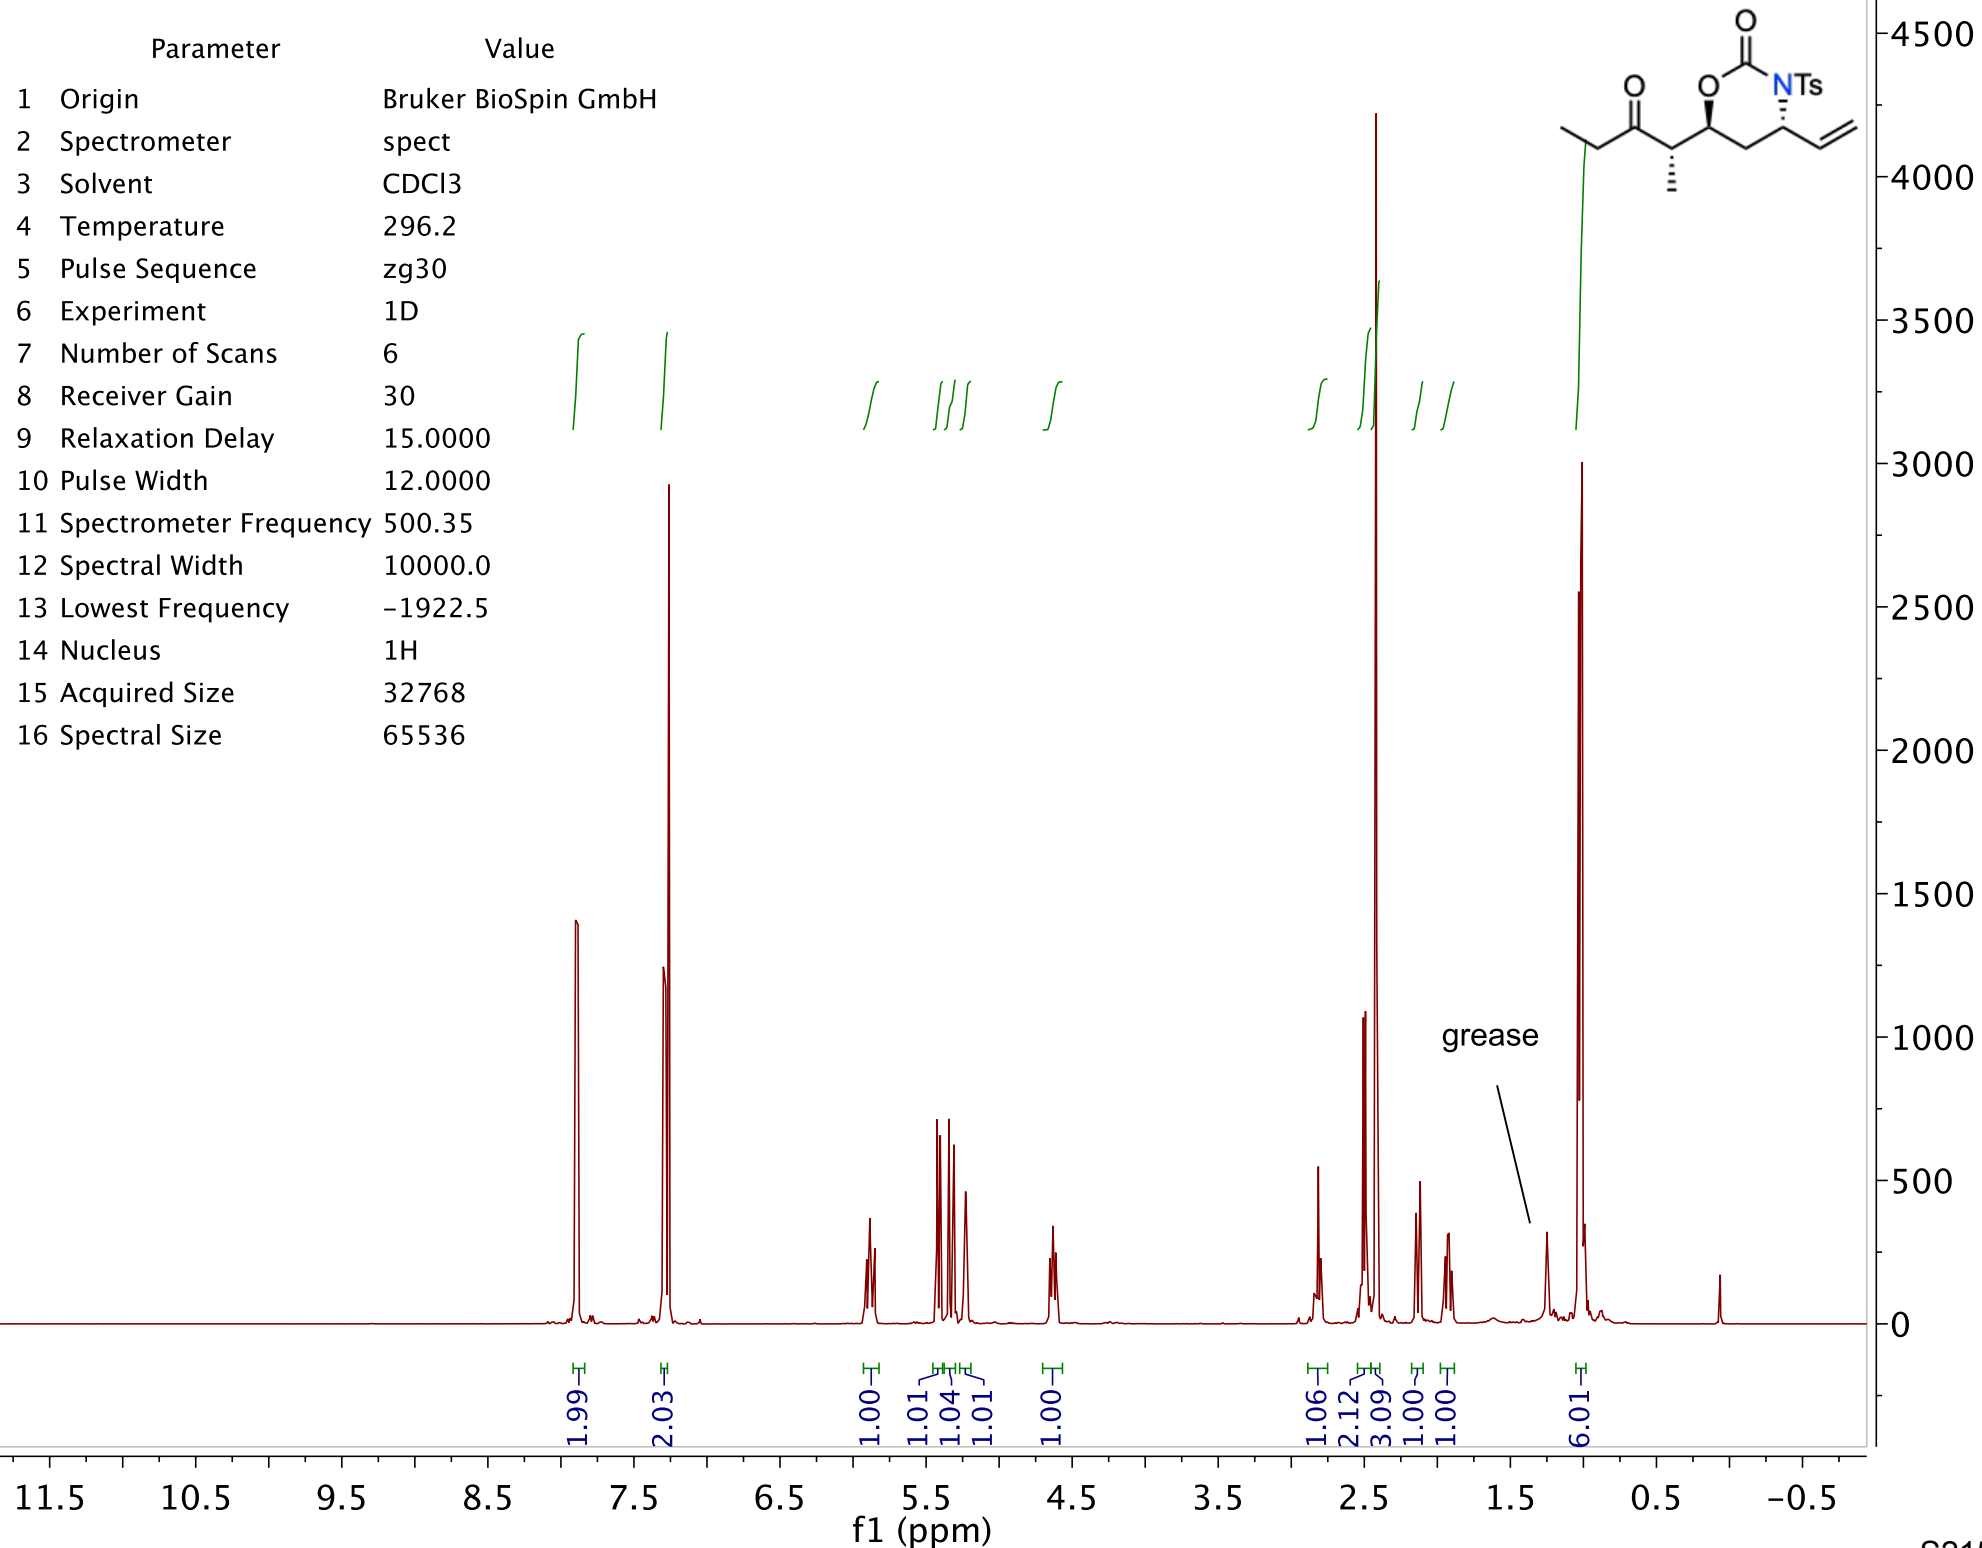

| Parameter                 | Value               |
|---------------------------|---------------------|
| 1 Origin                  | Bruker BioSpin GmbH |
| 2 Spectrometer            | spect               |
| 3 Solvent                 | CDCl3               |
| 4 Temperature             | 296.2               |
| 5 Pulse Sequence          | zgpg30              |
| 6 Experiment              | 1D                  |
| 7 Number of Scans         | 800                 |
| 8 Receiver Gain           | 191                 |
| 9 Relaxation Delay        | 1.0000              |
| 10 Pulse Width            | 10.0000             |
| 11 Spectrometer Frequency | 125.83              |
| 12 Spectral Width         | 31512.6             |
| 13 Lowest Frequency       | -1902.6             |
| 14 Nucleus                | 13C                 |
| 15 Acquired Size          | 32768               |
| 16 Spectral Size          | 65536               |

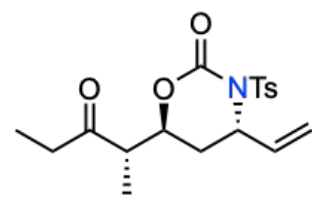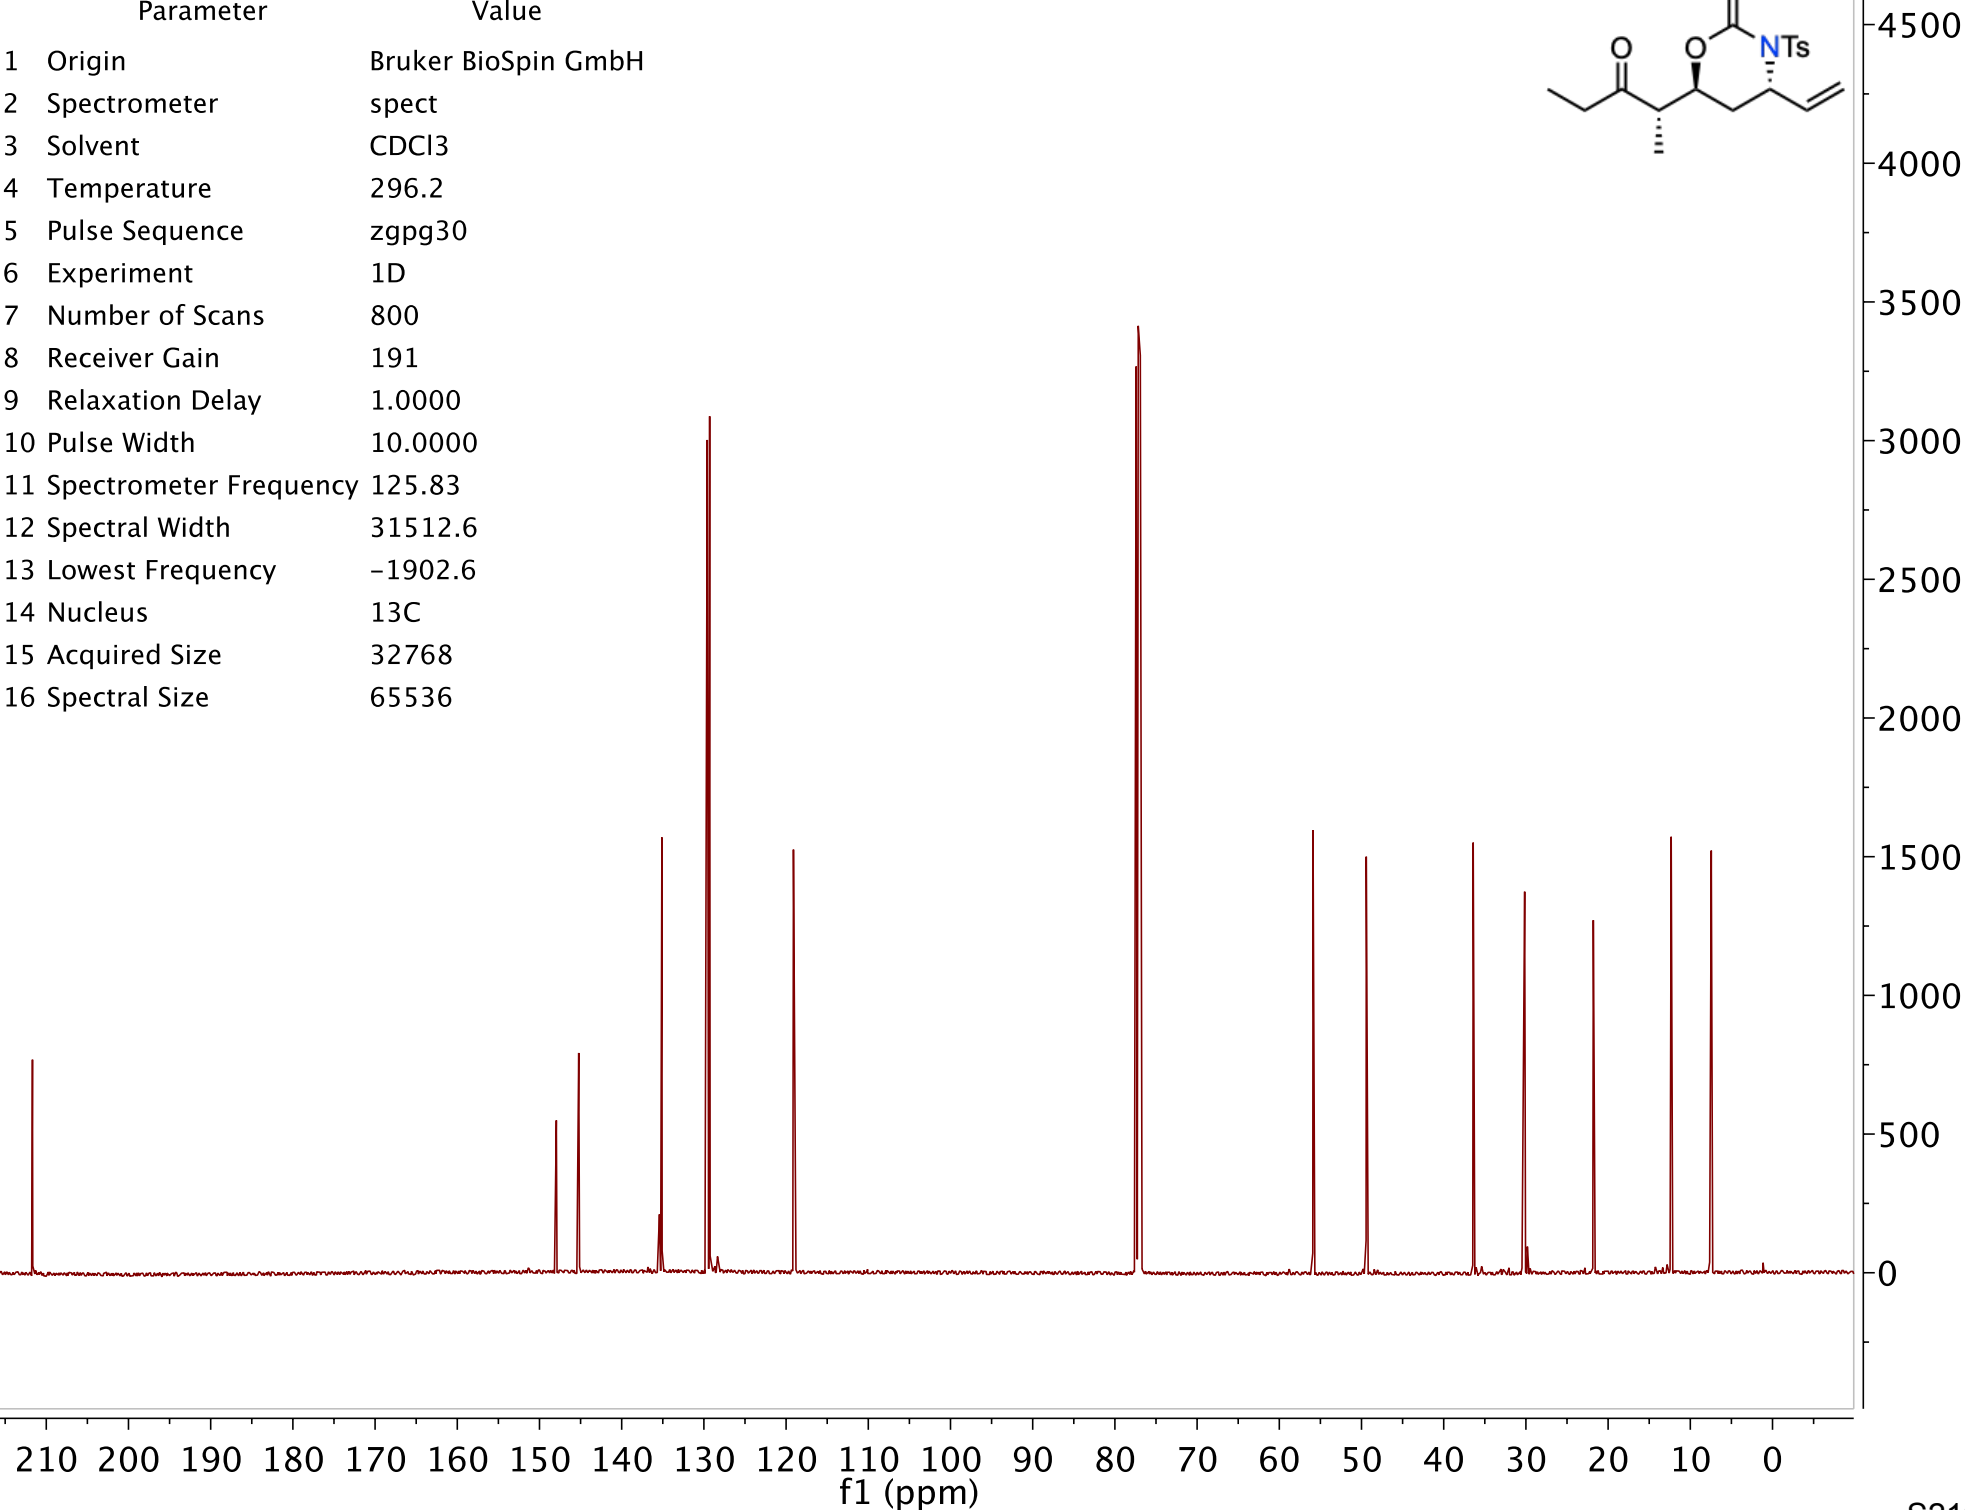

| Parameter                 | Value               |
|---------------------------|---------------------|
| 1 Origin                  | Bruker BioSpin GmbH |
| 2 Instrument              | spect               |
| 3 Solvent                 | CDCl3               |
| 4 Temperature             | 298.1               |
| 5 Pulse Sequence          | zg30                |
| 6 Experiment              | 1D                  |
| 7 Number of Scans         | 16                  |
| 8 Receiver Gain           | 122.8               |
| 9 Relaxation Delay        | 15.0000             |
| 10 Pulse Width            | 12.0000             |
| 11 Spectrometer Frequency | 500.35              |
| 12 Spectral Width         | 10000.0             |
| 13 Lowest Frequency       | -1921.3             |
| 14 Nucleus                | 1H                  |
| 15 Acquired Size          | 32768               |
| 16 Spectral Size          | 65536               |

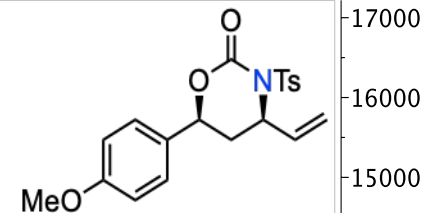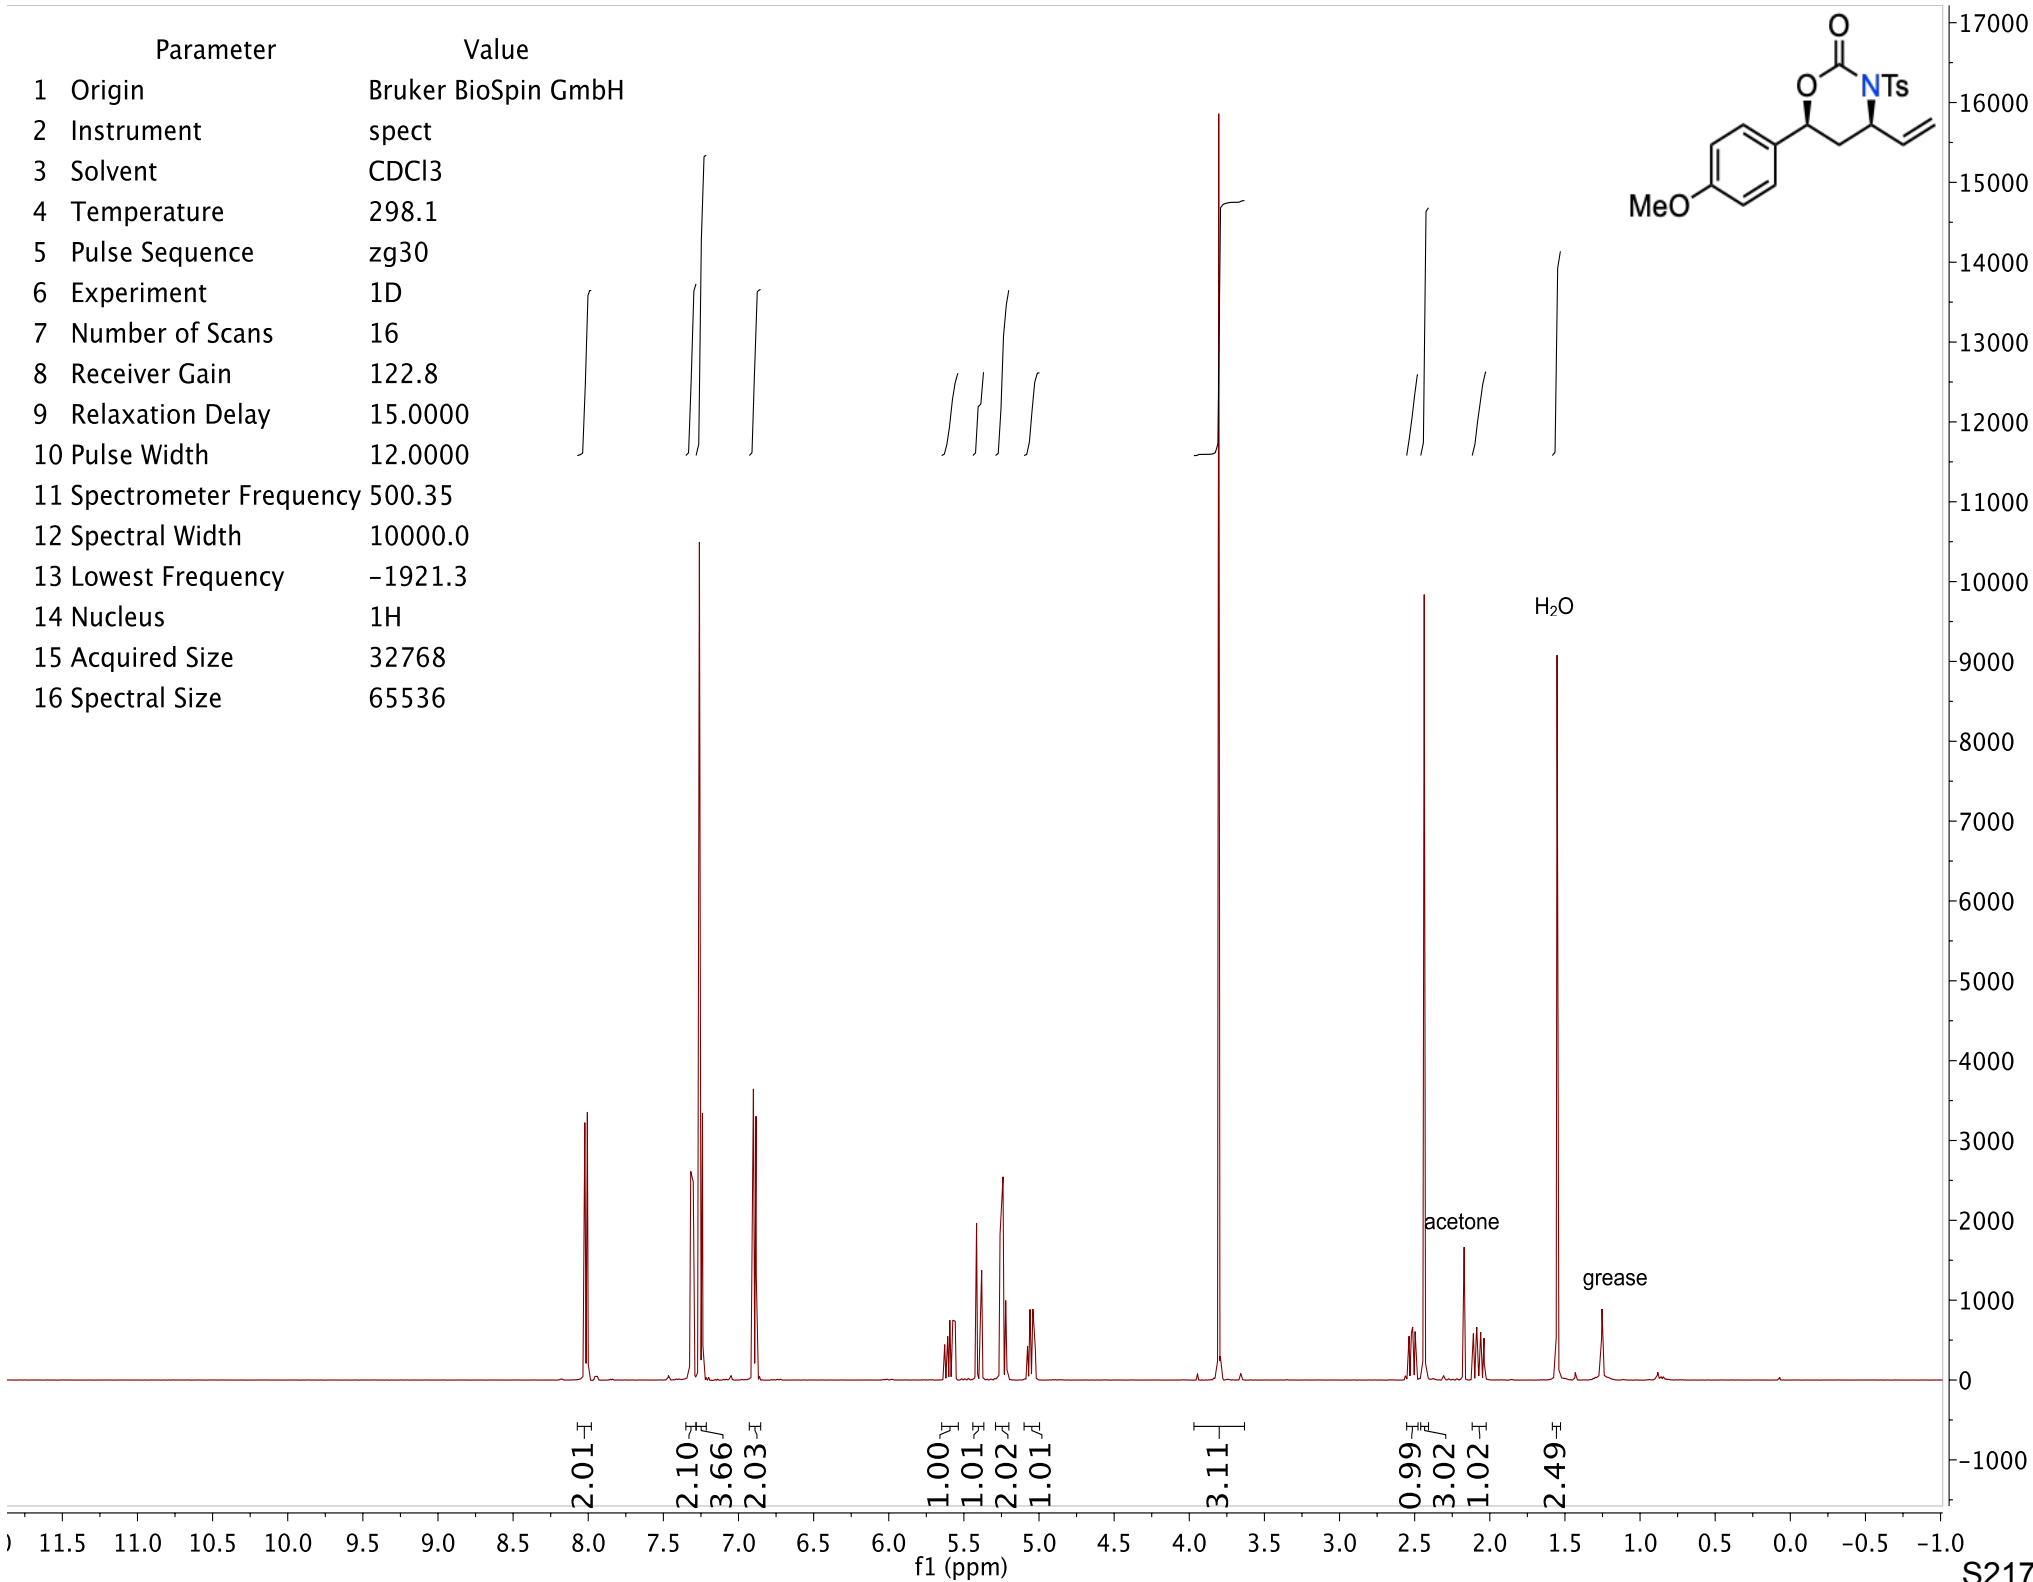

| Parameter                 | Value               |
|---------------------------|---------------------|
| 1 Origin                  | Bruker BioSpin GmbH |
| 2 Instrument              | spect               |
| 3 Solvent                 | CDCl3               |
| 4 Temperature             | 298.1               |
| 5 Pulse Sequence          | zgpg30              |
| 6 Experiment              | 1D                  |
| 7 Number of Scans         | 2048                |
| 8 Receiver Gain           | 190.5               |
| 9 Relaxation Delay        | 2.0000              |
| 10 Pulse Width            | 10.0000             |
| 11 Spectrometer Frequency | 125.83              |
| 12 Spectral Width         | 31512.6             |
| 13 Lowest Frequency       | -1880.1             |
| 14 Nucleus                | 13C                 |
| 15 Acquired Size          | 32768               |
| 16 Spectral Size          | 65536               |

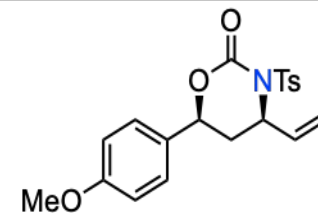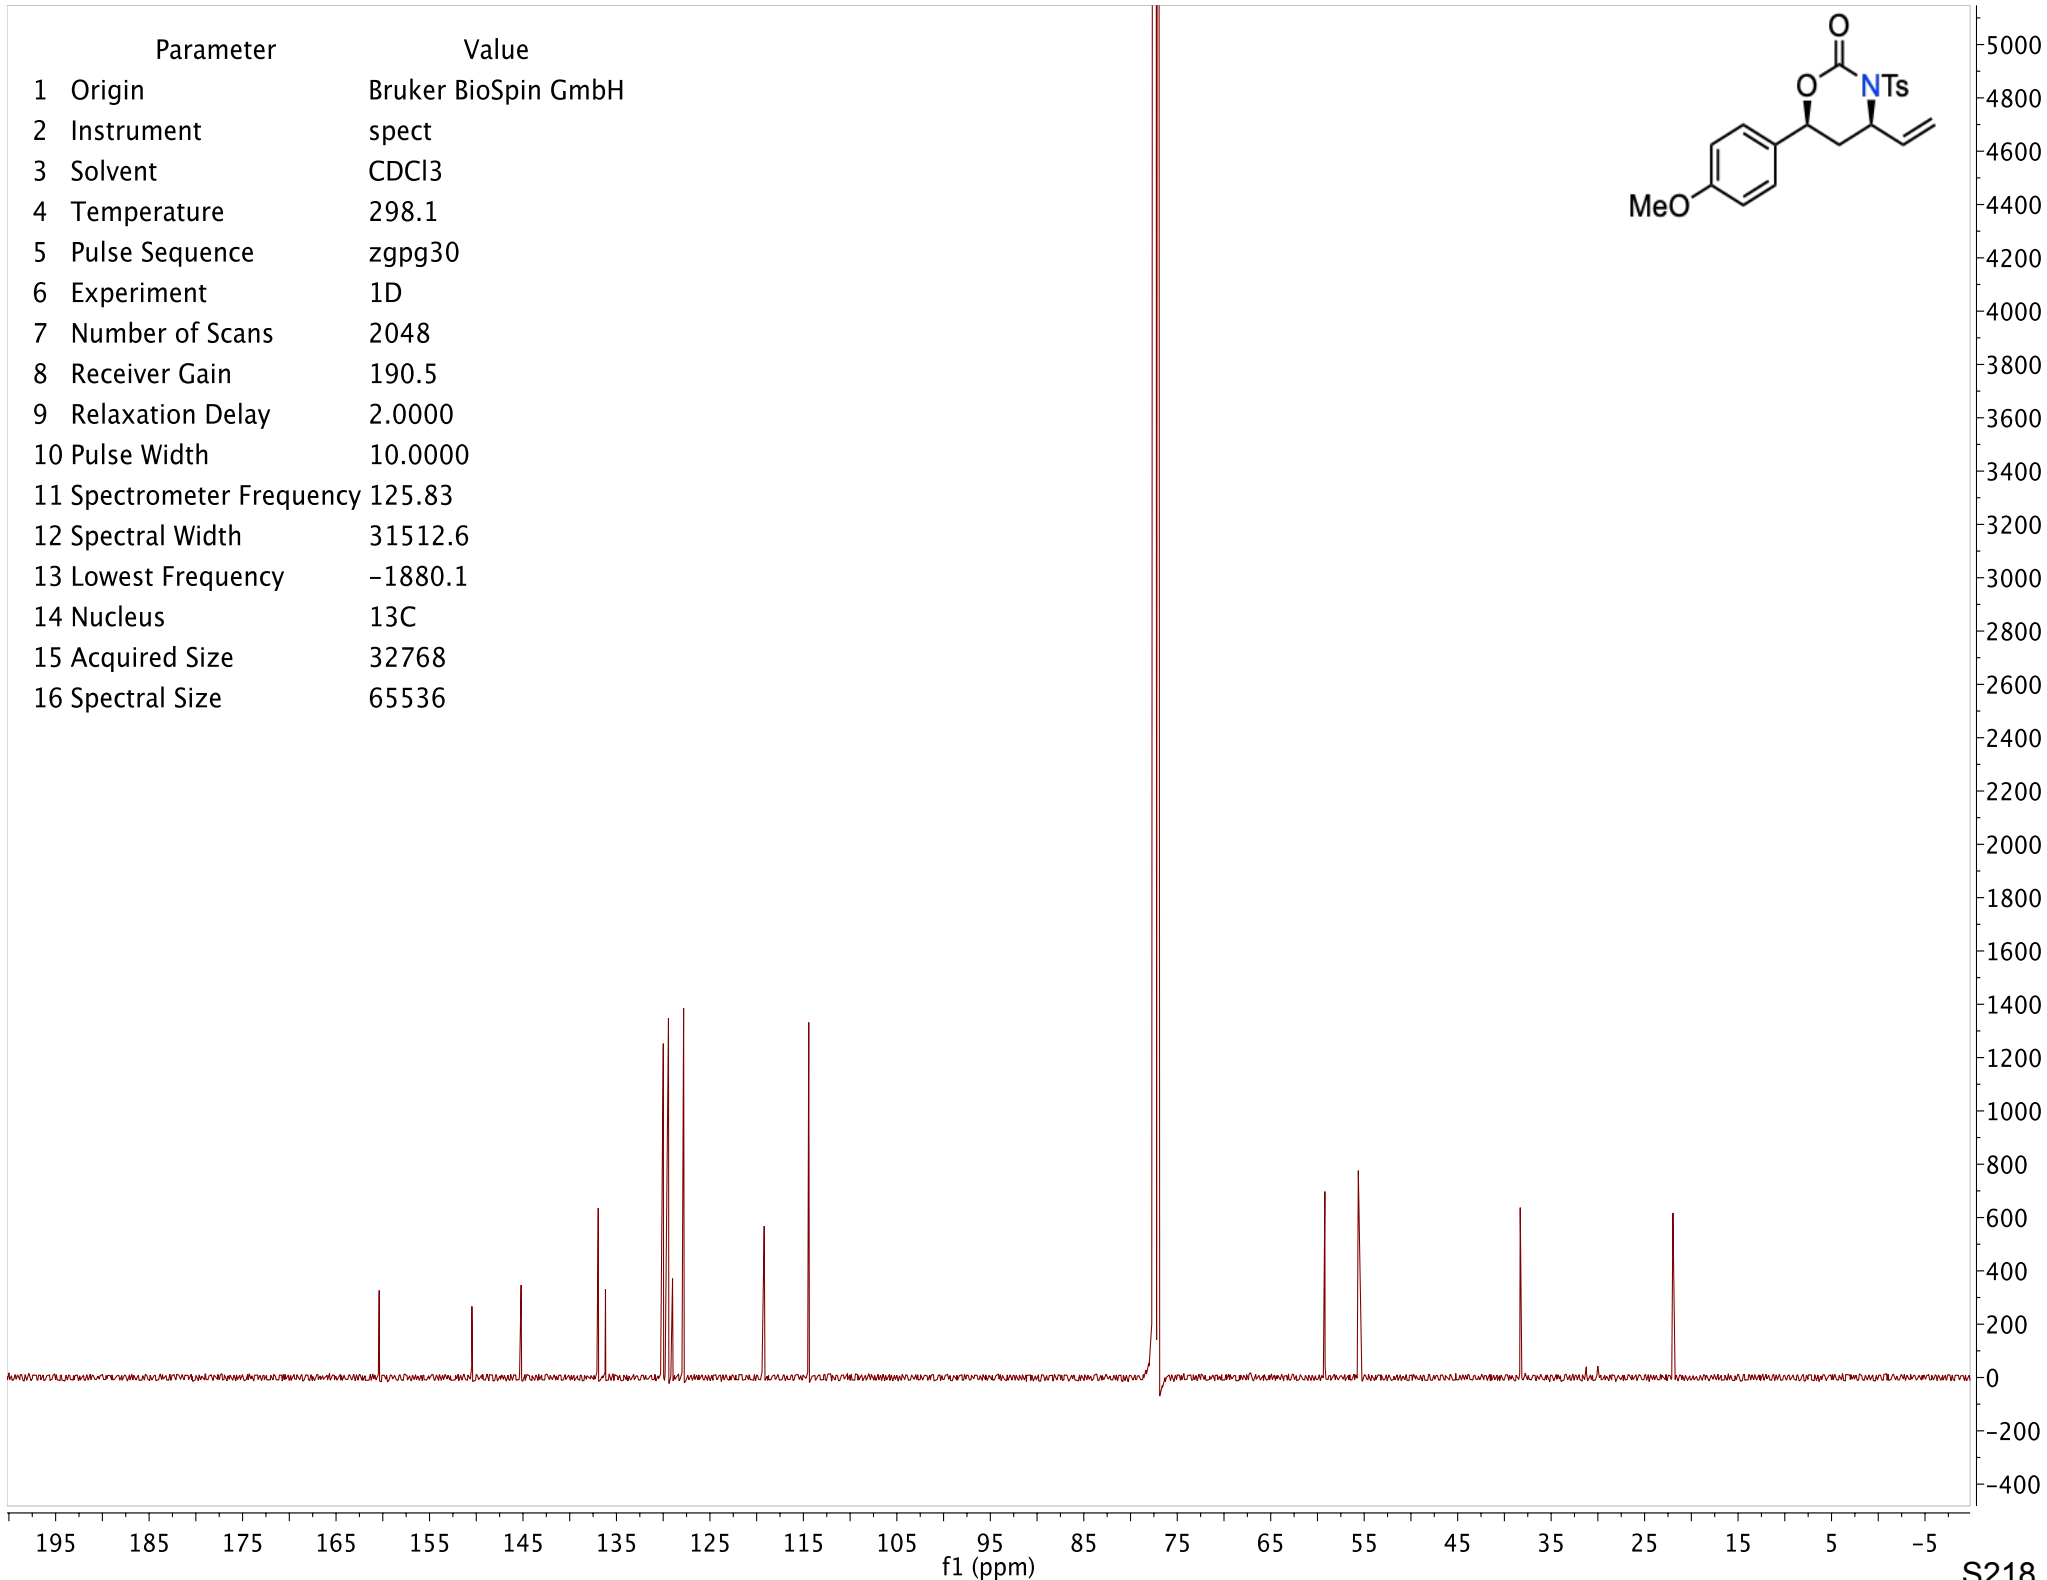

| Parameter                 | Value               |
|---------------------------|---------------------|
| 1 Origin                  | Bruker BioSpin GmbH |
| 2 Spectrometer            | spect               |
| 3 Solvent                 | CDCl <sub>3</sub>   |
| 4 Temperature             | 296.2               |
| 5 Pulse Sequence          | zg30                |
| 6 Experiment              | 1D                  |
| 7 Number of Scans         | 6                   |
| 8 Receiver Gain           | 107                 |
| 9 Relaxation Delay        | 15.0000             |
| 10 Pulse Width            | 12.0000             |
| 11 Spectrometer Frequency | 500.35              |
| 12 Spectral Width         | 10000.0             |
| 13 Lowest Frequency       | -1923.3             |
| 14 Nucleus                | <sup>1</sup> H      |
| 15 Acquired Size          | 32768               |
| 16 Spectral Size          | 65536               |

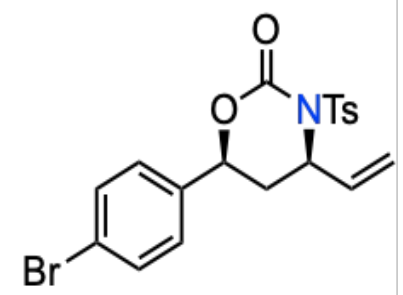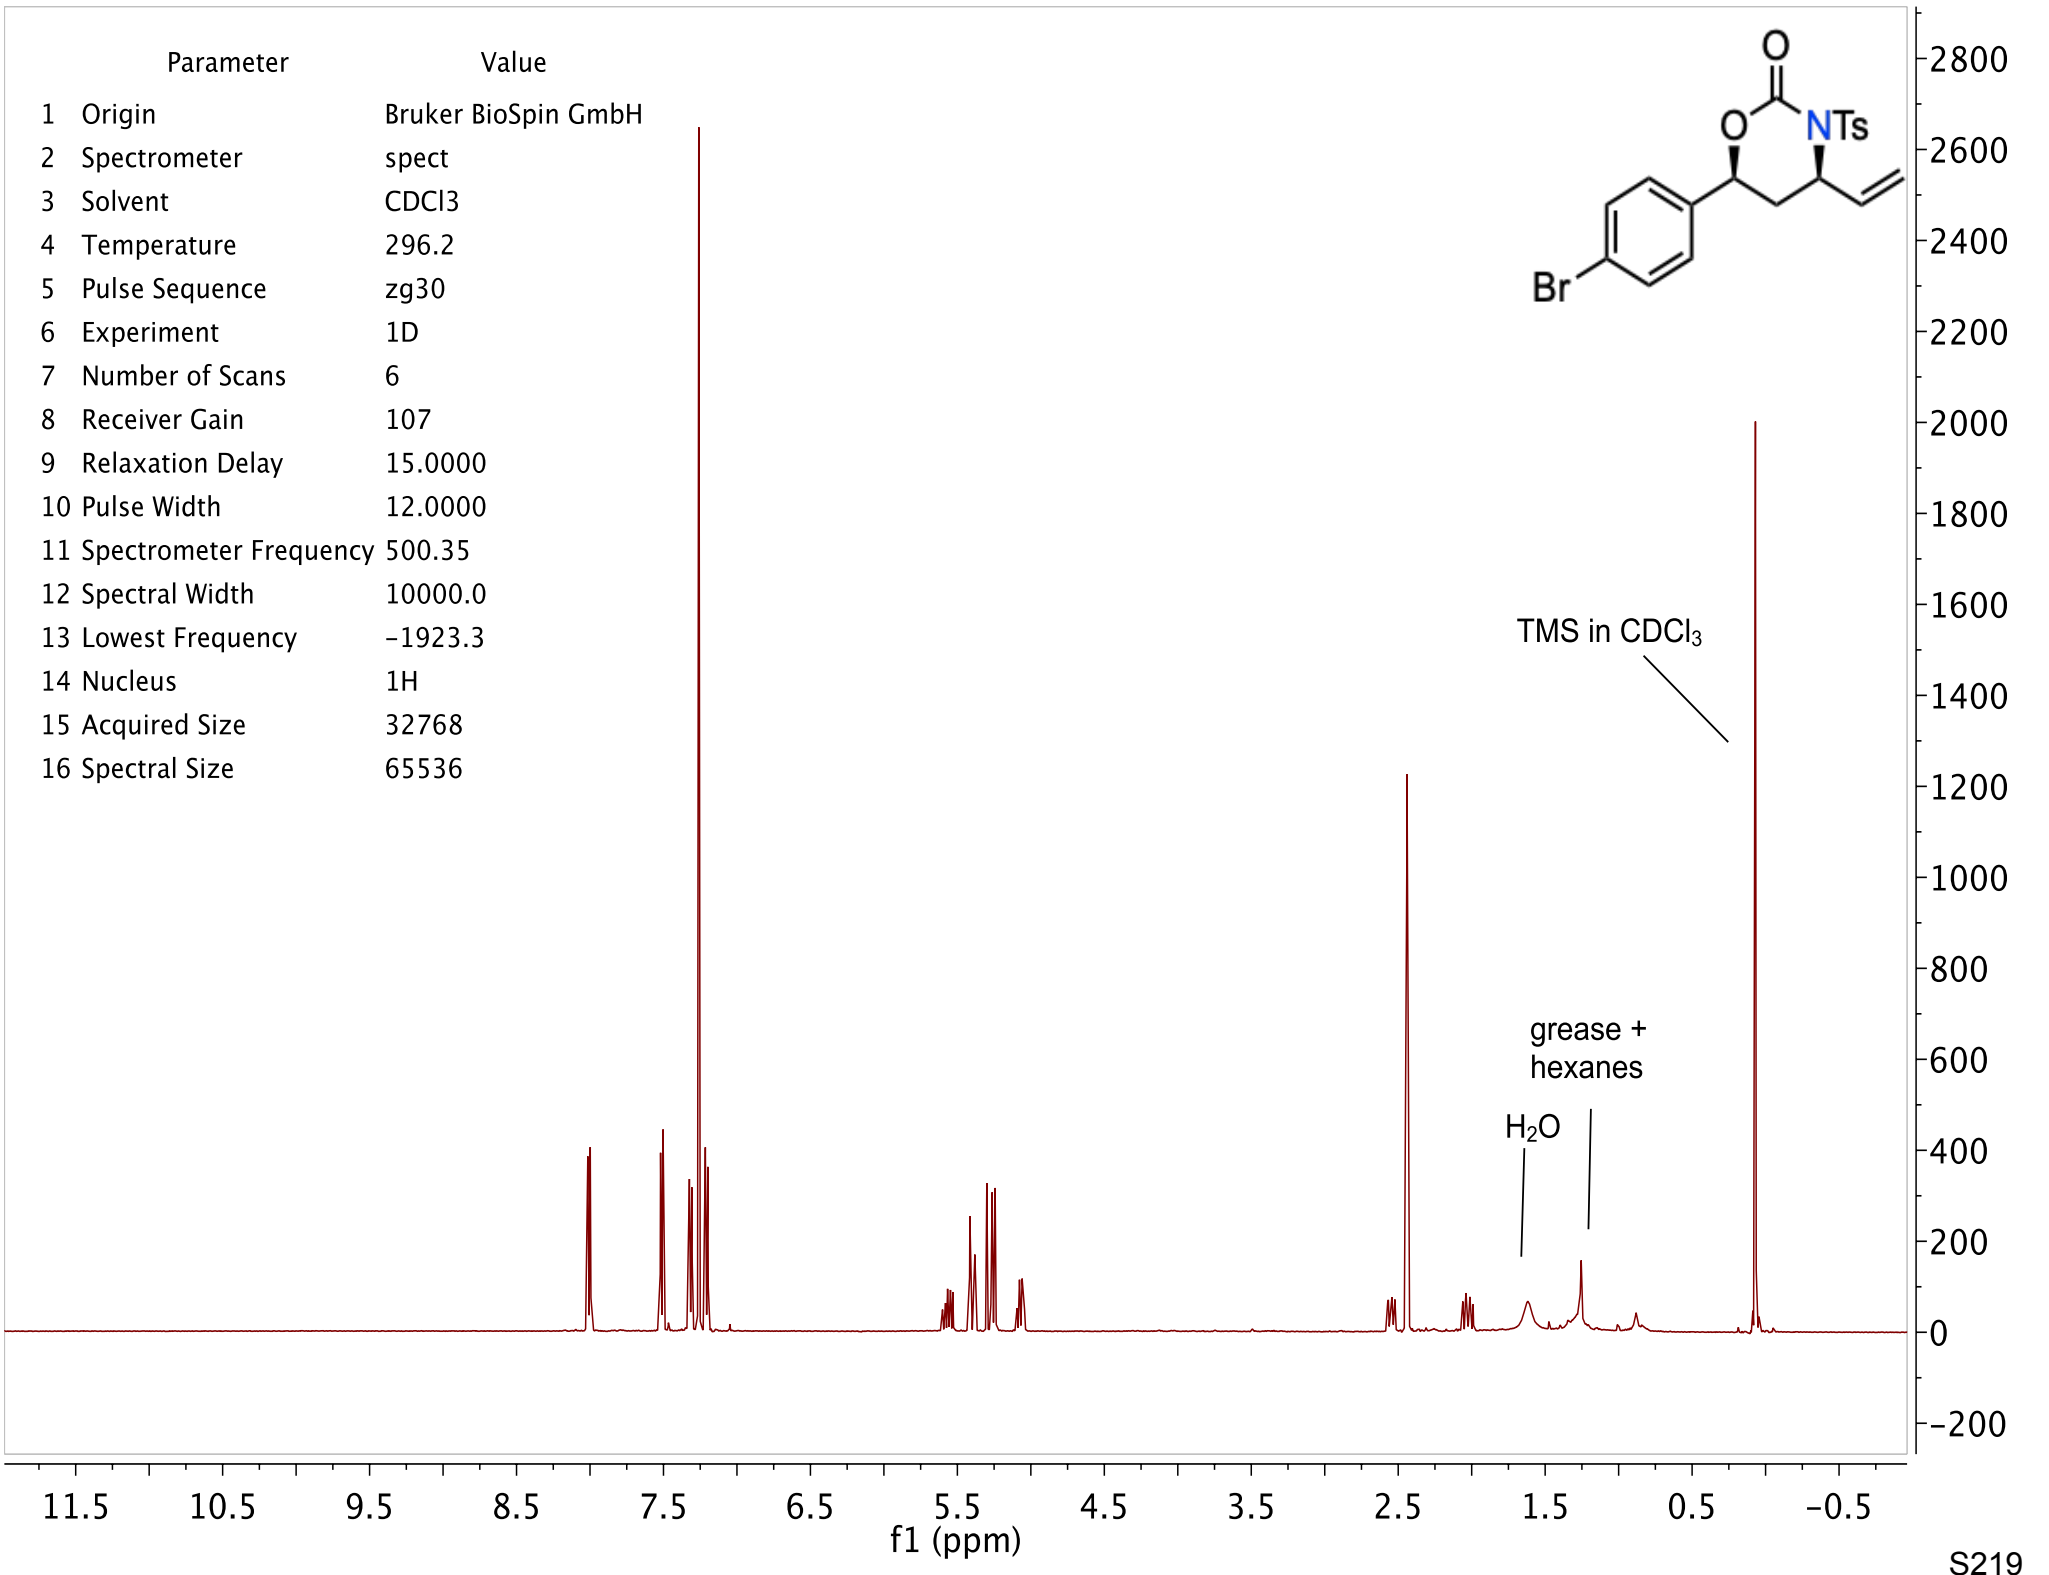

| Parameter                 | Value               |
|---------------------------|---------------------|
| 1 Origin                  | Bruker BioSpin GmbH |
| 2 Instrument              | spect               |
| 3 Solvent                 | CDCl3               |
| 4 Temperature             | 298.0               |
| 5 Pulse Sequence          | zgpg30              |
| 6 Experiment              | 1D                  |
| 7 Number of Scans         | 1024                |
| 8 Receiver Gain           | 190.5               |
| 9 Relaxation Delay        | 2.0000              |
| 10 Pulse Width            | 10.0000             |
| 11 Spectrometer Frequency | 125.83              |
| 12 Spectral Width         | 31512.6             |
| 13 Lowest Frequency       | -1898.9             |
| 14 Nucleus                | 13C                 |
| 15 Acquired Size          | 32768               |
| 16 Spectral Size          | 65536               |

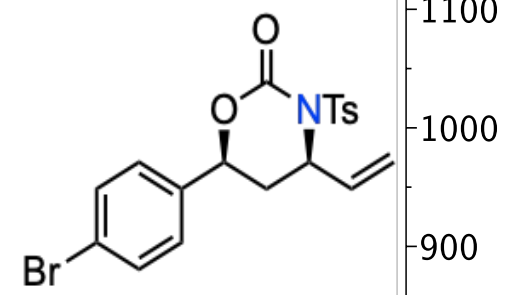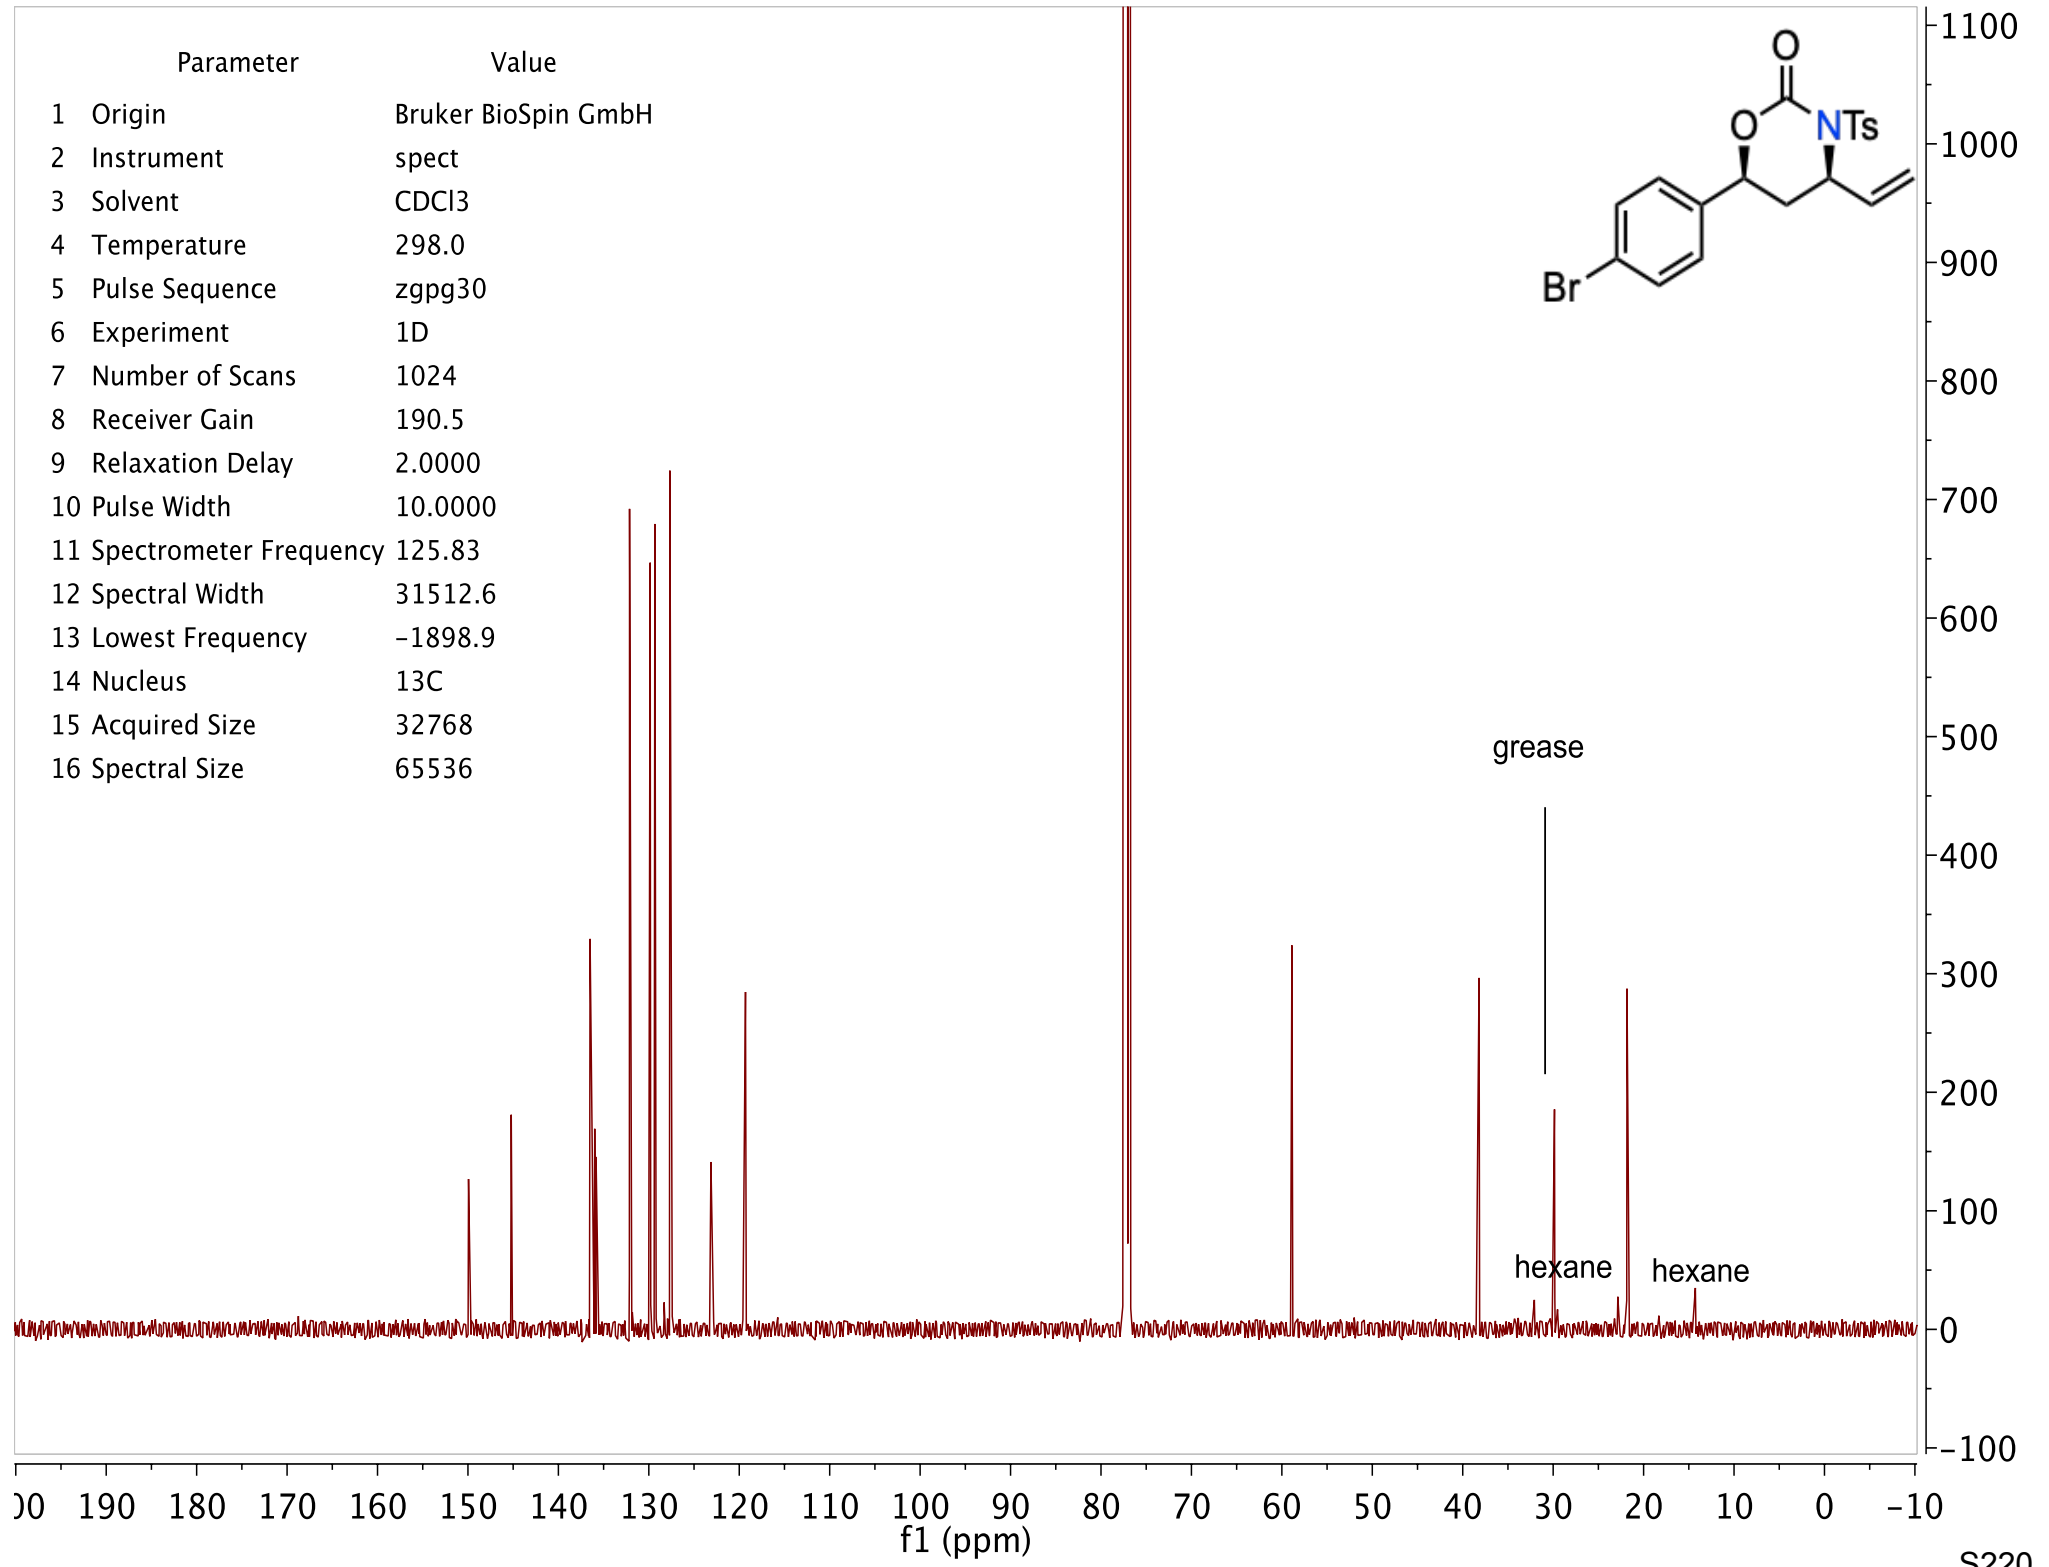

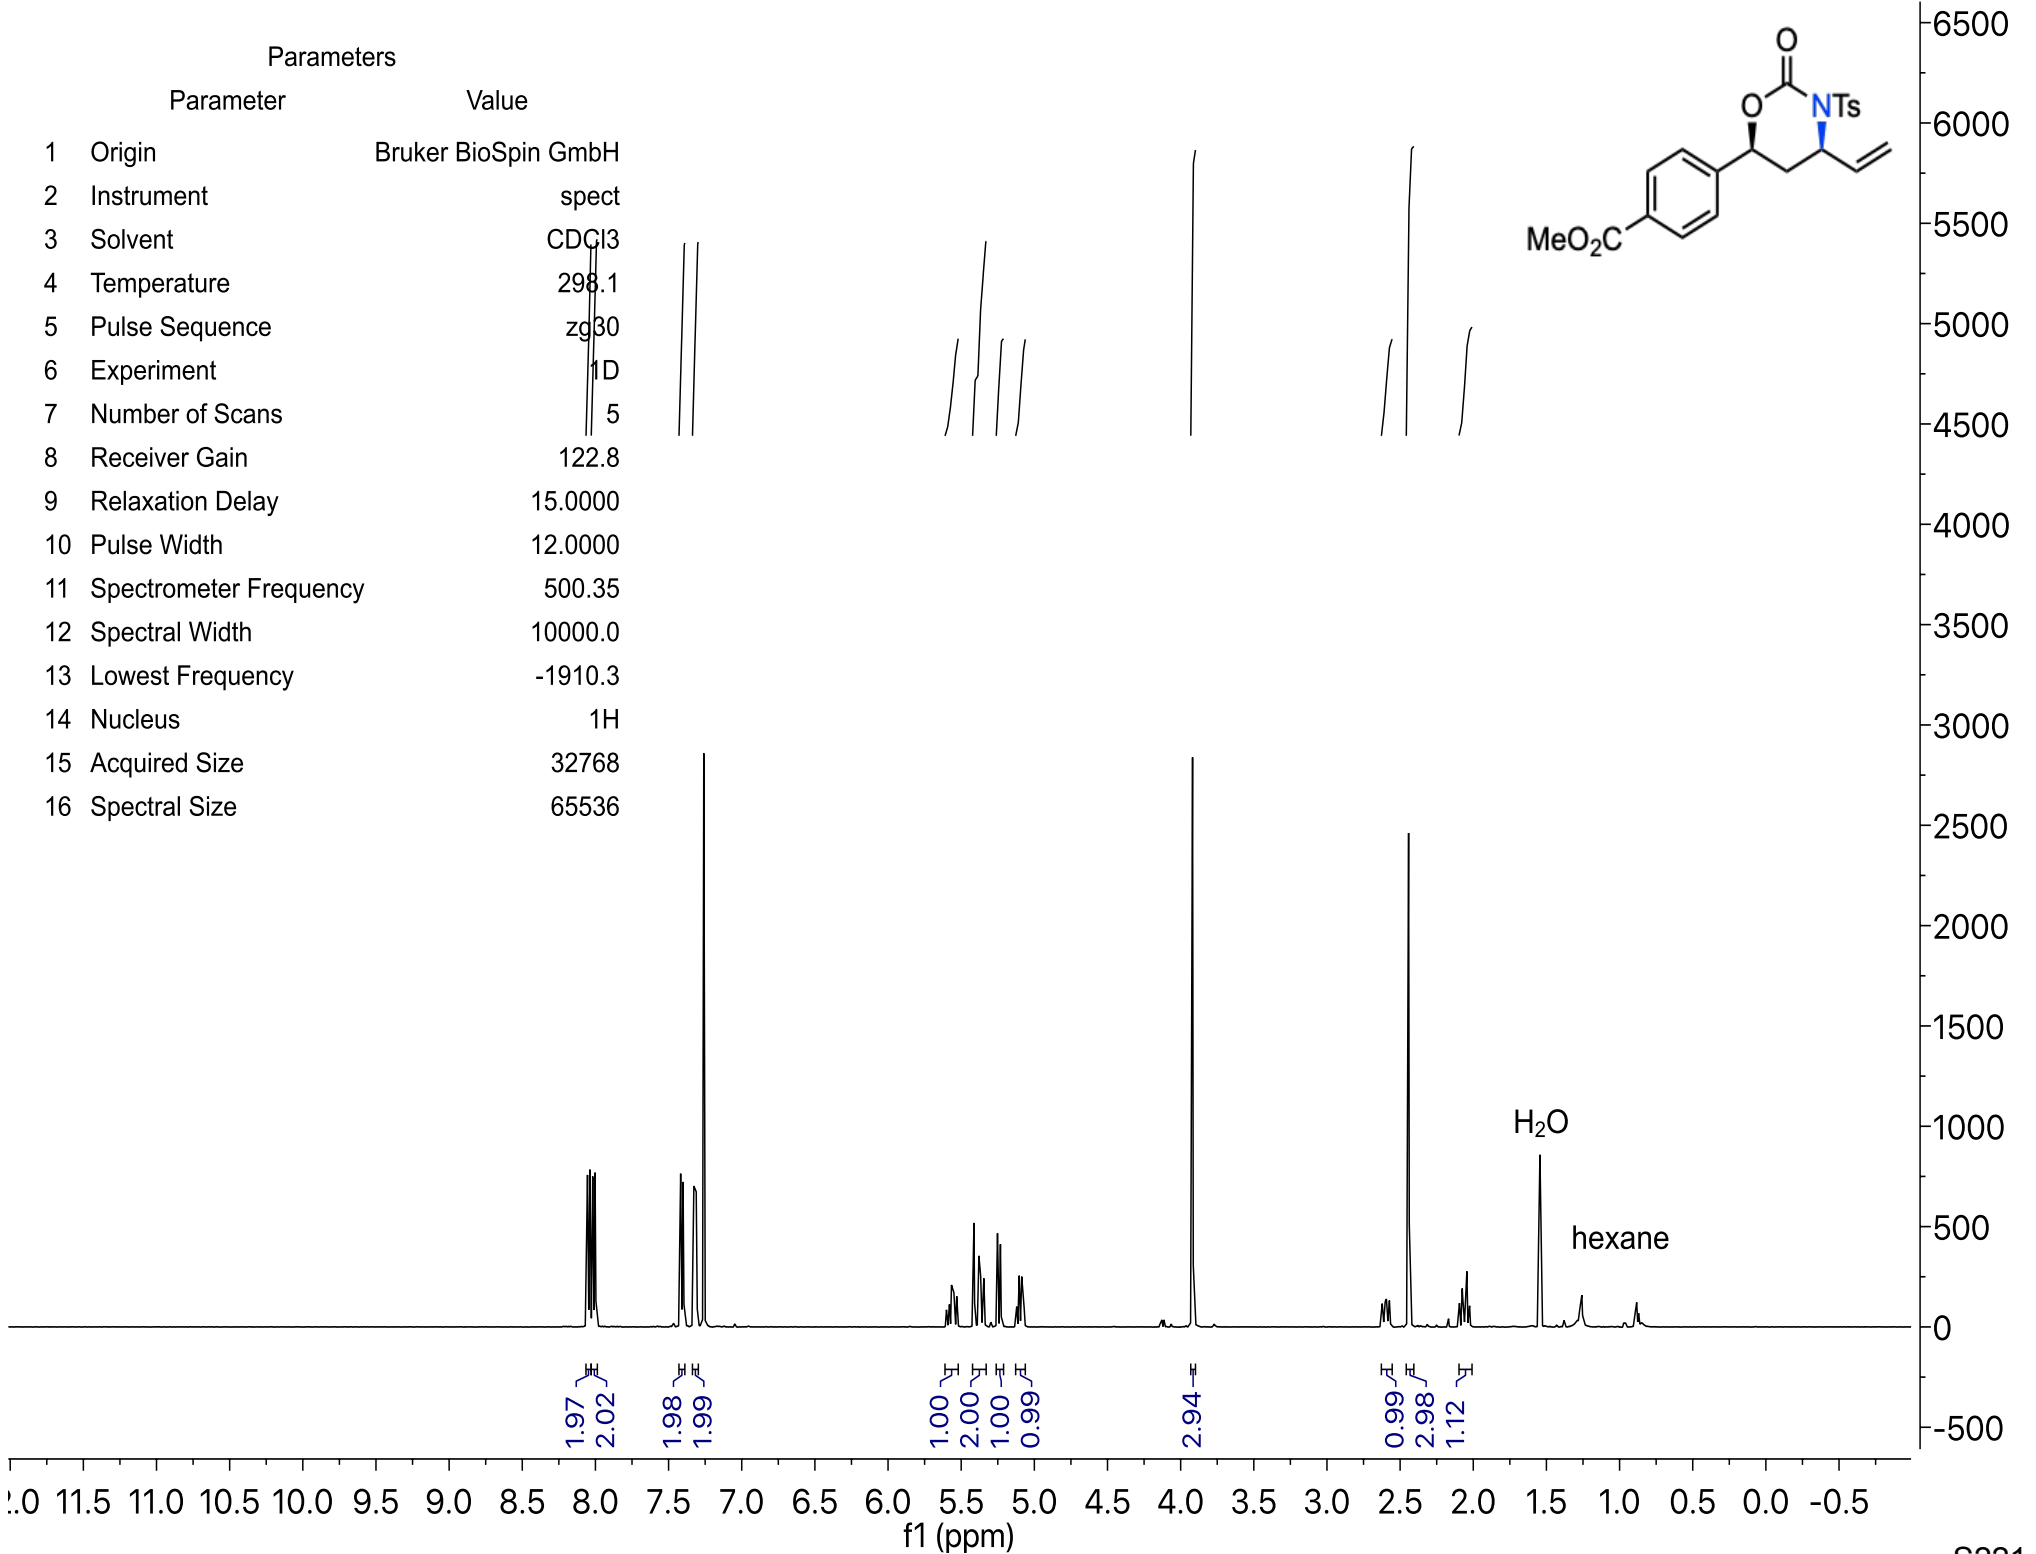

Parameters

| Parameter                 | Value               |
|---------------------------|---------------------|
| 1 Origin                  | Bruker BioSpin GmbH |
| 2 Instrument              | spect               |
| 3 Solvent                 | CDCl3               |
| 4 Temperature             | 298.2               |
| 5 Pulse Sequence          | zgpg30              |
| 6 Experiment              | 1D                  |
| 7 Number of Scans         | 512                 |
| 8 Receiver Gain           | 190.5               |
| 9 Relaxation Delay        | 1.0000              |
| 10 Pulse Width            | 10.0000             |
| 11 Spectrometer Frequency | 125.83              |
| 12 Spectral Width         | 31512.6             |
| 13 Lowest Frequency       | -1897.9             |
| 14 Nucleus                | <sup>13</sup> C     |
| 15 Acquired Size          | 32768               |
| 16 Spectral Size          | 65536               |

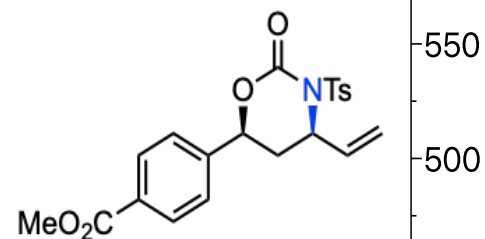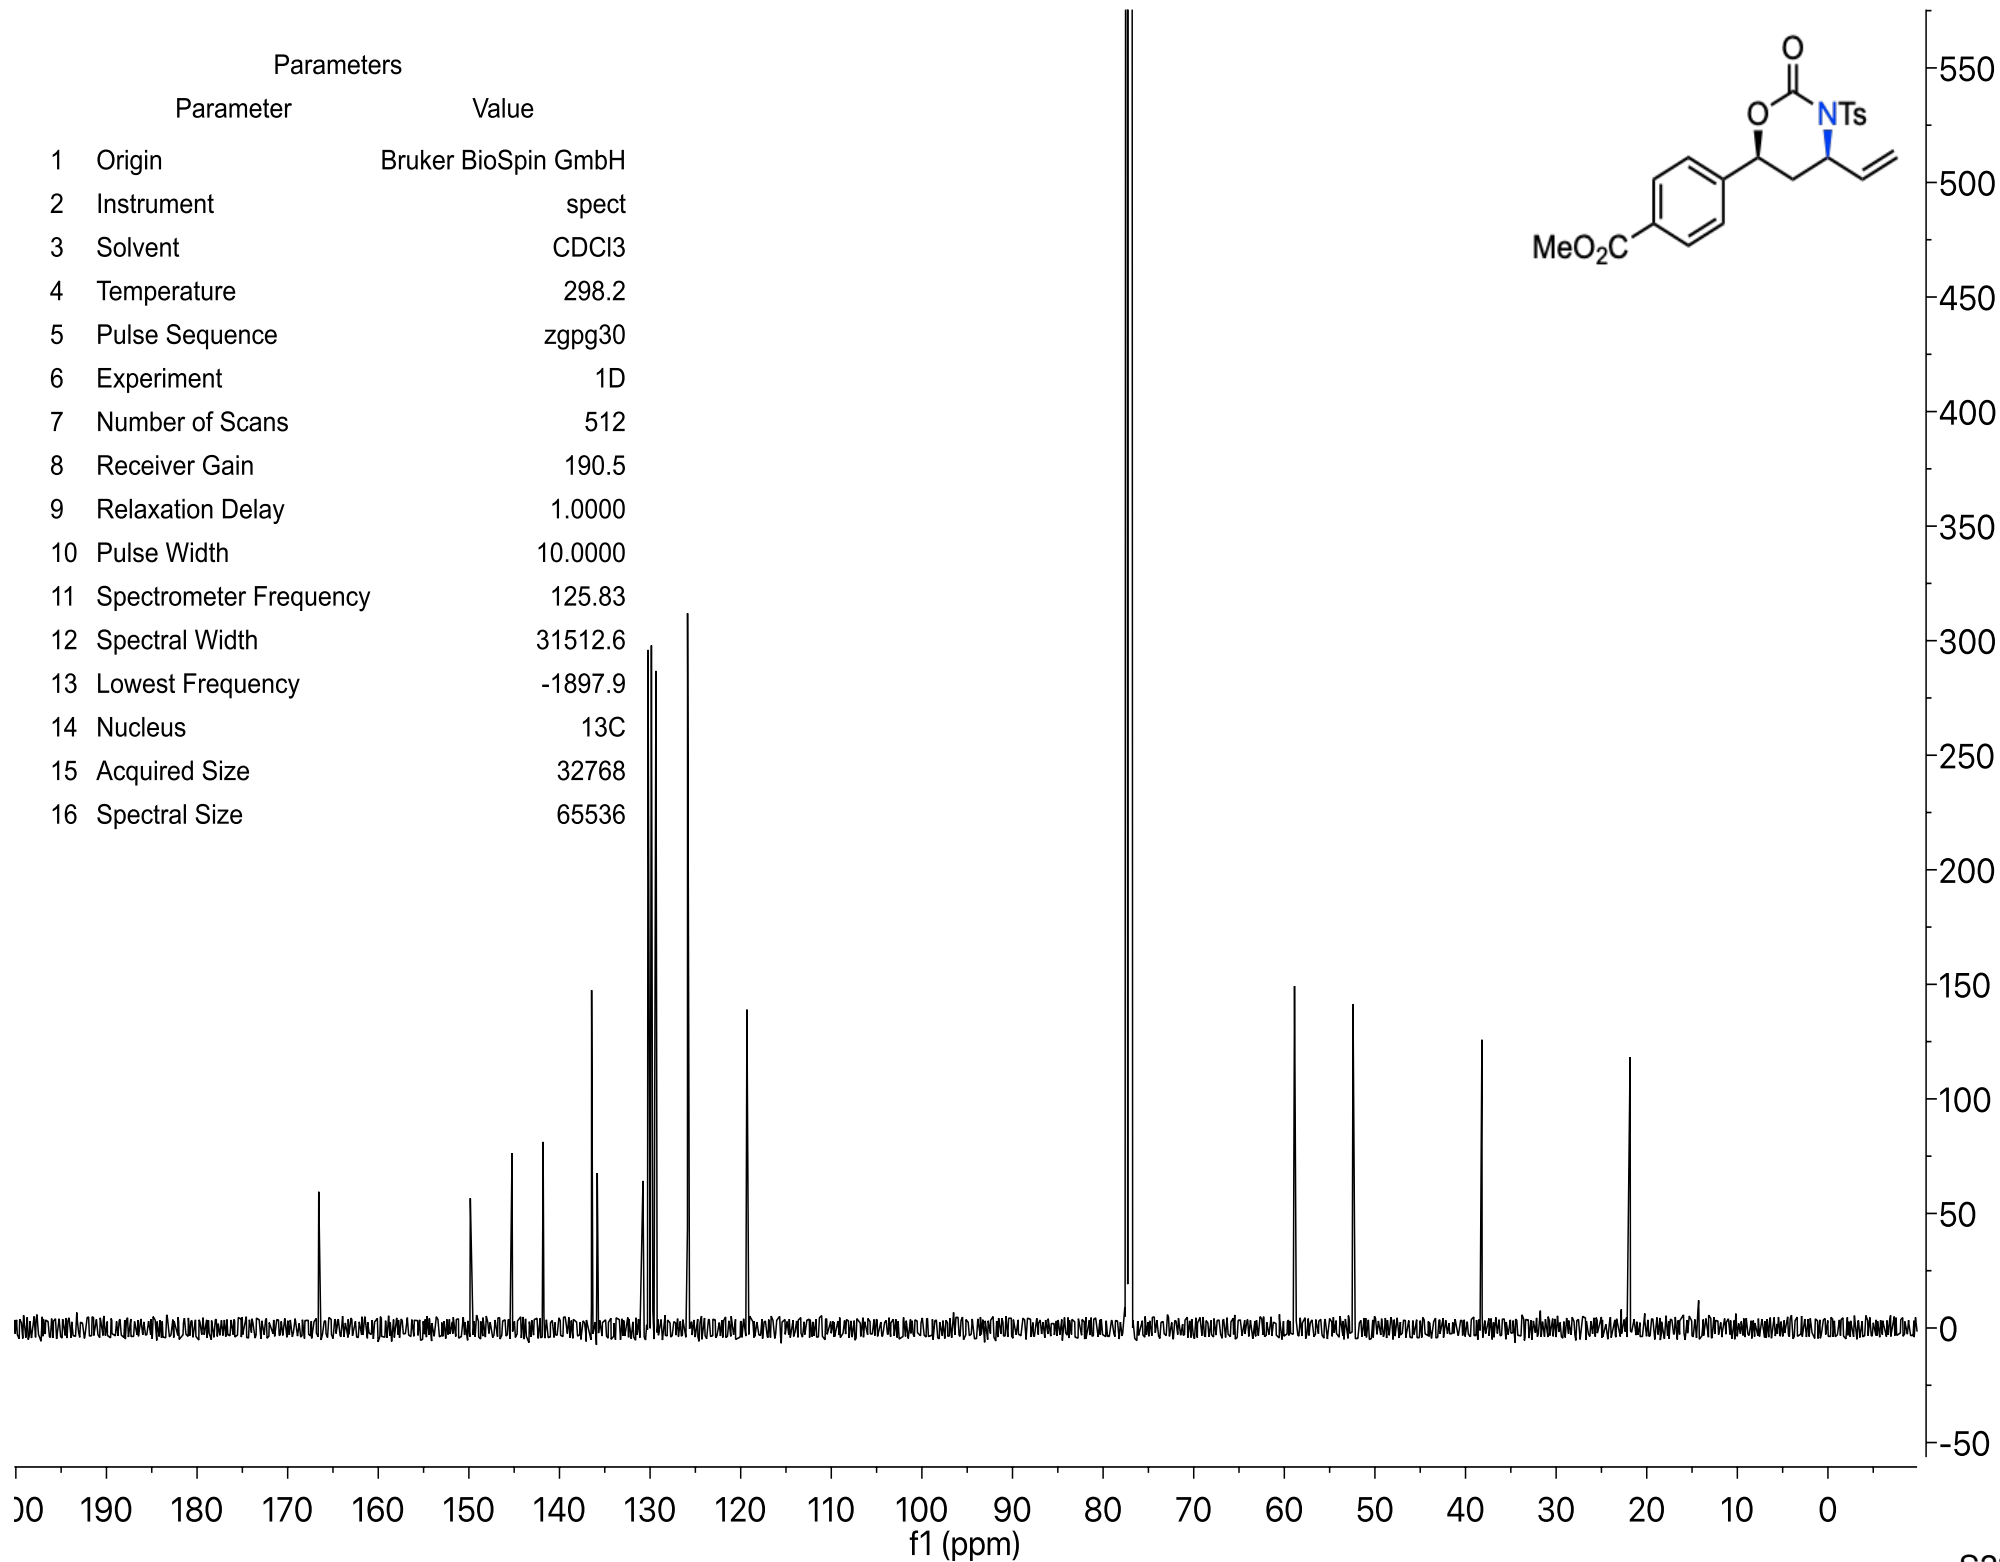



Parameters

| Parameter                 | Value               |
|---------------------------|---------------------|
| 1 Origin                  | Bruker BioSpin GmbH |
| 2 Instrument              | spect               |
| 3 Solvent                 | CDCl3               |
| 4 Temperature             | 298.2               |
| 5 Pulse Sequence          | zg30                |
| 6 Experiment              | 1D                  |
| 7 Number of Scans         | 5                   |
| 8 Receiver Gain           | 137.4               |
| 9 Relaxation Delay        | 15.0000             |
| 10 Pulse Width            | 12.0000             |
| 11 Spectrometer Frequency | 500.35              |
| 12 Spectral Width         | 10000.0             |
| 13 Lowest Frequency       | -1922.3             |
| 14 Nucleus                | 1H                  |
| 15 Acquired Size          | 32768               |
| 16 Spectral Size          | 65536               |

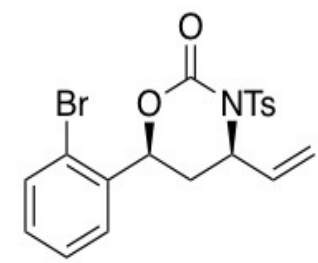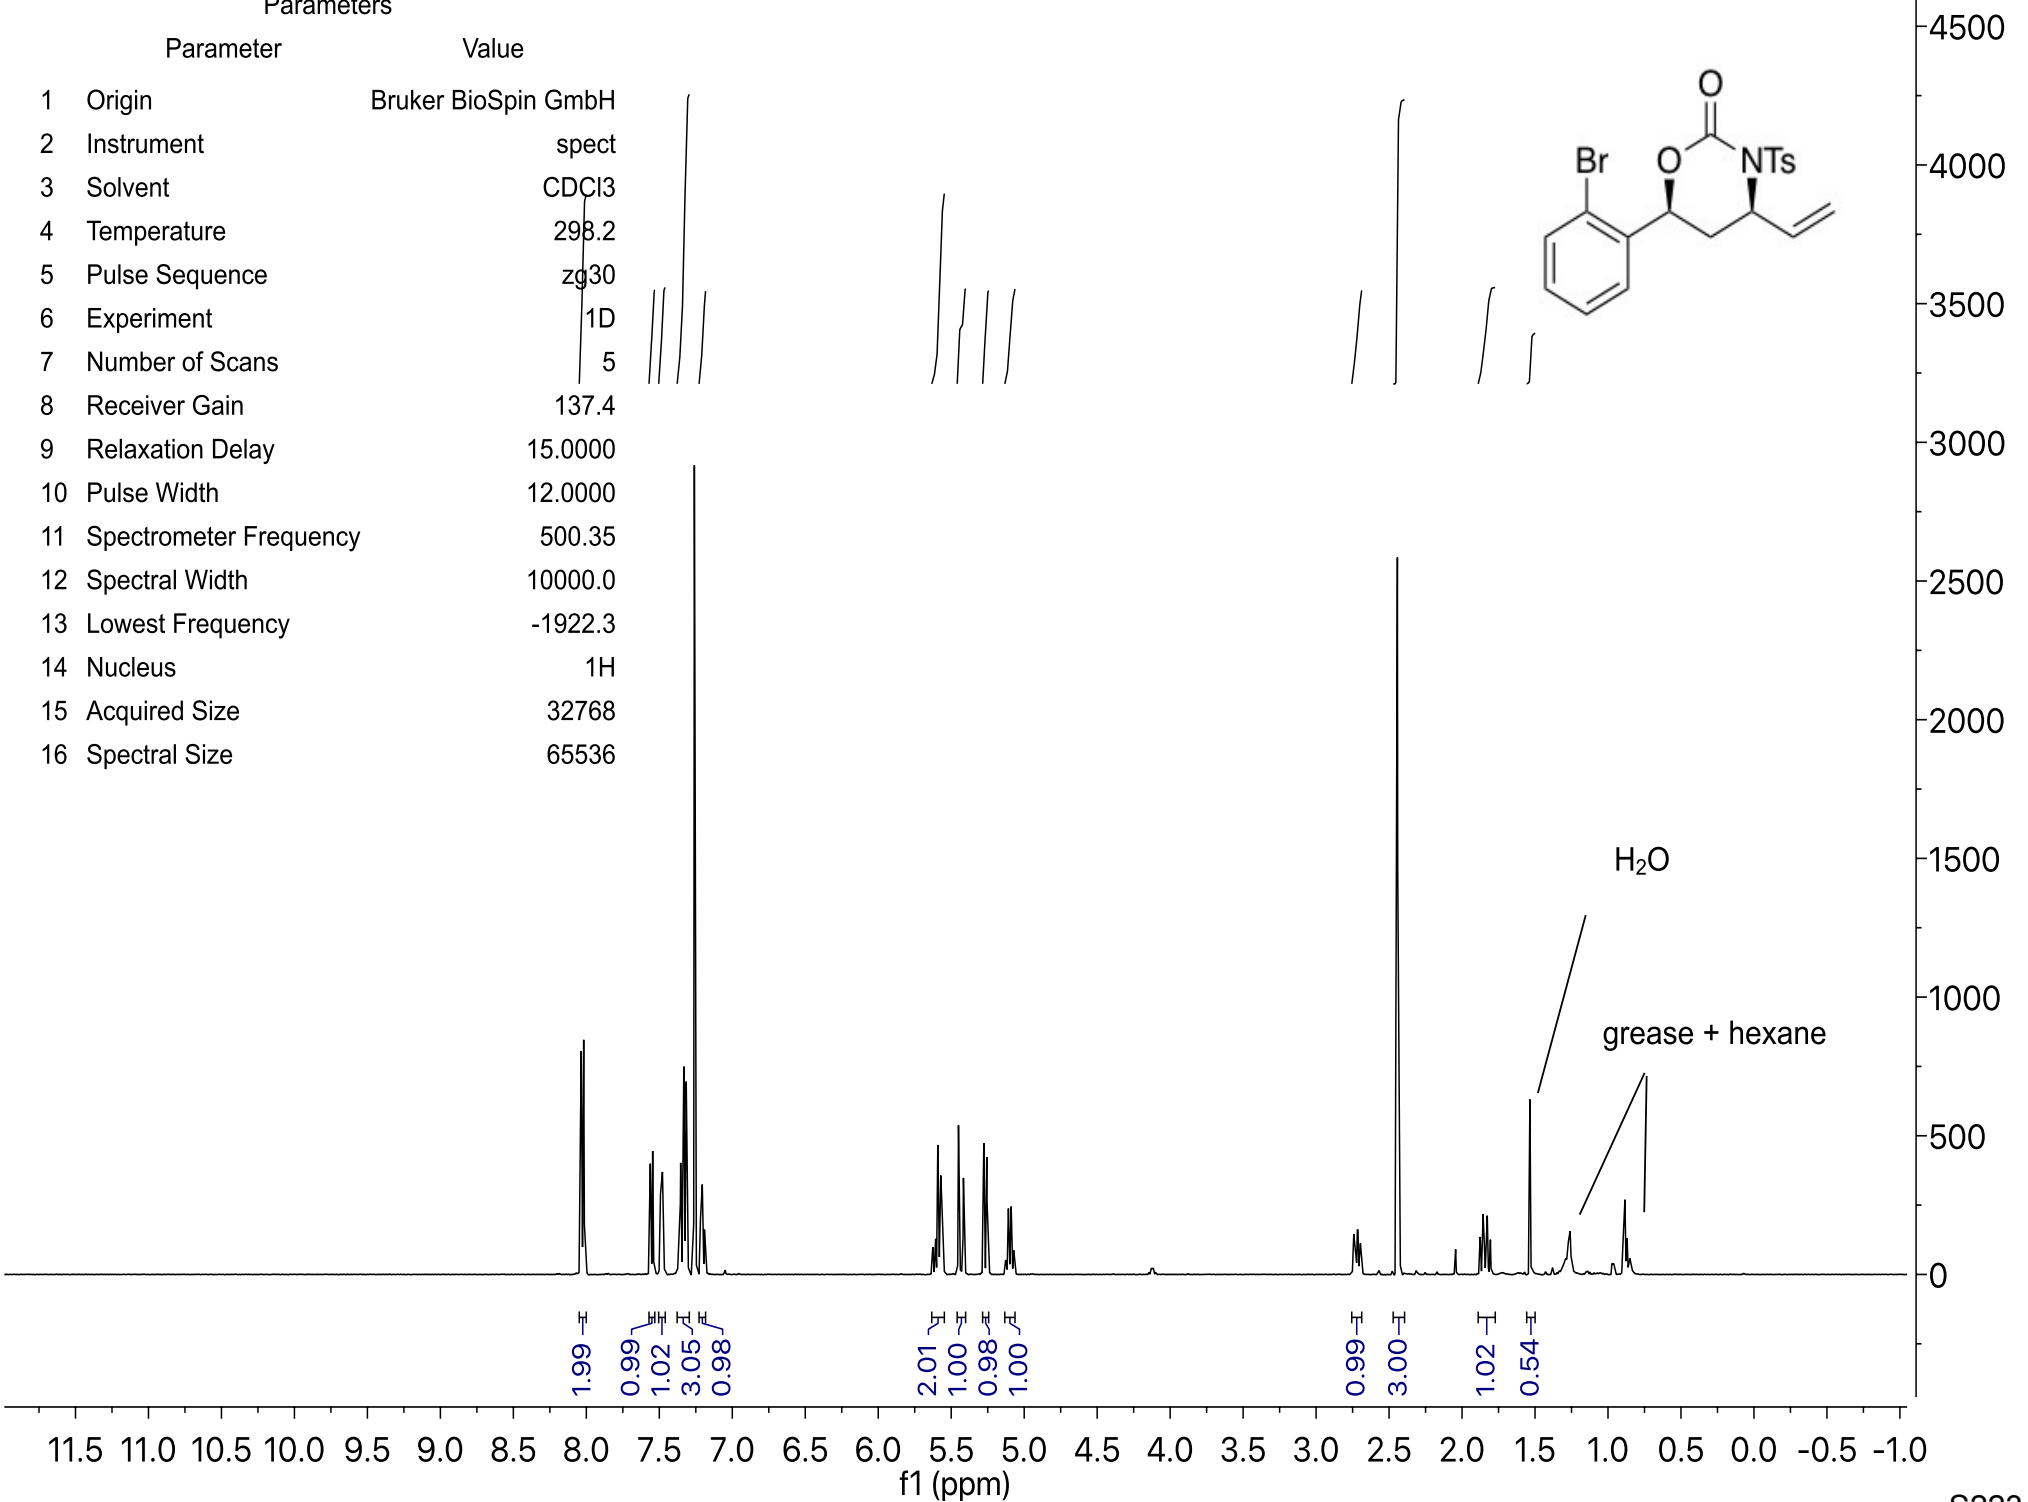

H<sub>2</sub>O

grease + hexane

Parameters

| Parameter                 | Value               |
|---------------------------|---------------------|
| 1 Origin                  | Bruker BioSpin GmbH |
| 2 Instrument              | spect               |
| 3 Solvent                 | CDCl3               |
| 4 Temperature             | 298.1               |
| 5 Pulse Sequence          | zgpg30              |
| 6 Experiment              | 1D                  |
| 7 Number of Scans         | 512                 |
| 8 Receiver Gain           | 190.5               |
| 9 Relaxation Delay        | 1.0000              |
| 10 Pulse Width            | 10.0000             |
| 11 Spectrometer Frequency | 125.83              |
| 12 Spectral Width         | 31512.6             |
| 13 Lowest Frequency       | -1897.4             |
| 14 Nucleus                | <sup>13</sup> C     |
| 15 Acquired Size          | 32768               |
| 16 Spectral Size          | 65536               |

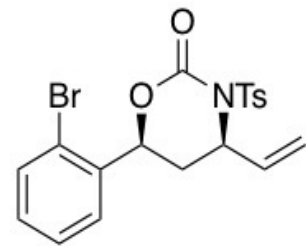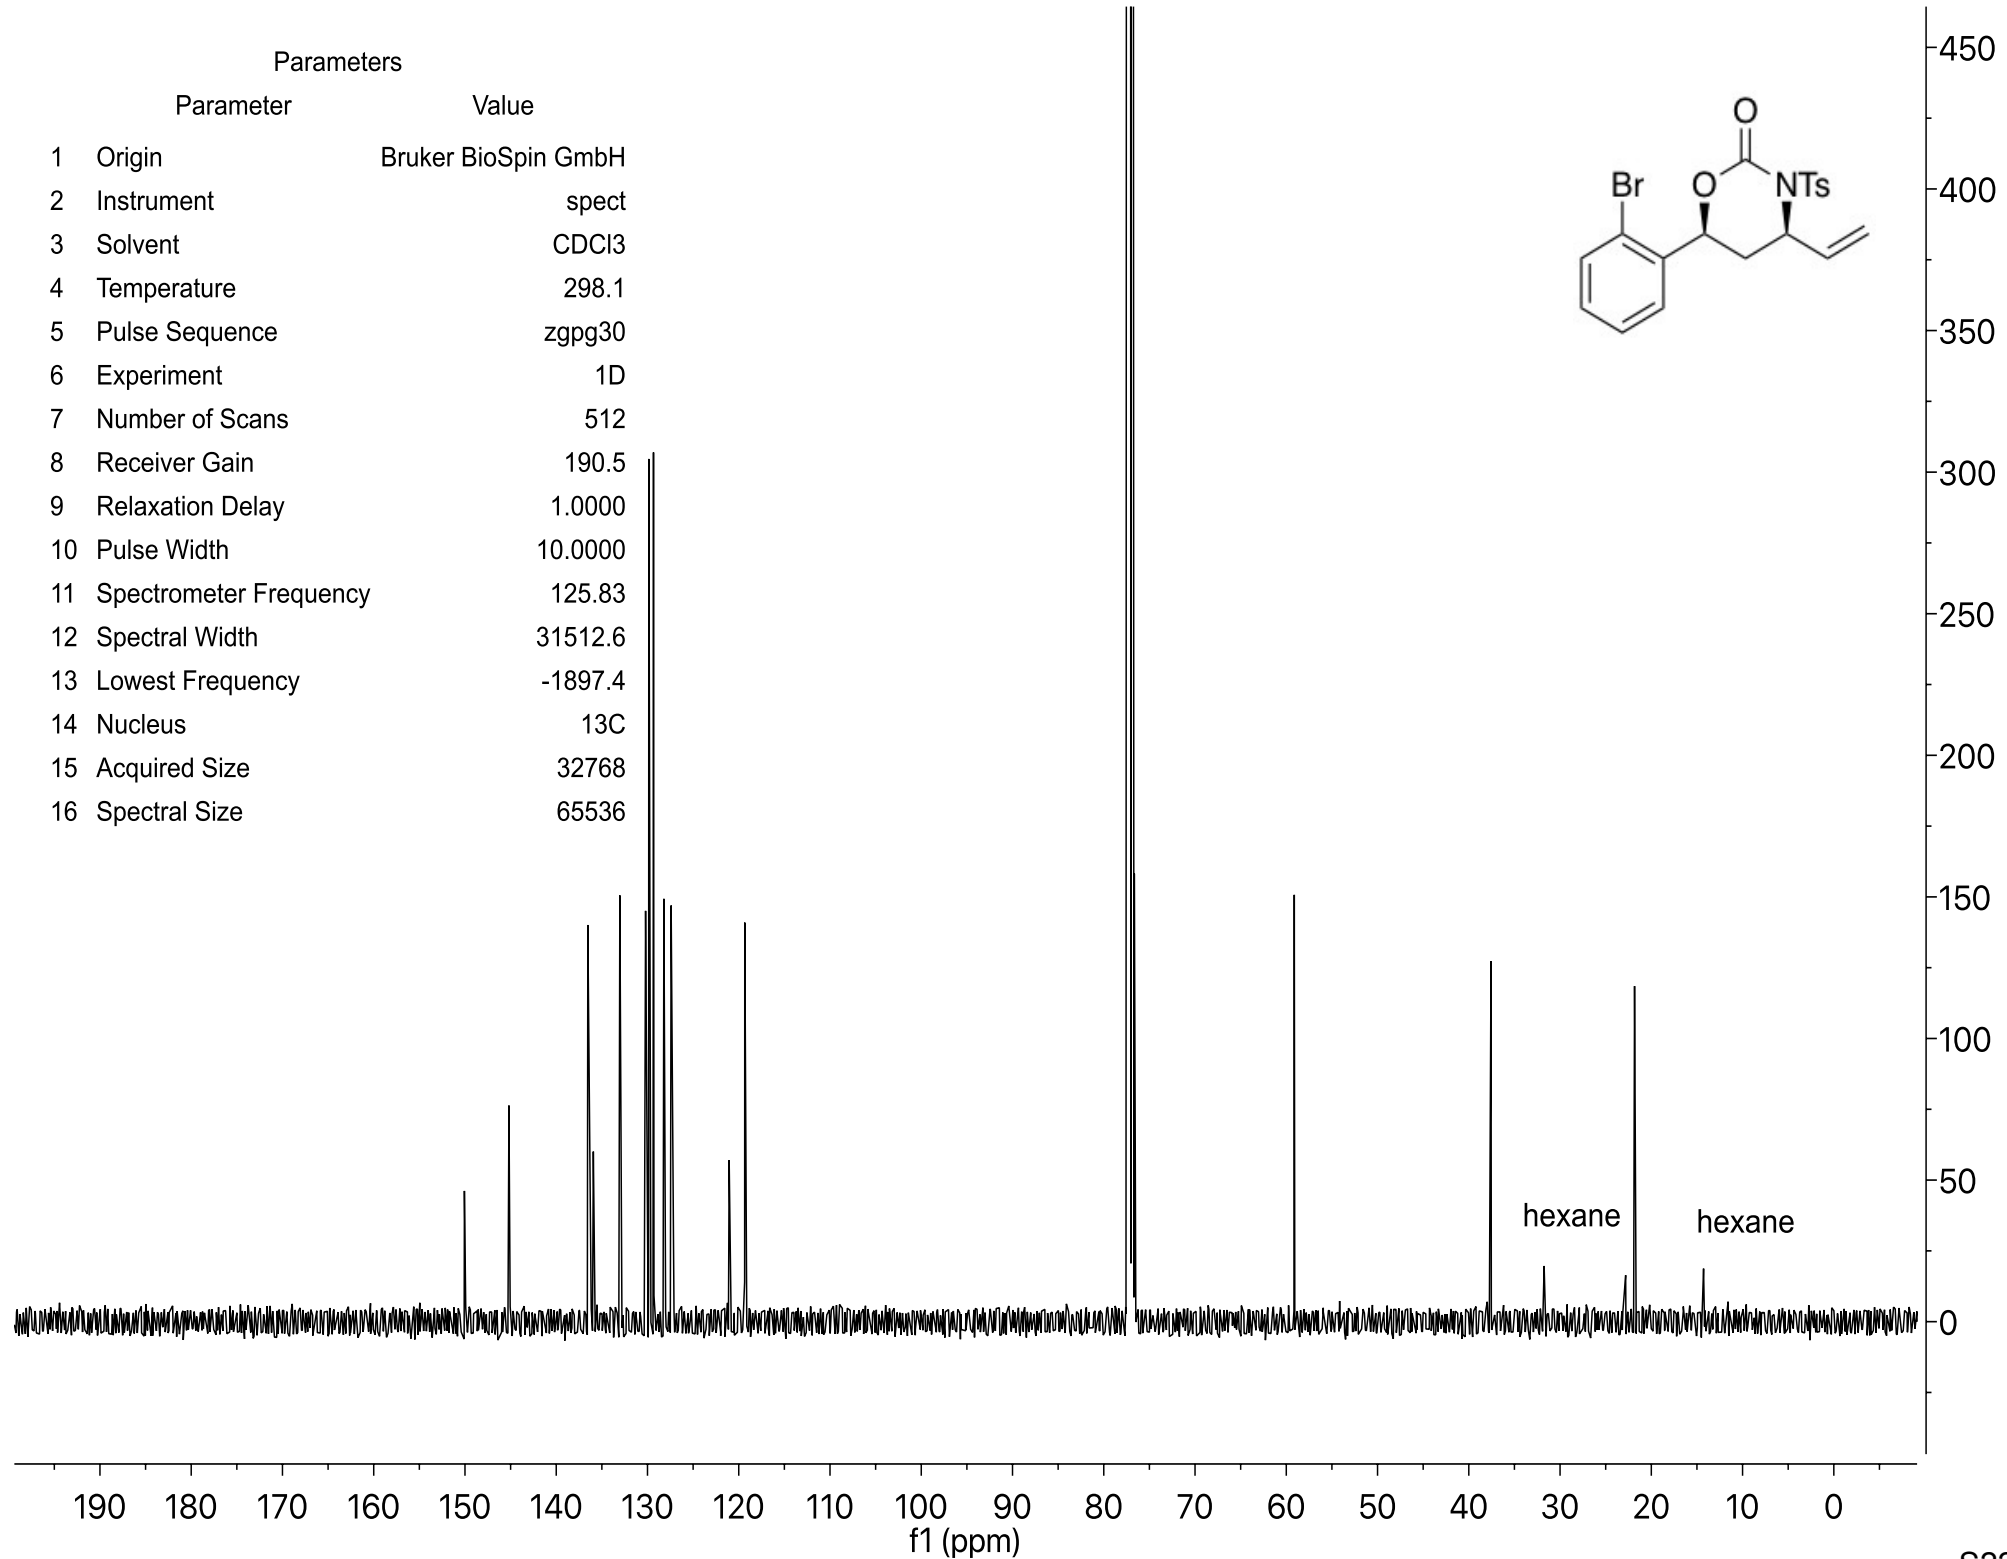

| Parameter                 | Value   |
|---------------------------|---------|
| 1 Origin                  | Varian  |
| 2 Instrument              | inova   |
| 3 Solvent                 | CDCl3   |
| 4 Temperature             | 20.0    |
| 5 Pulse Sequence          | s2pul   |
| 6 Experiment              | 1D      |
| 7 Number of Scans         | 8       |
| 8 Receiver Gain           | 56      |
| 9 Relaxation Delay        | 15.0000 |
| 10 Pulse Width            | 6.5000  |
| 11 Spectrometer Frequency | 499.69  |
| 12 Spectral Width         | 7024.9  |
| 13 Lowest Frequency       | -1021.9 |
| 14 Nucleus                | 1H      |
| 15 Acquired Size          | 32768   |
| 16 Spectral Size          | 65536   |

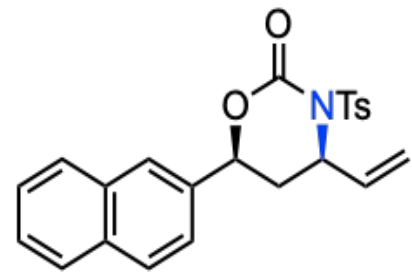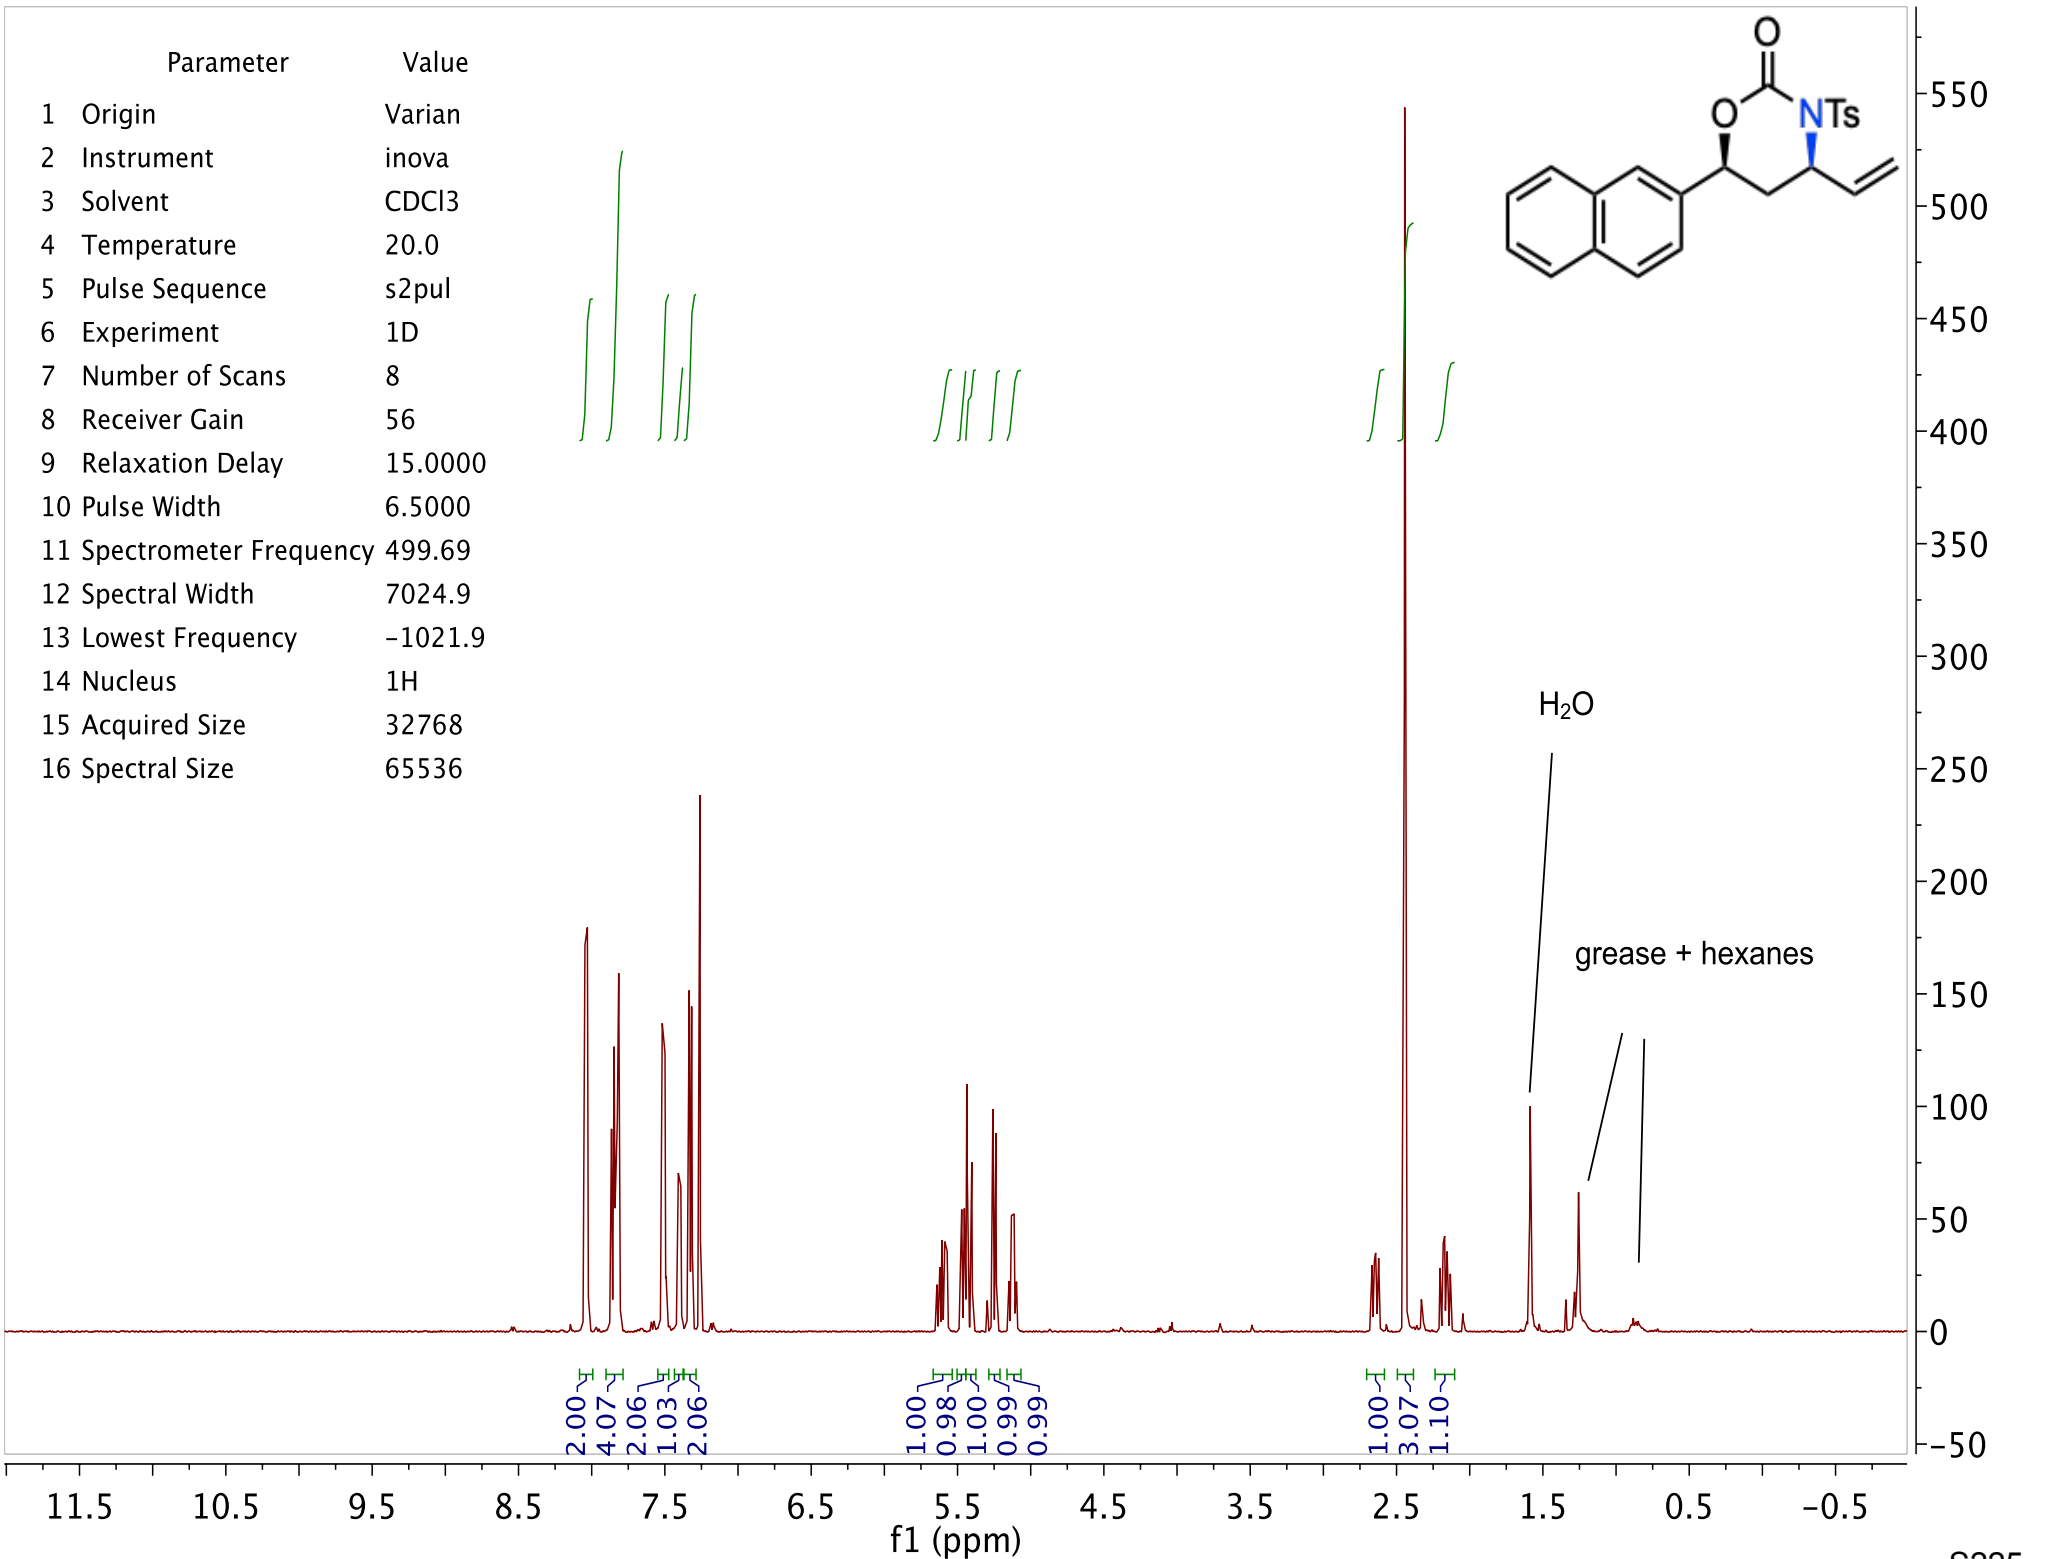

| Parameter                 | Value   |
|---------------------------|---------|
| 1 Origin                  | Varian  |
| 2 Instrument              | inova   |
| 3 Solvent                 | CDCl3   |
| 4 Temperature             | 20.0    |
| 5 Pulse Sequence          | s2pul   |
| 6 Experiment              | 1D      |
| 7 Number of Scans         | 16800   |
| 8 Receiver Gain           | 60      |
| 9 Relaxation Delay        | 1.0000  |
| 10 Pulse Width            | 6.0000  |
| 11 Spectrometer Frequency | 125.66  |
| 12 Spectral Width         | 30165.9 |
| 13 Lowest Frequency       | -1274.1 |
| 14 Nucleus                | 13C     |
| 15 Acquired Size          | 32768   |
| 16 Spectral Size          | 65536   |

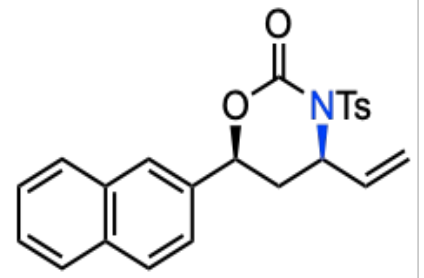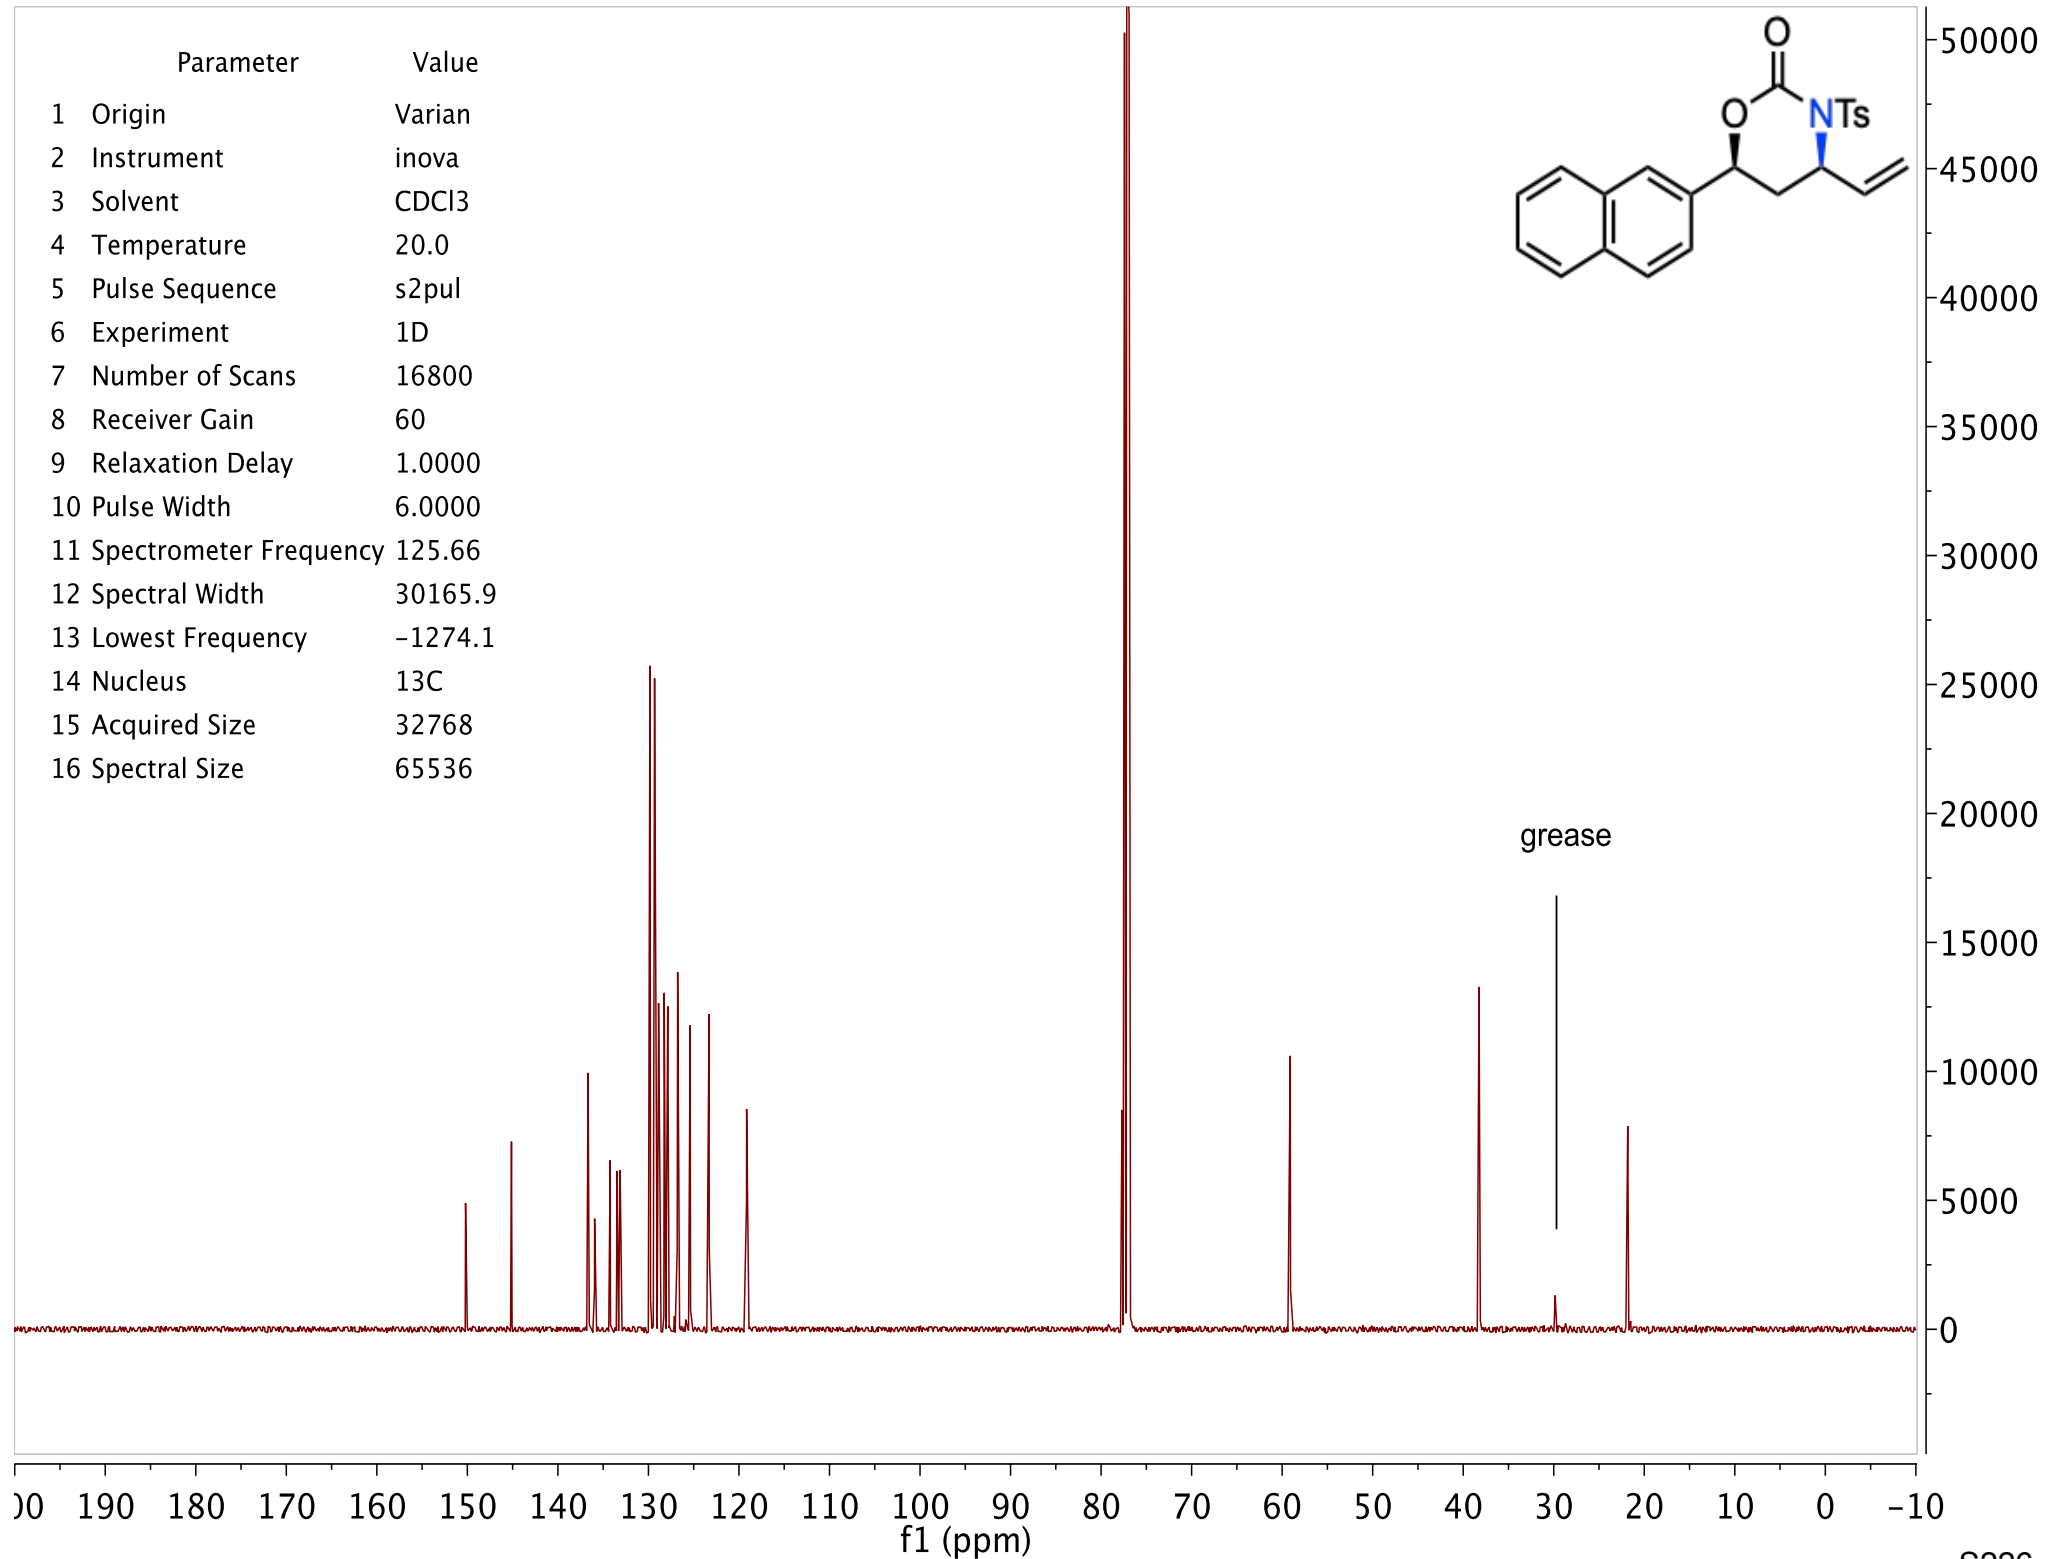

155-115ppm

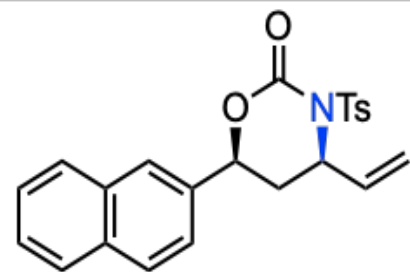

150

145

140

135  
f1 (ppm)

130

125

120

115

S227

50000

45000

40000

35000

30000

25000

20000

15000

10000

5000

0

| Parameter                 | Value               |
|---------------------------|---------------------|
| 1 Origin                  | Bruker BioSpin GmbH |
| 2 Instrument              | spect               |
| 3 Solvent                 | CDCl3               |
| 4 Temperature             | 289.2               |
| 5 Pulse Sequence          | zg30                |
| 6 Experiment              | 1D                  |
| 7 Number of Scans         | 16                  |
| 8 Receiver Gain           | 55.0                |
| 9 Relaxation Delay        | 15.0000             |
| 10 Pulse Width            | 12.0000             |
| 11 Spectrometer Frequency | 500.35              |
| 12 Spectral Width         | 10000.0             |
| 13 Lowest Frequency       | -1921.3             |
| 14 Nucleus                | 1H                  |
| 15 Acquired Size          | 32768               |
| 16 Spectral Size          | 65536               |

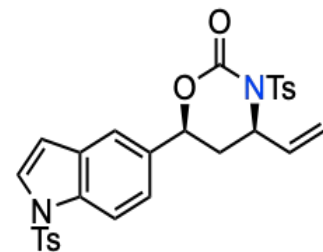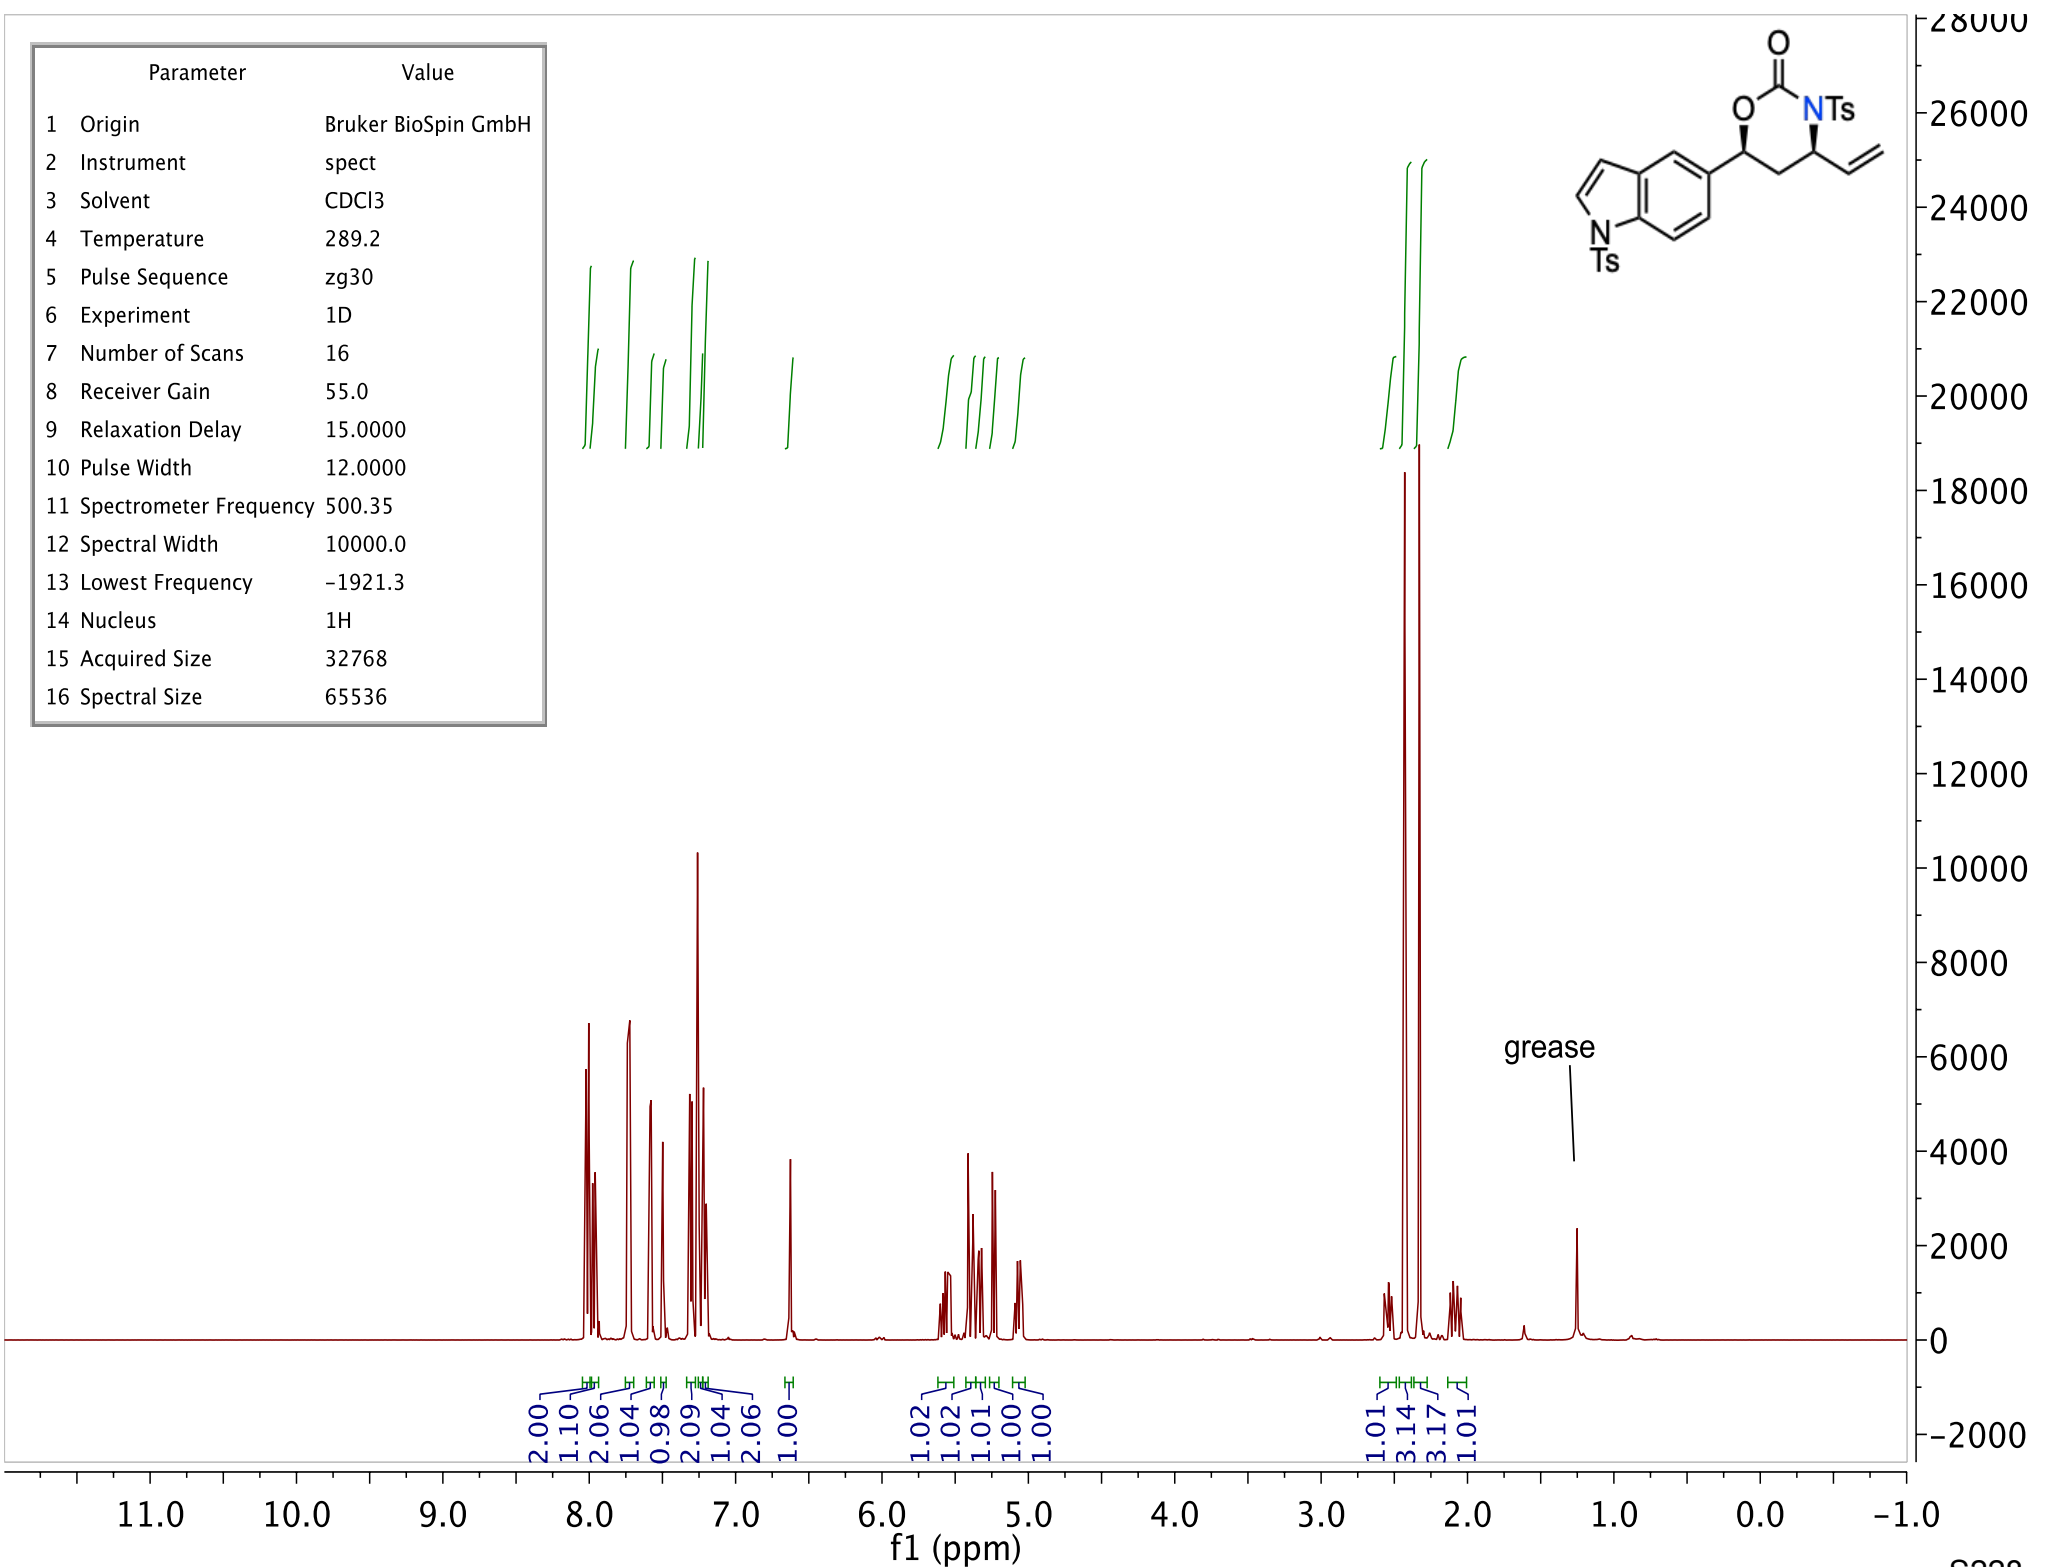

| Parameter                 | Value               |
|---------------------------|---------------------|
| 1 Origin                  | Bruker BioSpin GmbH |
| 2 Instrument              | spect               |
| 3 Solvent                 | CDCl3               |
| 4 Temperature             | 289.0               |
| 5 Pulse Sequence          | zgpg30              |
| 6 Experiment              | 1D                  |
| 7 Number of Scans         | 2048                |
| 8 Receiver Gain           | 190.5               |
| 9 Relaxation Delay        | 2.0000              |
| 10 Pulse Width            | 10.0000             |
| 11 Spectrometer Frequency | 125.83              |
| 12 Spectral Width         | 31512.6             |
| 13 Lowest Frequency       | -1916.9             |
| 14 Nucleus                | 13C                 |
| 15 Acquired Size          | 32768               |
| 16 Spectral Size          | 65536               |

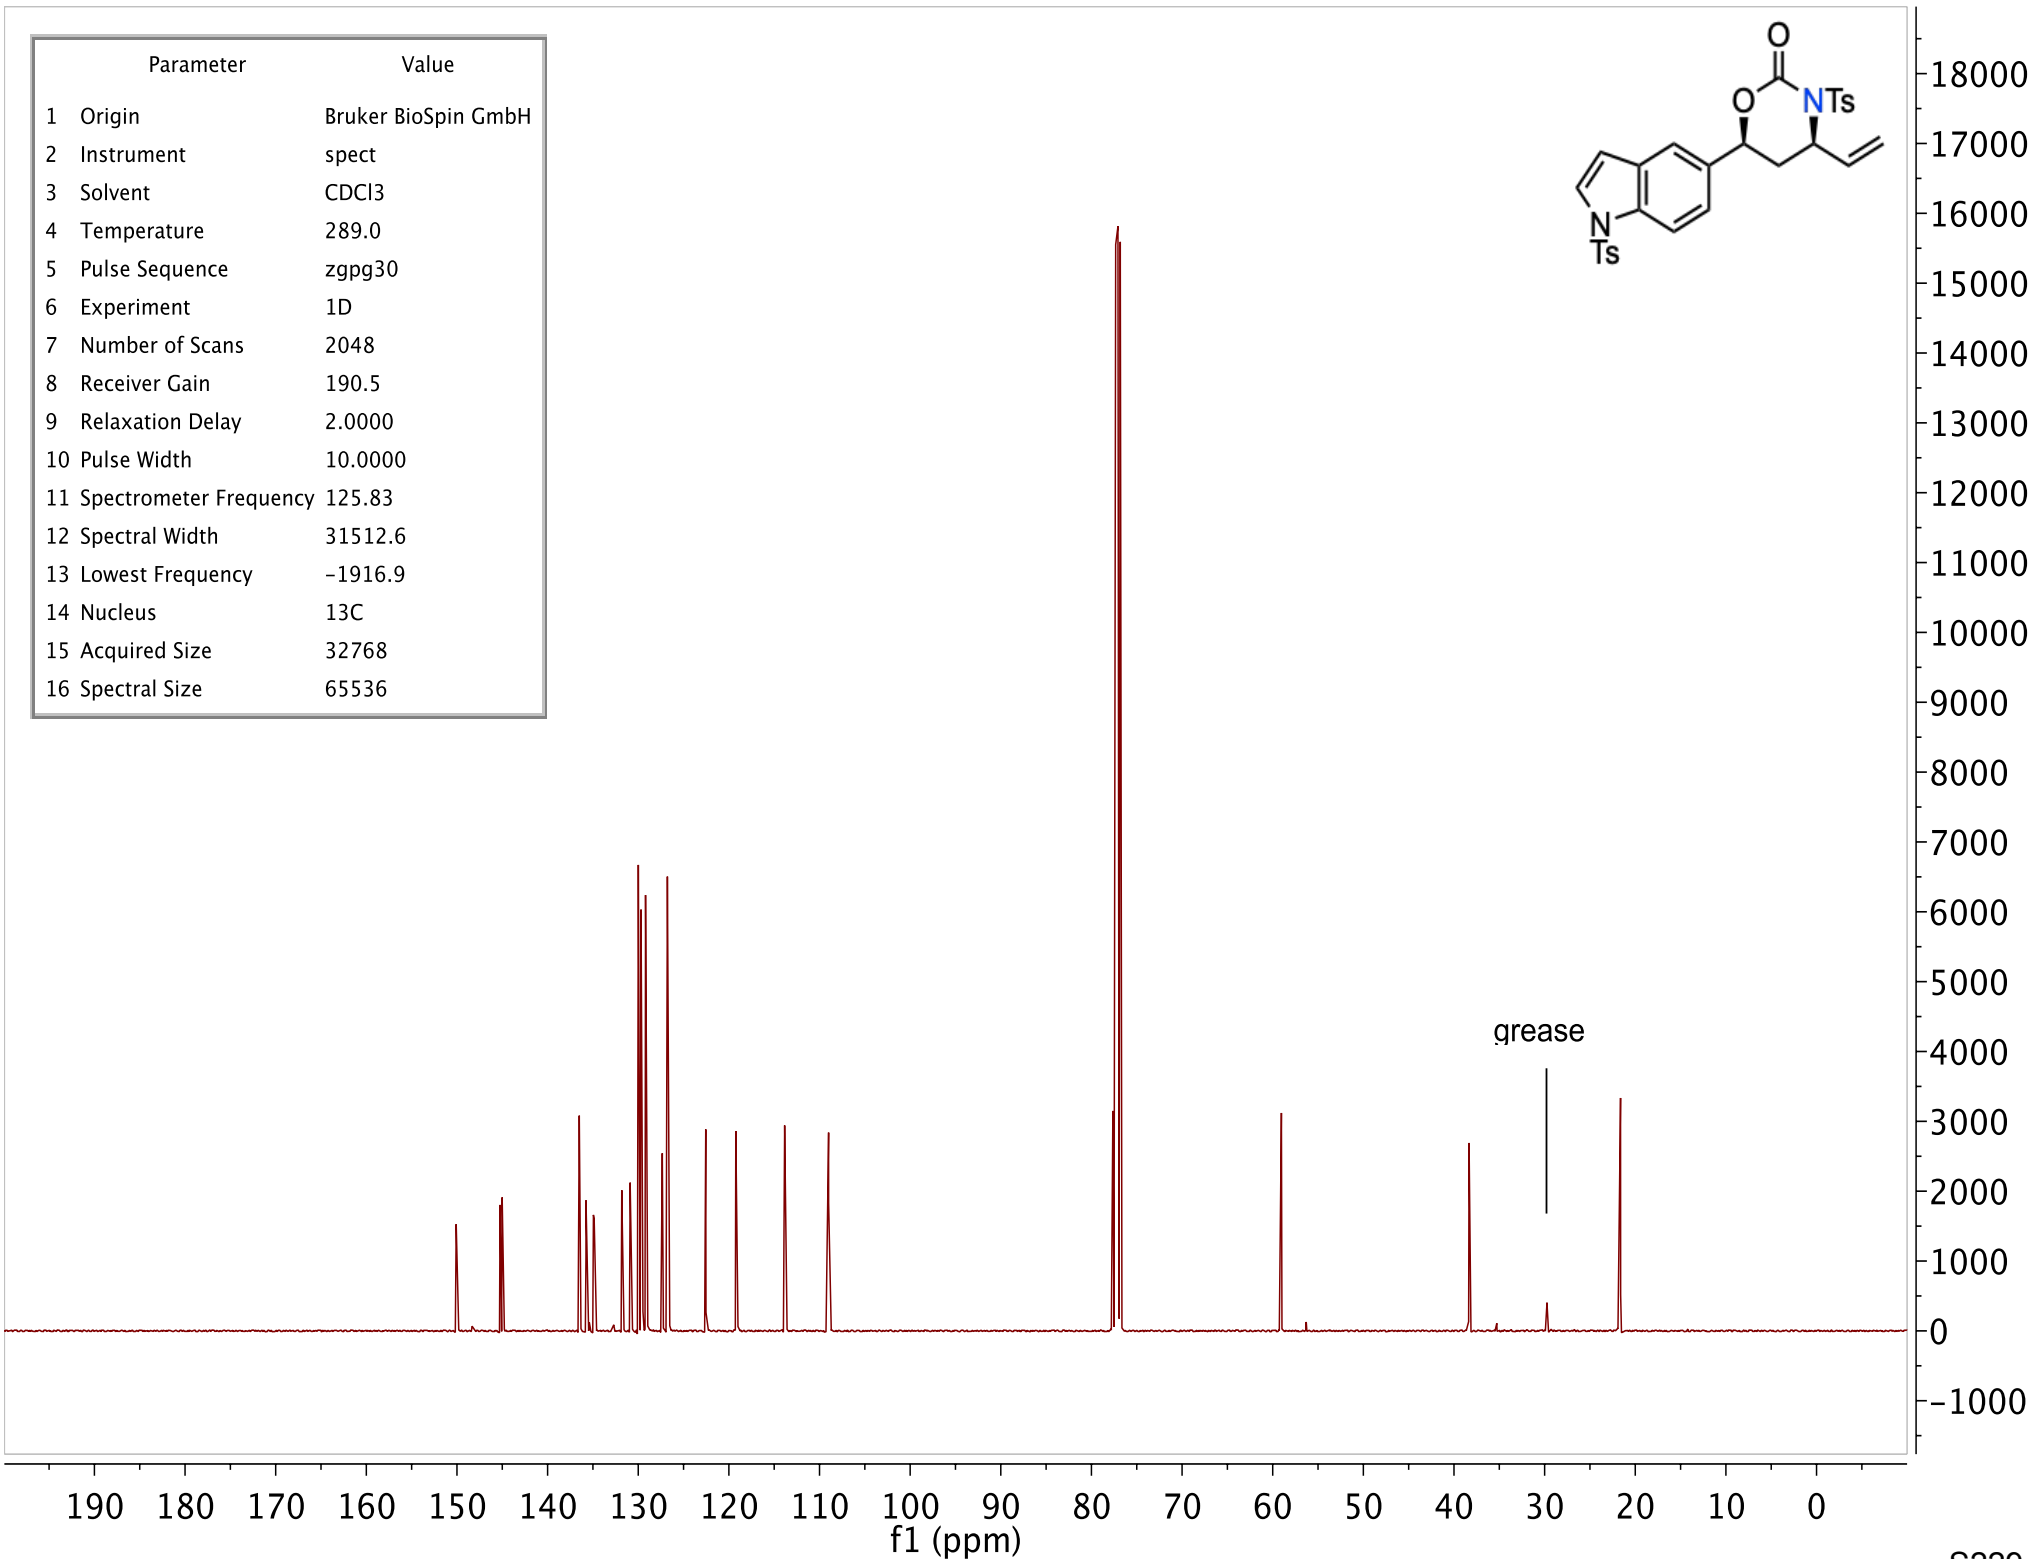

160-100 ppm

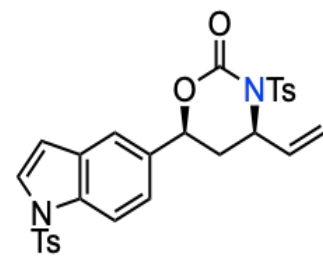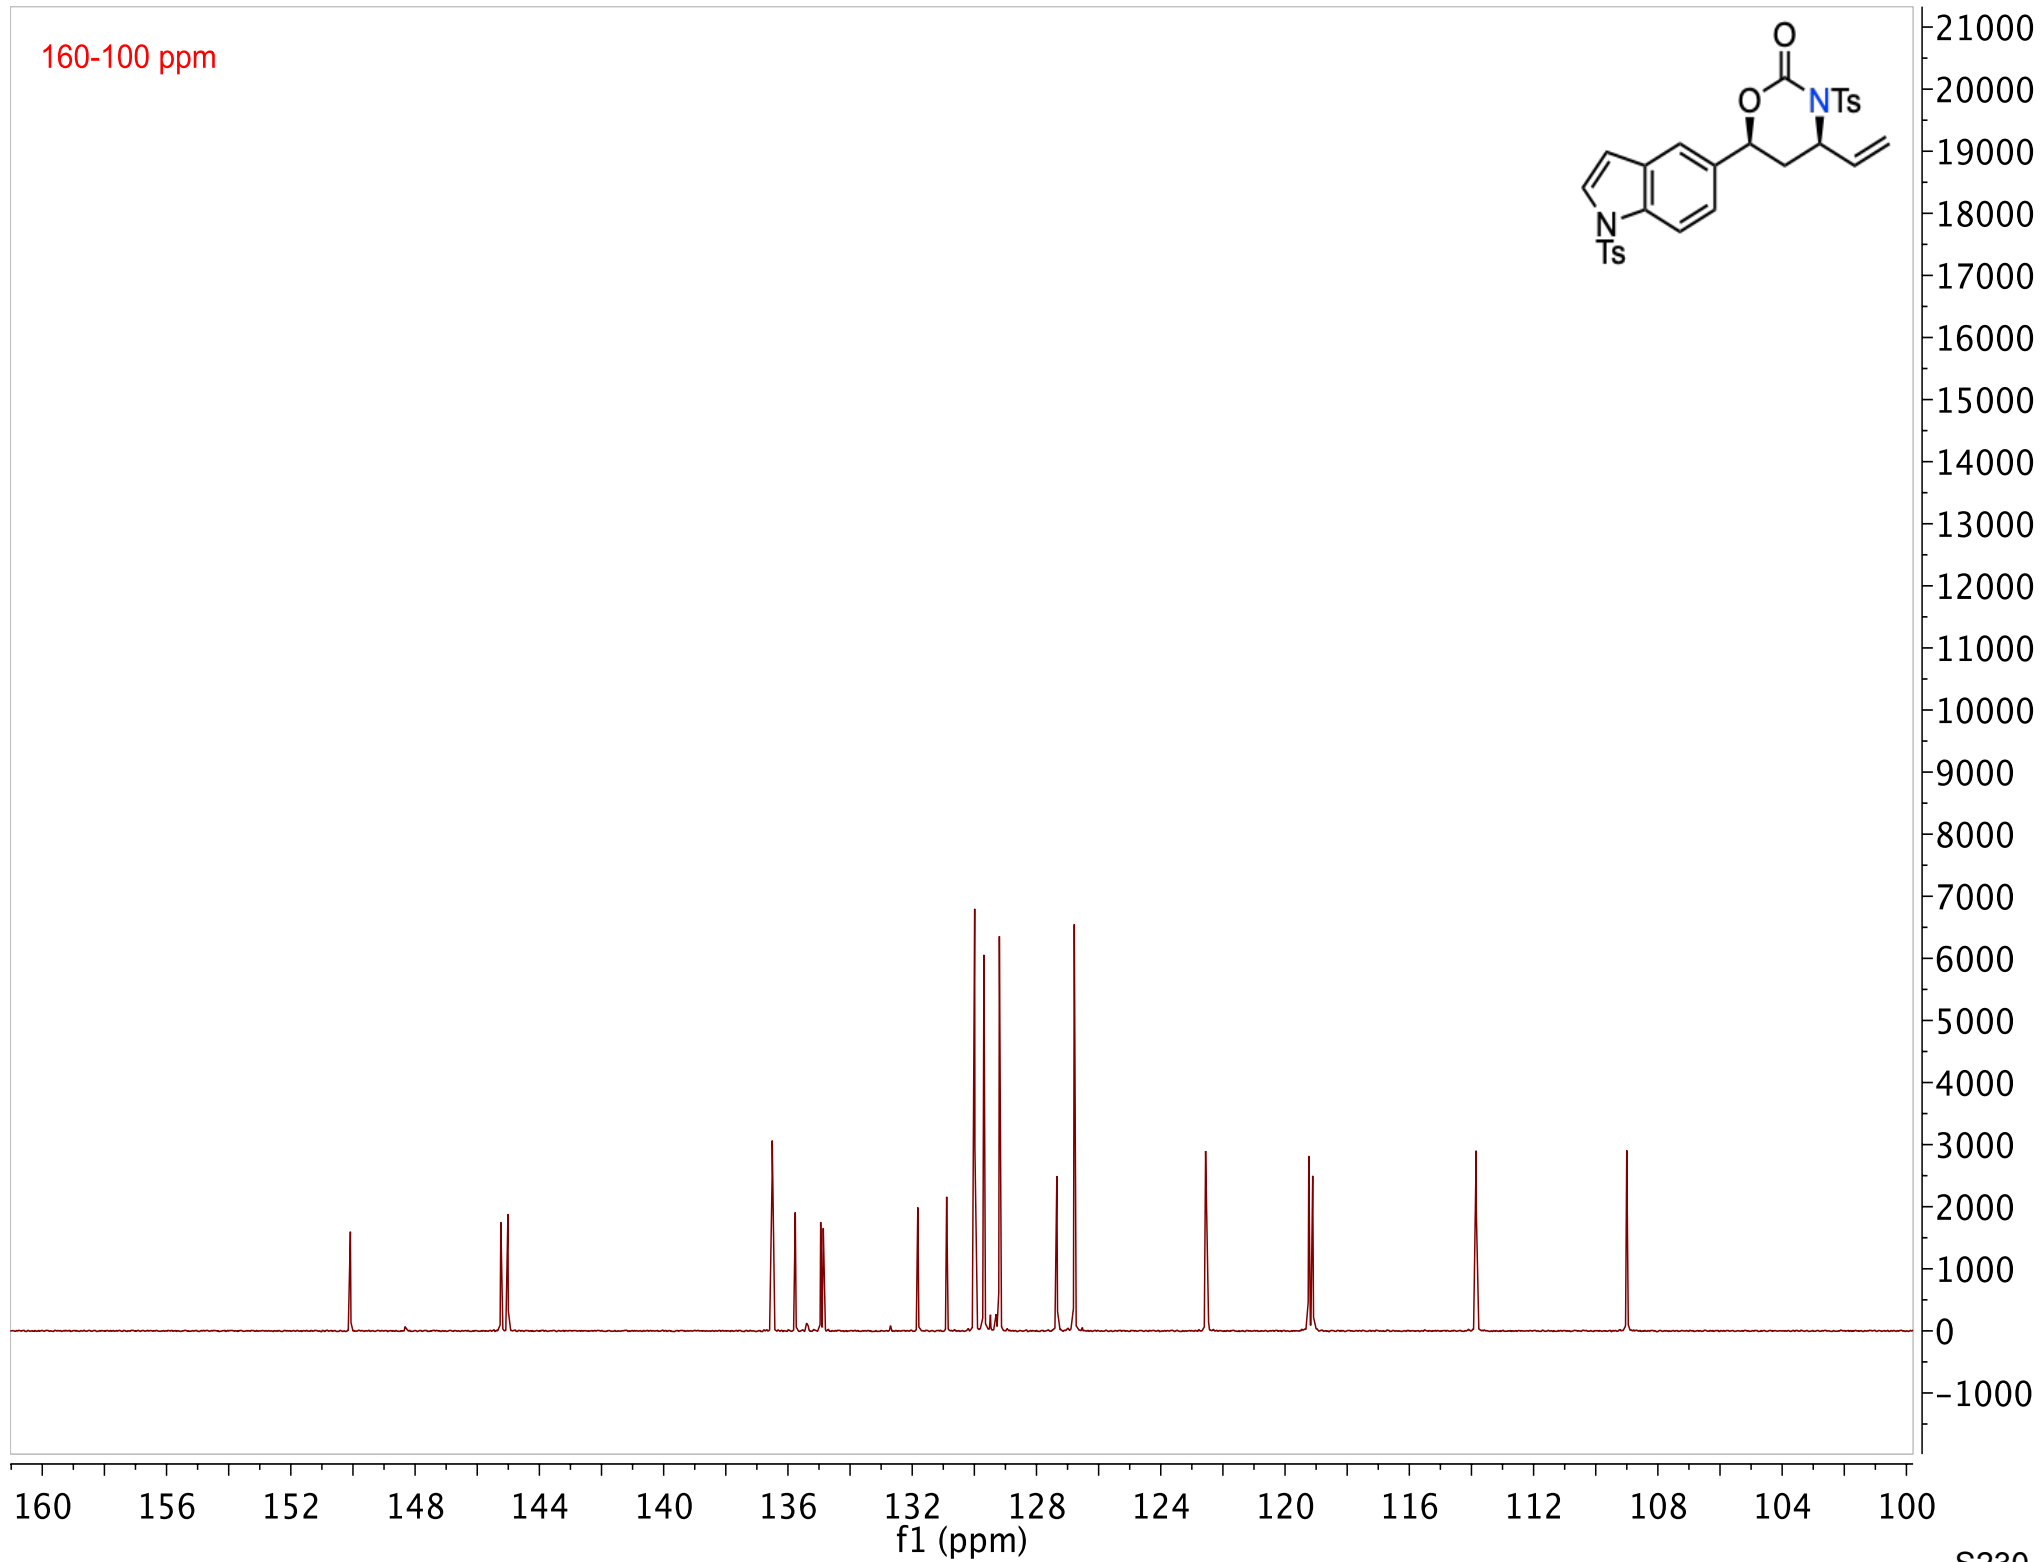



| Parameter                 | Value               |
|---------------------------|---------------------|
| 1 Origin                  | Bruker BioSpin GmbH |
| 2 Spectrometer            | spect               |
| 3 Solvent                 | CDCl3               |
| 4 Temperature             | 296.2               |
| 5 Pulse Sequence          | zg30                |
| 6 Experiment              | 1D                  |
| 7 Number of Scans         | 6                   |
| 8 Receiver Gain           | 94                  |
| 9 Relaxation Delay        | 15.0000             |
| 10 Pulse Width            | 12.0000             |
| 11 Spectrometer Frequency | 500.35              |
| 12 Spectral Width         | 10000.0             |
| 13 Lowest Frequency       | -1923.3             |
| 14 Nucleus                | 1H                  |
| 15 Acquired Size          | 32768               |
| 16 Spectral Size          | 65536               |

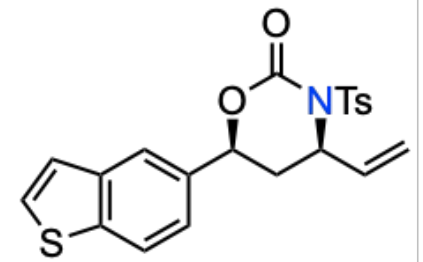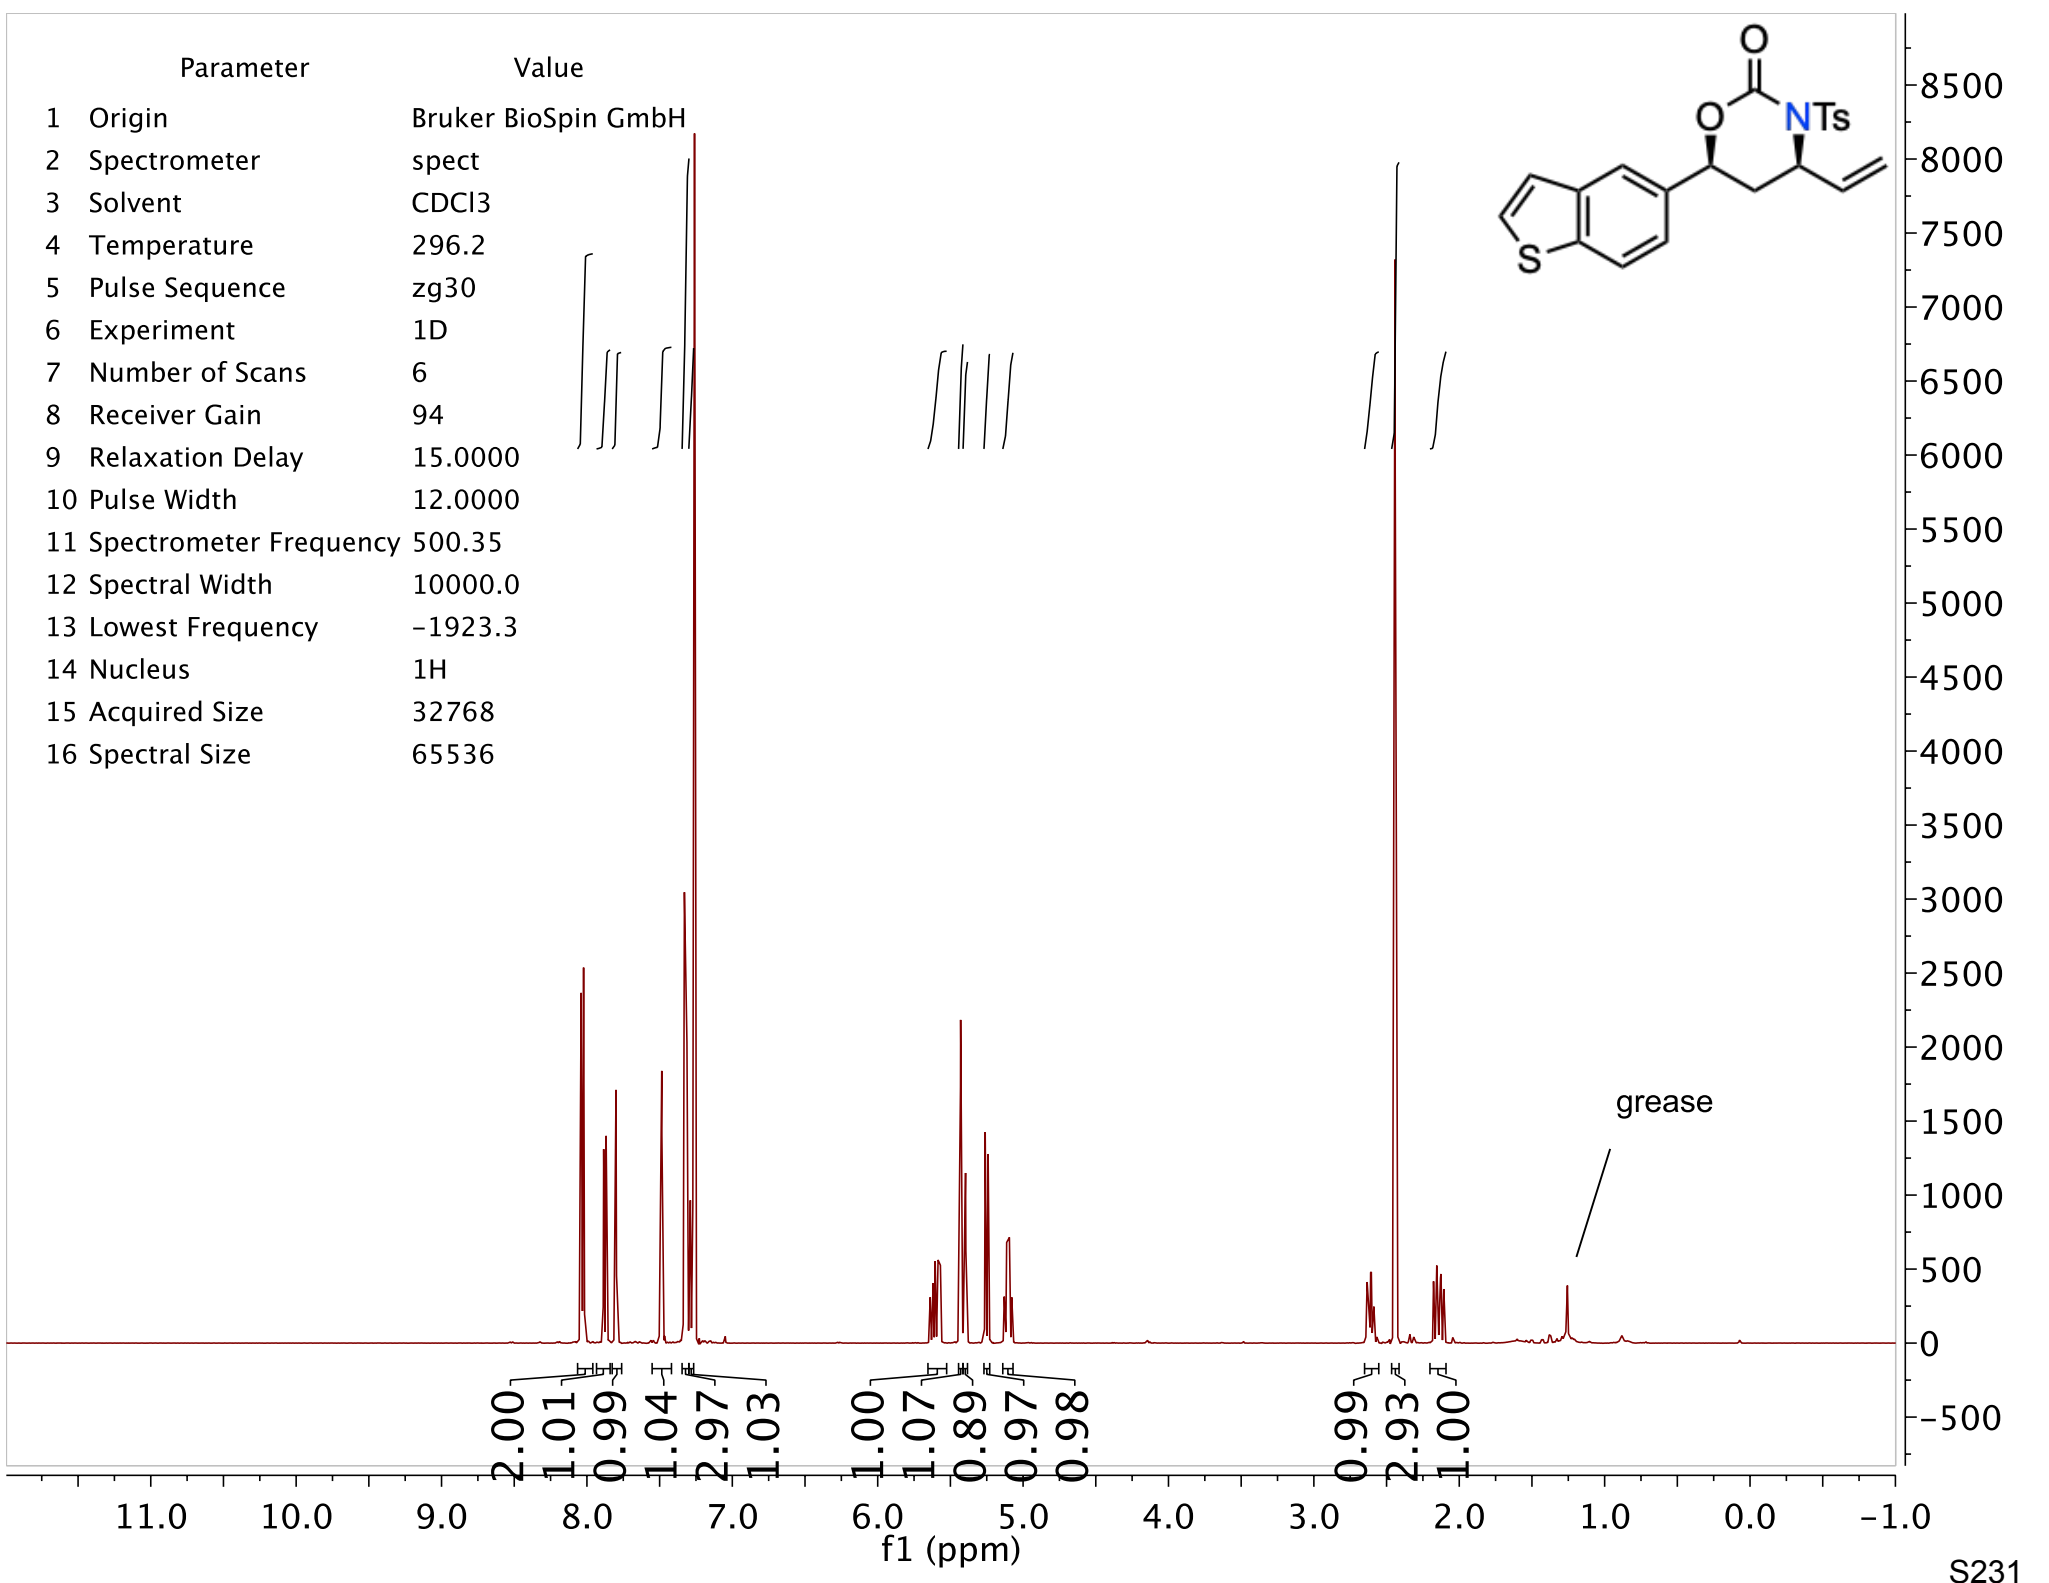

grease

| Parameter                 | Value               |
|---------------------------|---------------------|
| 1 Origin                  | Bruker BioSpin GmbH |
| 2 Spectrometer            | spect               |
| 3 Solvent                 | CDCl3               |
| 4 Temperature             | 296.2               |
| 5 Pulse Sequence          | zgpg30              |
| 6 Experiment              | 1D                  |
| 7 Number of Scans         | 1000                |
| 8 Receiver Gain           | 191                 |
| 9 Relaxation Delay        | 1.0000              |
| 10 Pulse Width            | 10.0000             |
| 11 Spectrometer Frequency | 125.83              |
| 12 Spectral Width         | 31512.6             |
| 13 Lowest Frequency       | -1900.8             |
| 14 Nucleus                | <sup>13</sup> C     |
| 15 Acquired Size          | 32768               |
| 16 Spectral Size          | 65536               |

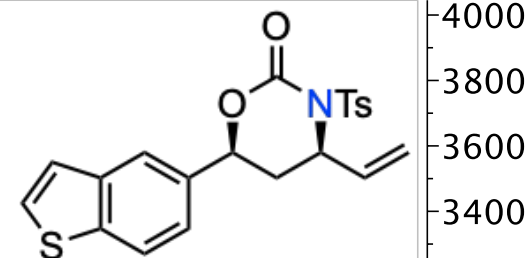

190 180 170 160 150 140 130 120 110 100 90 80 70 60 50 40 30 20 10 0 -10  
f1 (ppm)

| Parameter                 | Value               |
|---------------------------|---------------------|
| 1 Origin                  | Bruker BioSpin GmbH |
| 2 Spectrometer            | spect               |
| 3 Solvent                 | CDCl3               |
| 4 Temperature             | 296.1               |
| 5 Pulse Sequence          | zg30                |
| 6 Experiment              | 1D                  |
| 7 Number of Scans         | 6                   |
| 8 Receiver Gain           | 86                  |
| 9 Relaxation Delay        | 15.0000             |
| 10 Pulse Width            | 12.0000             |
| 11 Spectrometer Frequency | 500.35              |
| 12 Spectral Width         | 10000.0             |
| 13 Lowest Frequency       | -1923.2             |
| 14 Nucleus                | 1H                  |
| 15 Acquired Size          | 32768               |
| 16 Spectral Size          | 65536               |

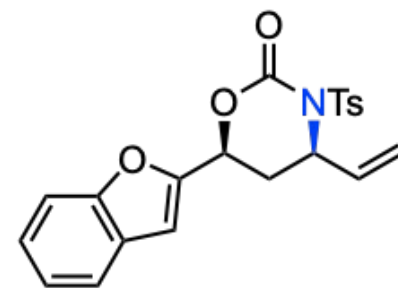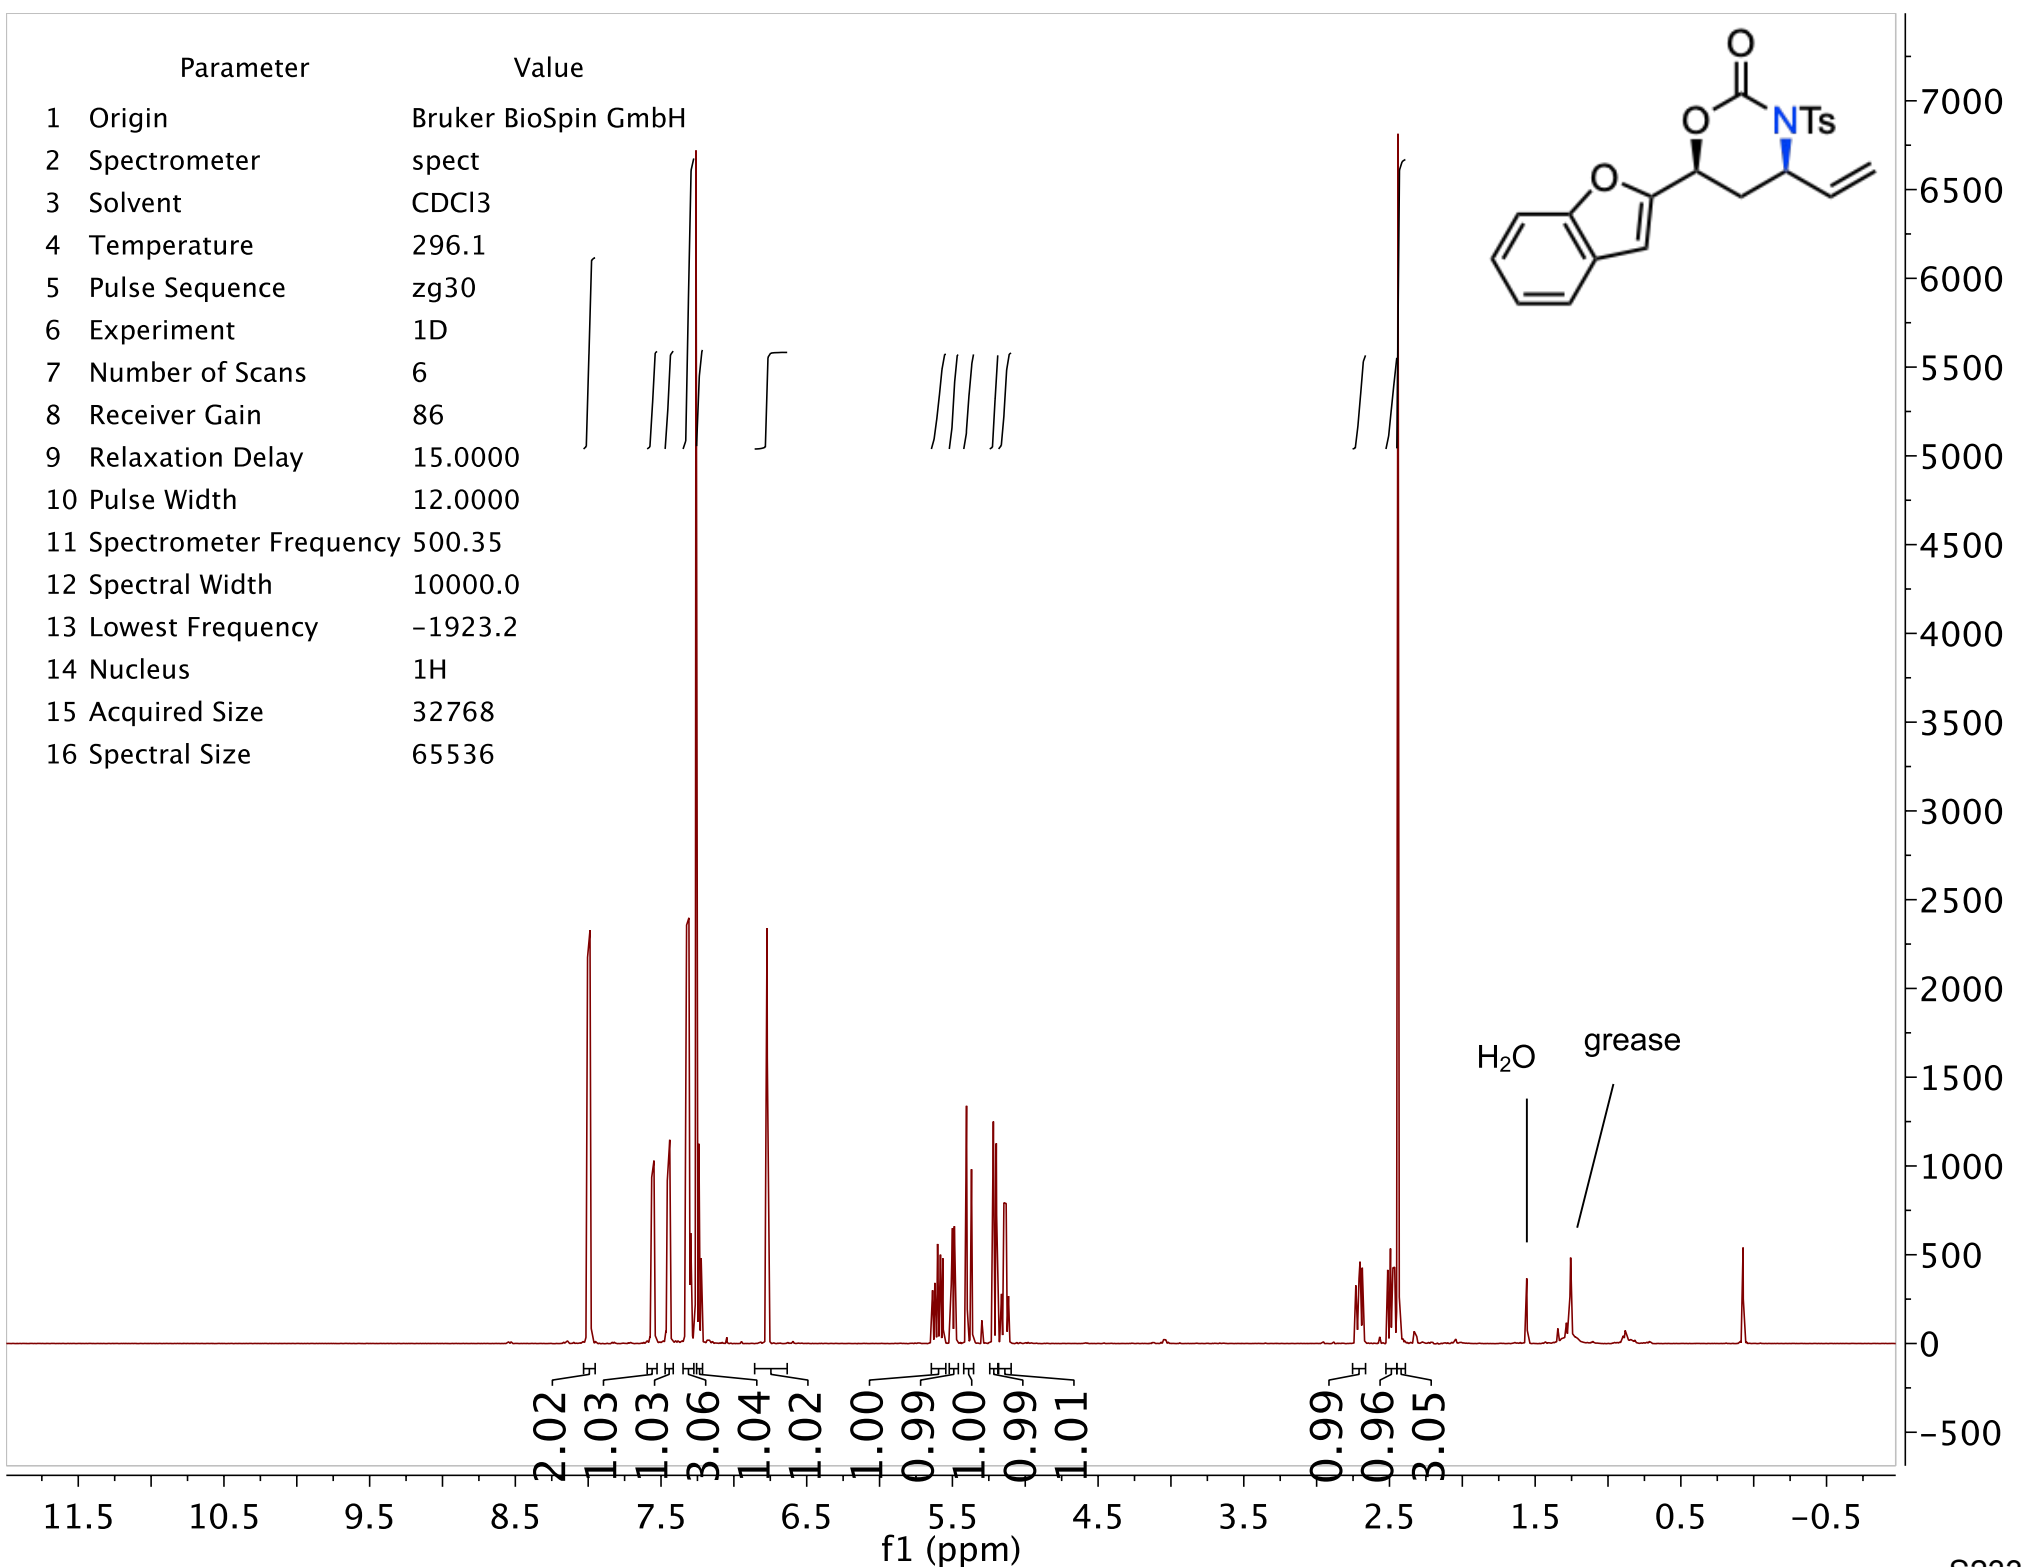

| Parameter                 | Value               |
|---------------------------|---------------------|
| 1 Origin                  | Bruker BioSpin GmbH |
| 2 Spectrometer            | spect               |
| 3 Solvent                 | CDCl3               |
| 4 Temperature             | 296.2               |
| 5 Pulse Sequence          | zgpg30              |
| 6 Experiment              | 1D                  |
| 7 Number of Scans         | 1000                |
| 8 Receiver Gain           | 191                 |
| 9 Relaxation Delay        | 1.0000              |
| 10 Pulse Width            | 10.0000             |
| 11 Spectrometer Frequency | 125.83              |
| 12 Spectral Width         | 31512.6             |
| 13 Lowest Frequency       | -1900.1             |
| 14 Nucleus                | 13C                 |
| 15 Acquired Size          | 32768               |
| 16 Spectral Size          | 65536               |

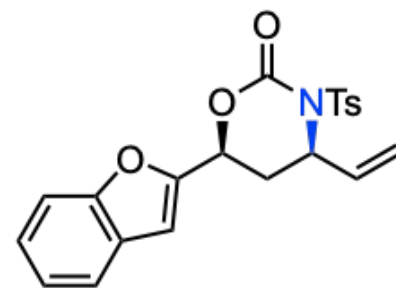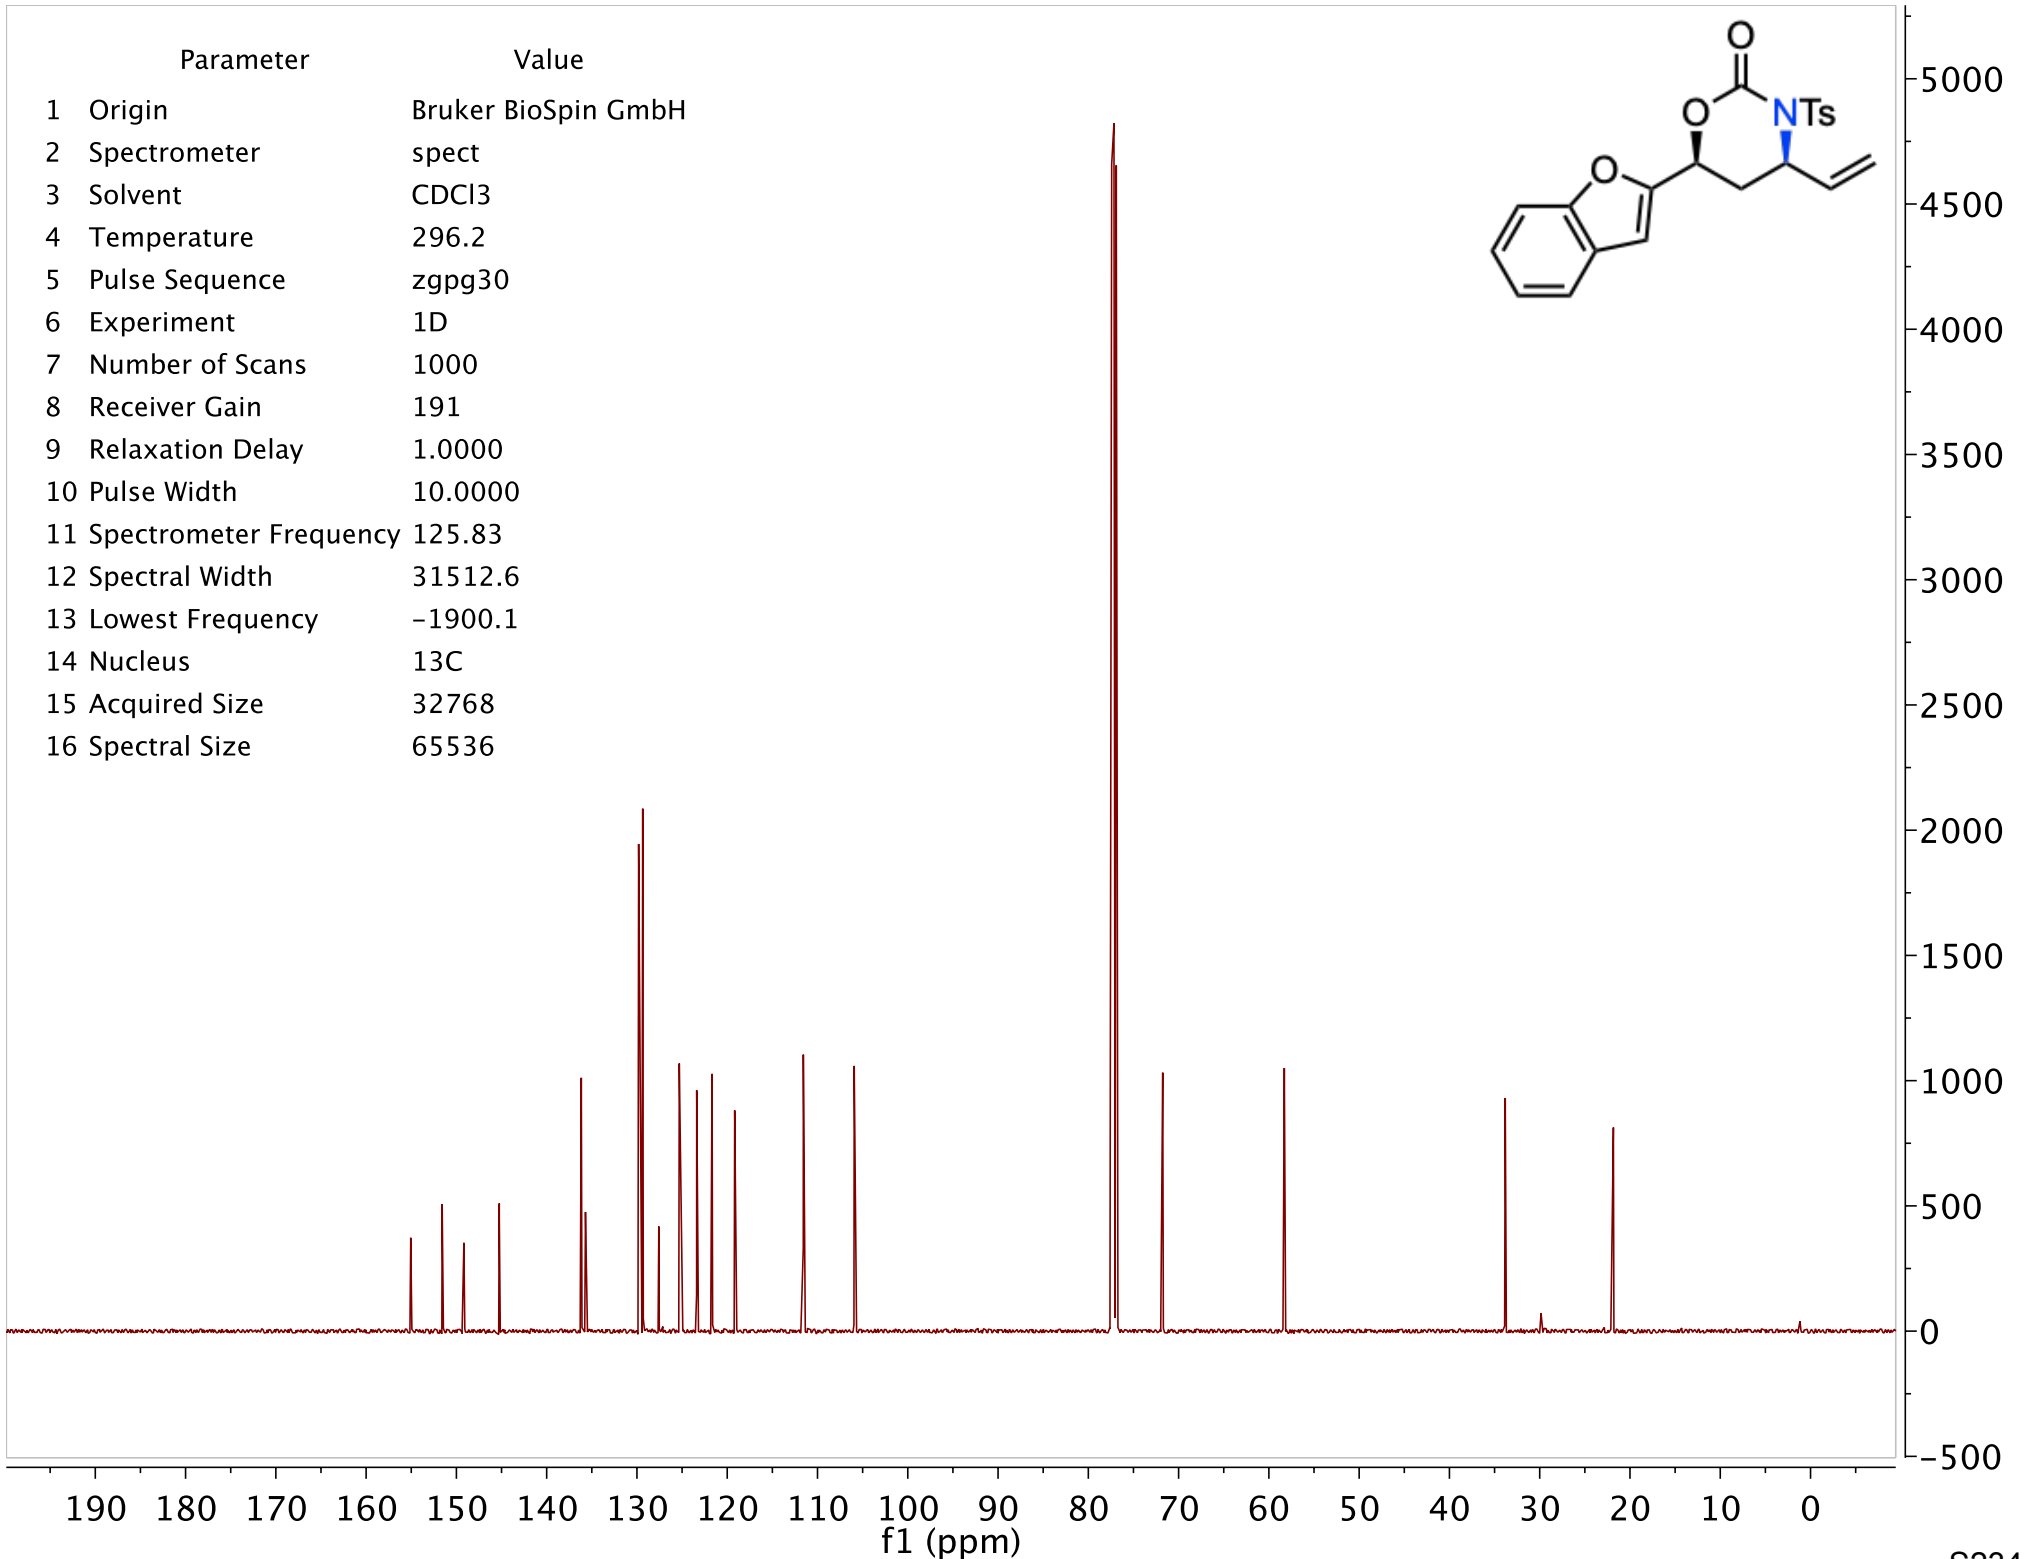

| Parameter                 | Value               |
|---------------------------|---------------------|
| 1 Origin                  | Bruker BioSpin GmbH |
| 2 Instrument              | spect               |
| 3 Solvent                 | CDCl3               |
| 4 Temperature             | 298.1               |
| 5 Pulse Sequence          | zg30                |
| 6 Experiment              | 1D                  |
| 7 Number of Scans         | 8                   |
| 8 Receiver Gain           | 61.8                |
| 9 Relaxation Delay        | 15.0000             |
| 10 Pulse Width            | 12.0000             |
| 11 Spectrometer Frequency | 500.35              |
| 12 Spectral Width         | 10000.0             |
| 13 Lowest Frequency       | -1922.3             |
| 14 Nucleus                | 1H                  |
| 15 Acquired Size          | 32768               |
| 16 Spectral Size          | 65536               |

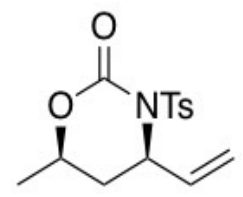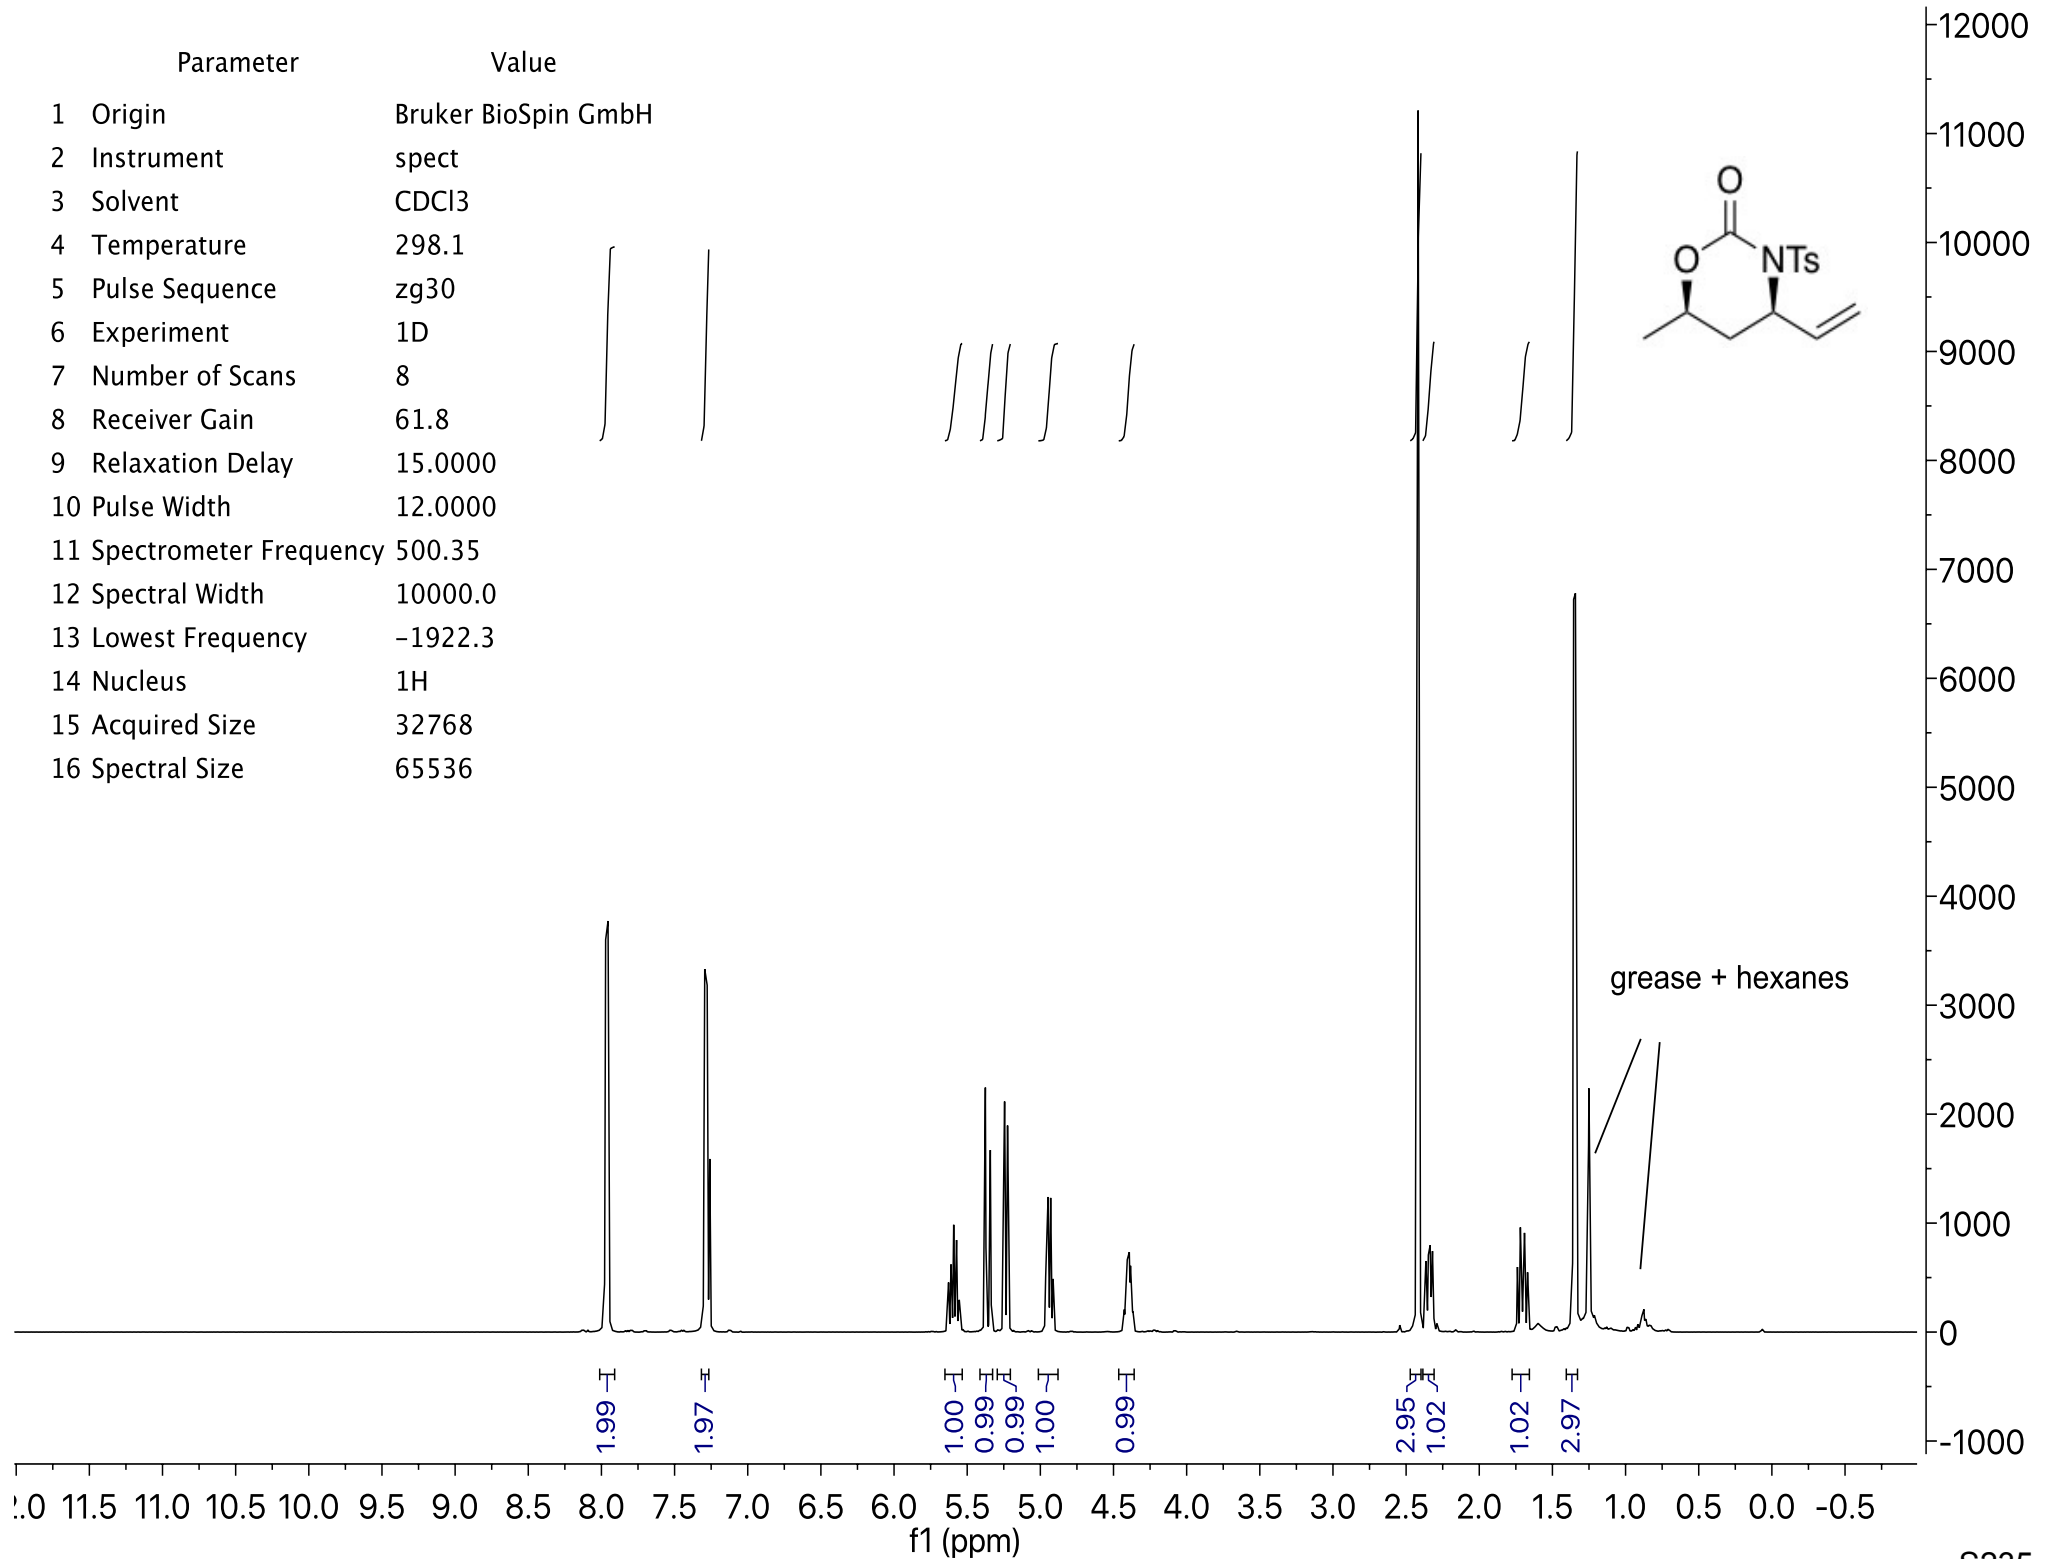

| Parameter                 | Value               |
|---------------------------|---------------------|
| 1 Origin                  | Bruker BioSpin GmbH |
| 2 Instrument              | spect               |
| 3 Solvent                 | CDCl3               |
| 4 Temperature             | 298.2               |
| 5 Pulse Sequence          | zgpg30              |
| 6 Experiment              | 1D                  |
| 7 Number of Scans         | 512                 |
| 8 Receiver Gain           | 190.5               |
| 9 Relaxation Delay        | 1.0000              |
| 10 Pulse Width            | 10.0000             |
| 11 Spectrometer Frequency | 125.83              |
| 12 Spectral Width         | 31512.6             |
| 13 Lowest Frequency       | -1901.1             |
| 14 Nucleus                | 13C                 |
| 15 Acquired Size          | 32768               |
| 16 Spectral Size          | 65536               |

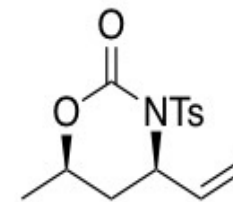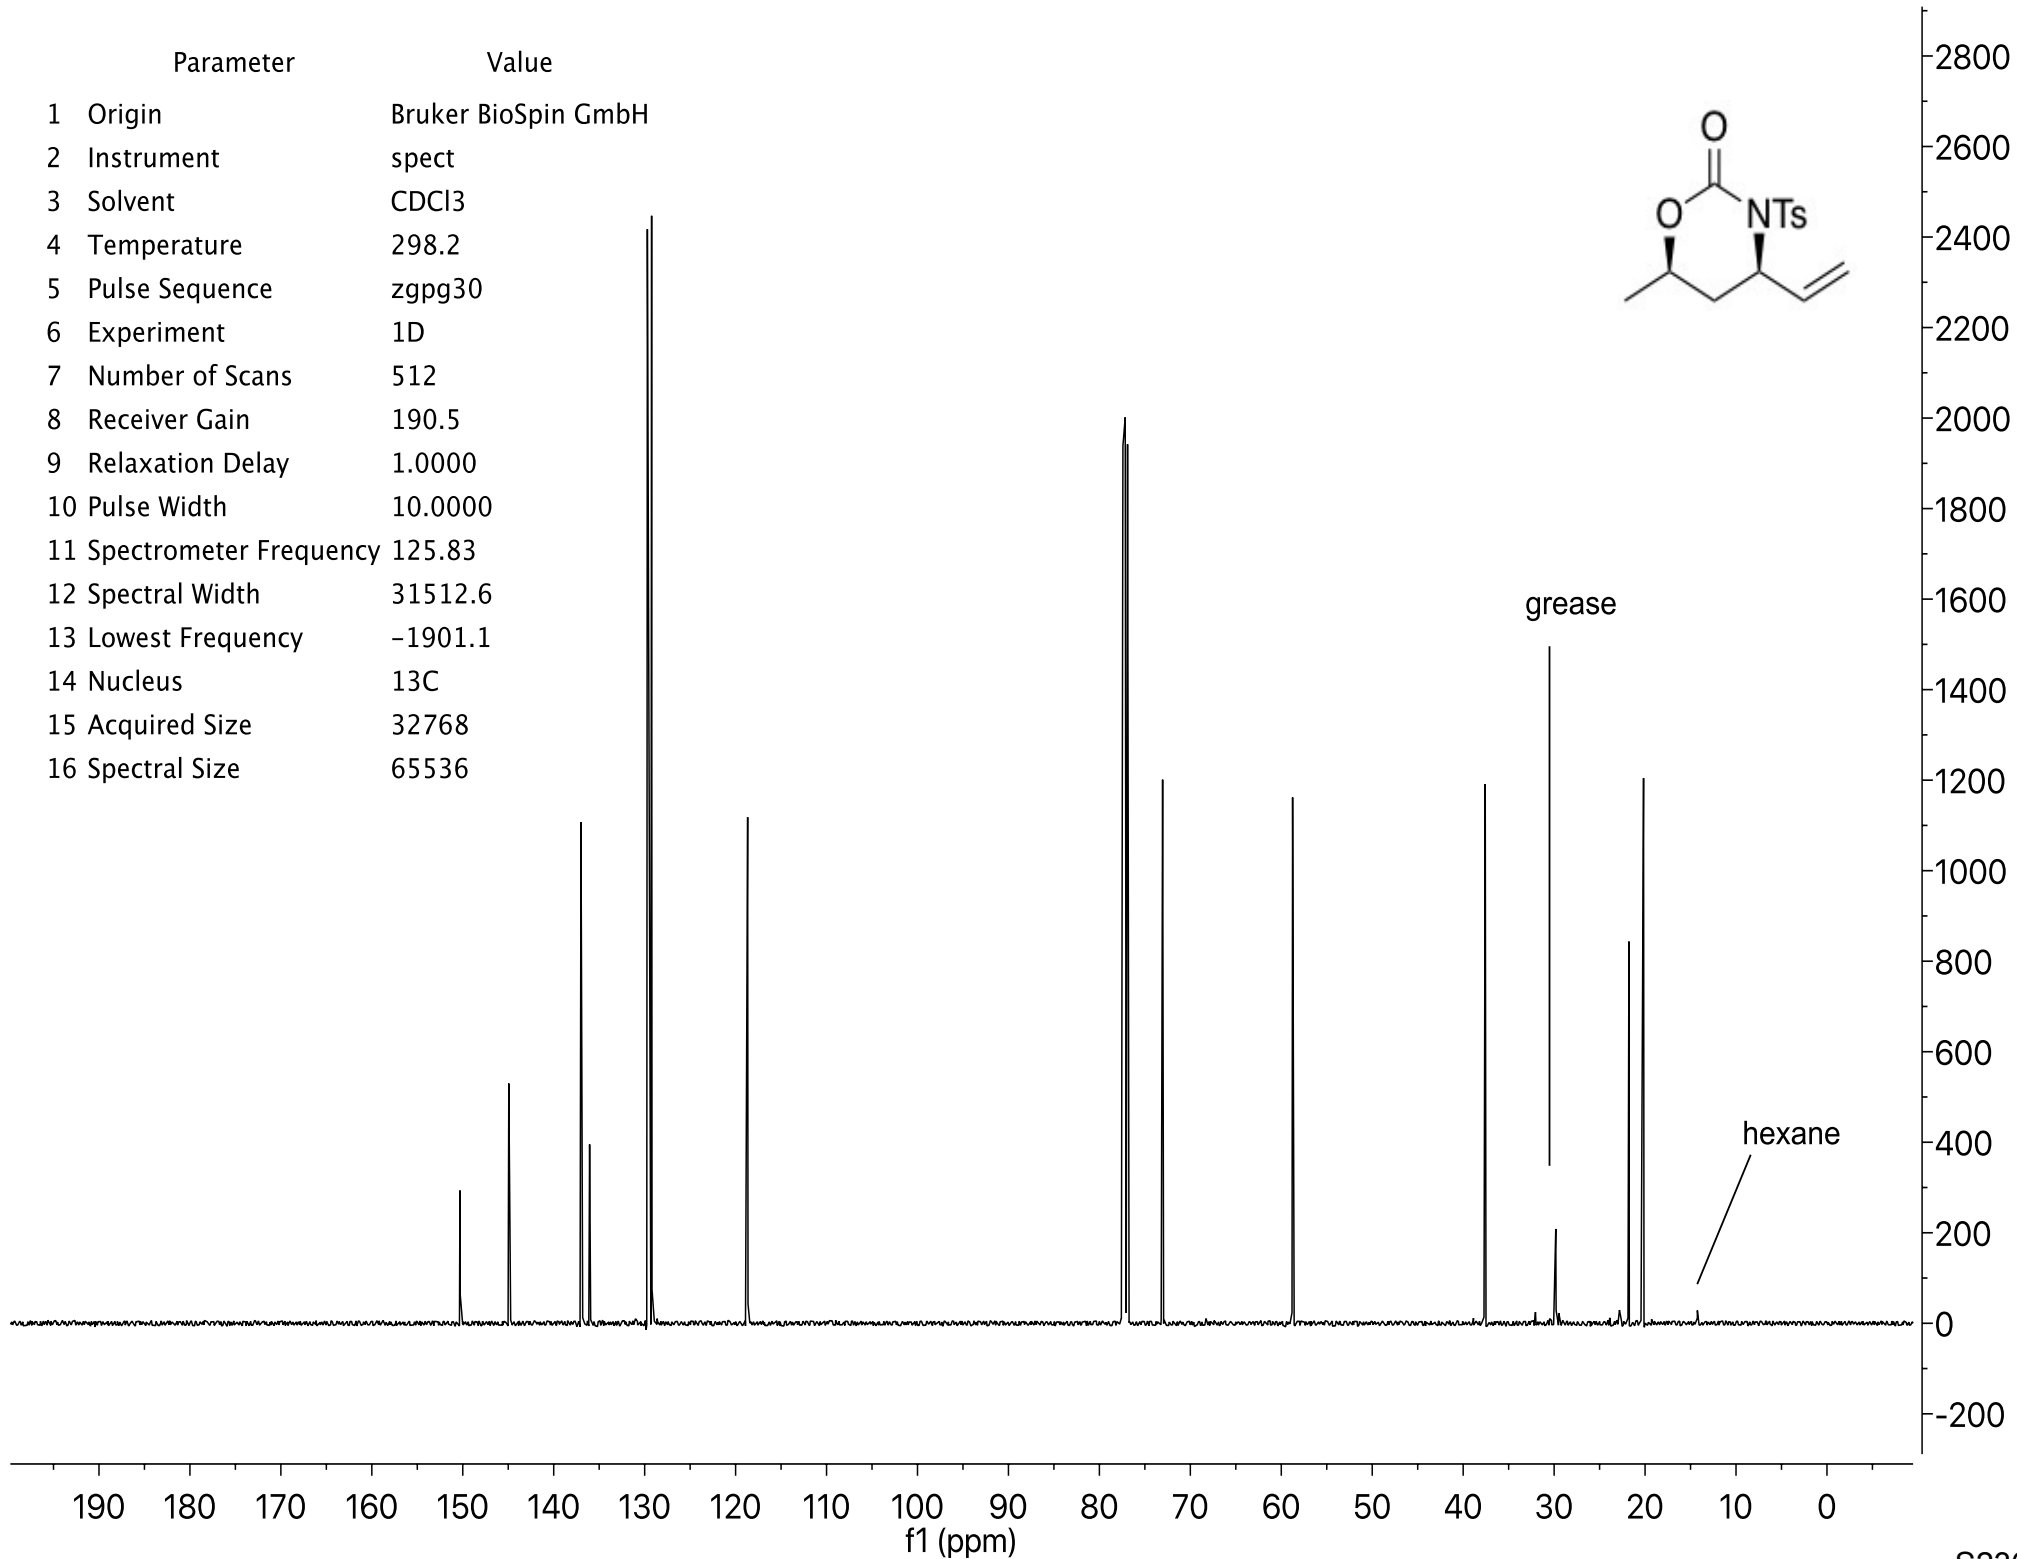

| Parameter                 | Value               |
|---------------------------|---------------------|
| 1 Origin                  | Bruker BioSpin GmbH |
| 2 Instrument              | spect               |
| 3 Solvent                 | CDCl3               |
| 4 Temperature             | 298.1               |
| 5 Pulse Sequence          | zg30                |
| 6 Experiment              | 1D                  |
| 7 Number of Scans         | 5                   |
| 8 Receiver Gain           | 29.7                |
| 9 Relaxation Delay        | 15.0000             |
| 10 Pulse Width            | 12.0000             |
| 11 Spectrometer Frequency | 500.35              |
| 12 Spectral Width         | 10000.0             |
| 13 Lowest Frequency       | -1906.3             |
| 14 Nucleus                | 1H                  |
| 15 Acquired Size          | 32768               |
| 16 Spectral Size          | 65536               |

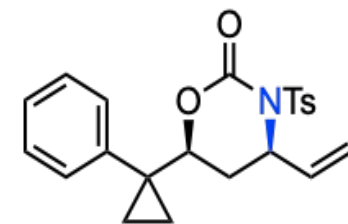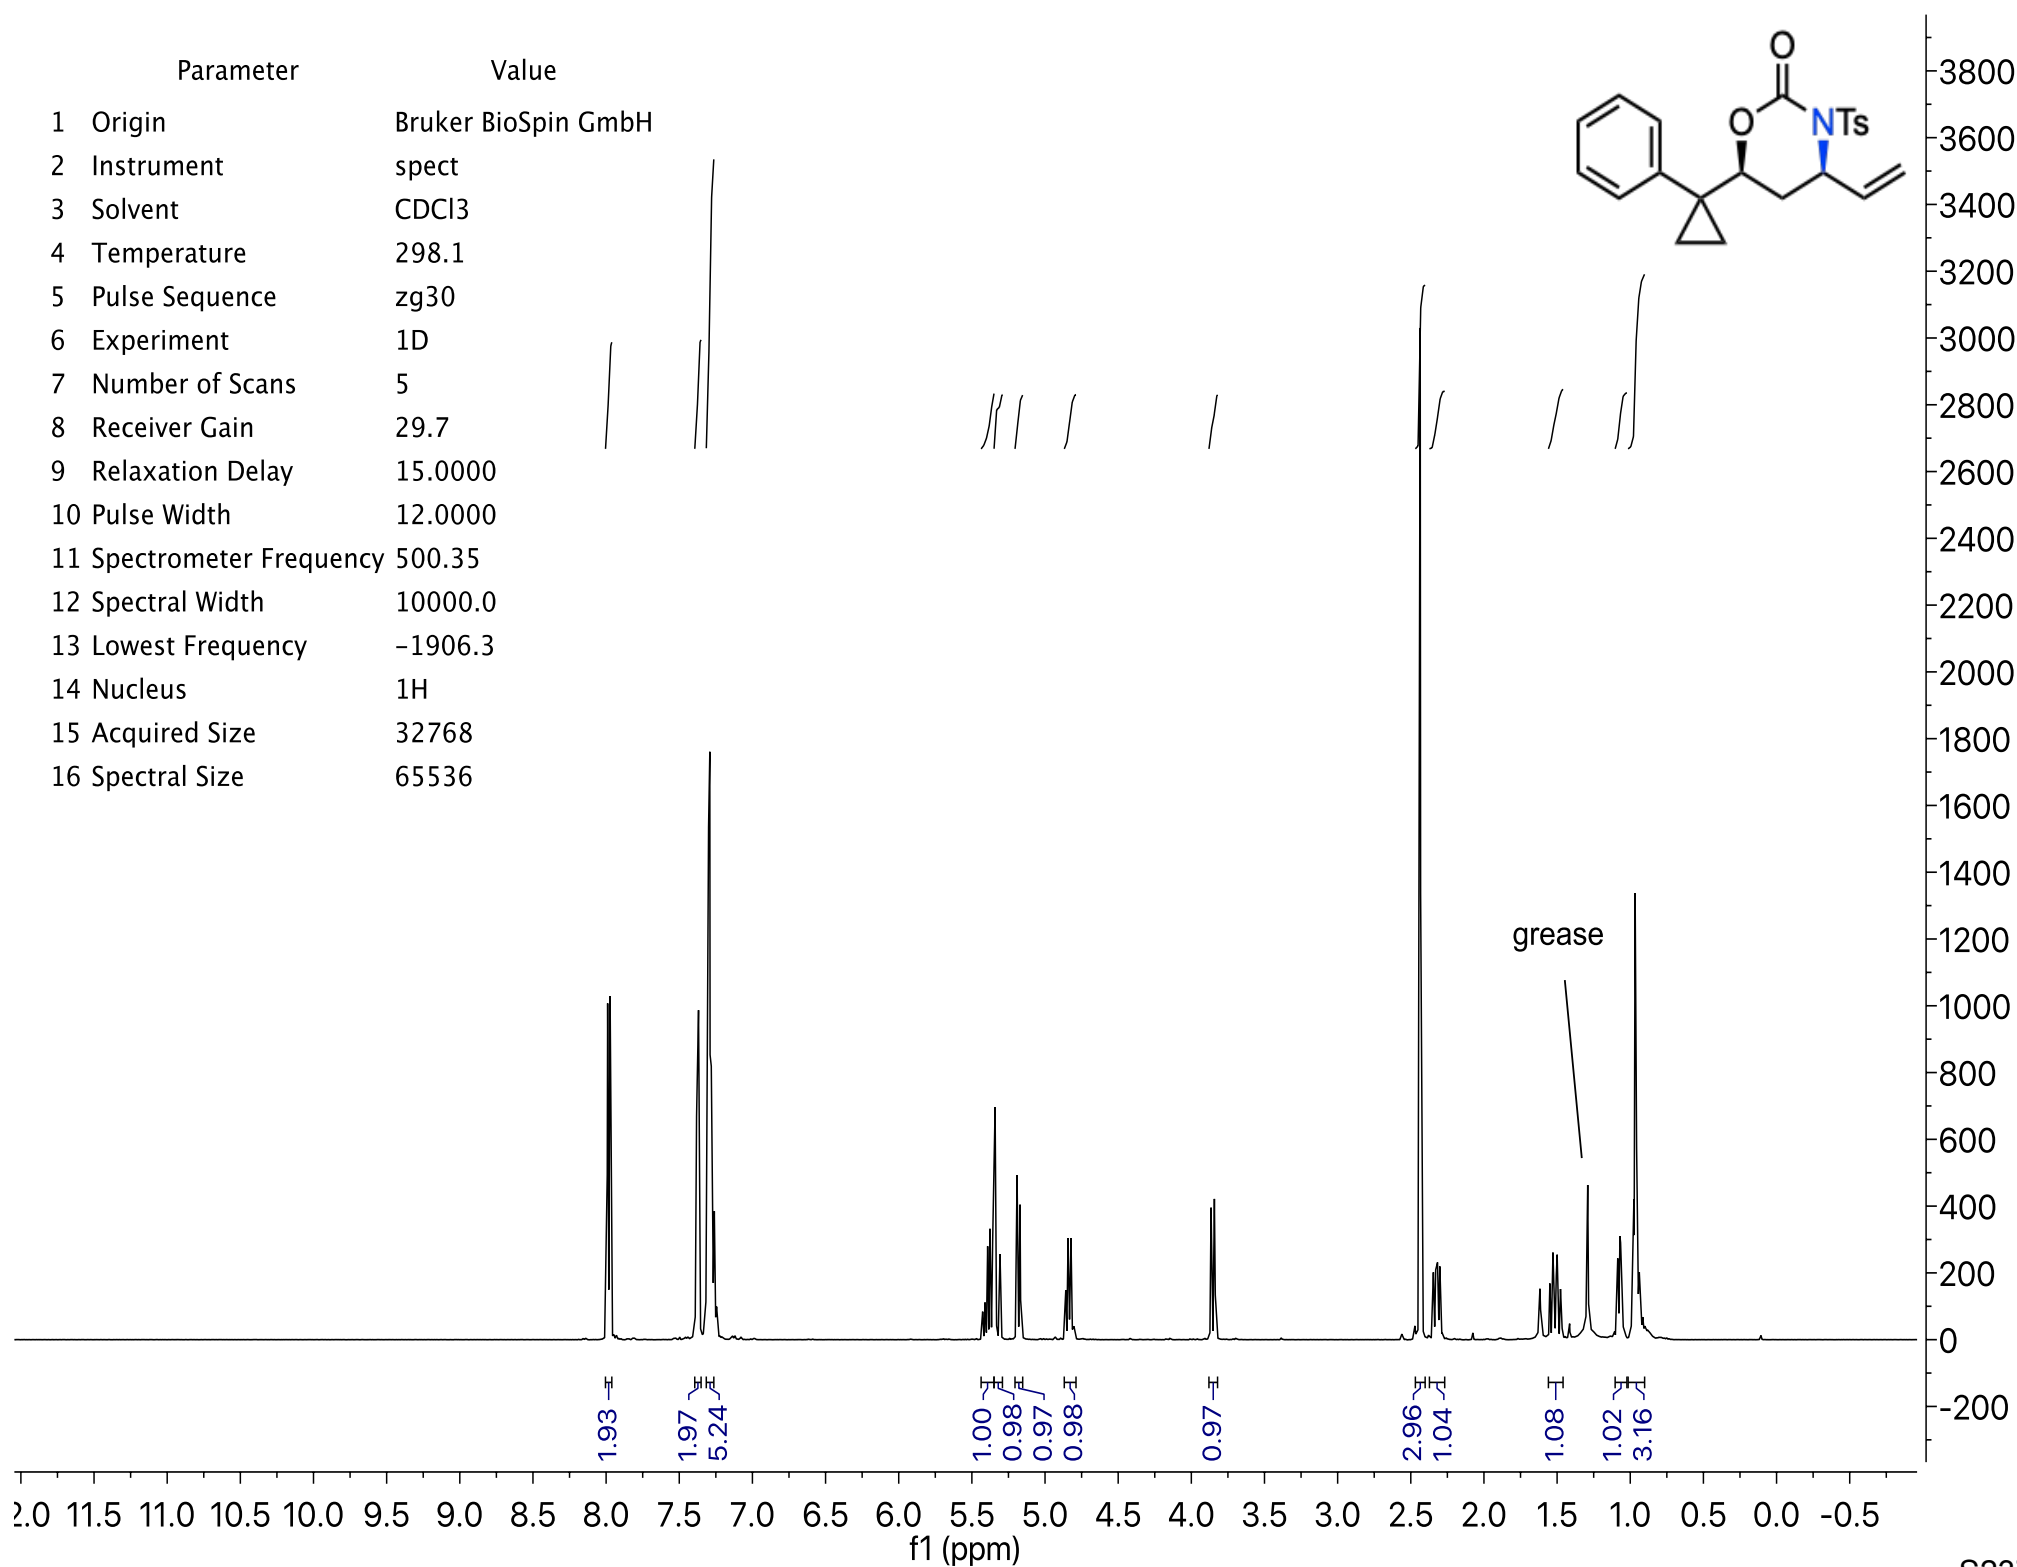

| Parameter                 | Value               |
|---------------------------|---------------------|
| 1 Origin                  | Bruker BioSpin GmbH |
| 2 Instrument              | spect               |
| 3 Solvent                 | CDCl3               |
| 4 Temperature             | 298.2               |
| 5 Pulse Sequence          | zgpg30              |
| 6 Experiment              | 1D                  |
| 7 Number of Scans         | 512                 |
| 8 Receiver Gain           | 190.5               |
| 9 Relaxation Delay        | 1.0000              |
| 10 Pulse Width            | 10.0000             |
| 11 Spectrometer Frequency | 125.83              |
| 12 Spectral Width         | 31512.6             |
| 13 Lowest Frequency       | -1901.4             |
| 14 Nucleus                | 13C                 |
| 15 Acquired Size          | 32768               |
| 16 Spectral Size          | 65536               |

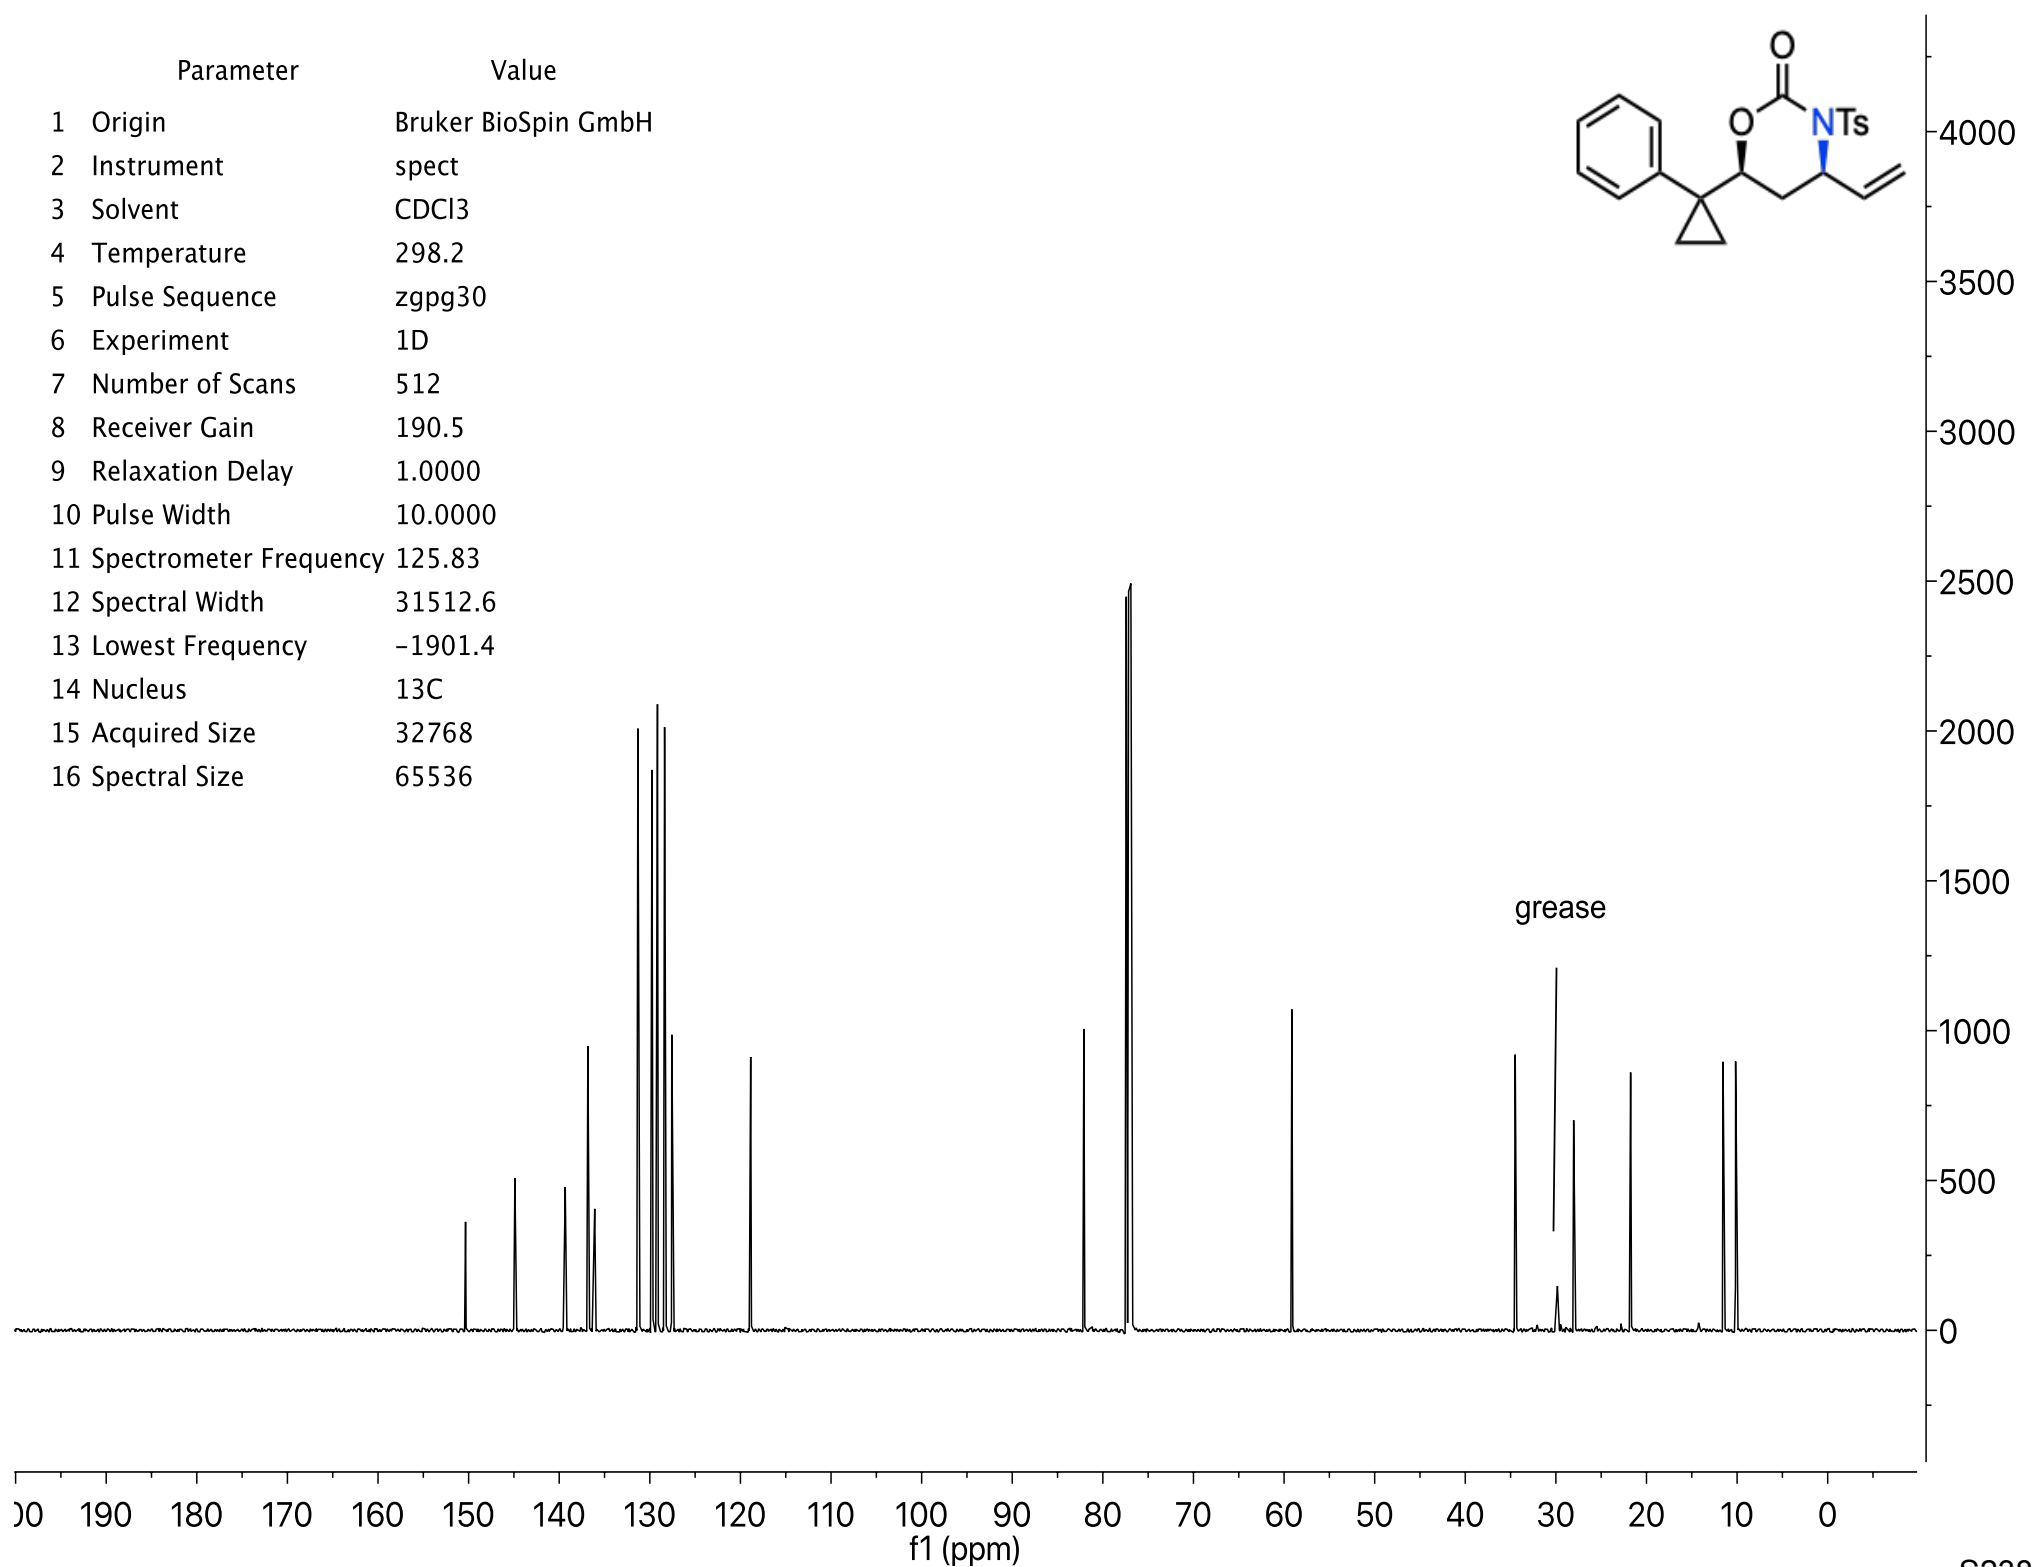



| Parameter                 | Value               |
|---------------------------|---------------------|
| 1 Origin                  | Bruker BioSpin GmbH |
| 2 Spectrometer            | spect               |
| 3 Solvent                 | CDCl3               |
| 4 Temperature             | 296.2               |
| 5 Pulse Sequence          | zg30                |
| 6 Experiment              | 1D                  |
| 7 Number of Scans         | 6                   |
| 8 Receiver Gain           | 62                  |
| 9 Relaxation Delay        | 15.0000             |
| 10 Pulse Width            | 12.0000             |
| 11 Spectrometer Frequency | 500.35              |
| 12 Spectral Width         | 10000.0             |
| 13 Lowest Frequency       | -1922.9             |
| 14 Nucleus                | 1H                  |
| 15 Acquired Size          | 32768               |
| 16 Spectral Size          | 65536               |

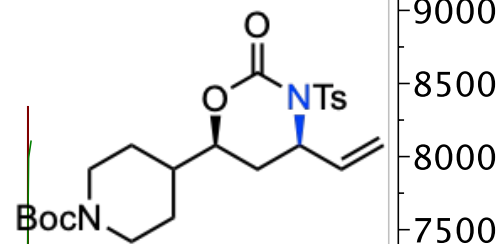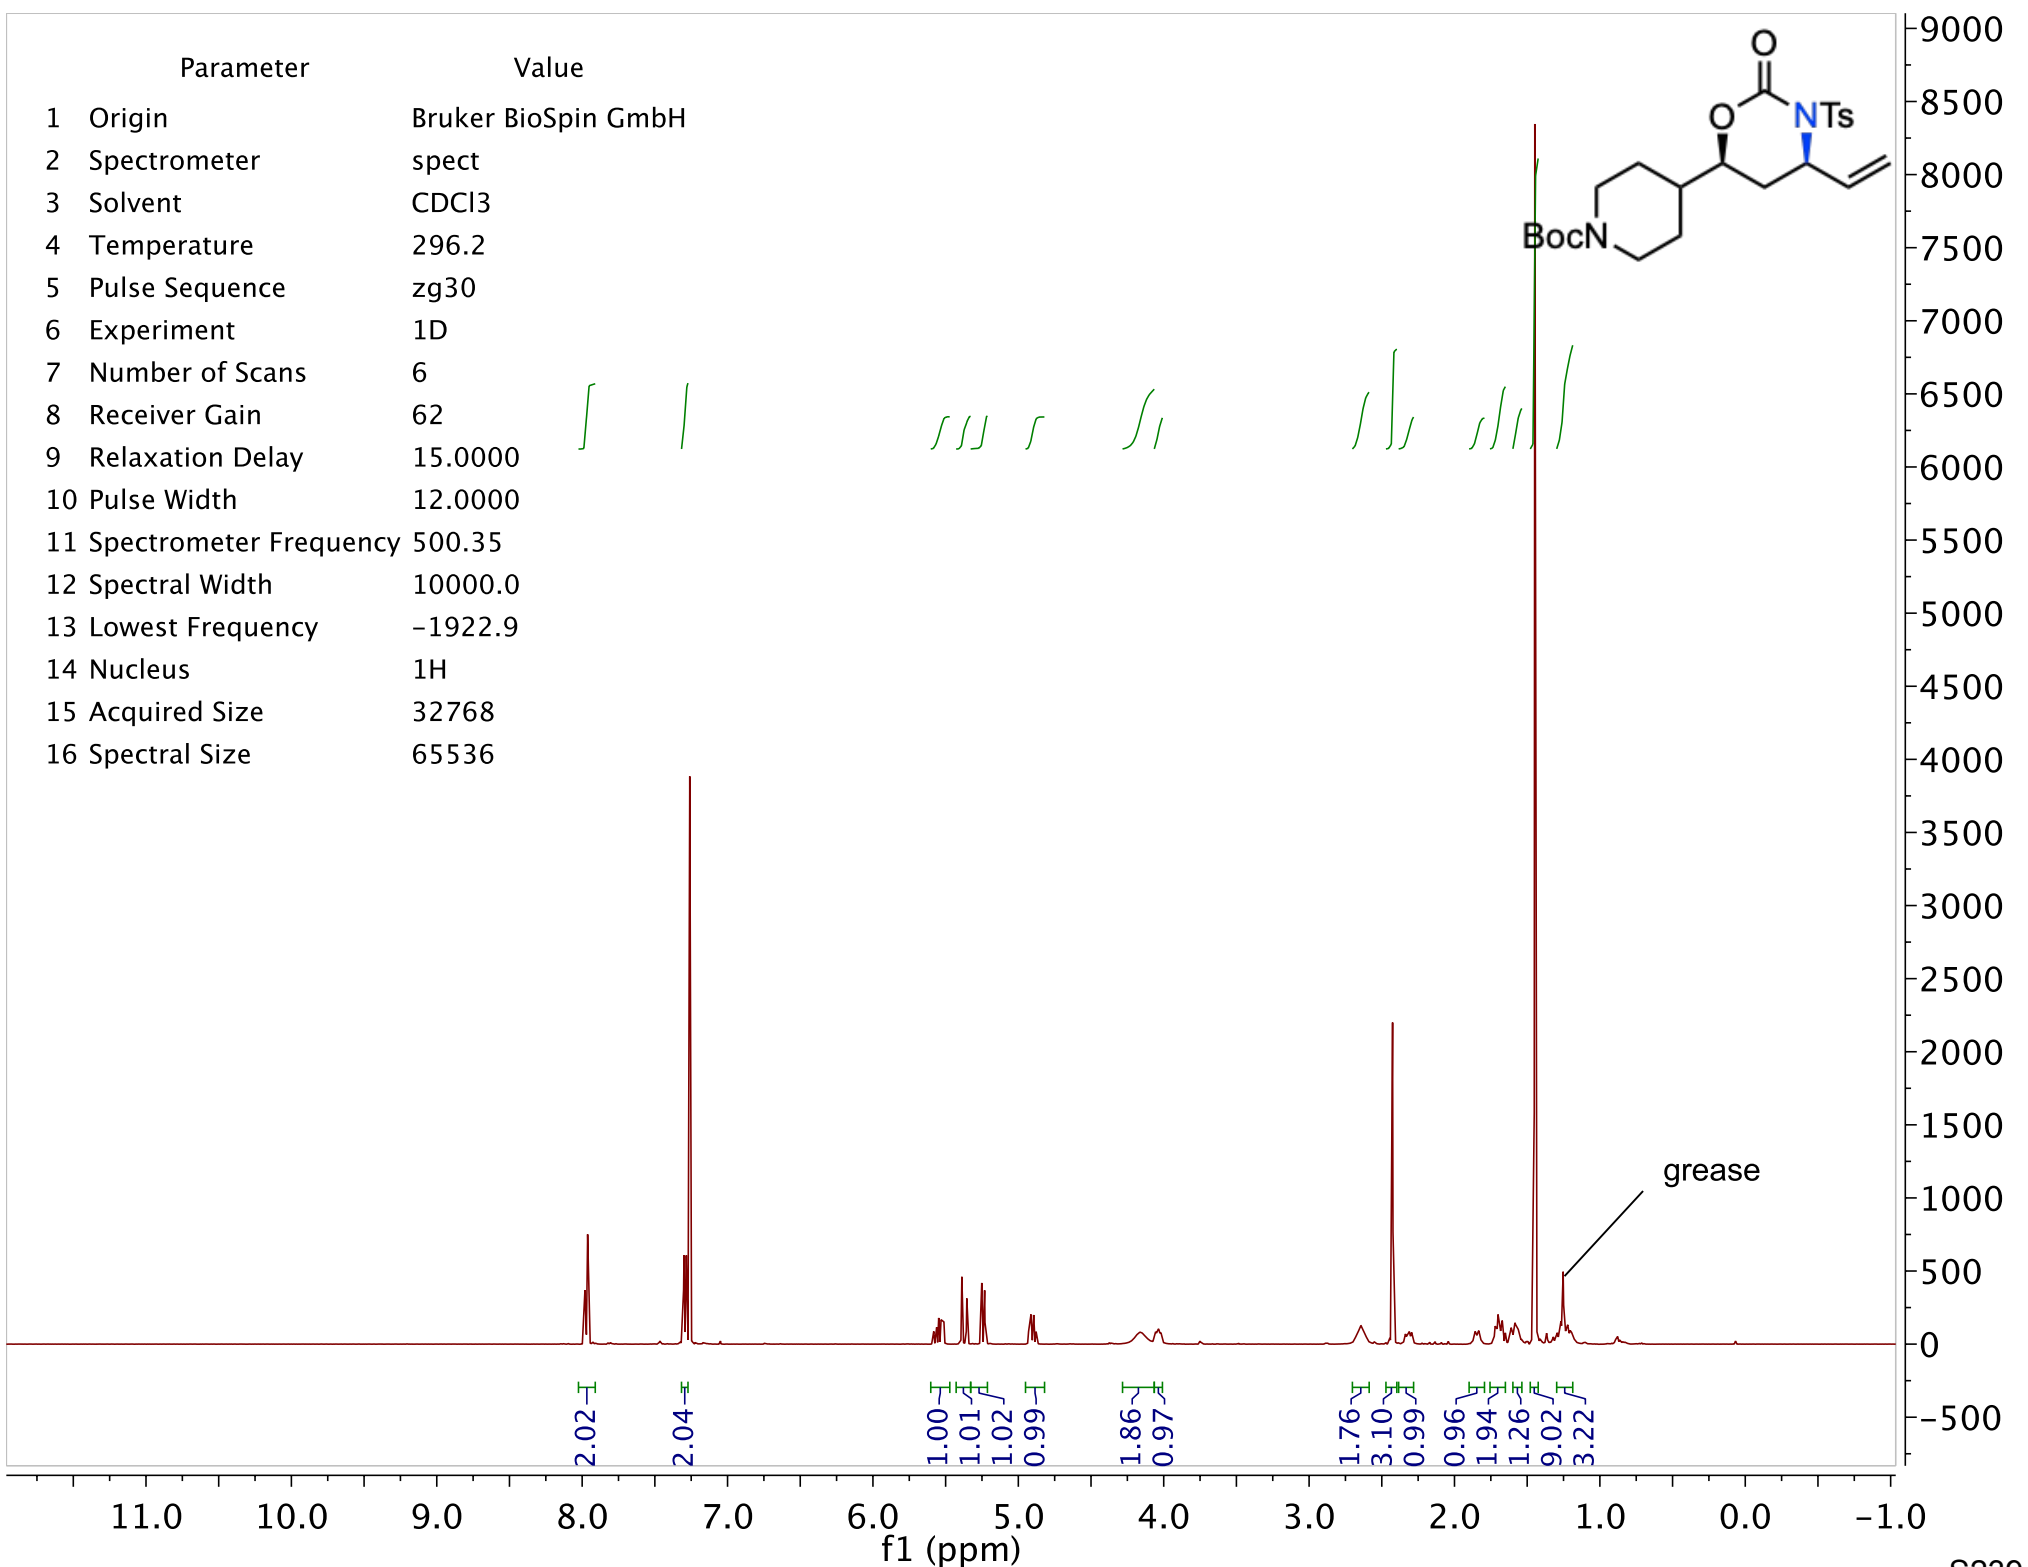

| Parameter                 | Value   |
|---------------------------|---------|
| 1 Origin                  | Varian  |
| 2 Spectrometer            | inova   |
| 3 Solvent                 | CDCl3   |
| 4 Temperature             | 30.0    |
| 5 Pulse Sequence          | s2pul   |
| 6 Experiment              | 1D      |
| 7 Number of Scans         | 22200   |
| 8 Receiver Gain           | 60      |
| 9 Relaxation Delay        | 1.0000  |
| 10 Pulse Width            | 6.0000  |
| 11 Spectrometer Frequency | 125.66  |
| 12 Spectral Width         | 30165.9 |
| 13 Lowest Frequency       | -1269.0 |
| 14 Nucleus                | 13C     |
| 15 Acquired Size          | 32768   |
| 16 Spectral Size          | 65536   |

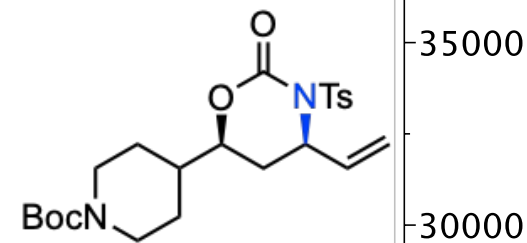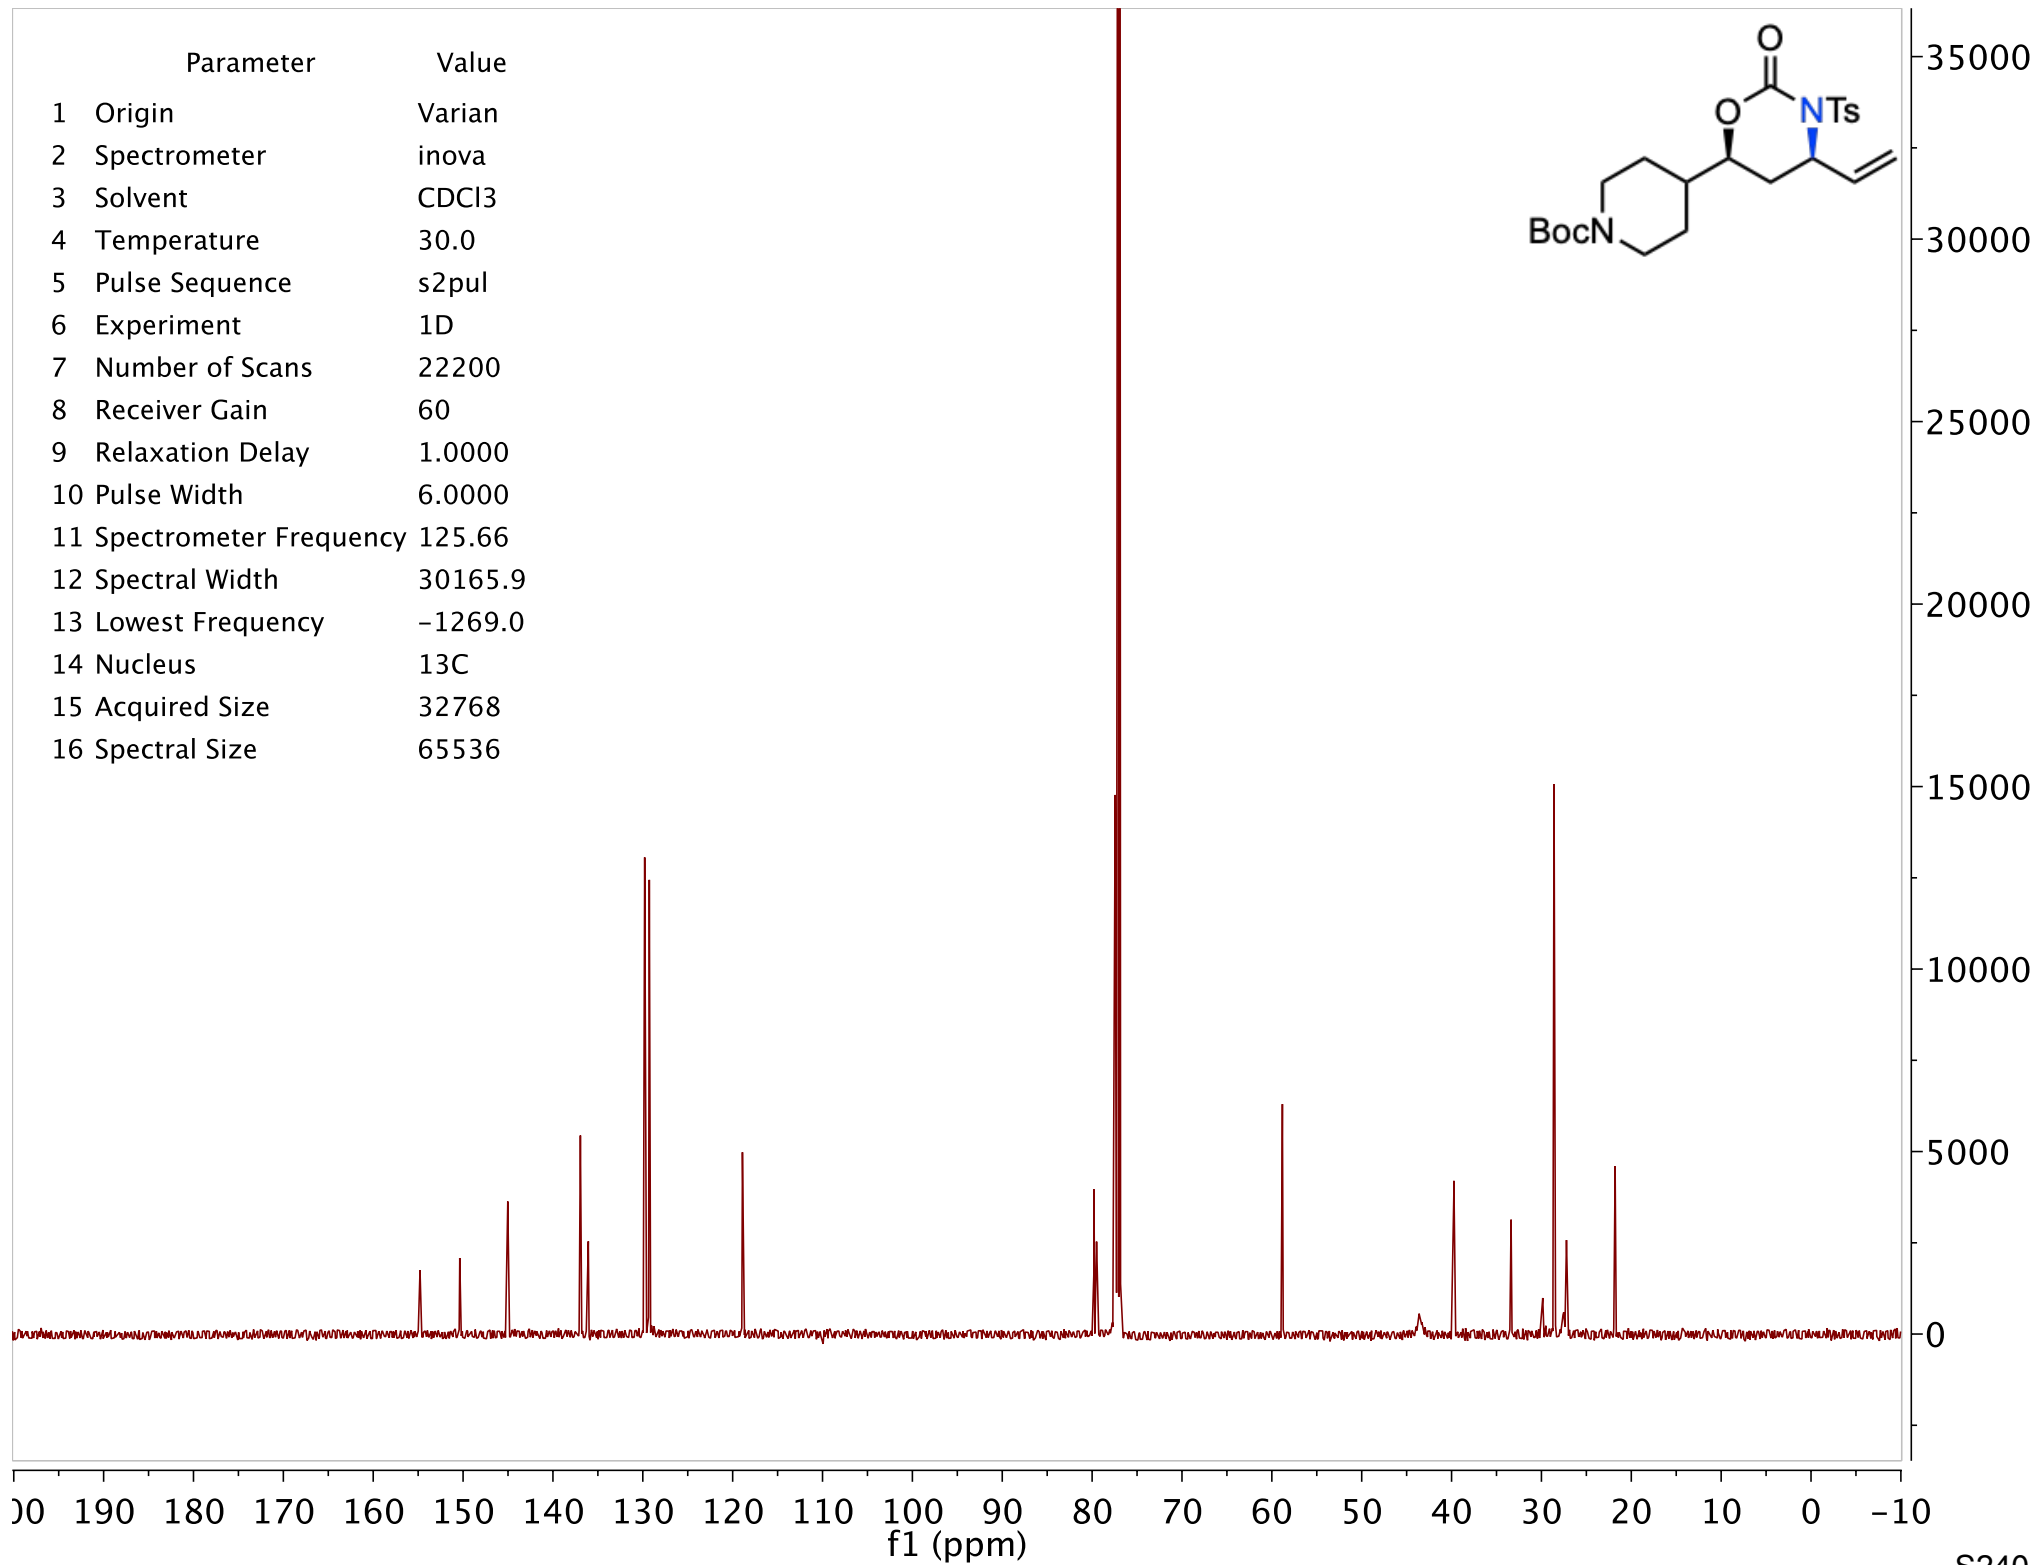

| Parameter                 | Value               |
|---------------------------|---------------------|
| 1 Origin                  | Bruker BioSpin GmbH |
| 2 Instrument              | spect               |
| 3 Solvent                 | CDCl3               |
| 4 Temperature             | 289.2               |
| 5 Pulse Sequence          | zg30                |
| 6 Experiment              | 1D                  |
| 7 Number of Scans         | 16                  |
| 8 Receiver Gain           | 29.7                |
| 9 Relaxation Delay        | 15.0000             |
| 10 Pulse Width            | 12.0000             |
| 11 Spectrometer Frequency | 500.35              |
| 12 Spectral Width         | 10000.0             |
| 13 Lowest Frequency       | -1921.6             |
| 14 Nucleus                | 1H                  |
| 15 Acquired Size          | 32768               |
| 16 Spectral Size          | 65536               |

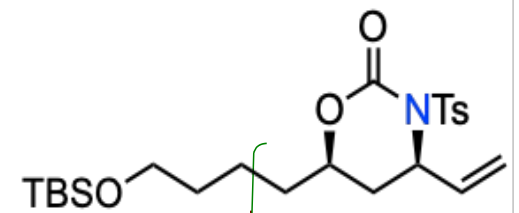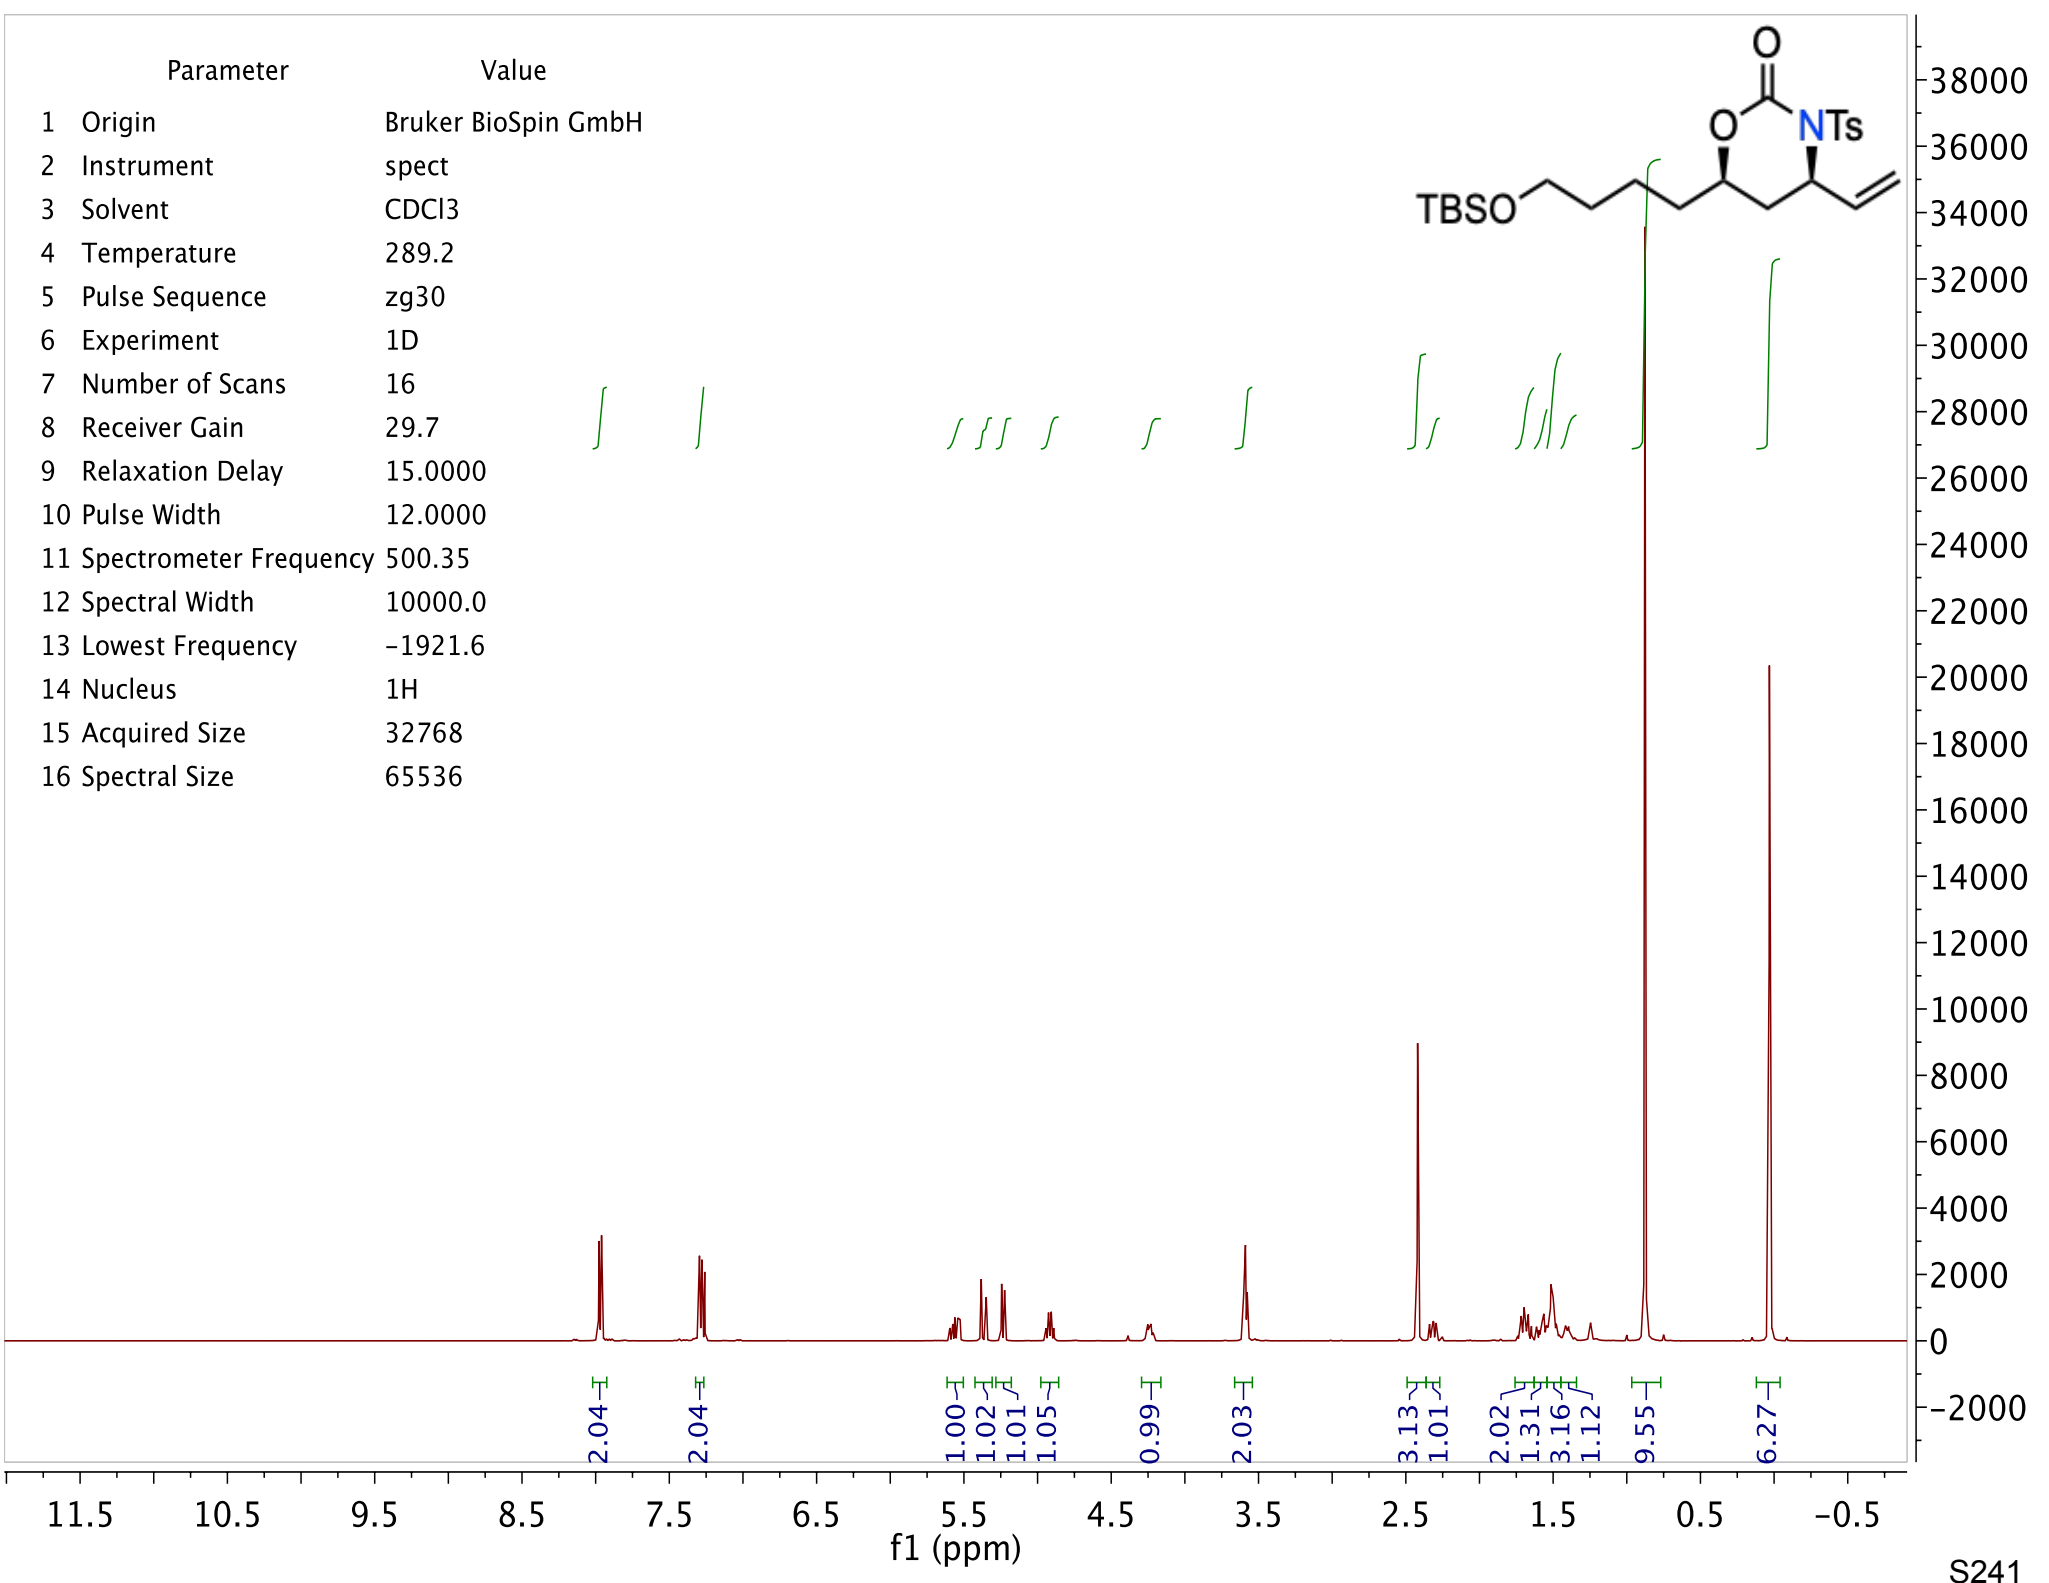

| Parameter                 | Value               |
|---------------------------|---------------------|
| 1 Origin                  | Bruker BioSpin GmbH |
| 2 Instrument              | spect               |
| 3 Solvent                 | CDCl3               |
| 4 Temperature             | 289.2               |
| 5 Pulse Sequence          | zgpg30              |
| 6 Experiment              | 1D                  |
| 7 Number of Scans         | 256                 |
| 8 Receiver Gain           | 190.5               |
| 9 Relaxation Delay        | 2.0000              |
| 10 Pulse Width            | 10.0000             |
| 11 Spectrometer Frequency | 125.83              |
| 12 Spectral Width         | 31512.6             |
| 13 Lowest Frequency       | -1903.8             |
| 14 Nucleus                | 13C                 |
| 15 Acquired Size          | 32768               |
| 16 Spectral Size          | 65536               |

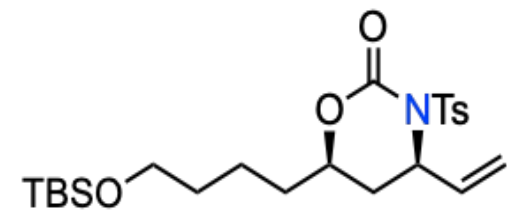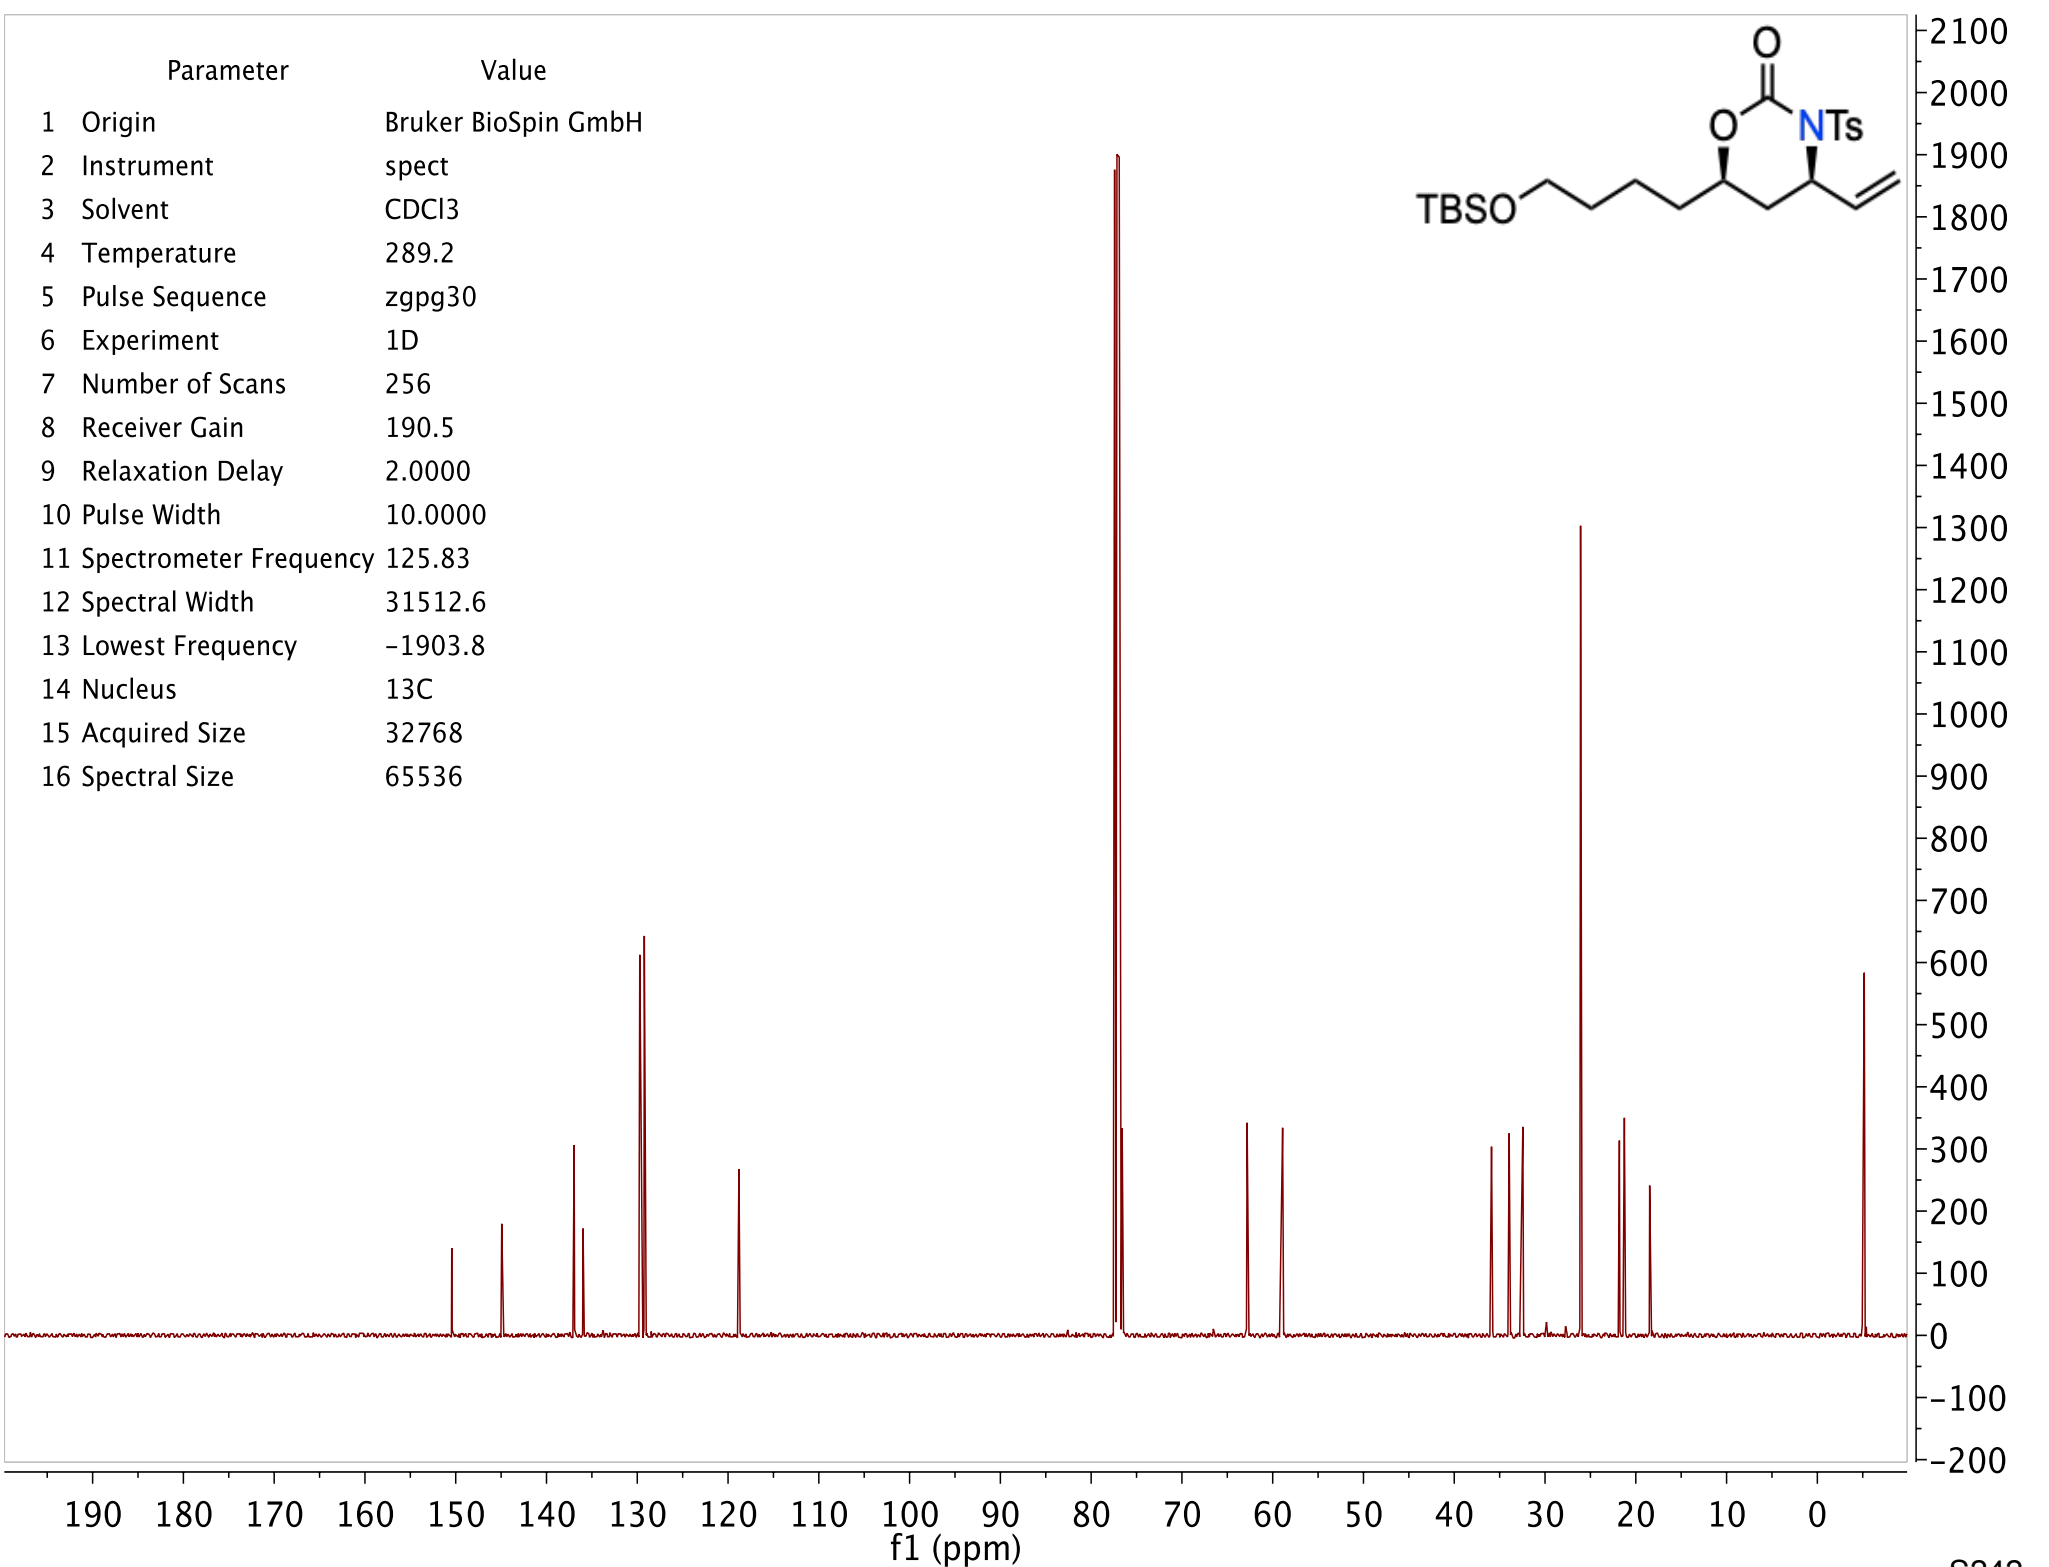

| Parameter                 | Value               |
|---------------------------|---------------------|
| 1 Origin                  | Bruker BioSpin GmbH |
| 2 Instrument              | spect               |
| 3 Solvent                 | CDCl3               |
| 4 Temperature             | 298.1               |
| 5 Pulse Sequence          | zg30                |
| 6 Experiment              | 1D                  |
| 7 Number of Scans         | 5                   |
| 8 Receiver Gain           | 76.2                |
| 9 Relaxation Delay        | 15.0000             |
| 10 Pulse Width            | 12.0000             |
| 11 Spectrometer Frequency | 500.35              |
| 12 Spectral Width         | 10000.0             |
| 13 Lowest Frequency       | -1922.4             |
| 14 Nucleus                | 1H                  |
| 15 Acquired Size          | 32768               |
| 16 Spectral Size          | 65536               |

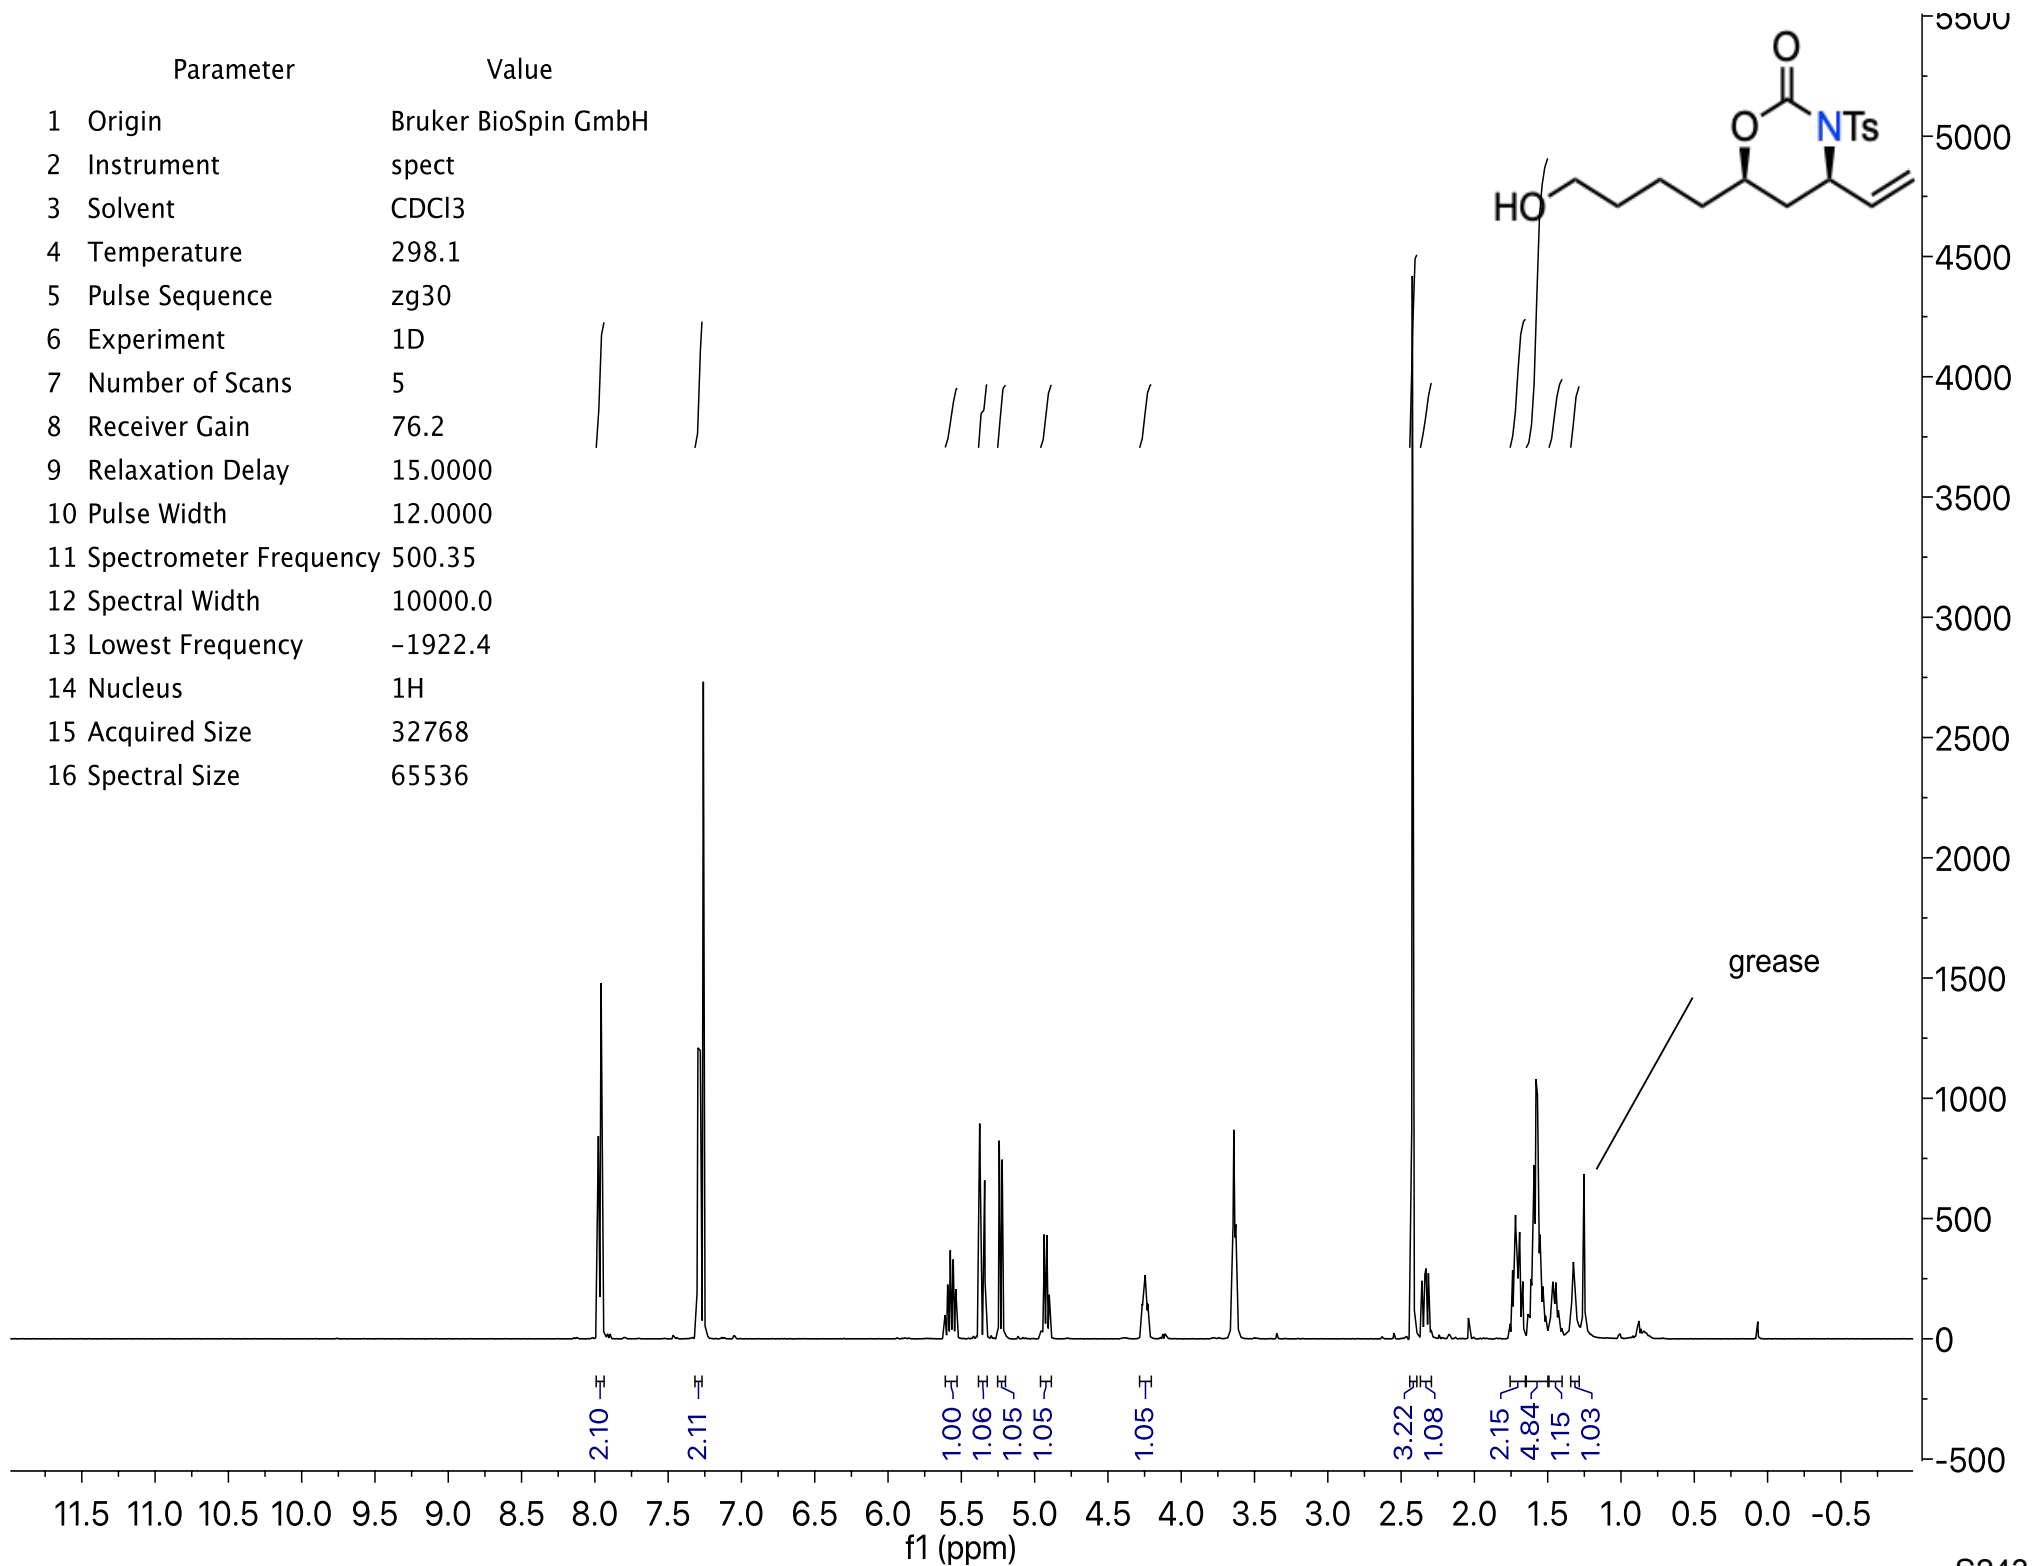

| Parameter                 | Value               |
|---------------------------|---------------------|
| 1 Origin                  | Bruker BioSpin GmbH |
| 2 Instrument              | spect               |
| 3 Solvent                 | CDCl3               |
| 4 Temperature             | 298.2               |
| 5 Pulse Sequence          | zgpg30              |
| 6 Experiment              | 1D                  |
| 7 Number of Scans         | 512                 |
| 8 Receiver Gain           | 190.5               |
| 9 Relaxation Delay        | 1.0000              |
| 10 Pulse Width            | 10.0000             |
| 11 Spectrometer Frequency | 125.83              |
| 12 Spectral Width         | 31512.6             |
| 13 Lowest Frequency       | -1899.2             |
| 14 Nucleus                | 13C                 |
| 15 Acquired Size          | 32768               |
| 16 Spectral Size          | 65536               |

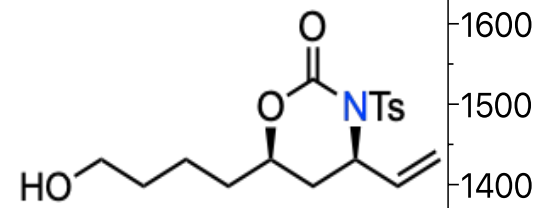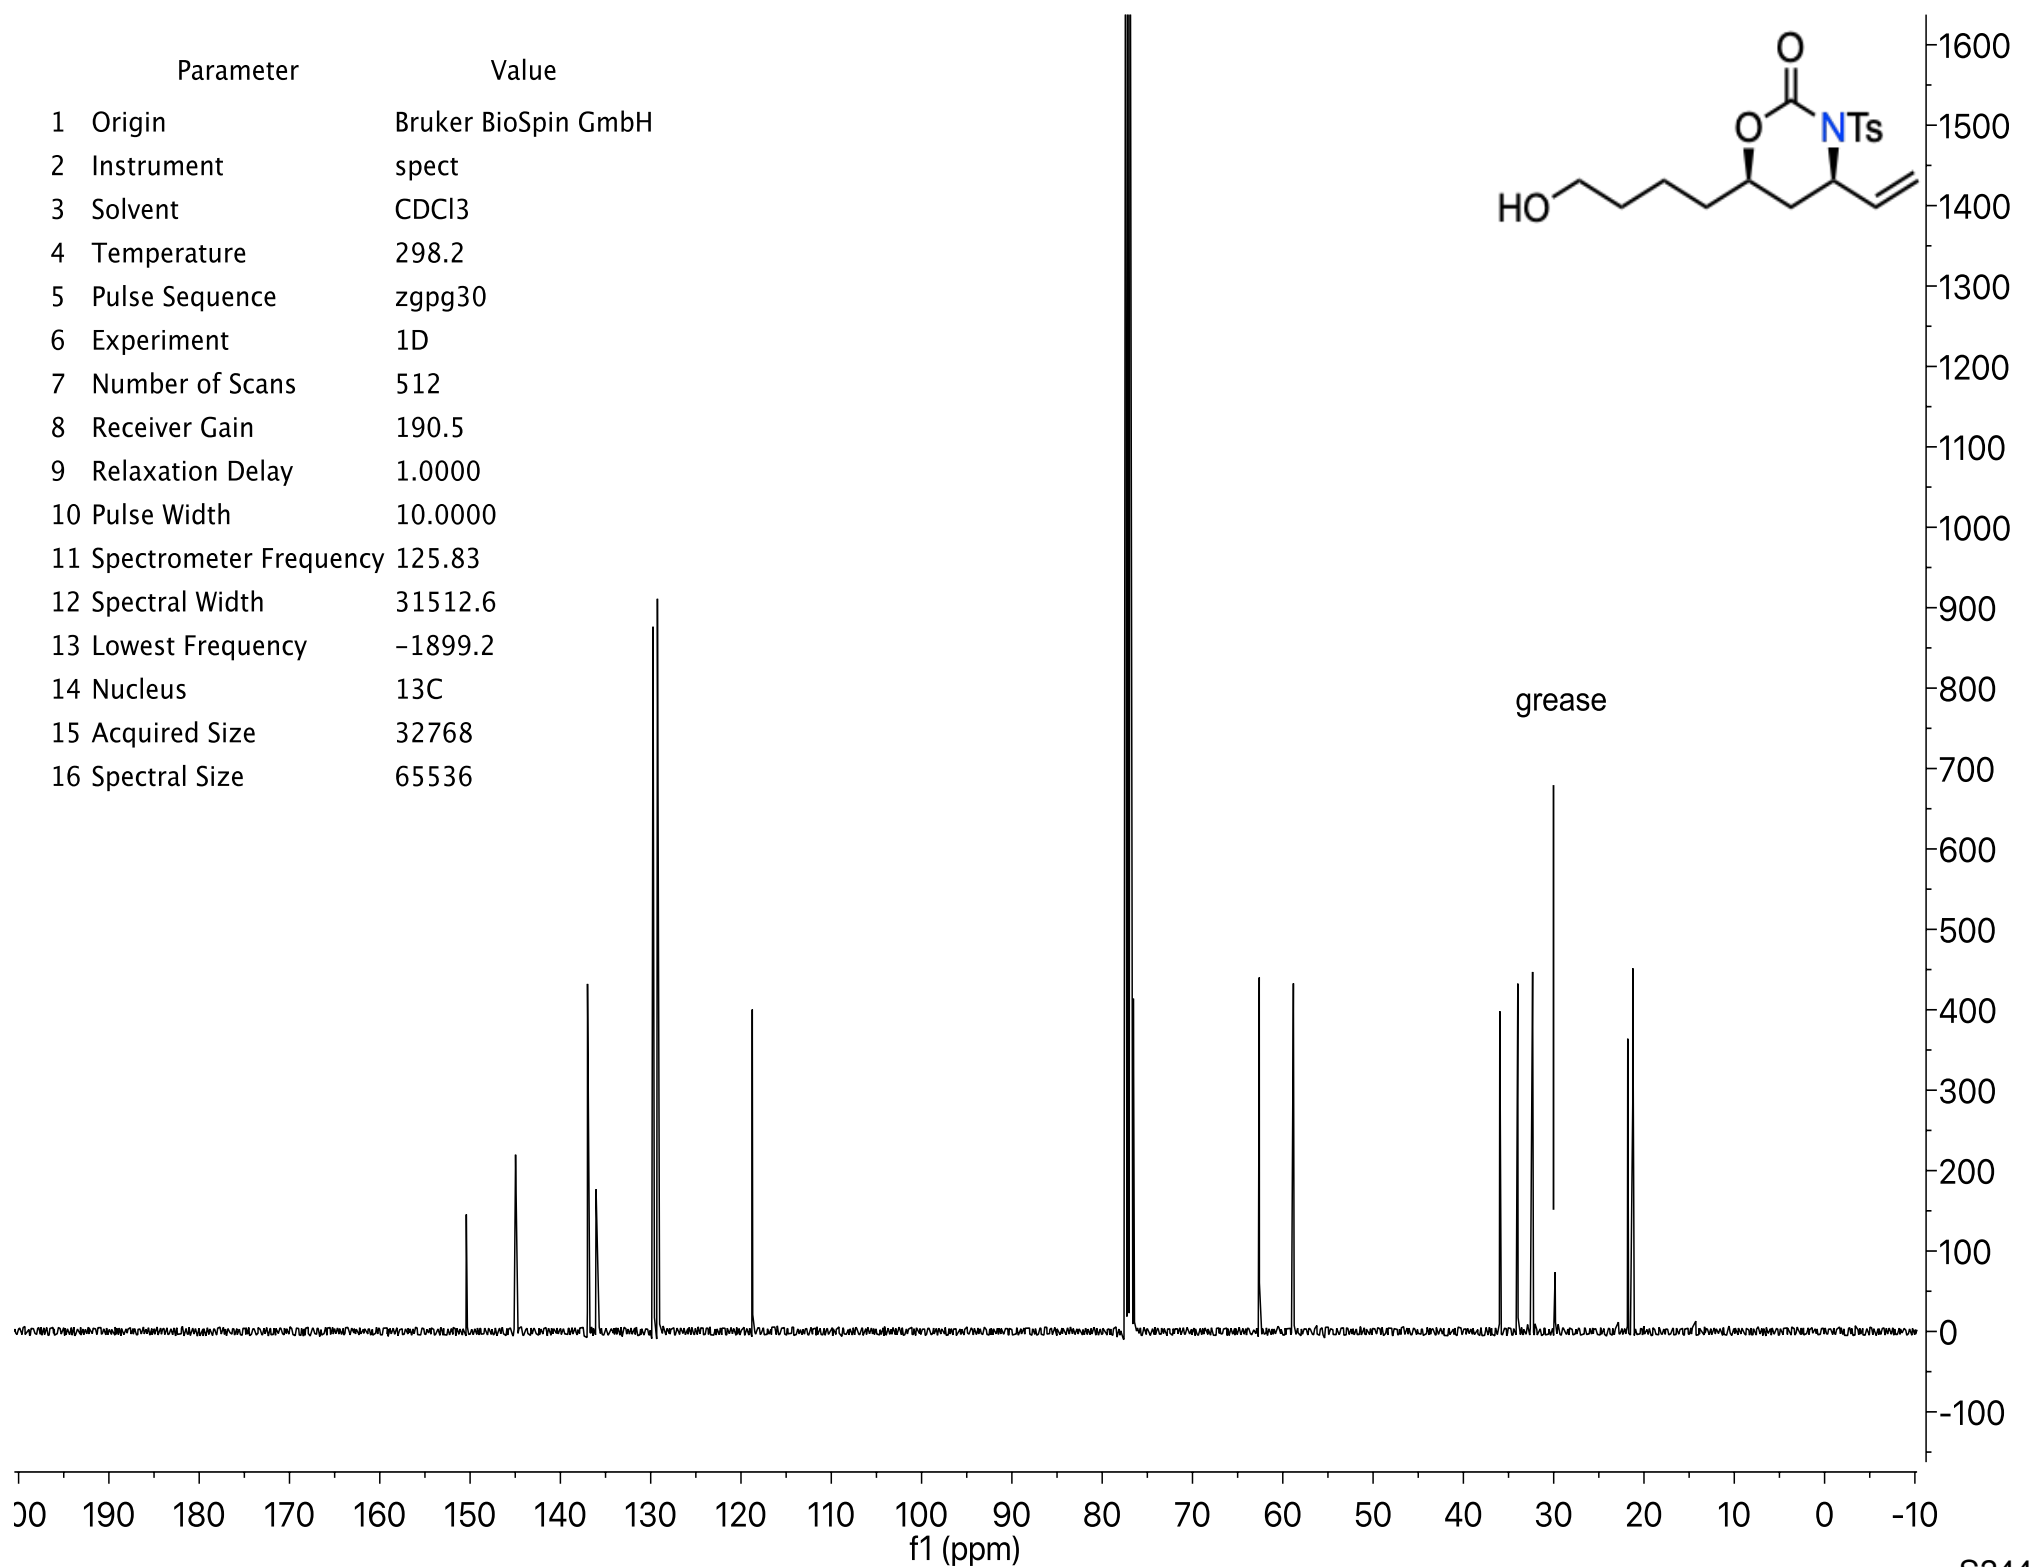

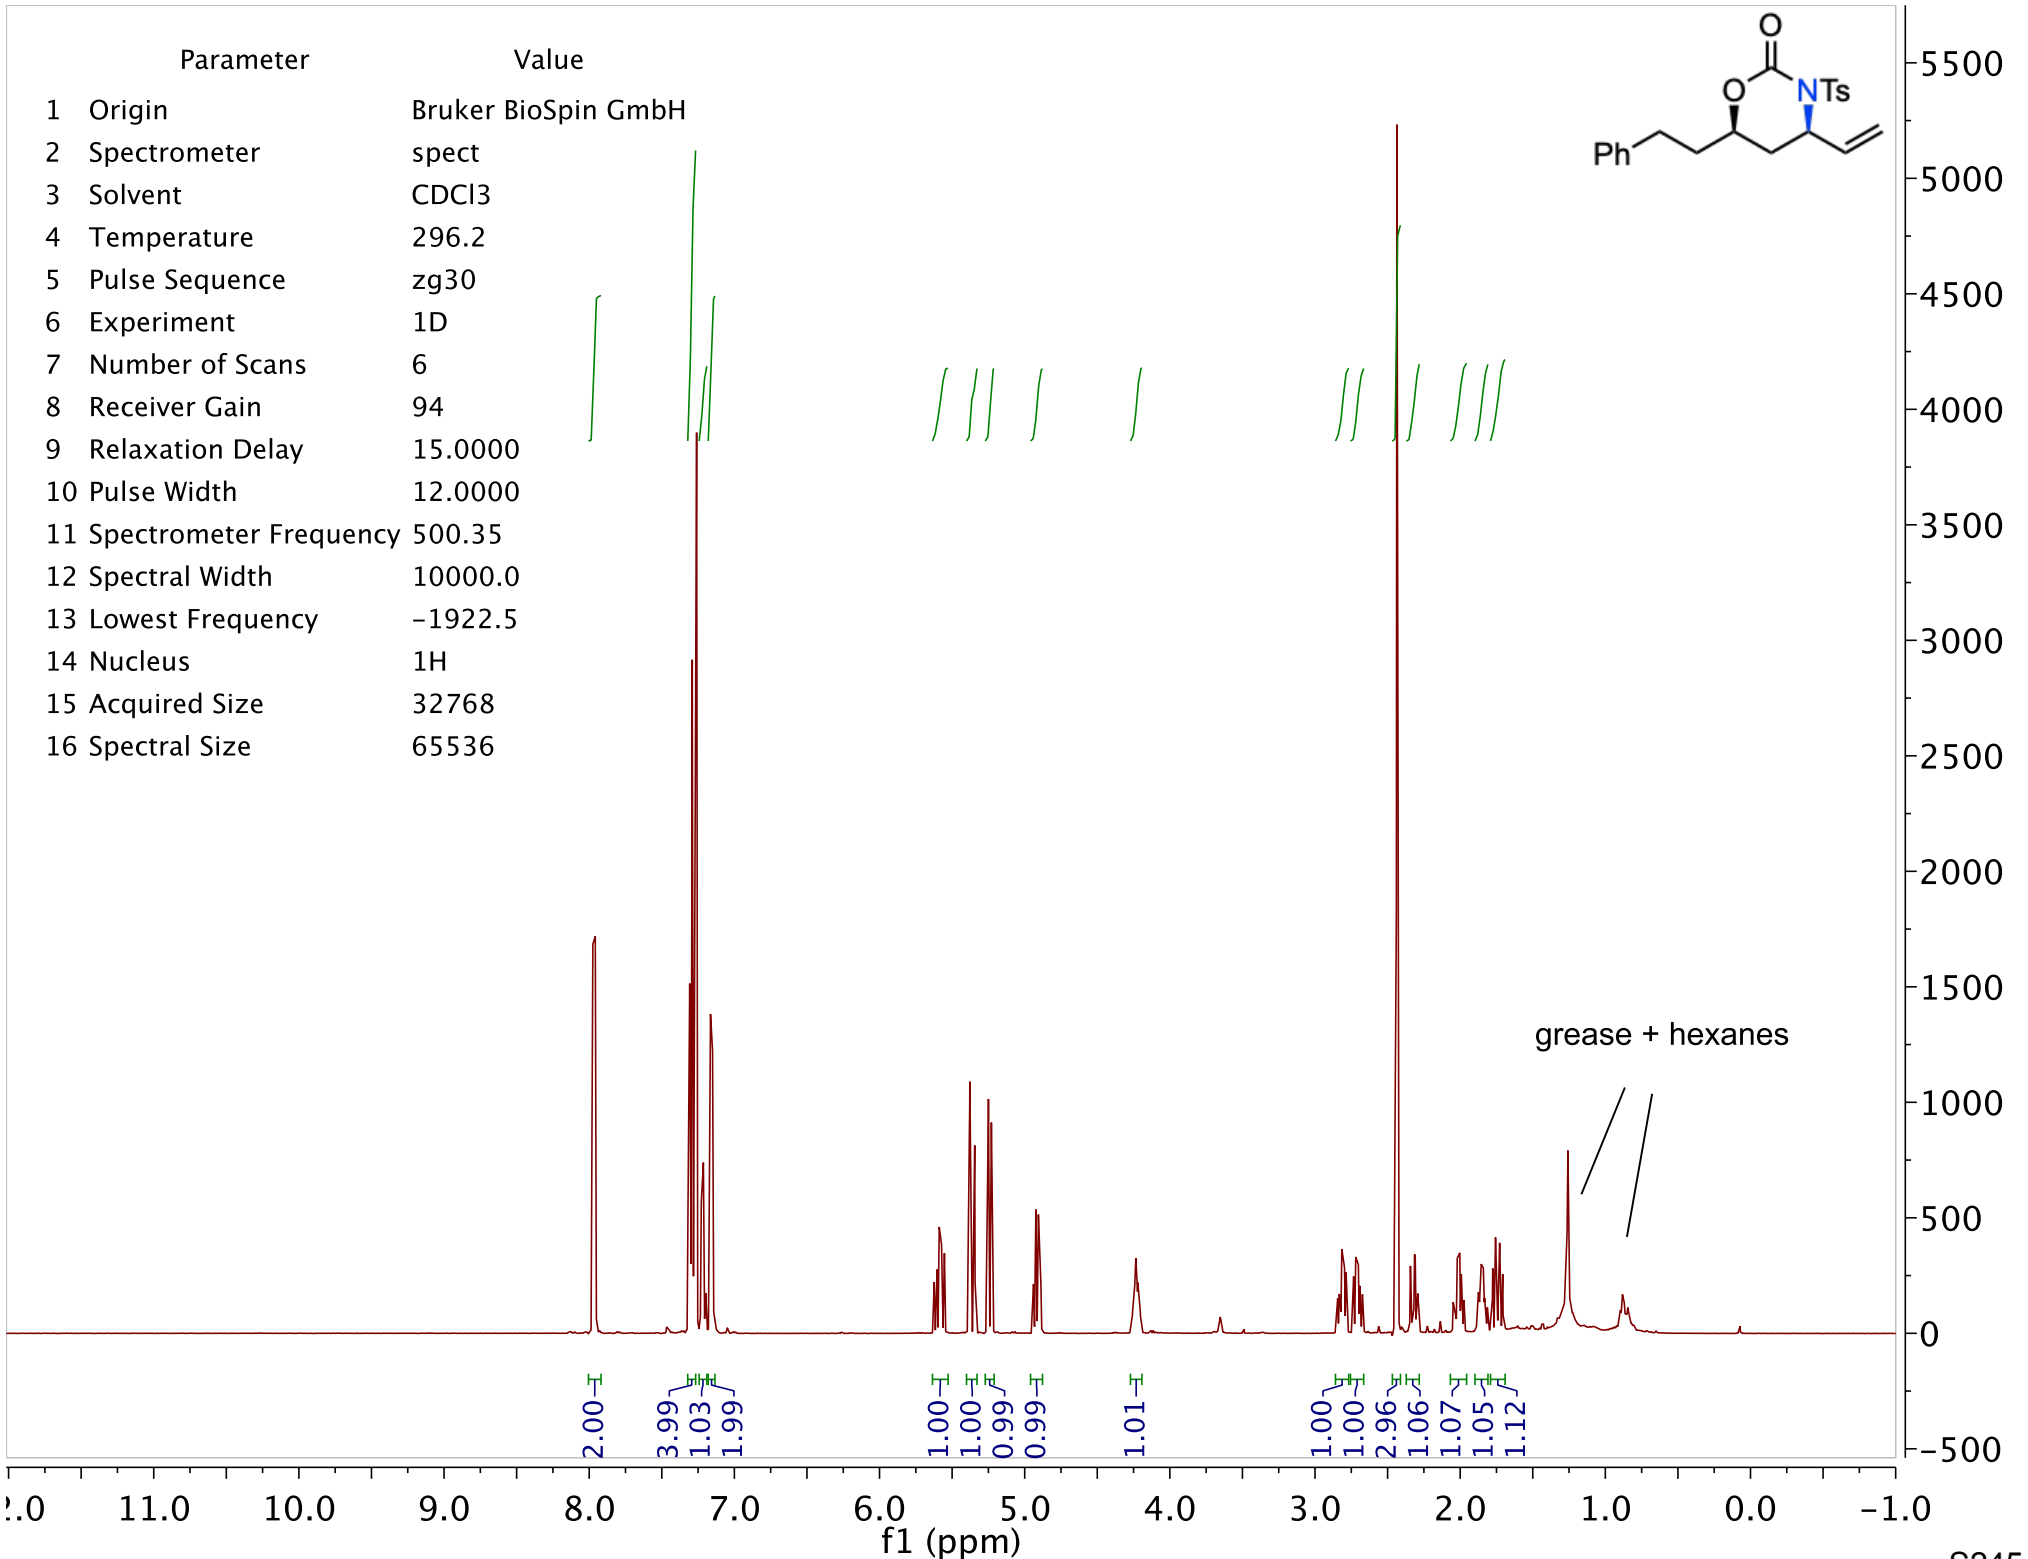

| Parameter                 | Value               |
|---------------------------|---------------------|
| 1 Origin                  | Bruker BioSpin GmbH |
| 2 Spectrometer            | spect               |
| 3 Solvent                 | CDCl3               |
| 4 Temperature             | 296.2               |
| 5 Pulse Sequence          | zgpg30              |
| 6 Experiment              | 1D                  |
| 7 Number of Scans         | 1000                |
| 8 Receiver Gain           | 191                 |
| 9 Relaxation Delay        | 1.0000              |
| 10 Pulse Width            | 10.0000             |
| 11 Spectrometer Frequency | 125.83              |
| 12 Spectral Width         | 31512.6             |
| 13 Lowest Frequency       | -1899.7             |
| 14 Nucleus                | 13C                 |
| 15 Acquired Size          | 32768               |
| 16 Spectral Size          | 65536               |

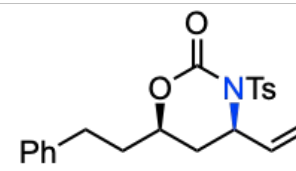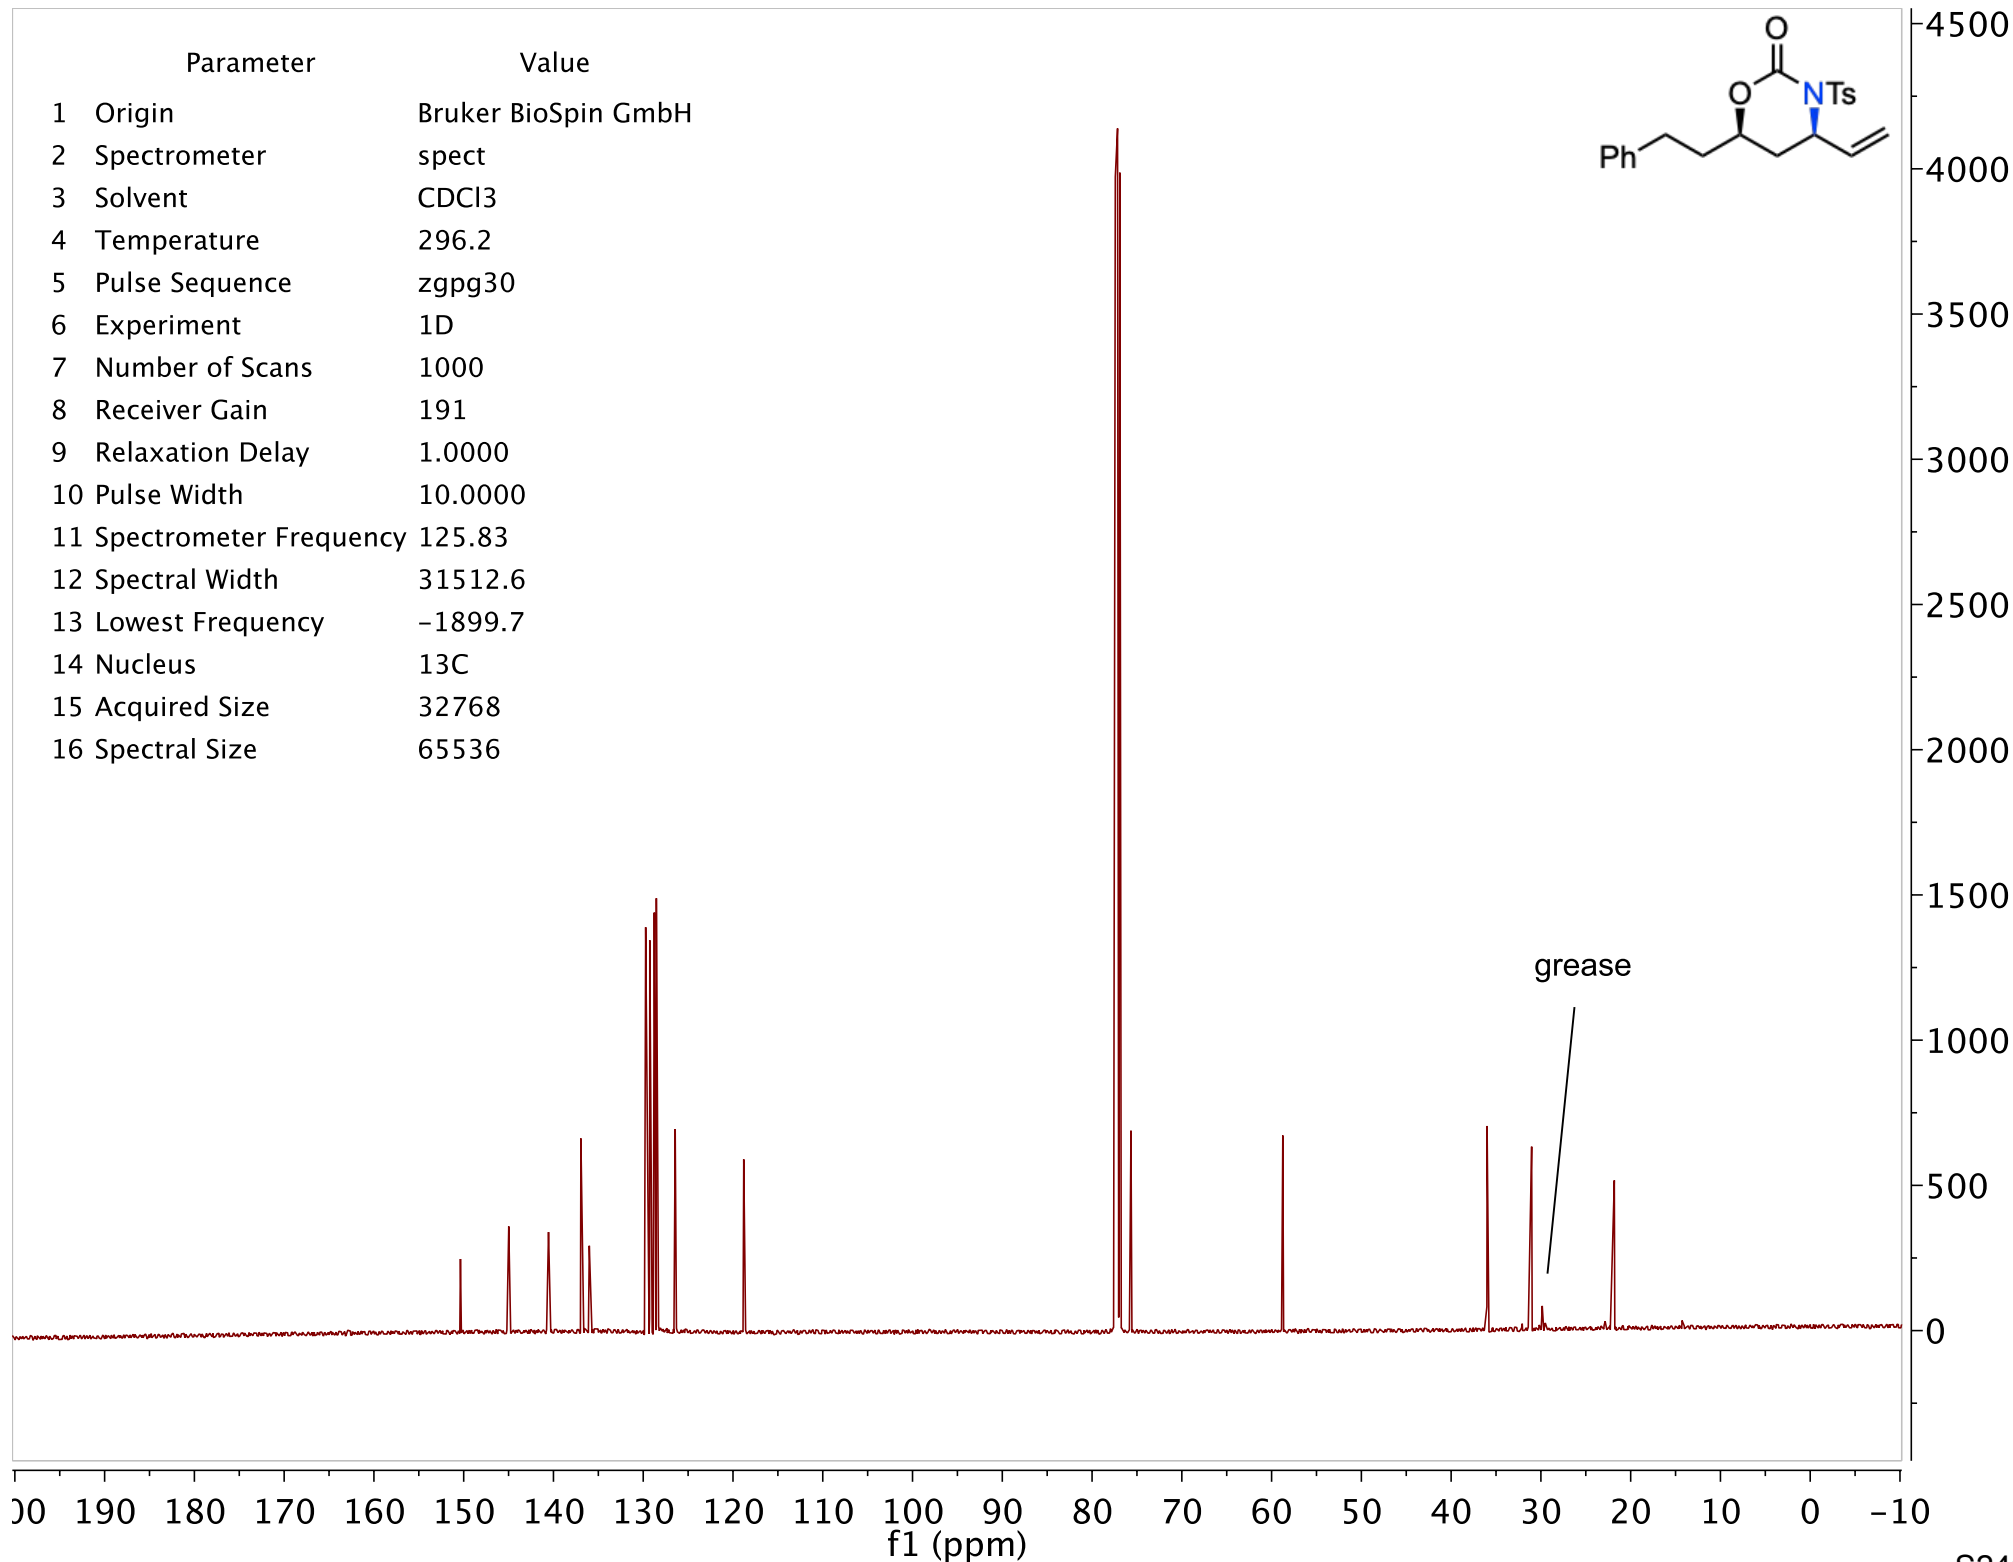



| Parameter                 | Value               |
|---------------------------|---------------------|
| 1 Origin                  | Bruker BioSpin GmbH |
| 2 Instrument              | spect               |
| 3 Solvent                 | CDCl3               |
| 4 Temperature             | 289.0               |
| 5 Pulse Sequence          | zg30                |
| 6 Experiment              | 1D                  |
| 7 Number of Scans         | 16                  |
| 8 Receiver Gain           | 29.7                |
| 9 Relaxation Delay        | 15.0000             |
| 10 Pulse Width            | 12.0000             |
| 11 Spectrometer Frequency | 500.35              |
| 12 Spectral Width         | 10000.0             |
| 13 Lowest Frequency       | -1921.3             |
| 14 Nucleus                | 1H                  |
| 15 Acquired Size          | 32768               |
| 16 Spectral Size          | 65536               |

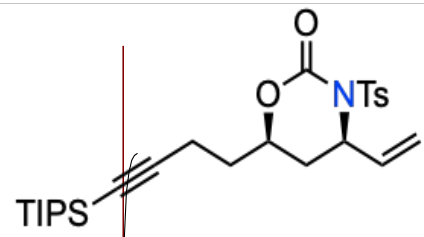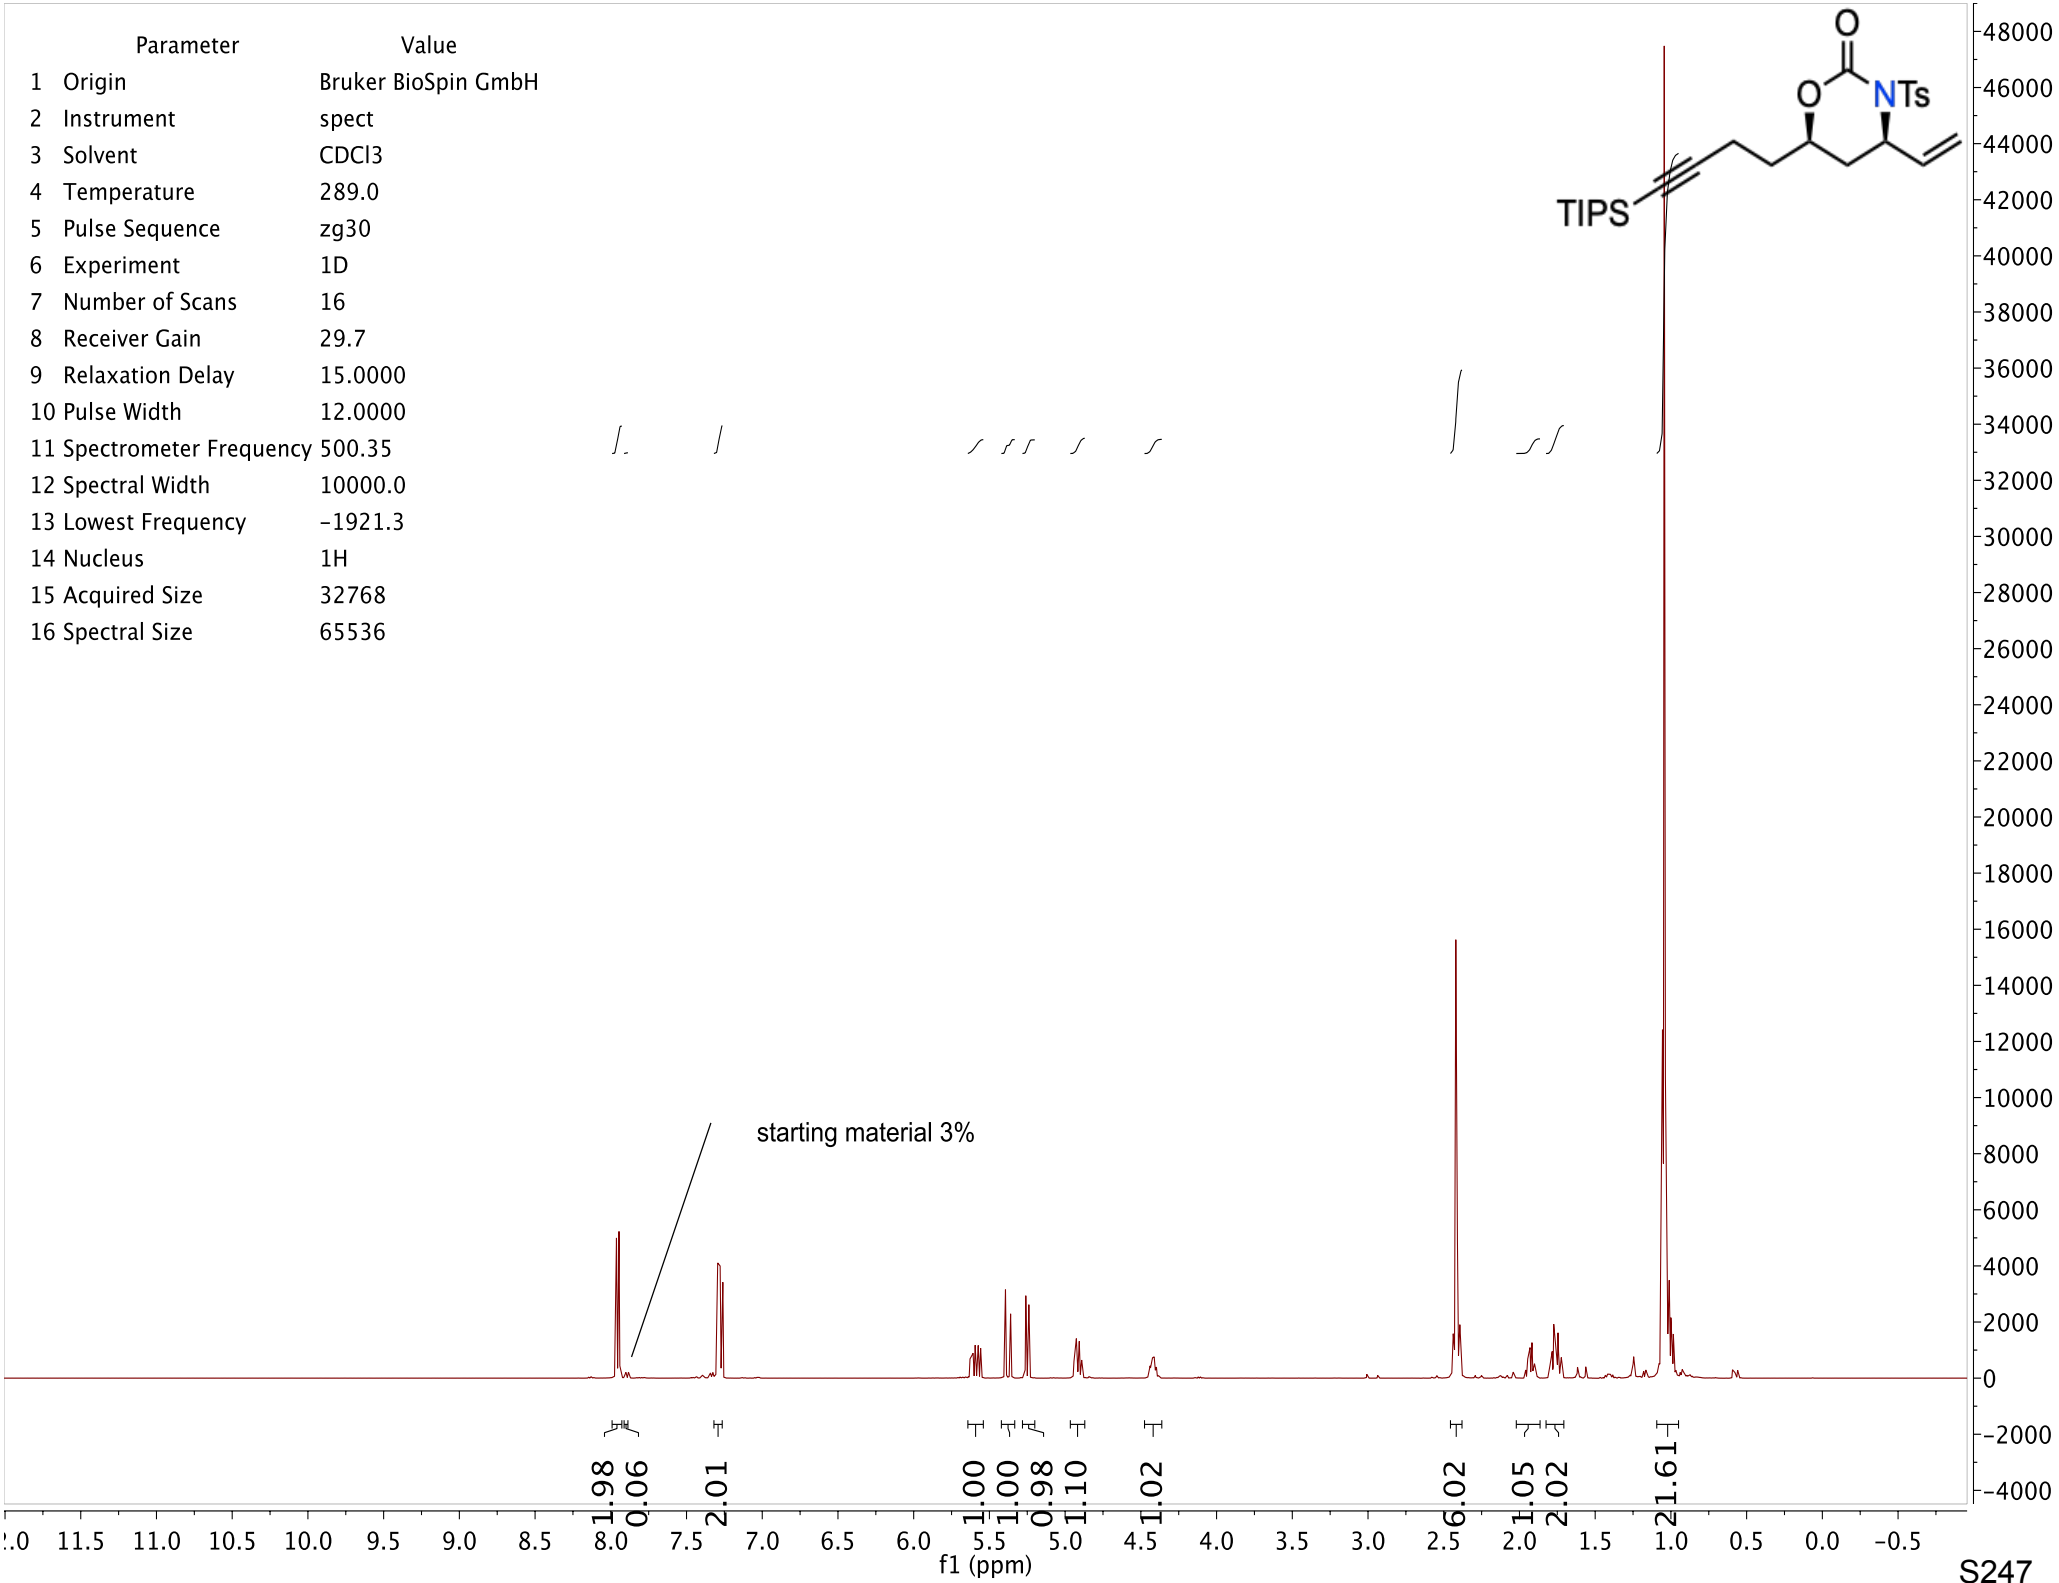

| Parameter                 | Value               |
|---------------------------|---------------------|
| 1 Origin                  | Bruker BioSpin GmbH |
| 2 Instrument              | spect               |
| 3 Solvent                 | CDCl3               |
| 4 Temperature             | 289.1               |
| 5 Pulse Sequence          | zgpg30              |
| 6 Experiment              | 1D                  |
| 7 Number of Scans         | 2056                |
| 8 Receiver Gain           | 190.5               |
| 9 Relaxation Delay        | 2.0000              |
| 10 Pulse Width            | 10.0000             |
| 11 Spectrometer Frequency | 125.83              |
| 12 Spectral Width         | 31512.6             |
| 13 Lowest Frequency       | -1892.2             |
| 14 Nucleus                | 13C                 |
| 15 Acquired Size          | 32768               |
| 16 Spectral Size          | 65536               |

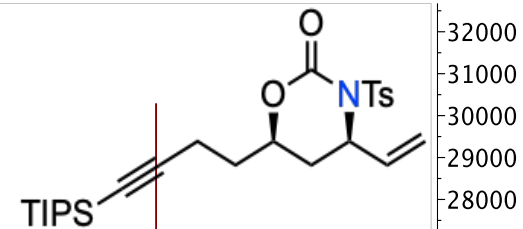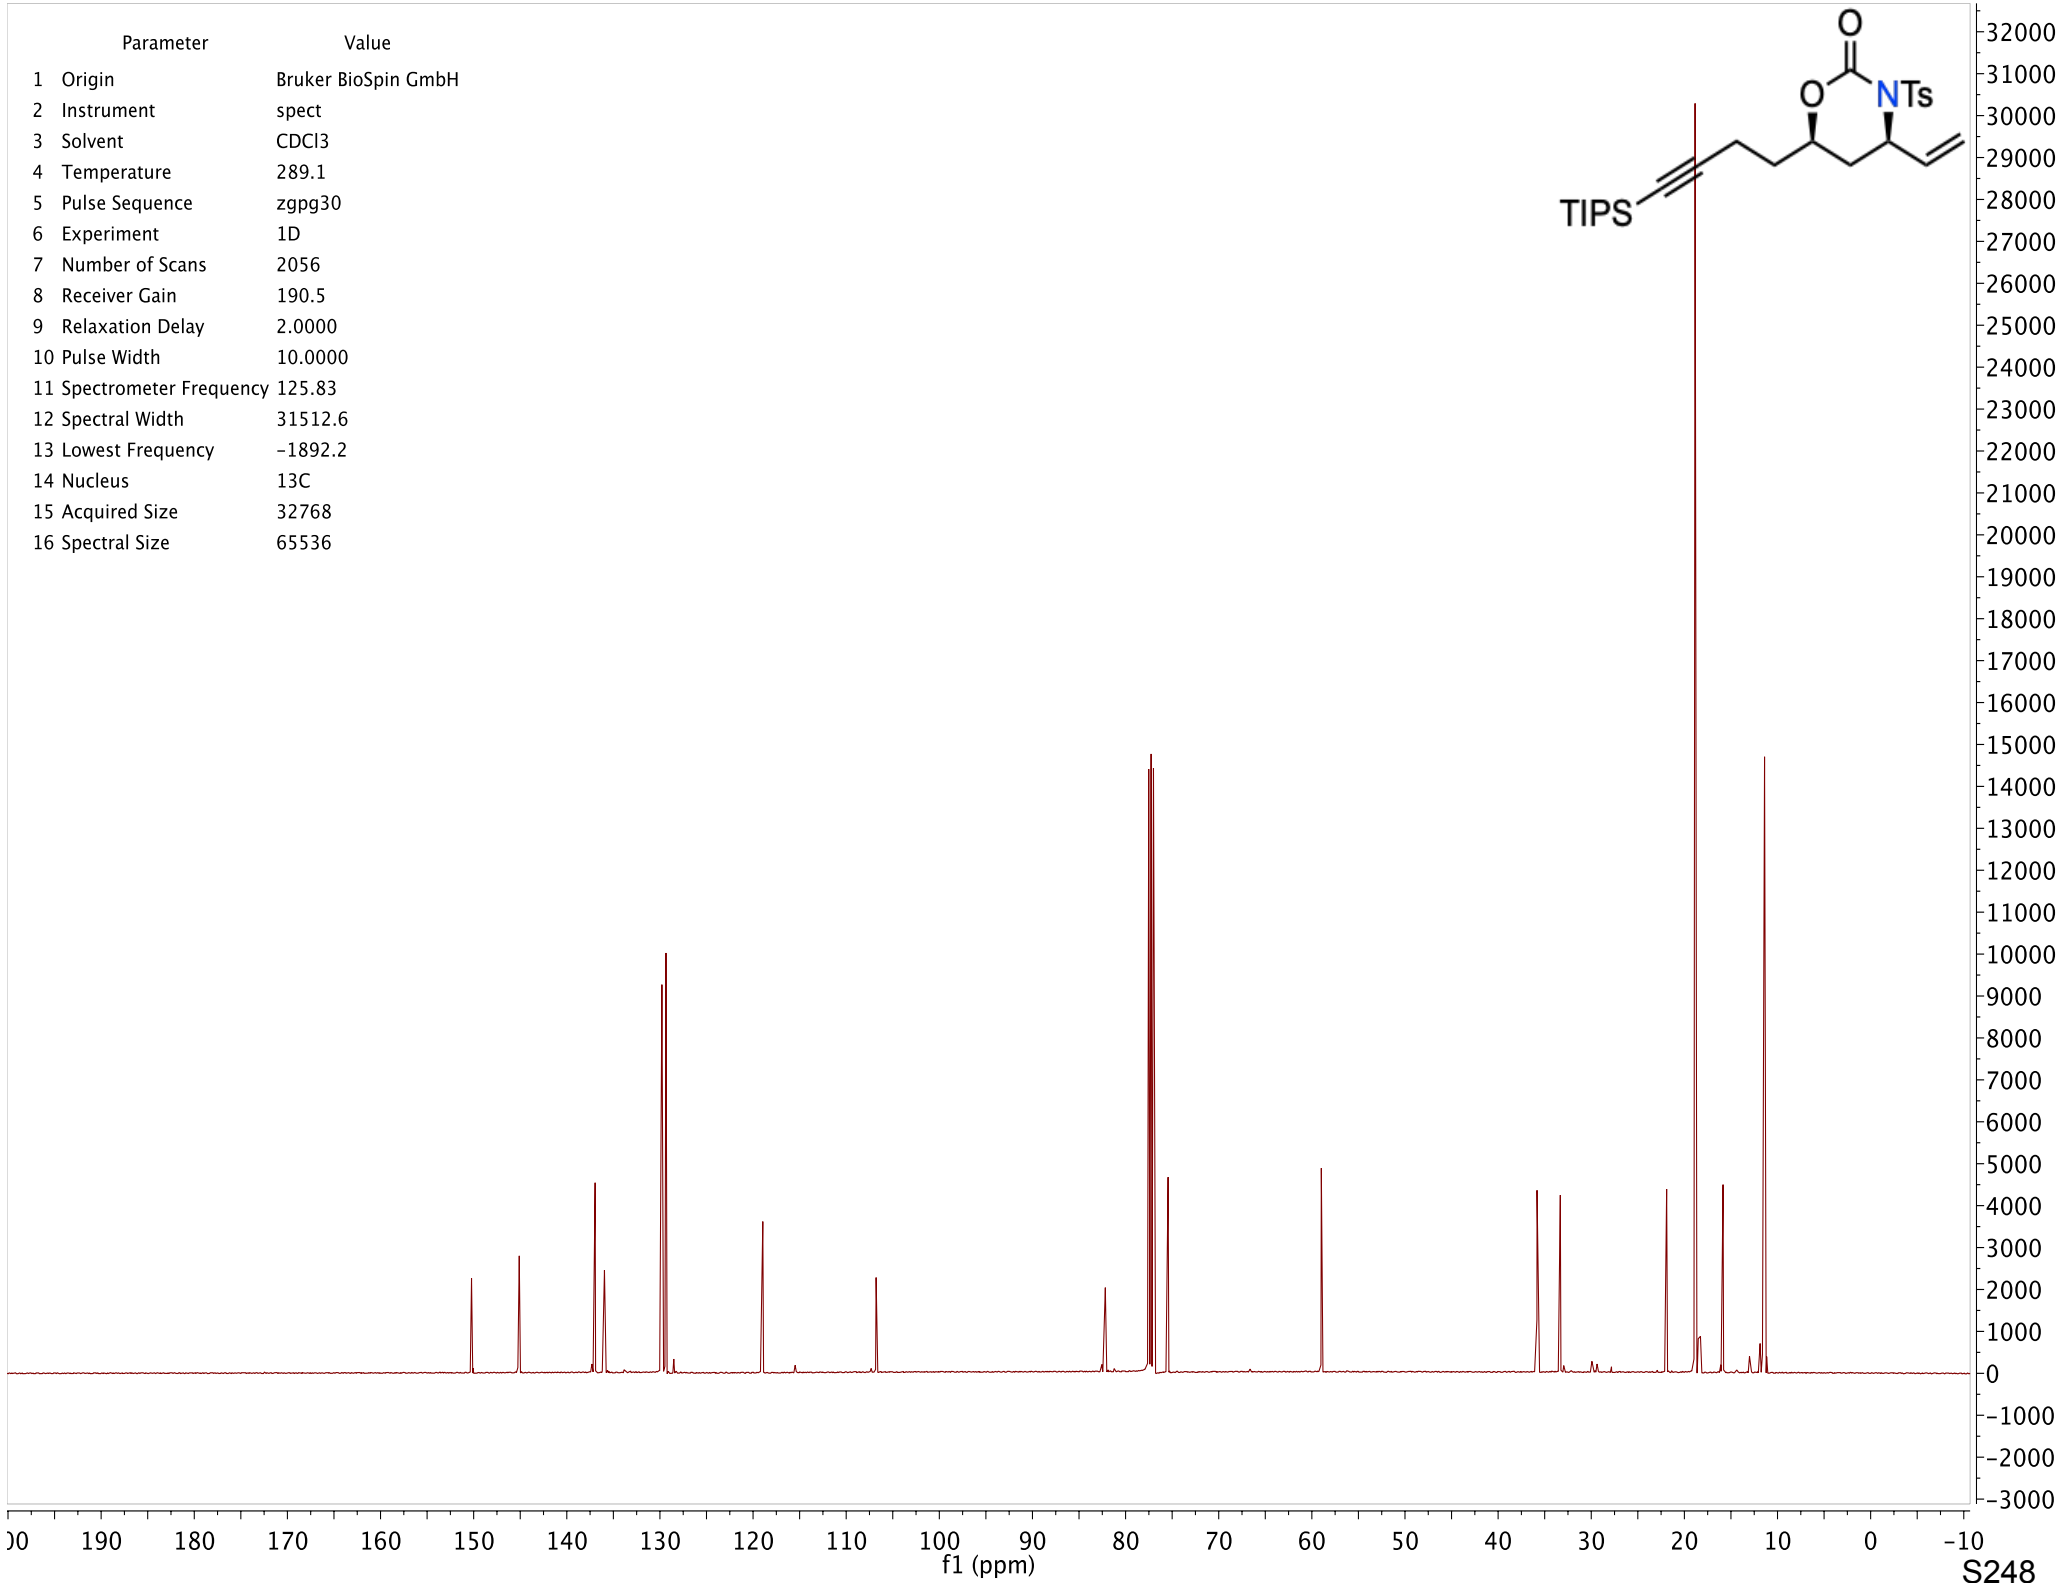

| Parameter                 | Value               |
|---------------------------|---------------------|
| 1 Origin                  | Bruker BioSpin GmbH |
| 2 Spectrometer            | spect               |
| 3 Solvent                 | CDCl3               |
| 4 Temperature             | 298.1               |
| 5 Pulse Sequence          | zg30                |
| 6 Experiment              | 1D                  |
| 7 Number of Scans         | 4                   |
| 8 Receiver Gain           | 30                  |
| 9 Relaxation Delay        | 15.0000             |
| 10 Pulse Width            | 12.0000             |
| 11 Spectrometer Frequency | 500.35              |
| 12 Spectral Width         | 10000.0             |
| 13 Lowest Frequency       | -1921.3             |
| 14 Nucleus                | 1H                  |
| 15 Acquired Size          | 32768               |
| 16 Spectral Size          | 65536               |

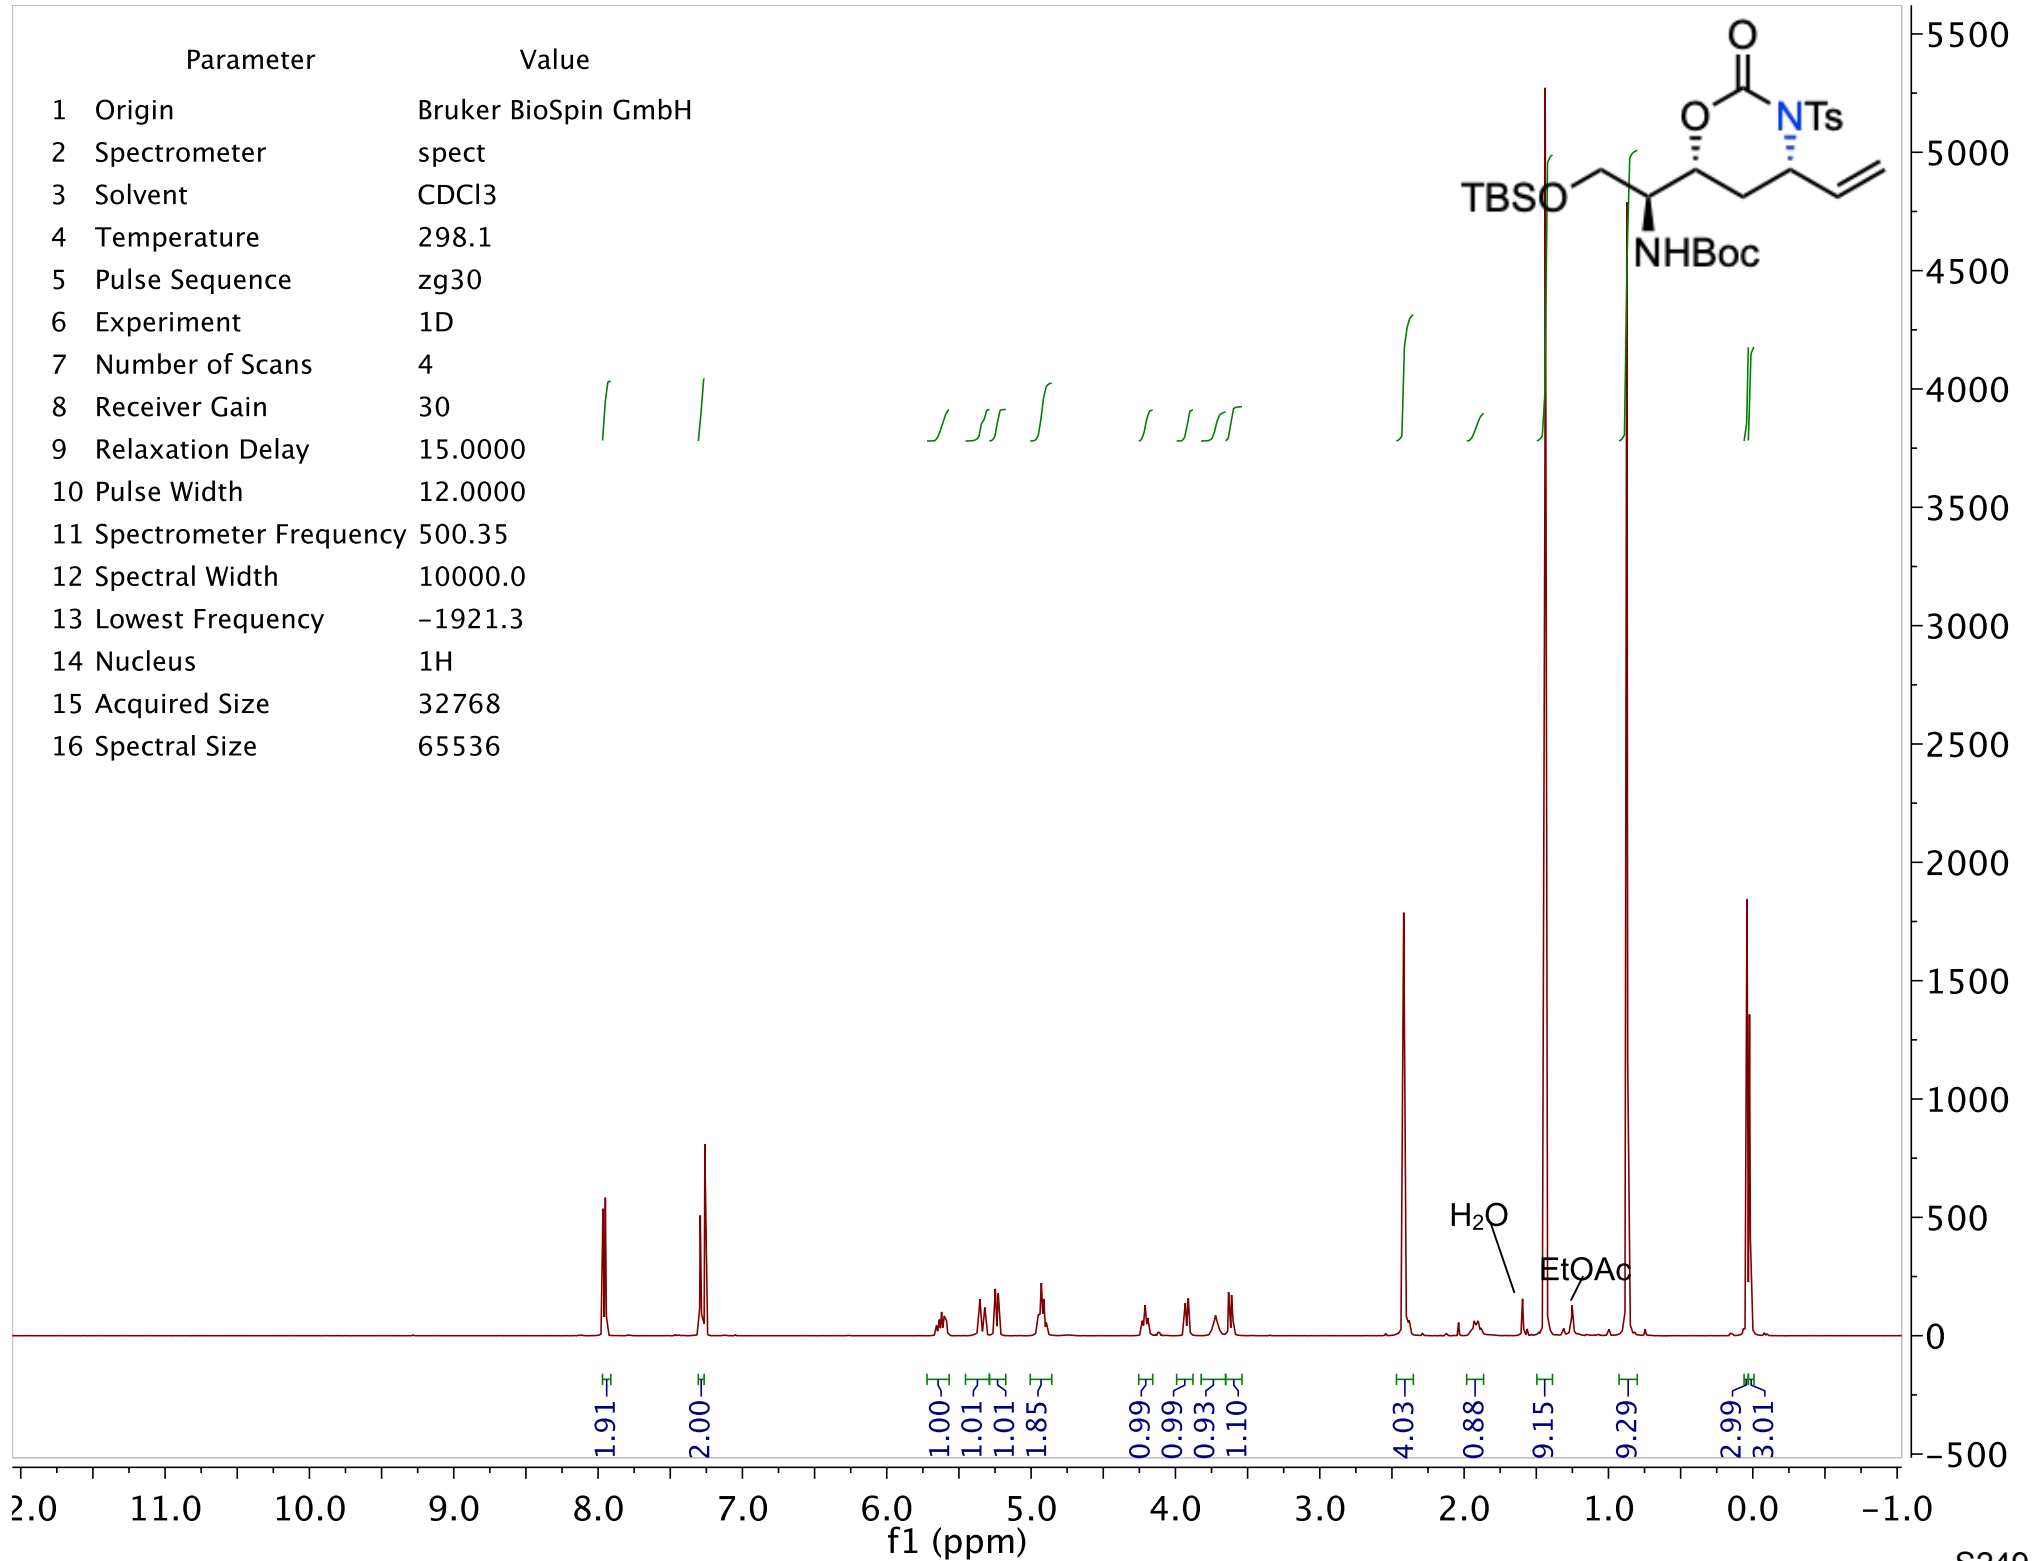

| Parameter                 | Value               |
|---------------------------|---------------------|
| 1 Origin                  | Bruker BioSpin GmbH |
| 2 Spectrometer            | spect               |
| 3 Solvent                 | CDCl3               |
| 4 Temperature             | 298.2               |
| 5 Pulse Sequence          | zgpg30              |
| 6 Experiment              | 1D                  |
| 7 Number of Scans         | 512                 |
| 8 Receiver Gain           | 191                 |
| 9 Relaxation Delay        | 1.0000              |
| 10 Pulse Width            | 10.0000             |
| 11 Spectrometer Frequency | 125.83              |
| 12 Spectral Width         | 31512.6             |
| 13 Lowest Frequency       | -1916.9             |
| 14 Nucleus                | 13C                 |
| 15 Acquired Size          | 32768               |
| 16 Spectral Size          | 65536               |

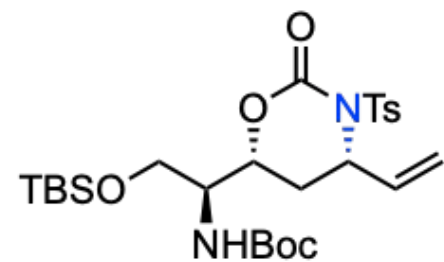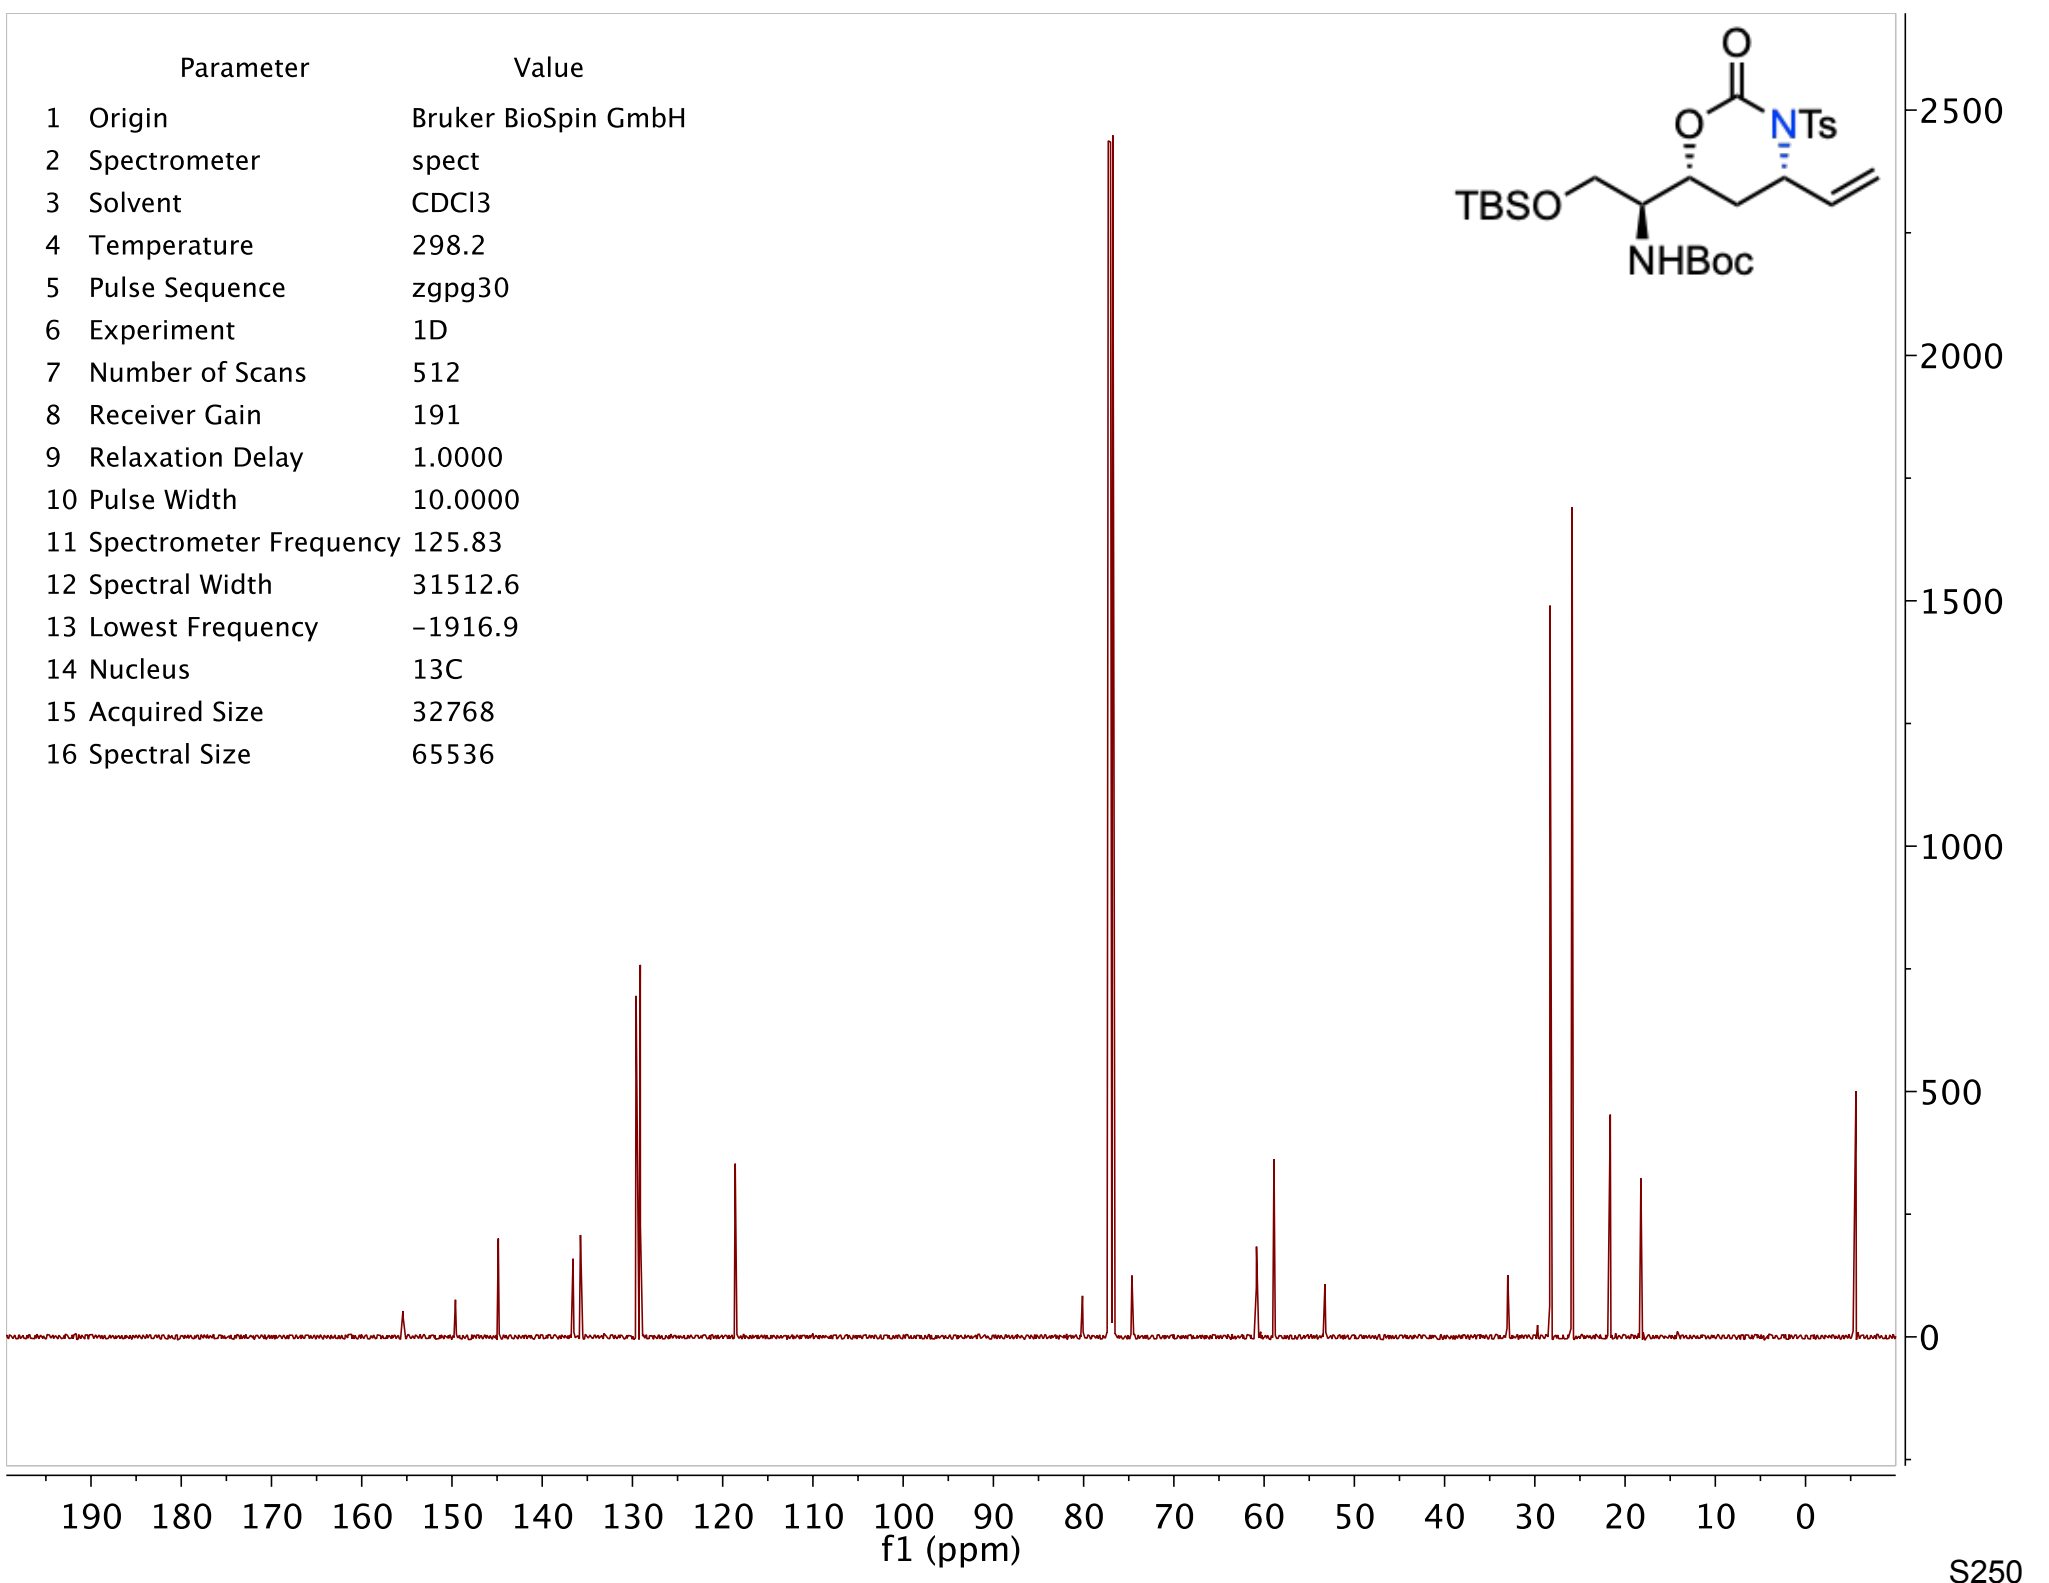

| Parameter                 | Value   |
|---------------------------|---------|
| 1 Origin                  | Varian  |
| 2 Spectrometer            | inova   |
| 3 Solvent                 | CDCl3   |
| 4 Temperature             | 20.0    |
| 5 Pulse Sequence          | s2pul   |
| 6 Experiment              | 1D      |
| 7 Number of Scans         | 8       |
| 8 Receiver Gain           | 58      |
| 9 Relaxation Delay        | 10.0000 |
| 10 Pulse Width            | 6.5000  |
| 11 Spectrometer Frequency | 499.69  |
| 12 Spectral Width         | 7024.9  |
| 13 Lowest Frequency       | -1032.9 |
| 14 Nucleus                | 1H      |
| 15 Acquired Size          | 32768   |
| 16 Spectral Size          | 65536   |

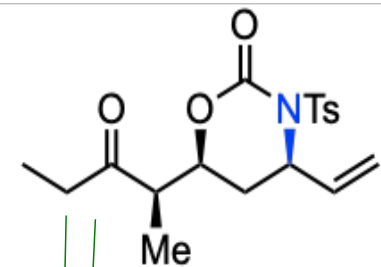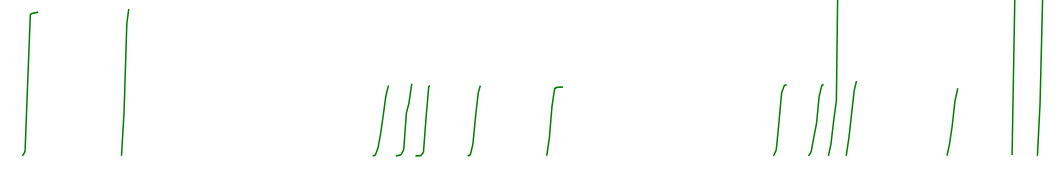

2.04  
2.09  
1.00  
1.02  
1.00  
1.00  
0.98  
1.01  
1.02  
4.12  
1.06  
0.96  
3.16  
3.11

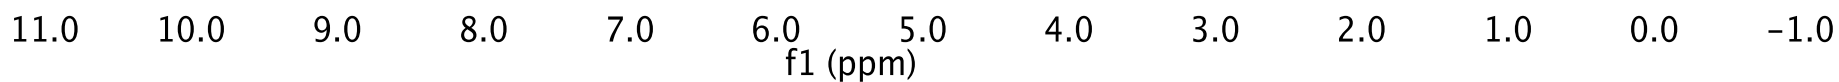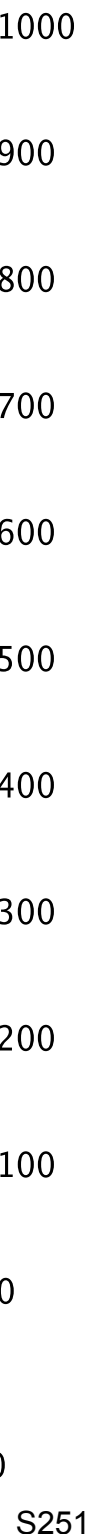

| Parameter                 | Value   |
|---------------------------|---------|
| 1 Origin                  | Varian  |
| 2 Spectrometer            | inova   |
| 3 Solvent                 | CDCl3   |
| 4 Temperature             | 20.0    |
| 5 Pulse Sequence          | s2pul   |
| 6 Experiment              | 1D      |
| 7 Number of Scans         | 16000   |
| 8 Receiver Gain           | 60      |
| 9 Relaxation Delay        | 1.0000  |
| 10 Pulse Width            | 6.0000  |
| 11 Spectrometer Frequency | 125.66  |
| 12 Spectral Width         | 30165.9 |
| 13 Lowest Frequency       | -1287.3 |
| 14 Nucleus                | 13C     |
| 15 Acquired Size          | 32768   |
| 16 Spectral Size          | 65536   |

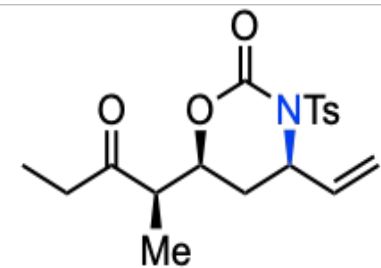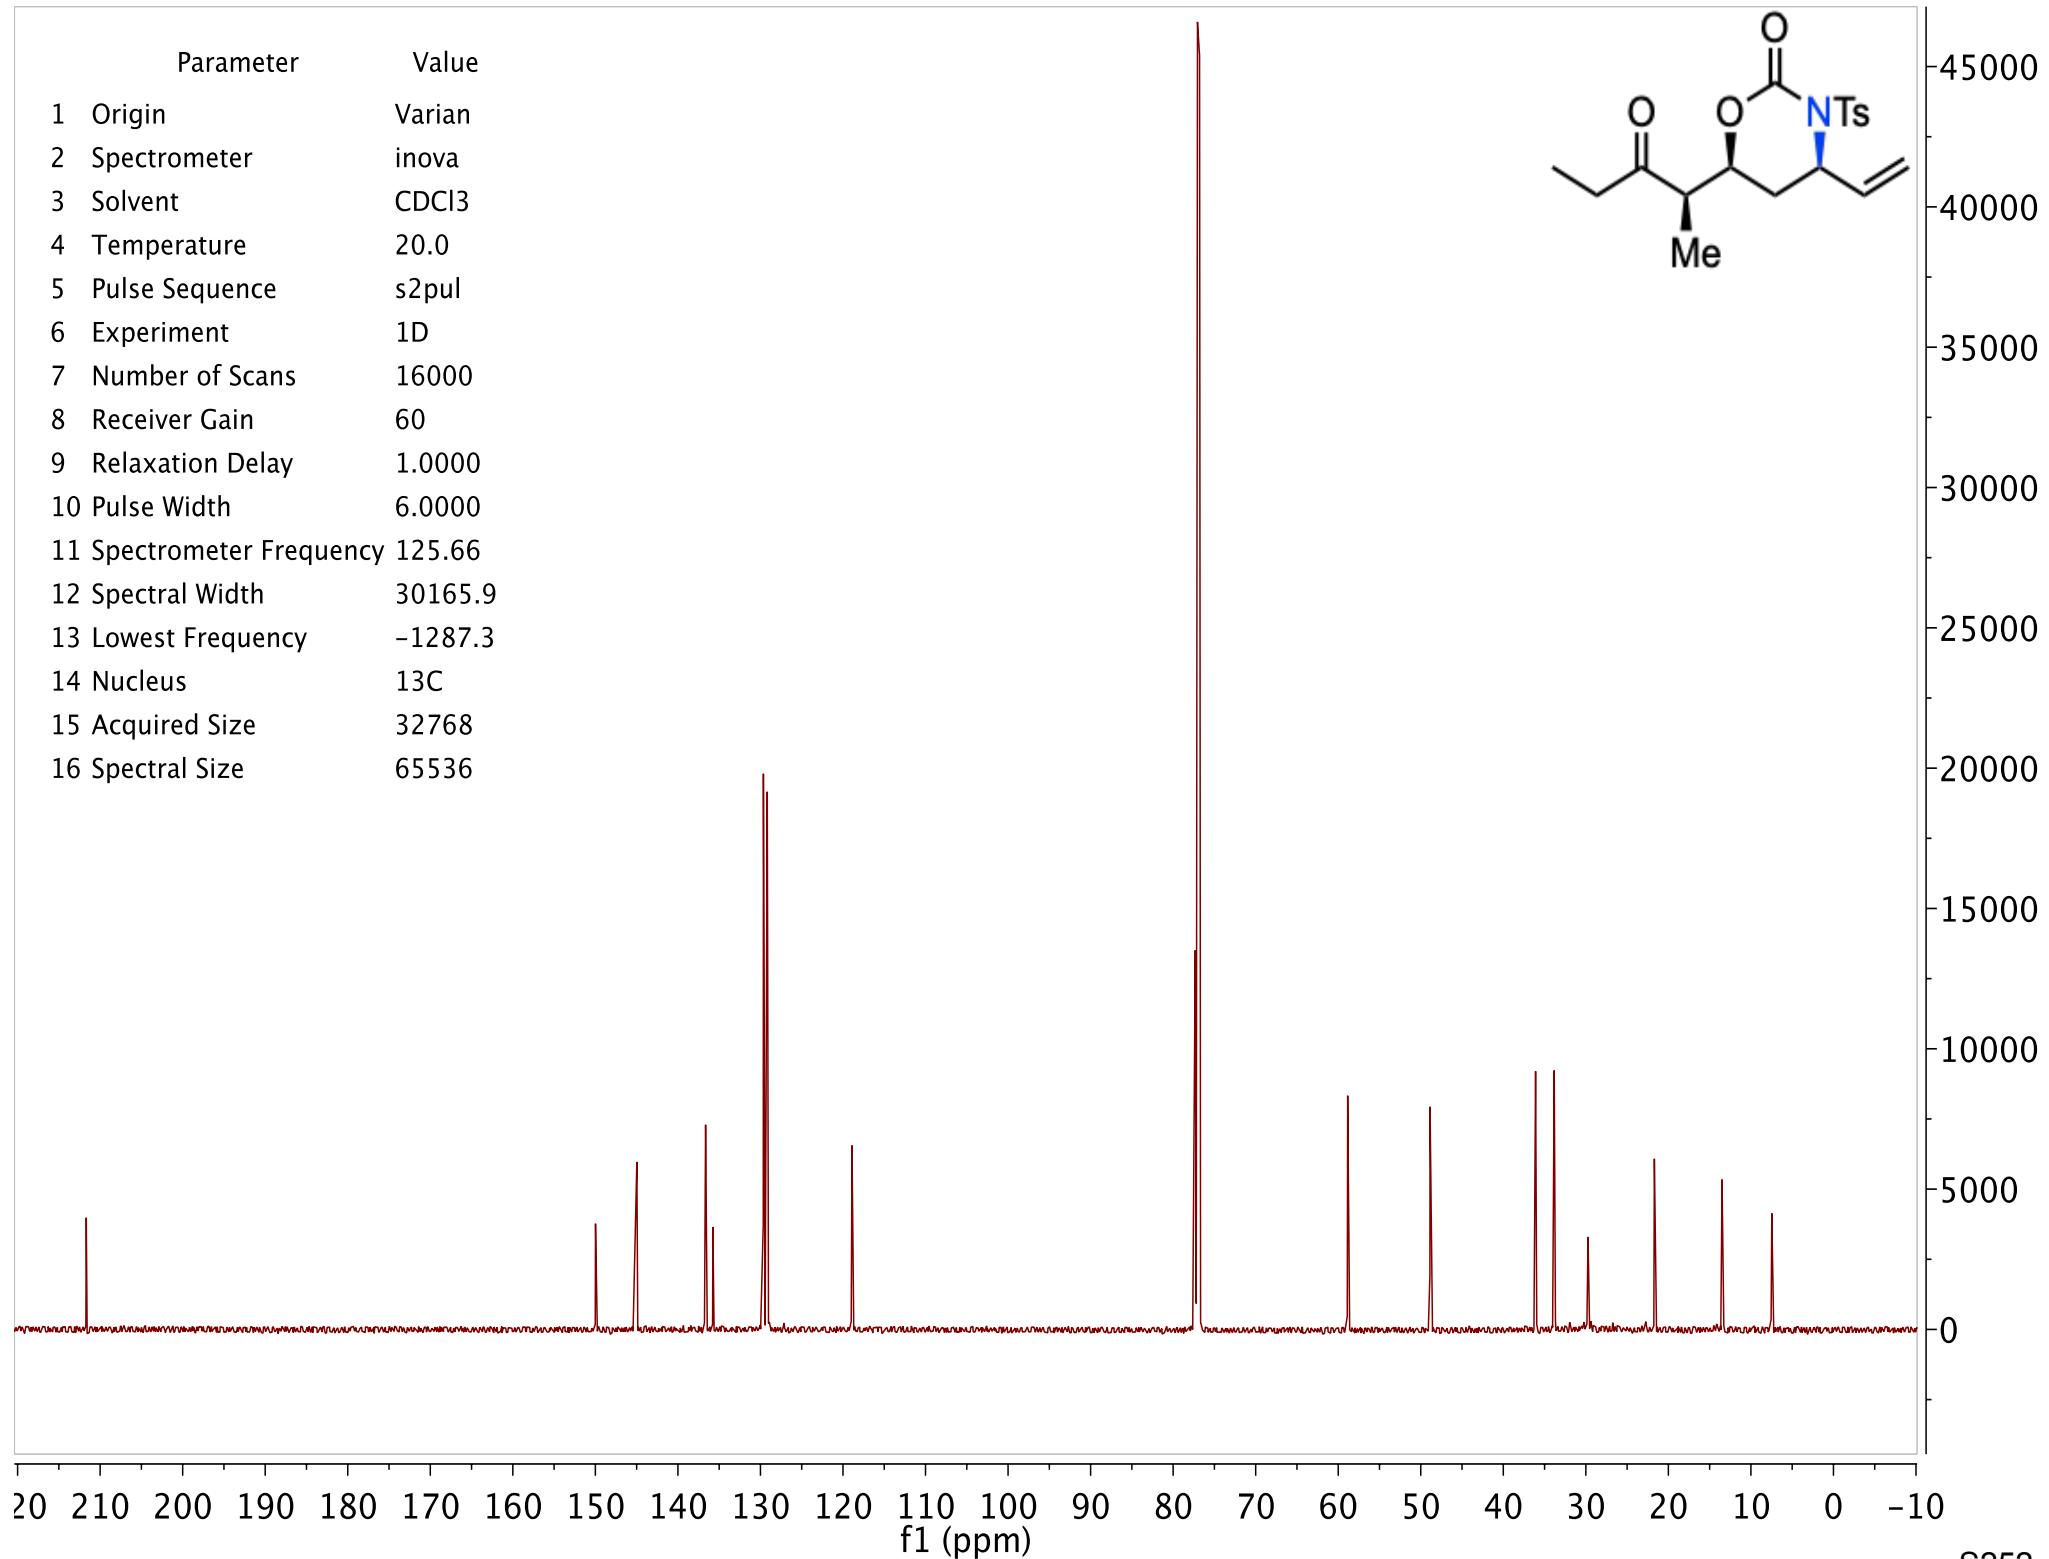

| Parameter                 | Value               |
|---------------------------|---------------------|
| 1 Origin                  | Bruker BioSpin GmbH |
| 2 Spectrometer            | spect               |
| 3 Solvent                 | CDCl3               |
| 4 Temperature             | 296.1               |
| 5 Pulse Sequence          | zg30                |
| 6 Experiment              | 1D                  |
| 7 Number of Scans         | 6                   |
| 8 Receiver Gain           | 30                  |
| 9 Relaxation Delay        | 15.0000             |
| 10 Pulse Width            | 12.0000             |
| 11 Spectrometer Frequency | 500.35              |
| 12 Spectral Width         | 10000.0             |
| 13 Lowest Frequency       | -1923.1             |
| 14 Nucleus                | 1H                  |
| 15 Acquired Size          | 32768               |
| 16 Spectral Size          | 65536               |

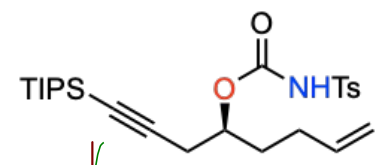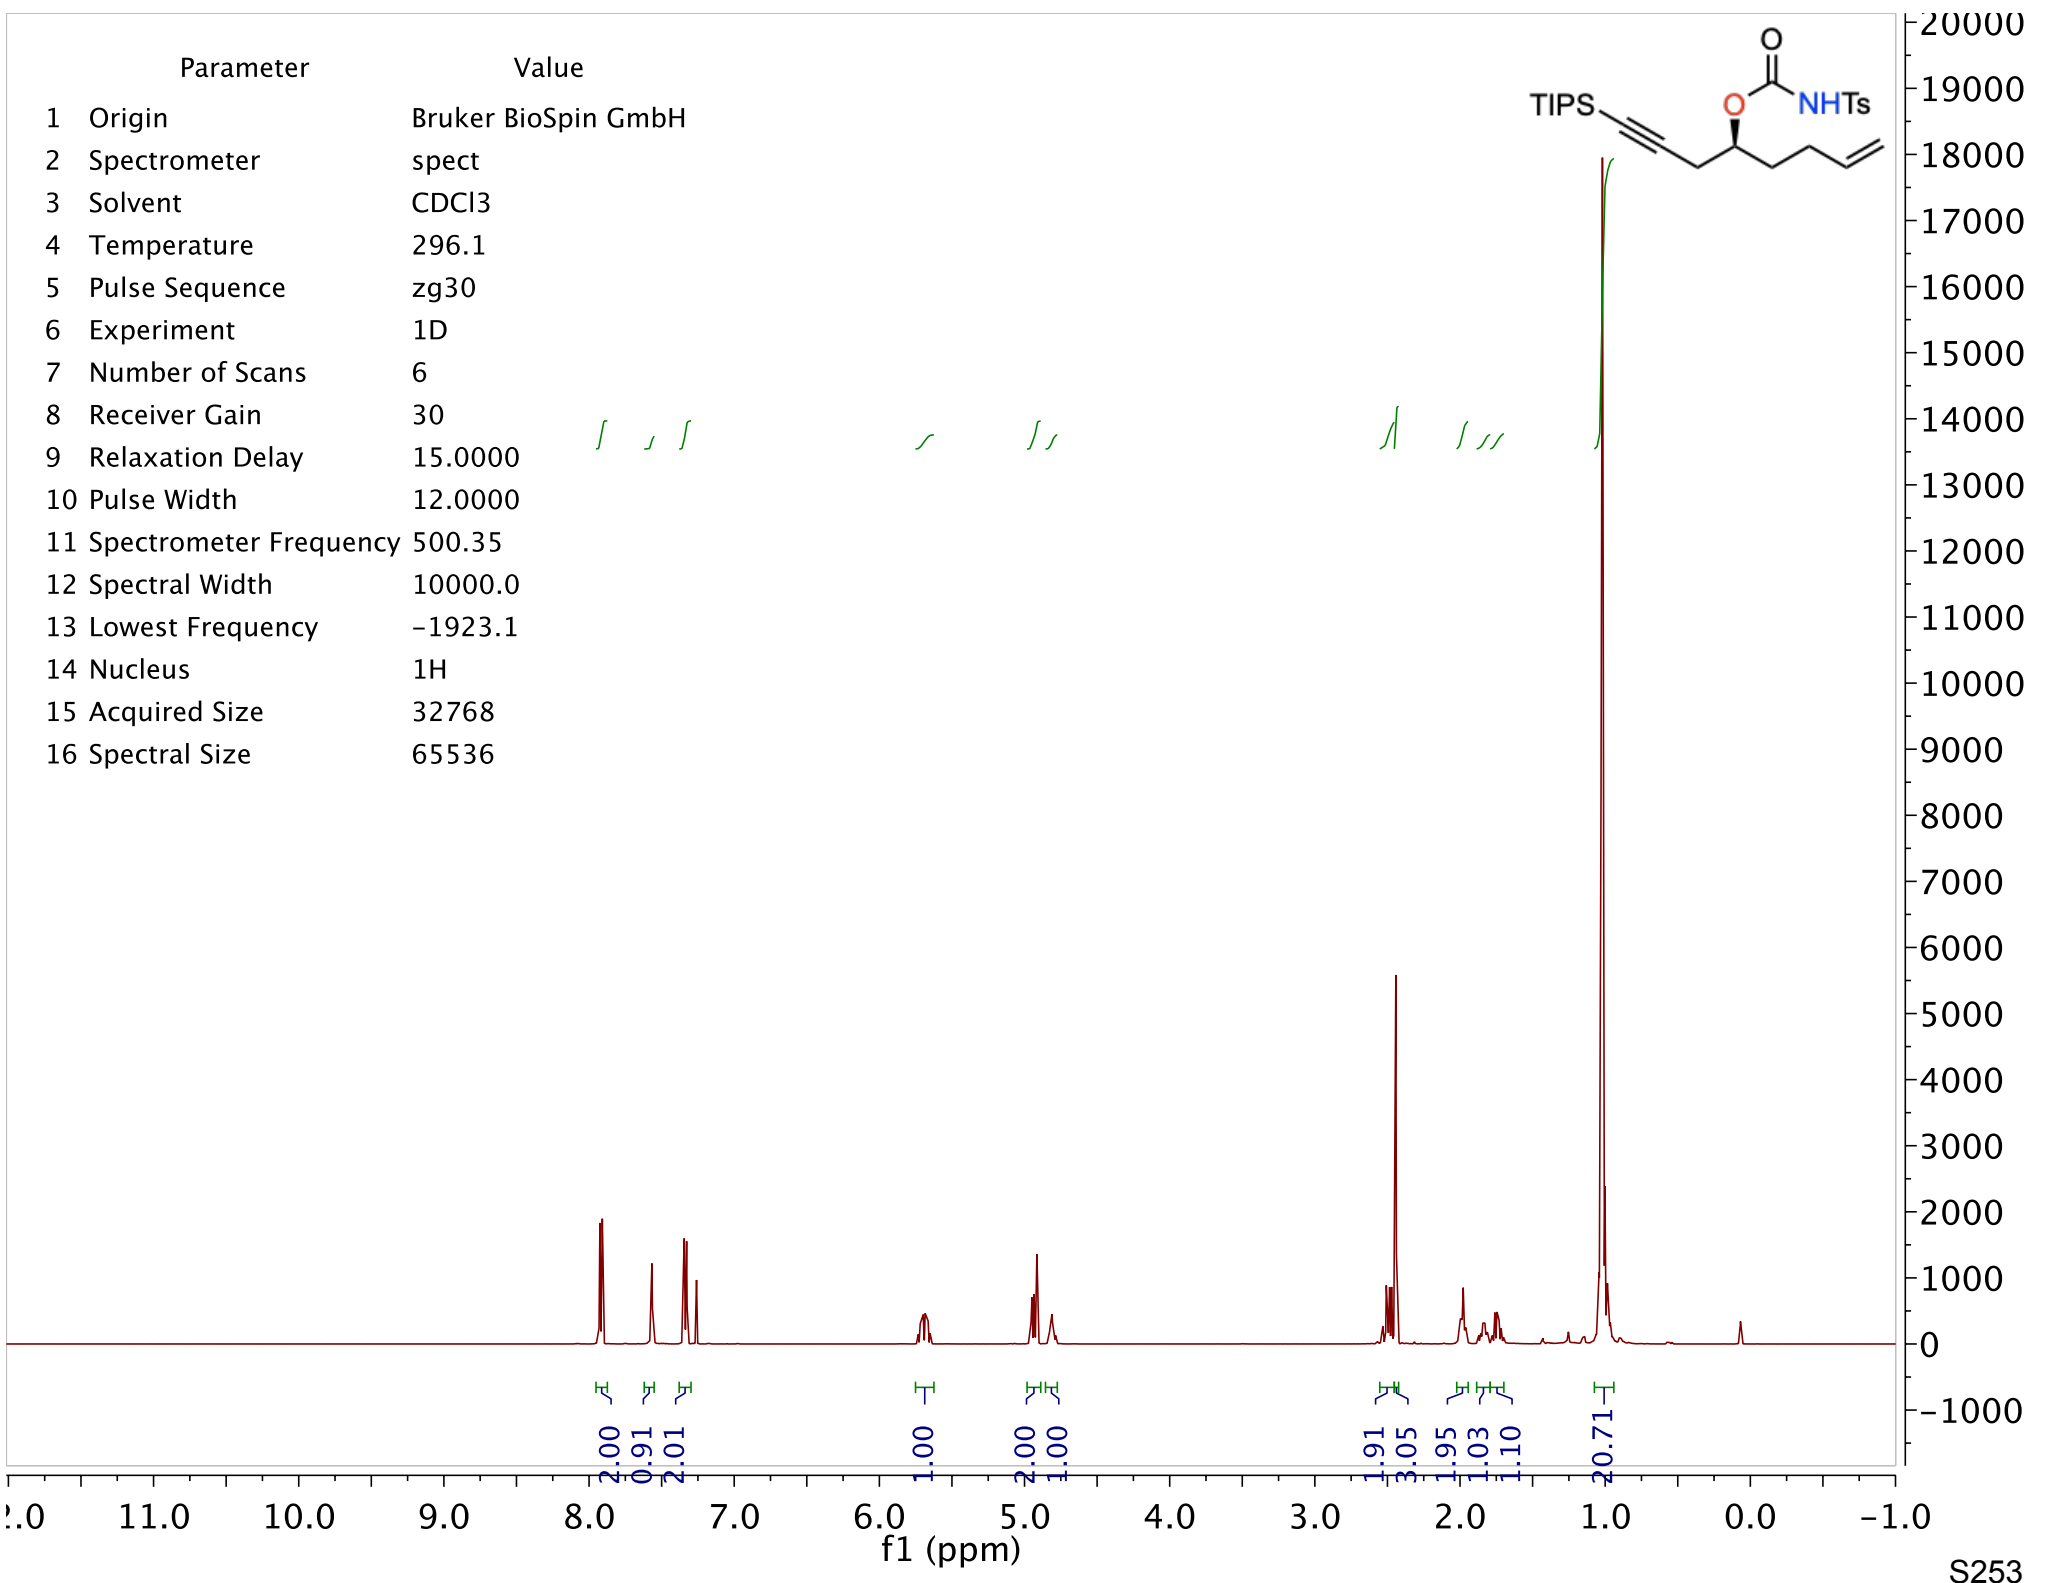

| Parameter                 | Value               |
|---------------------------|---------------------|
| 1 Origin                  | Bruker BioSpin GmbH |
| 2 Spectrometer            | spect               |
| 3 Solvent                 | CDCl3               |
| 4 Temperature             | 296.2               |
| 5 Pulse Sequence          | zgpg30              |
| 6 Experiment              | 1D                  |
| 7 Number of Scans         | 800                 |
| 8 Receiver Gain           | 191                 |
| 9 Relaxation Delay        | 1.0000              |
| 10 Pulse Width            | 10.0000             |
| 11 Spectrometer Frequency | 125.83              |
| 12 Spectral Width         | 31512.6             |
| 13 Lowest Frequency       | -1901.3             |
| 14 Nucleus                | <sup>13</sup> C     |
| 15 Acquired Size          | 32768               |
| 16 Spectral Size          | 65536               |

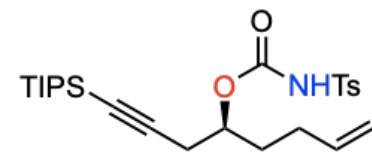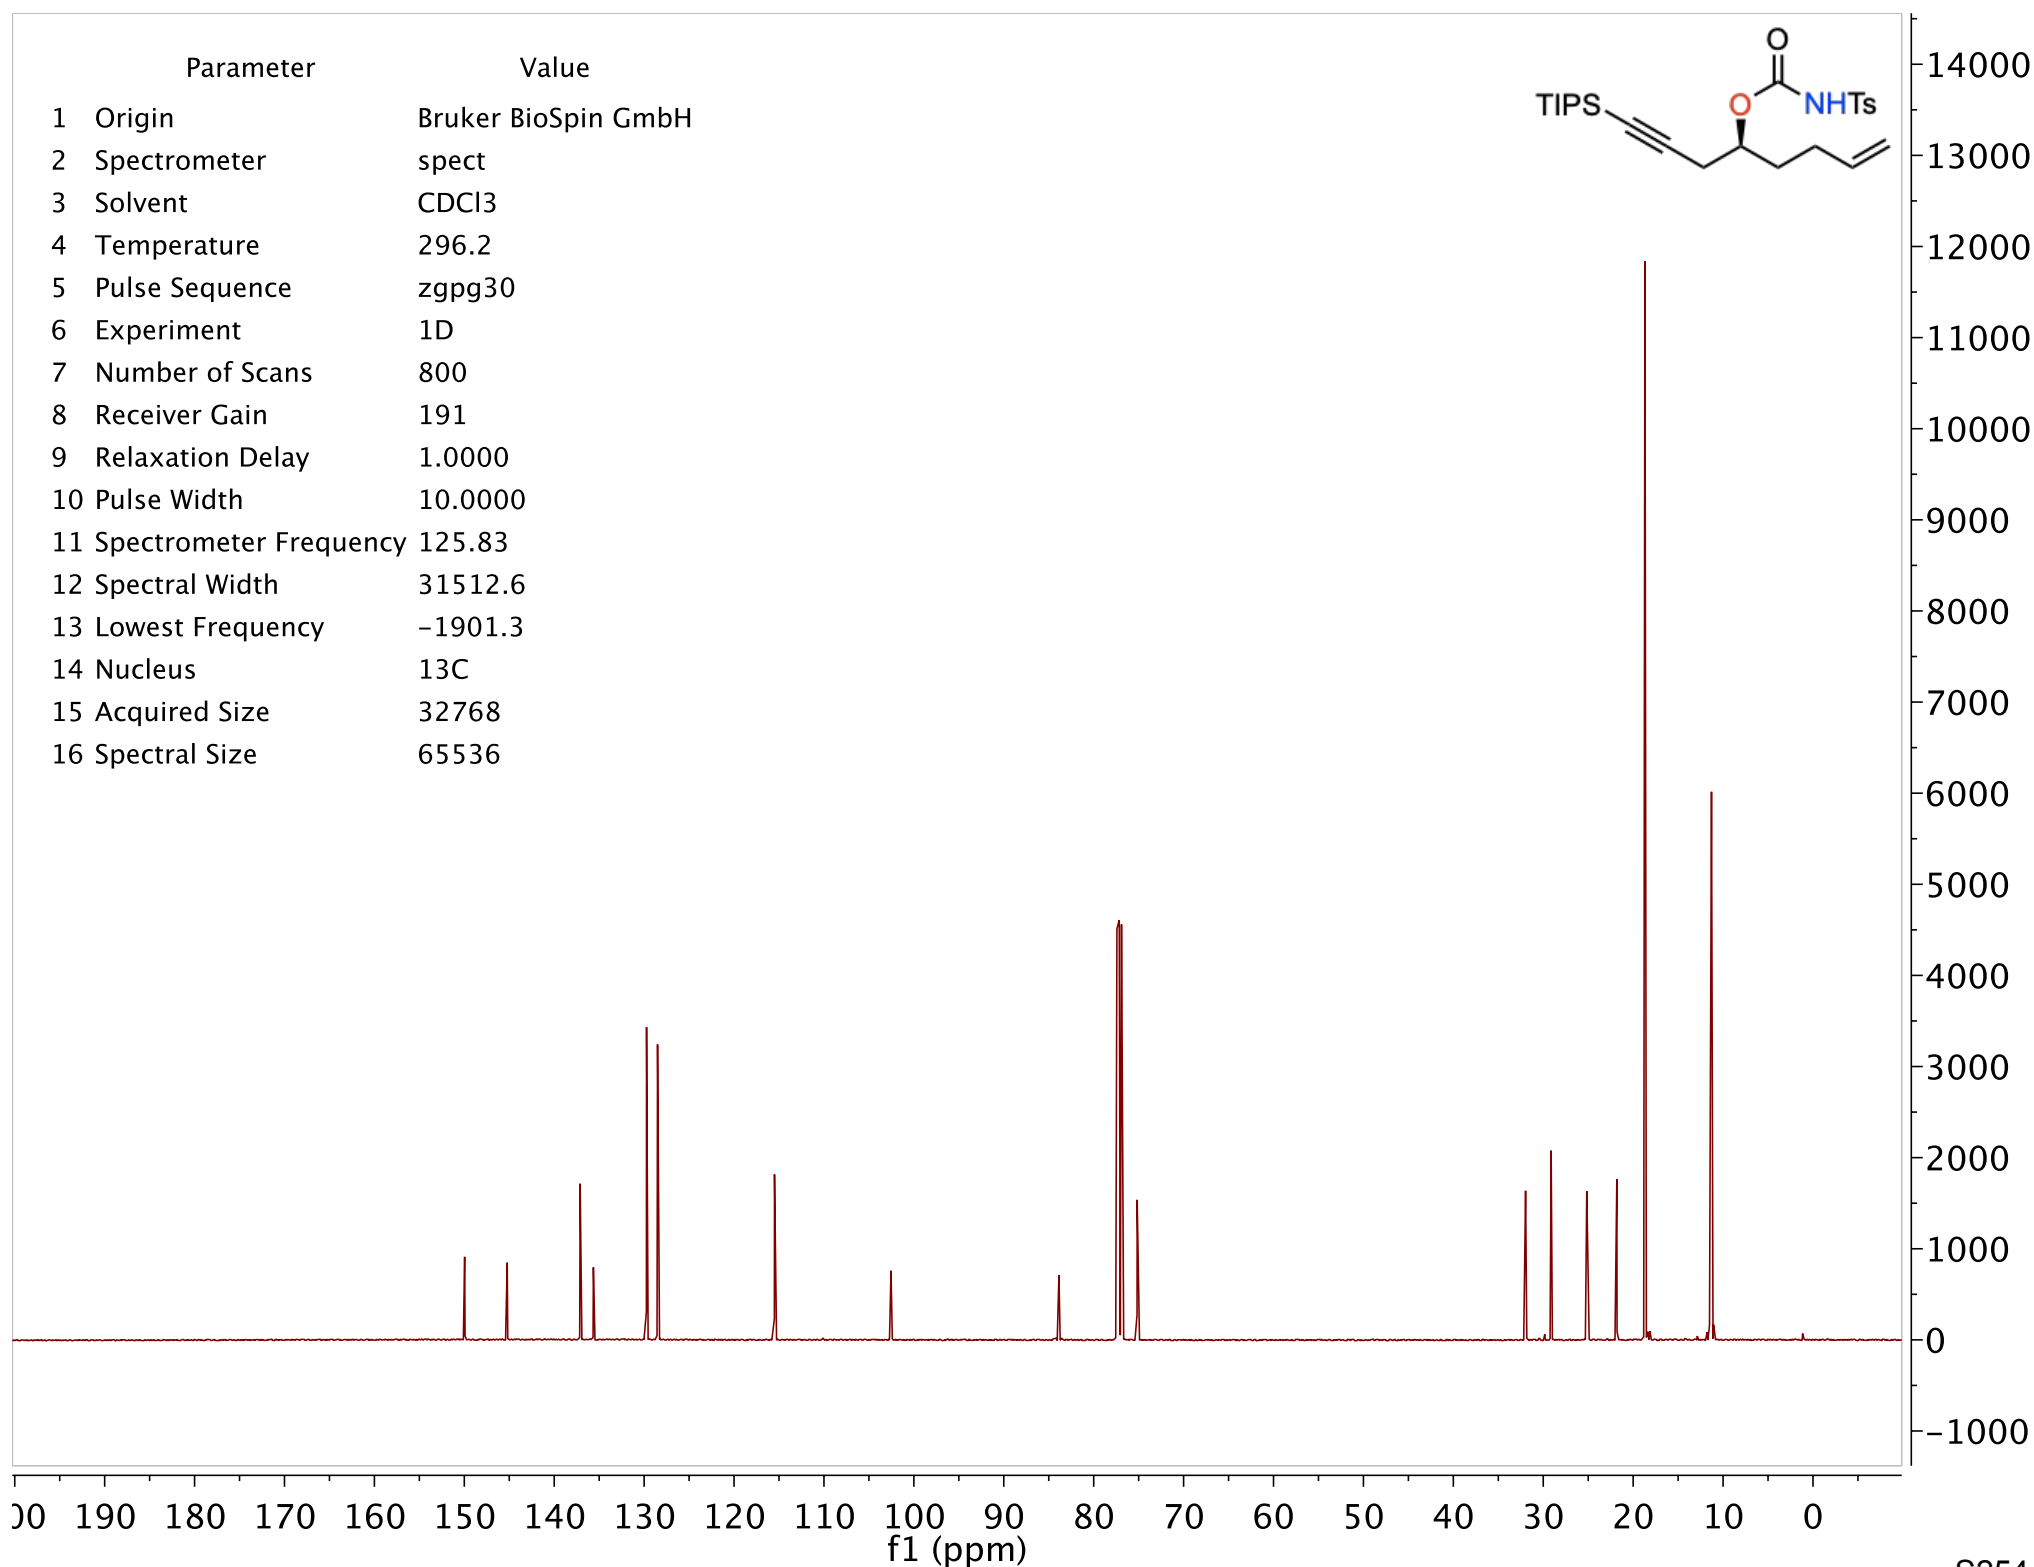



| Parameter                 | Value               |
|---------------------------|---------------------|
| 1 Origin                  | Bruker BioSpin GmbH |
| 2 Spectrometer            | spect               |
| 3 Solvent                 | CDCl3               |
| 4 Temperature             | 298.1               |
| 5 Pulse Sequence          | zg30                |
| 6 Experiment              | 1D                  |
| 7 Number of Scans         | 6                   |
| 8 Receiver Gain           | 30                  |
| 9 Relaxation Delay        | 15.0000             |
| 10 Pulse Width            | 12.0000             |
| 11 Spectrometer Frequency | 500.35              |
| 12 Spectral Width         | 10000.0             |
| 13 Lowest Frequency       | -1920.8             |
| 14 Nucleus                | 1H                  |
| 15 Acquired Size          | 32768               |
| 16 Spectral Size          | 65536               |

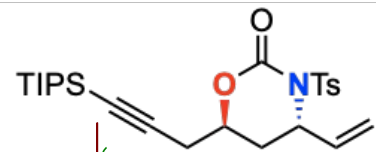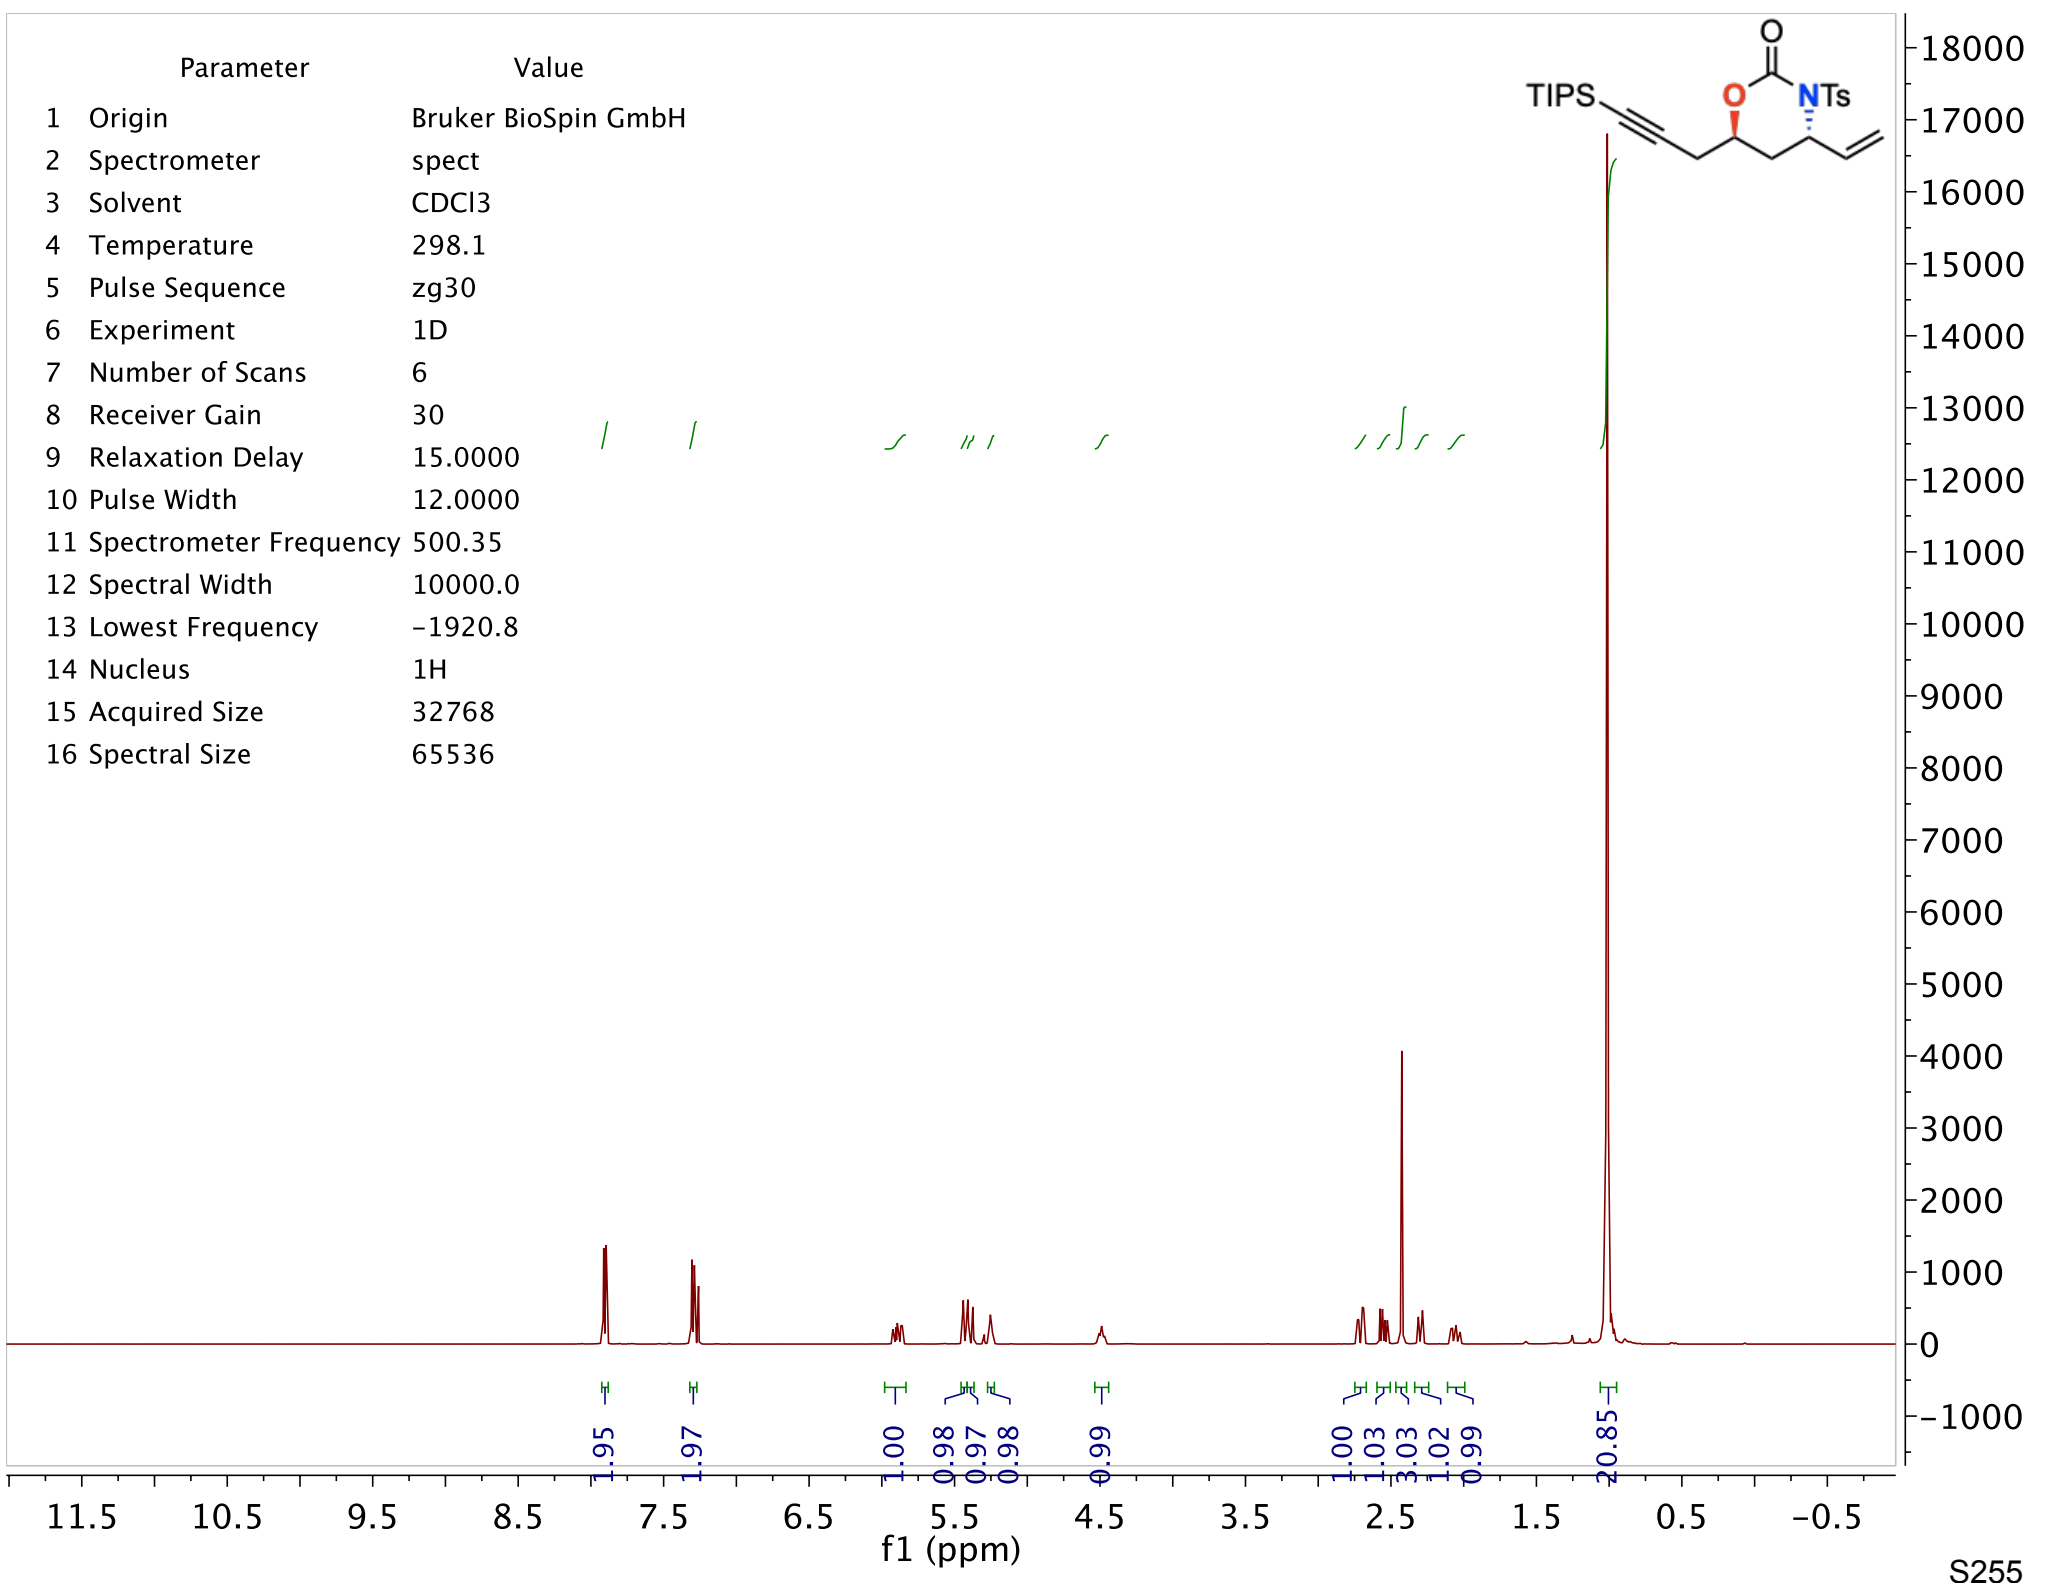

| Parameter                 | Value               |
|---------------------------|---------------------|
| 1 Origin                  | Bruker BioSpin GmbH |
| 2 Spectrometer            | spect               |
| 3 Solvent                 | CDCl3               |
| 4 Temperature             | 298.1               |
| 5 Pulse Sequence          | zgpg30              |
| 6 Experiment              | 1D                  |
| 7 Number of Scans         | 1024                |
| 8 Receiver Gain           | 191                 |
| 9 Relaxation Delay        | 1.0000              |
| 10 Pulse Width            | 10.0000             |
| 11 Spectrometer Frequency | 125.83              |
| 12 Spectral Width         | 31512.6             |
| 13 Lowest Frequency       | -1900.3             |
| 14 Nucleus                | <sup>13</sup> C     |
| 15 Acquired Size          | 32768               |
| 16 Spectral Size          | 65536               |

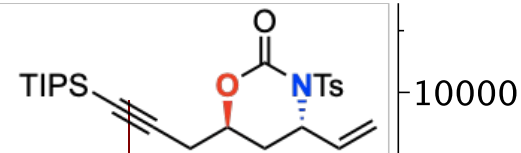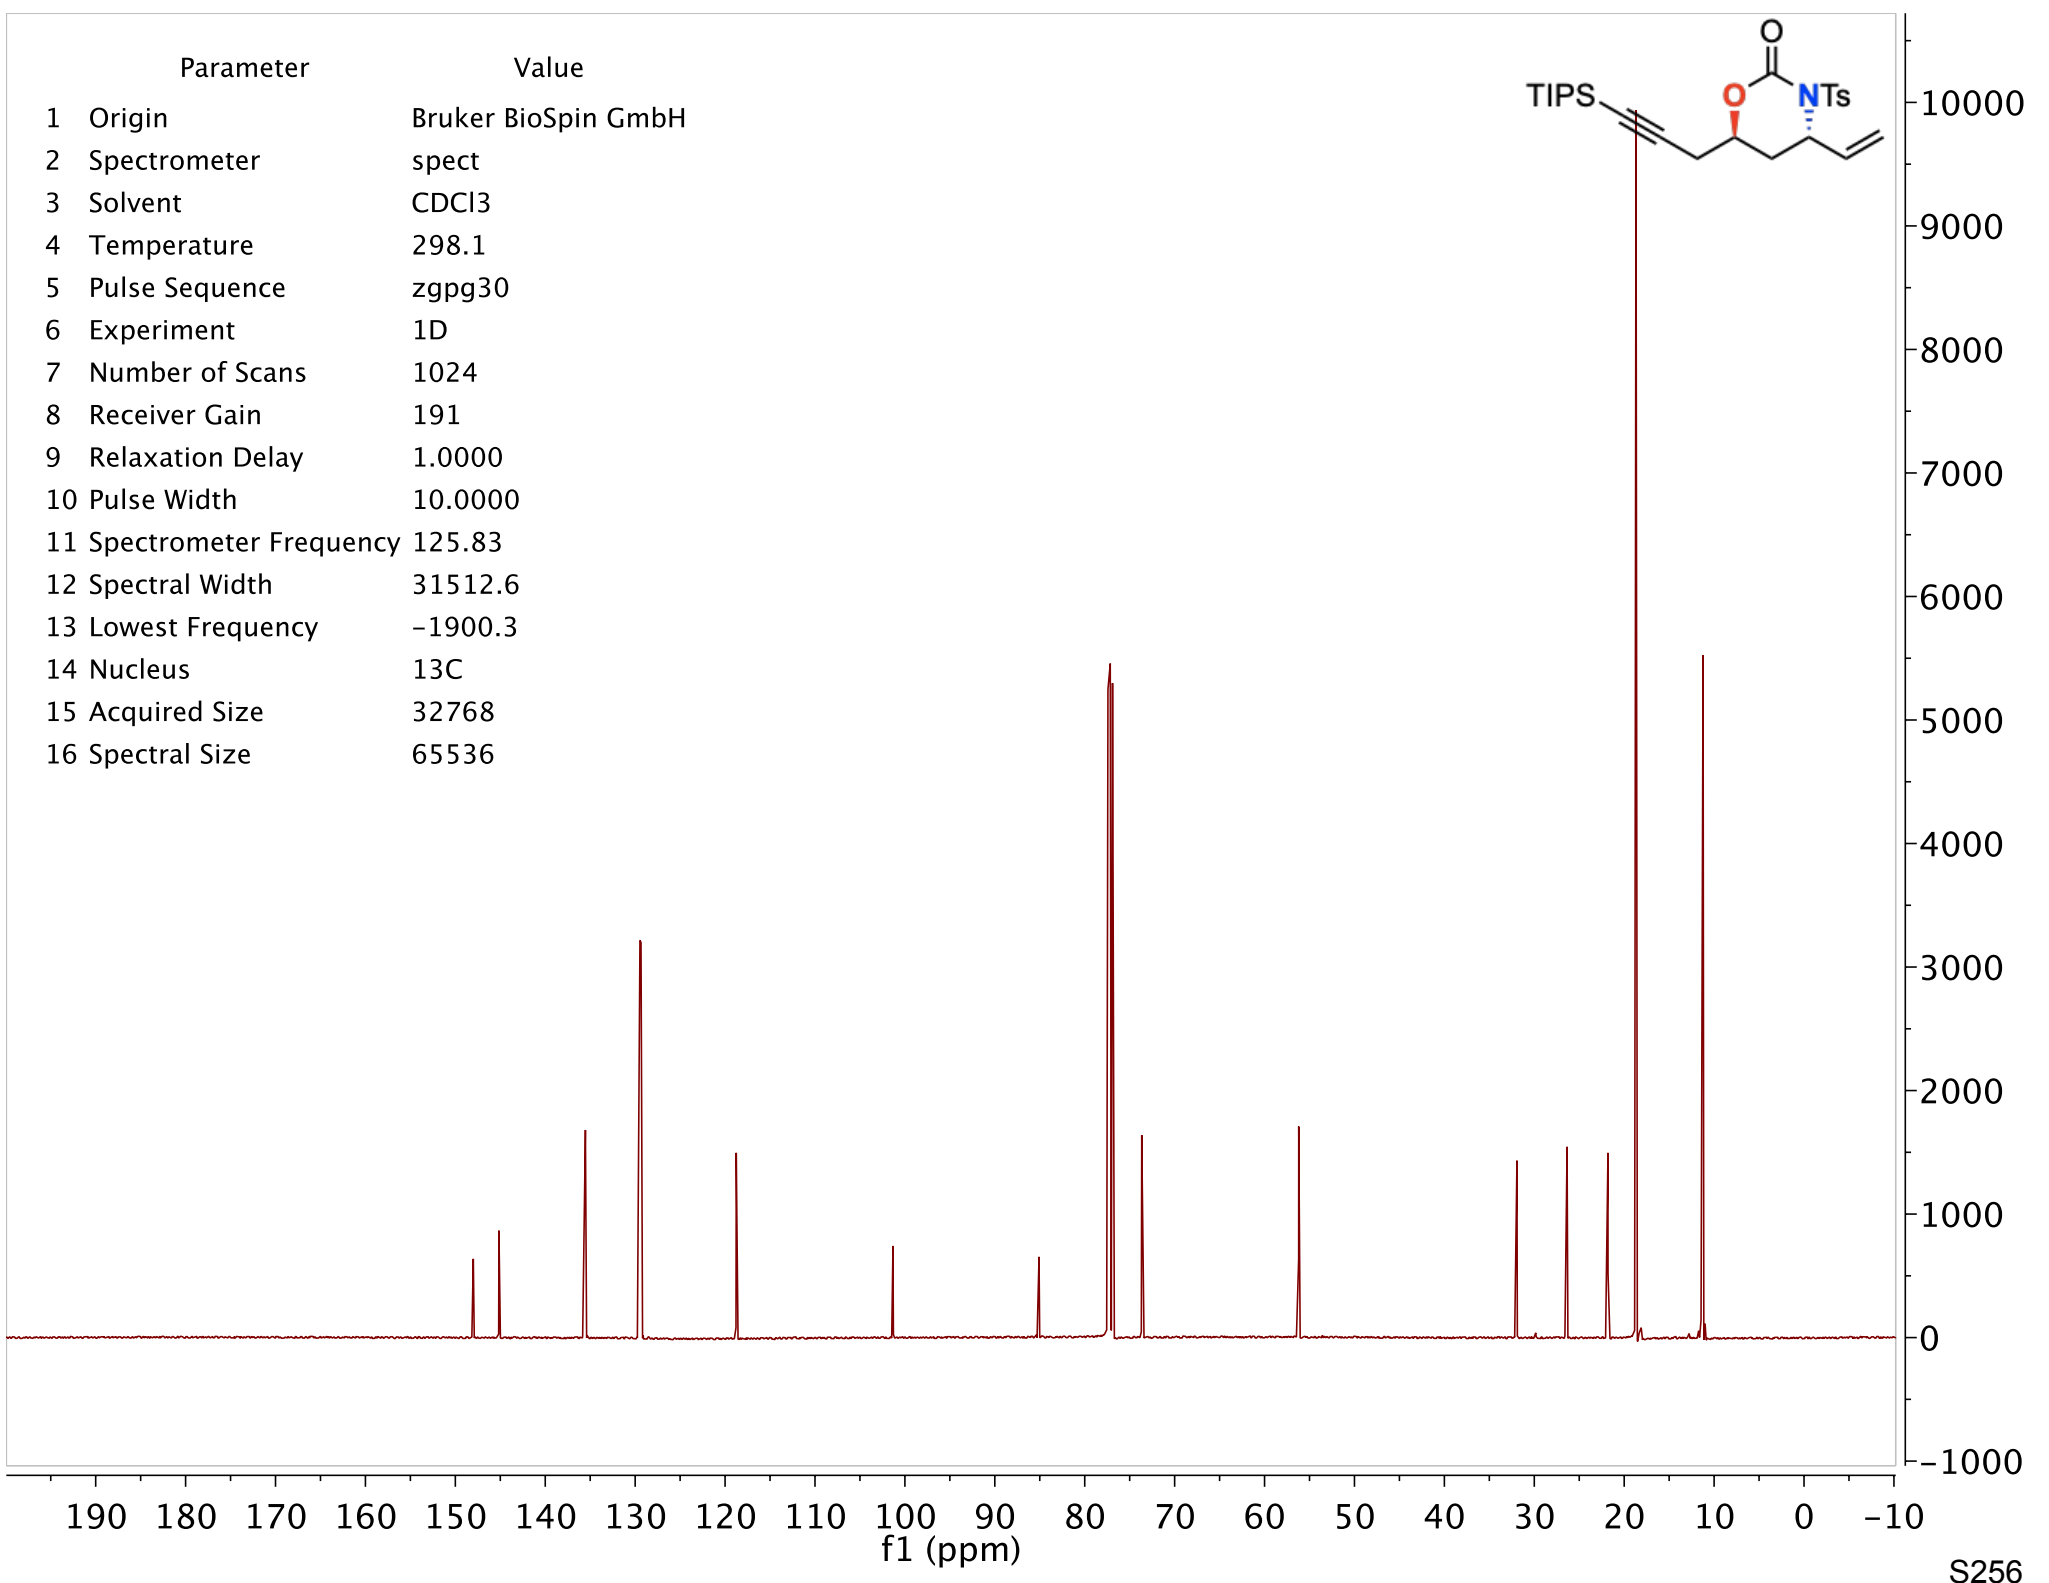

| Parameter                 | Value   |
|---------------------------|---------|
| 1 Origin                  | Varian  |
| 2 Spectrometer            | inova   |
| 3 Solvent                 | CDCl3   |
| 4 Temperature             | 20.0    |
| 5 Pulse Sequence          | s2pul   |
| 6 Experiment              | 1D      |
| 7 Number of Scans         | 6       |
| 8 Receiver Gain           | 26      |
| 9 Relaxation Delay        | 15.0000 |
| 10 Pulse Width            | 7.0000  |
| 11 Spectrometer Frequency | 500.07  |
| 12 Spectral Width         | 8000.0  |
| 13 Lowest Frequency       | -1556.6 |
| 14 Nucleus                | 1H      |
| 15 Acquired Size          | 32768   |
| 16 Spectral Size          | 65536   |

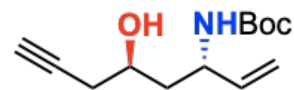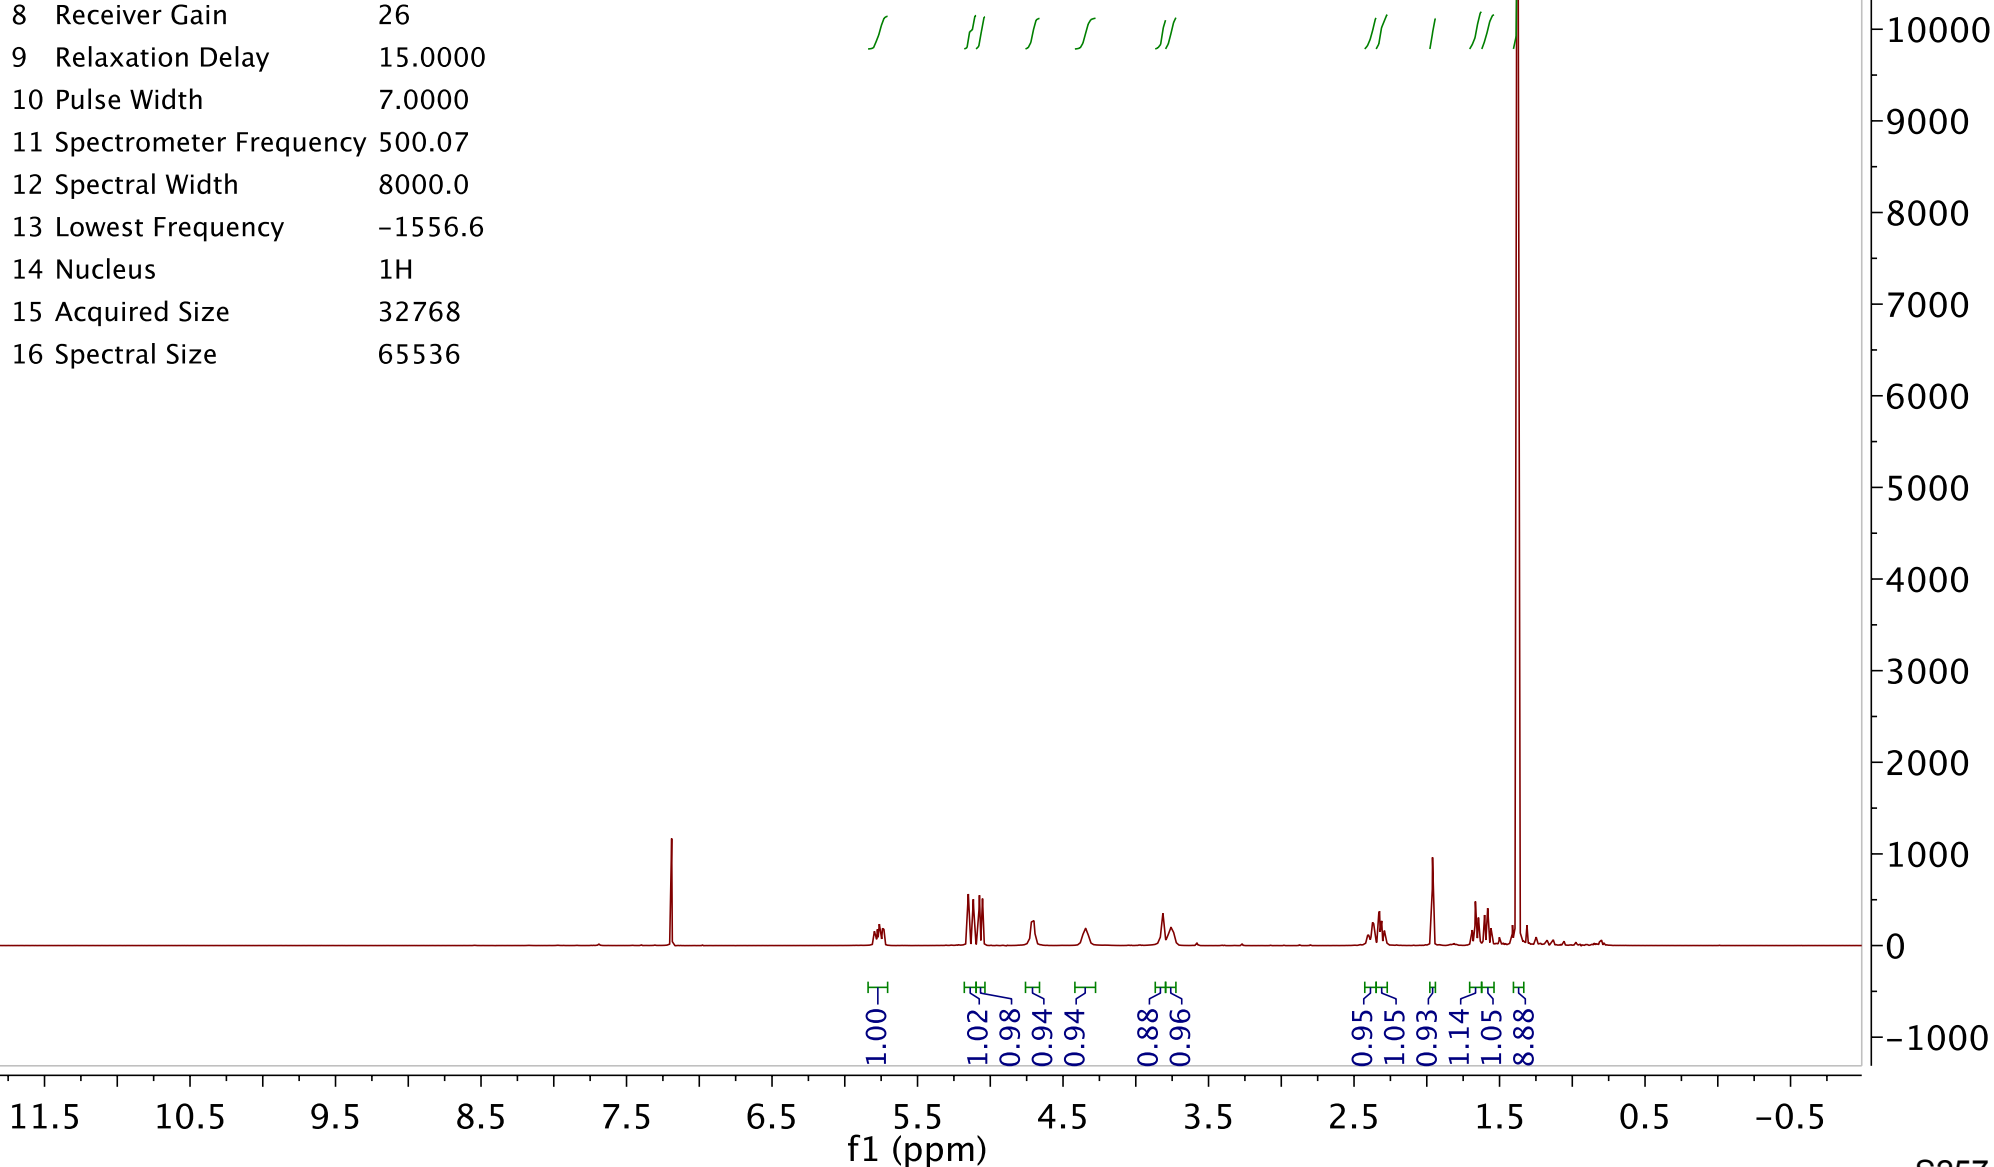

| Parameter                 | Value   |
|---------------------------|---------|
| 1 Origin                  | Varian  |
| 2 Spectrometer            | inova   |
| 3 Solvent                 | CDCl3   |
| 4 Temperature             | 20.0    |
| 5 Pulse Sequence          | s2pul   |
| 6 Experiment              | 1D      |
| 7 Number of Scans         | 1633    |
| 8 Receiver Gain           | 60      |
| 9 Relaxation Delay        | 1.0000  |
| 10 Pulse Width            | 6.0000  |
| 11 Spectrometer Frequency | 125.66  |
| 12 Spectral Width         | 30165.9 |
| 13 Lowest Frequency       | -1274.5 |
| 14 Nucleus                | 13C     |
| 15 Acquired Size          | 32768   |
| 16 Spectral Size          | 65536   |

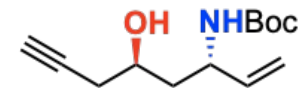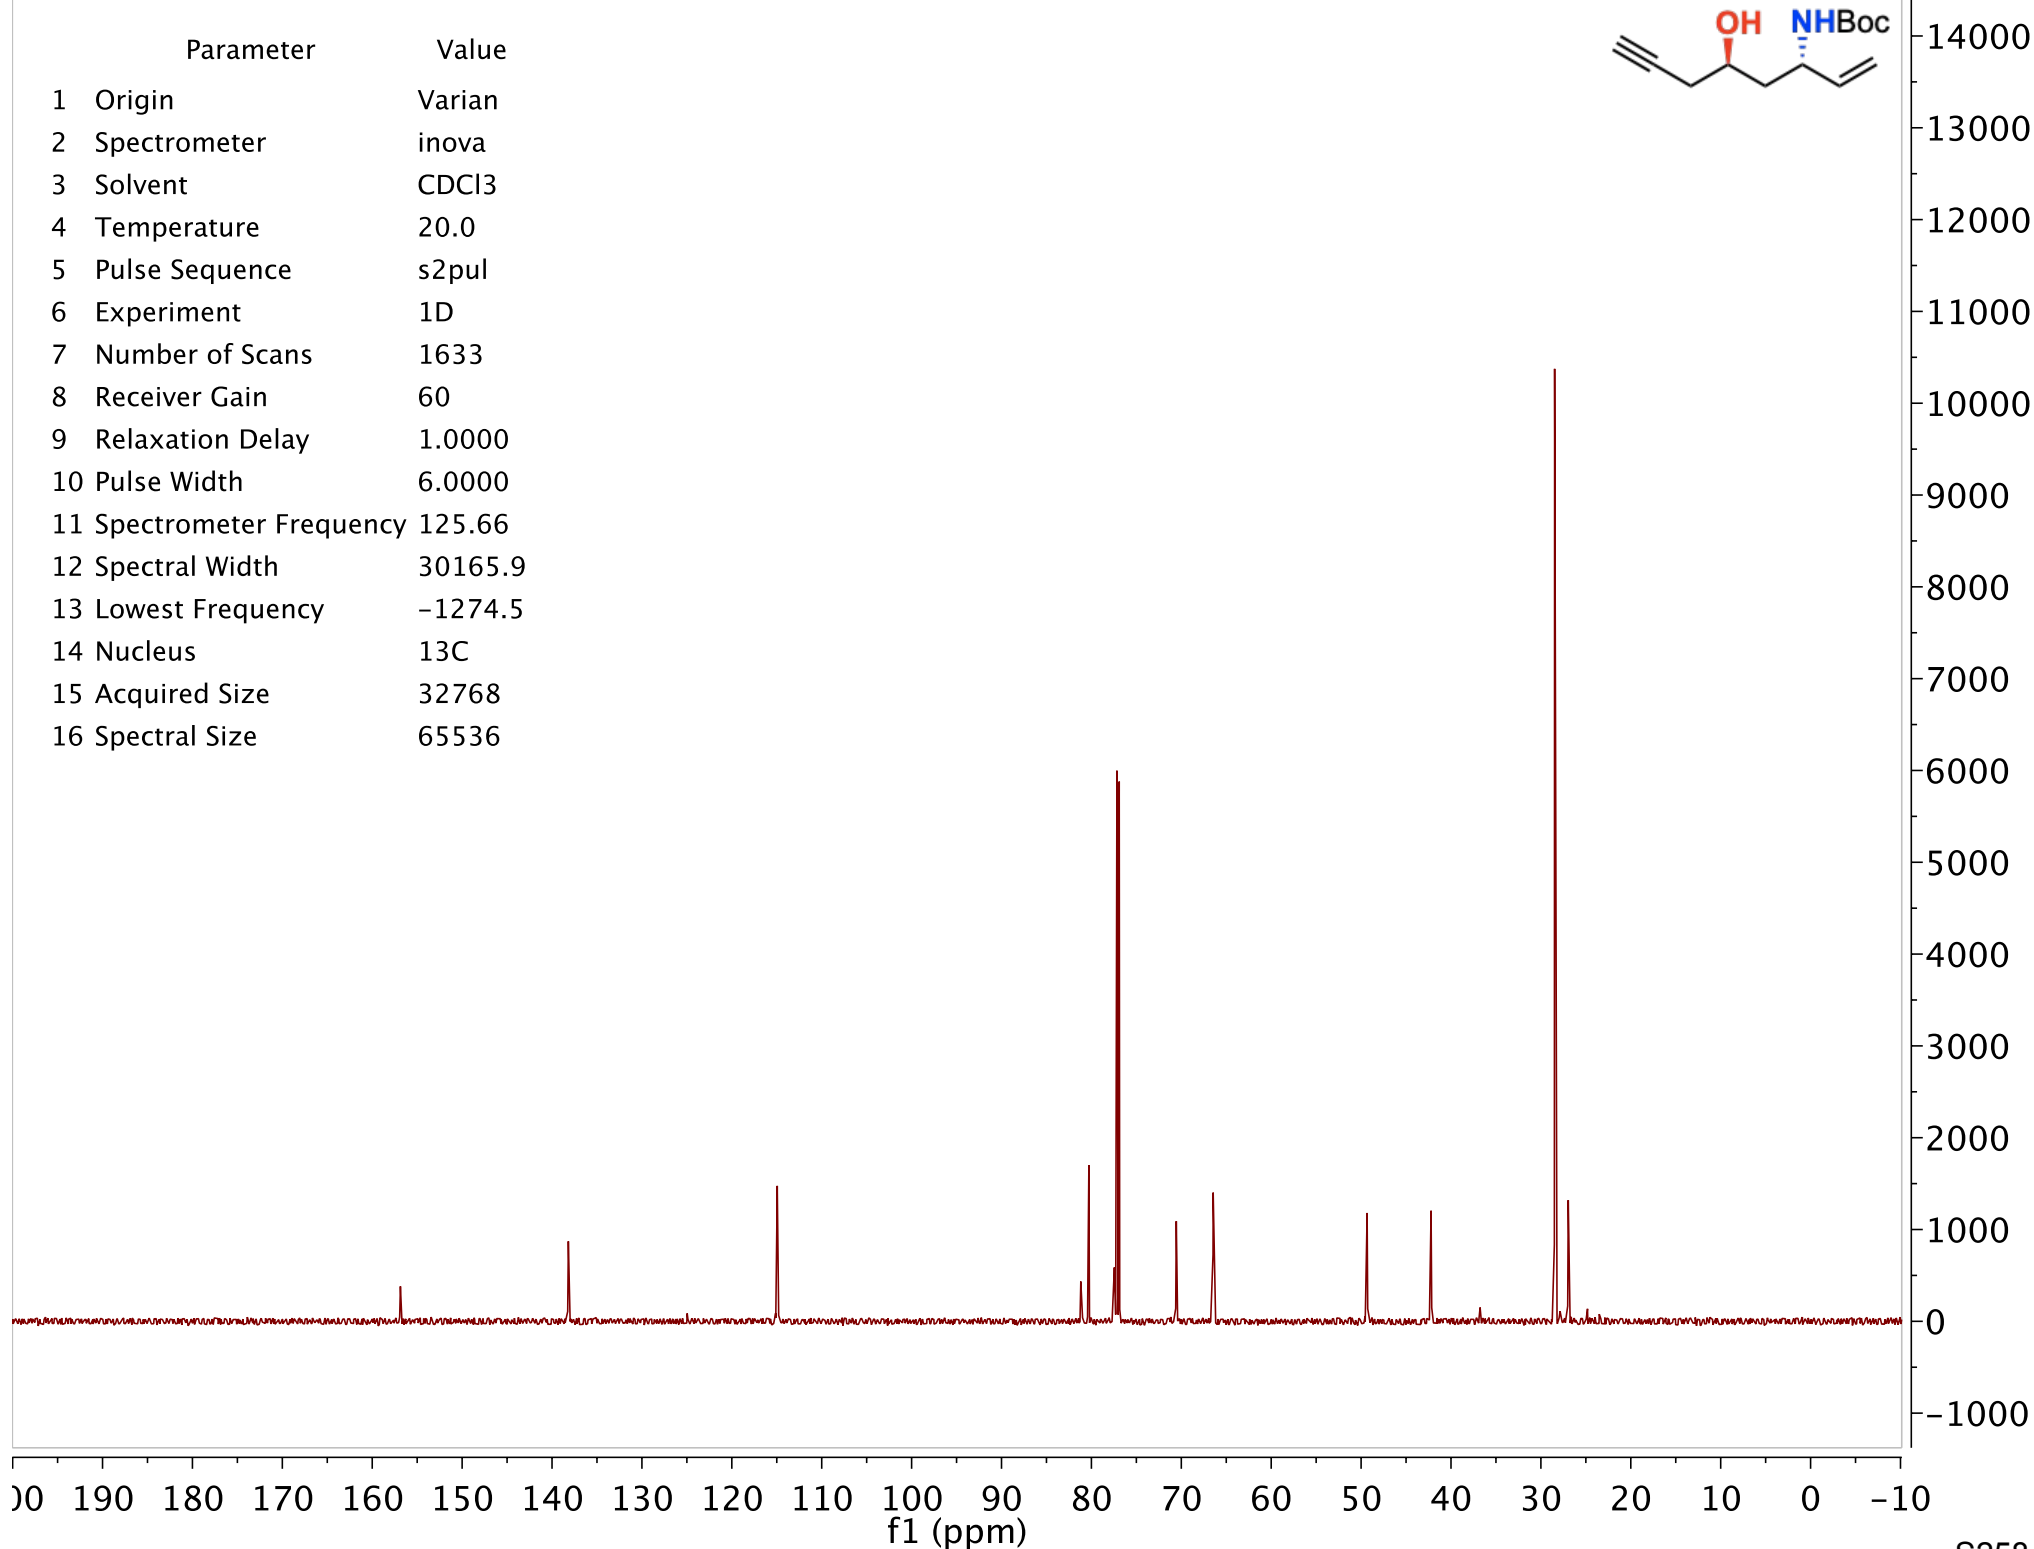

| Parameter                 | Value               |
|---------------------------|---------------------|
| 1 Origin                  | Bruker BioSpin GmbH |
| 2 Spectrometer            | spect               |
| 3 Solvent                 | CDCl3               |
| 4 Temperature             | 298.1               |
| 5 Pulse Sequence          | zg30                |
| 6 Experiment              | 1D                  |
| 7 Number of Scans         | 6                   |
| 8 Receiver Gain           | 30                  |
| 9 Relaxation Delay        | 15.0000             |
| 10 Pulse Width            | 12.0000             |
| 11 Spectrometer Frequency | 500.35              |
| 12 Spectral Width         | 10000.0             |
| 13 Lowest Frequency       | -1921.3             |
| 14 Nucleus                | 1H                  |
| 15 Acquired Size          | 32768               |
| 16 Spectral Size          | 65536               |

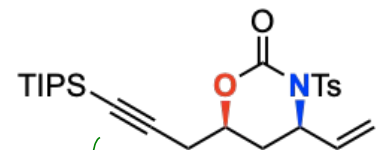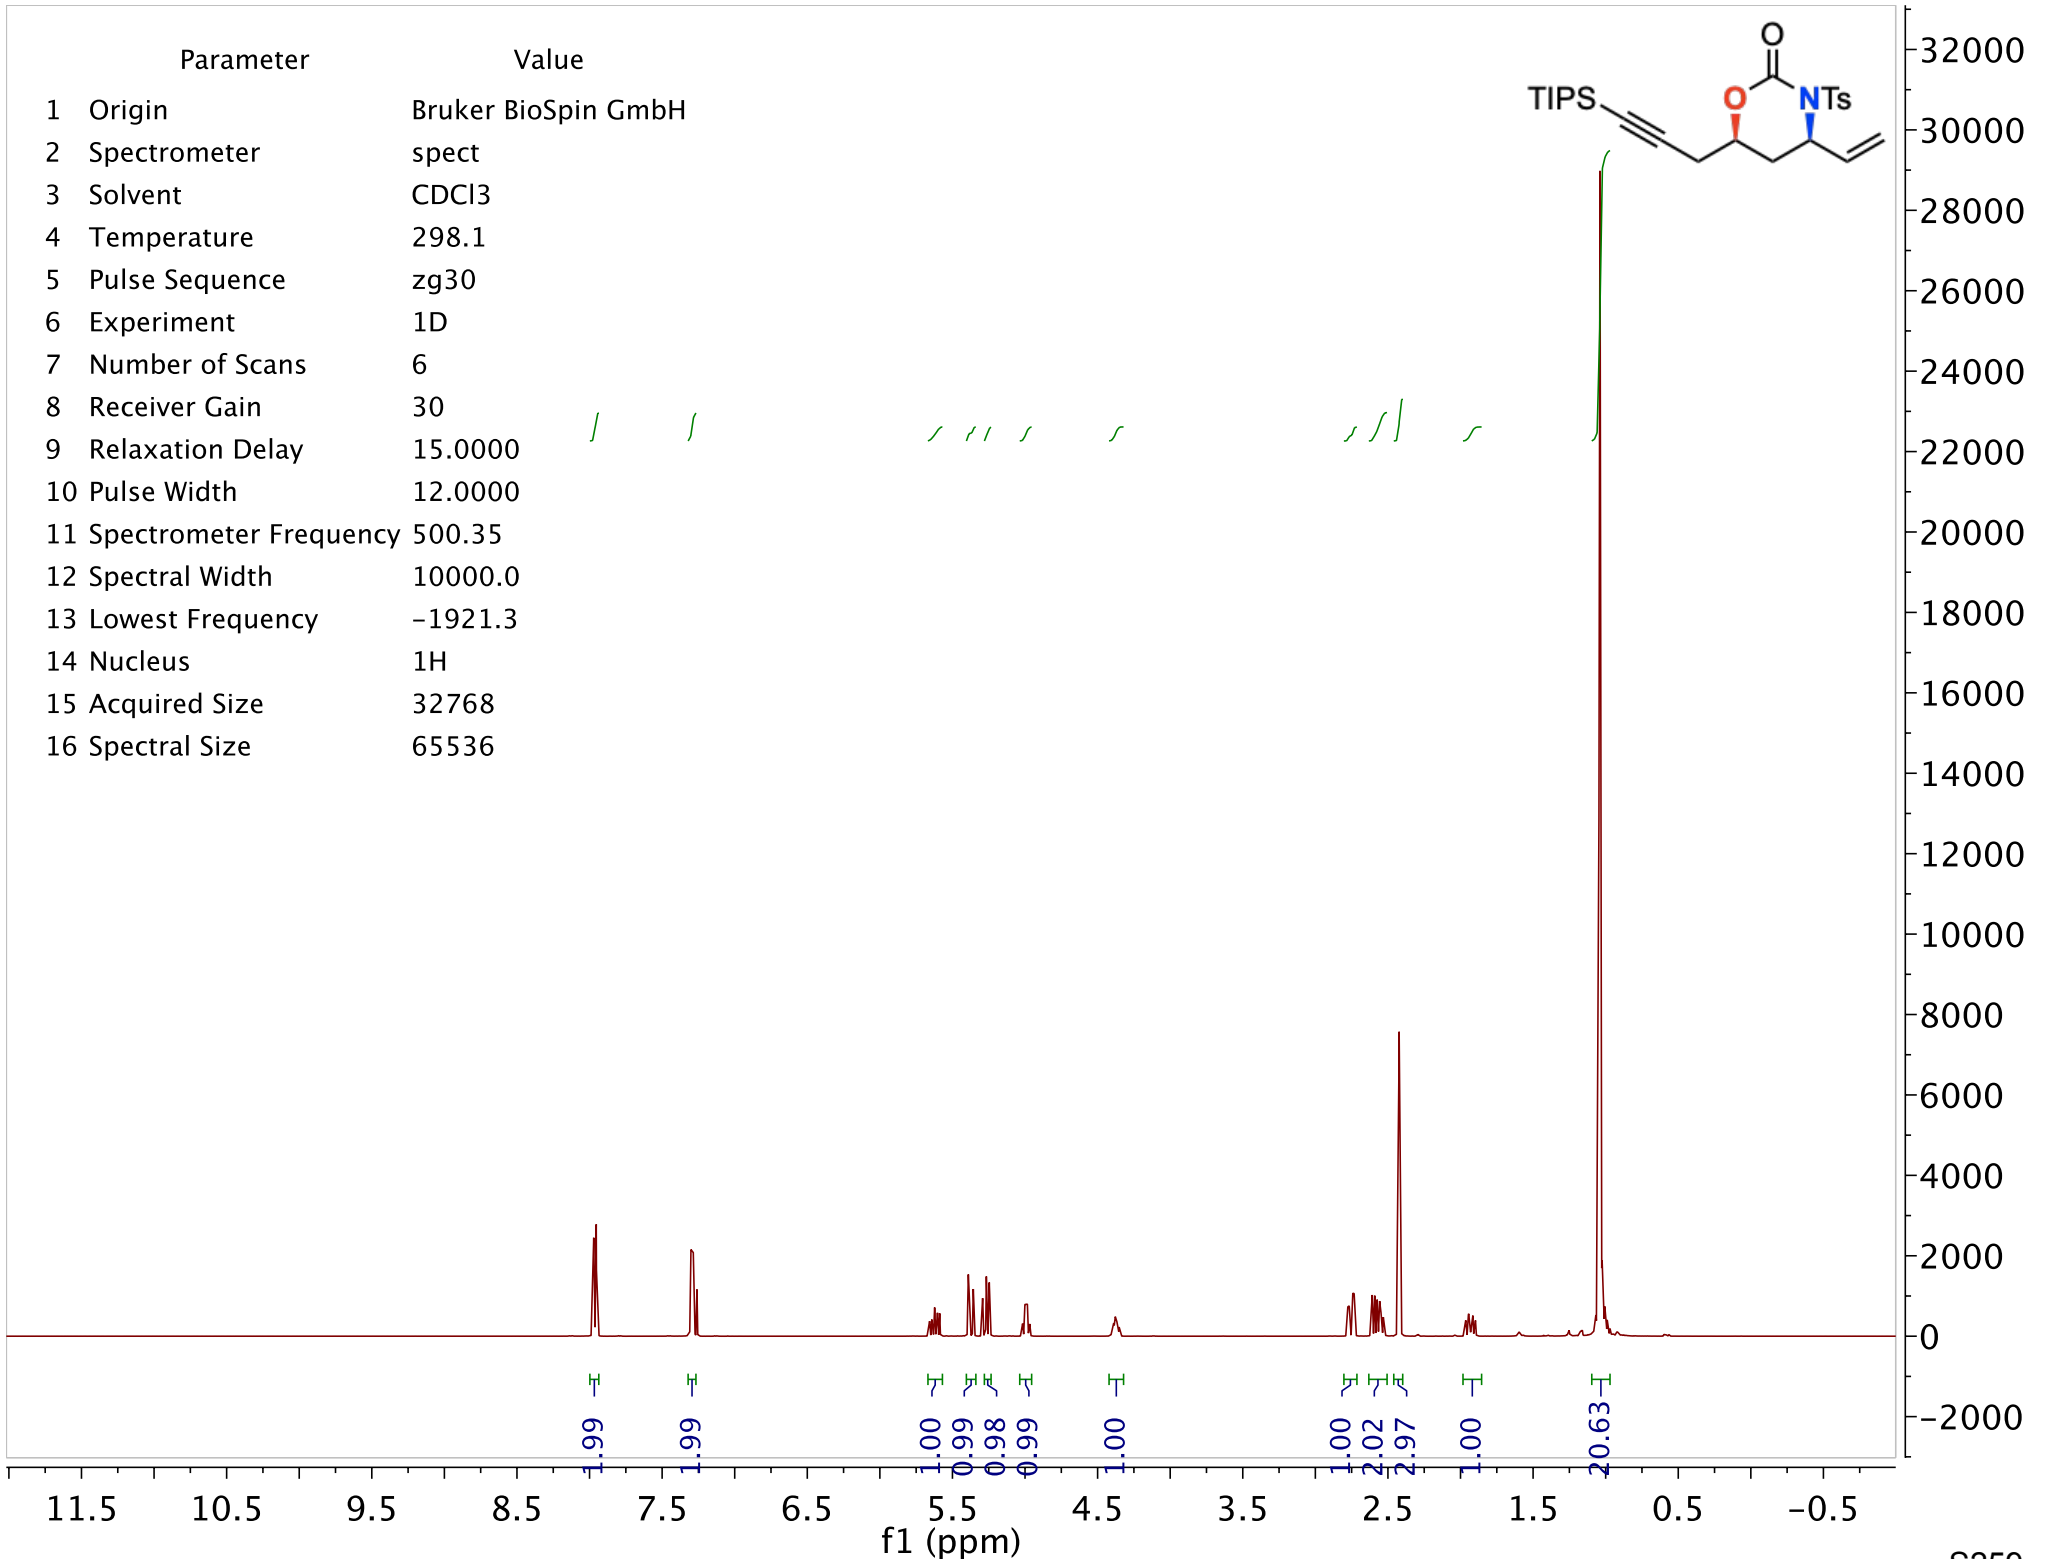

| Parameter                 | Value               |
|---------------------------|---------------------|
| 1 Origin                  | Bruker BioSpin GmbH |
| 2 Spectrometer            | spect               |
| 3 Solvent                 | CDCl3               |
| 4 Temperature             | 298.2               |
| 5 Pulse Sequence          | zgpg30              |
| 6 Experiment              | 1D                  |
| 7 Number of Scans         | 1024                |
| 8 Receiver Gain           | 191                 |
| 9 Relaxation Delay        | 1.0000              |
| 10 Pulse Width            | 10.0000             |
| 11 Spectrometer Frequency | 125.83              |
| 12 Spectral Width         | 31512.6             |
| 13 Lowest Frequency       | -1901.6             |
| 14 Nucleus                | <sup>13</sup> C     |
| 15 Acquired Size          | 32768               |
| 16 Spectral Size          | 65536               |

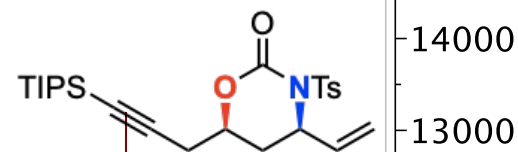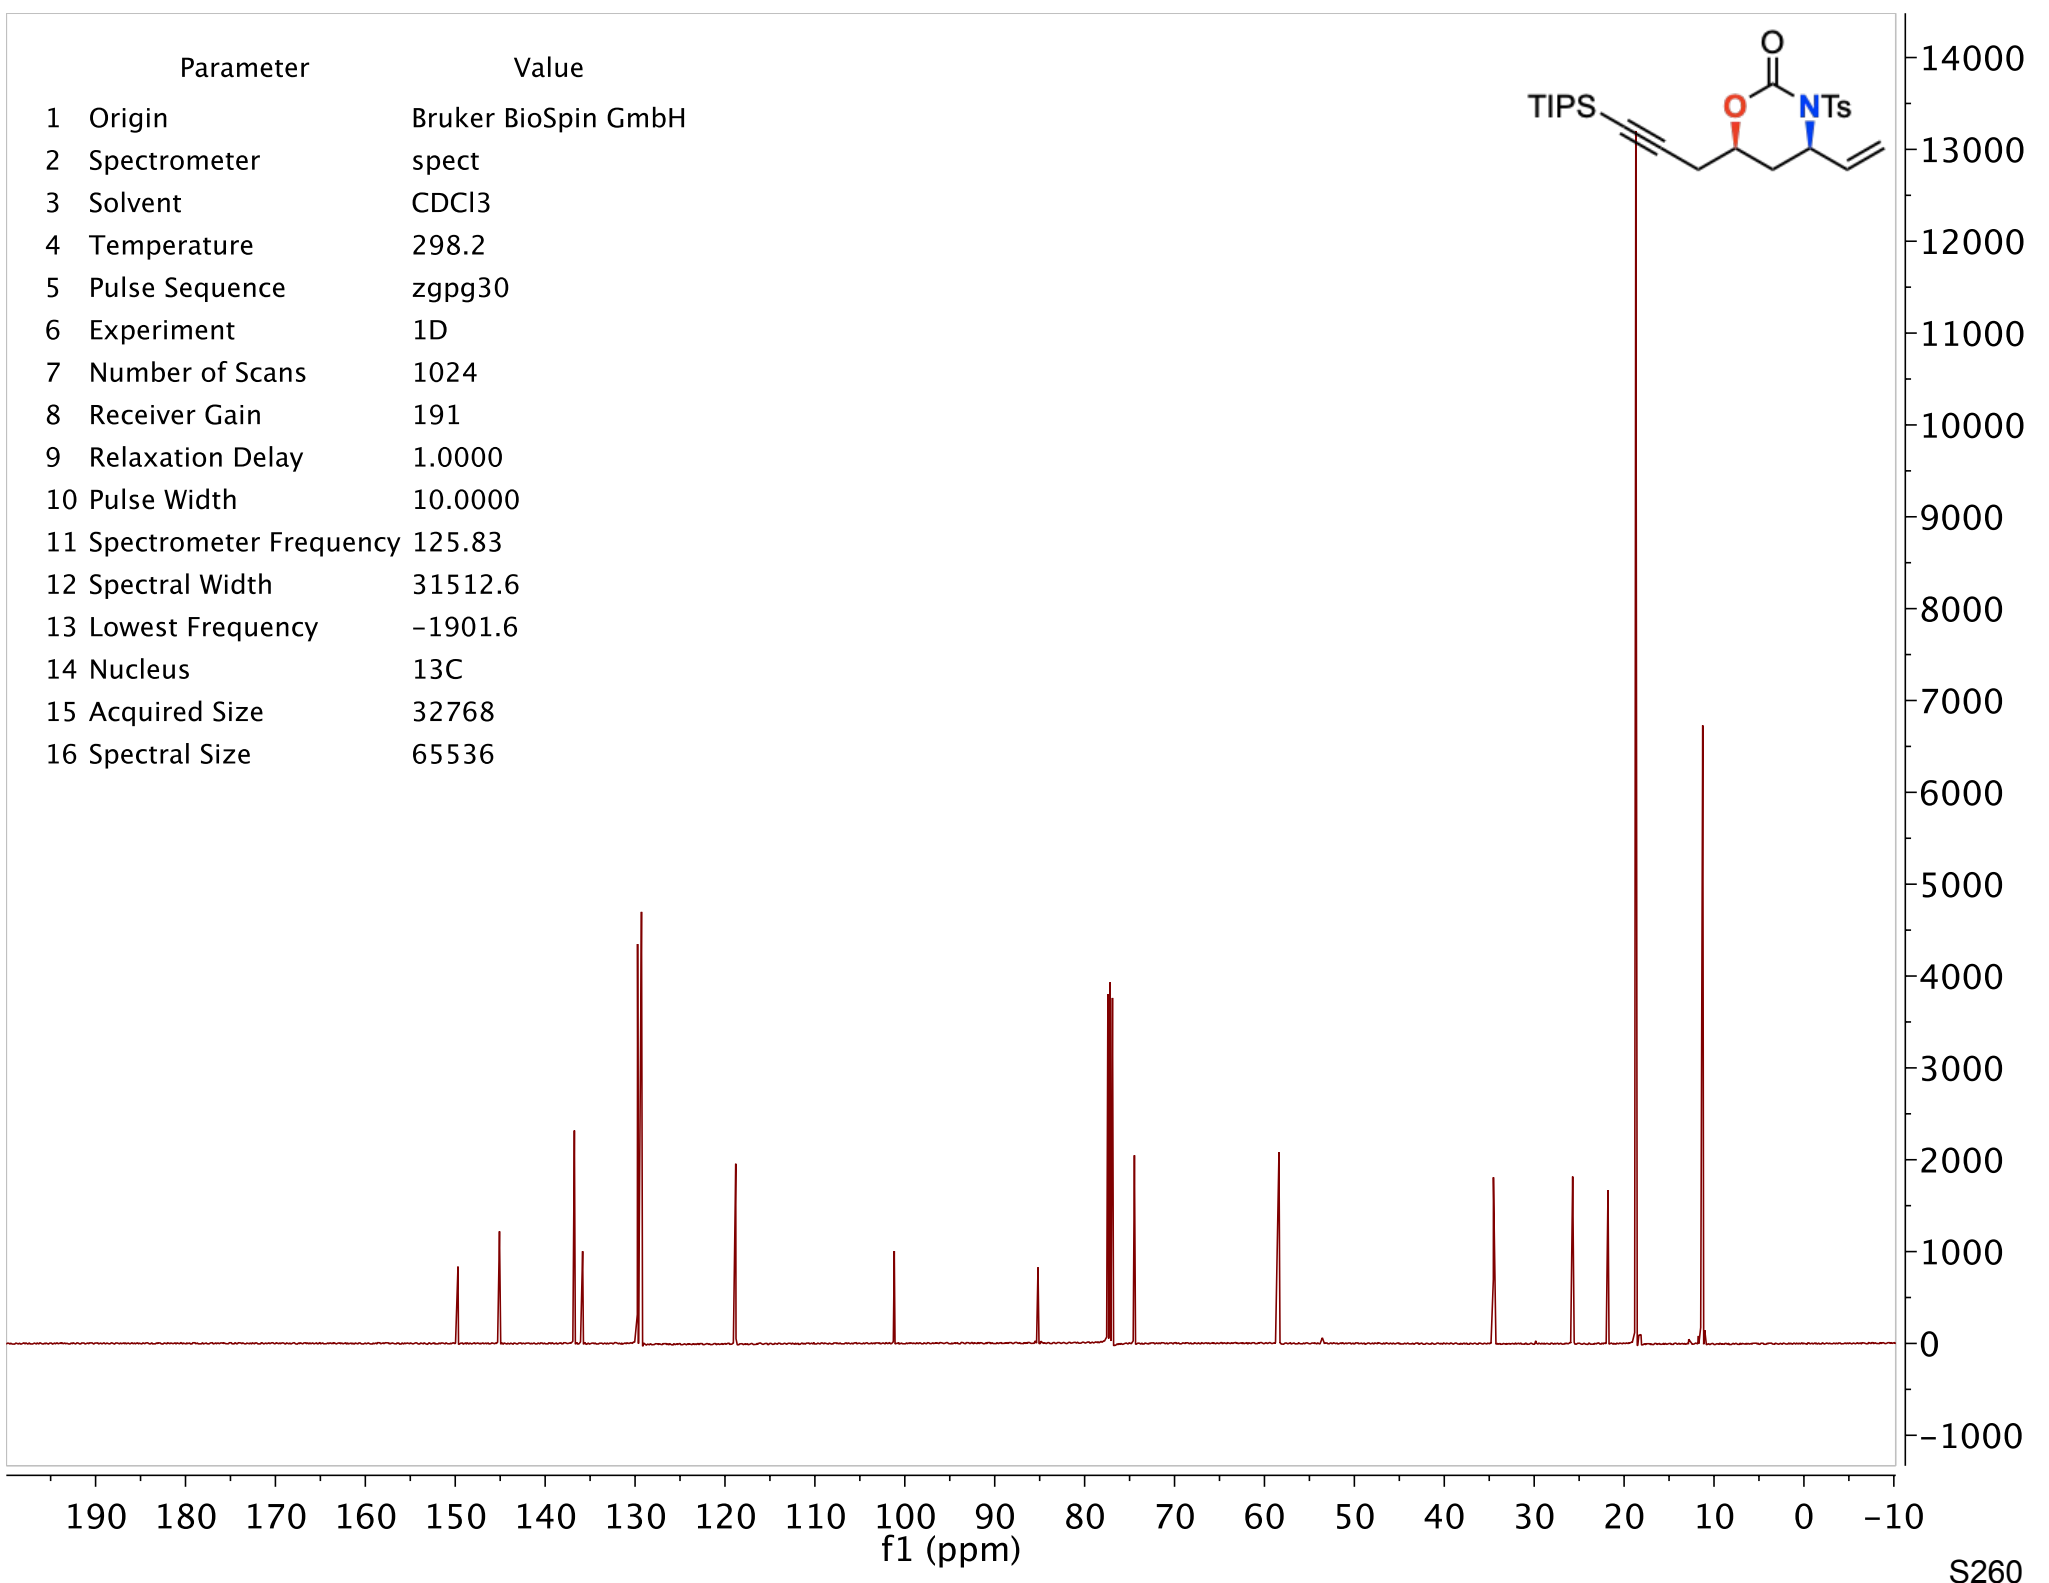

| Parameter                 | Value               |
|---------------------------|---------------------|
| 1 Origin                  | Bruker BioSpin GmbH |
| 2 Spectrometer            | spect               |
| 3 Solvent                 | CDCl3               |
| 4 Temperature             | 298.1               |
| 5 Pulse Sequence          | zg30                |
| 6 Experiment              | 1D                  |
| 7 Number of Scans         | 6                   |
| 8 Receiver Gain           | 30                  |
| 9 Relaxation Delay        | 15.0000             |
| 10 Pulse Width            | 12.0000             |
| 11 Spectrometer Frequency | 500.35              |
| 12 Spectral Width         | 10000.0             |
| 13 Lowest Frequency       | -1921.3             |
| 14 Nucleus                | 1H                  |
| 15 Acquired Size          | 32768               |
| 16 Spectral Size          | 65536               |

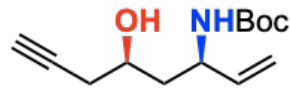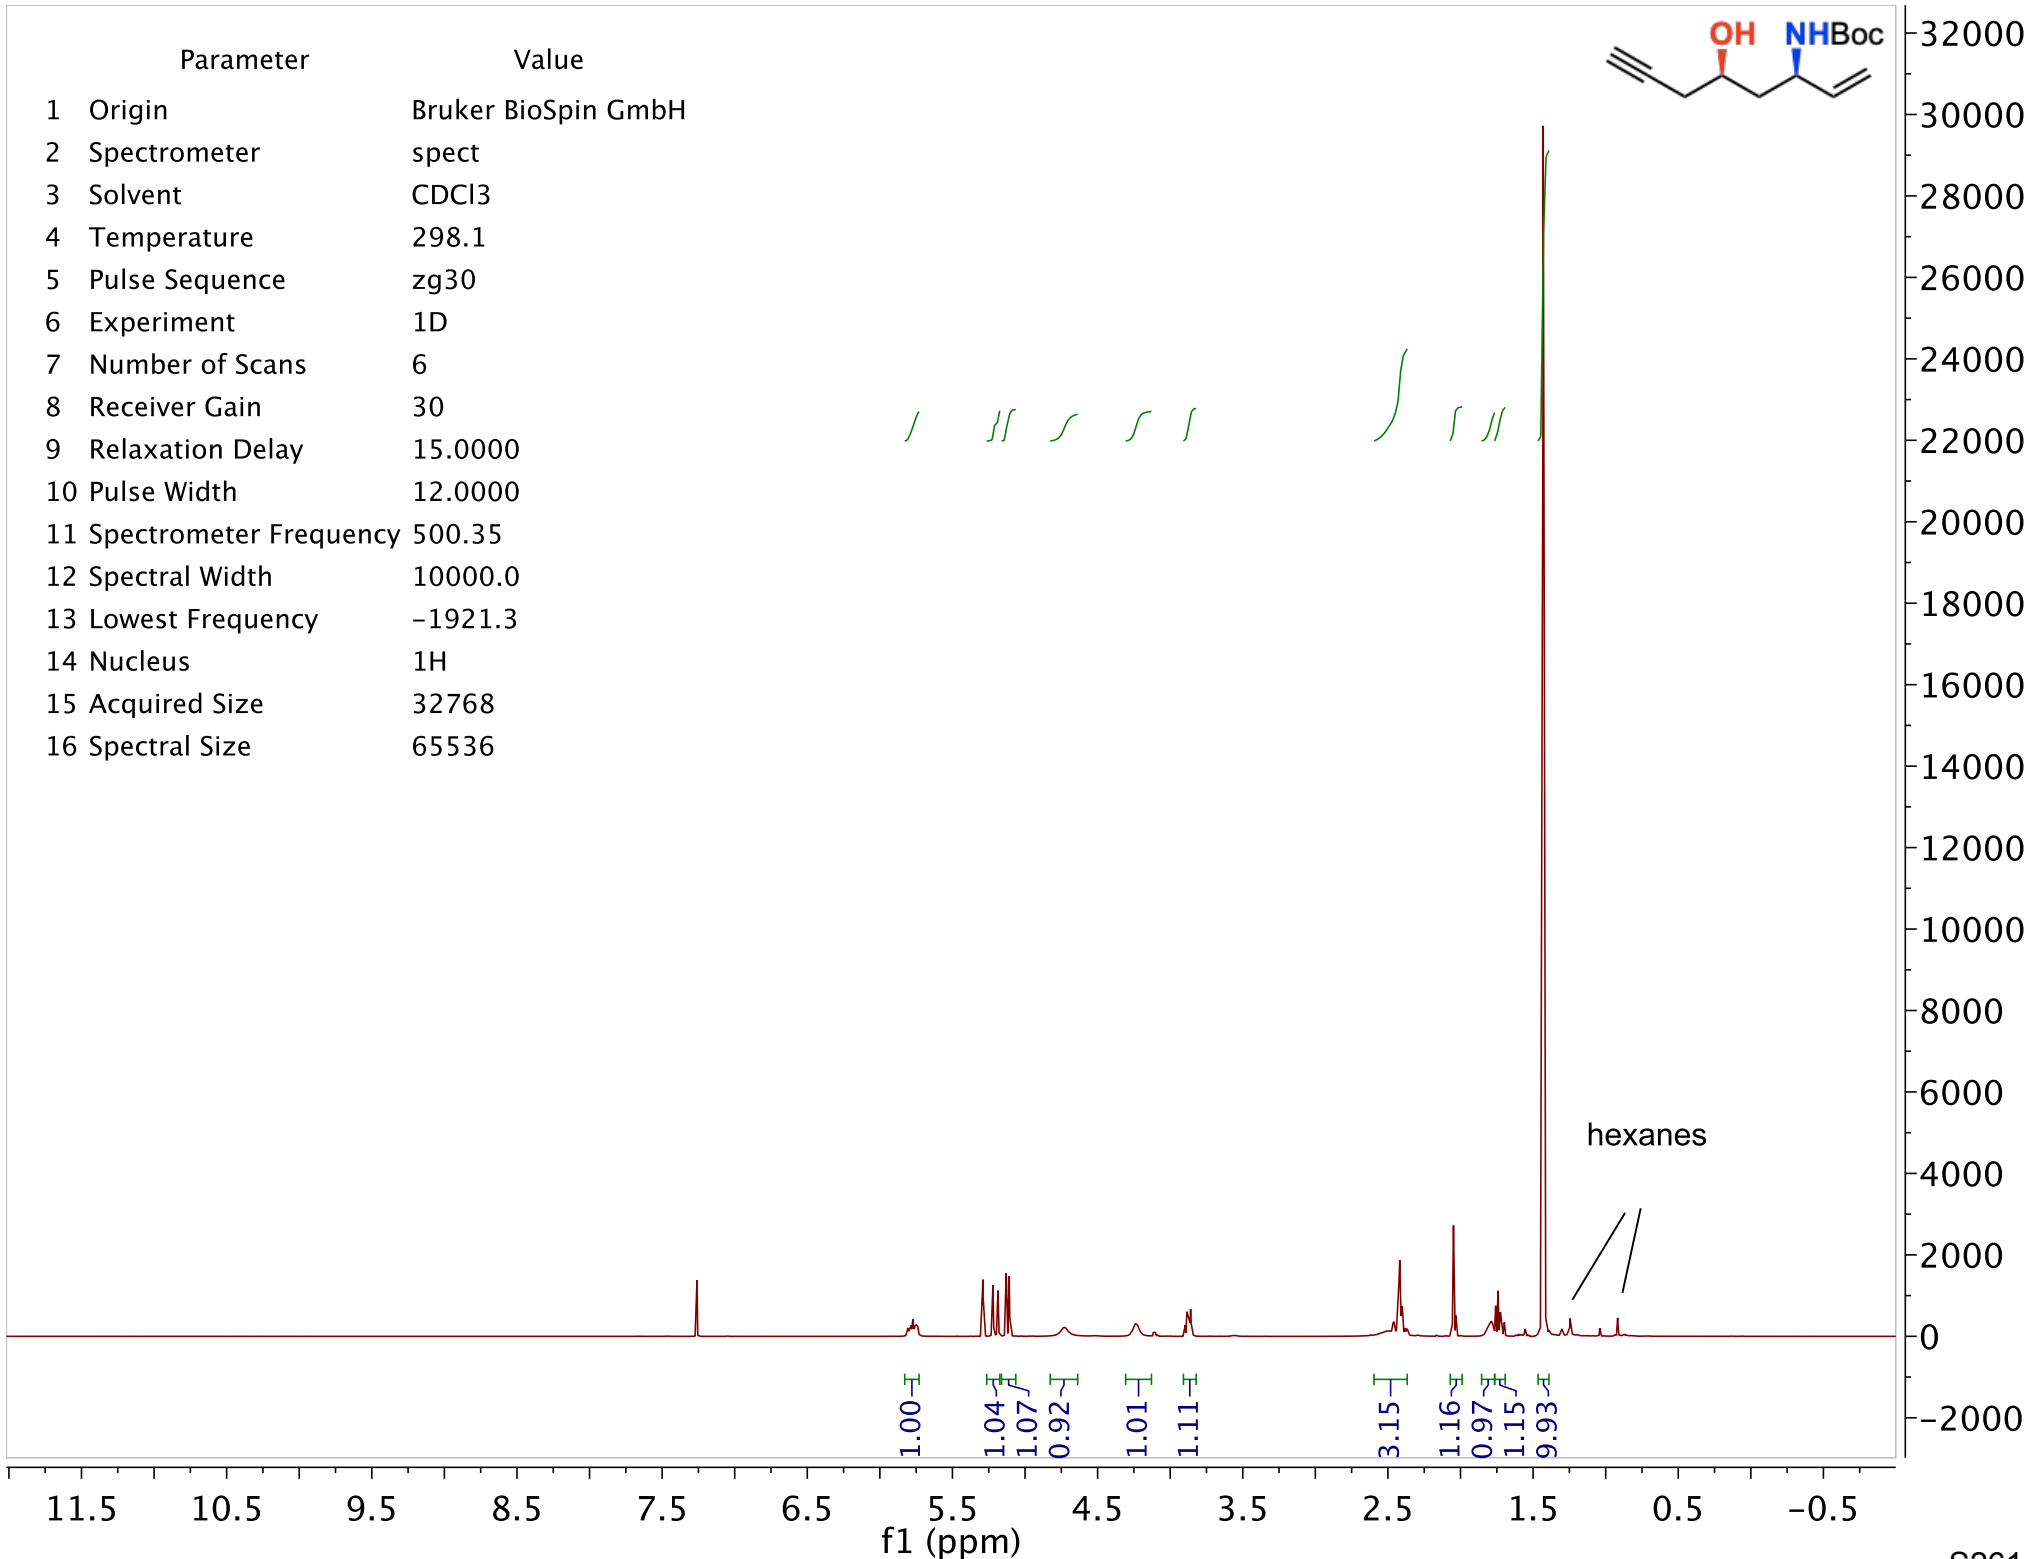

| Parameter                 | Value               |
|---------------------------|---------------------|
| 1 Origin                  | Bruker BioSpin GmbH |
| 2 Spectrometer            | spect               |
| 3 Solvent                 | CDCl3               |
| 4 Temperature             | 298.2               |
| 5 Pulse Sequence          | zgpg30              |
| 6 Experiment              | 1D                  |
| 7 Number of Scans         | 1024                |
| 8 Receiver Gain           | 191                 |
| 9 Relaxation Delay        | 1.0000              |
| 10 Pulse Width            | 10.0000             |
| 11 Spectrometer Frequency | 125.83              |
| 12 Spectral Width         | 31512.6             |
| 13 Lowest Frequency       | -1900.5             |
| 14 Nucleus                | <sup>13</sup> C     |
| 15 Acquired Size          | 32768               |
| 16 Spectral Size          | 65536               |

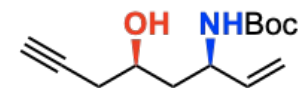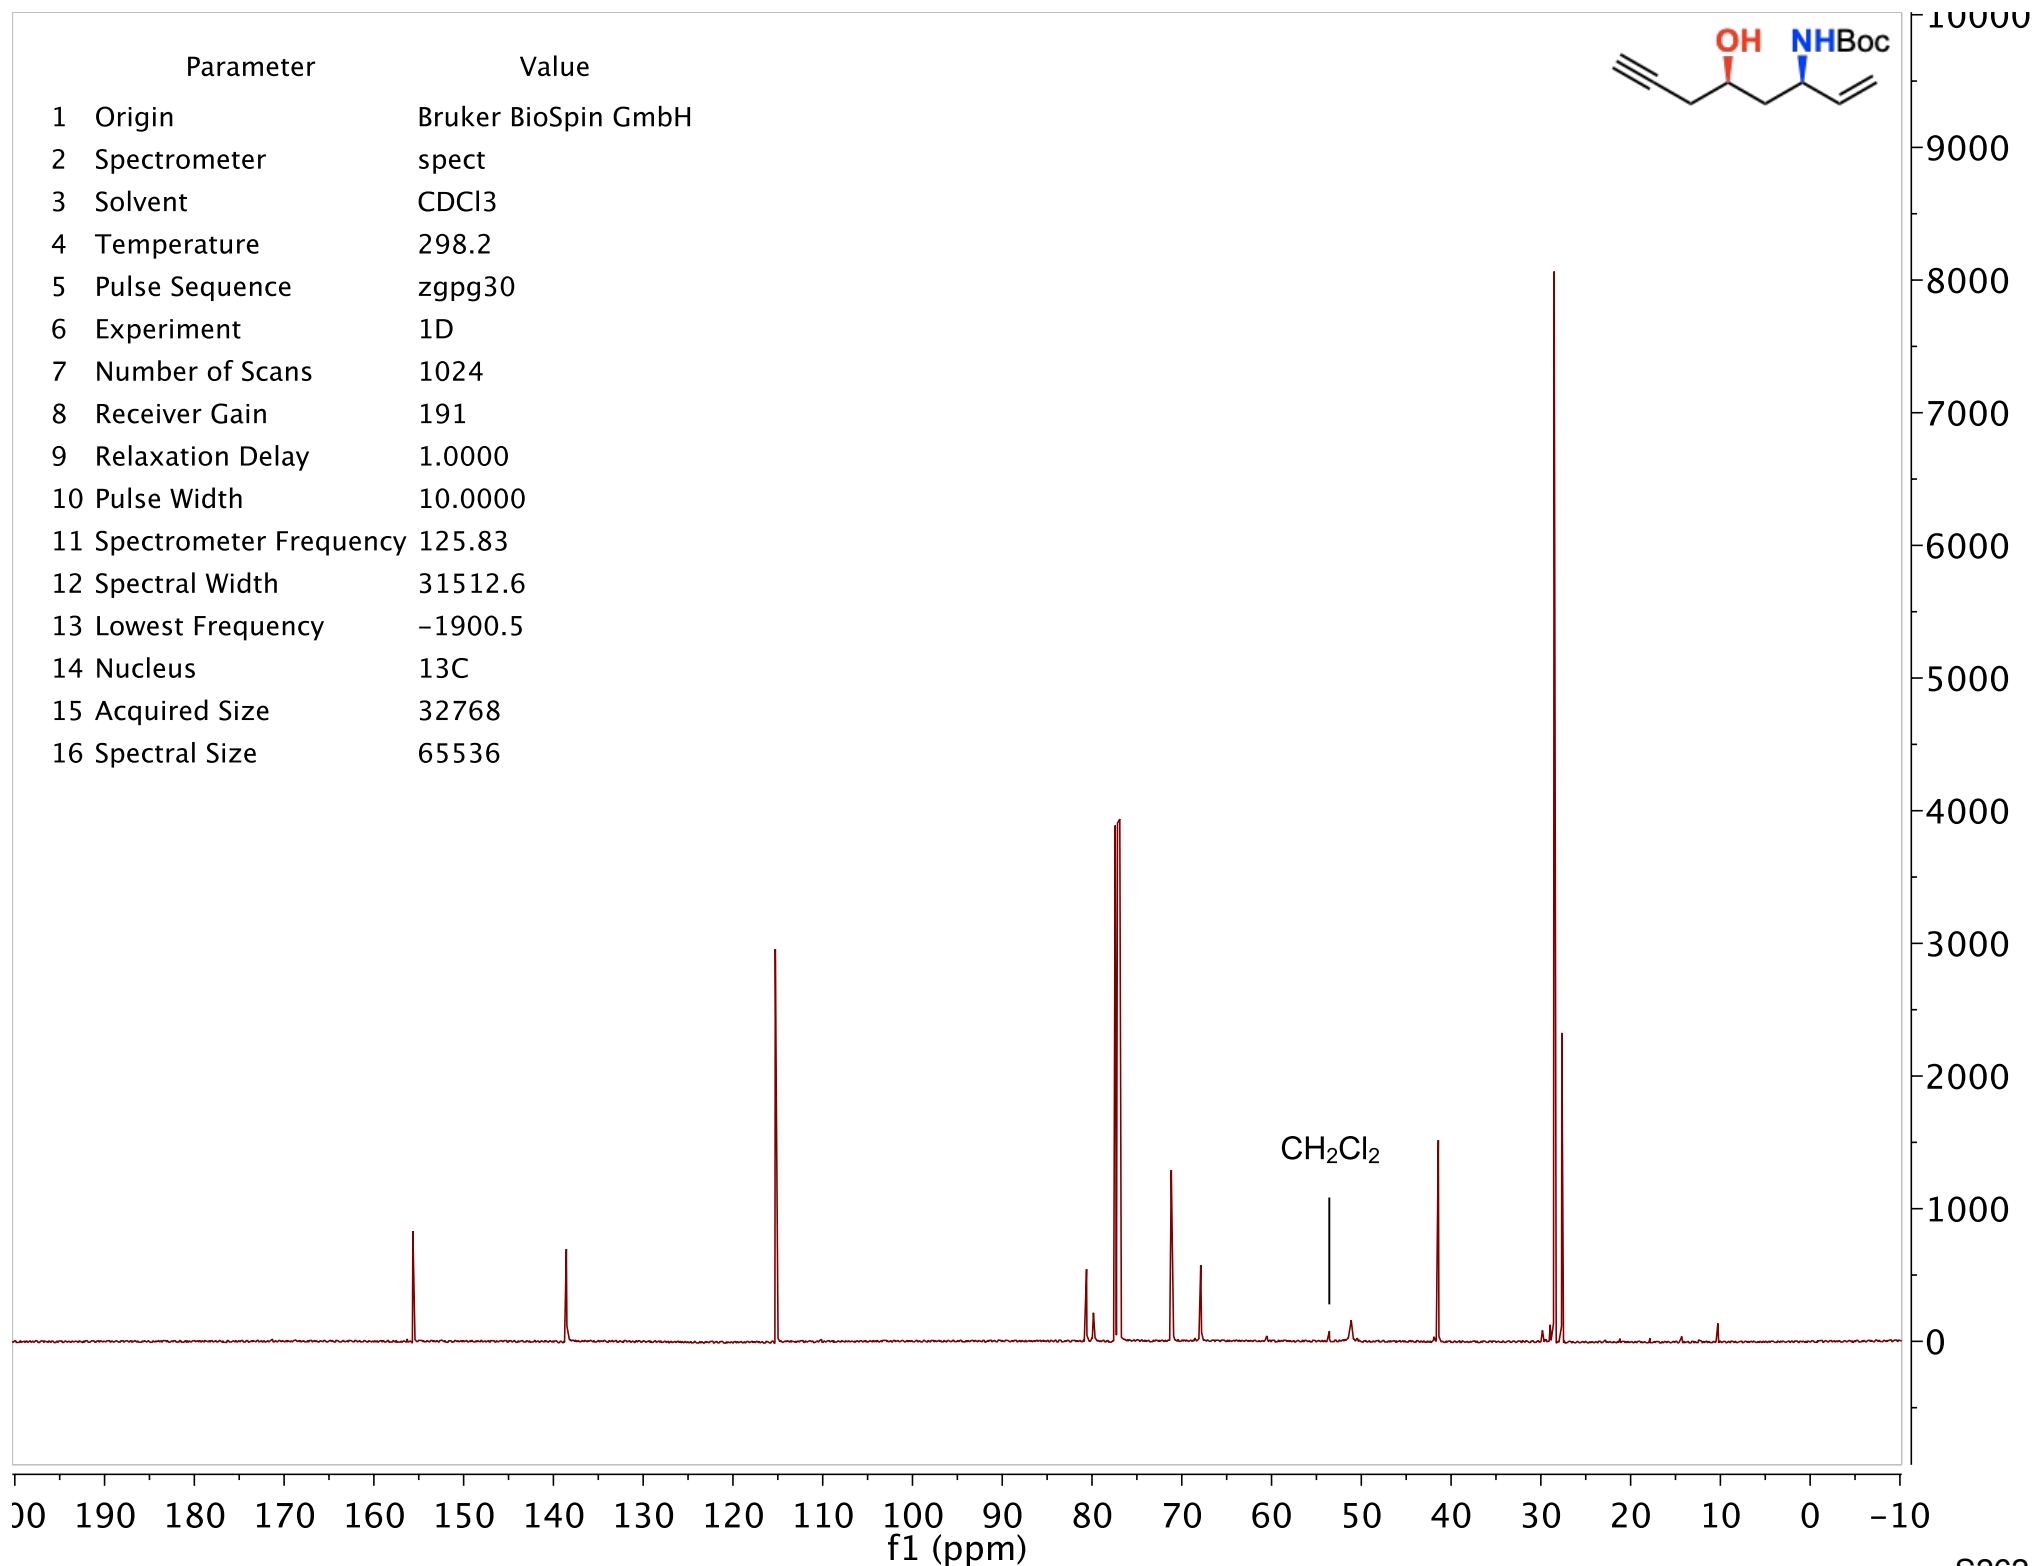



| Parameter                 | Value               |
|---------------------------|---------------------|
| 1 Origin                  | Bruker BioSpin GmbH |
| 2 Spectrometer            | spect               |
| 3 Solvent                 | CDCl3               |
| 4 Temperature             | 296.2               |
| 5 Pulse Sequence          | zg30                |
| 6 Experiment              | 1D                  |
| 7 Number of Scans         | 4                   |
| 8 Receiver Gain           | 30                  |
| 9 Relaxation Delay        | 15.0000             |
| 10 Pulse Width            | 12.0000             |
| 11 Spectrometer Frequency | 500.35              |
| 12 Spectral Width         | 10000.0             |
| 13 Lowest Frequency       | -1922.8             |
| 14 Nucleus                | 1H                  |
| 15 Acquired Size          | 32768               |
| 16 Spectral Size          | 65536               |

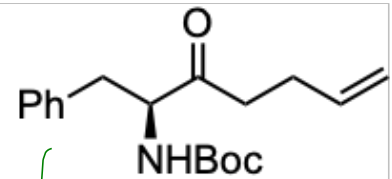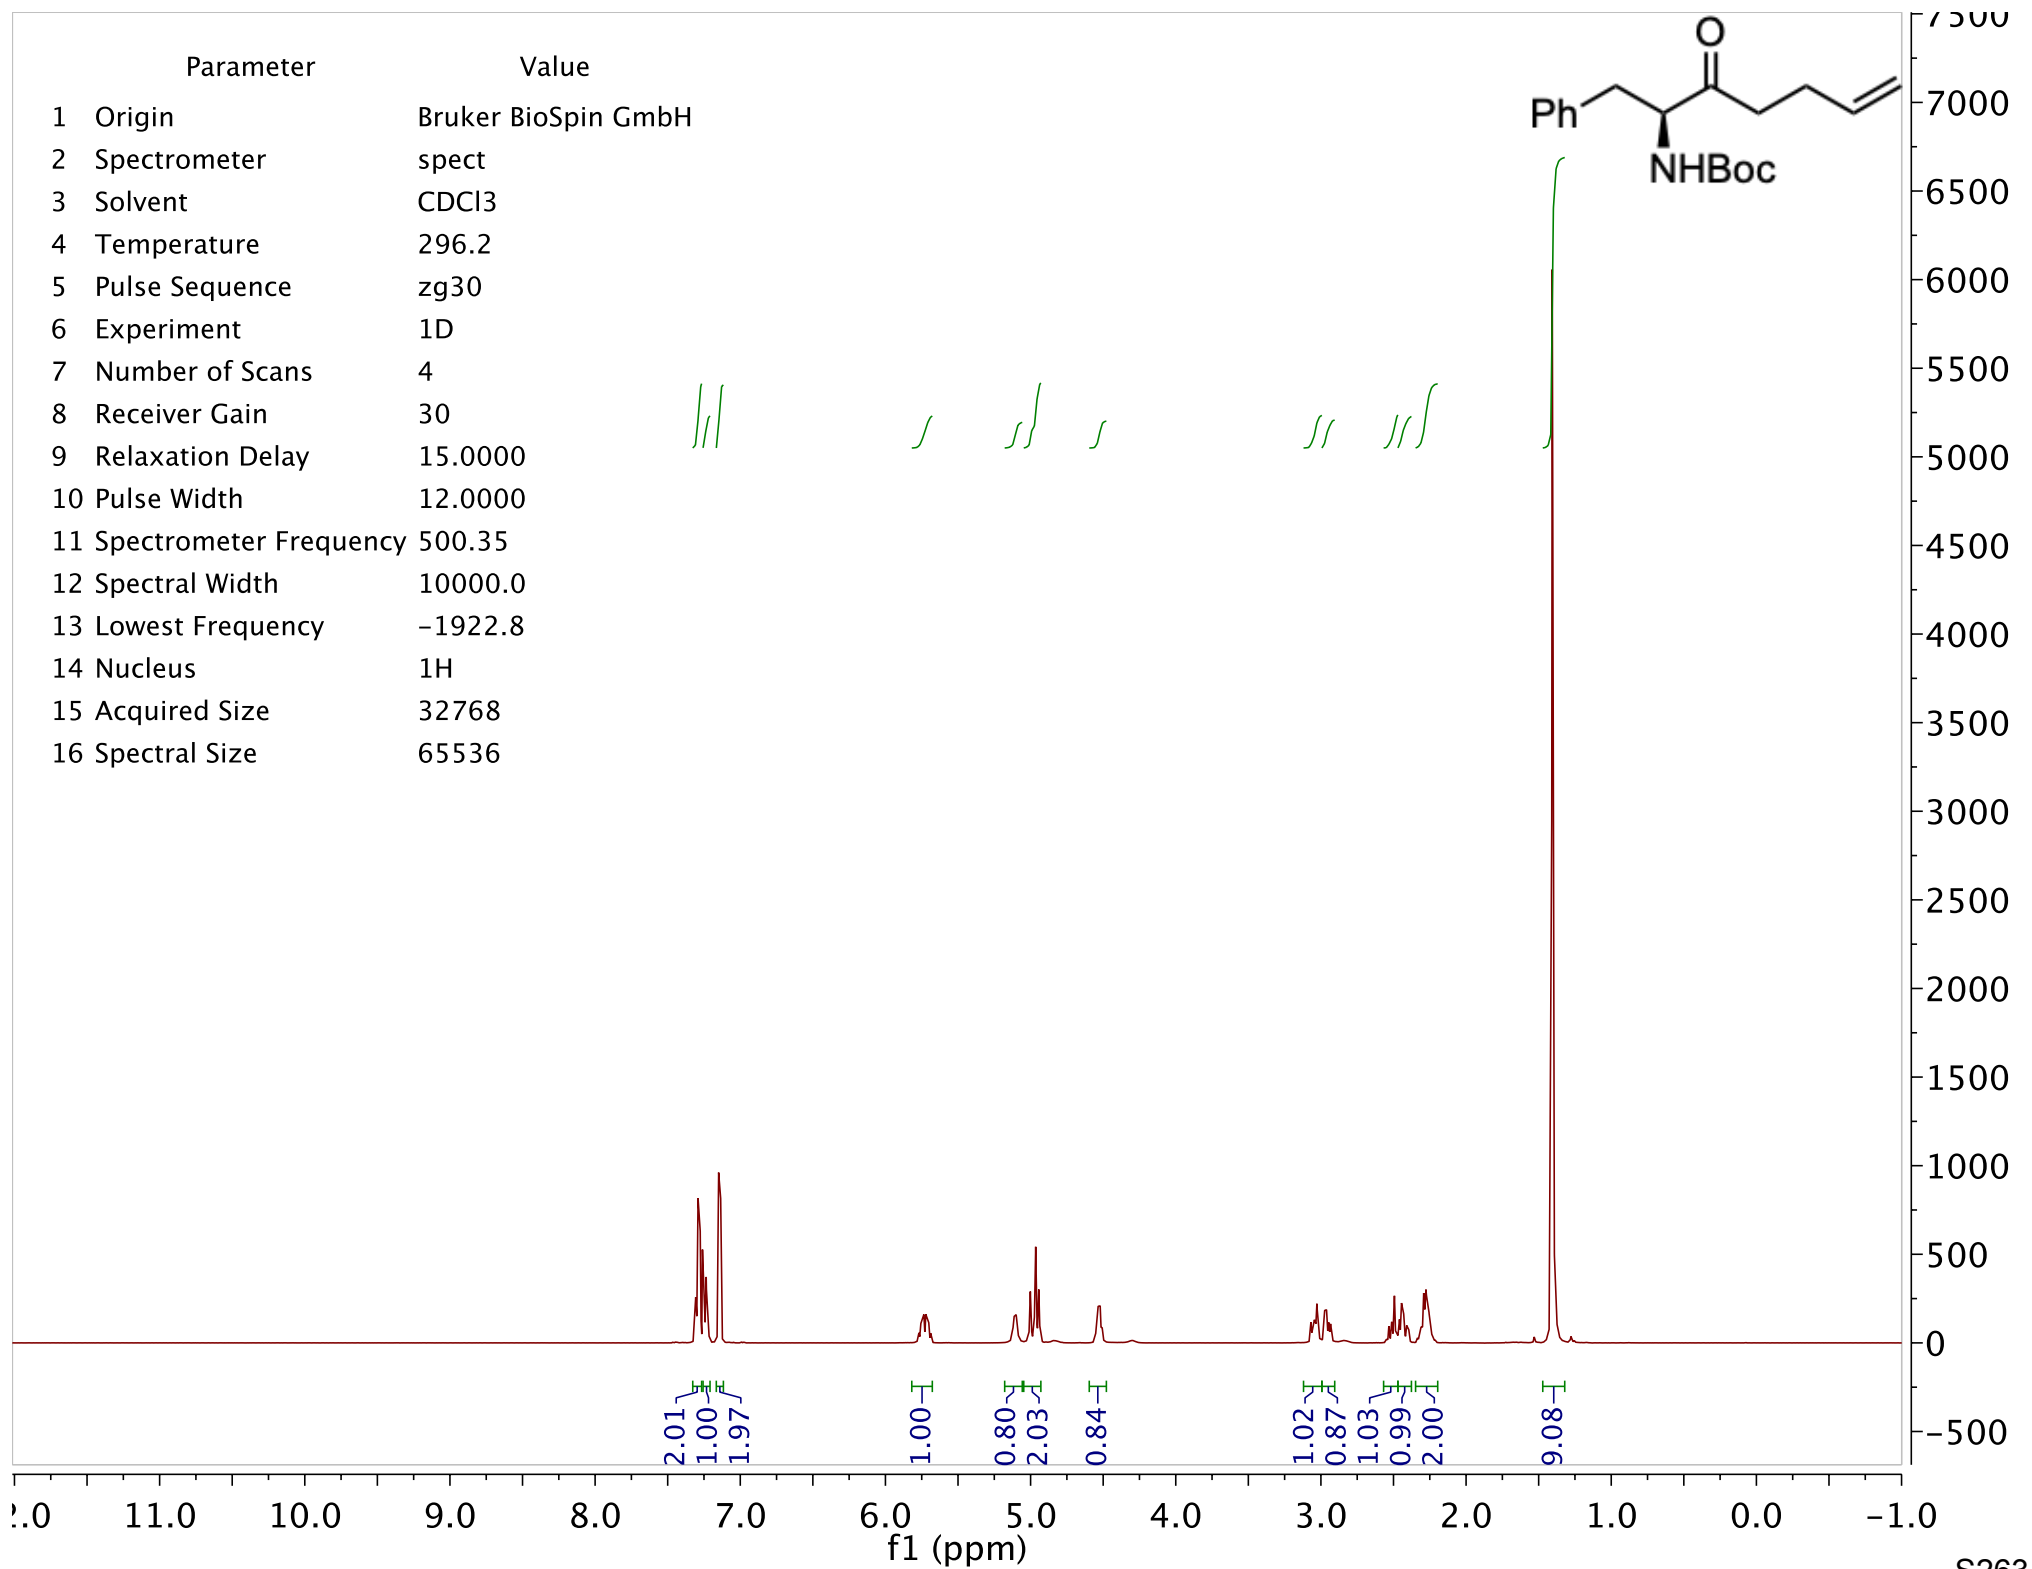

| Parameter                 | Value               |
|---------------------------|---------------------|
| 1 Origin                  | Bruker BioSpin GmbH |
| 2 Spectrometer            | spect               |
| 3 Solvent                 | CDCl3               |
| 4 Temperature             | 296.1               |
| 5 Pulse Sequence          | zgpg30              |
| 6 Experiment              | 1D                  |
| 7 Number of Scans         | 800                 |
| 8 Receiver Gain           | 191                 |
| 9 Relaxation Delay        | 1.0000              |
| 10 Pulse Width            | 10.0000             |
| 11 Spectrometer Frequency | 125.83              |
| 12 Spectral Width         | 31512.6             |
| 13 Lowest Frequency       | -1916.9             |
| 14 Nucleus                | 13C                 |
| 15 Acquired Size          | 32768               |
| 16 Spectral Size          | 65536               |

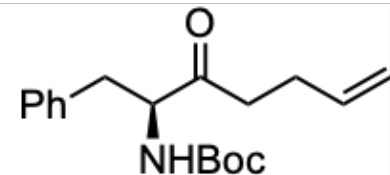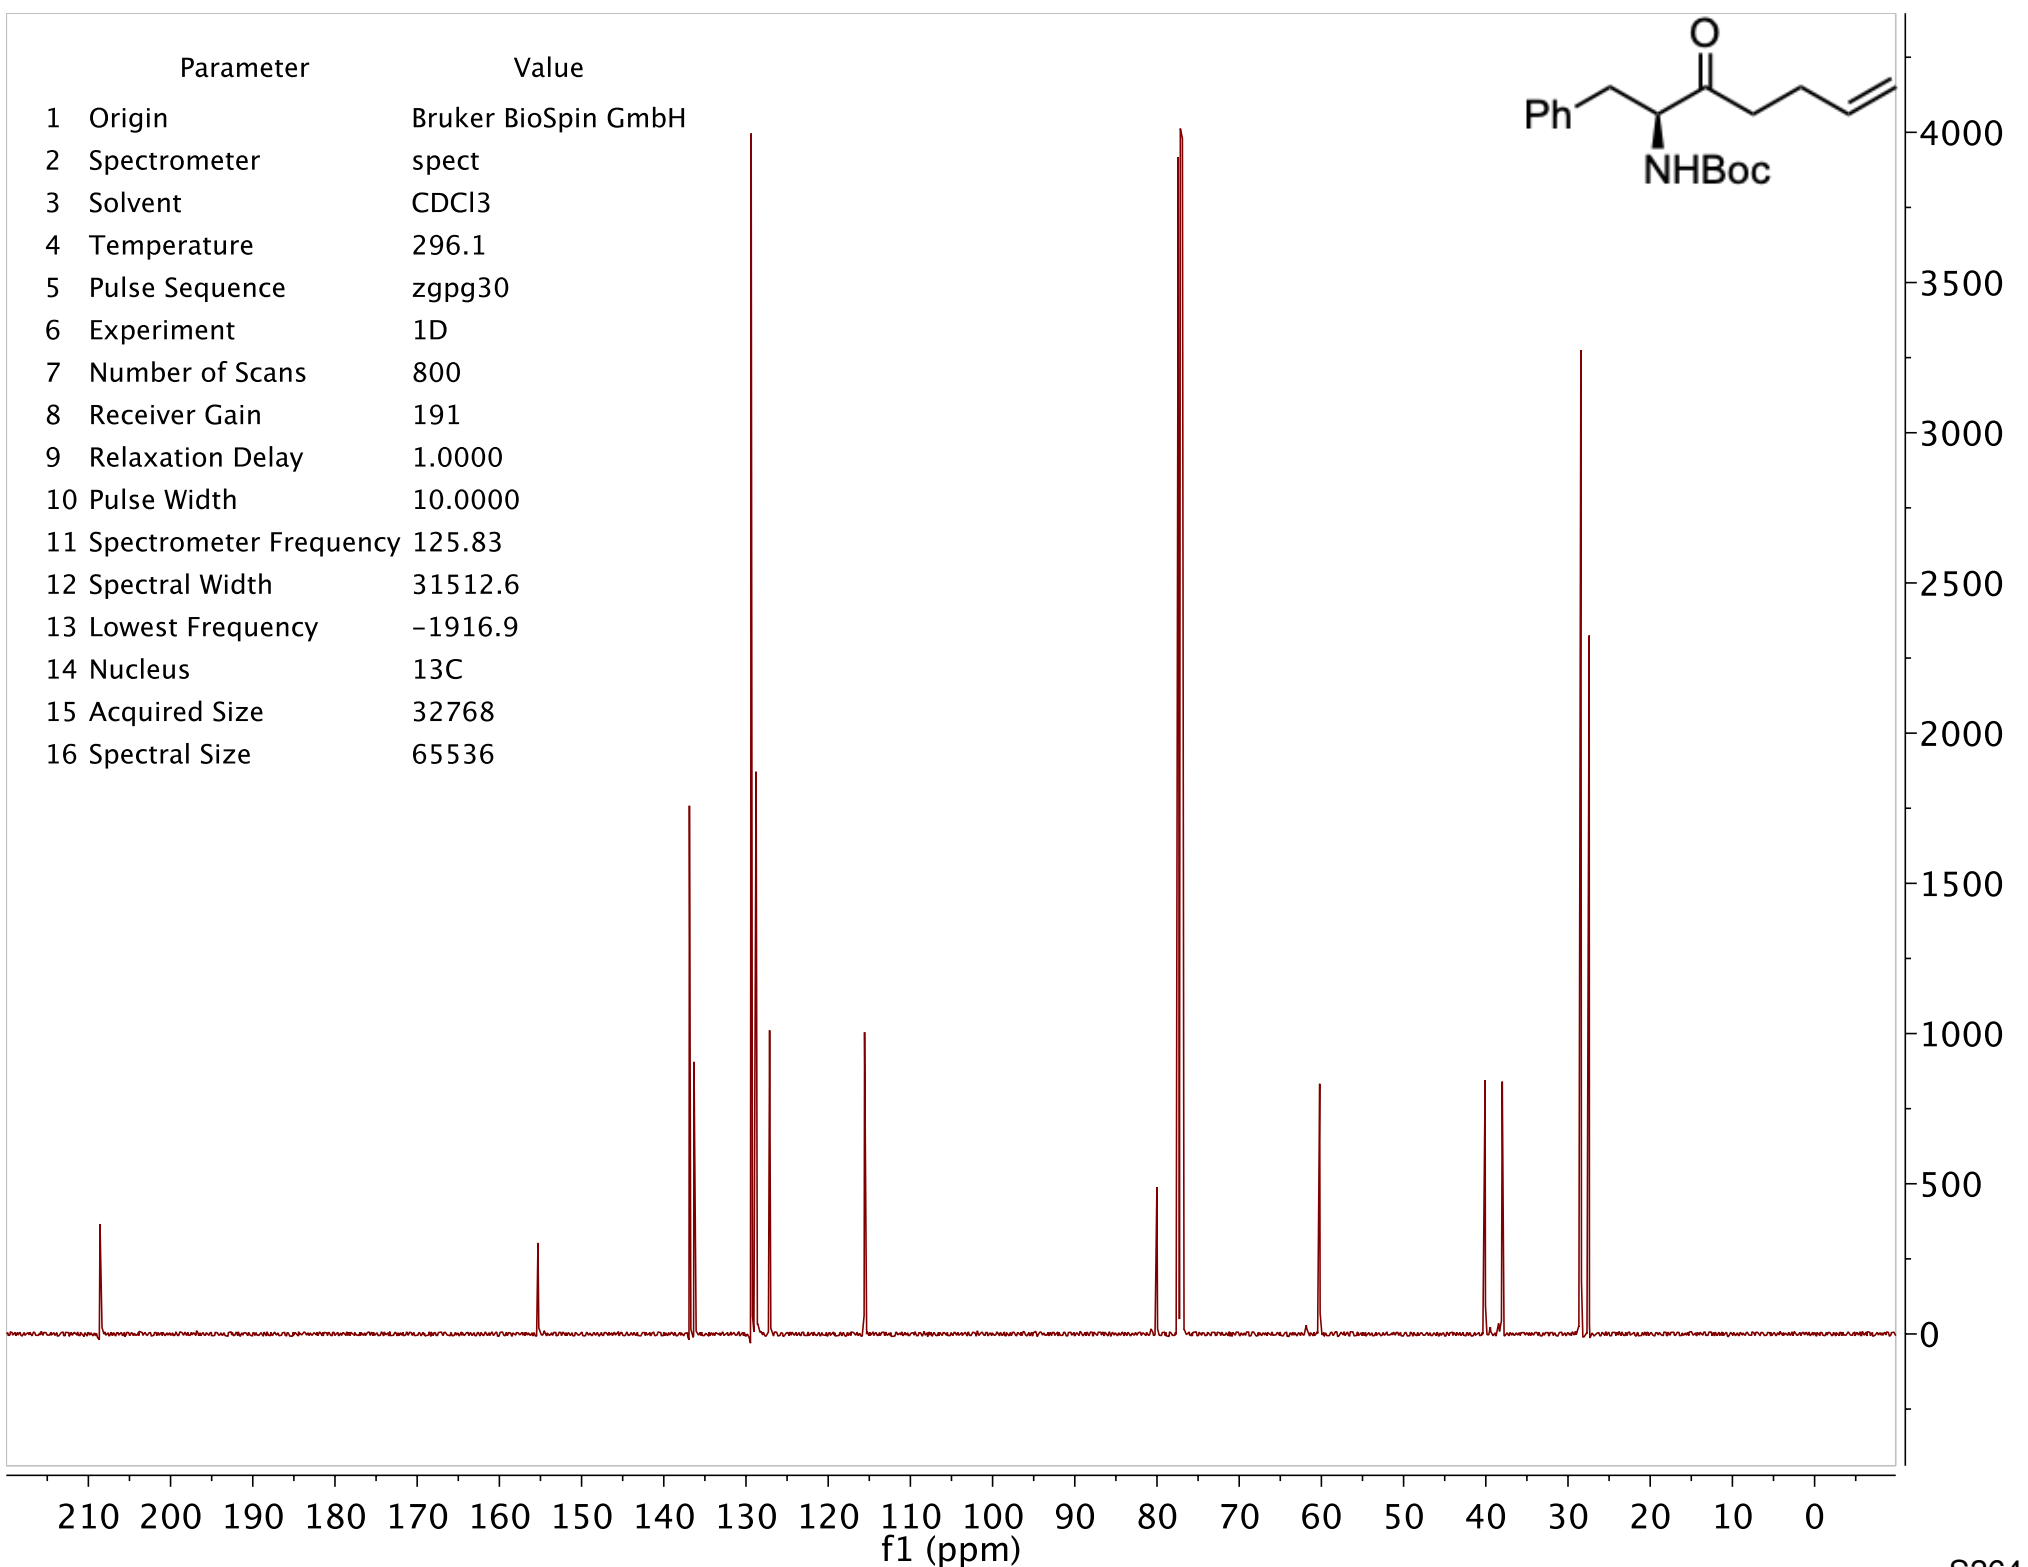

| Parameter                 | Value               |
|---------------------------|---------------------|
| 1 Origin                  | Bruker BioSpin GmbH |
| 2 Spectrometer            | spect               |
| 3 Solvent                 | CDCl3               |
| 4 Temperature             | 296.1               |
| 5 Pulse Sequence          | zg30                |
| 6 Experiment              | 1D                  |
| 7 Number of Scans         | 4                   |
| 8 Receiver Gain           | 62                  |
| 9 Relaxation Delay        | 15.0000             |
| 10 Pulse Width            | 12.0000             |
| 11 Spectrometer Frequency | 500.35              |
| 12 Spectral Width         | 10000.0             |
| 13 Lowest Frequency       | -1922.8             |
| 14 Nucleus                | 1H                  |
| 15 Acquired Size          | 32768               |
| 16 Spectral Size          | 65536               |

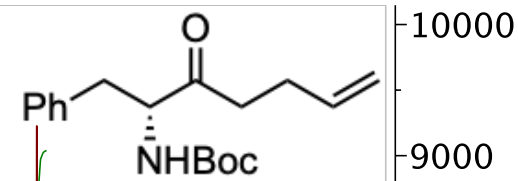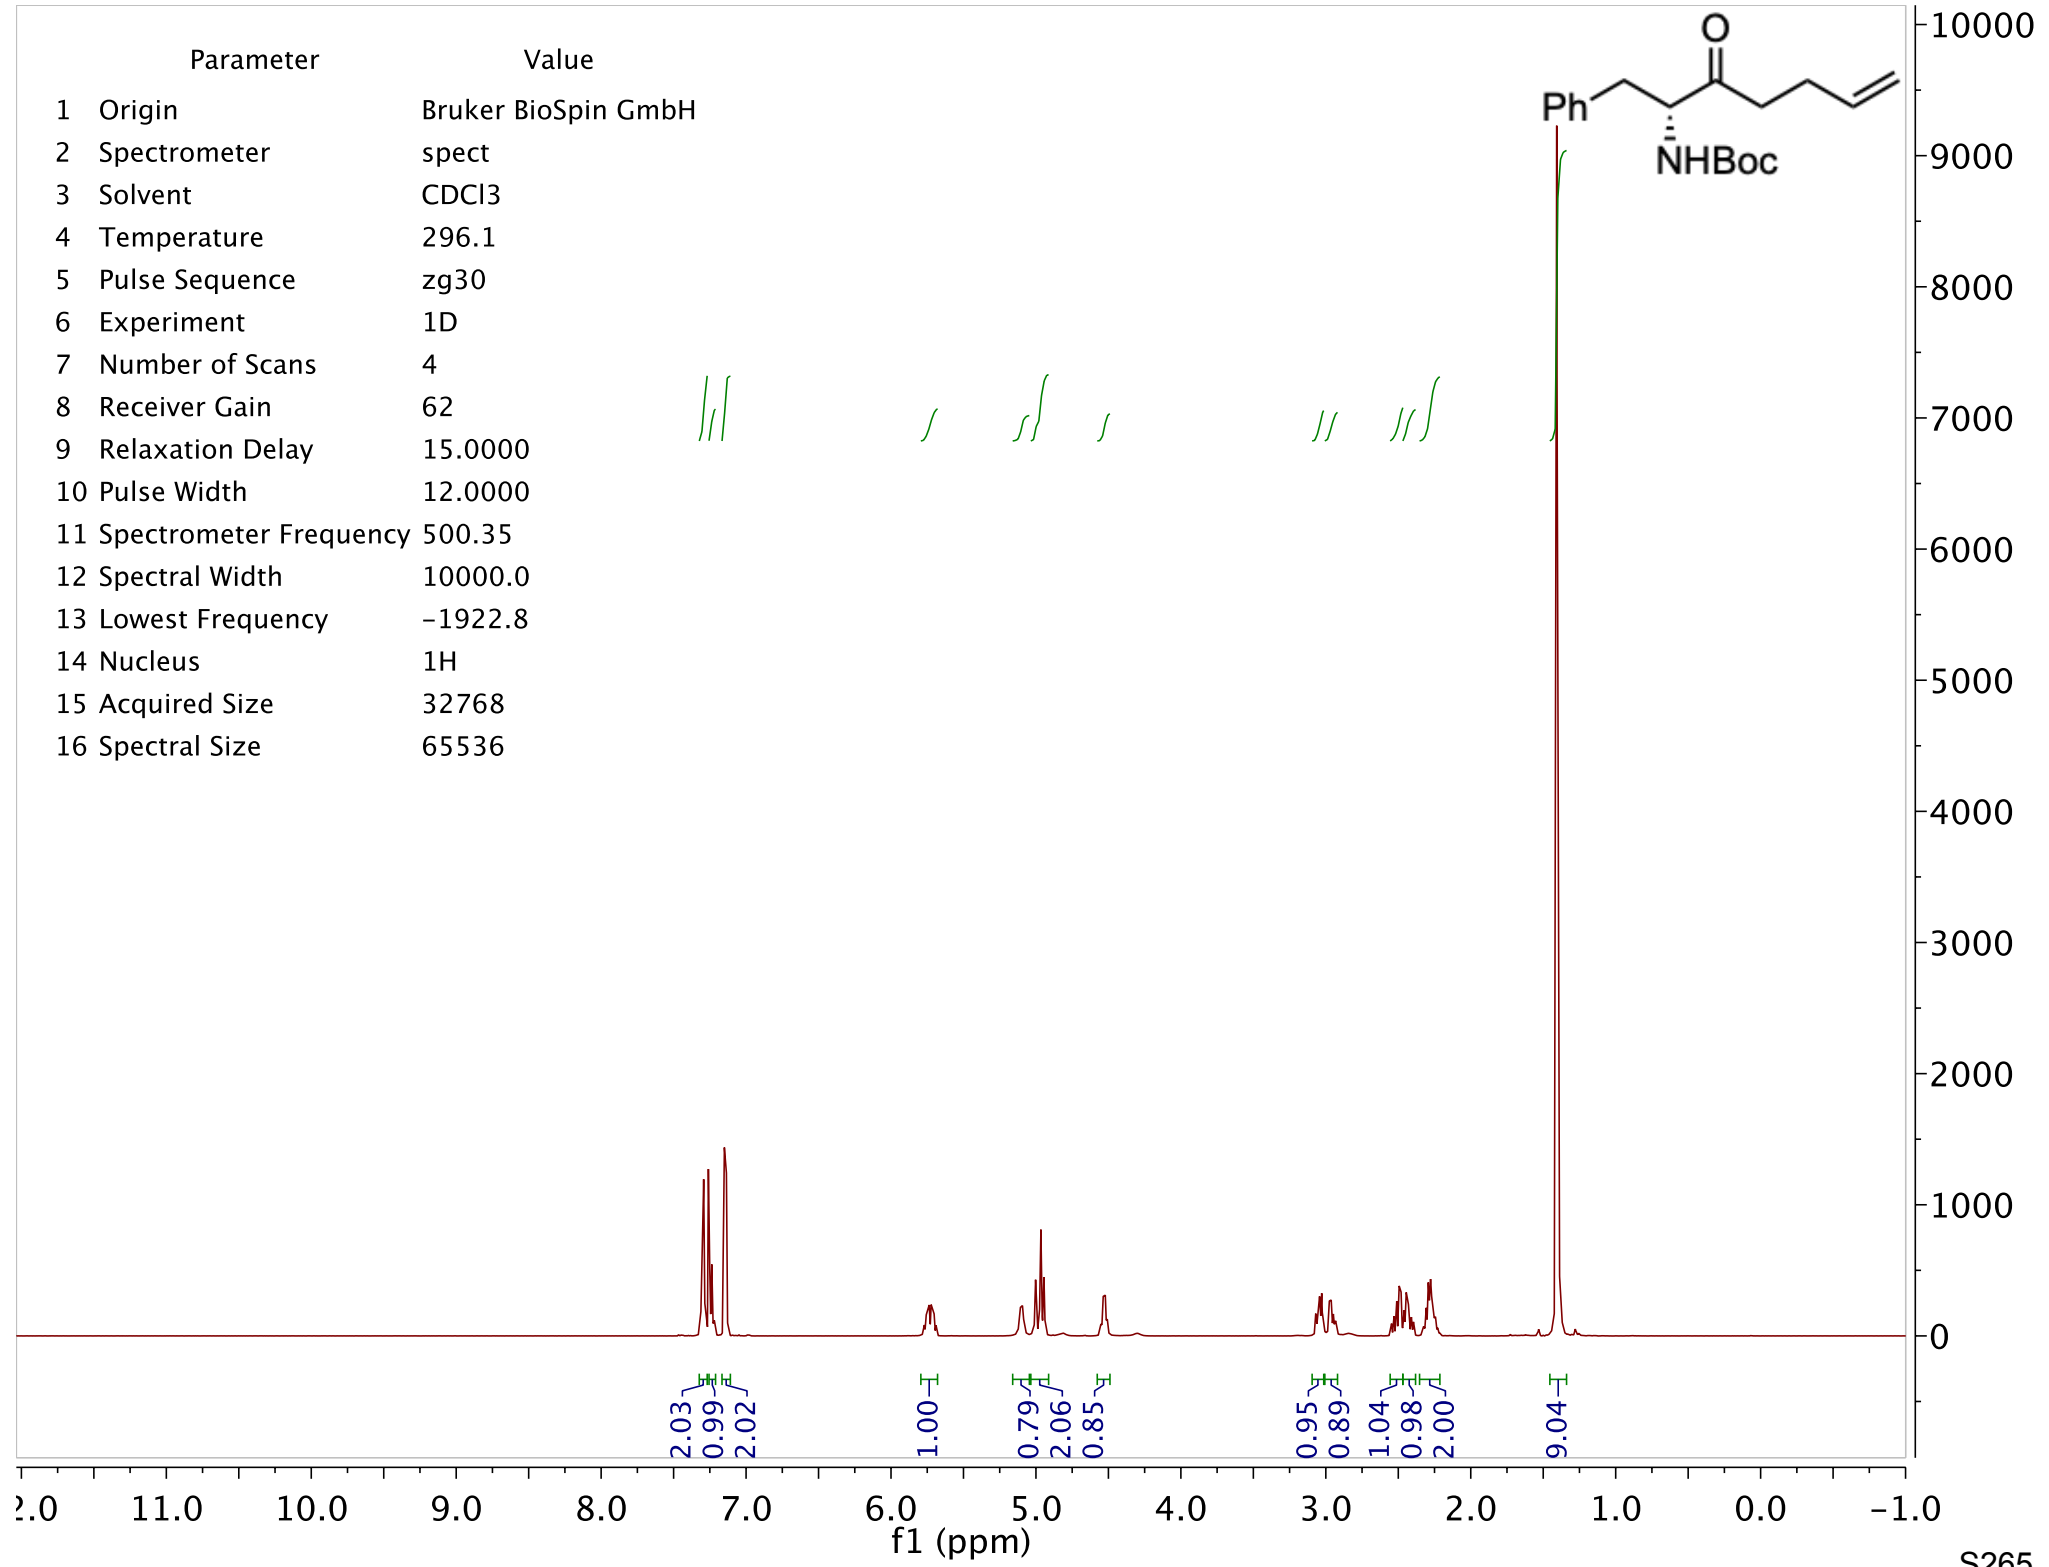

| Parameter                 | Value               |
|---------------------------|---------------------|
| 1 Origin                  | Bruker BioSpin GmbH |
| 2 Spectrometer            | spect               |
| 3 Solvent                 | CDCl3               |
| 4 Temperature             | 296.1               |
| 5 Pulse Sequence          | zgpg30              |
| 6 Experiment              | 1D                  |
| 7 Number of Scans         | 1000                |
| 8 Receiver Gain           | 191                 |
| 9 Relaxation Delay        | 1.0000              |
| 10 Pulse Width            | 10.0000             |
| 11 Spectrometer Frequency | 125.83              |
| 12 Spectral Width         | 31512.6             |
| 13 Lowest Frequency       | -1900.1             |
| 14 Nucleus                | <sup>13</sup> C     |
| 15 Acquired Size          | 32768               |
| 16 Spectral Size          | 65536               |

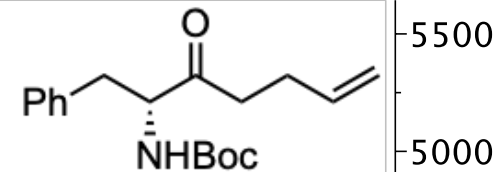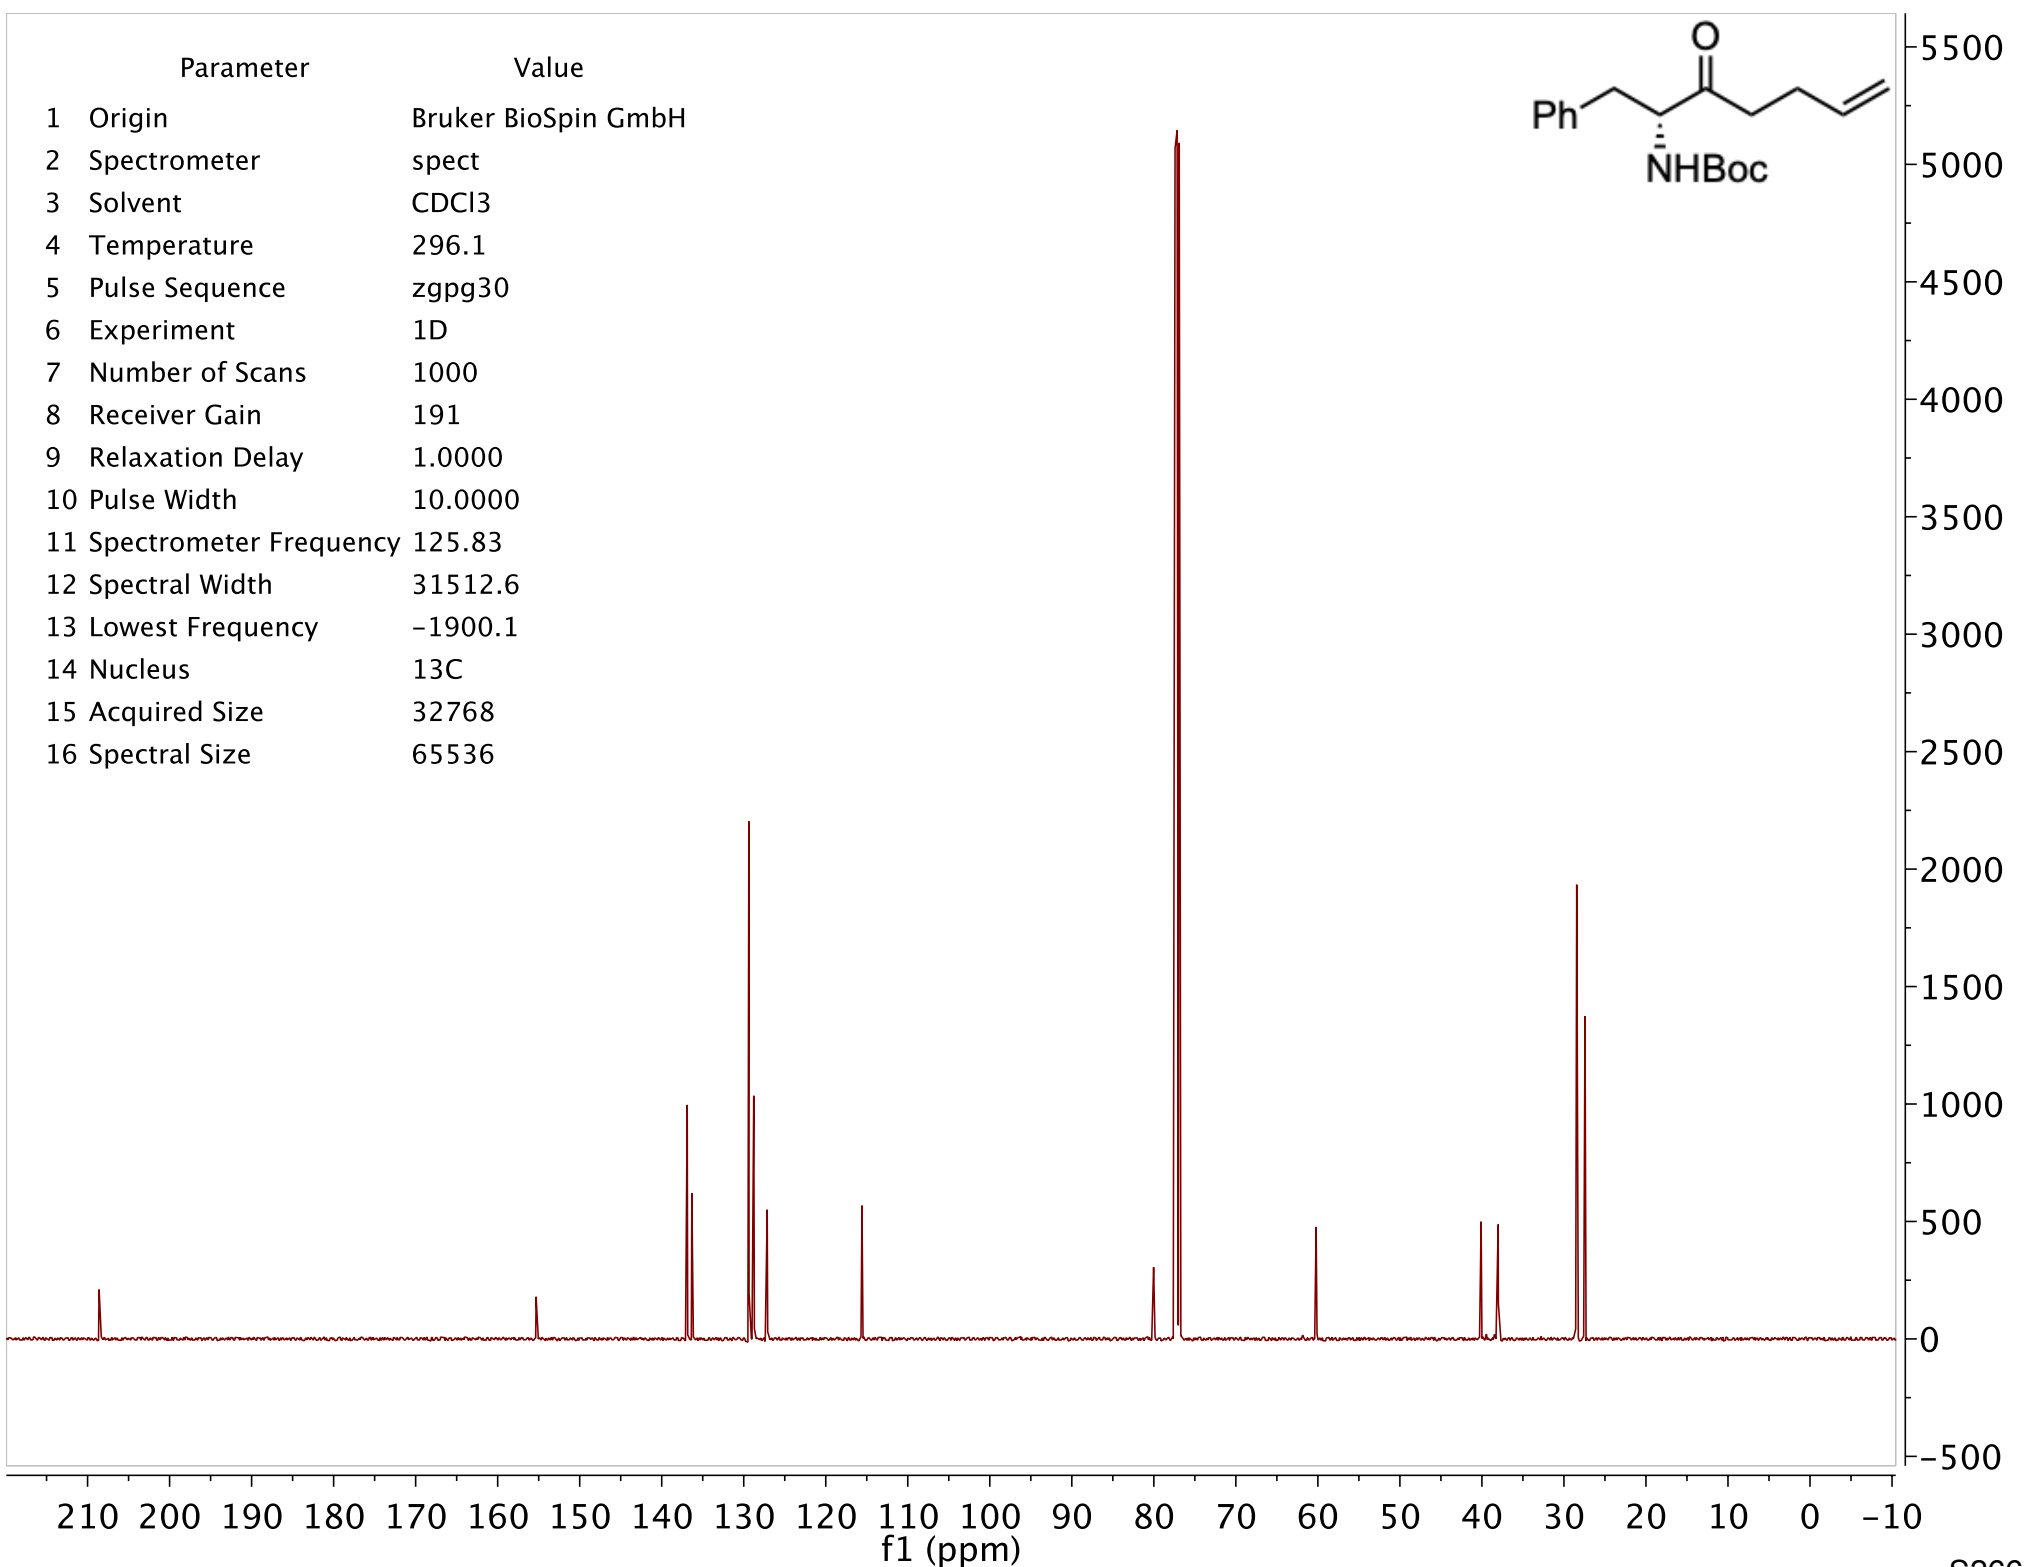

| Parameter                 | Value               |
|---------------------------|---------------------|
| 1 Origin                  | Bruker BioSpin GmbH |
| 2 Spectrometer            | spect               |
| 3 Solvent                 | CDCl3               |
| 4 Temperature             | 288.9               |
| 5 Pulse Sequence          | zg30                |
| 6 Experiment              | 1D                  |
| 7 Number of Scans         | 6                   |
| 8 Receiver Gain           | 94                  |
| 9 Relaxation Delay        | 15.0000             |
| 10 Pulse Width            | 12.0000             |
| 11 Spectrometer Frequency | 500.35              |
| 12 Spectral Width         | 10000.0             |
| 13 Lowest Frequency       | -1921.8             |
| 14 Nucleus                | 1H                  |
| 15 Acquired Size          | 32768               |
| 16 Spectral Size          | 65536               |

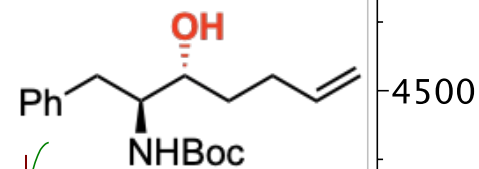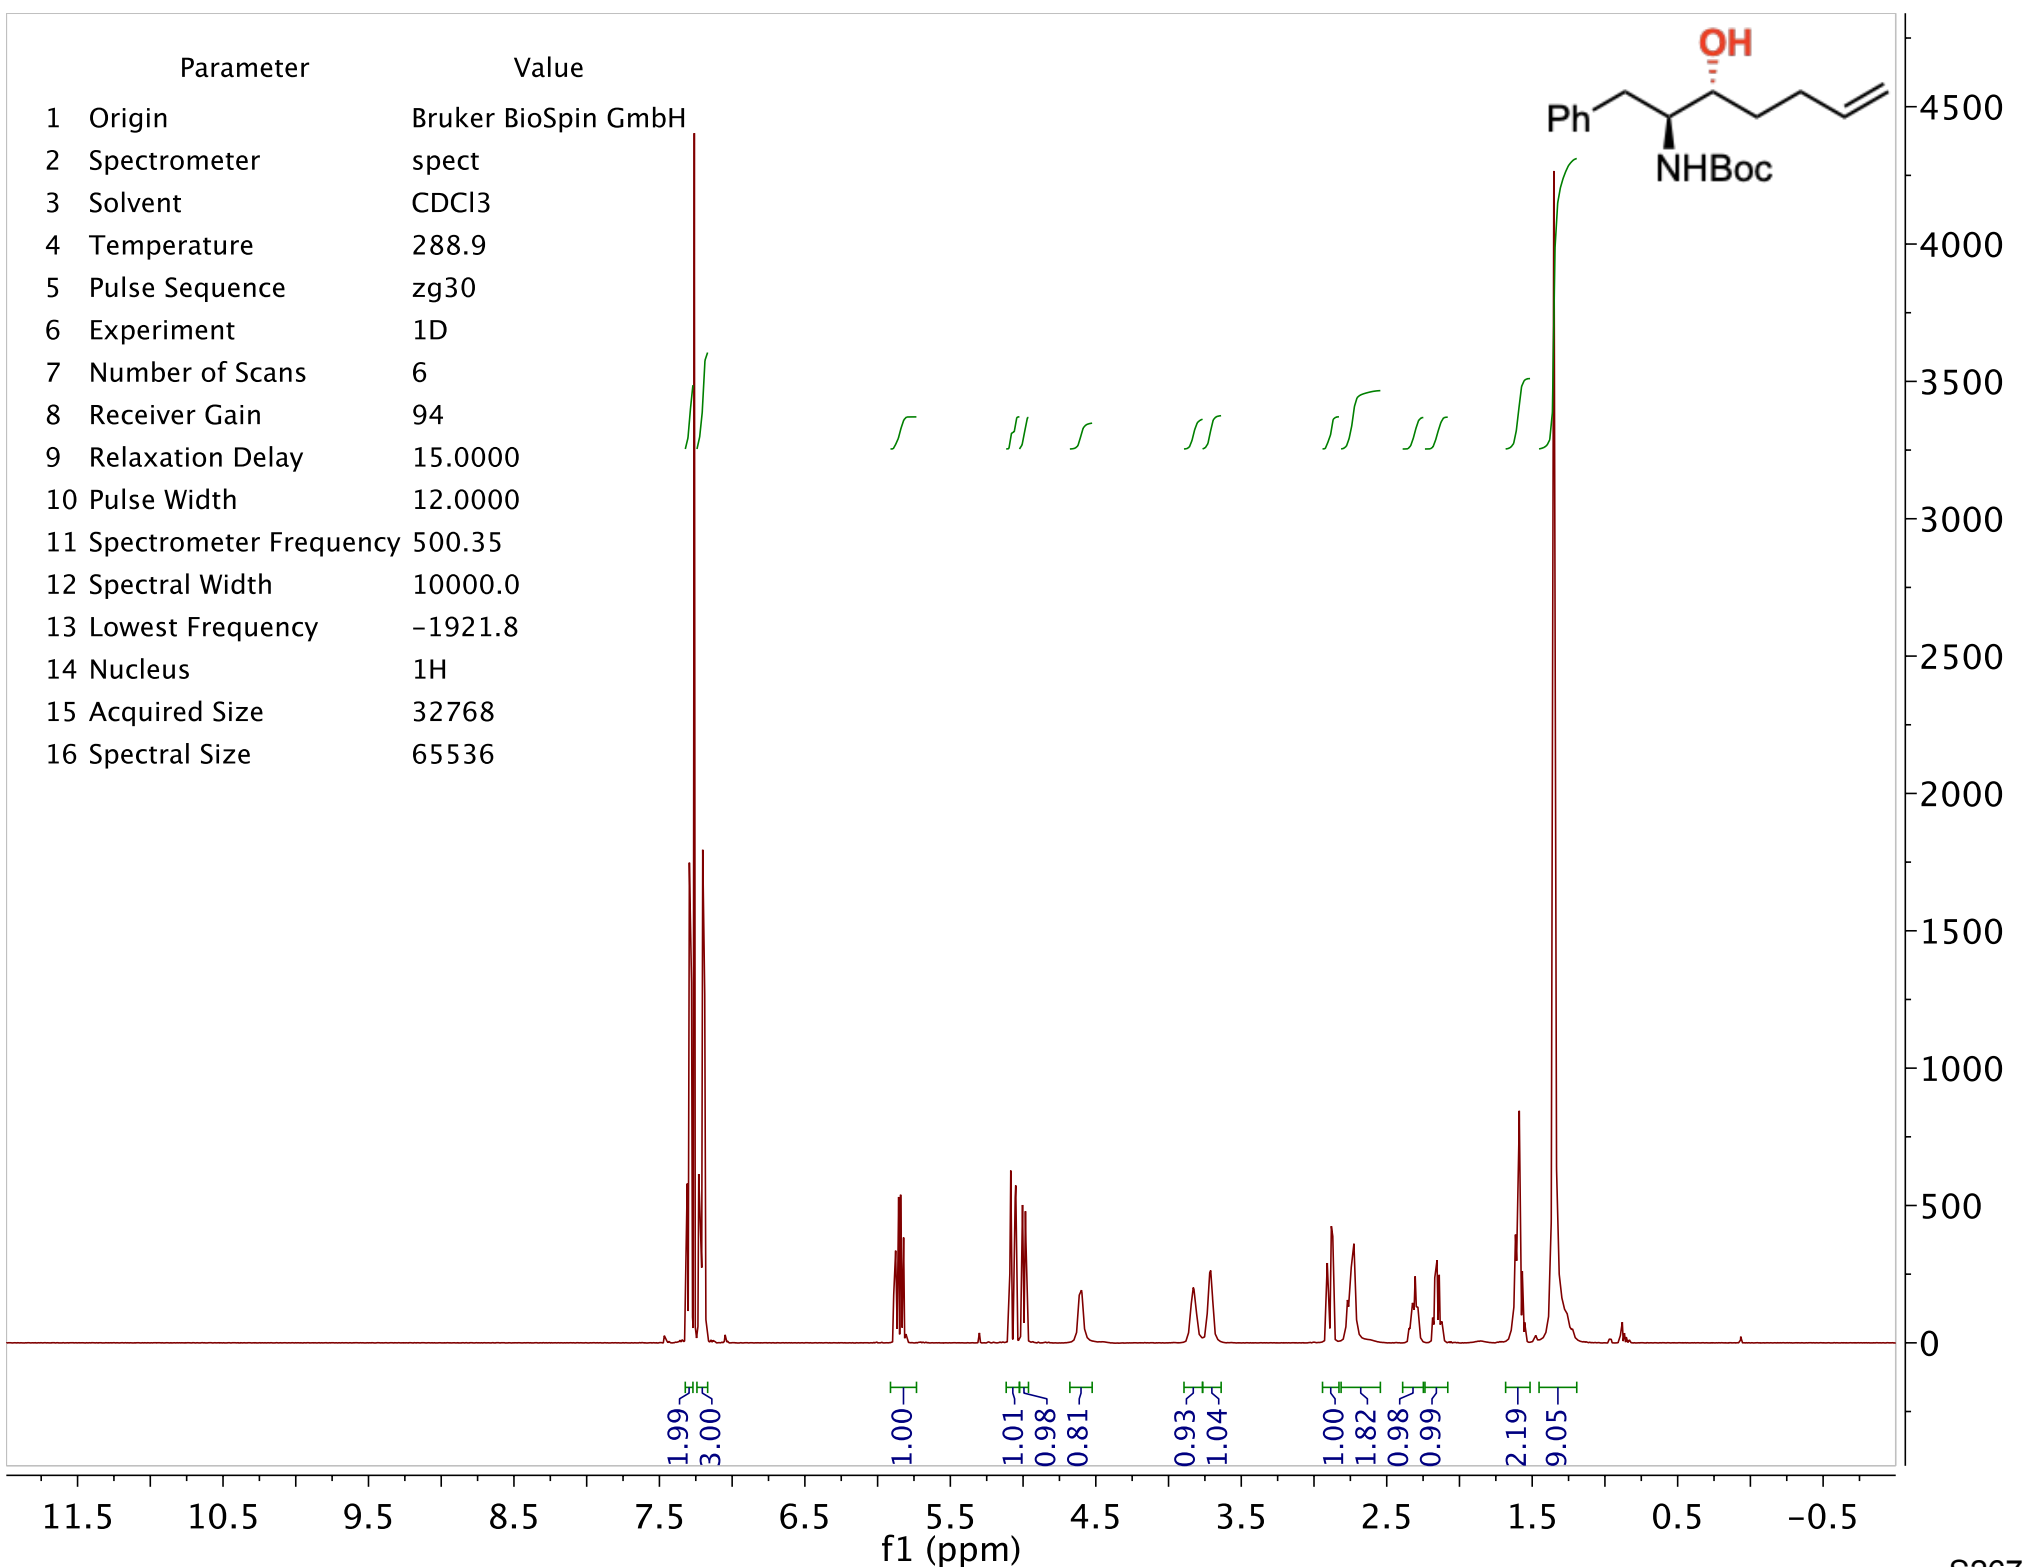

| Parameter                 | Value               |
|---------------------------|---------------------|
| 1 Origin                  | Bruker BioSpin GmbH |
| 2 Spectrometer            | spect               |
| 3 Solvent                 | CDCl3               |
| 4 Temperature             | 298.2               |
| 5 Pulse Sequence          | zgpg30              |
| 6 Experiment              | 1D                  |
| 7 Number of Scans         | 512                 |
| 8 Receiver Gain           | 191                 |
| 9 Relaxation Delay        | 1.0000              |
| 10 Pulse Width            | 10.0000             |
| 11 Spectrometer Frequency | 125.83              |
| 12 Spectral Width         | 31512.6             |
| 13 Lowest Frequency       | -1898.9             |
| 14 Nucleus                | 13C                 |
| 15 Acquired Size          | 32768               |
| 16 Spectral Size          | 65536               |

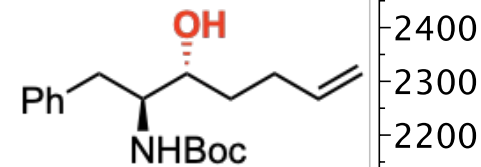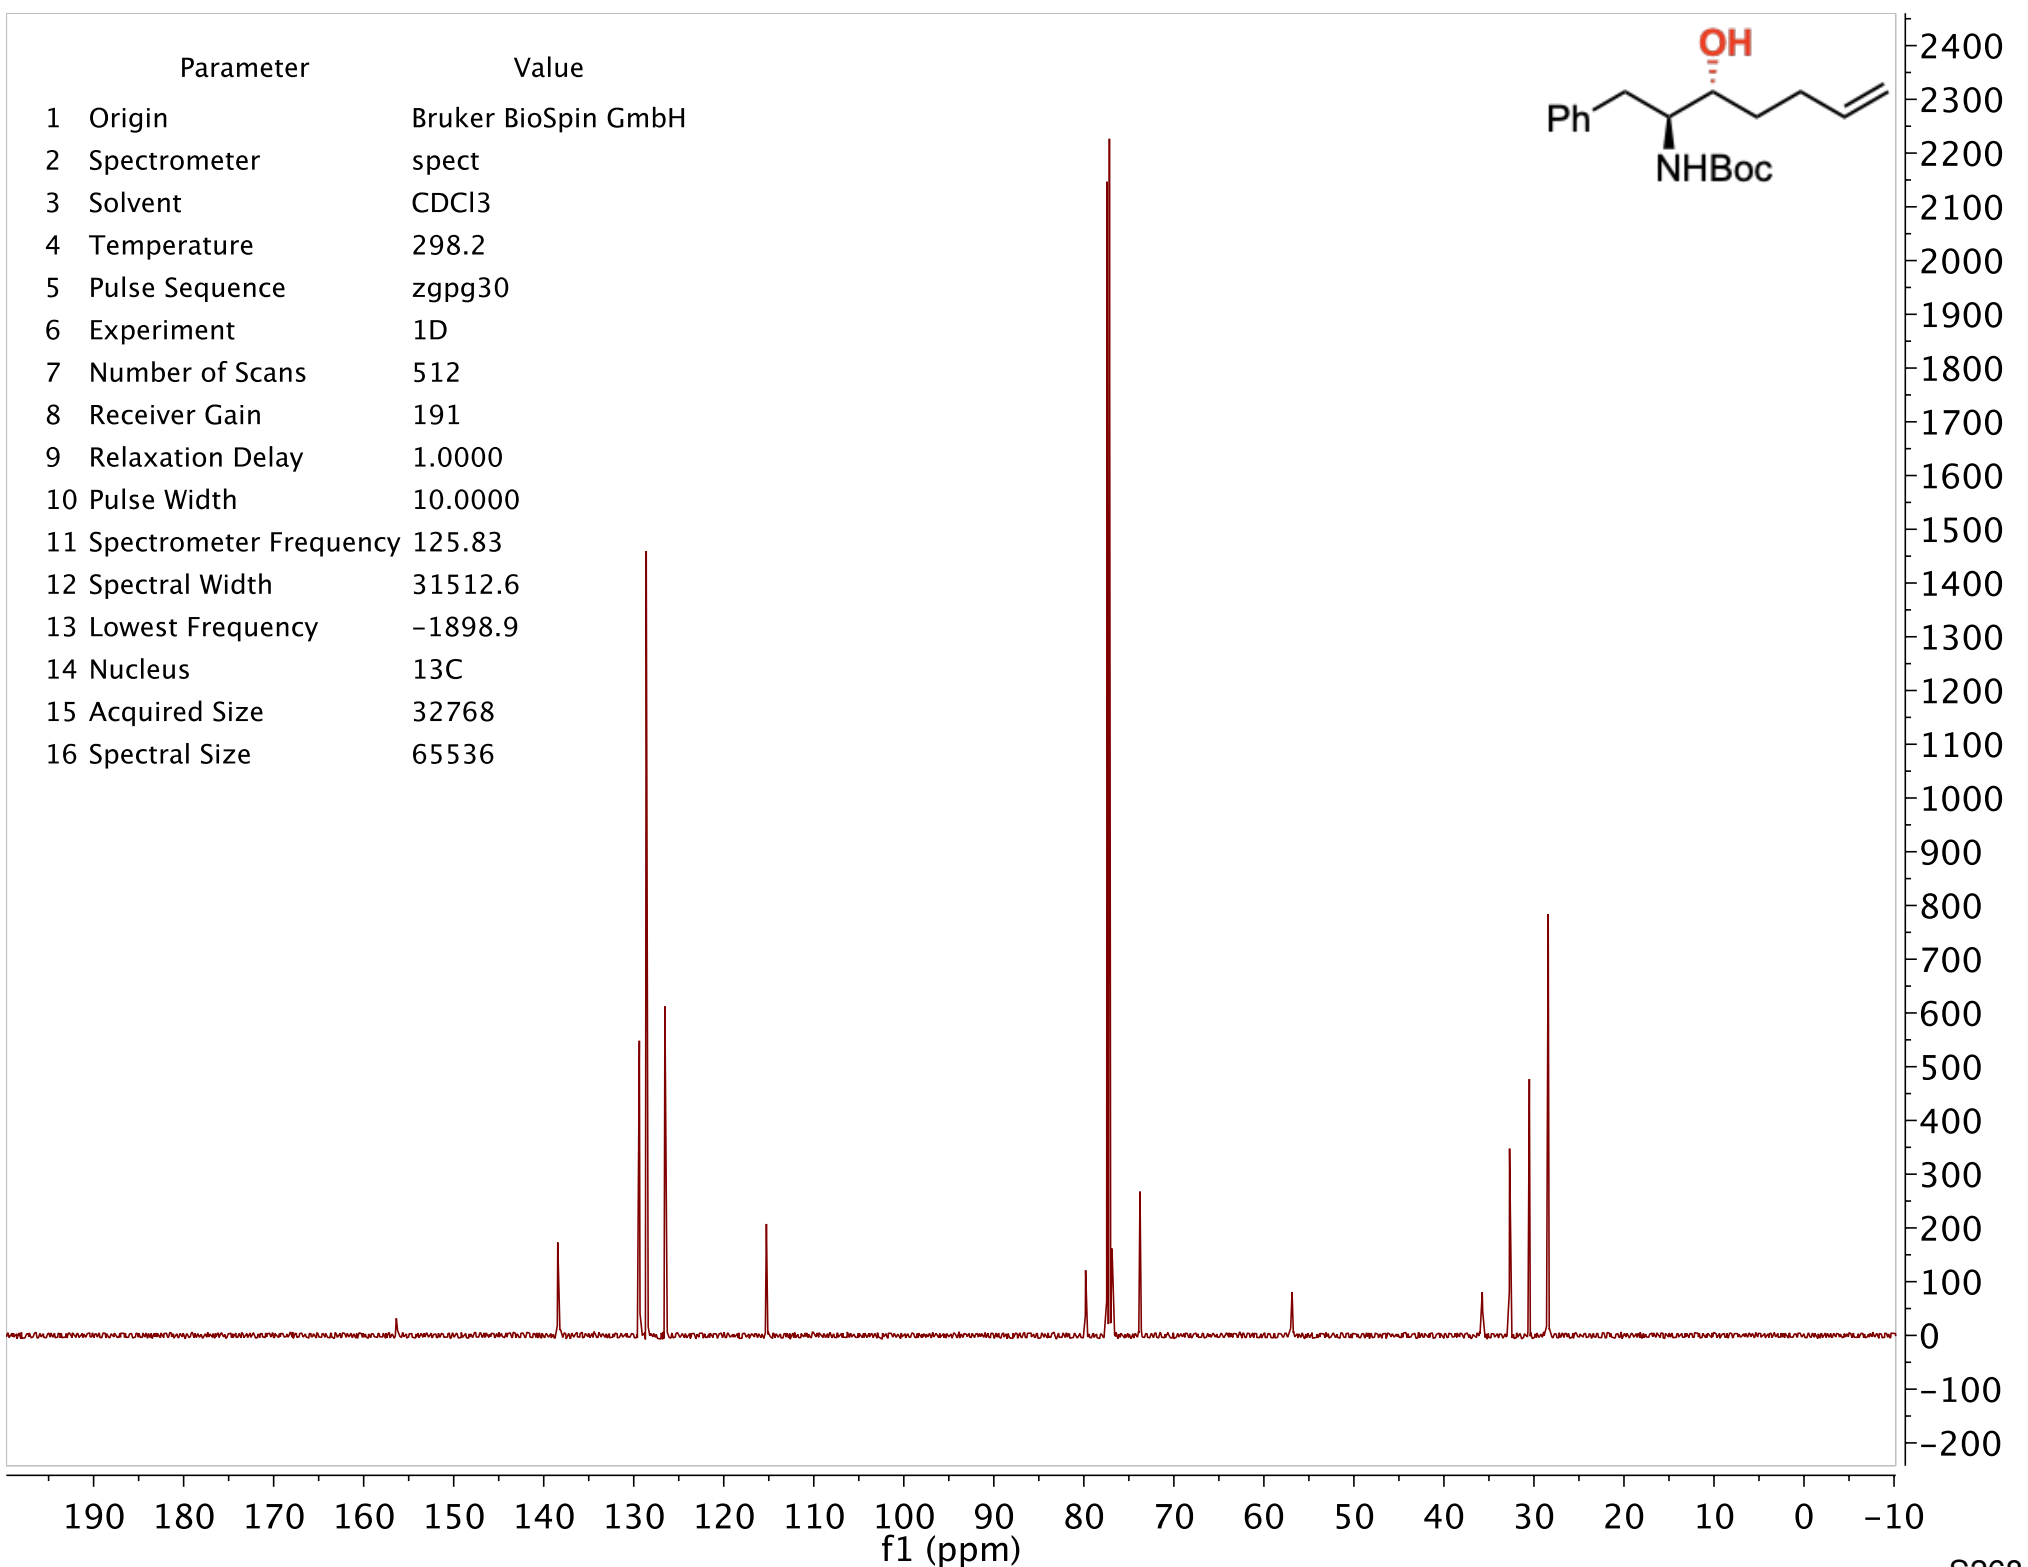

| Parameter                 | Value               |
|---------------------------|---------------------|
| 1 Origin                  | Bruker BioSpin GmbH |
| 2 Spectrometer            | spect               |
| 3 Solvent                 | CDCl3               |
| 4 Temperature             | 298.1               |
| 5 Pulse Sequence          | zg30                |
| 6 Experiment              | 1D                  |
| 7 Number of Scans         | 6                   |
| 8 Receiver Gain           | 62                  |
| 9 Relaxation Delay        | 15.0000             |
| 10 Pulse Width            | 12.0000             |
| 11 Spectrometer Frequency | 500.35              |
| 12 Spectral Width         | 10000.0             |
| 13 Lowest Frequency       | -1921.3             |
| 14 Nucleus                | 1H                  |
| 15 Acquired Size          | 32768               |
| 16 Spectral Size          | 65536               |

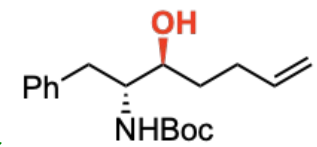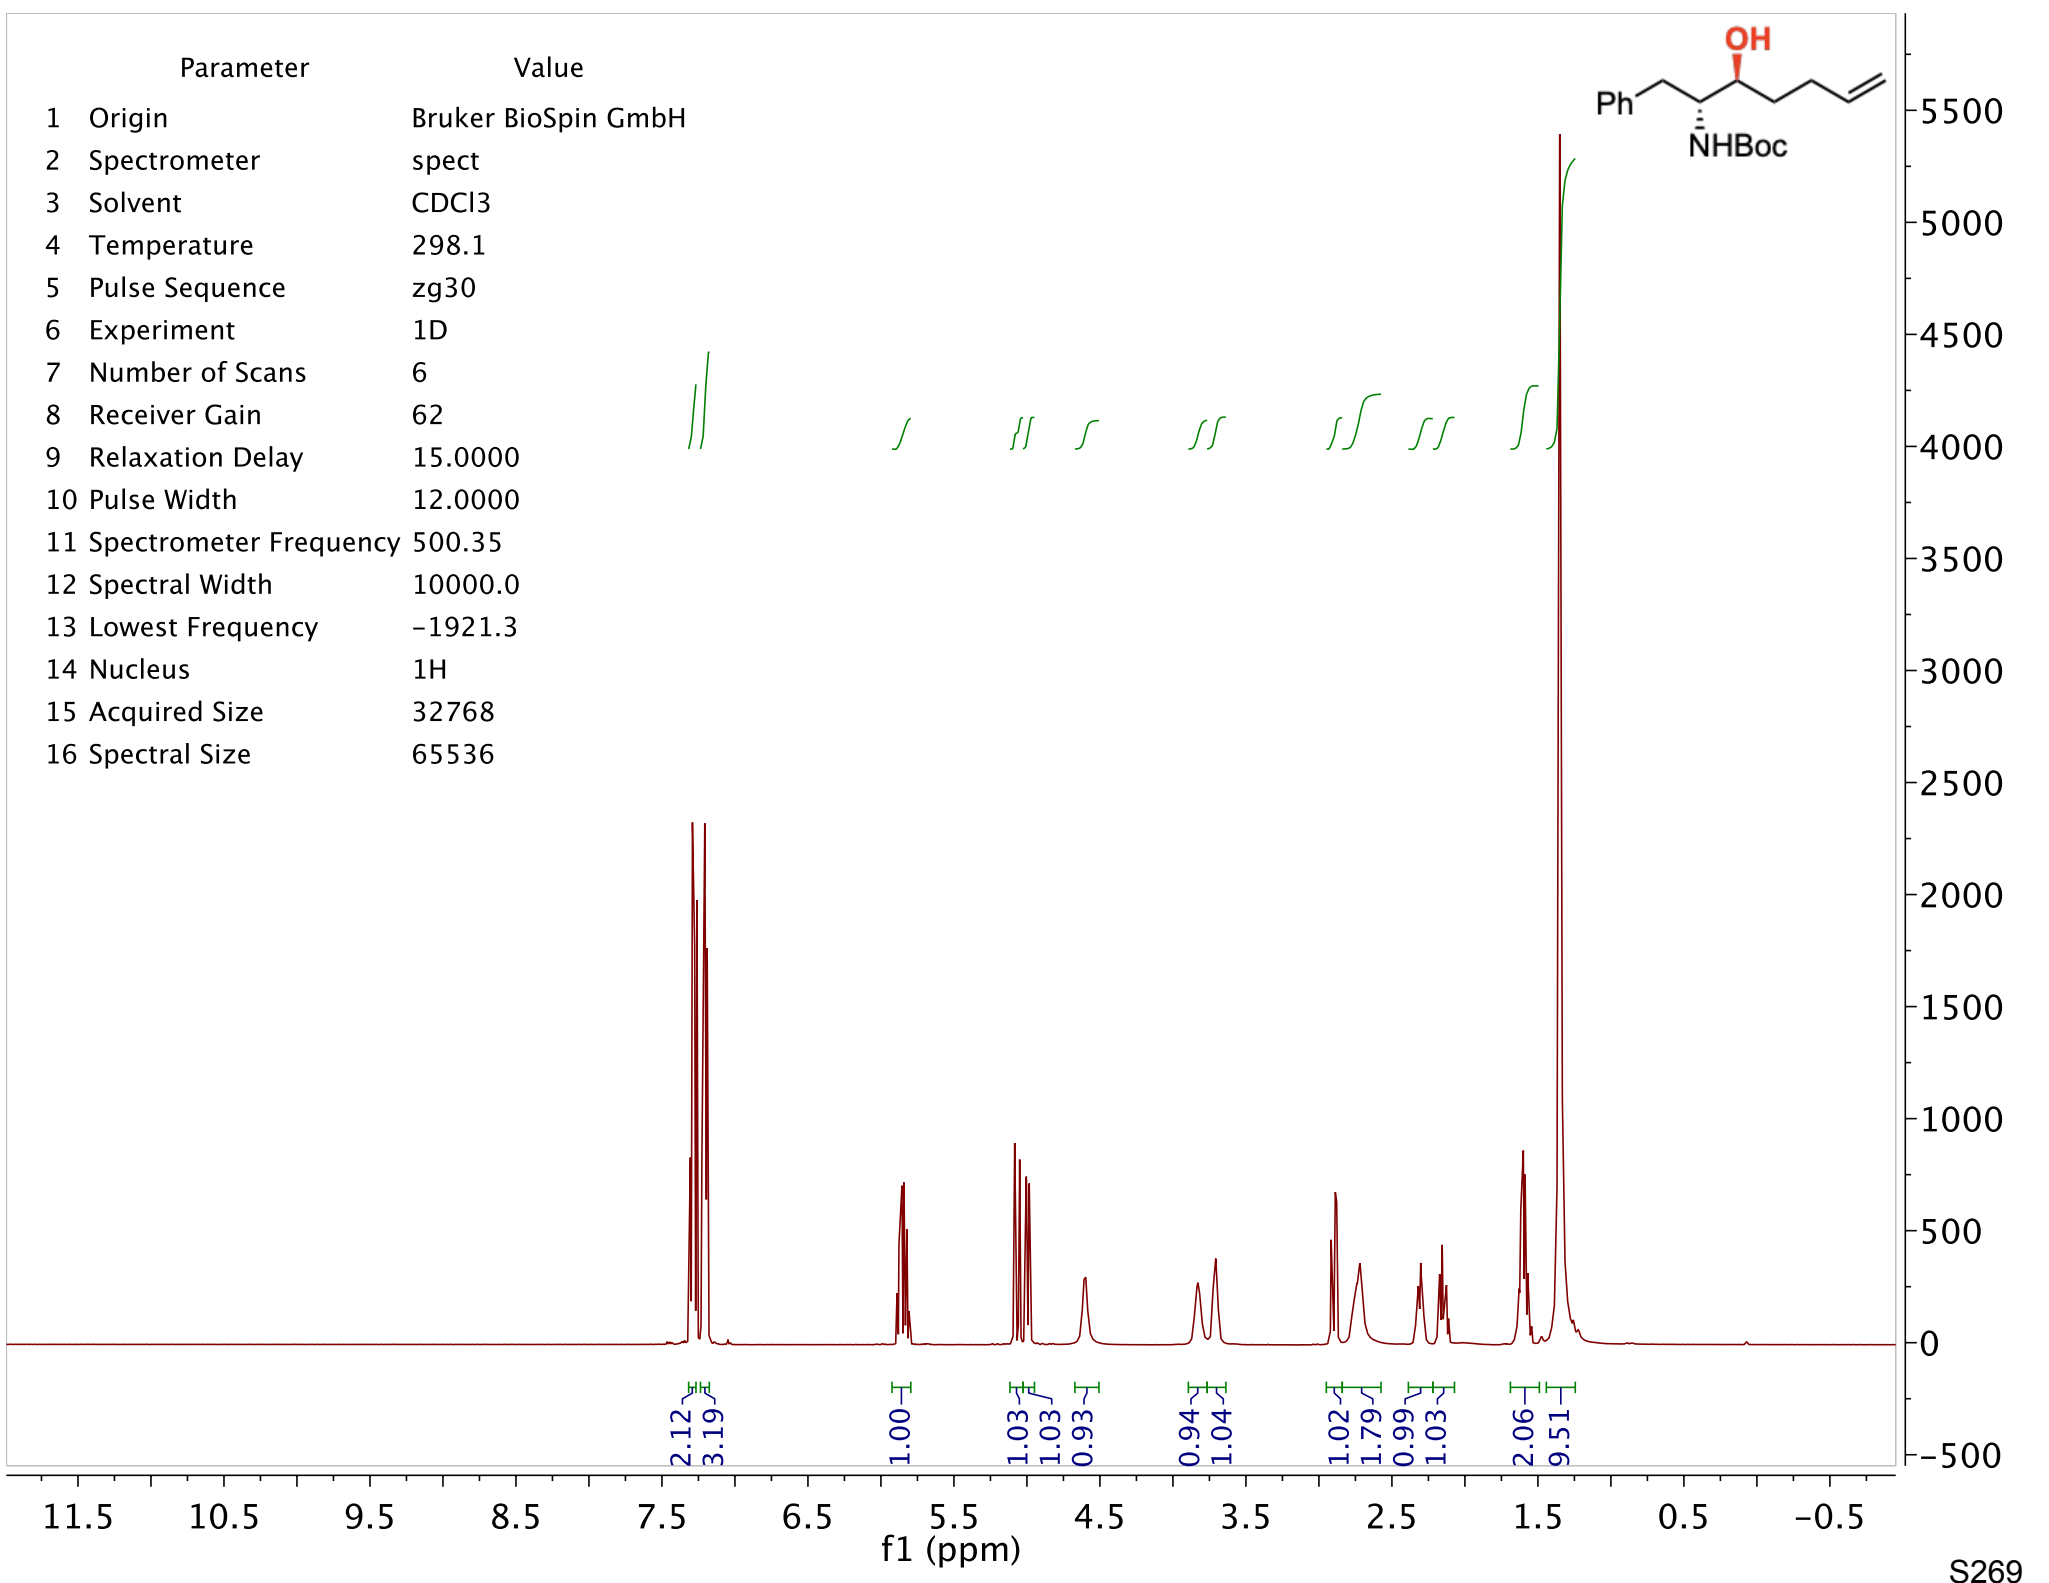

| Parameter                 | Value               |
|---------------------------|---------------------|
| 1 Origin                  | Bruker BioSpin GmbH |
| 2 Spectrometer            | spect               |
| 3 Solvent                 | CDCl3               |
| 4 Temperature             | 298.2               |
| 5 Pulse Sequence          | zgpg30              |
| 6 Experiment              | 1D                  |
| 7 Number of Scans         | 512                 |
| 8 Receiver Gain           | 191                 |
| 9 Relaxation Delay        | 1.0000              |
| 10 Pulse Width            | 10.0000             |
| 11 Spectrometer Frequency | 125.83              |
| 12 Spectral Width         | 31512.6             |
| 13 Lowest Frequency       | -1898.9             |
| 14 Nucleus                | 13C                 |
| 15 Acquired Size          | 32768               |
| 16 Spectral Size          | 65536               |

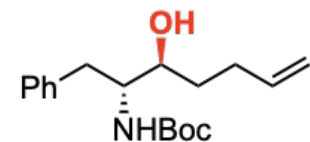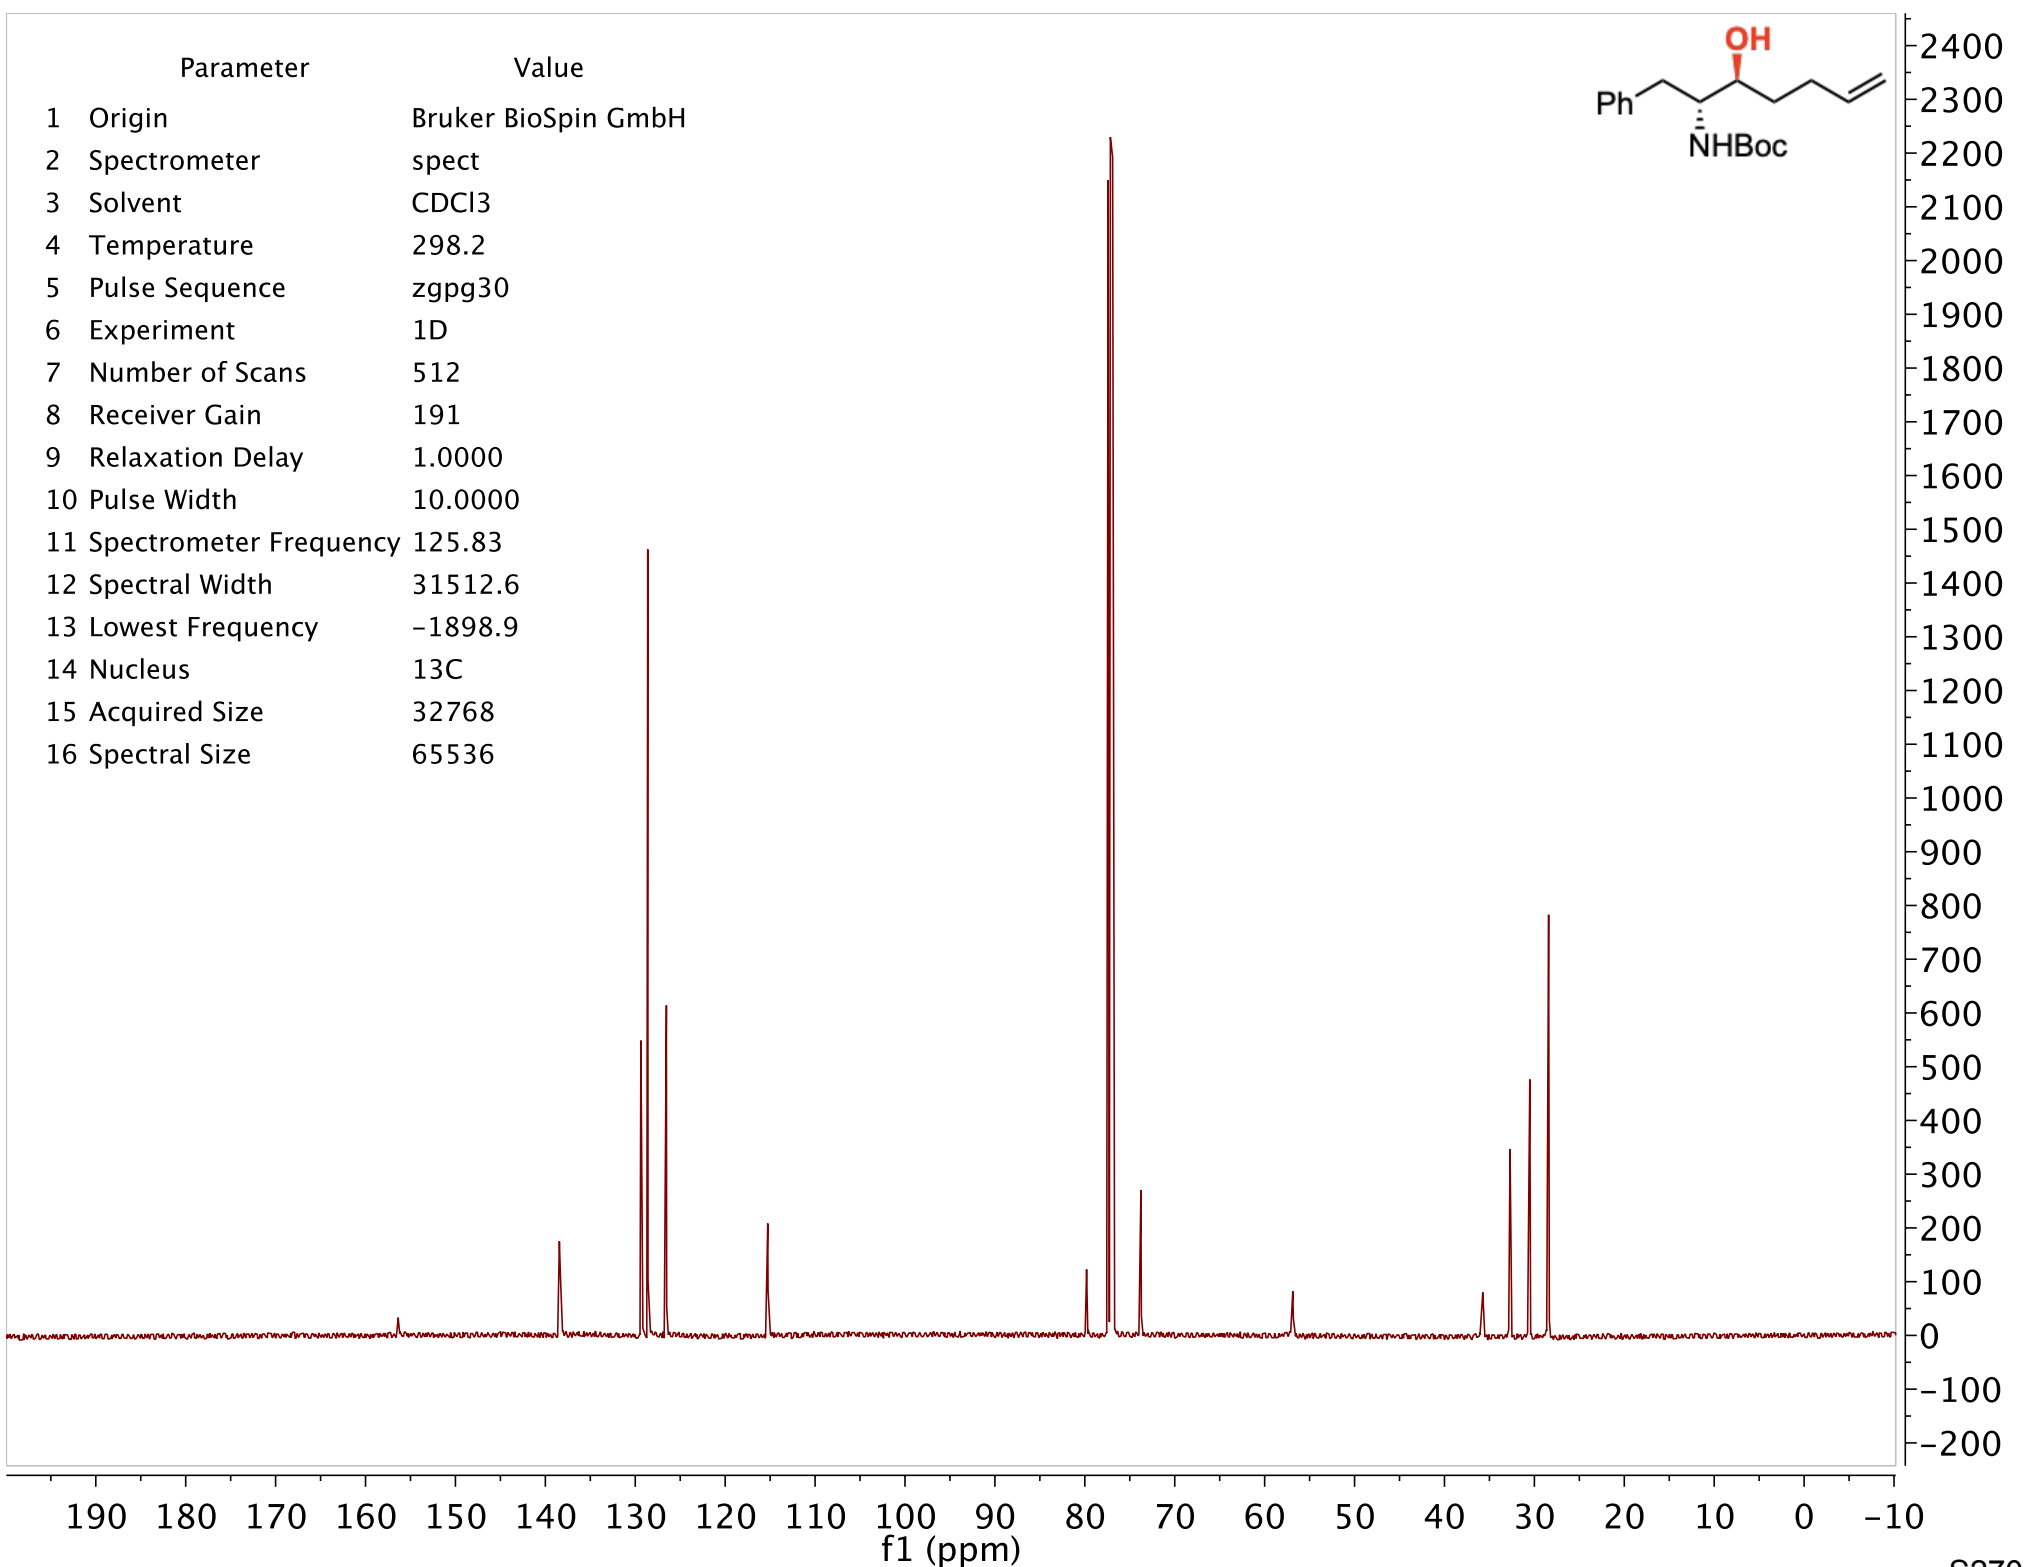



| Parameter                 | Value               |
|---------------------------|---------------------|
| 1 Origin                  | Bruker BioSpin GmbH |
| 2 Spectrometer            | spect               |
| 3 Solvent                 | CDCl3               |
| 4 Temperature             | 296.2               |
| 5 Pulse Sequence          | zg30                |
| 6 Experiment              | 1D                  |
| 7 Number of Scans         | 4                   |
| 8 Receiver Gain           | 30                  |
| 9 Relaxation Delay        | 15.0000             |
| 10 Pulse Width            | 12.0000             |
| 11 Spectrometer Frequency | 500.35              |
| 12 Spectral Width         | 10000.0             |
| 13 Lowest Frequency       | -1922.8             |
| 14 Nucleus                | 1H                  |
| 15 Acquired Size          | 32768               |
| 16 Spectral Size          | 65536               |

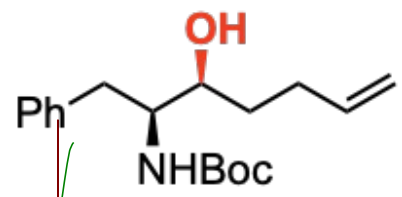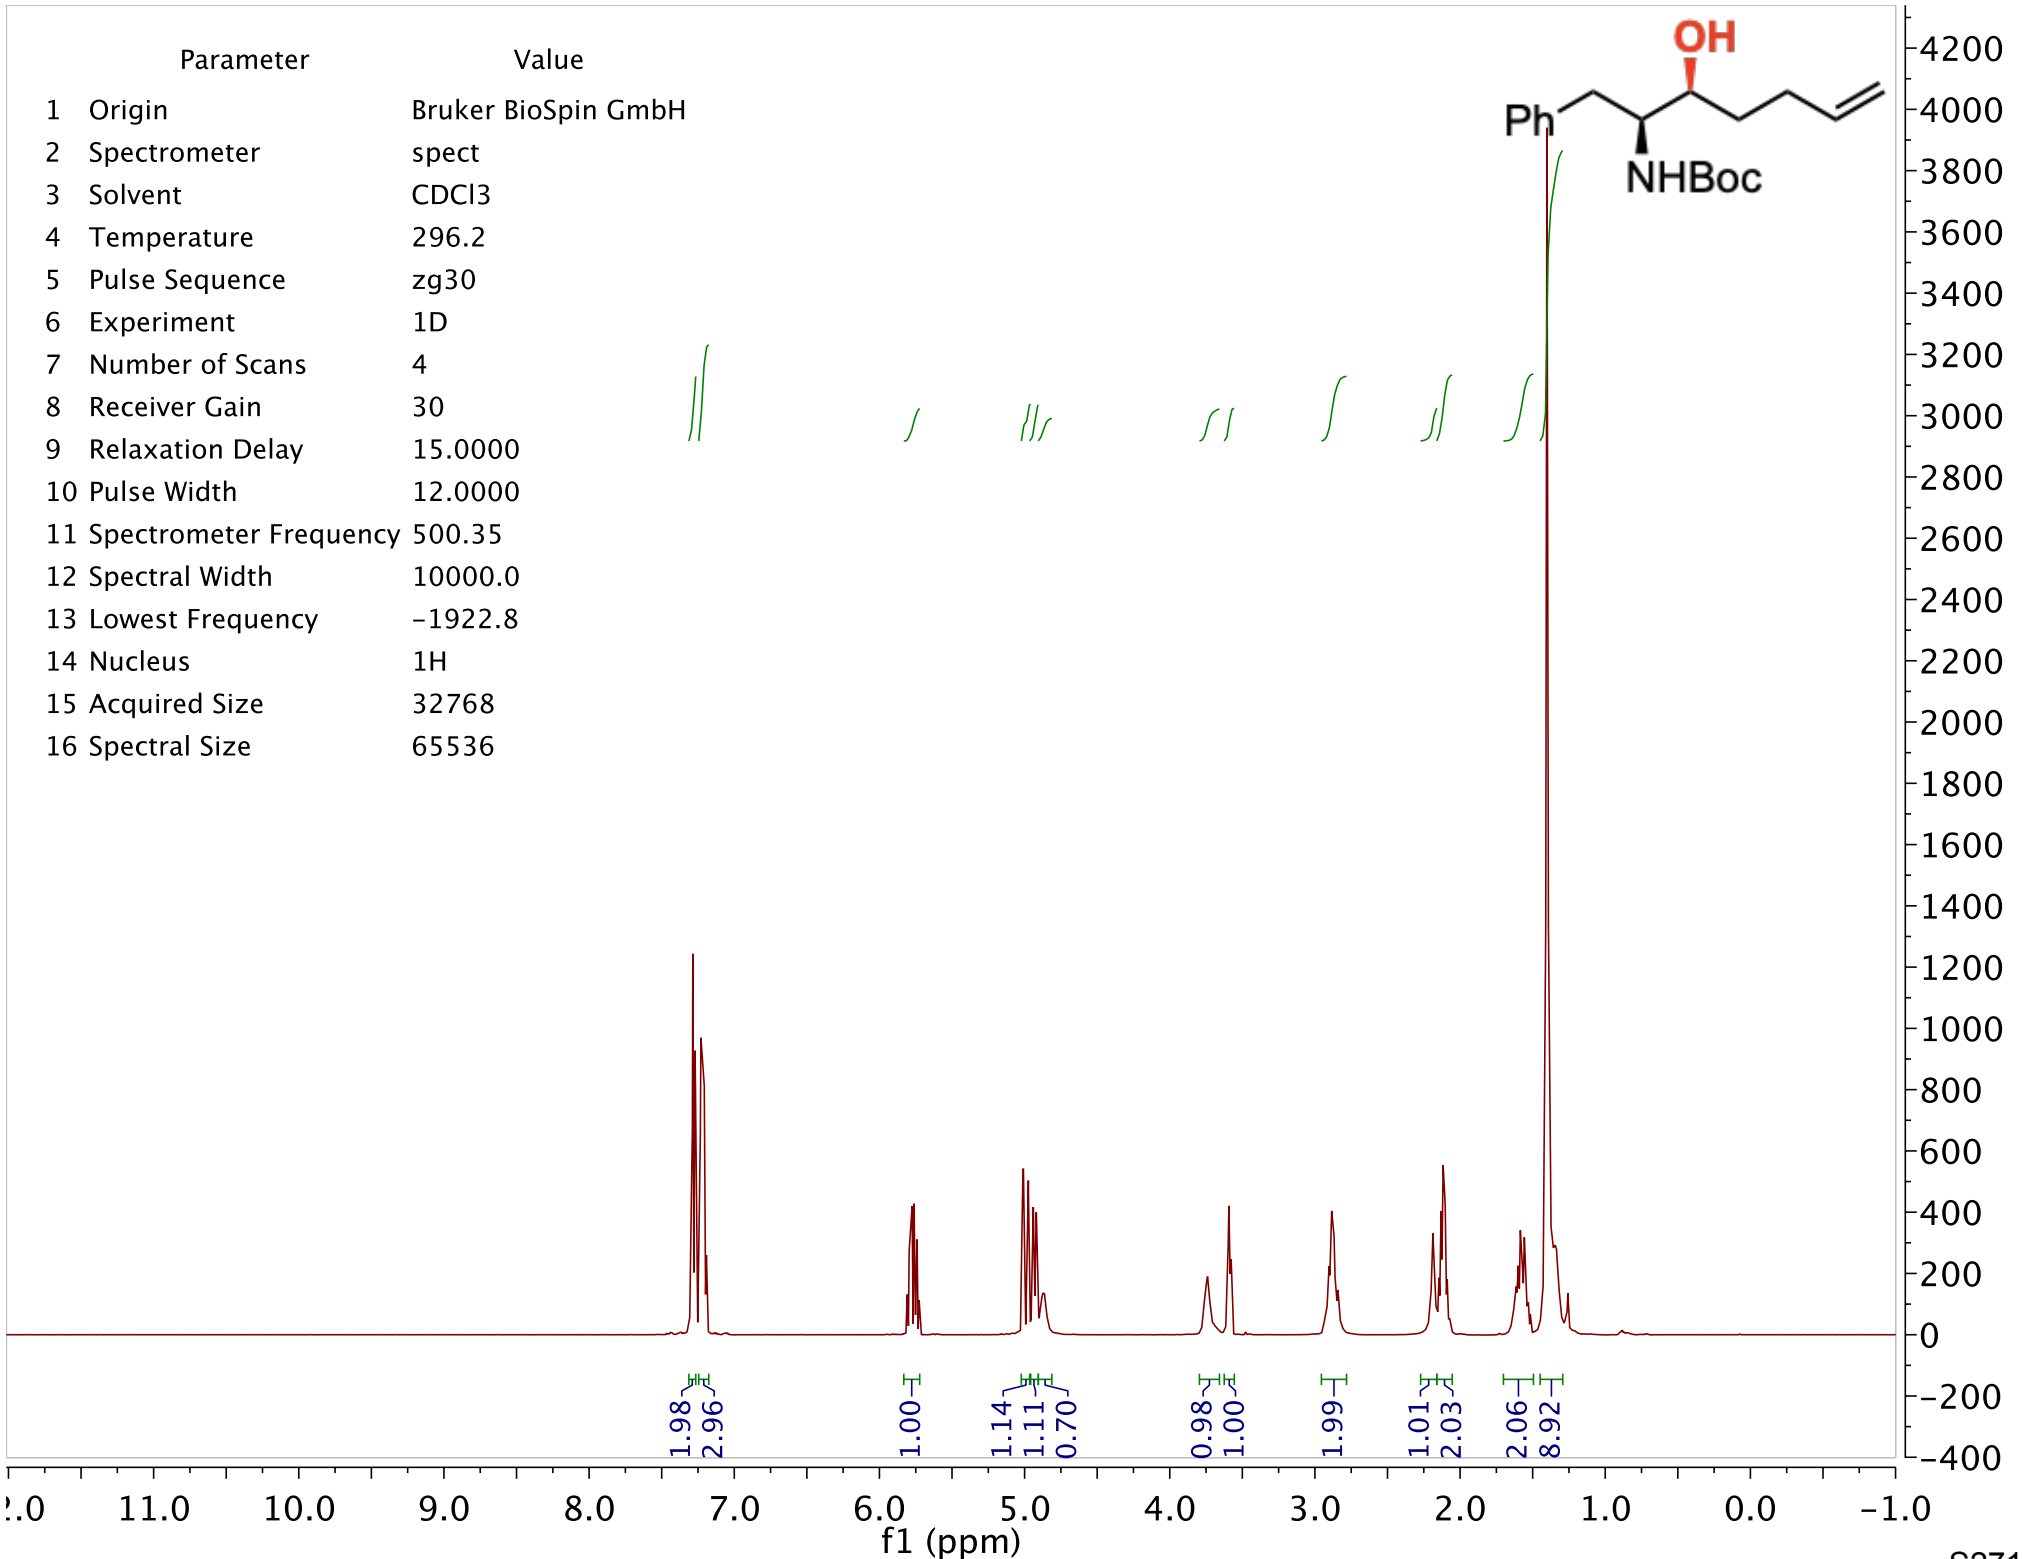

| Parameter                 | Value               |
|---------------------------|---------------------|
| 1 Origin                  | Bruker BioSpin GmbH |
| 2 Spectrometer            | spect               |
| 3 Solvent                 | CDCl3               |
| 4 Temperature             | 296.1               |
| 5 Pulse Sequence          | zgpg30              |
| 6 Experiment              | 1D                  |
| 7 Number of Scans         | 800                 |
| 8 Receiver Gain           | 191                 |
| 9 Relaxation Delay        | 1.0000              |
| 10 Pulse Width            | 10.0000             |
| 11 Spectrometer Frequency | 125.83              |
| 12 Spectral Width         | 31512.6             |
| 13 Lowest Frequency       | -1901.8             |
| 14 Nucleus                | 13C                 |
| 15 Acquired Size          | 32768               |
| 16 Spectral Size          | 65536               |

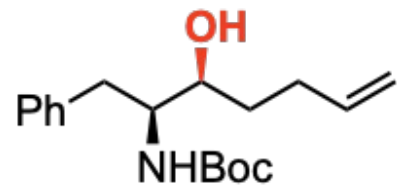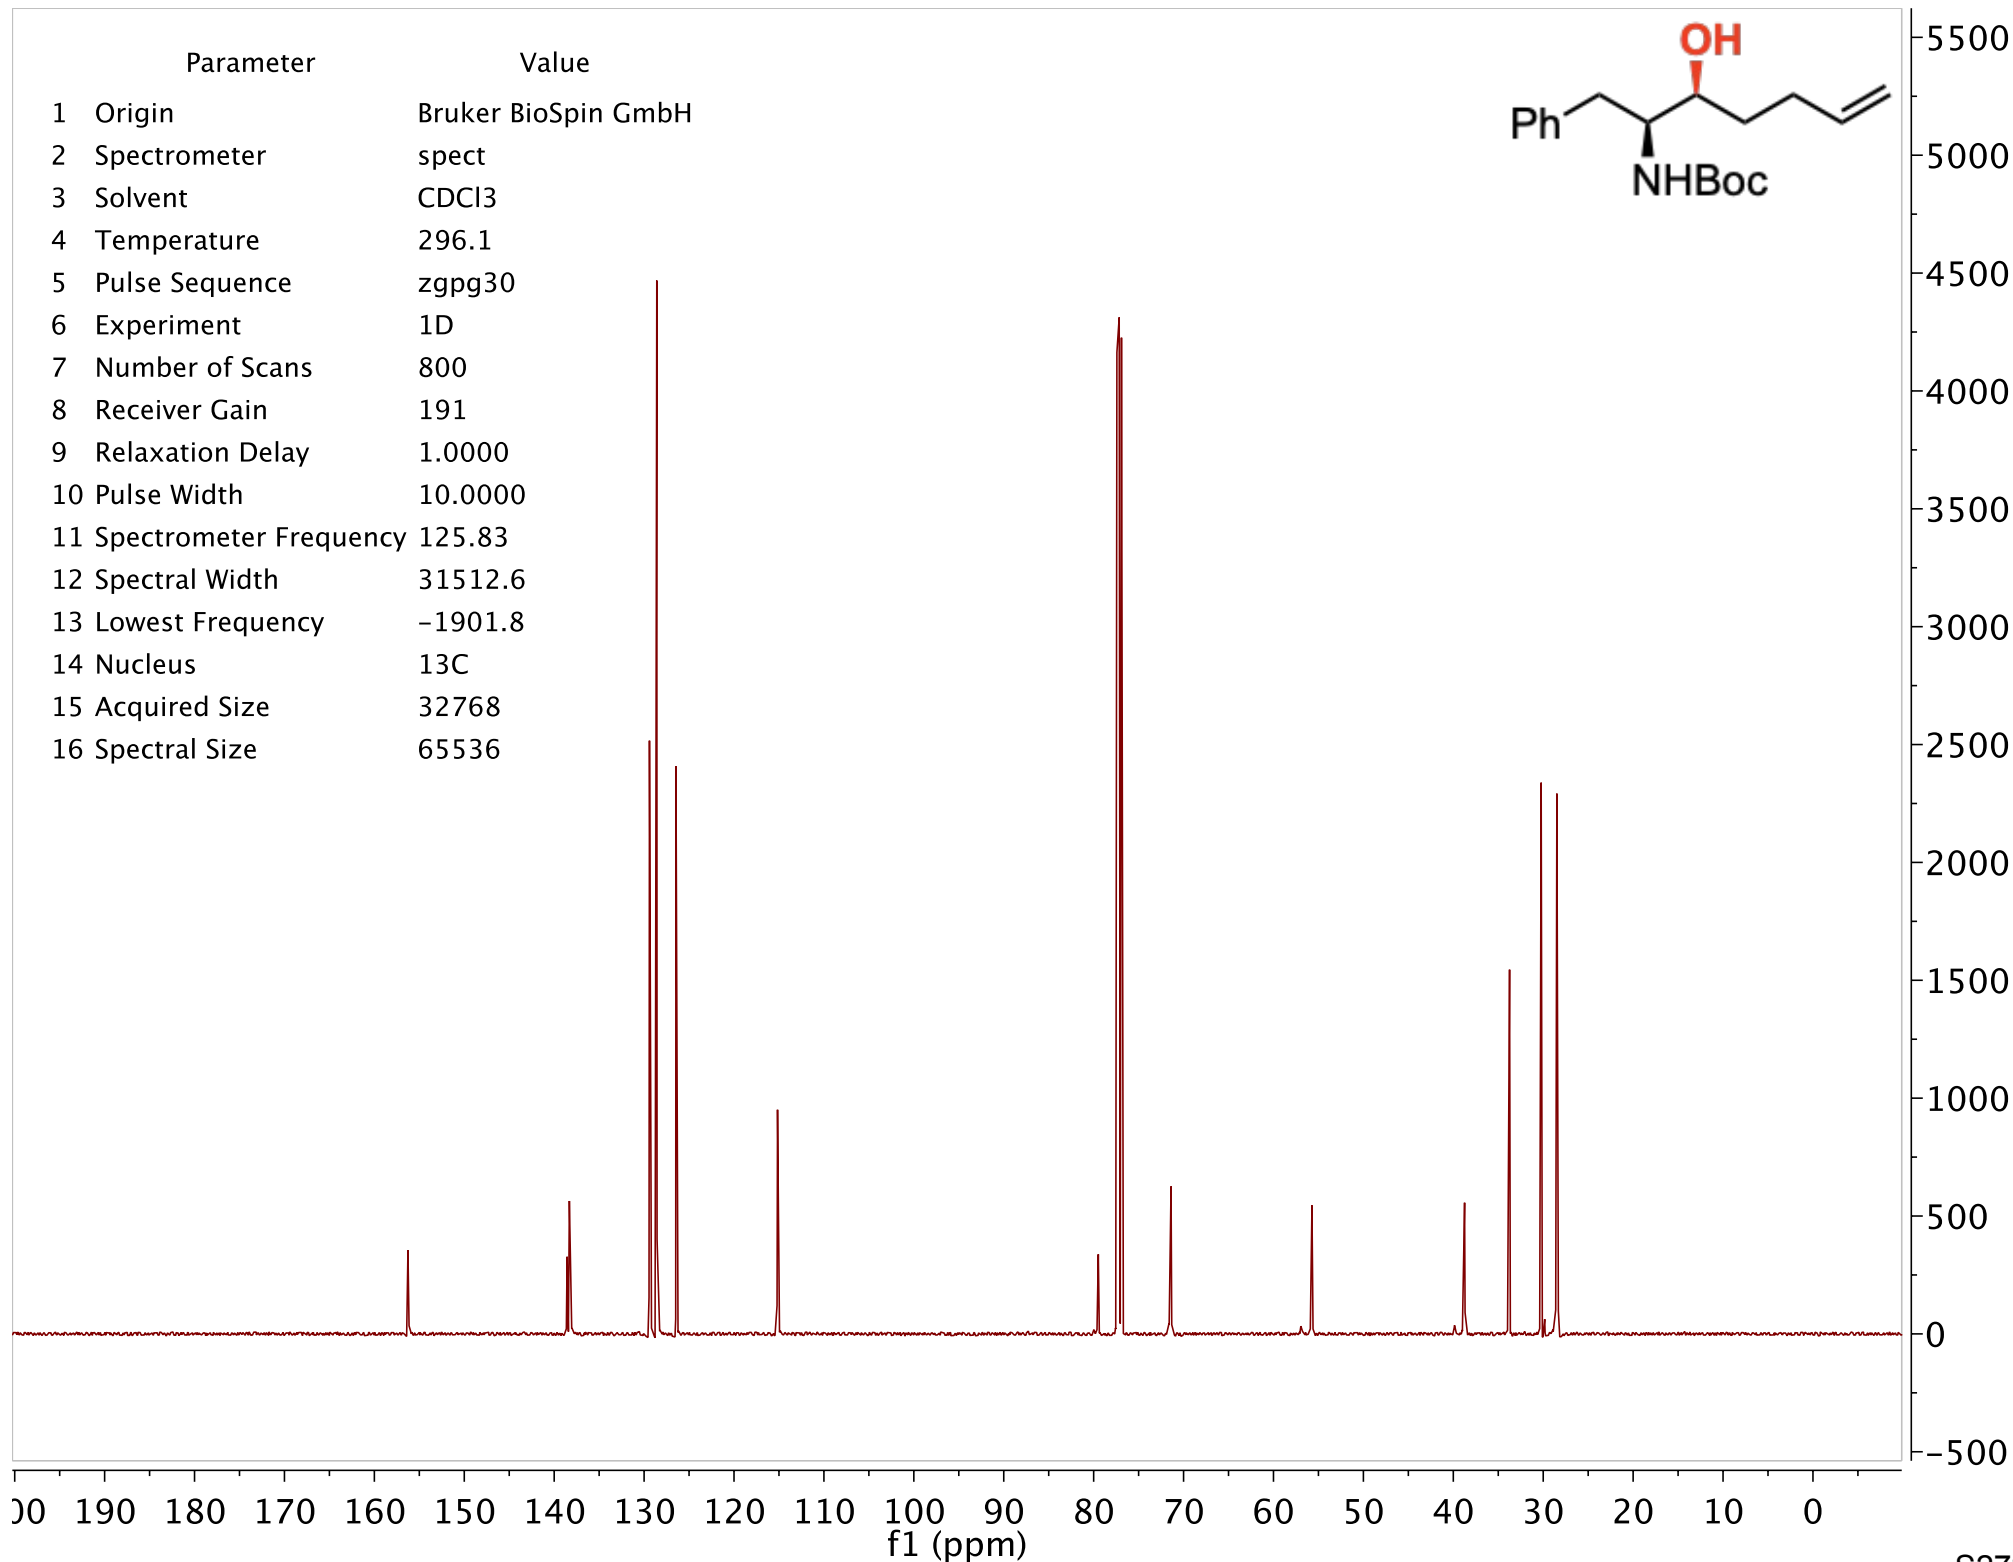

| Parameter                 | Value               |
|---------------------------|---------------------|
| 1 Origin                  | Bruker BioSpin GmbH |
| 2 Spectrometer            | spect               |
| 3 Solvent                 | CDCl3               |
| 4 Temperature             | 296.2               |
| 5 Pulse Sequence          | zg30                |
| 6 Experiment              | 1D                  |
| 7 Number of Scans         | 4                   |
| 8 Receiver Gain           | 30                  |
| 9 Relaxation Delay        | 15.0000             |
| 10 Pulse Width            | 12.0000             |
| 11 Spectrometer Frequency | 500.35              |
| 12 Spectral Width         | 10000.0             |
| 13 Lowest Frequency       | -1922.8             |
| 14 Nucleus                | 1H                  |
| 15 Acquired Size          | 32768               |
| 16 Spectral Size          | 65536               |

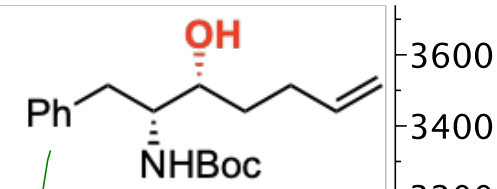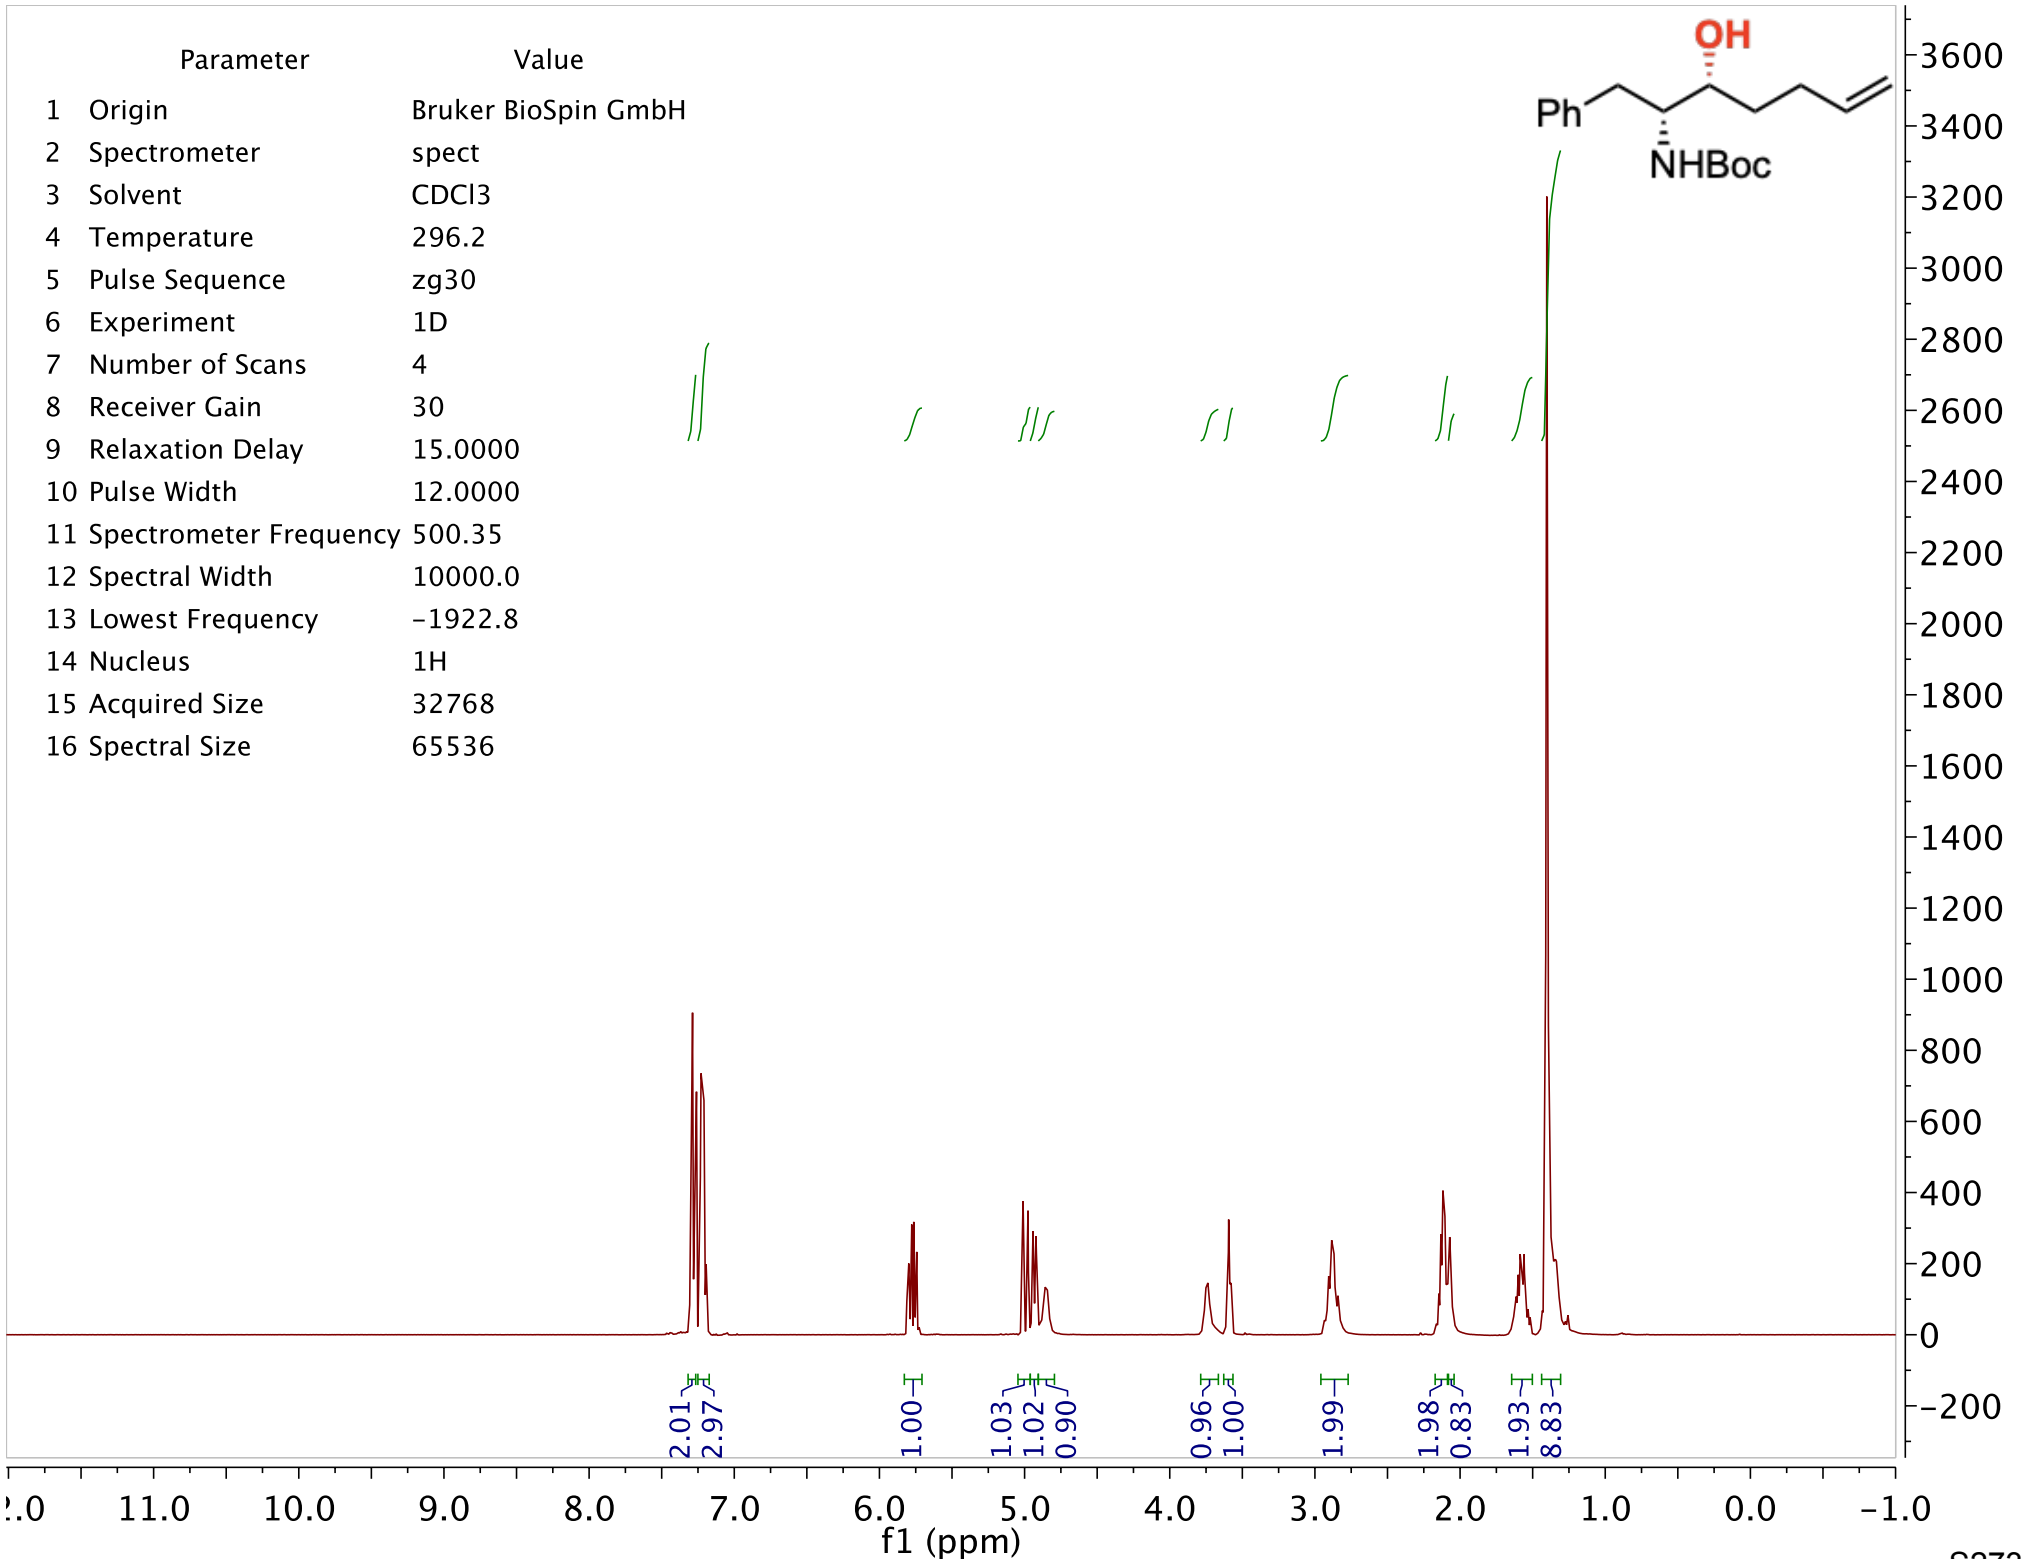

| Parameter                 | Value               |
|---------------------------|---------------------|
| 1 Origin                  | Bruker BioSpin GmbH |
| 2 Spectrometer            | spect               |
| 3 Solvent                 | CDCl3               |
| 4 Temperature             | 296.1               |
| 5 Pulse Sequence          | zgpg30              |
| 6 Experiment              | 1D                  |
| 7 Number of Scans         | 800                 |
| 8 Receiver Gain           | 191                 |
| 9 Relaxation Delay        | 1.0000              |
| 10 Pulse Width            | 10.0000             |
| 11 Spectrometer Frequency | 125.83              |
| 12 Spectral Width         | 31512.6             |
| 13 Lowest Frequency       | -1900.6             |
| 14 Nucleus                | 13C                 |
| 15 Acquired Size          | 32768               |
| 16 Spectral Size          | 65536               |

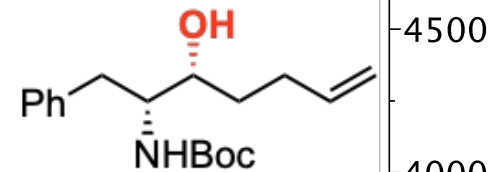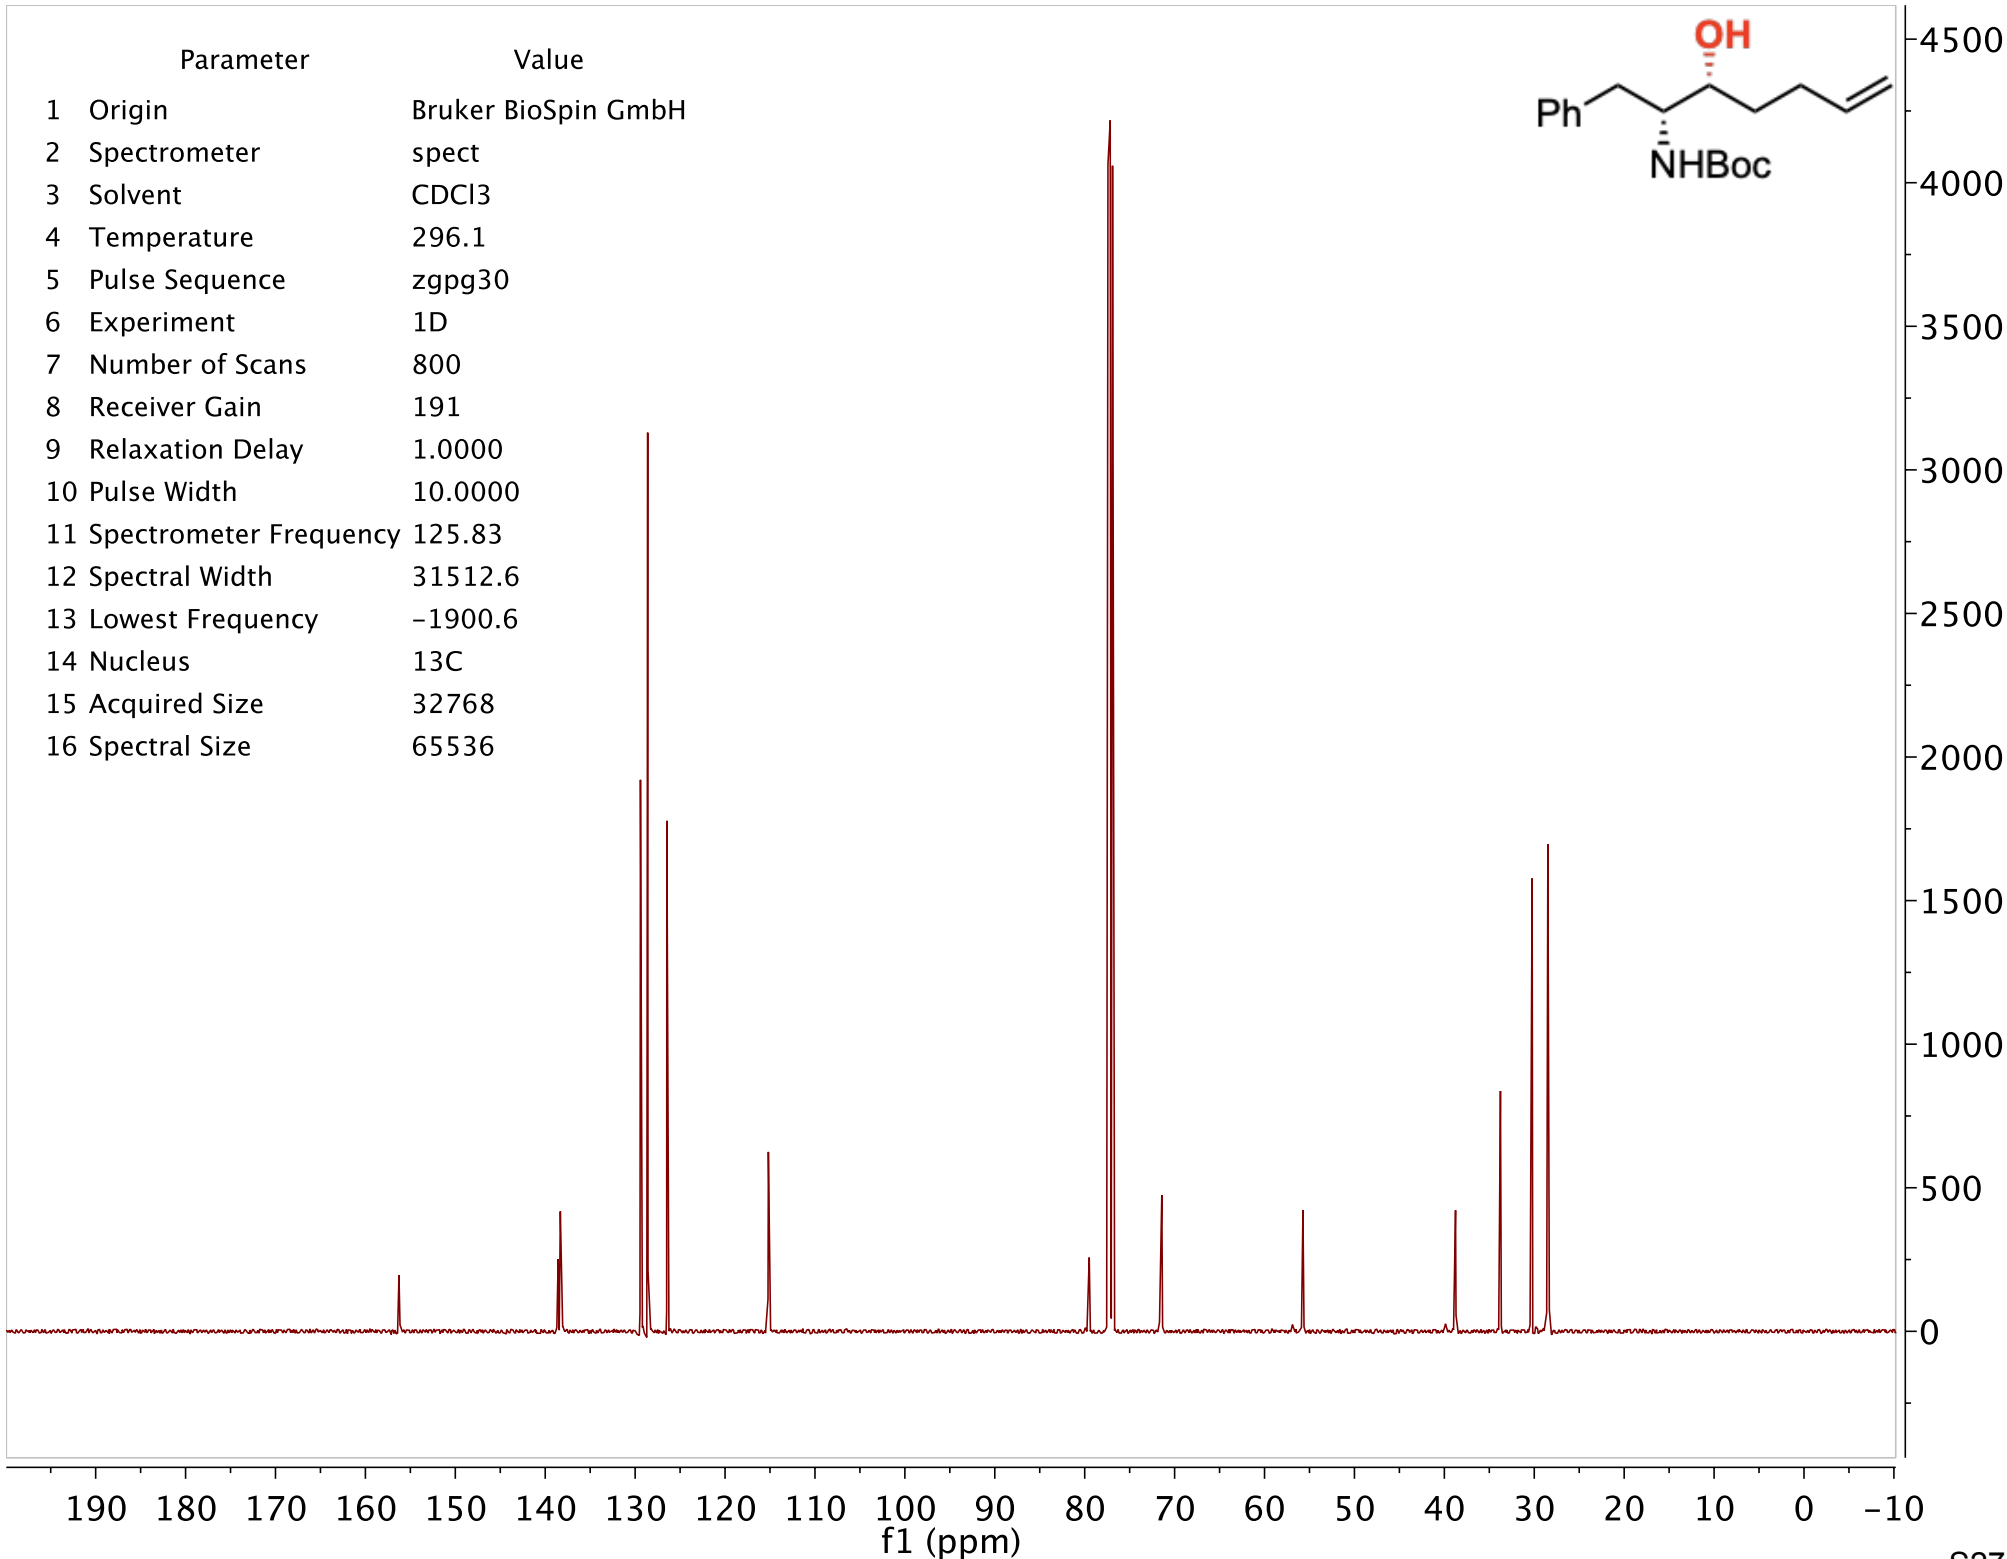

| Parameter                 | Value               |
|---------------------------|---------------------|
| 1 Origin                  | Bruker BioSpin GmbH |
| 2 Spectrometer            | spect               |
| 3 Solvent                 | CDCl3               |
| 4 Temperature             | 298.1               |
| 5 Pulse Sequence          | zg30                |
| 6 Experiment              | 1D                  |
| 7 Number of Scans         | 6                   |
| 8 Receiver Gain           | 62                  |
| 9 Relaxation Delay        | 15.0000             |
| 10 Pulse Width            | 12.0000             |
| 11 Spectrometer Frequency | 500.35              |
| 12 Spectral Width         | 10000.0             |
| 13 Lowest Frequency       | -1921.3             |
| 14 Nucleus                | 1H                  |
| 15 Acquired Size          | 32768               |
| 16 Spectral Size          | 65536               |

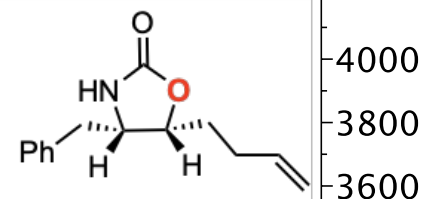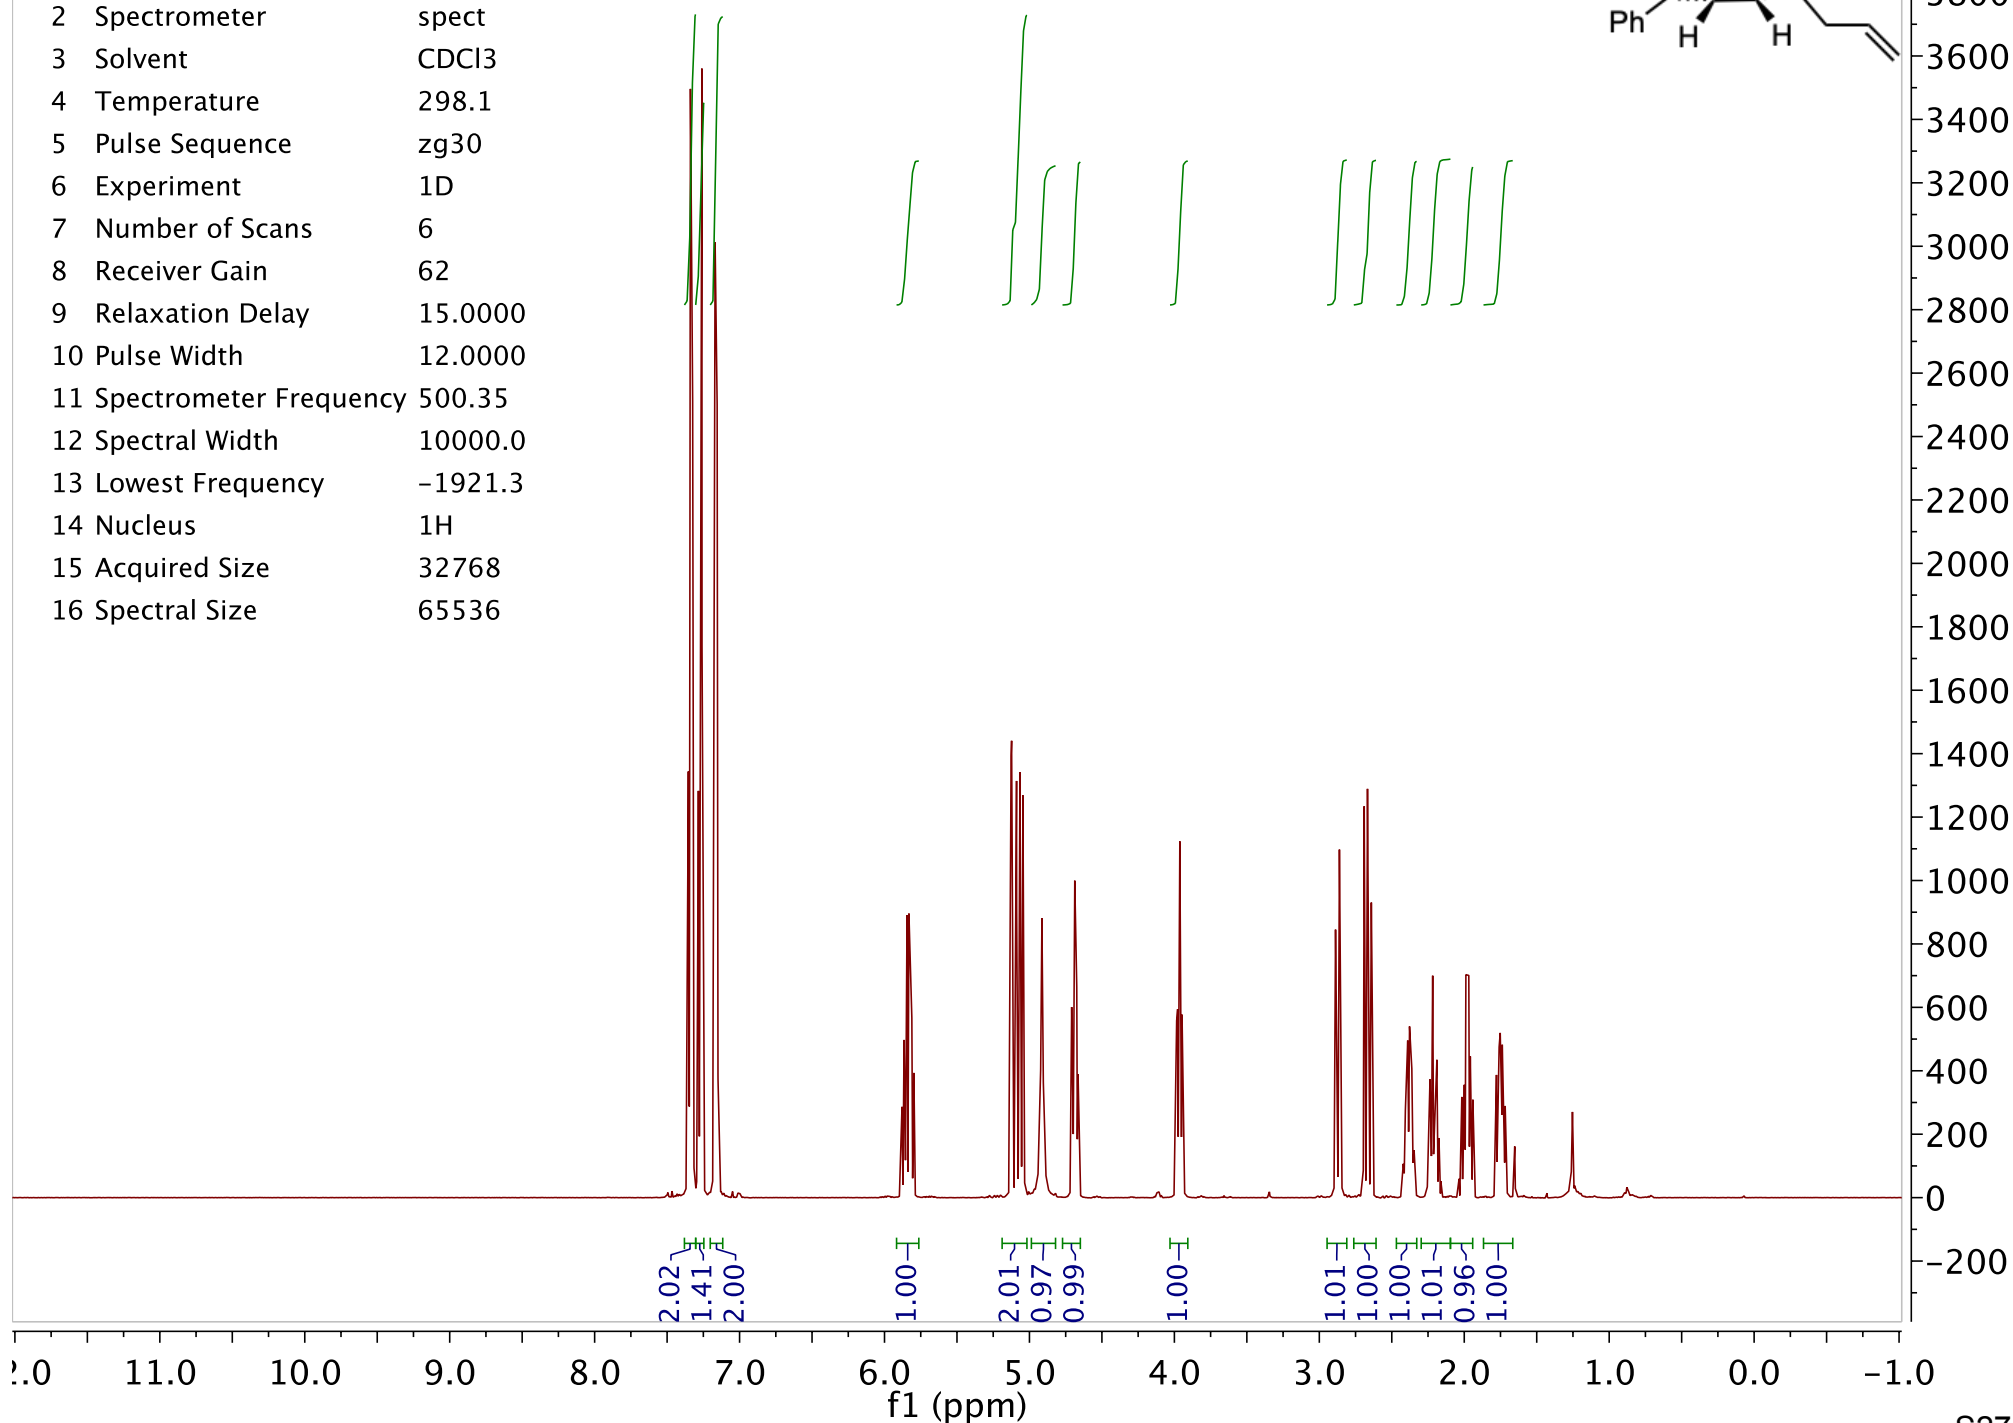

6.0-2.0 ppm

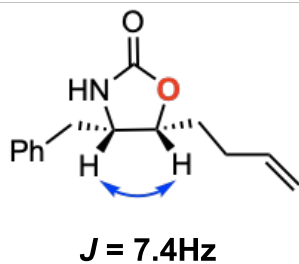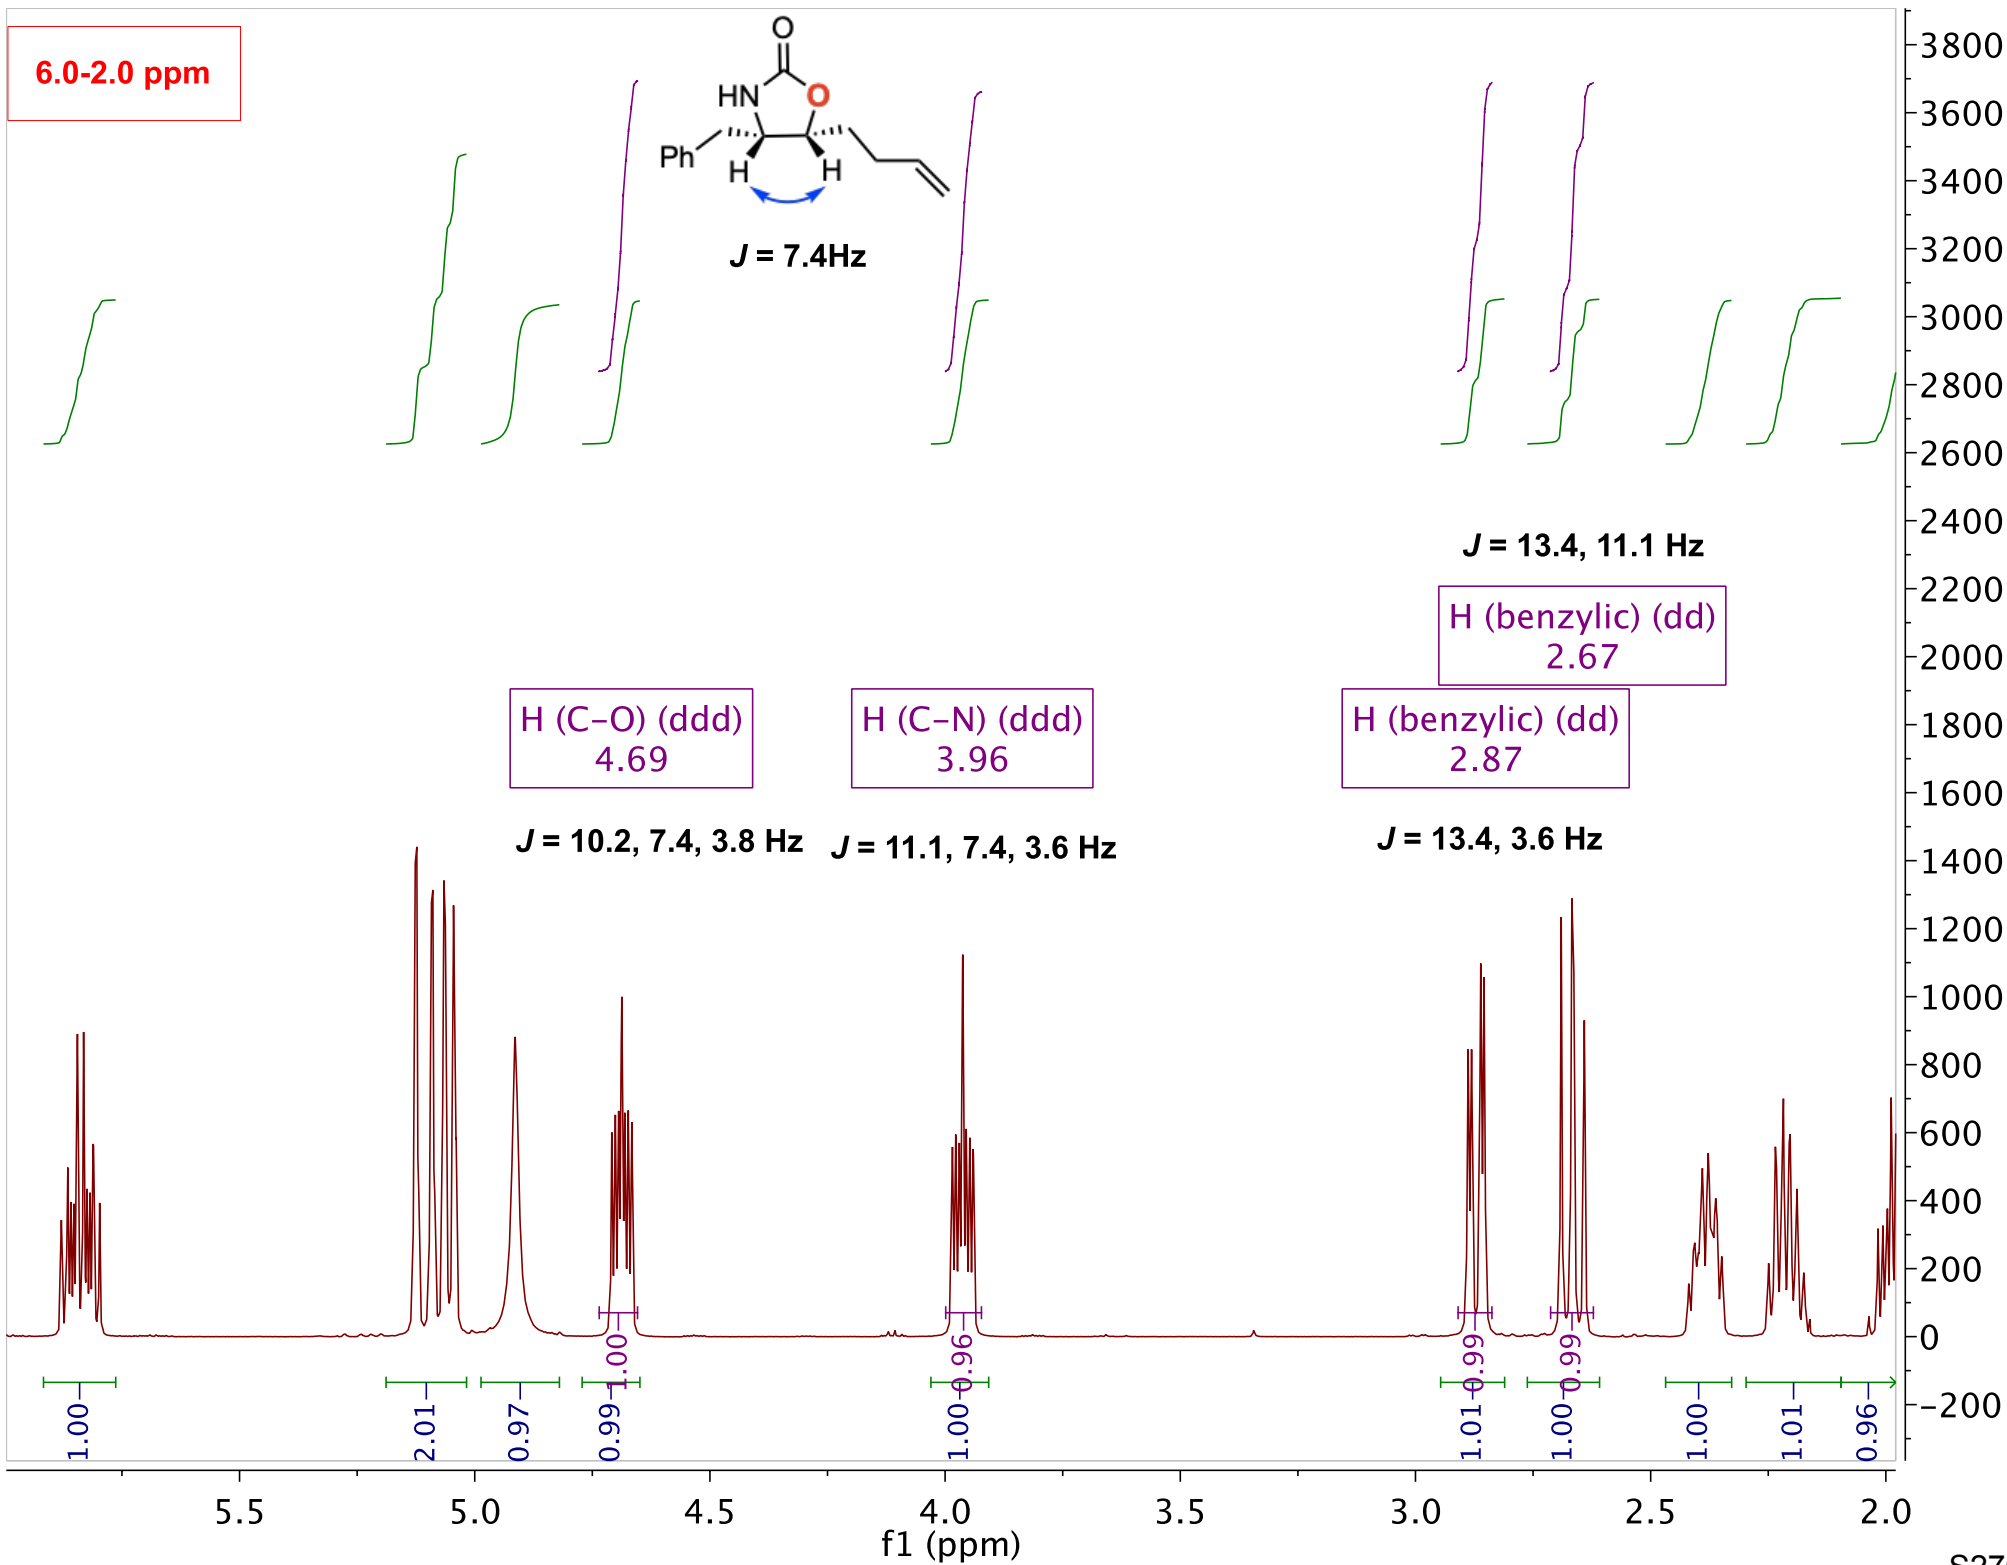

| Parameter                 | Value               |
|---------------------------|---------------------|
| 1 Origin                  | Bruker BioSpin GmbH |
| 2 Spectrometer            | spect               |
| 3 Solvent                 | CDCl3               |
| 4 Temperature             | 298.1               |
| 5 Pulse Sequence          | zgpg30              |
| 6 Experiment              | 1D                  |
| 7 Number of Scans         | 512                 |
| 8 Receiver Gain           | 191                 |
| 9 Relaxation Delay        | 1.0000              |
| 10 Pulse Width            | 10.0000             |
| 11 Spectrometer Frequency | 125.83              |
| 12 Spectral Width         | 31512.6             |
| 13 Lowest Frequency       | -1902.4             |
| 14 Nucleus                | 13C                 |
| 15 Acquired Size          | 32768               |
| 16 Spectral Size          | 65536               |

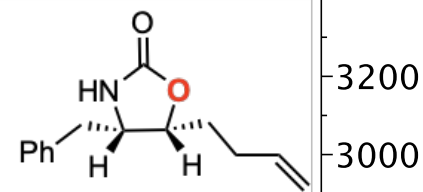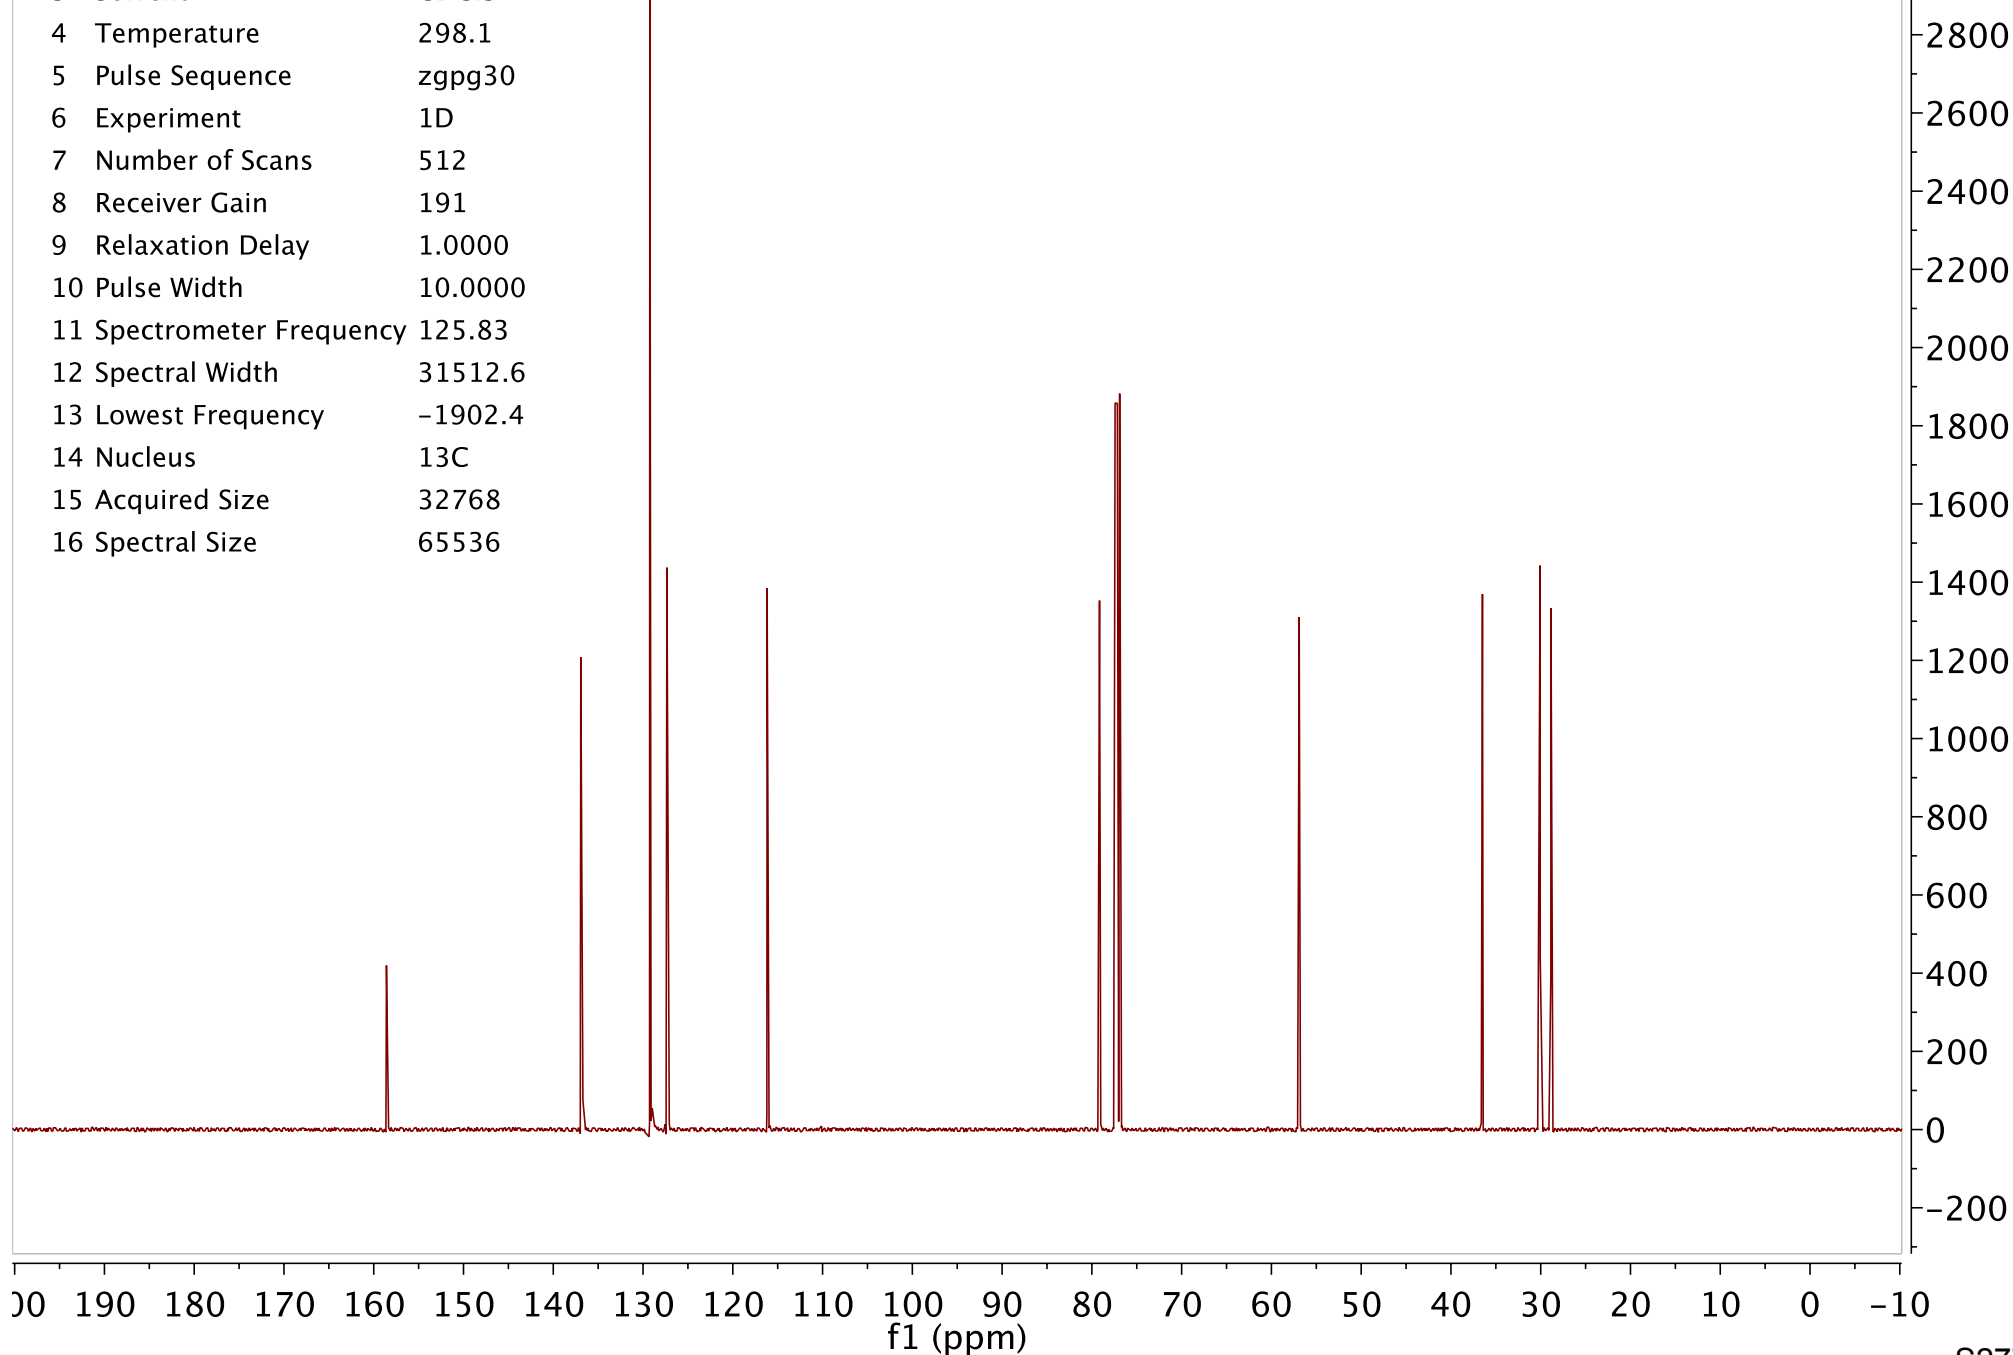

| Parameter                 | Value               |
|---------------------------|---------------------|
| 1 Origin                  | Bruker BioSpin GmbH |
| 2 Spectrometer            | spect               |
| 3 Solvent                 | CDCl3               |
| 4 Temperature             | 298.1               |
| 5 Pulse Sequence          | zg30                |
| 6 Experiment              | 1D                  |
| 7 Number of Scans         | 6                   |
| 8 Receiver Gain           | 55                  |
| 9 Relaxation Delay        | 15.0000             |
| 10 Pulse Width            | 12.0000             |
| 11 Spectrometer Frequency | 500.35              |
| 12 Spectral Width         | 10000.0             |
| 13 Lowest Frequency       | -1921.3             |
| 14 Nucleus                | 1H                  |
| 15 Acquired Size          | 32768               |
| 16 Spectral Size          | 65536               |

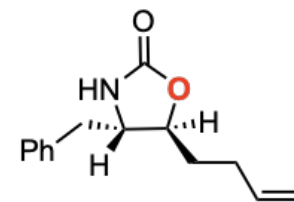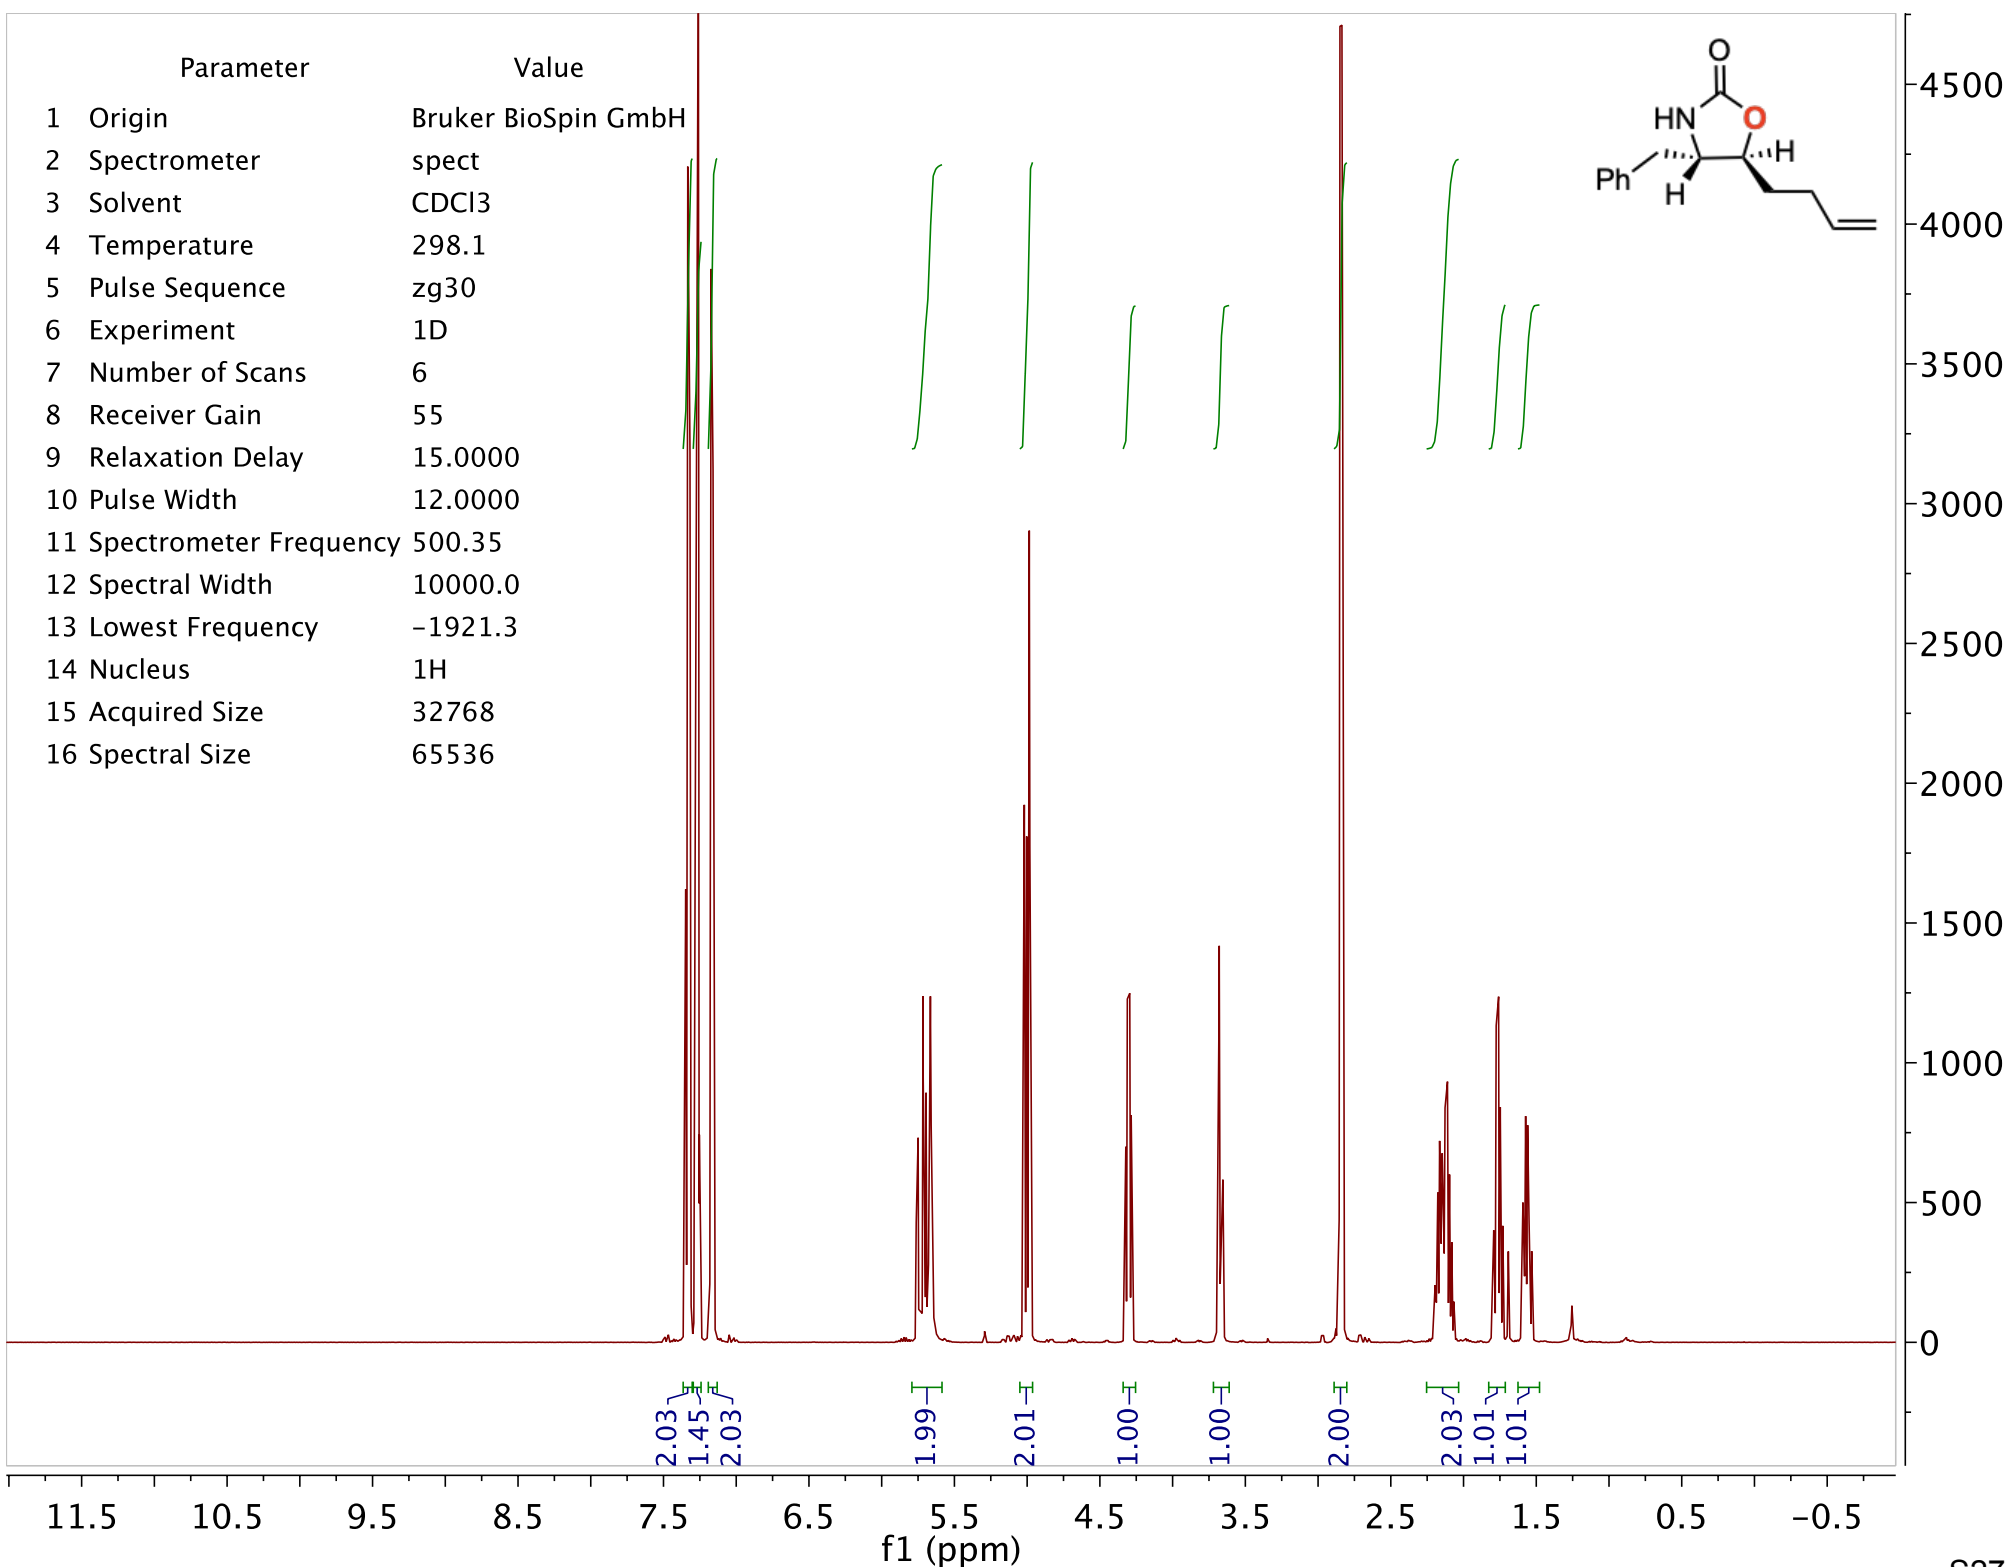



6.0-2.0 ppm

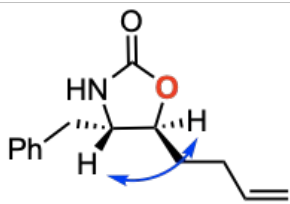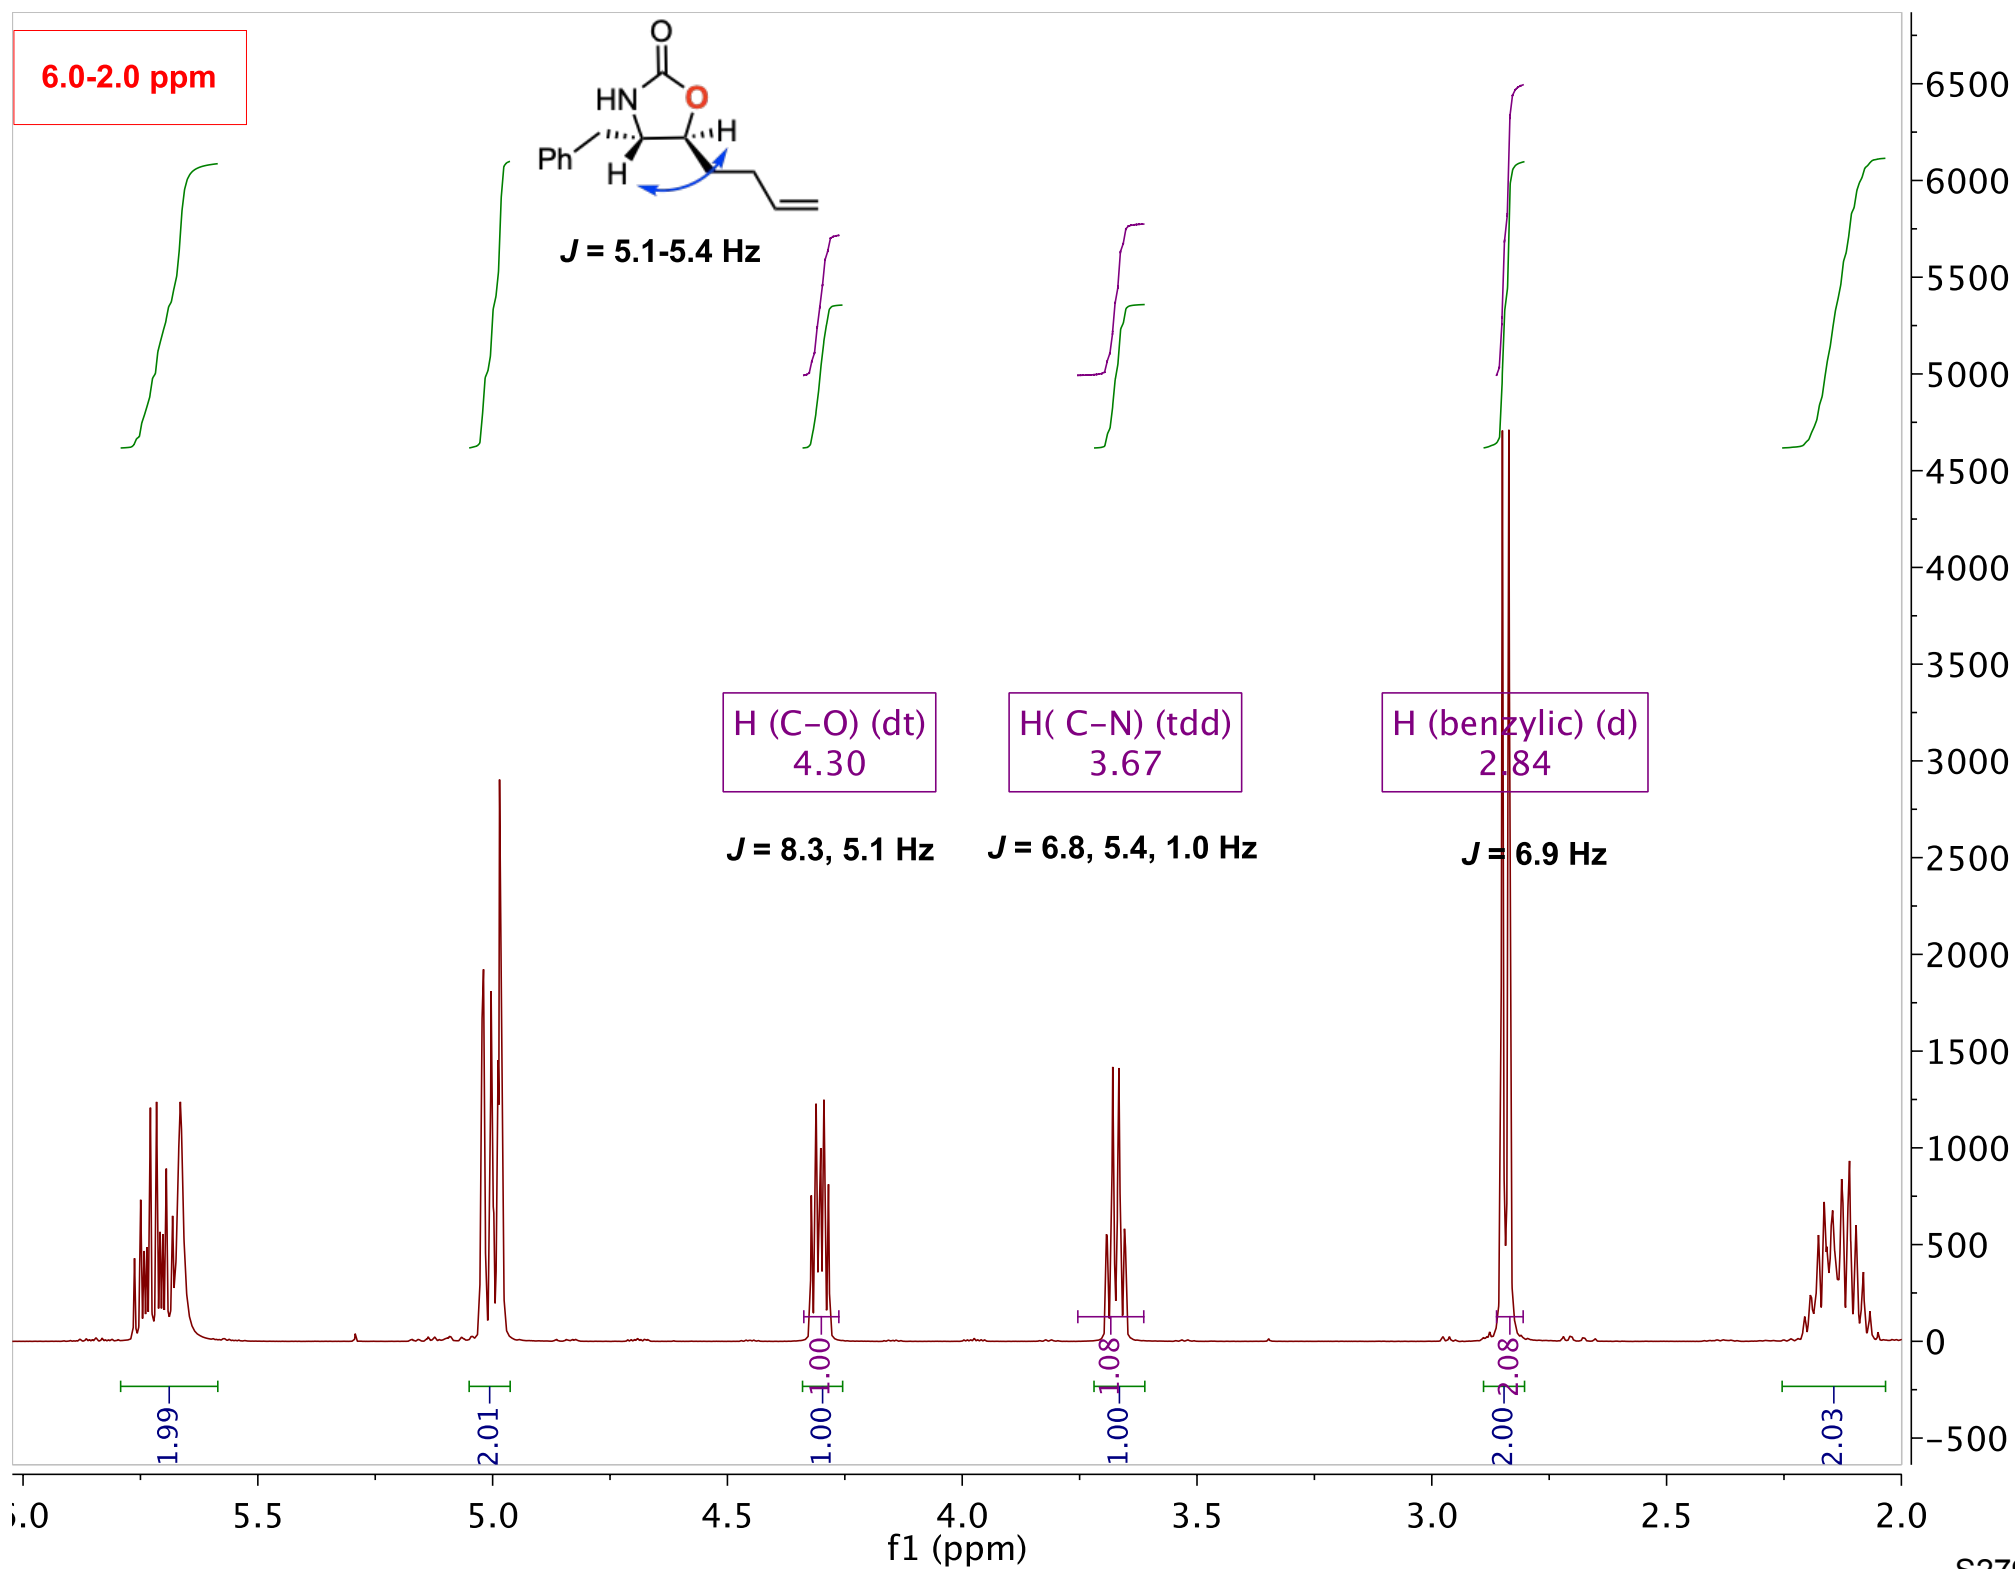

| Parameter                 | Value               |
|---------------------------|---------------------|
| 1 Origin                  | Bruker BioSpin GmbH |
| 2 Spectrometer            | spect               |
| 3 Solvent                 | CDCl3               |
| 4 Temperature             | 298.1               |
| 5 Pulse Sequence          | zgpg30              |
| 6 Experiment              | 1D                  |
| 7 Number of Scans         | 512                 |
| 8 Receiver Gain           | 191                 |
| 9 Relaxation Delay        | 1.0000              |
| 10 Pulse Width            | 10.0000             |
| 11 Spectrometer Frequency | 125.83              |
| 12 Spectral Width         | 31512.6             |
| 13 Lowest Frequency       | -1902.1             |
| 14 Nucleus                | 13C                 |
| 15 Acquired Size          | 32768               |
| 16 Spectral Size          | 65536               |

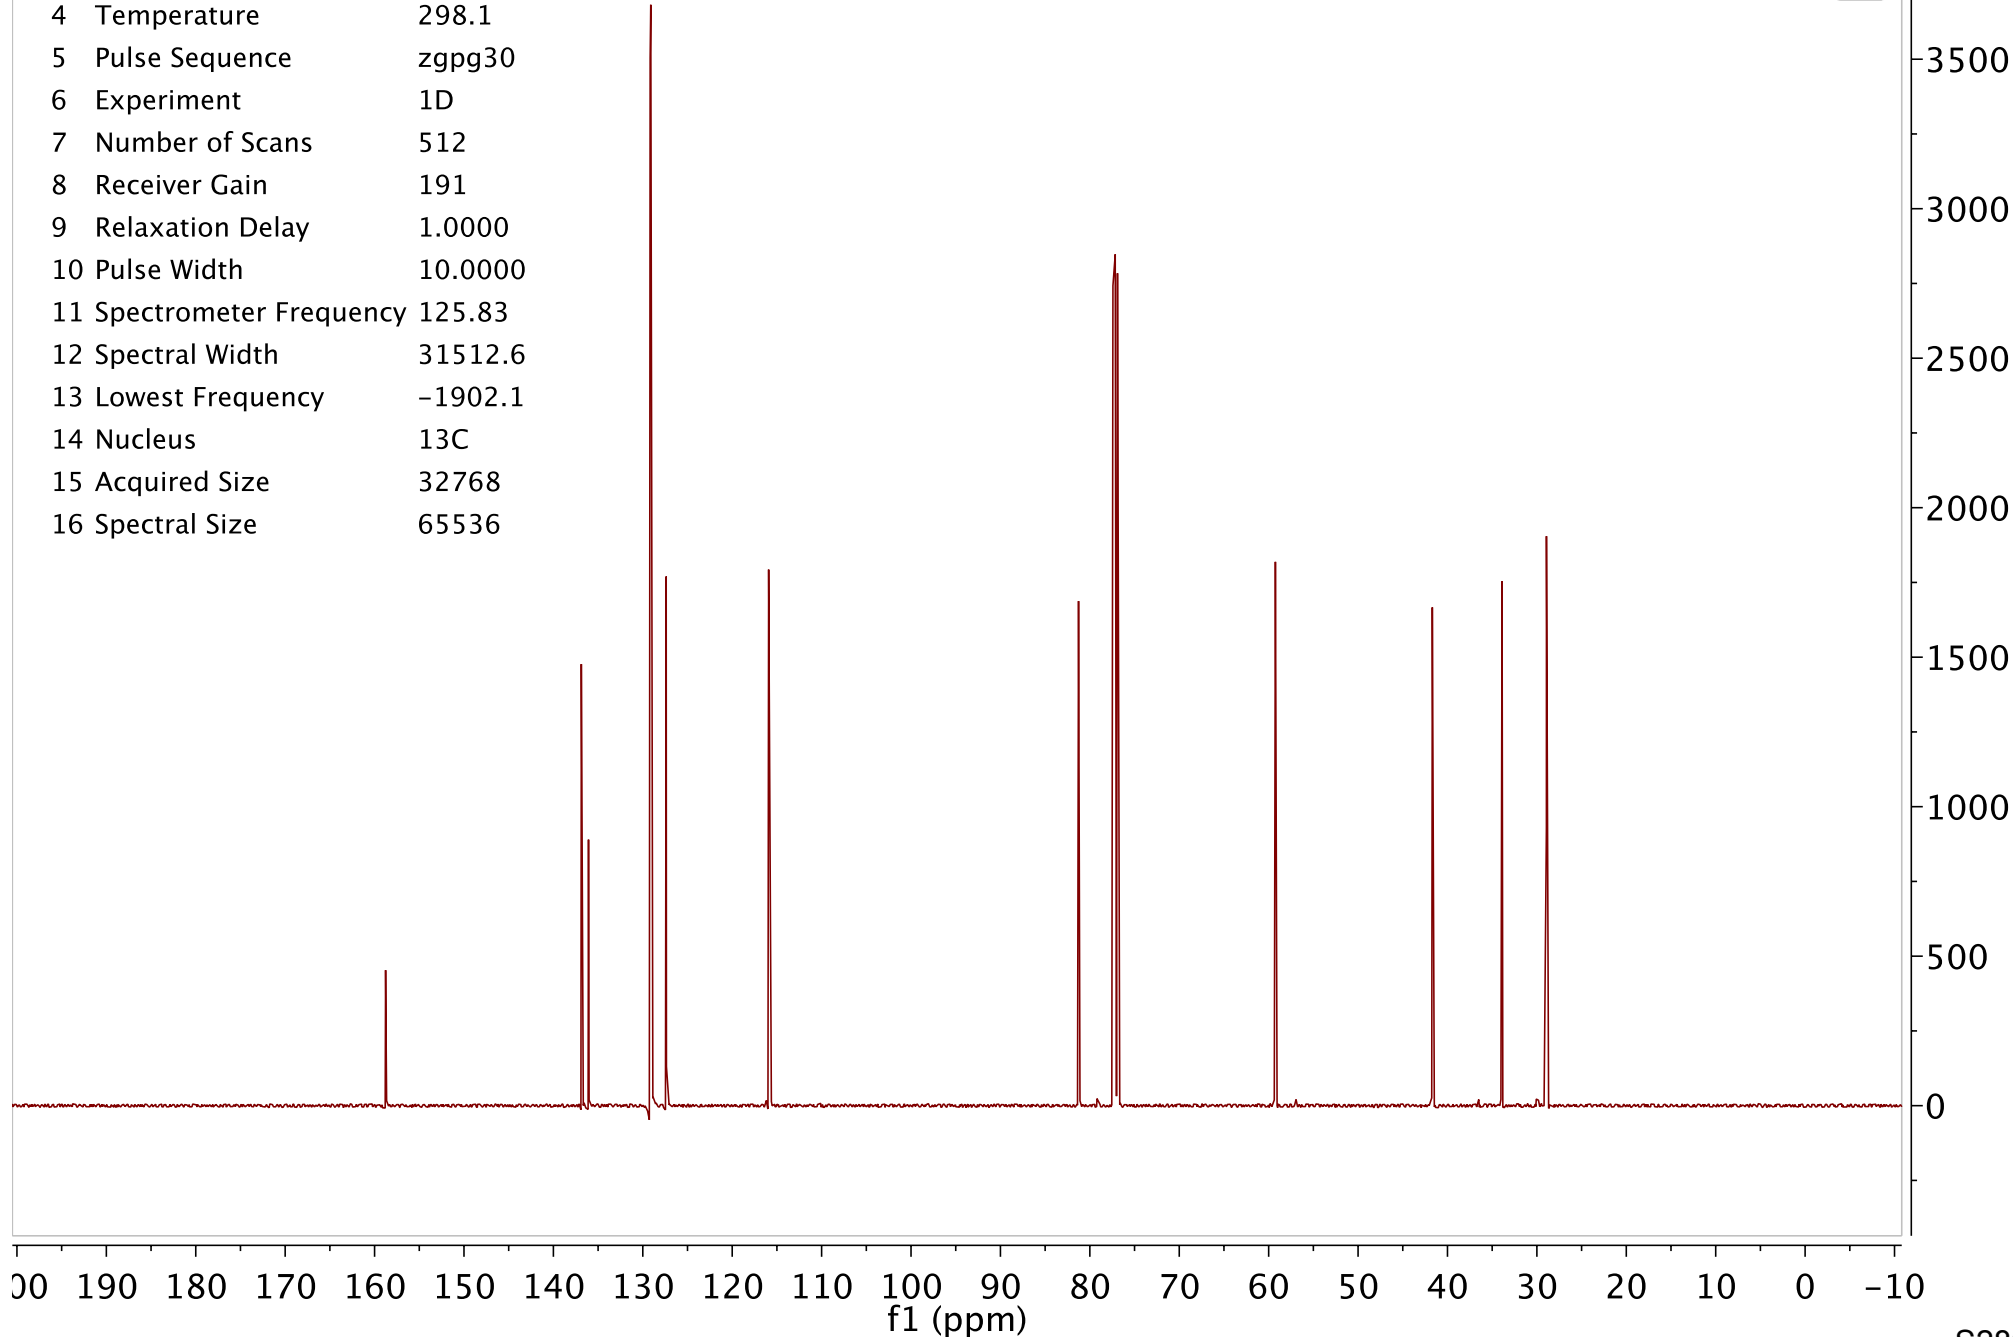

| Parameter                 | Value   |
|---------------------------|---------|
| 1 Origin                  | Varian  |
| 2 Spectrometer            | inova   |
| 3 Solvent                 | CDCl3   |
| 4 Temperature             | 20.0    |
| 5 Pulse Sequence          | s2pul   |
| 6 Experiment              | 1D      |
| 7 Number of Scans         | 6       |
| 8 Receiver Gain           | 58      |
| 9 Relaxation Delay        | 15.0000 |
| 10 Pulse Width            | 6.5000  |
| 11 Spectrometer Frequency | 499.69  |
| 12 Spectral Width         | 7024.9  |
| 13 Lowest Frequency       | -1022.9 |
| 14 Nucleus                | 1H      |
| 15 Acquired Size          | 32768   |
| 16 Spectral Size          | 65536   |

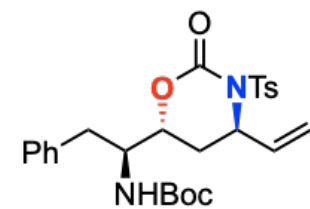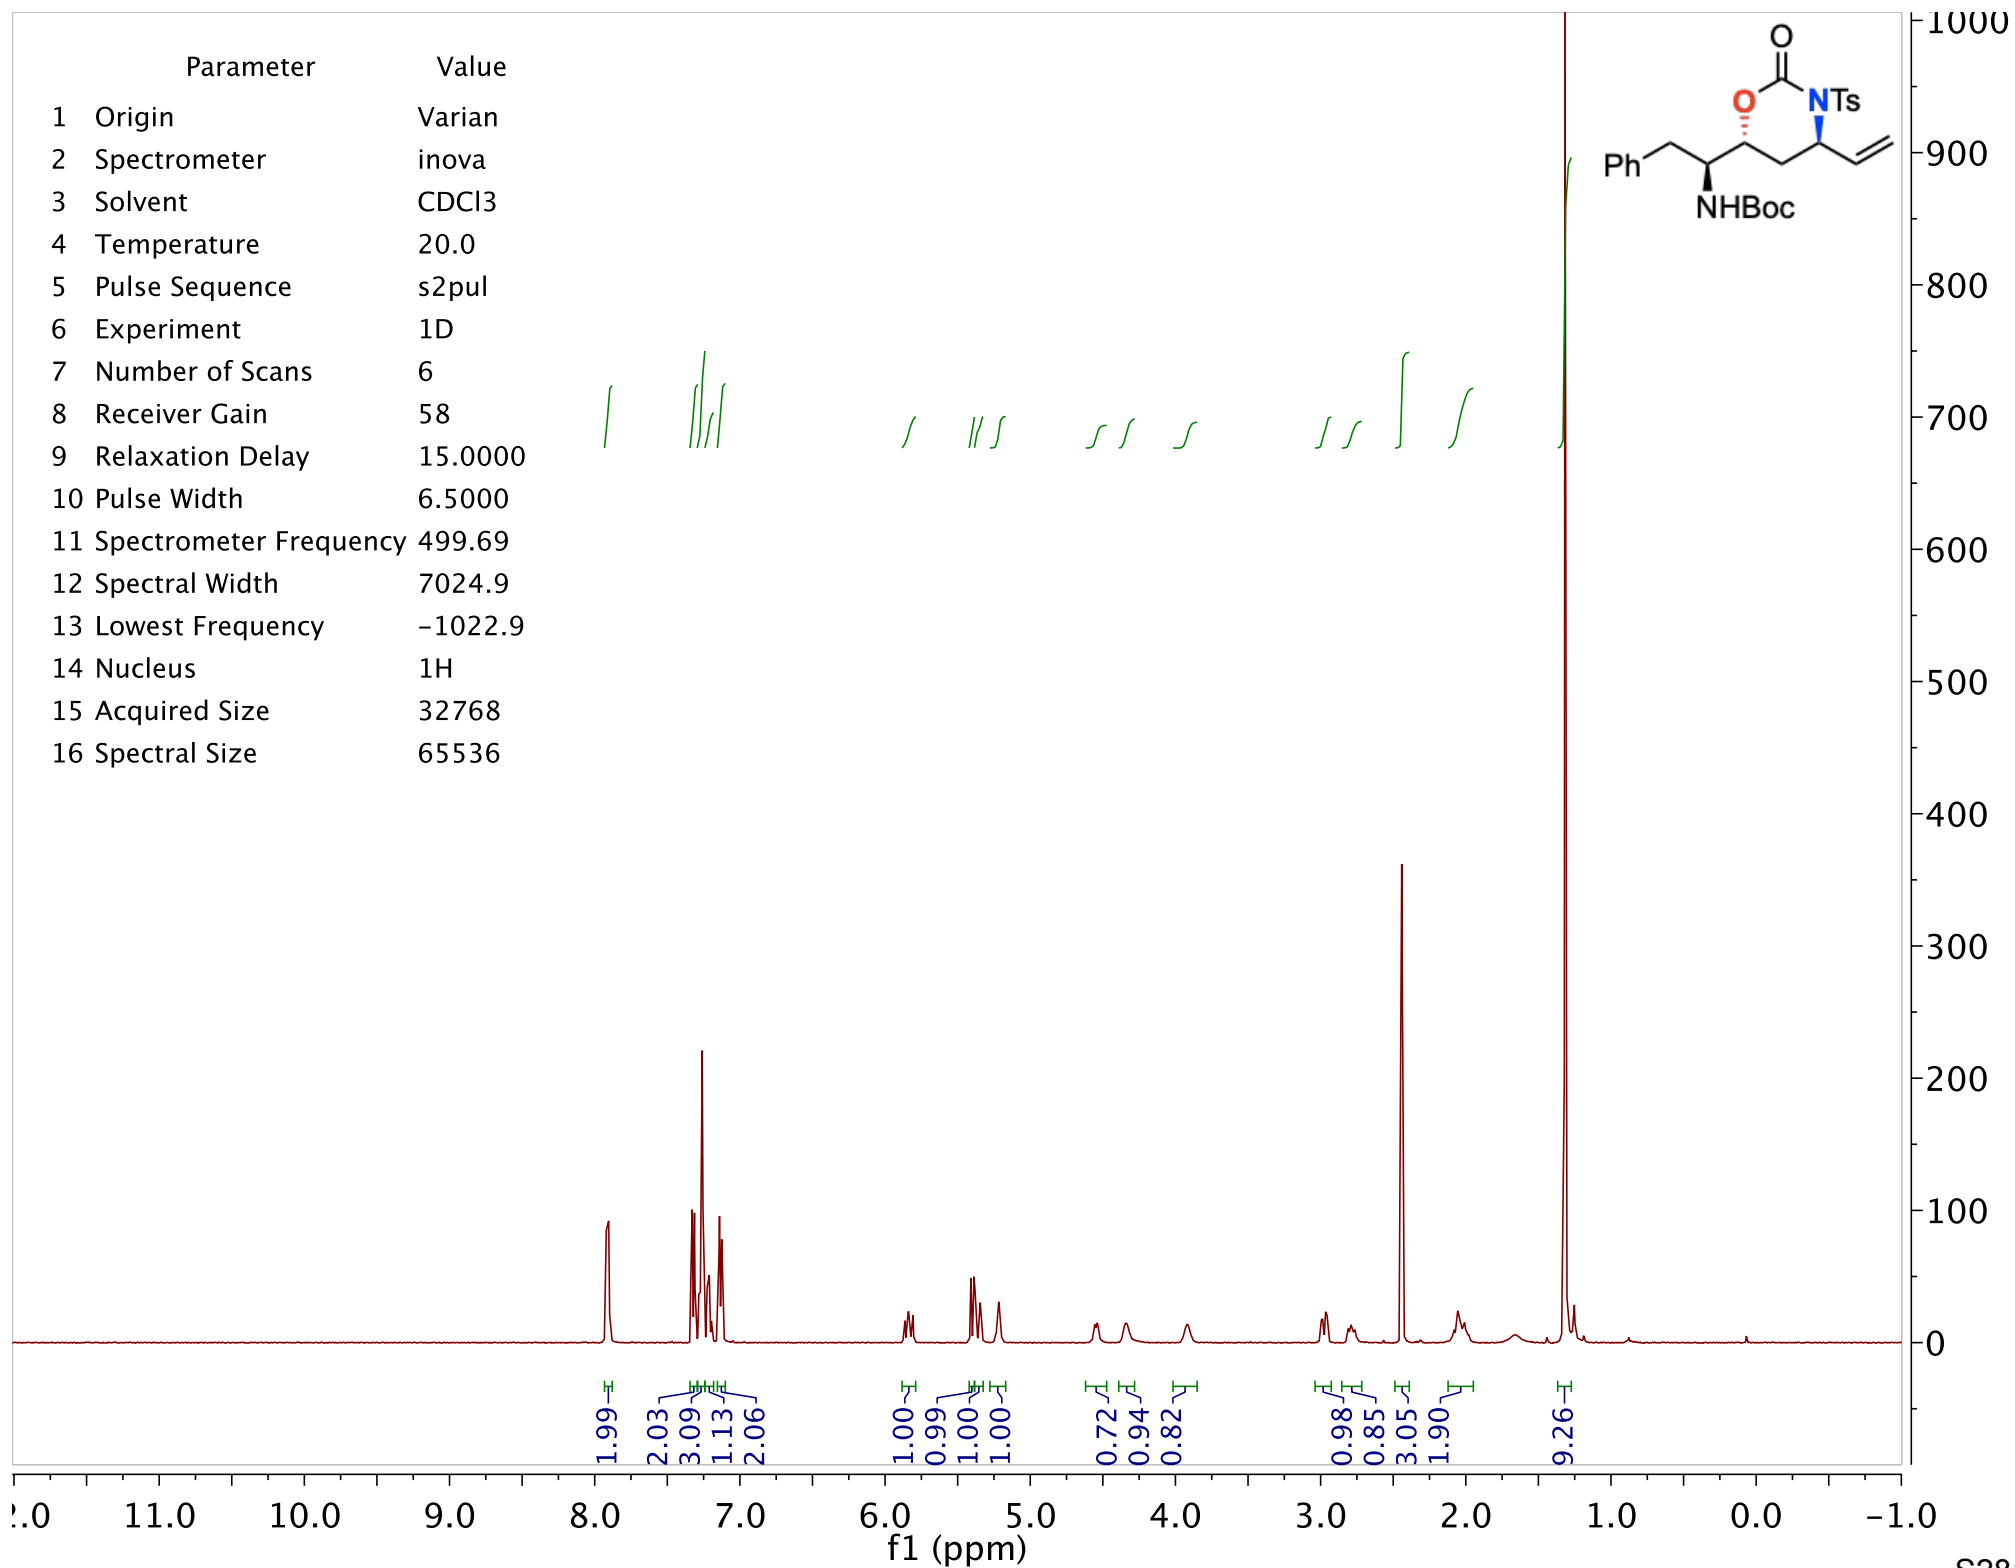

| Parameter                 | Value   |
|---------------------------|---------|
| 1 Origin                  | Varian  |
| 2 Spectrometer            | inova   |
| 3 Solvent                 | CDCl3   |
| 4 Temperature             | 20.0    |
| 5 Pulse Sequence          | s2pul   |
| 6 Experiment              | 1D      |
| 7 Number of Scans         | 3550    |
| 8 Receiver Gain           | 60      |
| 9 Relaxation Delay        | 1.0000  |
| 10 Pulse Width            | 6.0000  |
| 11 Spectrometer Frequency | 125.66  |
| 12 Spectral Width         | 30165.9 |
| 13 Lowest Frequency       | -1273.6 |
| 14 Nucleus                | 13C     |
| 15 Acquired Size          | 32768   |
| 16 Spectral Size          | 65536   |

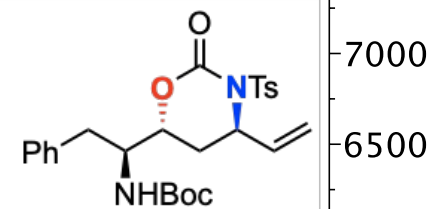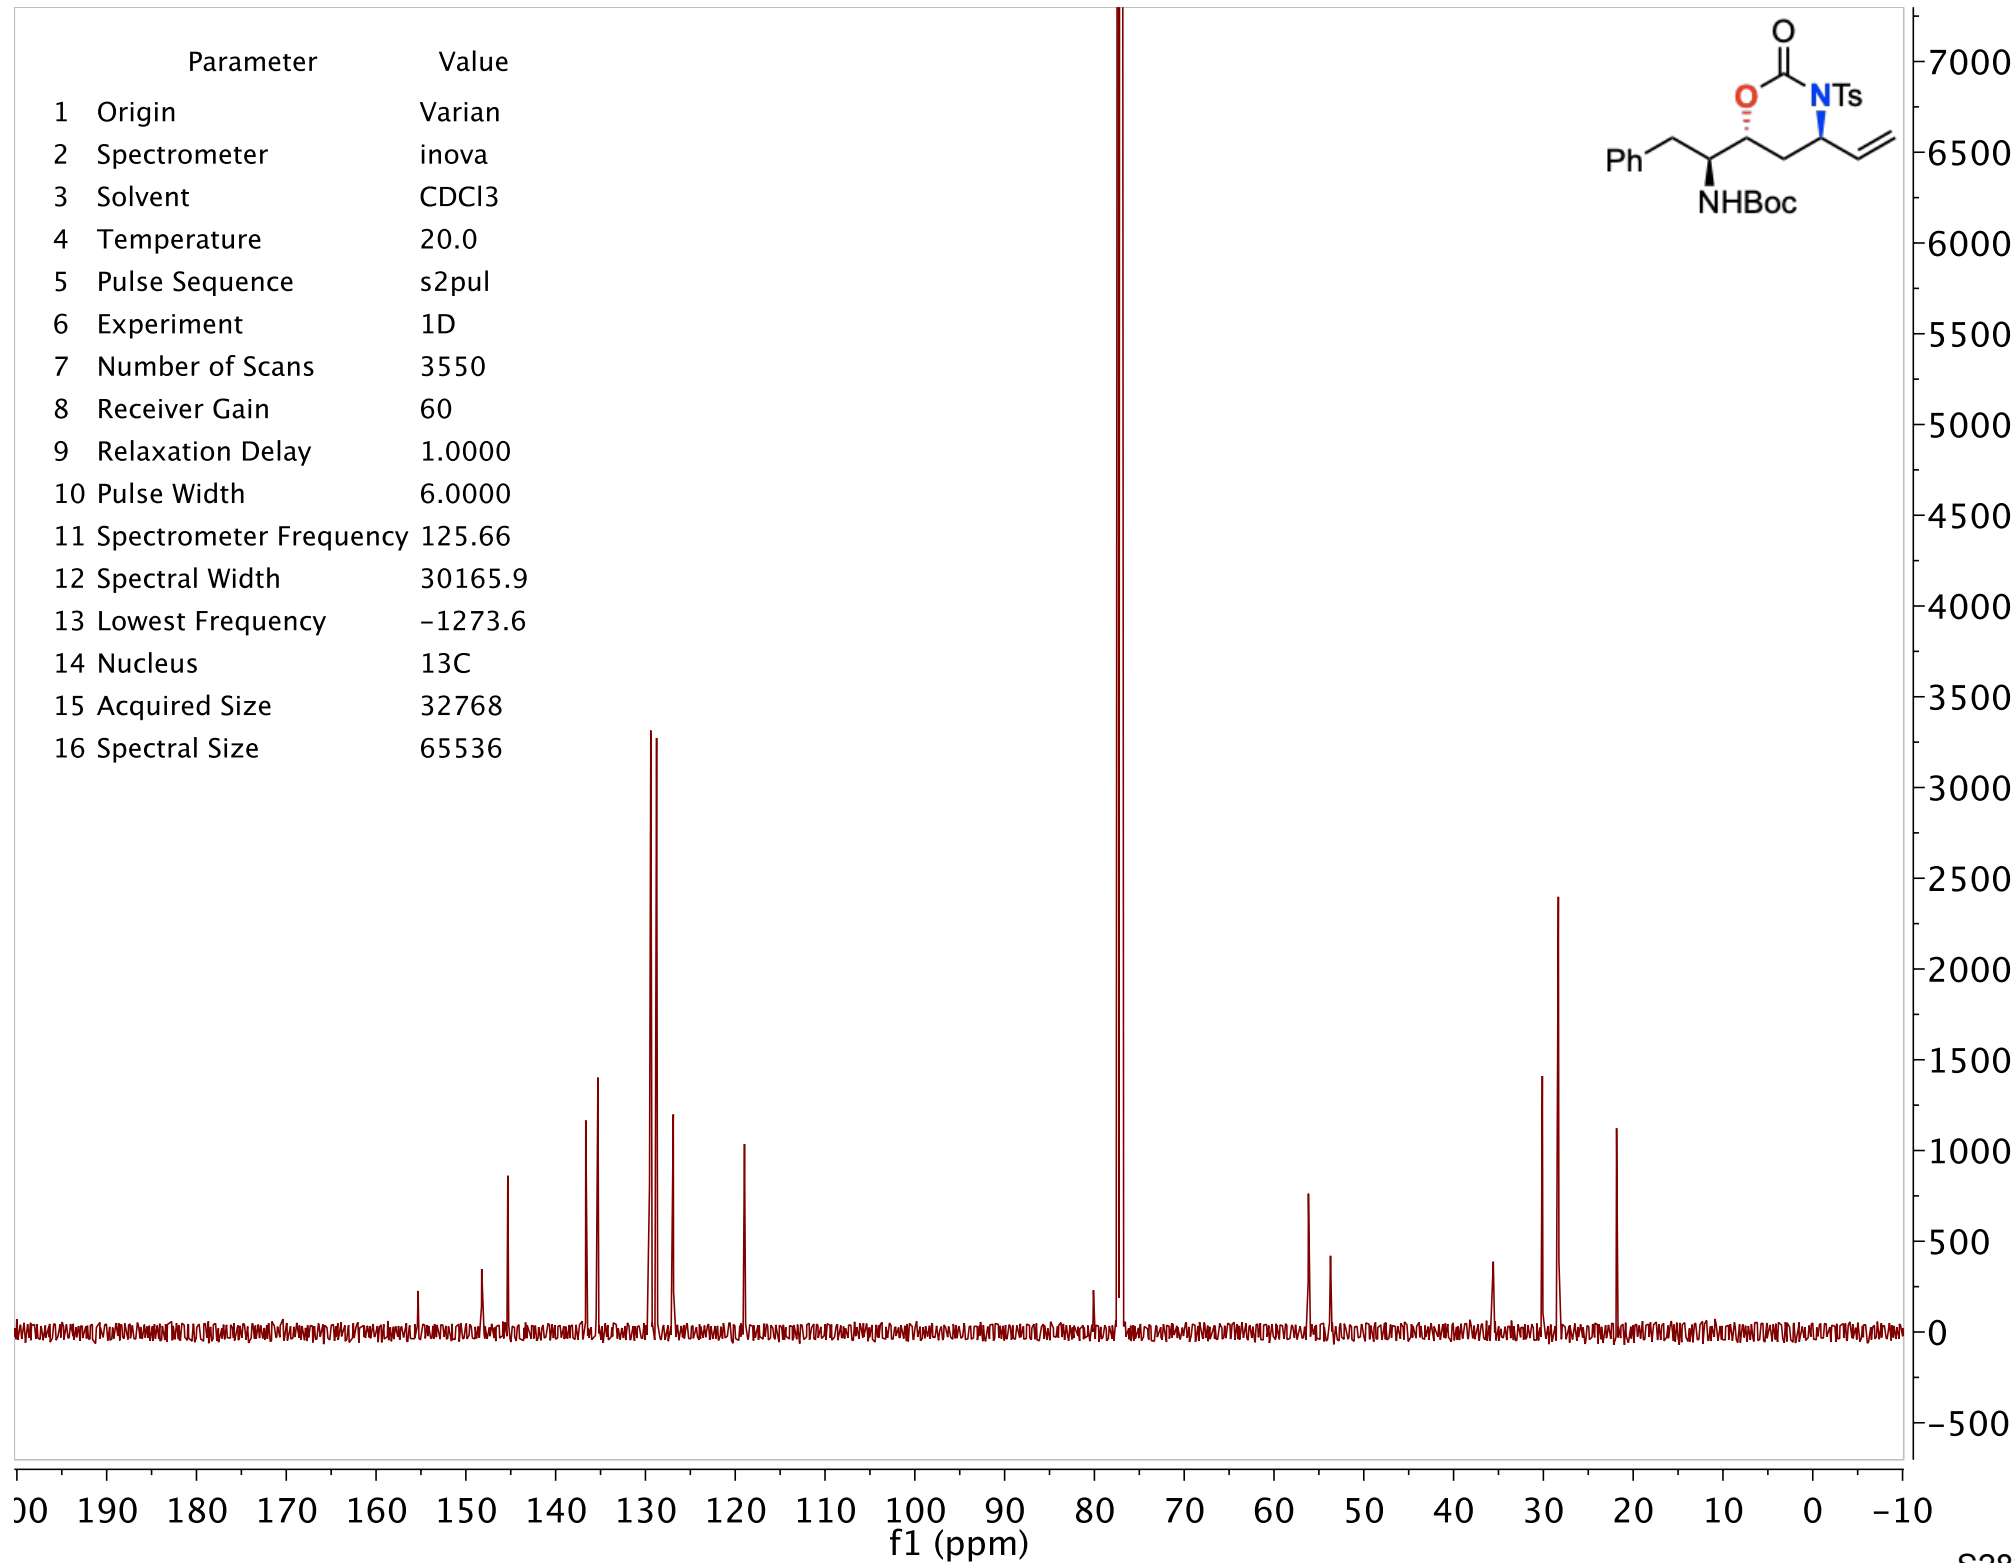

| Parameter                 | Value   |
|---------------------------|---------|
| 1 Origin                  | Varian  |
| 2 Spectrometer            | inova   |
| 3 Solvent                 | CDCl3   |
| 4 Temperature             | 20.0    |
| 5 Pulse Sequence          | s2pul   |
| 6 Experiment              | 1D      |
| 7 Number of Scans         | 4       |
| 8 Receiver Gain           | 56      |
| 9 Relaxation Delay        | 15.0000 |
| 10 Pulse Width            | 6.5000  |
| 11 Spectrometer Frequency | 499.69  |
| 12 Spectral Width         | 7024.9  |
| 13 Lowest Frequency       | -1011.9 |
| 14 Nucleus                | 1H      |
| 15 Acquired Size          | 32768   |
| 16 Spectral Size          | 65536   |

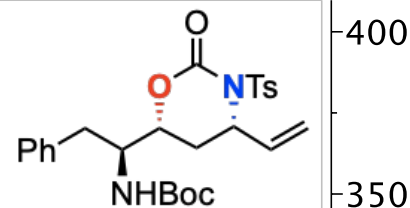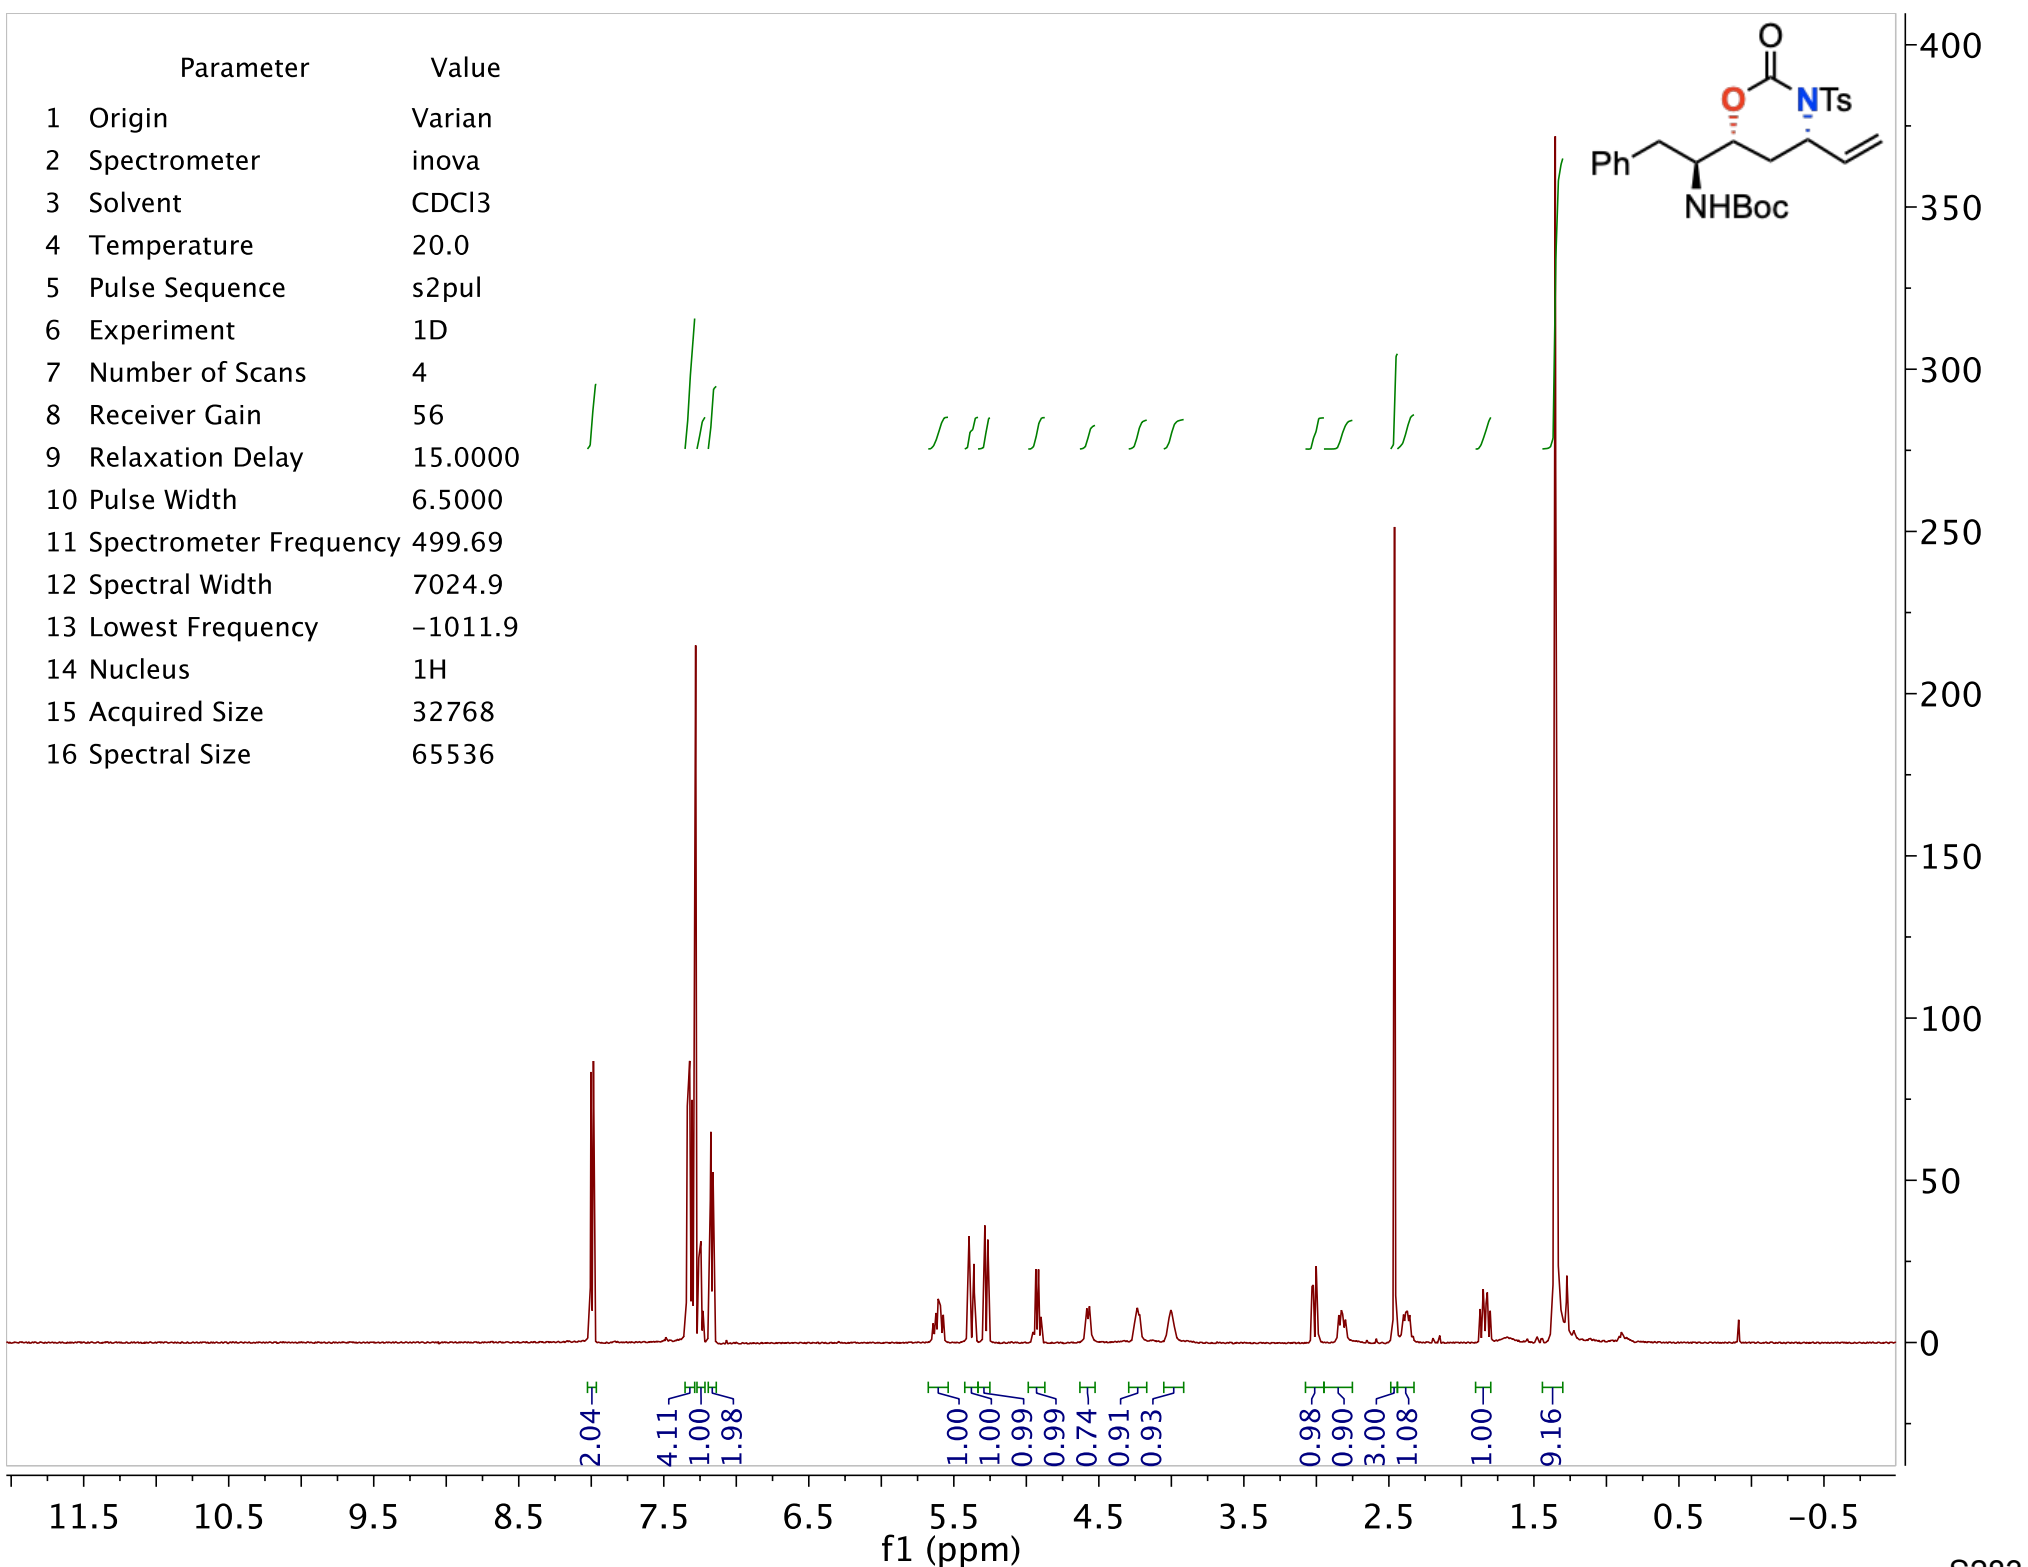

| Parameter                 | Value           |
|---------------------------|-----------------|
| 1 Origin                  | Varian          |
| 2 Spectrometer            | inova           |
| 3 Solvent                 | CDCl3           |
| 4 Temperature             | 20.0            |
| 5 Pulse Sequence          | s2pul           |
| 6 Experiment              | 1D              |
| 7 Number of Scans         | 3209            |
| 8 Receiver Gain           | 60              |
| 9 Relaxation Delay        | 1.0000          |
| 10 Pulse Width            | 6.0000          |
| 11 Spectrometer Frequency | 125.66          |
| 12 Spectral Width         | 30165.9         |
| 13 Lowest Frequency       | -1260.2         |
| 14 Nucleus                | <sup>13</sup> C |
| 15 Acquired Size          | 32768           |
| 16 Spectral Size          | 65536           |

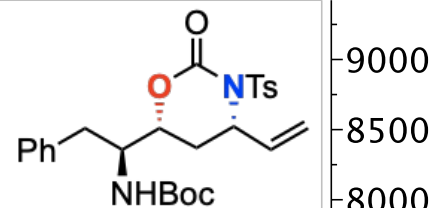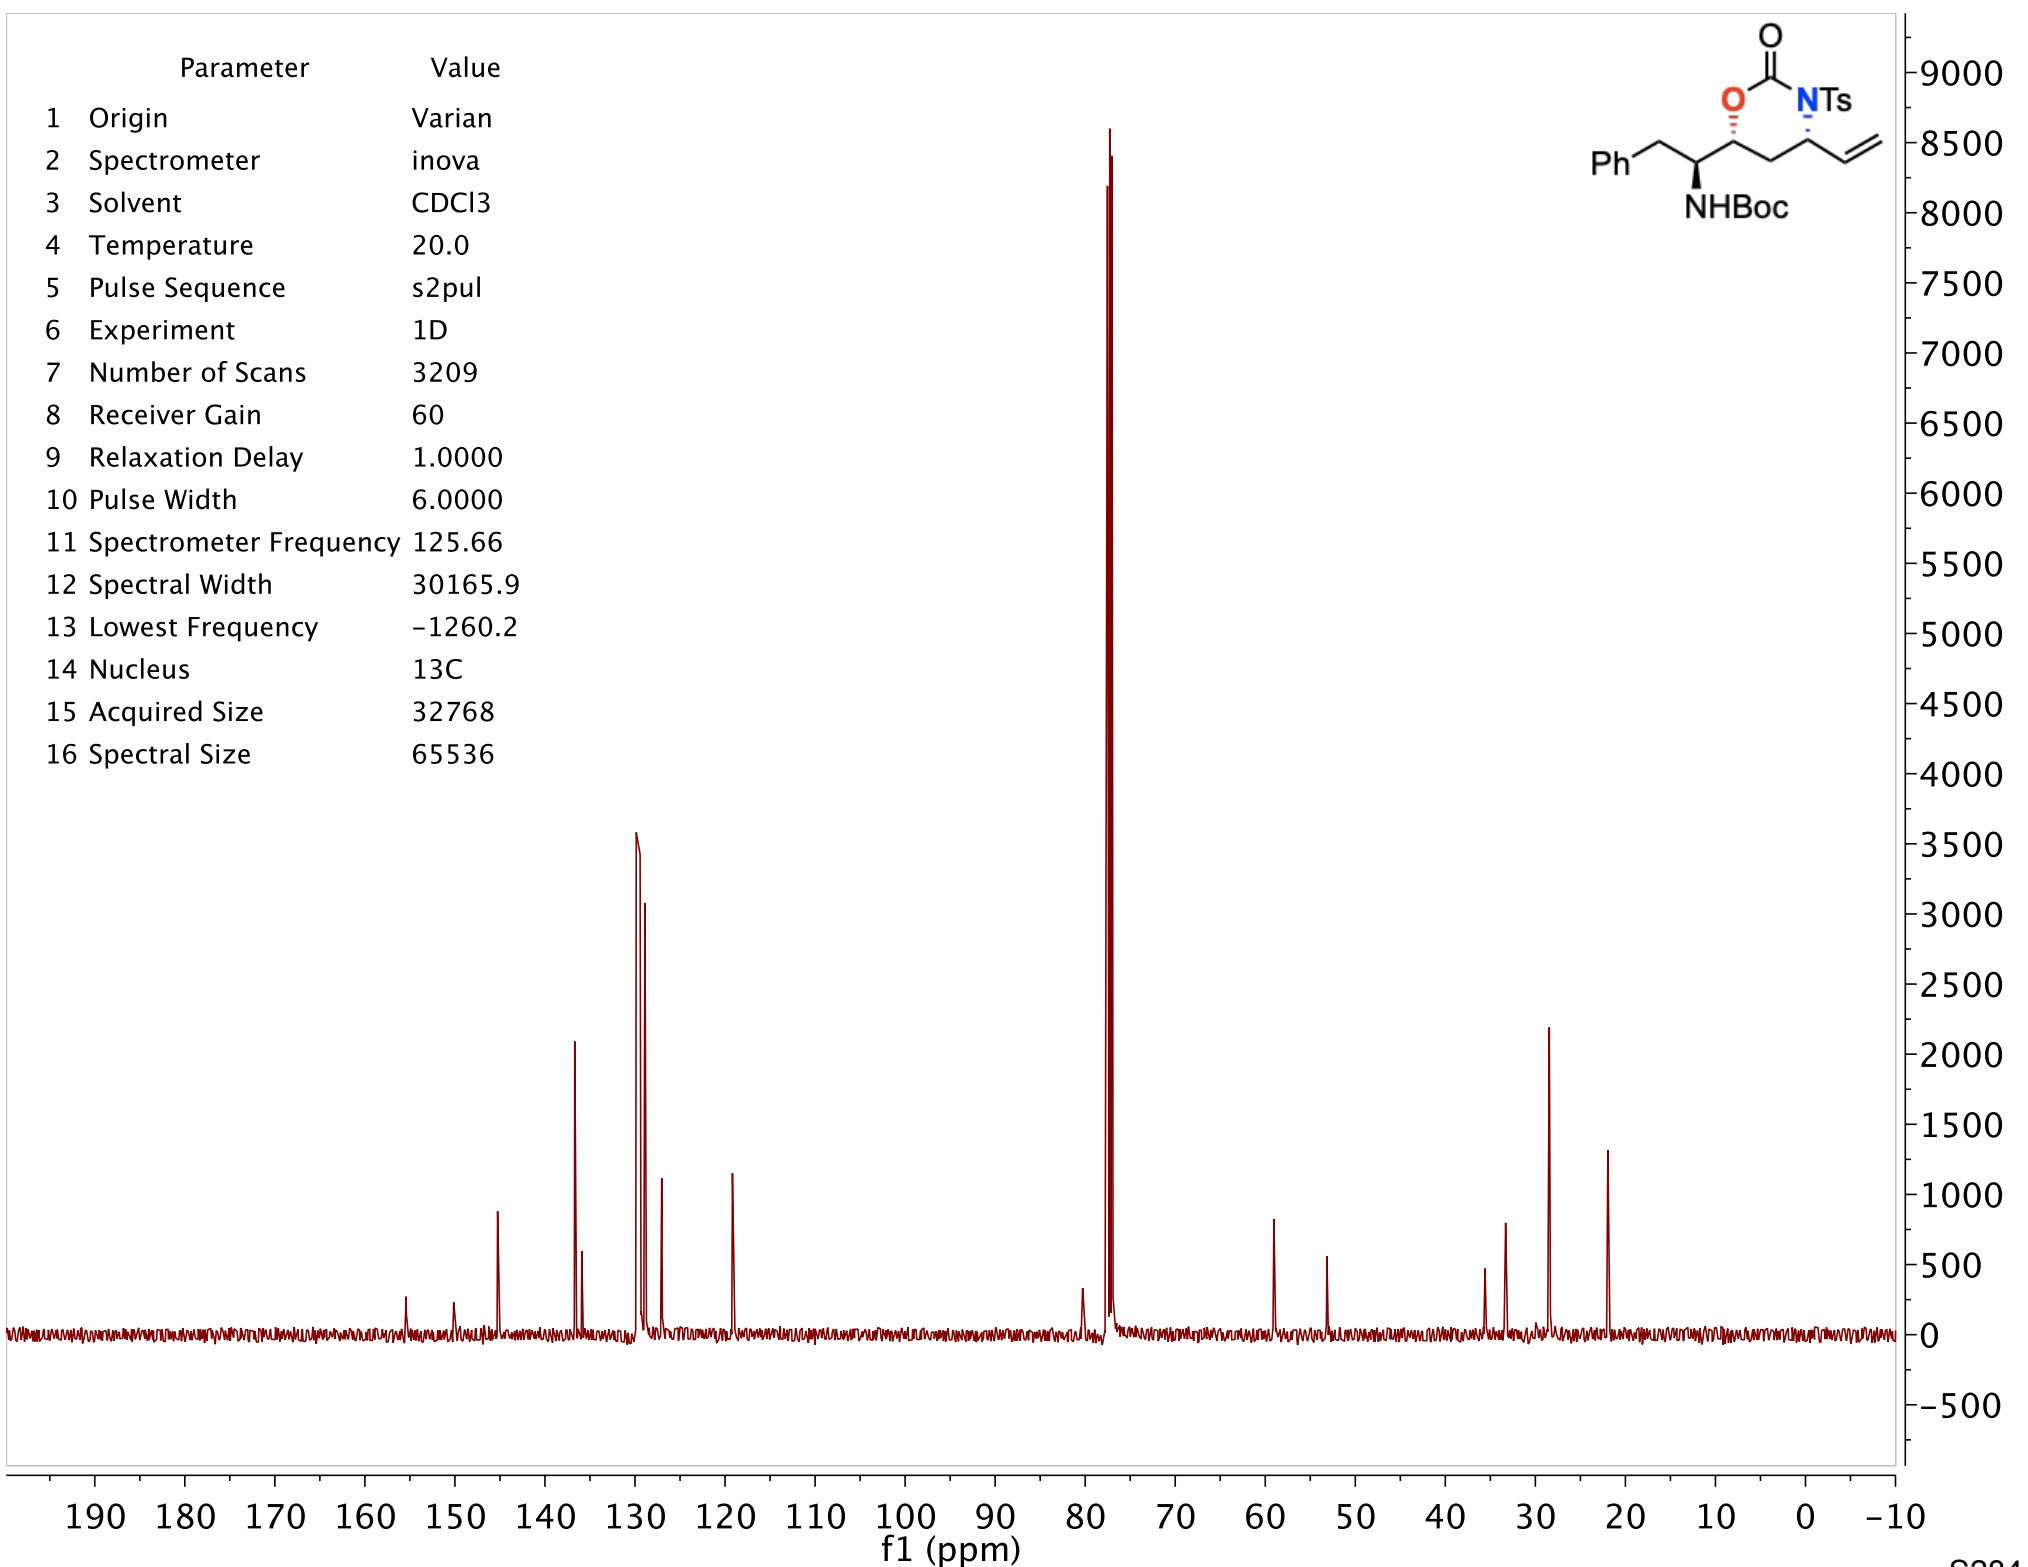

| Parameter                 | Value               |
|---------------------------|---------------------|
| 1 Origin                  | Bruker BioSpin GmbH |
| 2 Spectrometer            | spect               |
| 3 Solvent                 | CDCl3               |
| 4 Temperature             | 296.1               |
| 5 Pulse Sequence          | zg30                |
| 6 Experiment              | 1D                  |
| 7 Number of Scans         | 6                   |
| 8 Receiver Gain           | 69                  |
| 9 Relaxation Delay        | 15.0000             |
| 10 Pulse Width            | 12.0000             |
| 11 Spectrometer Frequency | 500.35              |
| 12 Spectral Width         | 10000.0             |
| 13 Lowest Frequency       | -1957.6             |
| 14 Nucleus                | 1H                  |
| 15 Acquired Size          | 32768               |
| 16 Spectral Size          | 65536               |

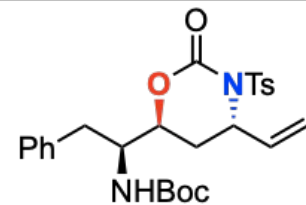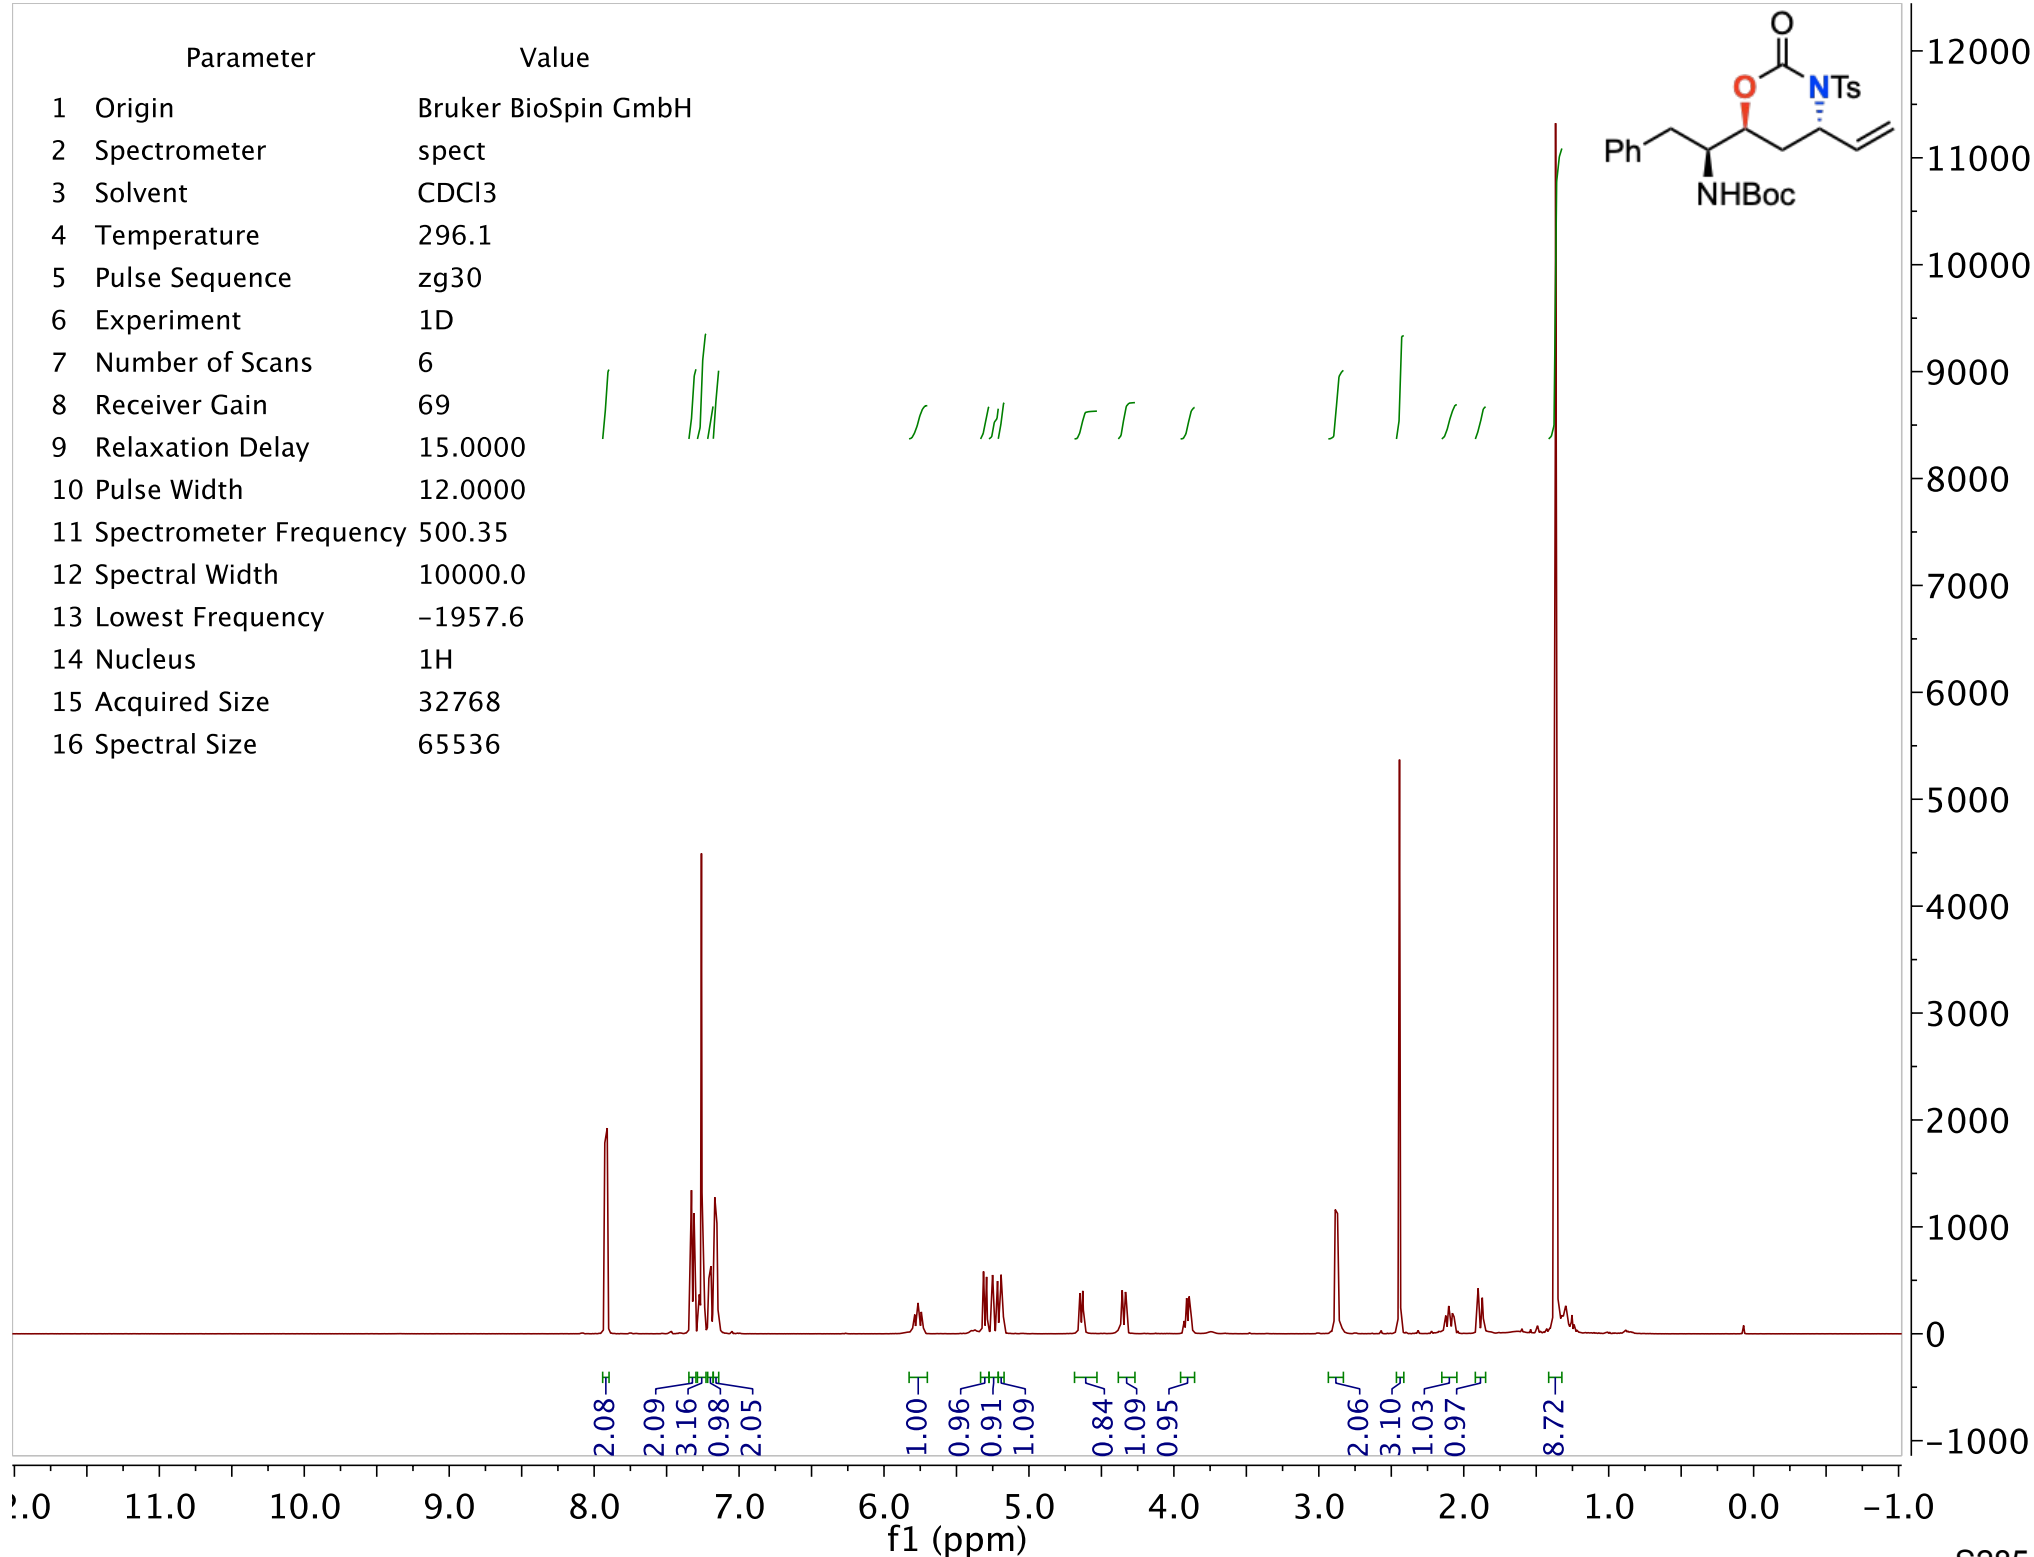

| Parameter                 | Value               |
|---------------------------|---------------------|
| 1 Origin                  | Bruker BioSpin GmbH |
| 2 Spectrometer            | spect               |
| 3 Solvent                 | CDCl3               |
| 4 Temperature             | 296.2               |
| 5 Pulse Sequence          | zgpg30              |
| 6 Experiment              | 1D                  |
| 7 Number of Scans         | 2000                |
| 8 Receiver Gain           | 191                 |
| 9 Relaxation Delay        | 1.0000              |
| 10 Pulse Width            | 10.0000             |
| 11 Spectrometer Frequency | 125.83              |
| 12 Spectral Width         | 31512.6             |
| 13 Lowest Frequency       | -1916.9             |
| 14 Nucleus                | 13C                 |
| 15 Acquired Size          | 32768               |
| 16 Spectral Size          | 65536               |

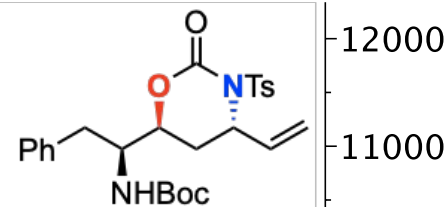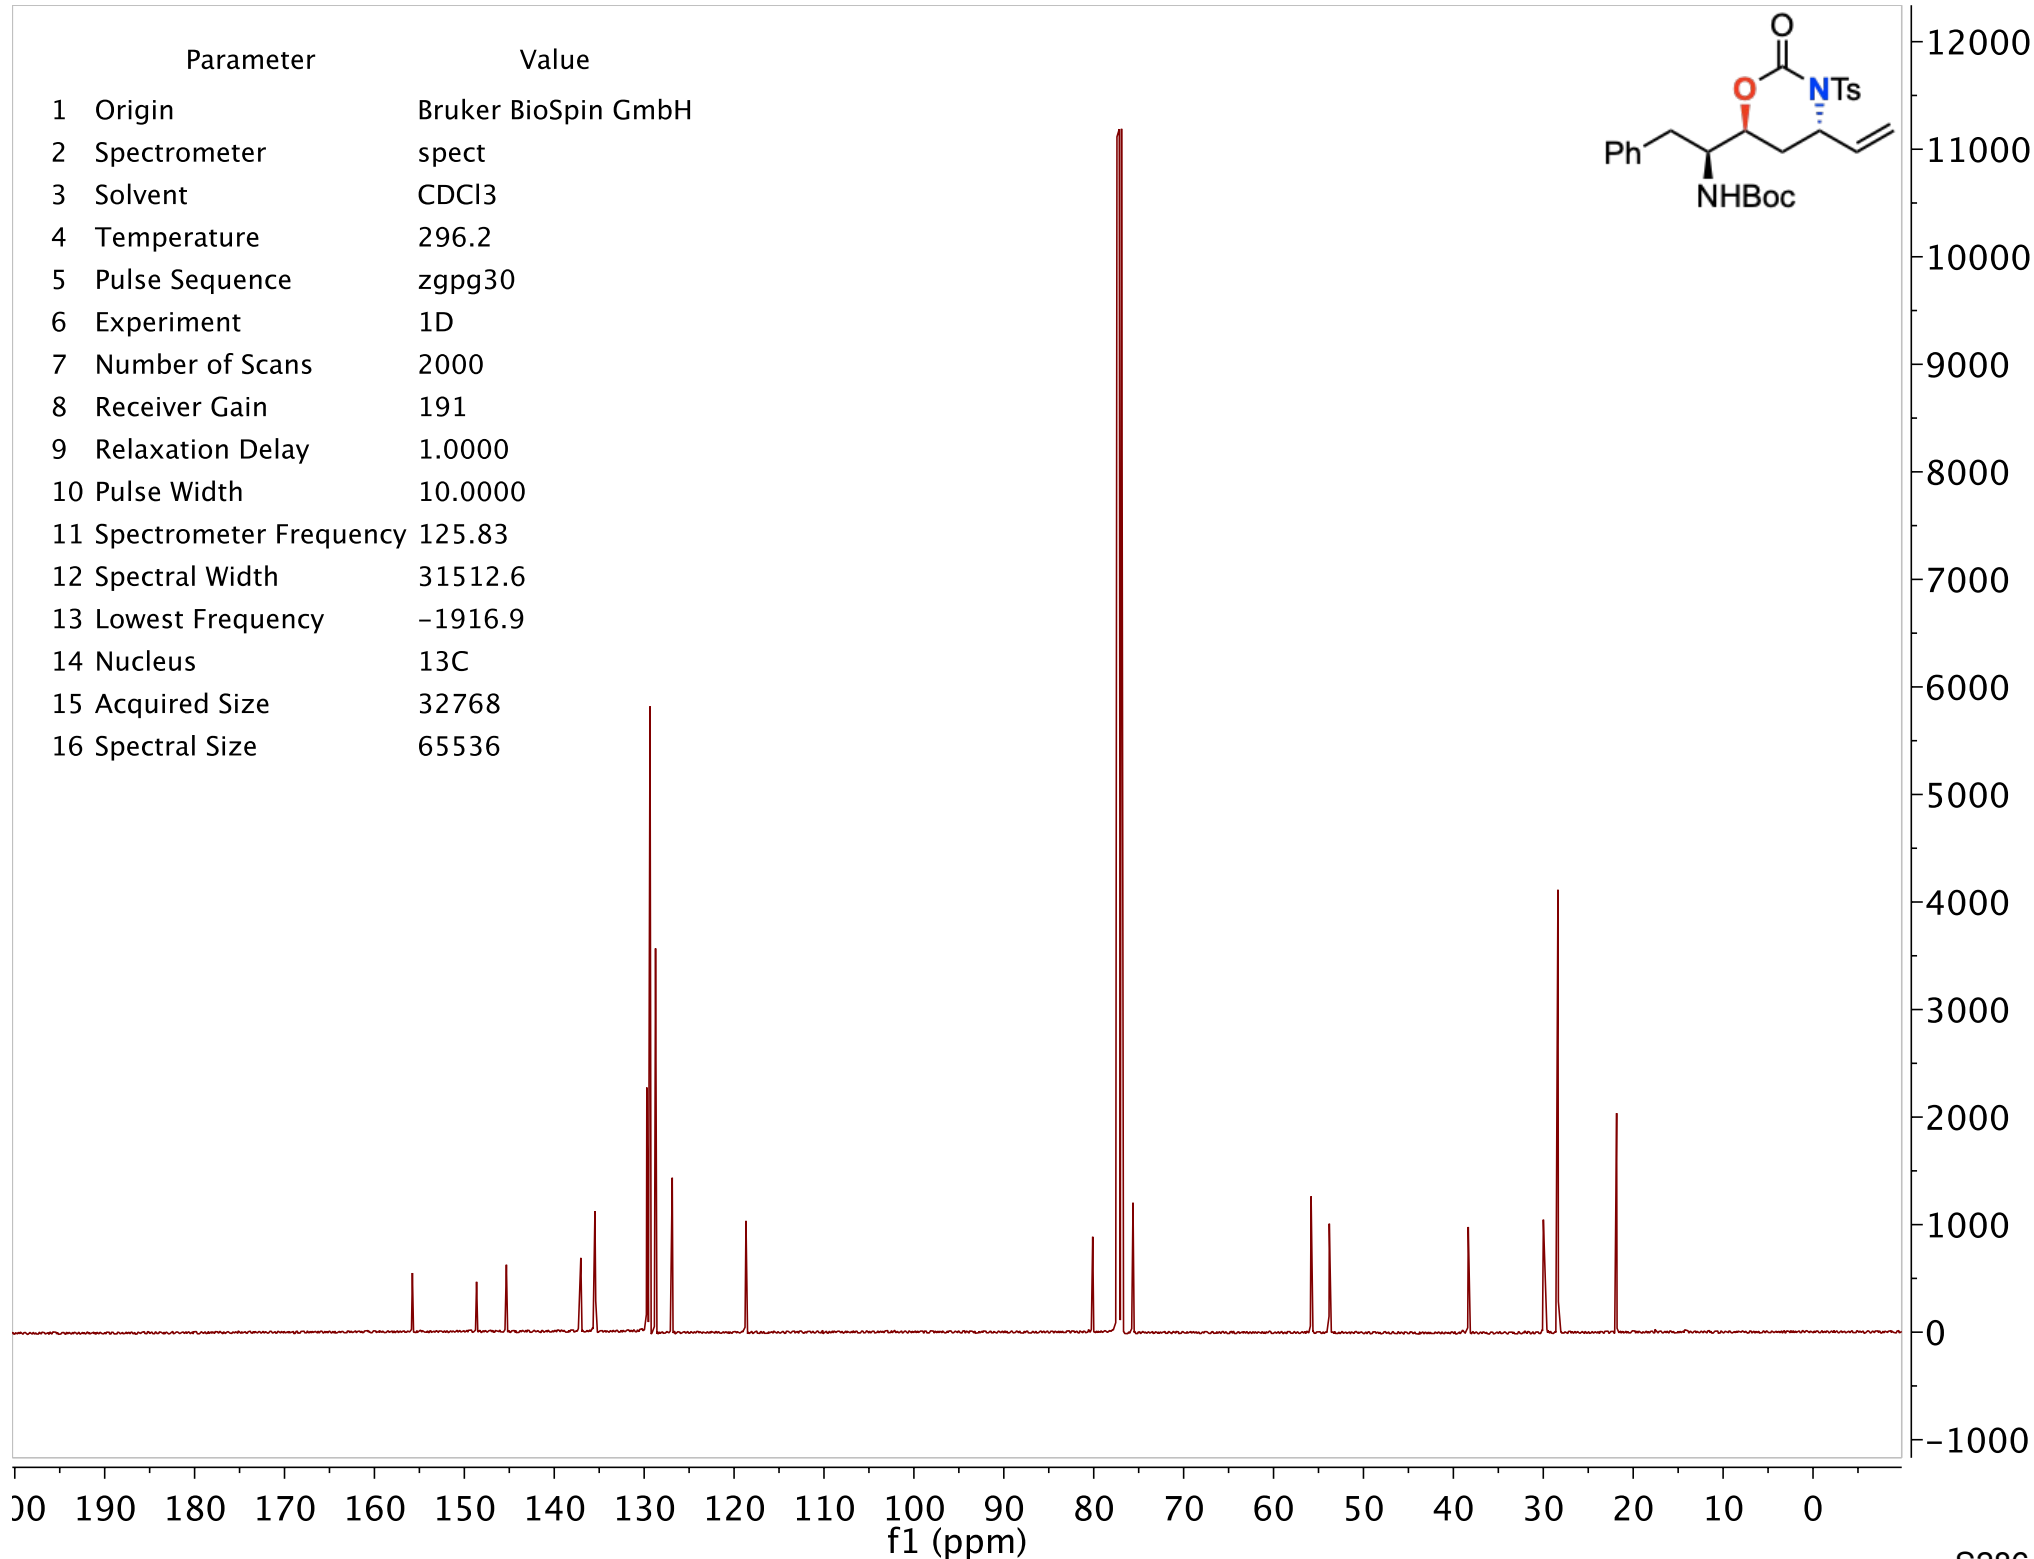



| Parameter                 | Value   |
|---------------------------|---------|
| 1 Origin                  | Varian  |
| 2 Spectrometer            | inova   |
| 3 Solvent                 | CDCl3   |
| 4 Temperature             | 20.0    |
| 5 Pulse Sequence          | s2pul   |
| 6 Experiment              | 1D      |
| 7 Number of Scans         | 6       |
| 8 Receiver Gain           | 54      |
| 9 Relaxation Delay        | 15.0000 |
| 10 Pulse Width            | 6.5000  |
| 11 Spectrometer Frequency | 499.69  |
| 12 Spectral Width         | 7024.9  |
| 13 Lowest Frequency       | -1011.9 |
| 14 Nucleus                | 1H      |
| 15 Acquired Size          | 32768   |
| 16 Spectral Size          | 65536   |

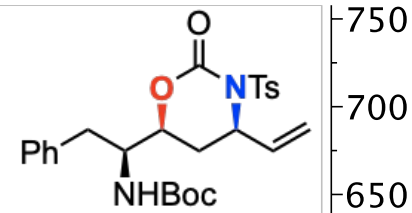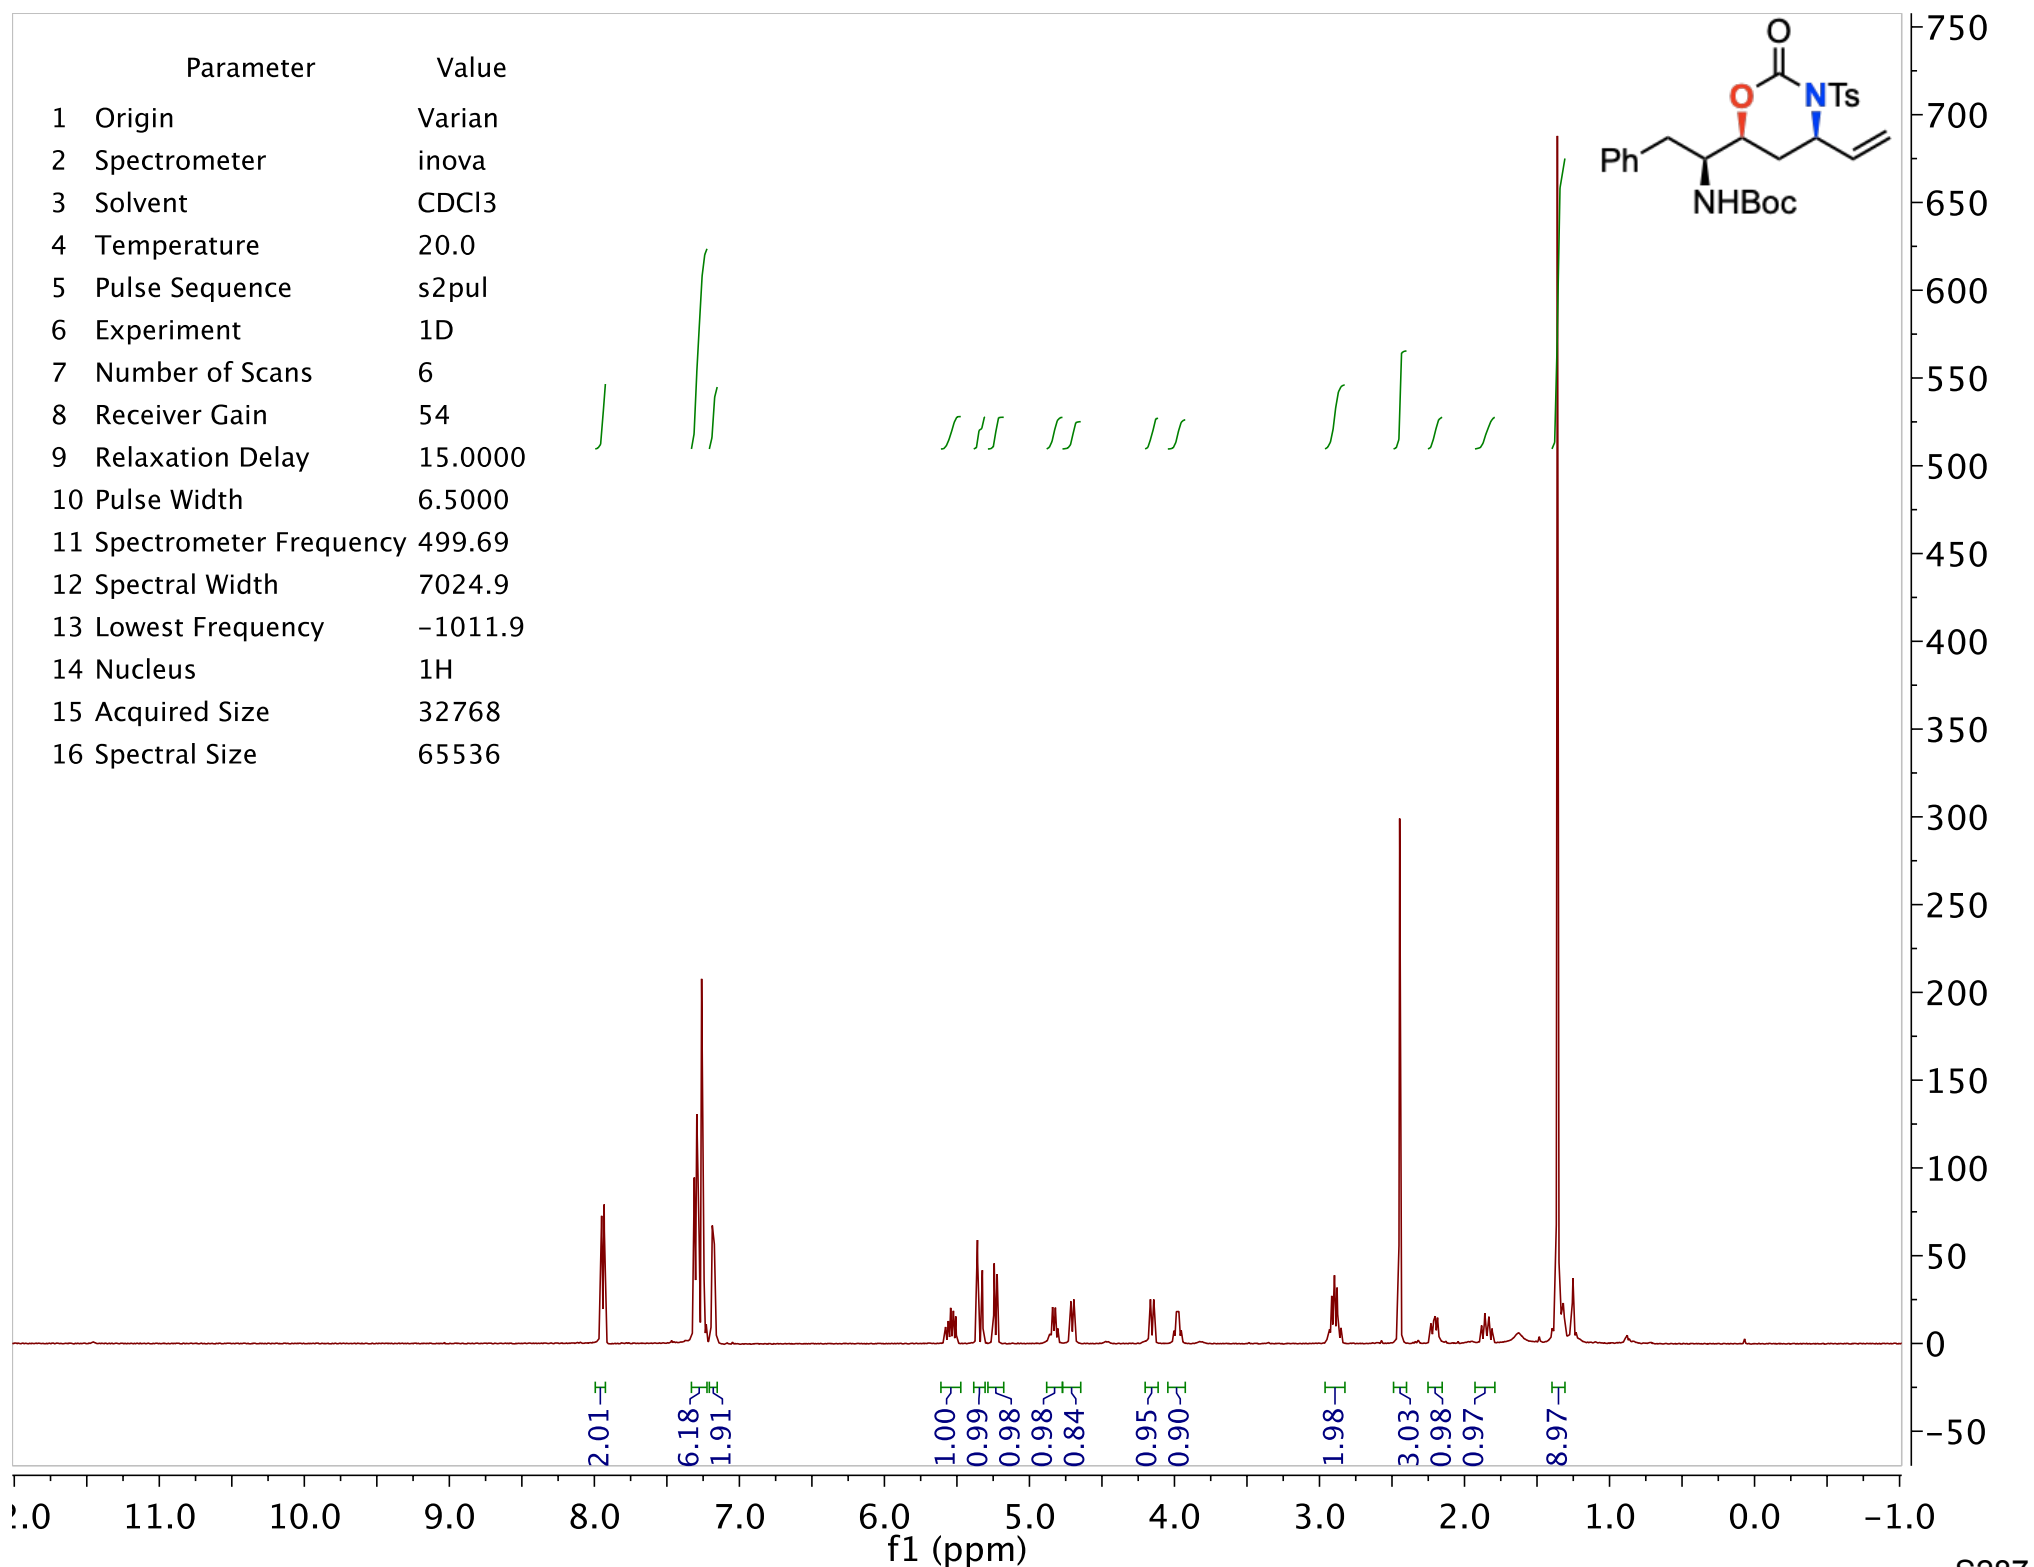

| Parameter                 | Value   |
|---------------------------|---------|
| 1 Origin                  | Varian  |
| 2 Spectrometer            | inova   |
| 3 Solvent                 | CDCl3   |
| 4 Temperature             | 20.0    |
| 5 Pulse Sequence          | s2pul   |
| 6 Experiment              | 1D      |
| 7 Number of Scans         | 2081    |
| 8 Receiver Gain           | 60      |
| 9 Relaxation Delay        | 1.0000  |
| 10 Pulse Width            | 6.0000  |
| 11 Spectrometer Frequency | 125.66  |
| 12 Spectral Width         | 30165.9 |
| 13 Lowest Frequency       | -1273.8 |
| 14 Nucleus                | 13C     |
| 15 Acquired Size          | 32768   |
| 16 Spectral Size          | 65536   |

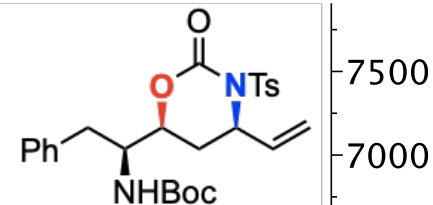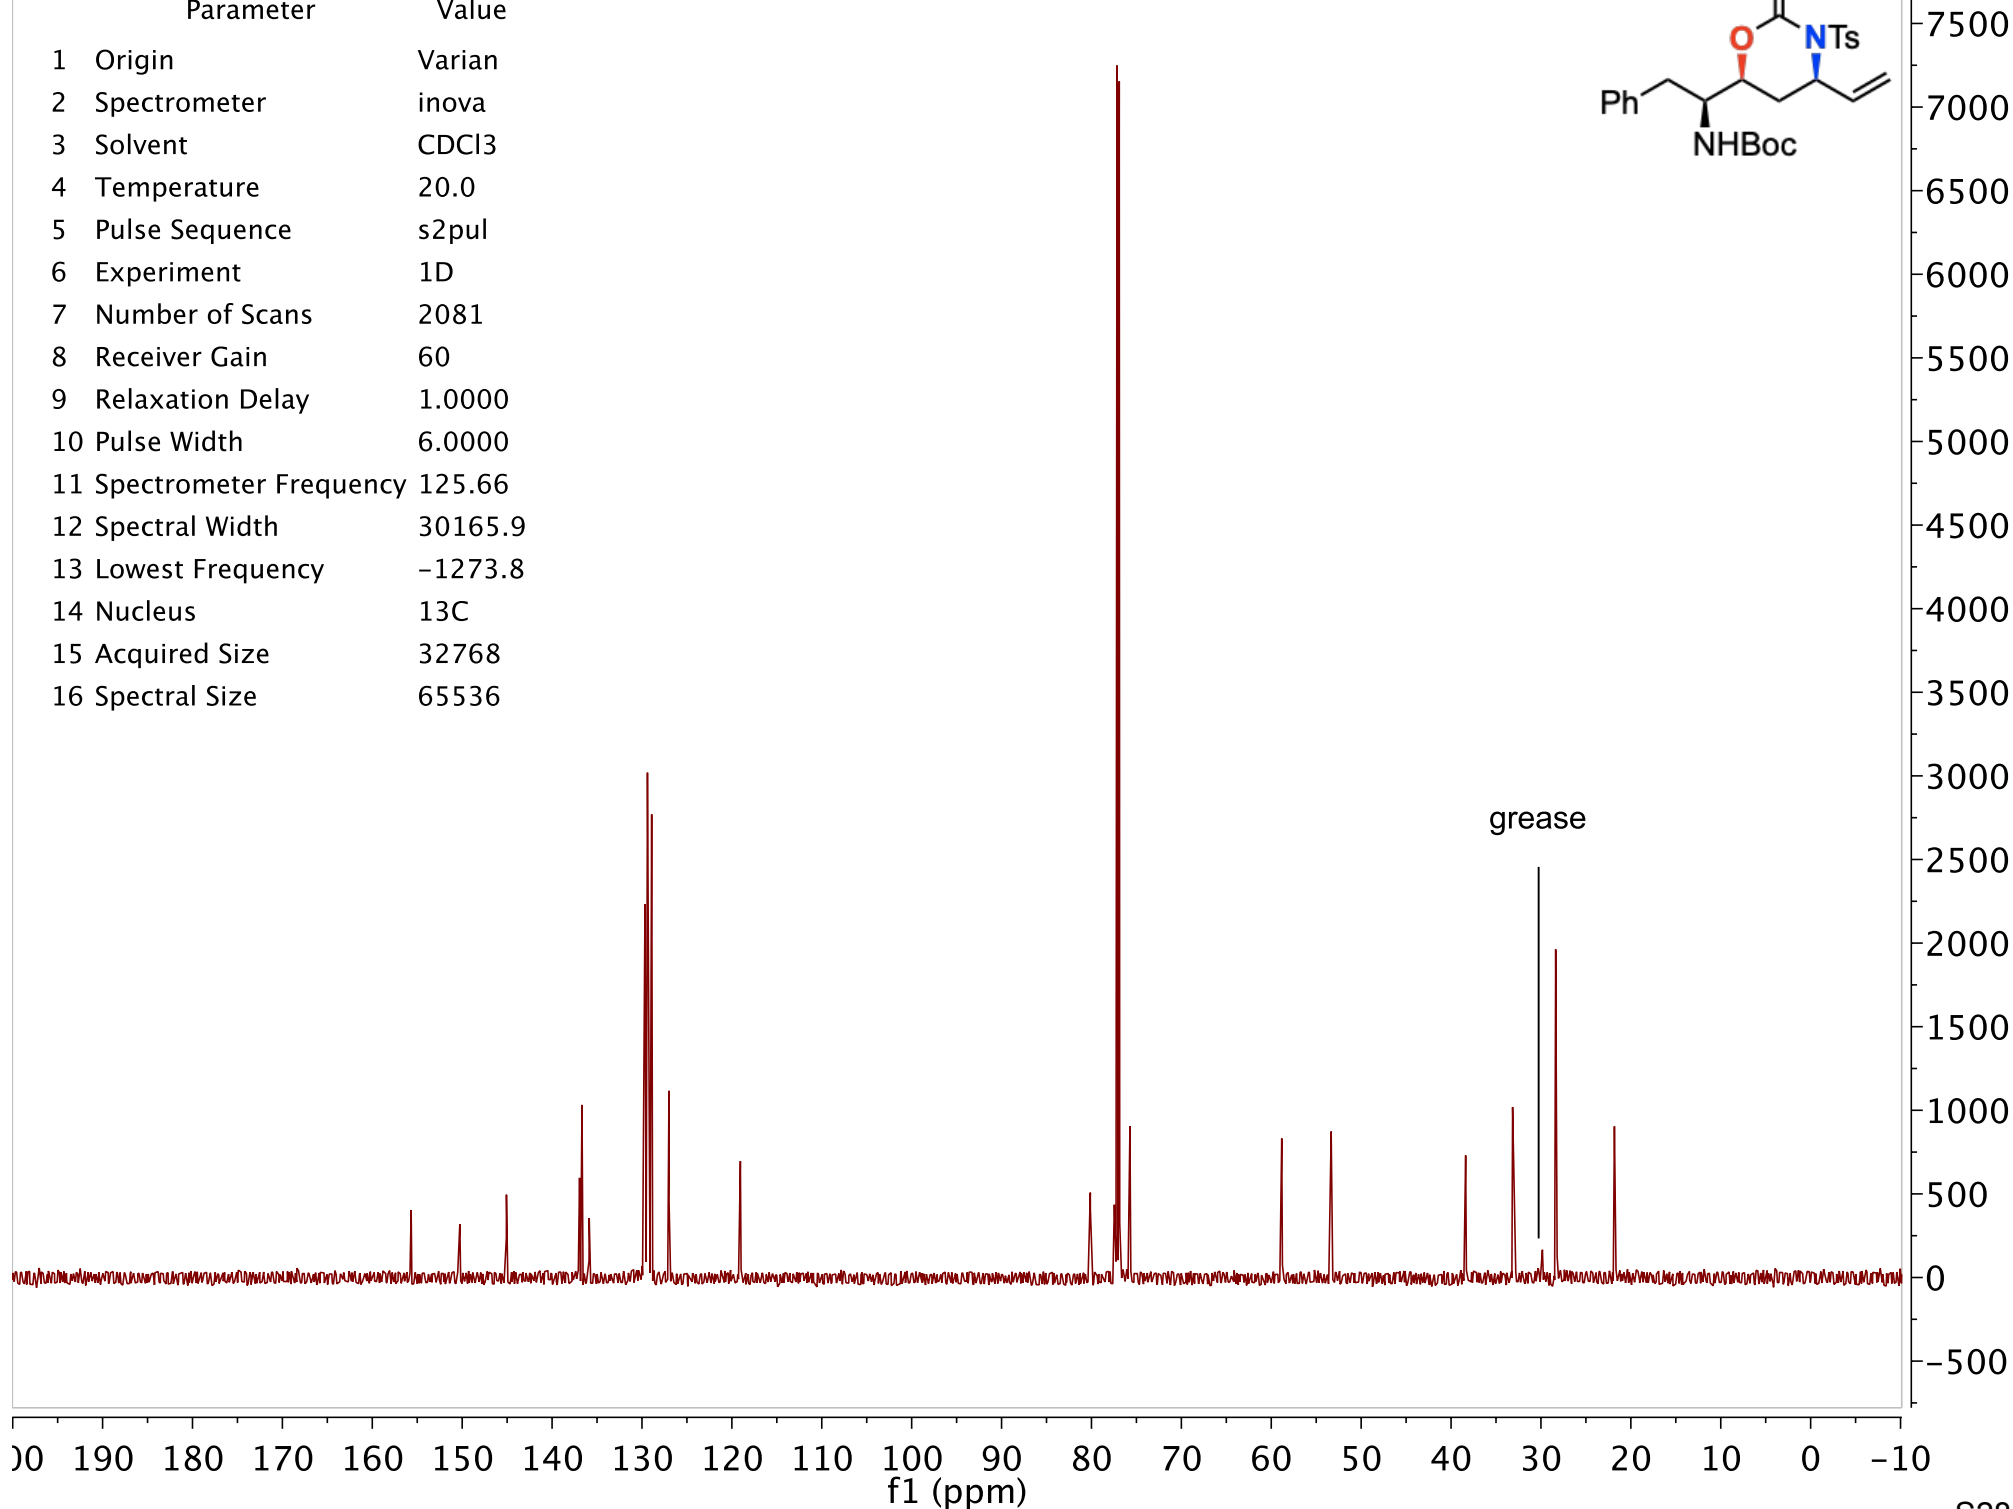

| Parameter                 | Value               |
|---------------------------|---------------------|
| 1 Origin                  | Bruker BioSpin GmbH |
| 2 Spectrometer            | spect               |
| 3 Solvent                 | CDCl3               |
| 4 Temperature             | 296.1               |
| 5 Pulse Sequence          | zg30                |
| 6 Experiment              | 1D                  |
| 7 Number of Scans         | 4                   |
| 8 Receiver Gain           | 69                  |
| 9 Relaxation Delay        | 15.0000             |
| 10 Pulse Width            | 12.0000             |
| 11 Spectrometer Frequency | 500.35              |
| 12 Spectral Width         | 10000.0             |
| 13 Lowest Frequency       | -1922.8             |
| 14 Nucleus                | 1H                  |
| 15 Acquired Size          | 32768               |
| 16 Spectral Size          | 65536               |

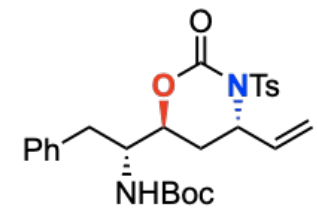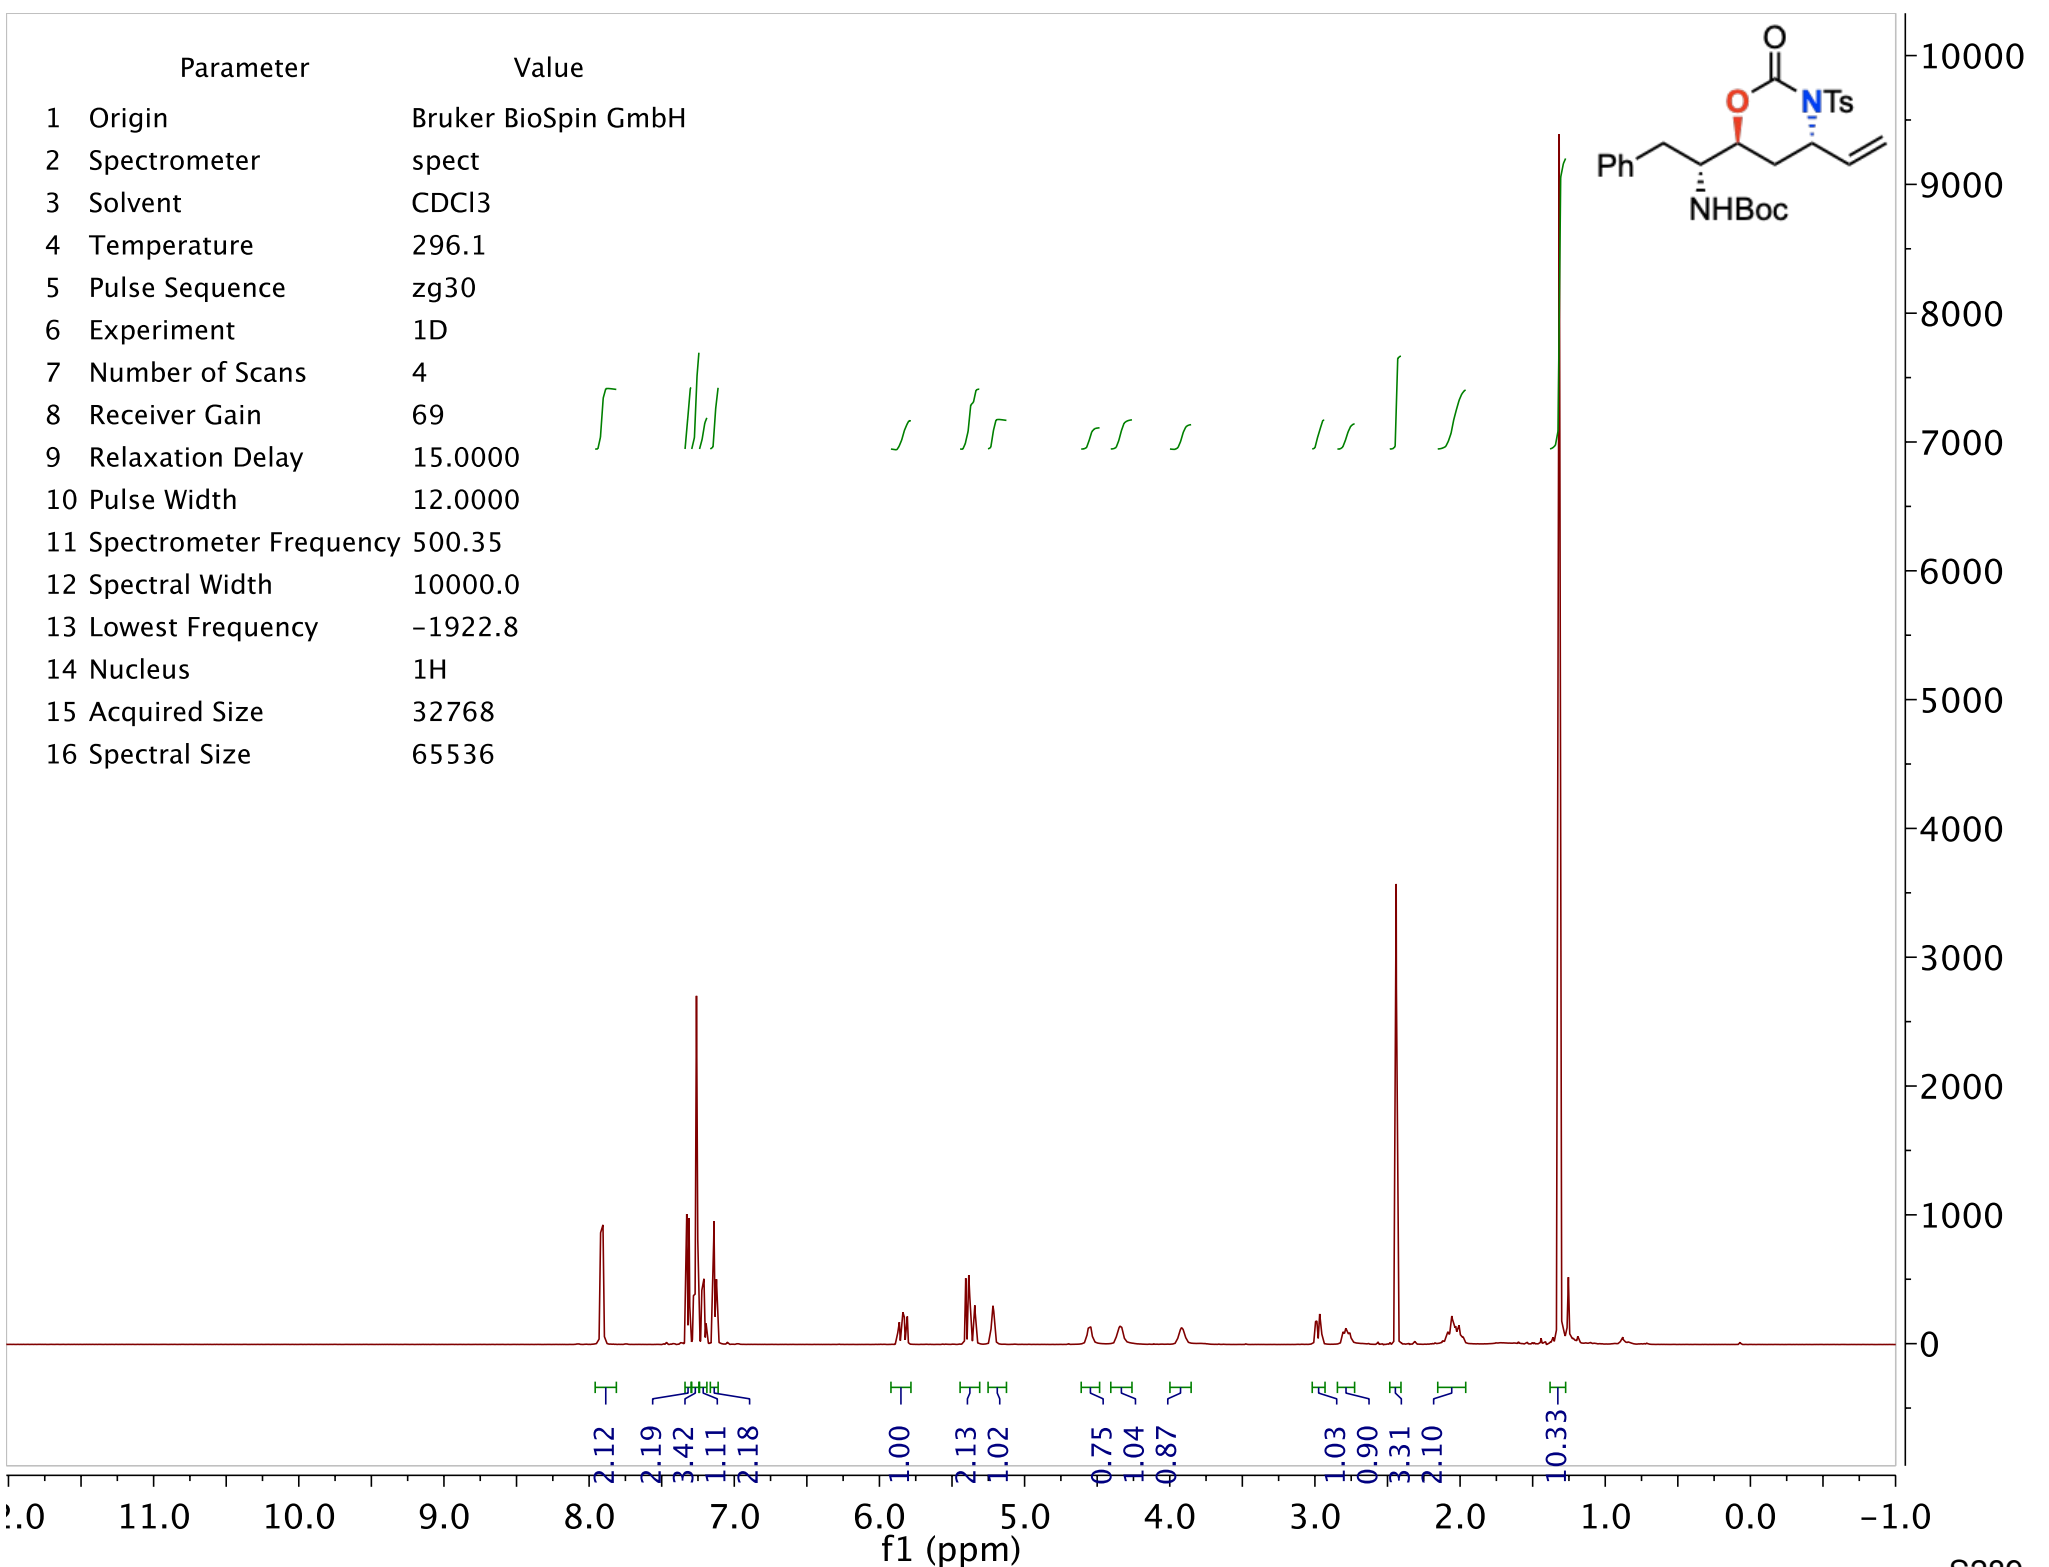

| Parameter                 | Value               |
|---------------------------|---------------------|
| 1 Origin                  | Bruker BioSpin GmbH |
| 2 Spectrometer            | spect               |
| 3 Solvent                 | CDCl3               |
| 4 Temperature             | 296.2               |
| 5 Pulse Sequence          | zgpg30              |
| 6 Experiment              | 1D                  |
| 7 Number of Scans         | 800                 |
| 8 Receiver Gain           | 191                 |
| 9 Relaxation Delay        | 1.0000              |
| 10 Pulse Width            | 10.0000             |
| 11 Spectrometer Frequency | 125.83              |
| 12 Spectral Width         | 31512.6             |
| 13 Lowest Frequency       | -1916.9             |
| 14 Nucleus                | <sup>13</sup> C     |
| 15 Acquired Size          | 32768               |
| 16 Spectral Size          | 65536               |

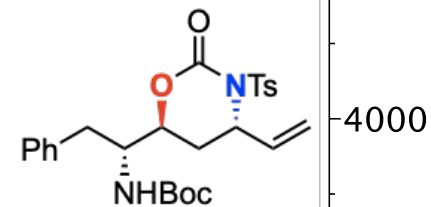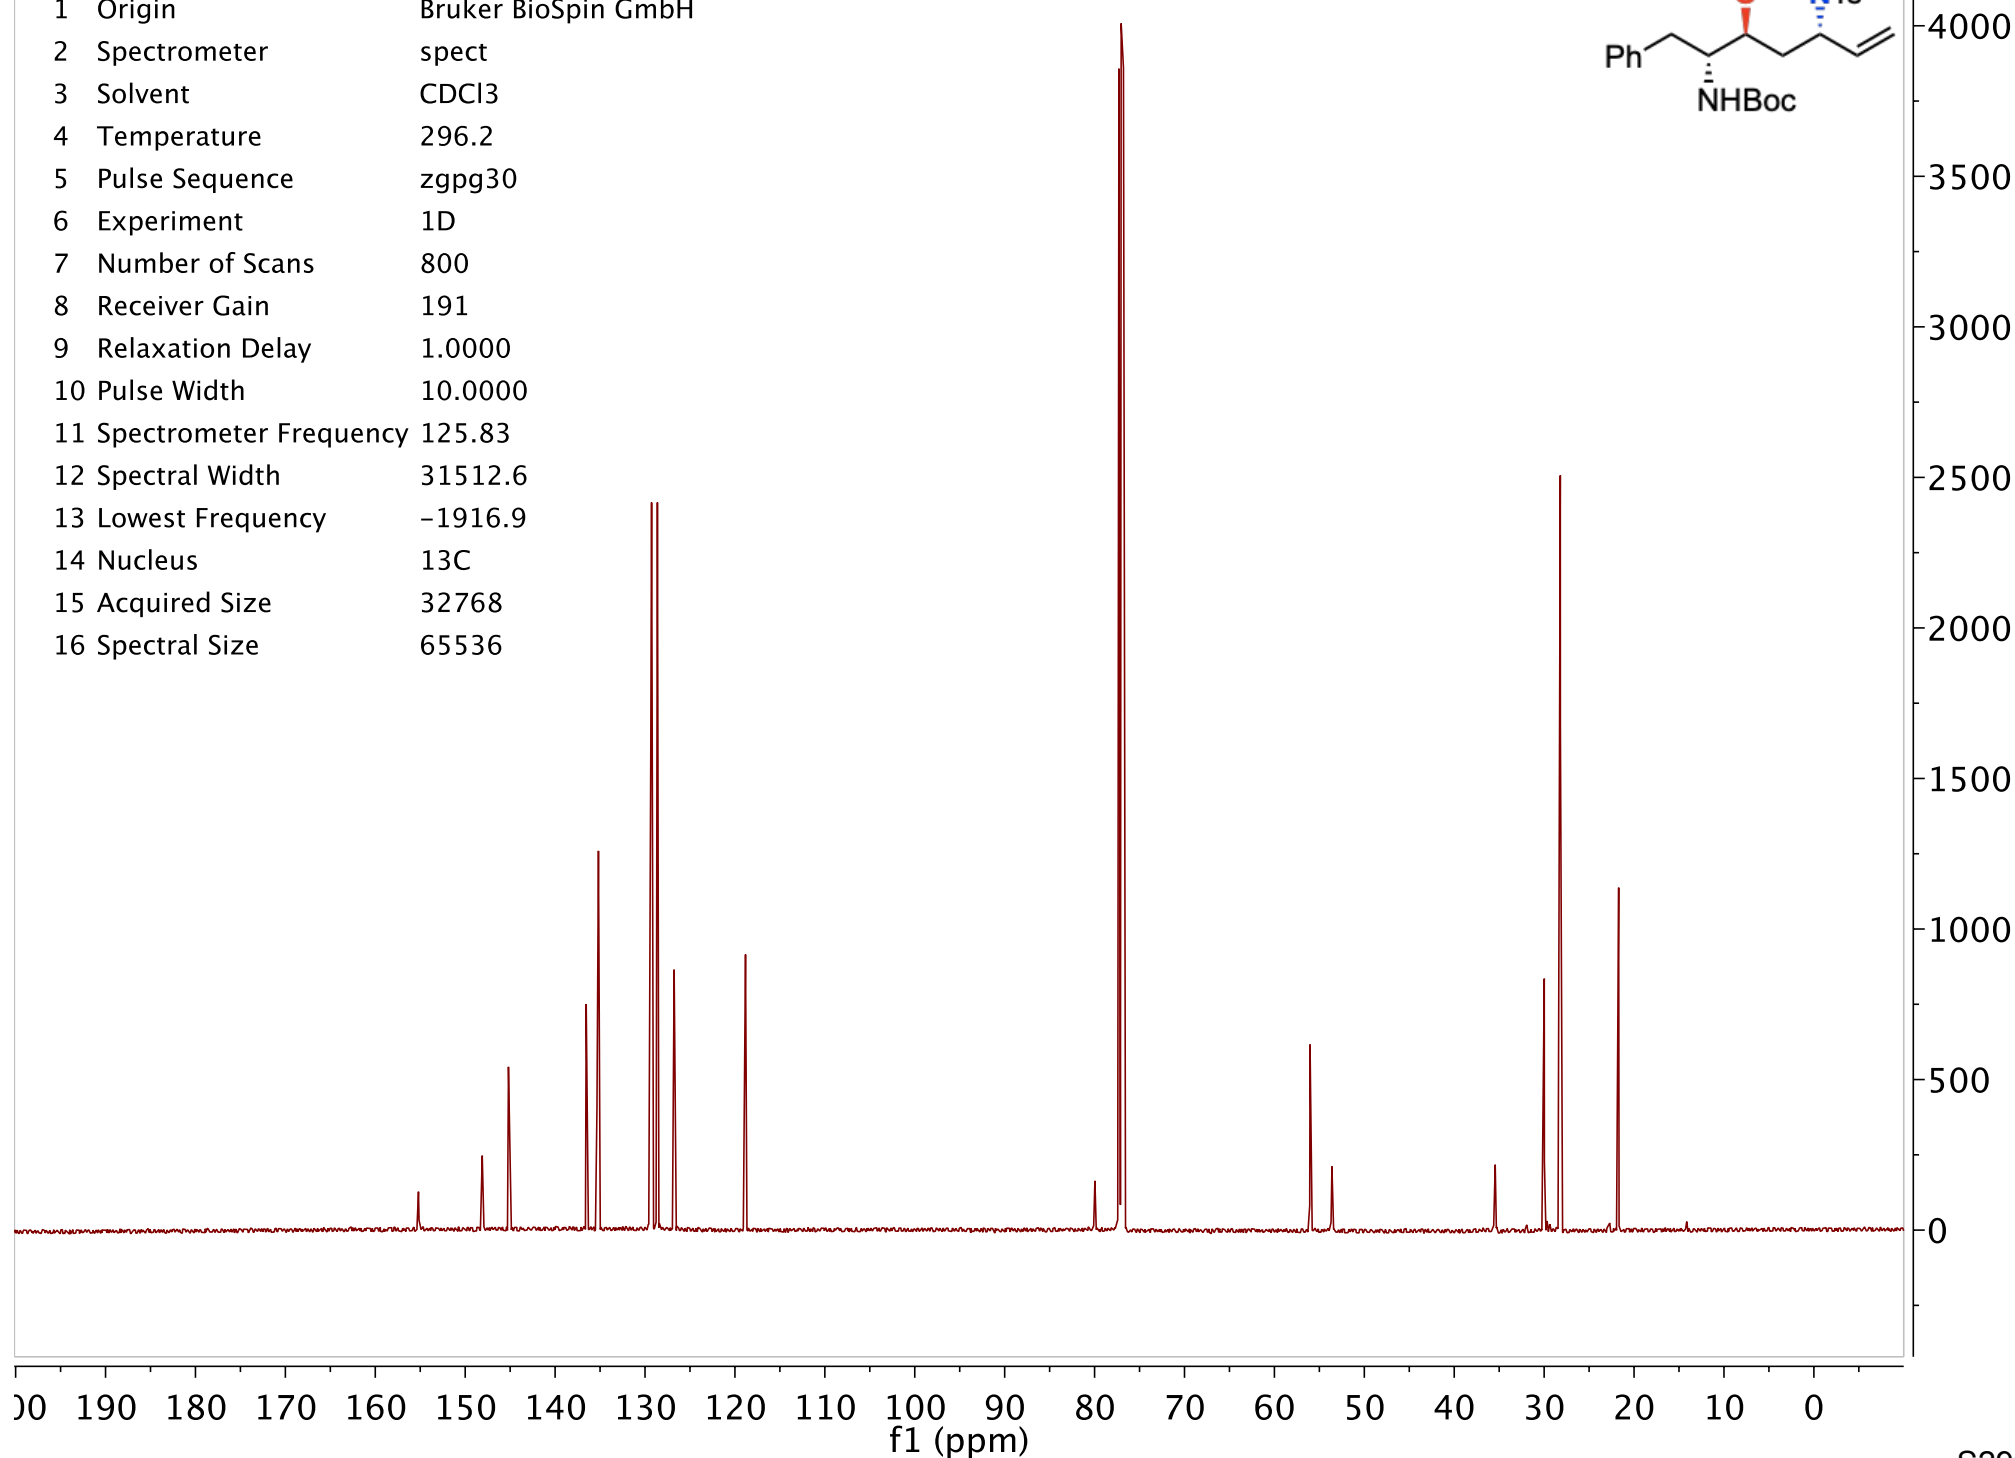

| Parameter                 | Value               |
|---------------------------|---------------------|
| 1 Origin                  | Bruker BioSpin GmbH |
| 2 Spectrometer            | spect               |
| 3 Solvent                 | CDCl3               |
| 4 Temperature             | 296.1               |
| 5 Pulse Sequence          | zg30                |
| 6 Experiment              | 1D                  |
| 7 Number of Scans         | 4                   |
| 8 Receiver Gain           | 30                  |
| 9 Relaxation Delay        | 15.0000             |
| 10 Pulse Width            | 12.0000             |
| 11 Spectrometer Frequency | 500.35              |
| 12 Spectral Width         | 10000.0             |
| 13 Lowest Frequency       | -1957.7             |
| 14 Nucleus                | 1H                  |
| 15 Acquired Size          | 32768               |
| 16 Spectral Size          | 65536               |

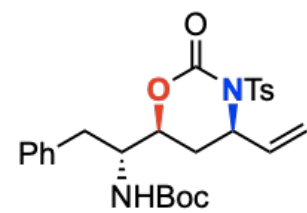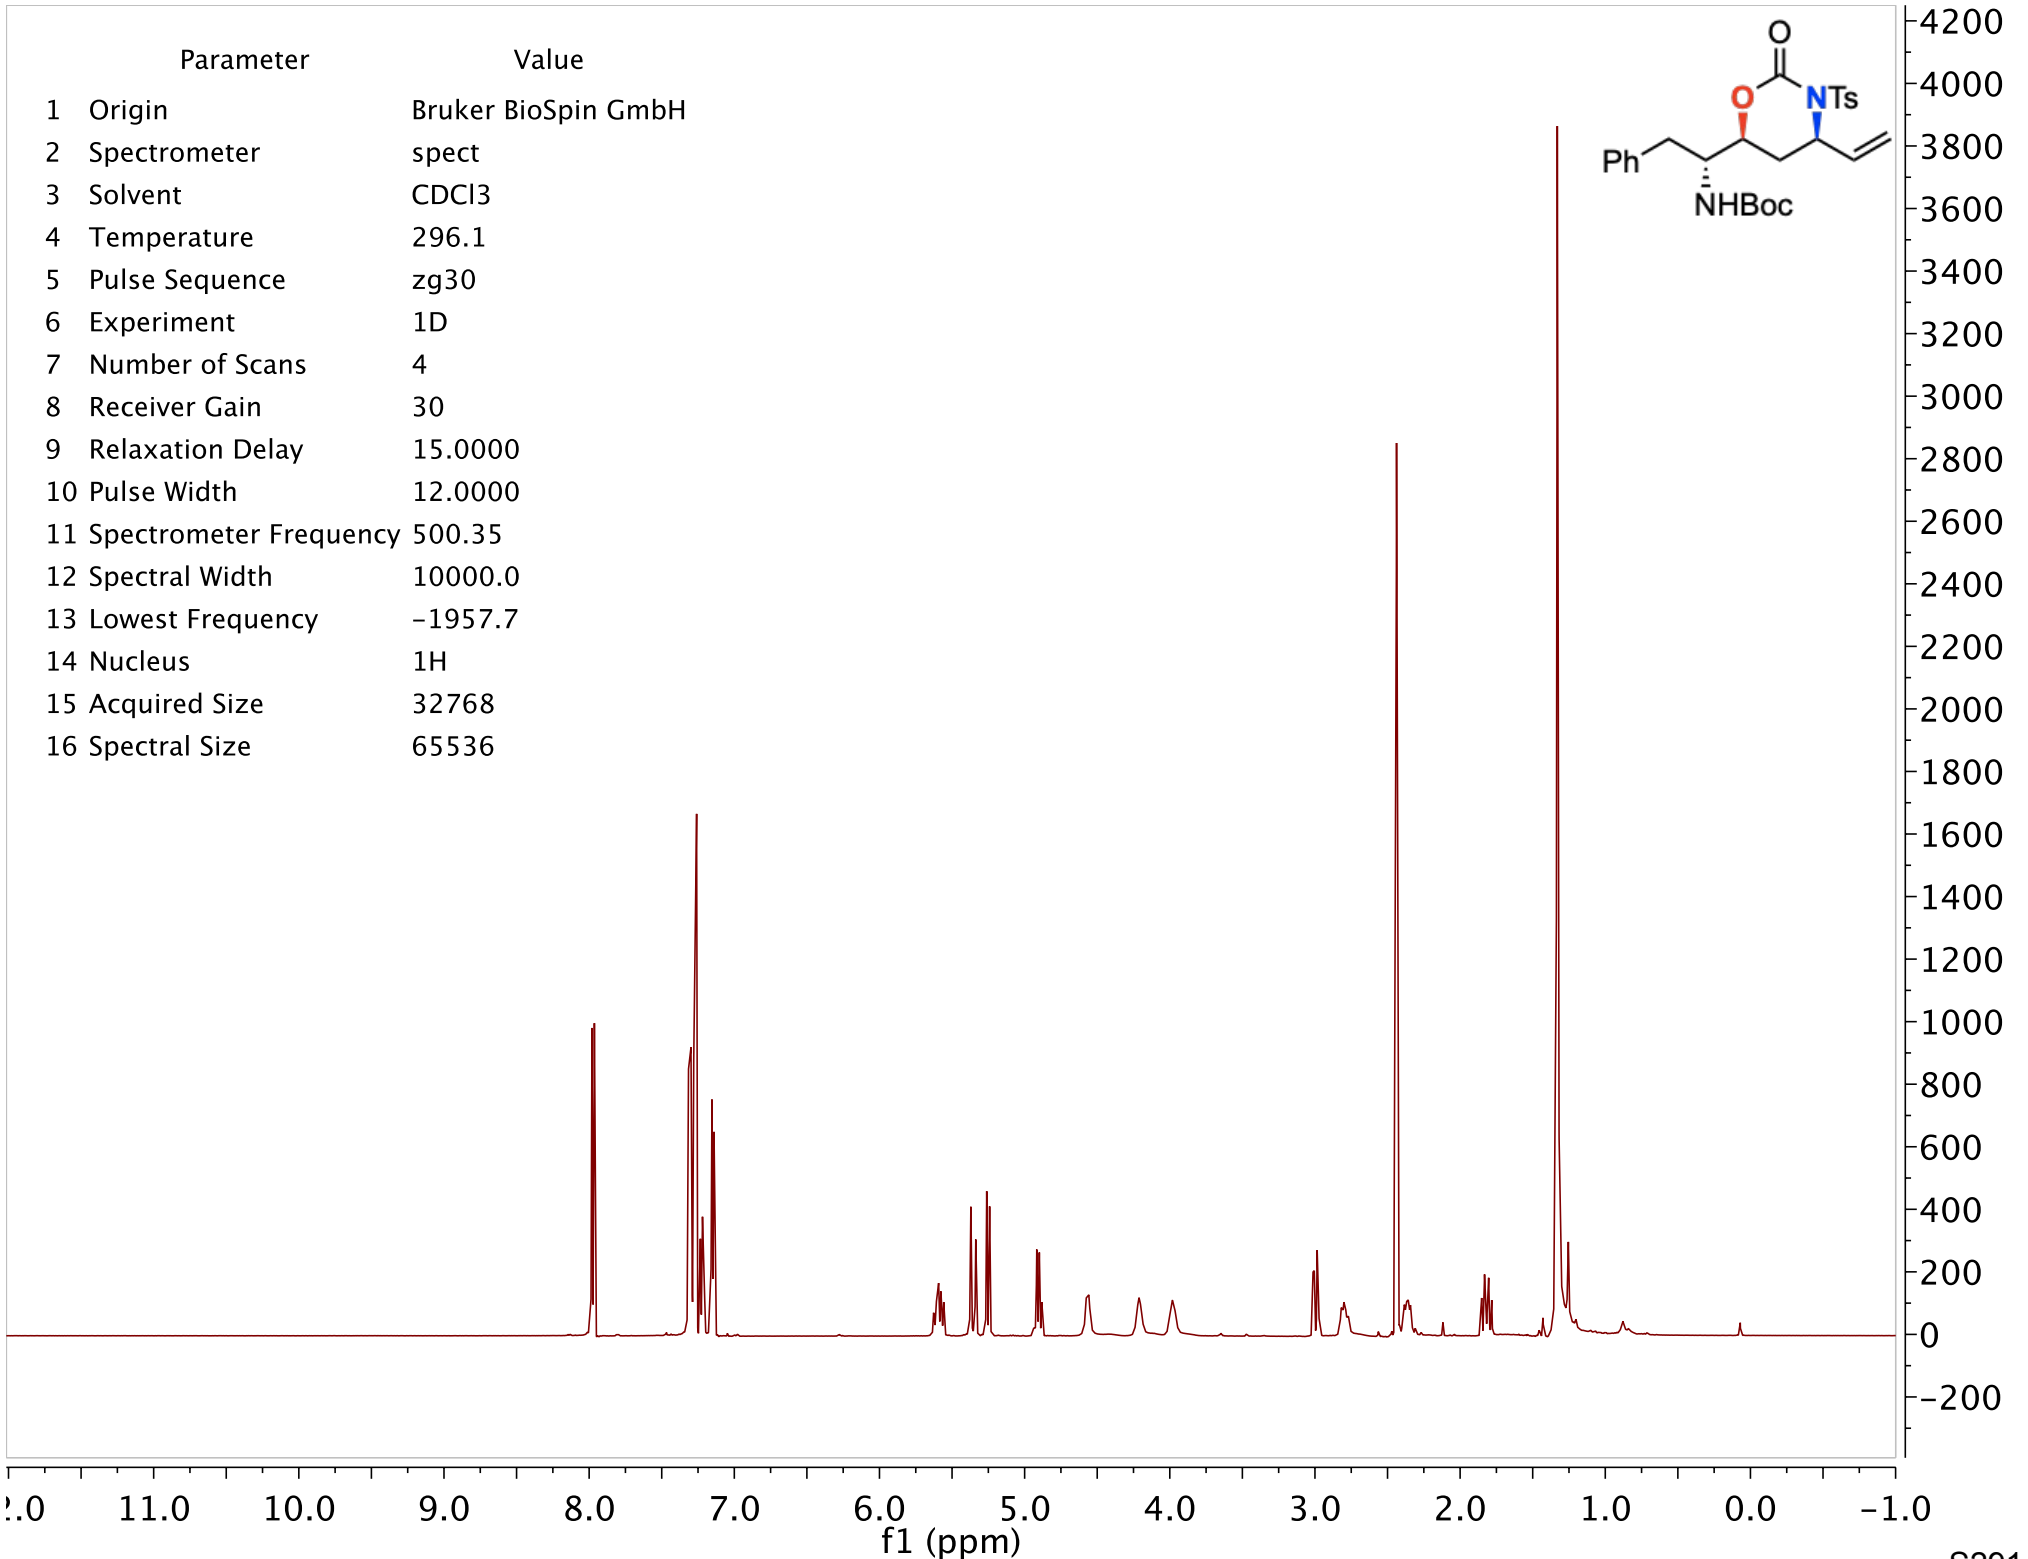

| Parameter                 | Value               |
|---------------------------|---------------------|
| 1 Origin                  | Bruker BioSpin GmbH |
| 2 Spectrometer            | spect               |
| 3 Solvent                 | CDCl3               |
| 4 Temperature             | 296.2               |
| 5 Pulse Sequence          | zgpg30              |
| 6 Experiment              | 1D                  |
| 7 Number of Scans         | 800                 |
| 8 Receiver Gain           | 191                 |
| 9 Relaxation Delay        | 1.0000              |
| 10 Pulse Width            | 10.0000             |
| 11 Spectrometer Frequency | 125.83              |
| 12 Spectral Width         | 31512.6             |
| 13 Lowest Frequency       | -1903.3             |
| 14 Nucleus                | <sup>13</sup> C     |
| 15 Acquired Size          | 32768               |
| 16 Spectral Size          | 65536               |

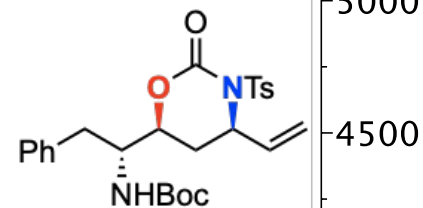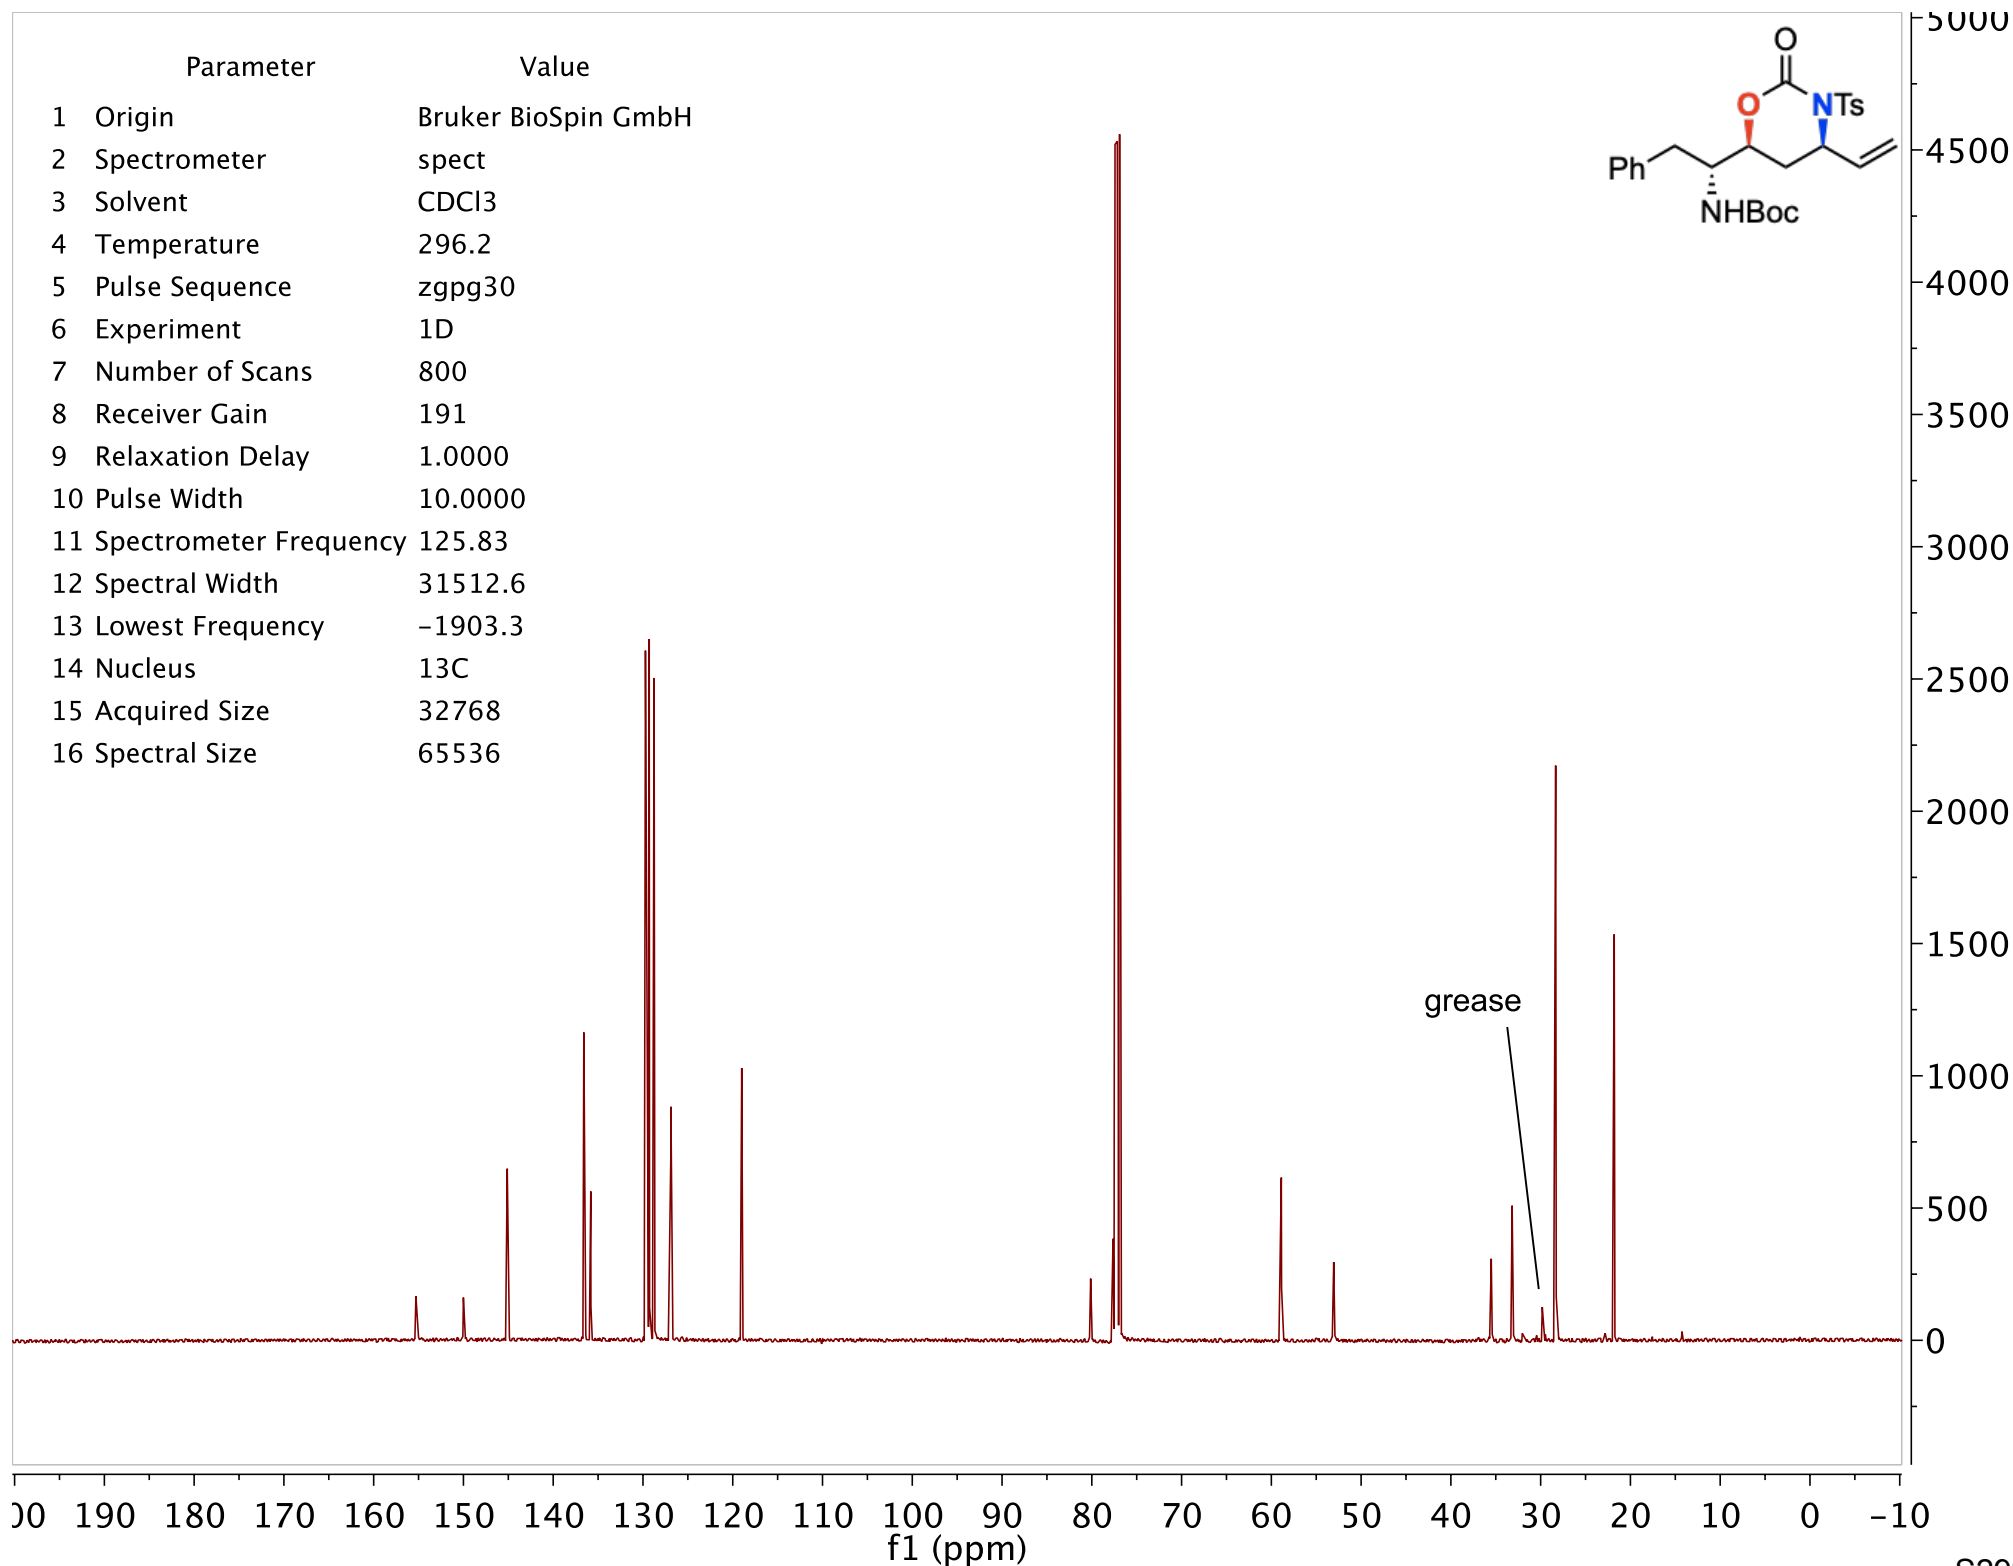

| Parameter                 | Value               |
|---------------------------|---------------------|
| 1 Origin                  | Bruker BioSpin GmbH |
| 2 Spectrometer            | spect               |
| 3 Solvent                 | CDCl3               |
| 4 Temperature             | 296.1               |
| 5 Pulse Sequence          | zg30                |
| 6 Experiment              | 1D                  |
| 7 Number of Scans         | 6                   |
| 8 Receiver Gain           | 30                  |
| 9 Relaxation Delay        | 15.0000             |
| 10 Pulse Width            | 12.0000             |
| 11 Spectrometer Frequency | 500.35              |
| 12 Spectral Width         | 10000.0             |
| 13 Lowest Frequency       | -1922.8             |
| 14 Nucleus                | 1H                  |
| 15 Acquired Size          | 32768               |
| 16 Spectral Size          | 65536               |

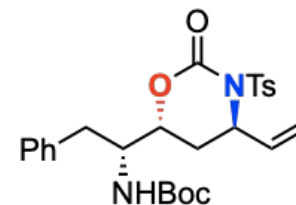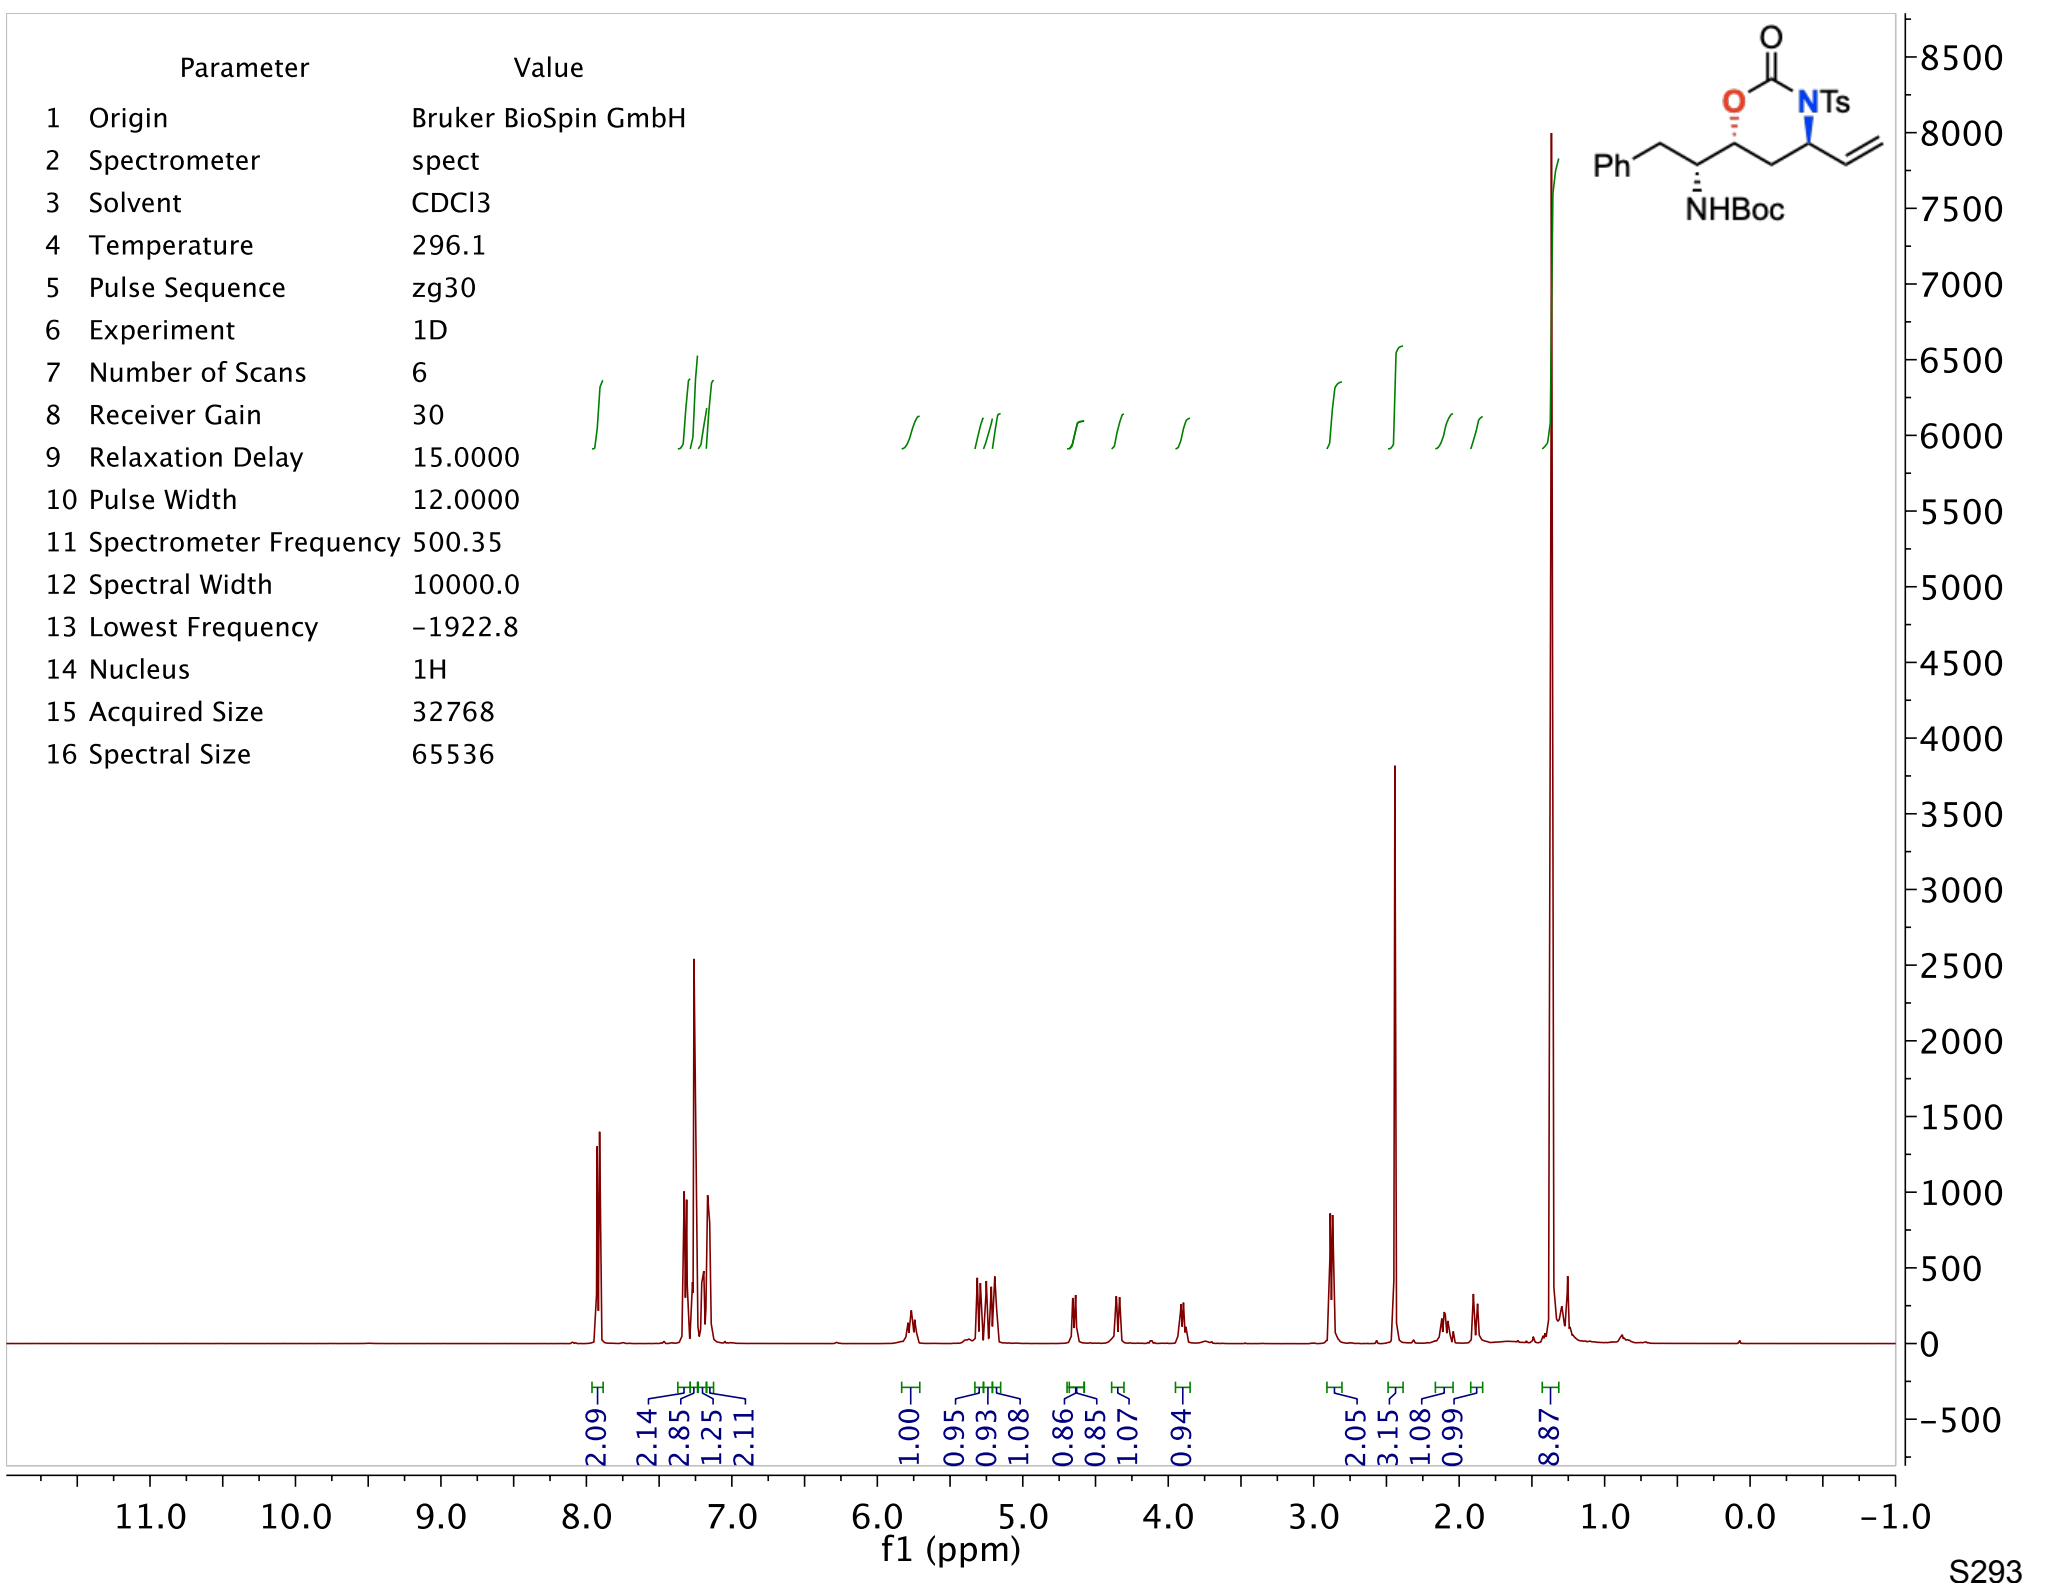

| Parameter                 | Value               |
|---------------------------|---------------------|
| 1 Origin                  | Bruker BioSpin GmbH |
| 2 Spectrometer            | spect               |
| 3 Solvent                 | CDCl3               |
| 4 Temperature             | 296.2               |
| 5 Pulse Sequence          | zgpg30              |
| 6 Experiment              | 1D                  |
| 7 Number of Scans         | 800                 |
| 8 Receiver Gain           | 191                 |
| 9 Relaxation Delay        | 1.0000              |
| 10 Pulse Width            | 10.0000             |
| 11 Spectrometer Frequency | 125.83              |
| 12 Spectral Width         | 31512.6             |
| 13 Lowest Frequency       | -1902.8             |
| 14 Nucleus                | <sup>13</sup> C     |
| 15 Acquired Size          | 32768               |
| 16 Spectral Size          | 65536               |

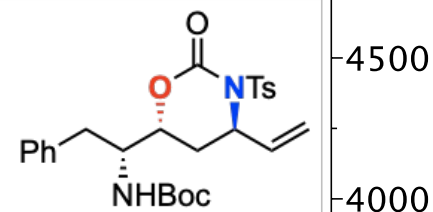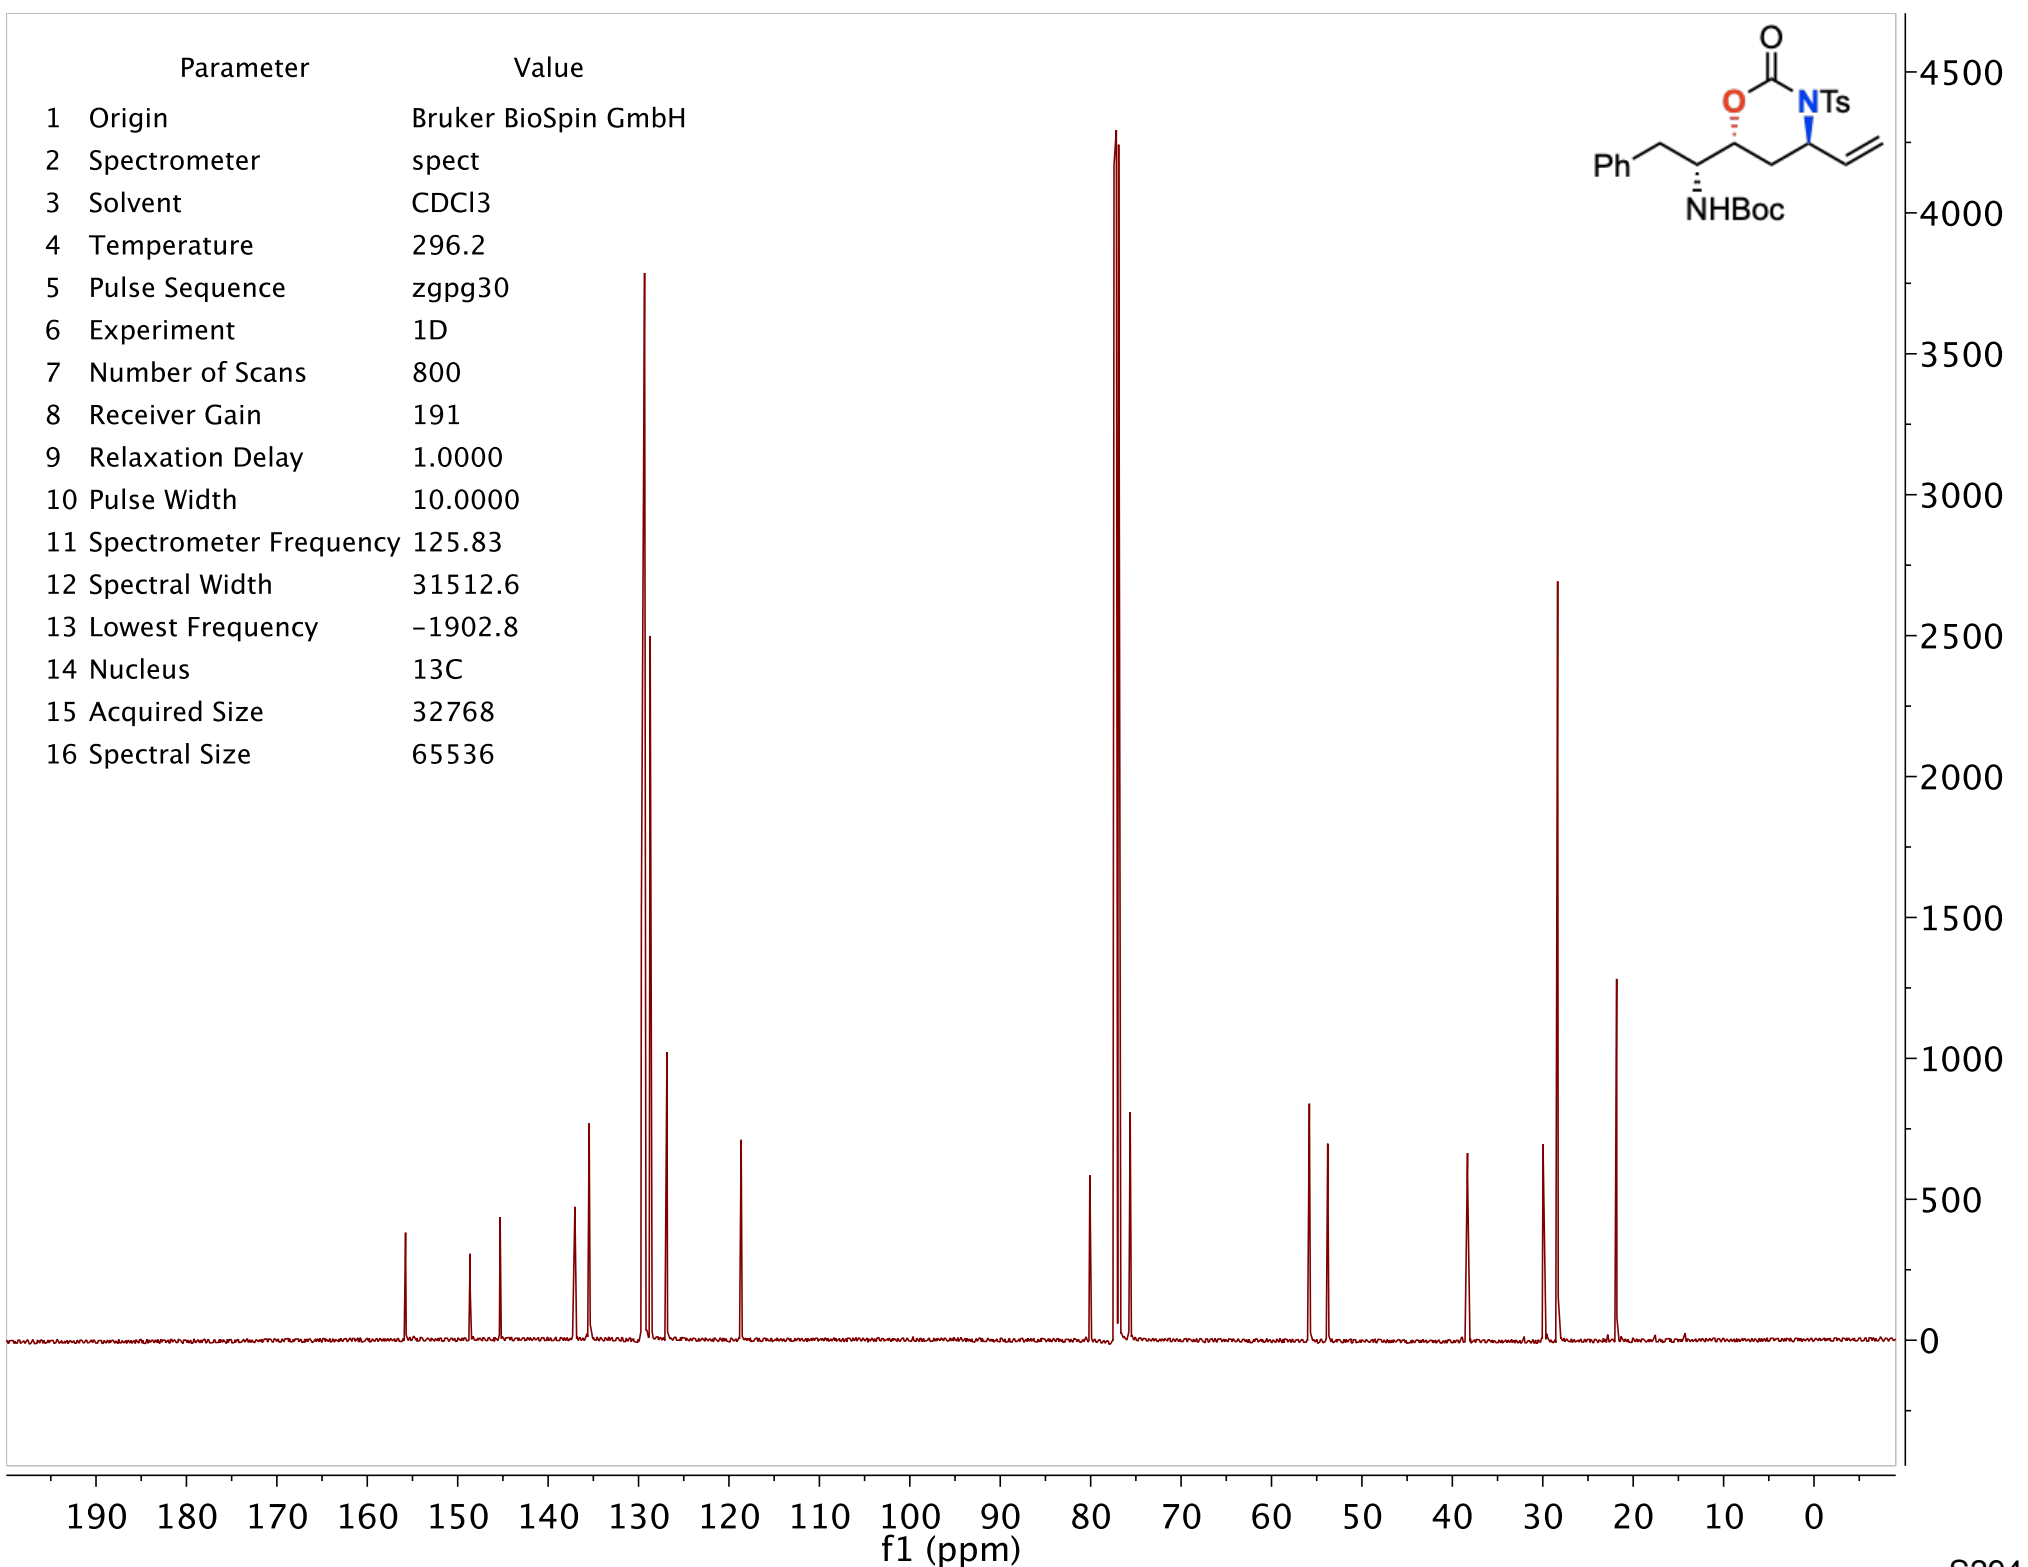



| Parameter                 | Value               |
|---------------------------|---------------------|
| 1 Origin                  | Bruker BioSpin GmbH |
| 2 Spectrometer            | spect               |
| 3 Solvent                 | CDCl3               |
| 4 Temperature             | 296.2               |
| 5 Pulse Sequence          | zg30                |
| 6 Experiment              | 1D                  |
| 7 Number of Scans         | 4                   |
| 8 Receiver Gain           | 191                 |
| 9 Relaxation Delay        | 15.0000             |
| 10 Pulse Width            | 12.0000             |
| 11 Spectrometer Frequency | 500.35              |
| 12 Spectral Width         | 10000.0             |
| 13 Lowest Frequency       | -1923.0             |
| 14 Nucleus                | 1H                  |
| 15 Acquired Size          | 32768               |
| 16 Spectral Size          | 65536               |

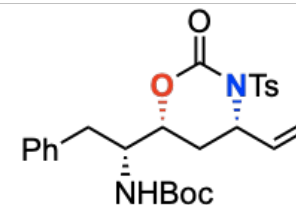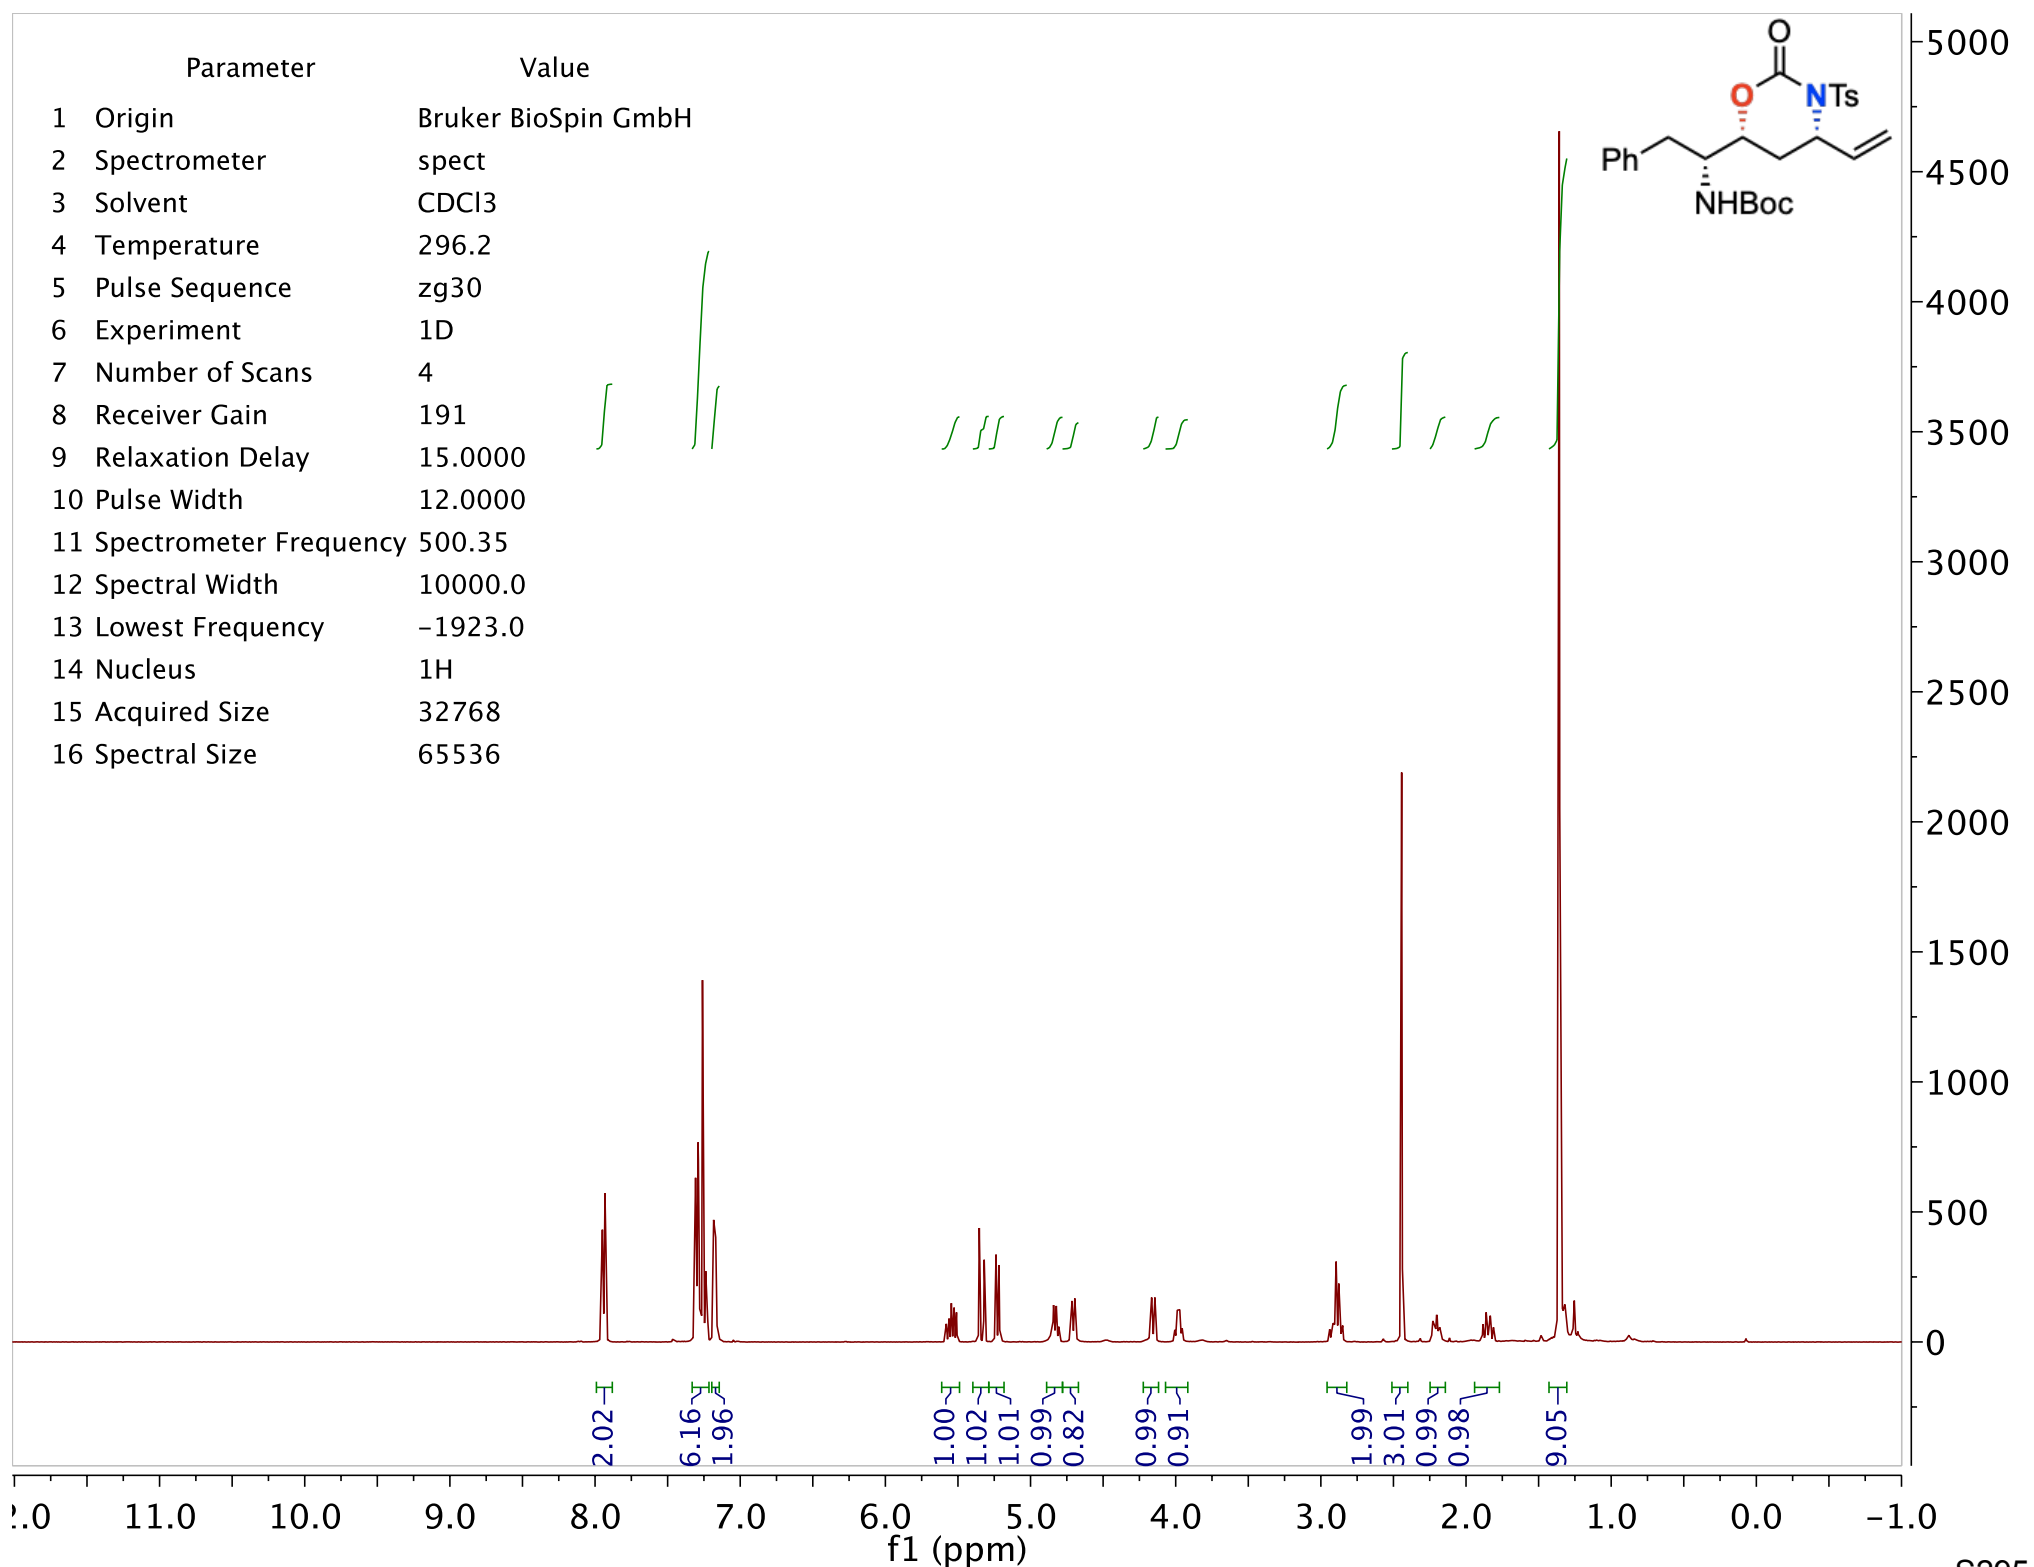

| Parameter                 | Value               |
|---------------------------|---------------------|
| 1 Origin                  | Bruker BioSpin GmbH |
| 2 Spectrometer            | spect               |
| 3 Solvent                 | CDCl3               |
| 4 Temperature             | 296.1               |
| 5 Pulse Sequence          | zgpg30              |
| 6 Experiment              | 1D                  |
| 7 Number of Scans         | 800                 |
| 8 Receiver Gain           | 191                 |
| 9 Relaxation Delay        | 1.0000              |
| 10 Pulse Width            | 10.0000             |
| 11 Spectrometer Frequency | 125.83              |
| 12 Spectral Width         | 31512.6             |
| 13 Lowest Frequency       | -1903.9             |
| 14 Nucleus                | 13C                 |
| 15 Acquired Size          | 32768               |
| 16 Spectral Size          | 65536               |

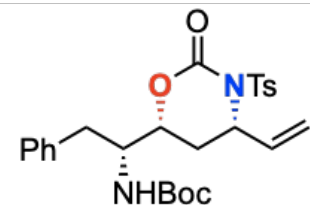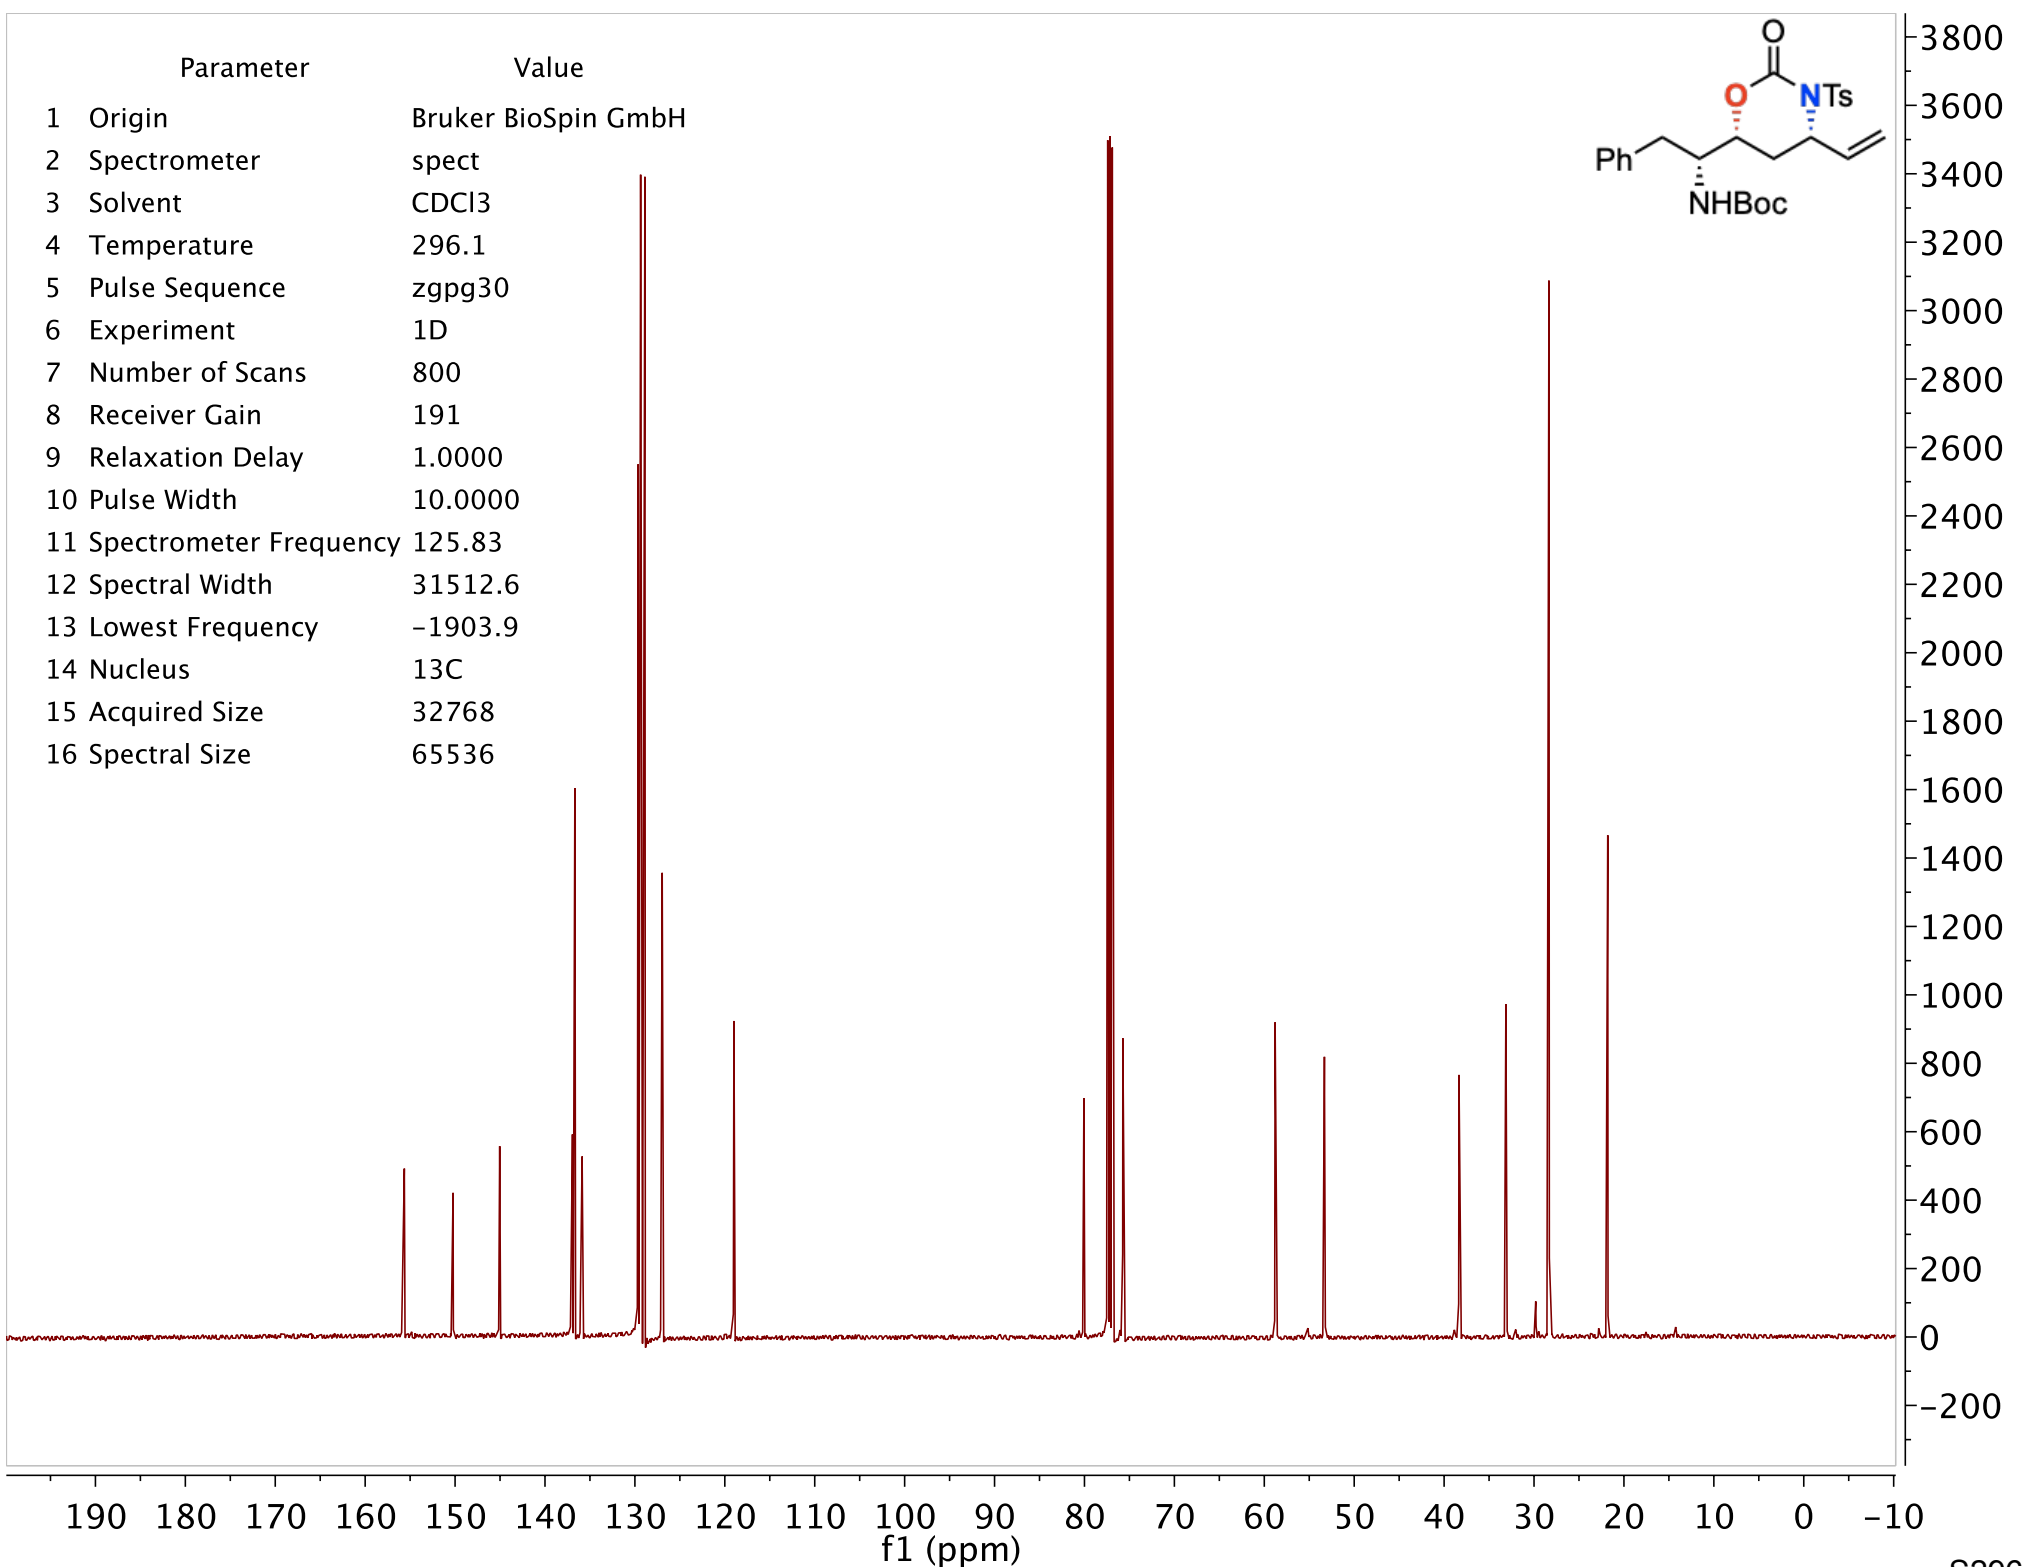

| Parameter                 | Value   |
|---------------------------|---------|
| 1 Origin                  | Varian  |
| 2 Spectrometer            | inova   |
| 3 Solvent                 | CDCl3   |
| 4 Temperature             | 20.0    |
| 5 Pulse Sequence          | s2pul   |
| 6 Experiment              | 1D      |
| 7 Number of Scans         | 6       |
| 8 Receiver Gain           | 26      |
| 9 Relaxation Delay        | 15.0000 |
| 10 Pulse Width            | 7.0000  |
| 11 Spectrometer Frequency | 500.06  |
| 12 Spectral Width         | 8000.0  |
| 13 Lowest Frequency       | -1499.6 |
| 14 Nucleus                | 1H      |
| 15 Acquired Size          | 32768   |
| 16 Spectral Size          | 65536   |

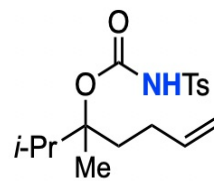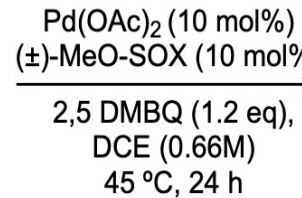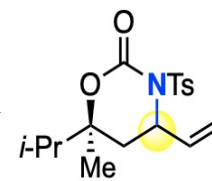

80% yield;  
1.1:1 dr

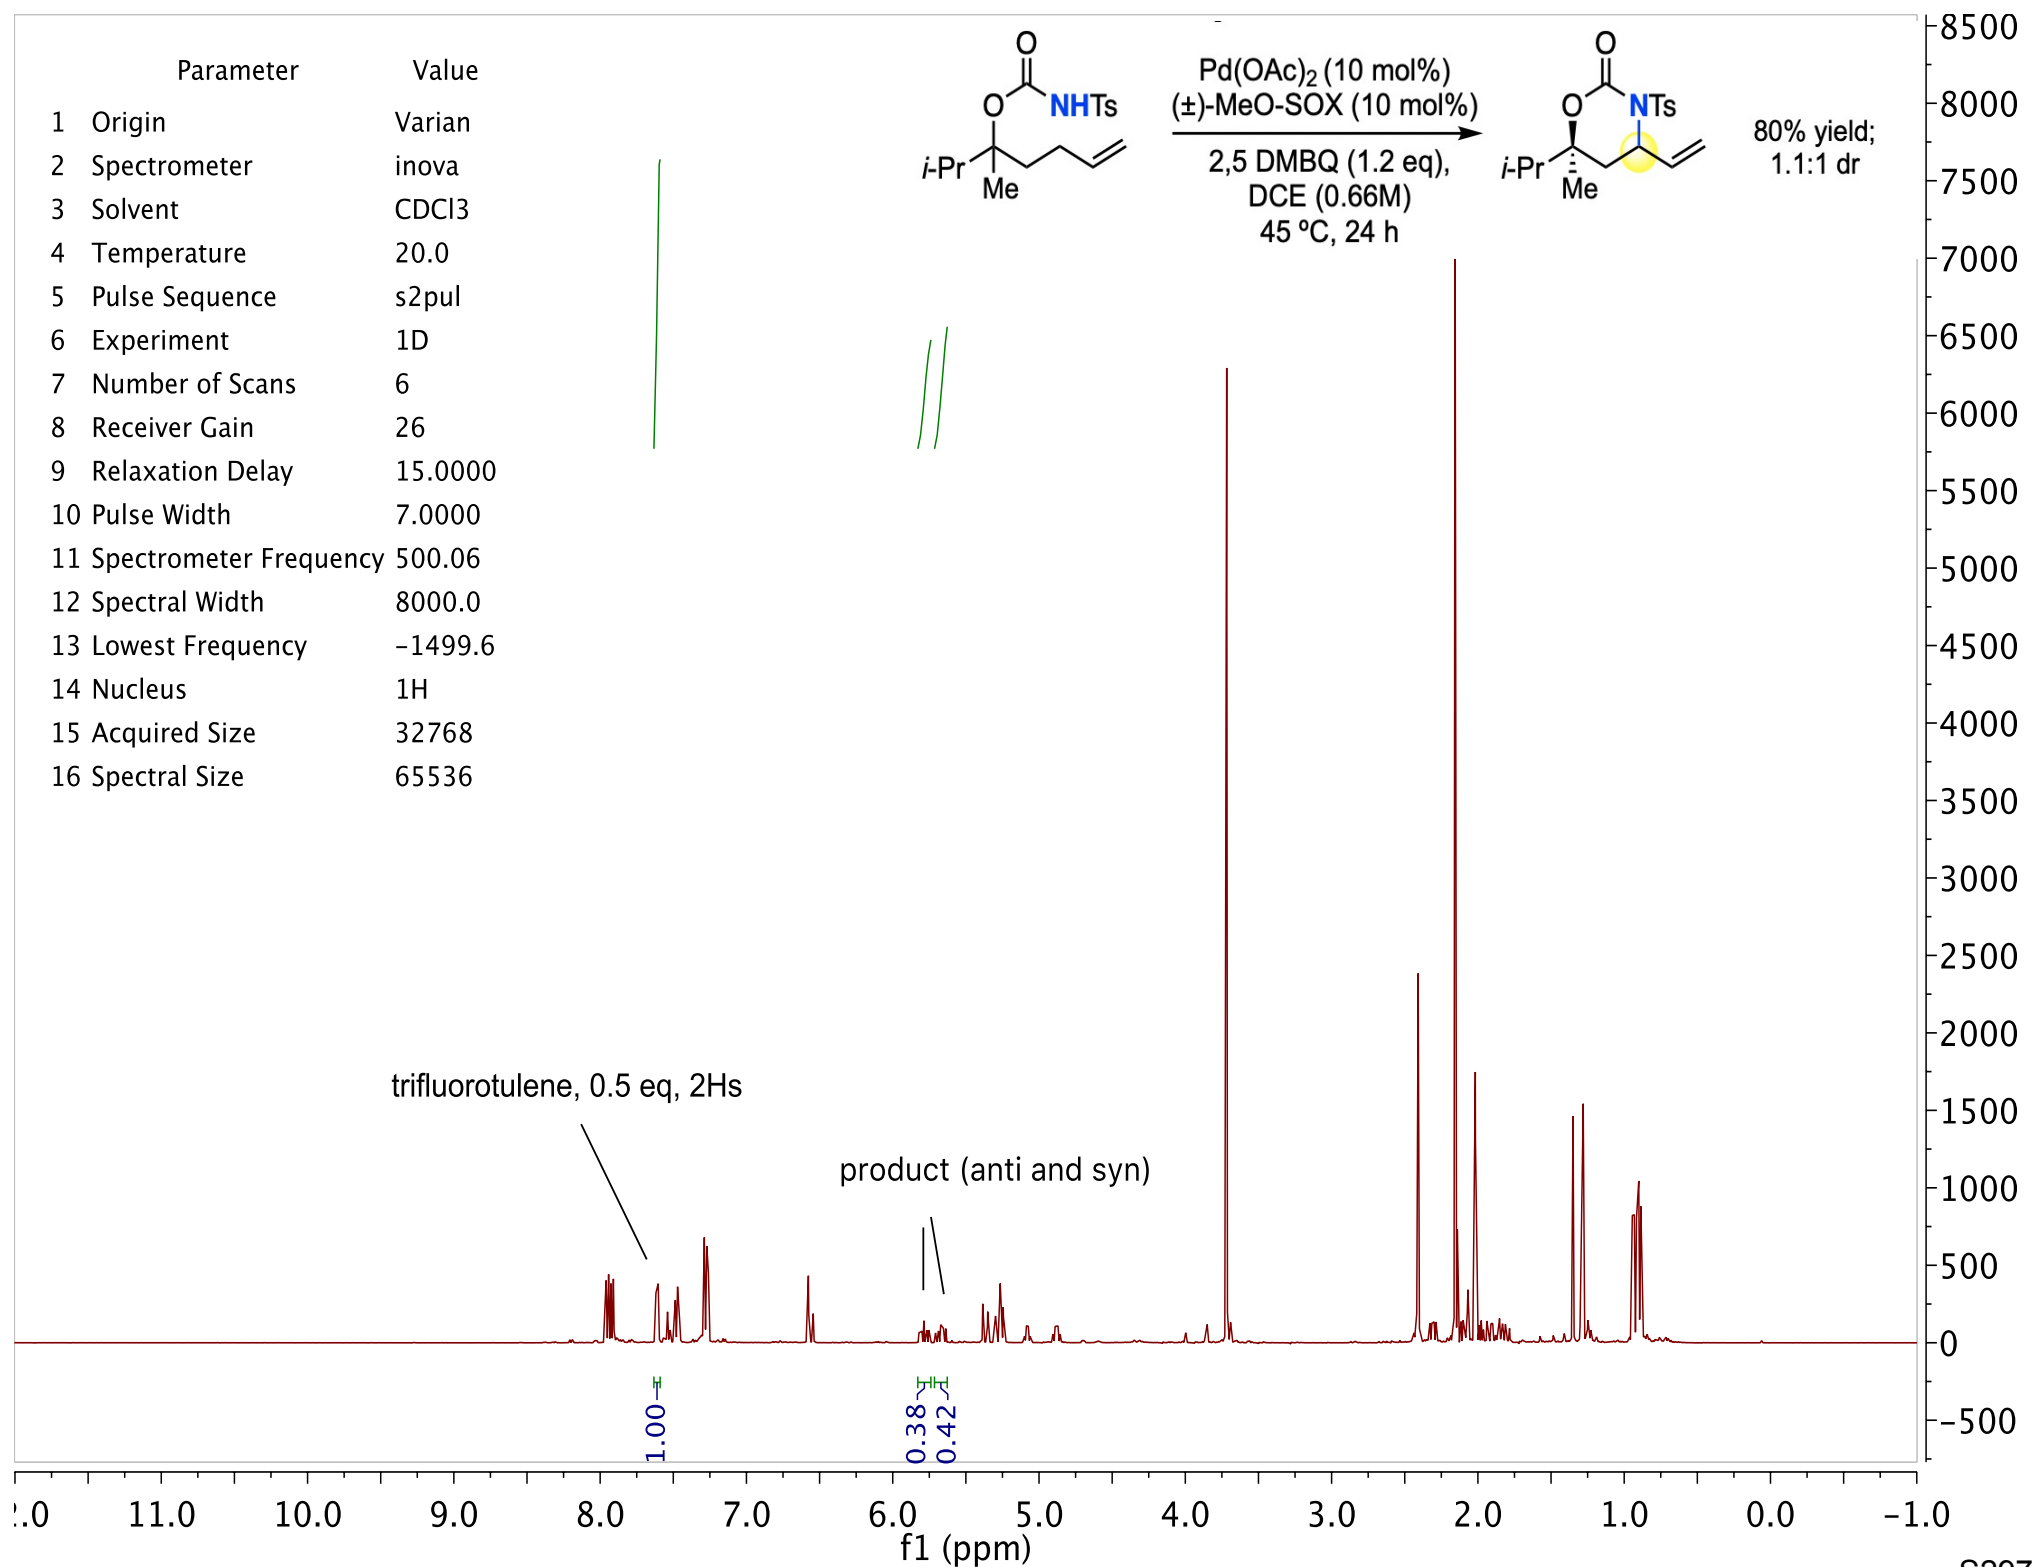

| Parameter                 | Value   |
|---------------------------|---------|
| 1 Origin                  | Varian  |
| 2 Spectrometer            | inova   |
| 3 Solvent                 | CDCl3   |
| 4 Temperature             | 20.0    |
| 5 Pulse Sequence          | s2pul   |
| 6 Experiment              | 1D      |
| 7 Number of Scans         | 6       |
| 8 Receiver Gain           | 28      |
| 9 Relaxation Delay        | 15.0000 |
| 10 Pulse Width            | 7.0000  |
| 11 Spectrometer Frequency | 500.06  |
| 12 Spectral Width         | 8000.0  |
| 13 Lowest Frequency       | -1513.1 |
| 14 Nucleus                | 1H      |
| 15 Acquired Size          | 32768   |
| 16 Spectral Size          | 65536   |

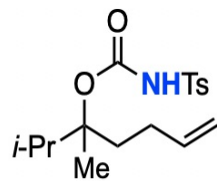

$\text{Pd(OAc)}_2$  (10 mol%)  
 $(\pm)\text{-CF}_3\text{-SOX}$  (10 mol%)  
 BQ (1.6 eq),  
 DCE (0.66M)  
 45 °C, 24 h

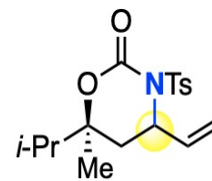

61% yield;  
1.7:1 dr

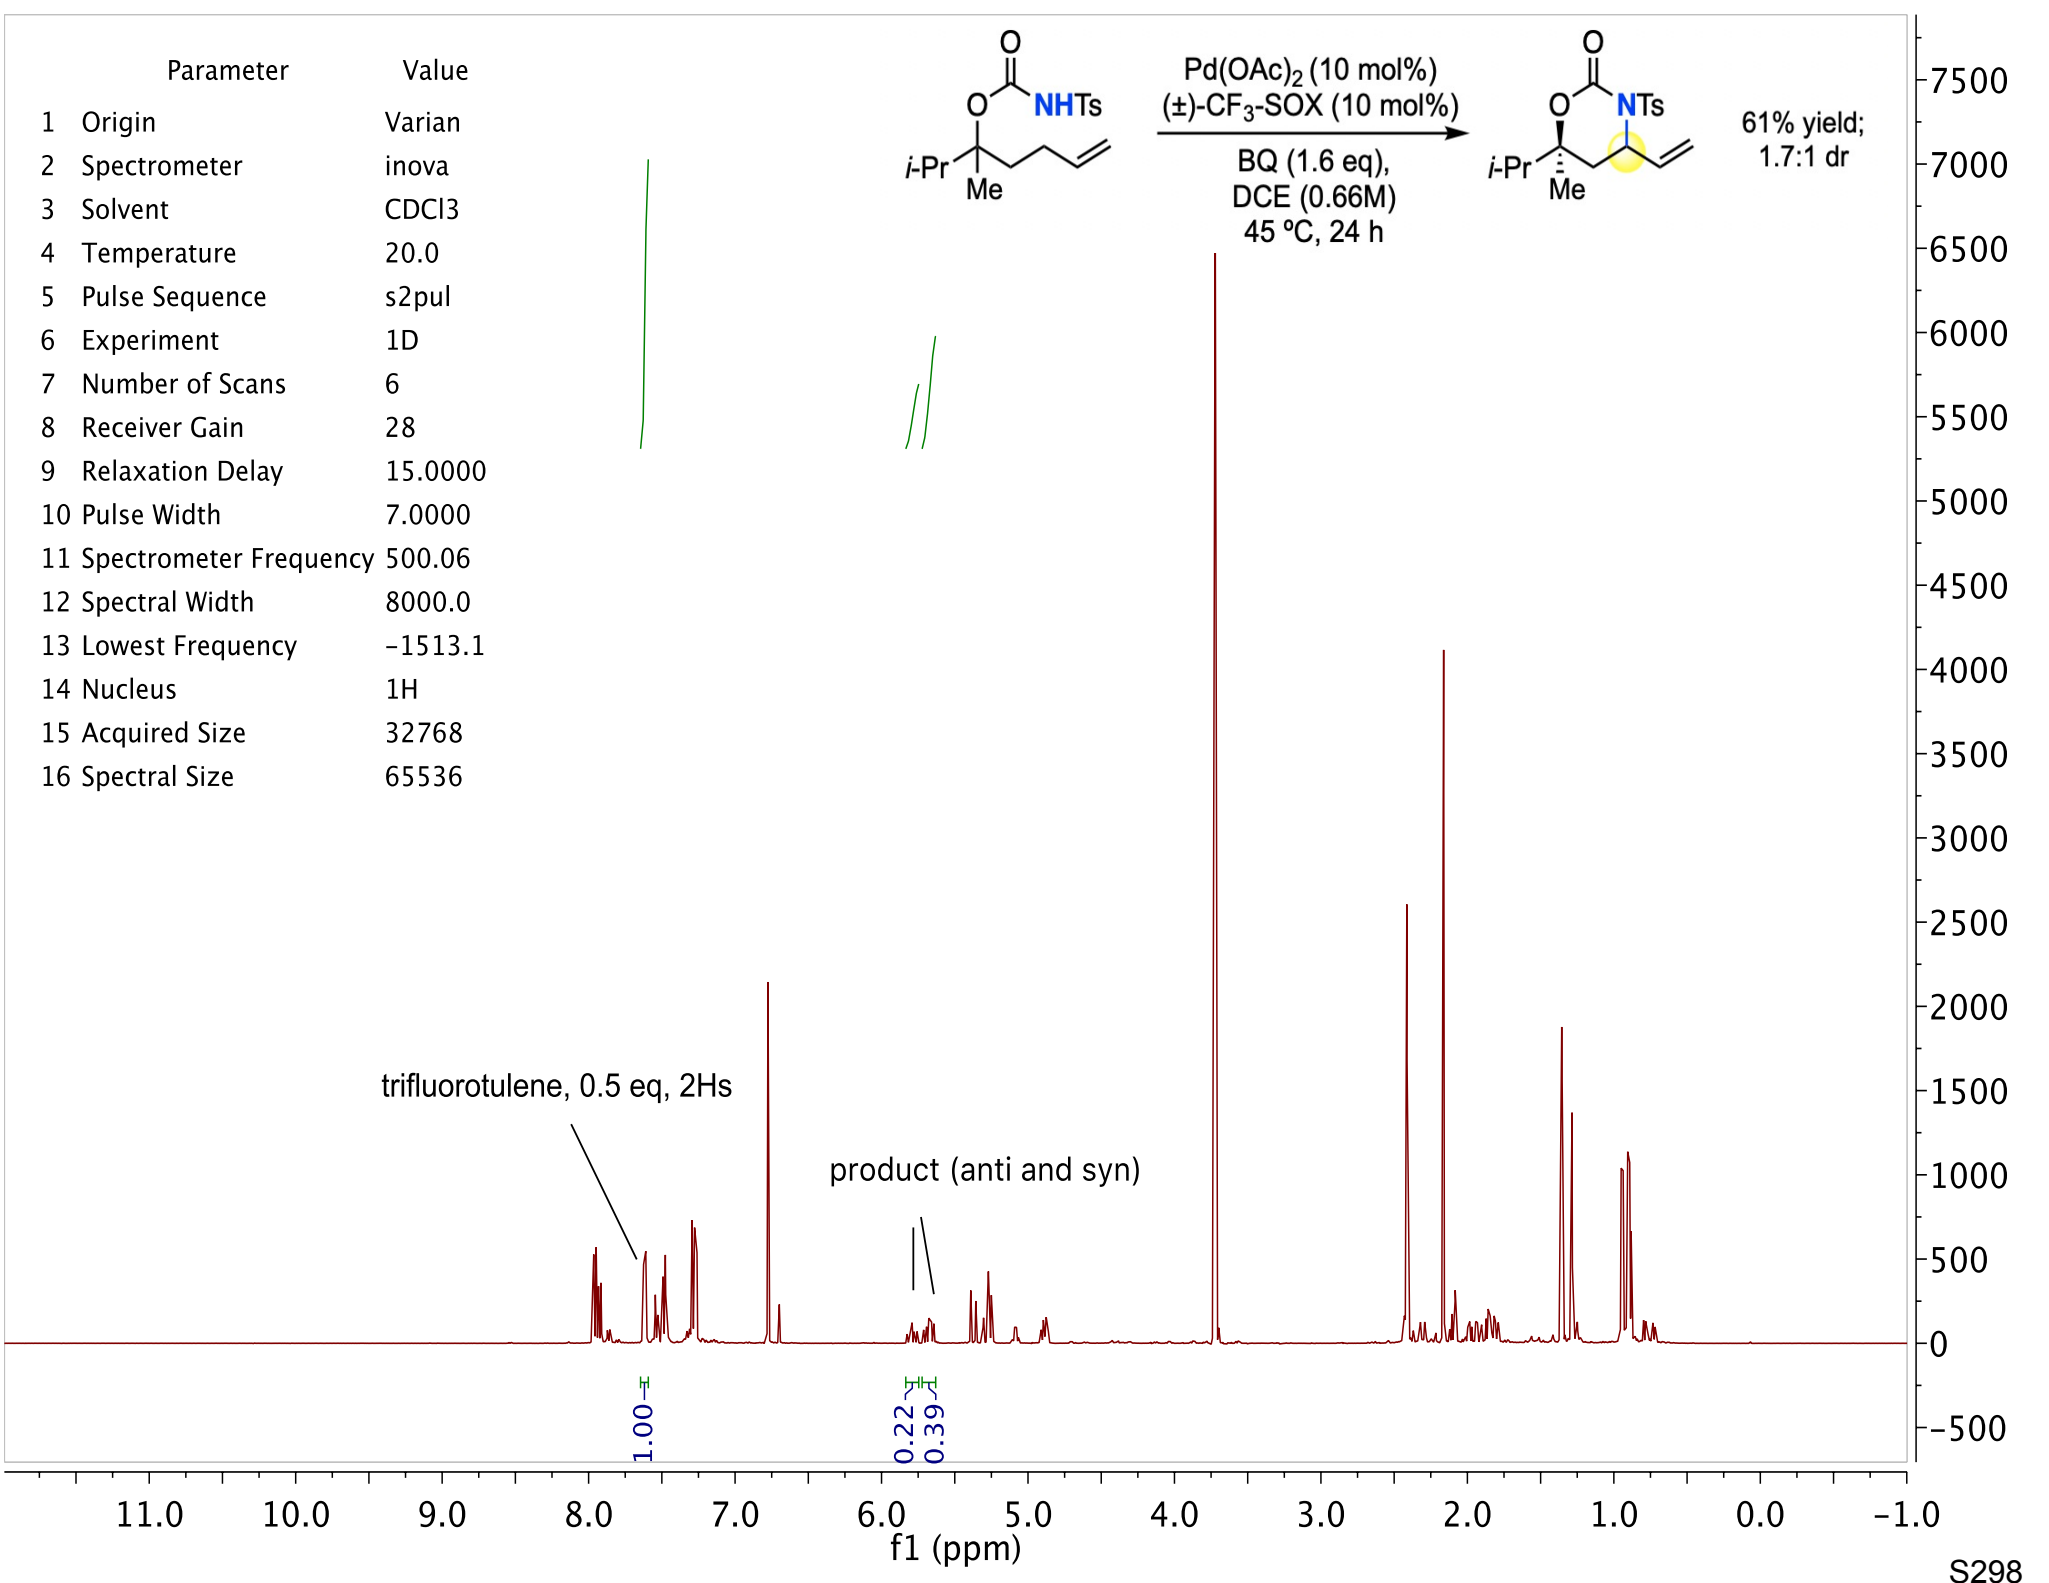

```

=====
Injection Date   : 4/18/2019 3:18:49 PM      Seq. Line :    2
Sample Name     : antirac                    Location  : Vial 2
Acq. Operator   : ca                        Inj       :    1
Acq. Instrument : Instrument 1                Inj Volume: 5 µl
Different Inj Volume from Sequence !      Actual Inj Volume : 8 µl
Acq. Method     : C:\HPCHEM\1\METHODS\NORMAL\CHIRAL\OJ\10IPARM.M
Last changed    : 4/18/2019 2:39:46 PM by ca
Analysis Method : C:\HPCHEM\1\METHODS\NORMAL\CHIRAL\OJ\10IPARM.M
Last changed    : 4/19/2019 4:08:42 PM by ca
                  (modified after loading)

```

**1a racemic standard**

```

Chiralcel OJ-H, 1.0 ml/min, 30C
Normal Phase Chiral
90:10 Hexanes:iPrOH

```

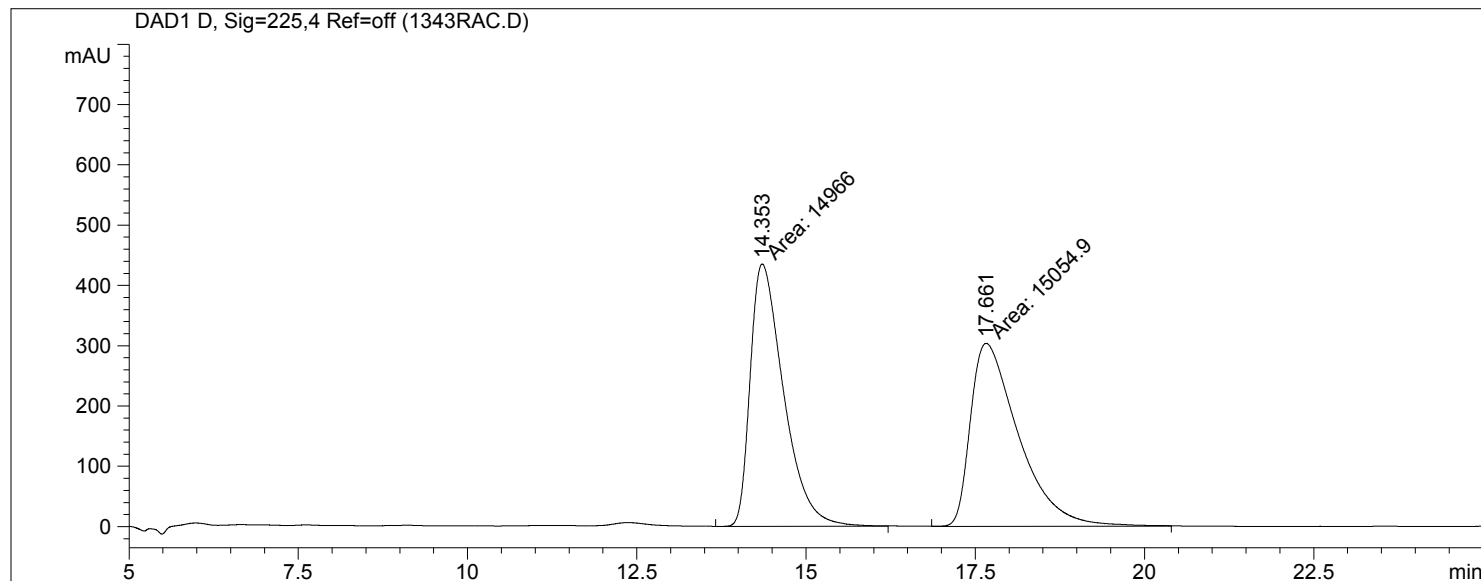

```

=====
Area Percent Report
=====

```

```

Sorted By      :      Signal
Multiplier     :      1.0000
Dilution      :      1.0000
Use Multiplier & Dilution Factor with ISTDs

```

Signal 1: DAD1 D, Sig=225,4 Ref=off

| Peak # | RetTime [min] | Type | Width [min] | Area [mAU*s] | Height [mAU] | Area %  |
|--------|---------------|------|-------------|--------------|--------------|---------|
| 1      | 14.353        | MM   | 0.5728      | 1.49660e4    | 435.48294    | 49.8521 |
| 2      | 17.661        | MM   | 0.8254      | 1.50549e4    | 304.00742    | 50.1479 |

```
Totals :                3.00209e4  739.49036
```

Results obtained with standard integrator!

```

=====
*** End of Report ***
=====

```

```

=====
Injection Date   : 4/18/2019 2:47:44 PM      Seq. Line :    1
Sample Name     : RM1343anti                 Location  : Vial 1
Acq. Operator  : ca                          Inj       :    1
Acq. Instrument : Instrument 1                Inj Volume: 5 µl
Acq. Method    : C:\HPCHEM\1\METHODS\NORMAL\CHIRAL\OJ\10IPARM.M
Last changed   : 4/18/2019 2:39:46 PM by ca
Analysis Method: C:\HPCHEM\1\METHODS\NORMAL\CHIRAL\OJ\10IPARM.M
Last changed   : 4/19/2019 4:10:38 PM by ca
                (modified after loading)

```

**1a (with (-)-(S)- MeO-SOX)**

```

Chiralcel OJ-H, 1.0 ml/min, 30C
Normal Phase Chiral
90:10 Hexanes:iPrOH

```

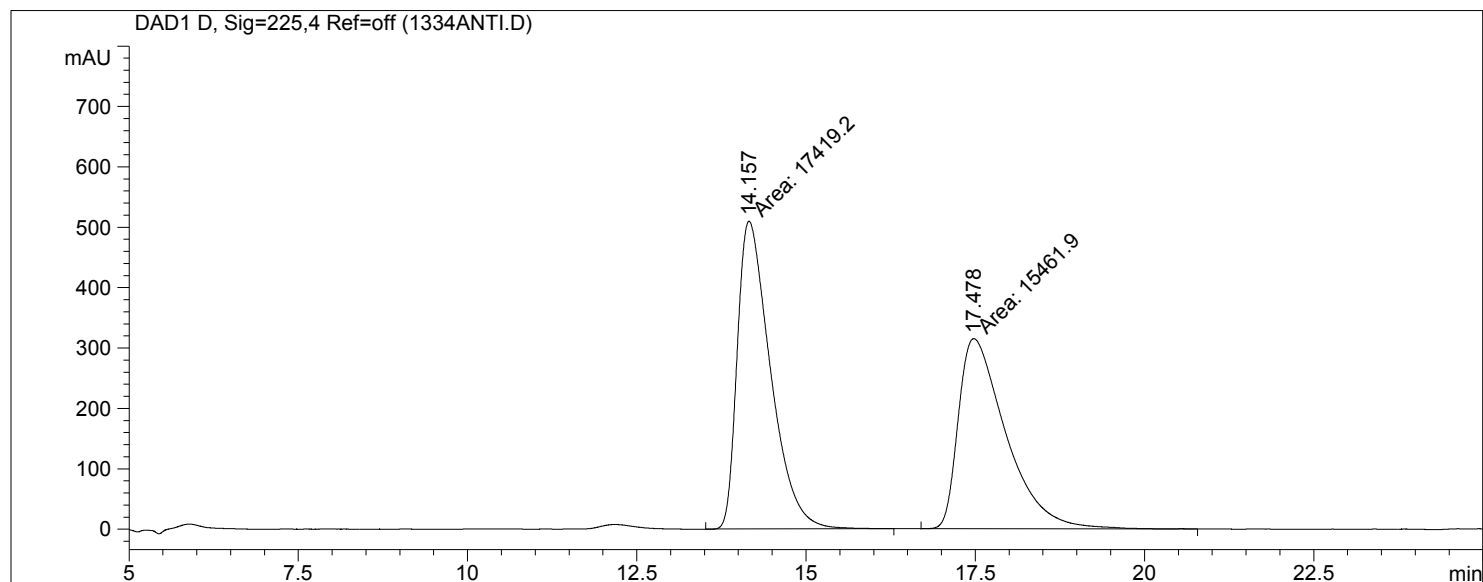

```

=====
Area Percent Report
=====

```

```

Sorted By      :      Signal
Multiplier     :      1.0000
Dilution       :      1.0000
Use Multiplier & Dilution Factor with ISTDs

```

Signal 1: DAD1 D, Sig=225,4 Ref=off

| Peak # | RetTime [min] | Type | Width [min] | Area [mAU*s] | Height [mAU] | Area %  |
|--------|---------------|------|-------------|--------------|--------------|---------|
| 1      | 14.157        | MM   | 0.5693      | 1.74192e4    | 509.93698    | 52.9764 |
| 2      | 17.478        | MM   | 0.8176      | 1.54619e4    | 315.17816    | 47.0236 |

```
Totals :                3.28811e4    825.11514
```

Results obtained with standard integrator!

```

=====
*** End of Report ***

```

```

=====
Injection Date   : 4/19/2019 6:10:30 PM      Seq. Line   :    1
Sample Name     : RM1343SM-4                Location    : Vial 1
Acq. Operator   : ca                       Inj         :    1
Acq. Instrument : Instrument 1              Inj Volume  : 5 µl
Different Inj Volume from Sequence !      Actual Inj Volume : 8 µl
Acq. Method     : C:\HPCHEM\1\METHODS\NORMAL\CHIRAL\OJ\05IPARM2.M
Last changed    : 4/19/2019 5:49:00 PM by ca
Analysis Method : C:\HPCHEM\1\METHODS\NORMAL\CHIRAL\OJ\05IPARM.M
Last changed    : 4/19/2019 5:46:27 PM by ca
                  (modified after loading)

```

**S1 racemic standard**

```

Chiralcel OJ-H, 1.0 ml/min, 30C
Normal Phase Chiral
95:5 Hexanes:iPrOH

```

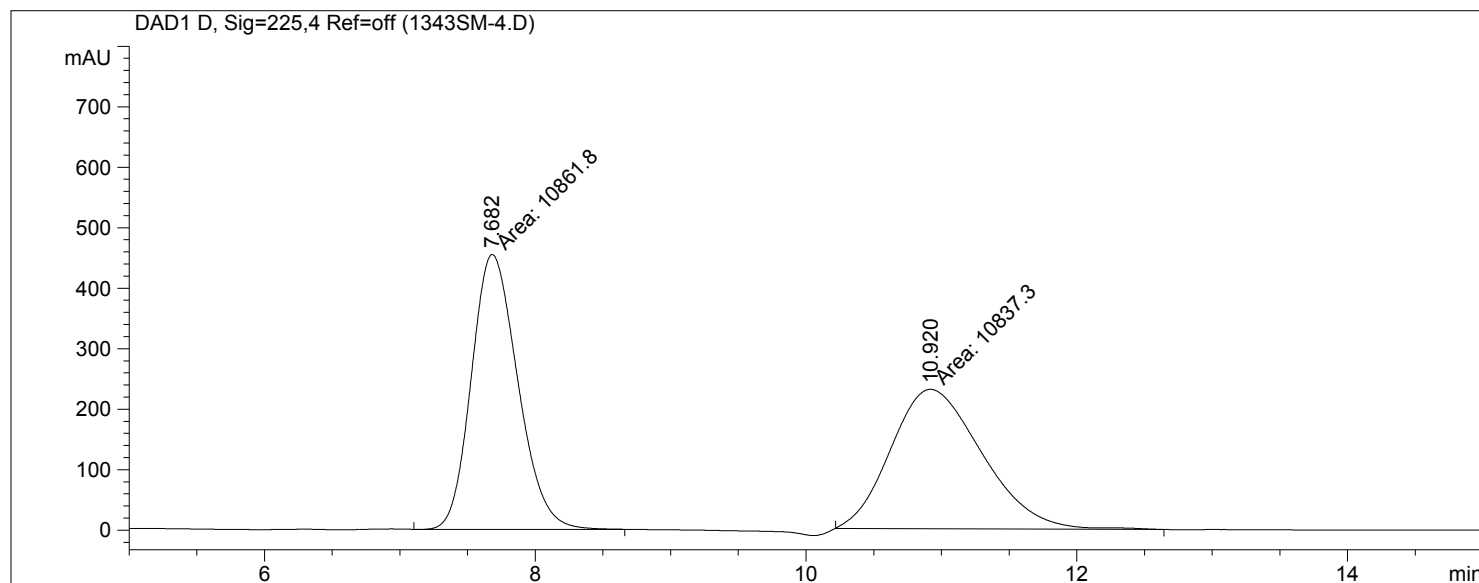

```

=====
Area Percent Report
=====

```

```

Sorted By      :      Signal
Multiplier     :      1.0000
Dilution      :      1.0000
Use Multiplier & Dilution Factor with ISTDs

```

Signal 1: DAD1 D, Sig=225,4 Ref=off

| Peak # | RetTime [min] | Type | Width [min] | Area [mAU*s] | Height [mAU] | Area %  |
|--------|---------------|------|-------------|--------------|--------------|---------|
| 1      | 7.682         | MM   | 0.3981      | 1.08618e4    | 454.78665    | 50.0565 |
| 2      | 10.920        | MM   | 0.7825      | 1.08373e4    | 230.82843    | 49.9435 |

```
Totals :                2.16992e4    685.61508
```

Results obtained with standard integrator!

```

=====
*** End of Report ***

```

```

=====
Injection Date   : 4/19/2019 3:22:43 PM      Seq. Line :    1
Sample Name     : RM1343RSM                  Location  : Vial 1
Acq. Operator   : ca                        Inj       :    1
Acq. Instrument : Instrument 1                Inj Volume: 5 µl
Different Inj Volume from Sequence !      Actual Inj Volume : 10 µl
Acq. Method     : C:\HPCHEM\1\METHODS\NORMAL\CHIRAL\OJ\05IPARM.M
Last changed    : 4/19/2019 2:18:34 PM by ca
Analysis Method : C:\HPCHEM\1\METHODS\NORMAL\CHIRAL\OJ\05IPARM.M
Last changed    : 4/19/2019 3:58:42 PM by ca
                  (modified after loading)

```

**recovered starting  
material S1**

```

Chiralcel OJ-H, 1.0 ml/min, 30C
Normal Phase Chiral
95:5 Hexanes:iPrOH

```

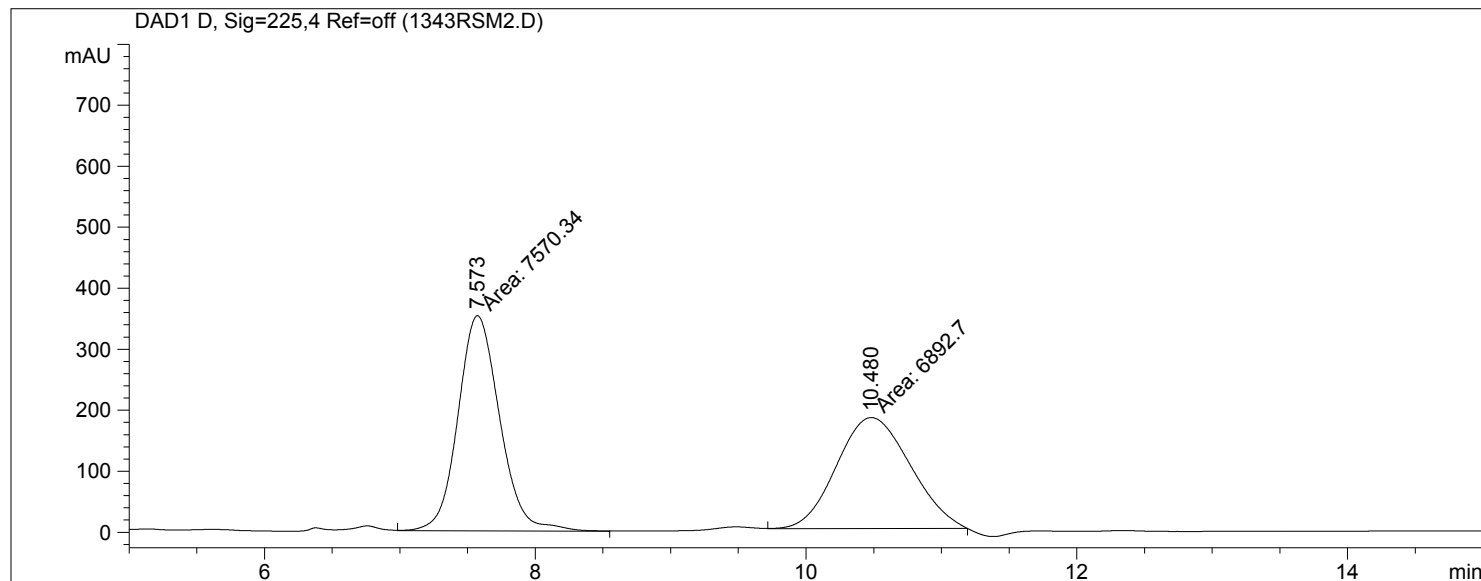

=====  
Area Percent Report  
=====

```

Sorted By      :      Signal
Multiplier     :      1.0000
Dilution       :      1.0000
Use Multiplier & Dilution Factor with ISTDs

```

Signal 1: DAD1 D, Sig=225,4 Ref=off

| Peak # | RetTime [min] | Type | Width [min] | Area [mAU*s] | Height [mAU] | Area %  |
|--------|---------------|------|-------------|--------------|--------------|---------|
| 1      | 7.573         | MM   | 0.3574      | 7570.34277   | 352.98996    | 52.3427 |
| 2      | 10.480        | MM   | 0.6307      | 6892.70361   | 182.14532    | 47.6573 |

Totals :                                    1.44630e4    535.13528

Results obtained with standard integrator!

=====  
\*\*\* End of Report \*\*\*
